# Supplementary material for: SUMO is a pervasive regulator of meiosis
Source: eLife. 2021 Jan 27;10:e57720. doi: 10.7554/eLife.57720 (PMC7924959; doi:10.7554/eLife.57720)
Supplement: Supplementary file 2. — Compilation of useful tables generated by MaxQuant is a single combined search of all samples: ProteinGroups: All proteins including unmodified proteins, contaminants and false positives GlyGly sites: SUMO sites Phospho (STY) sites: phosphorylated serine, threonine and tyrosine residues ModificationSpecific Peptides: All identified peptides and their relevant modifications Oxidation (M) sites: Oxidized methionine residues. [file elife-57720-supp2.xlsx]

## Sheet: Legend
Supplementary File 2. Key MaxQuant Tables: Compilation of useful tables generated by MaxQuant is a single combined search of all samples
ProteinGroups	All proteins identified in a single search of all samples
GlyGly sites	SUMO sites
Phospho (STY) sites	phosphorylated serine, threonine and tyrosine residues
ModificationSpecific Peptides	All identified peptides and their relevant modifications
Oxidation (M) sites	Oxidized methionine residues

## Sheet: ProteinGroups
Protein IDs	Majority protein IDs	Peptide counts (all)	Peptide counts (razor+unique)	Peptide counts (unique)	Protein names	Gene names	Fasta headers	Number of proteins	Peptides	Razor + unique peptides	Unique peptides	Peptides 0_1	Peptides 0_2	Peptides 0_3	Peptides 0_4	Peptides 1_1	Peptides 1_2	Peptides 1_3	Peptides 1_4	Peptides 2_1	Peptides 2_2	Peptides 2_3	Peptides 2_4	Peptides 2_5	Peptides 2_6	Peptides 2_7	Peptides 3_1	Peptides 3_2	Peptides 3_3	Peptides 3_4	Peptides 3_5	Peptides 5_1	Peptides 5_2	Peptides 5_3	Peptides 5_4	Peptides 5_5	Peptides 6_1	Peptides 6_2	Peptides 6_3	Peptides 6_4	Peptides 6_5	Peptides 6_6	Razor + unique peptides 0_1	Razor + unique peptides 0_2	Razor + unique peptides 0_3	Razor + unique peptides 0_4	Razor + unique peptides 1_1	Razor + unique peptides 1_2	Razor + unique peptides 1_3
A0A0B7P3V8;Q6Q5P6;P47023	A0A0B7P3V8	3;1;1	1;0;0	1;0;0		YPL060C-A		3	3	1	1	1	1	2	1	0	0	1	0	0	0	0	1	1	2	0	1	1	0	0	0	2	1	0	0	0	2	2	1	1	0	0	0	0	0	0	0	0	0
CON__ENSEMBL:ENSBTAP00000016285	CON__ENSEMBL:ENSBTAP00000016285	1	1	1				1	1	1	1	1	1	1	1	1	0	1	0	1	1	1	0	0	0	0	1	1	1	0	0	1	1	1	0	0	0	1	1	0	0	0	1	1	1	1	1	0	1
CON__H-INV:HIT000292931;CON__P05787	CON__H-INV:HIT000292931;CON__P05787	1;1	1;1	1;1			;	2	1	1	1	0	0	0	0	0	0	0	0	1	1	1	1	0	0	0	1	1	1	1	0	0	1	1	1	1	1	1	1	1	0	1	0	0	0	0	0	0	0
CON__P00711	CON__P00711	1	1	1				1	1	1	1	0	0	0	0	0	0	0	0	0	0	0	0	0	0	0	0	0	0	0	1	0	0	0	0	1	0	0	0	0	0	1	0	0	0	0	0	0	0
CON__P02584	CON__P02584	1	1	1				1	1	1	1	0	0	0	0	0	0	0	0	0	0	0	0	0	0	0	0	0	0	0	0	0	0	0	0	0	0	0	0	0	1	0	0	0	0	0	0	0	0
CON__P02769	CON__P02769	8	8	7				1	8	8	7	0	0	2	1	0	0	0	0	0	0	0	0	0	6	4	0	0	0	0	1	0	0	0	0	3	0	0	0	0	0	0	0	0	2	1	0	0	0
CON__P0C1U8	CON__P0C1U8	10	10	10				1	10	10	10	3	3	7	7	5	1	7	4	3	3	3	1	0	0	4	4	4	3	2	0	4	3	5	3	0	3	4	3	5	0	0	3	3	7	7	5	1	7
CON__P15636	CON__P15636	5	5	5				1	5	5	5	4	4	4	4	4	4	4	4	4	4	4	3	1	2	1	4	4	4	3	1	4	4	4	4	1	4	4	4	4	1	1	4	4	4	4	4	4	4
O13297	O13297	7	7	7	mRNA-capping enzyme subunit beta	CET1		1	7	7	7	1	2	2	1	1	1	2	3	1	1	2	2	2	5	4	1	1	1	3	1	1	1	1	1	1	2	1	1	3	1	1	1	2	2	1	1	1	2
O13329	O13329	8	8	8	DNA replication fork-blocking protein FOB1	FOB1		1	8	8	8	7	8	7	7	7	6	6	6	6	7	4	5	4	3	7	6	3	3	5	2	3	4	3	3	0	5	5	3	1	1	1	7	8	7	7	7	6	6
O13516;P05755	O13516;P05755	6;5	6;5	6;5	40S ribosomal protein S9-A;40S ribosomal protein S9-B	RPS9A;RPS9B	;	2	6	6	6	1	2	1	2	2	1	2	2	2	1	1	2	1	2	4	1	1	1	3	1	1	1	1	4	1	1	2	1	1	0	1	1	2	1	2	2	1	2
Q99231;Q92393;Q12316;Q12088;Q04670;Q03855;Q03619;P0C2I2;Q12193;P0C2J0;O13535;Q07793;Q99337;Q12414;Q12273;Q12269;Q12141;Q04711;Q03612;Q03434;P47100;P47098;P0C2J1;P0C2I9;P0C2I6;P0C2I3;Q12441;Q12217;Q03856;P0CX69;P0CX68;P0CX67;P0CX66;P0CX65;P0CX60;P0CX59;P0C2I4;P0C2I5;Q92392;Q6Q5H1;Q12485;Q12470;Q12085;Q04706;P47099;P0CX76;P0CX75;P0CX74;P0CX73;P0CX72;P0CX71;P0CX70;P0CX58;P0CX57;P0C2I8;O74302;Q12112;…	Q99231;Q92393;Q12316;Q12088;Q04670;Q03855;Q03619;P0C2I2;Q12193;P0C2J0;O13535;Q07793;Q99337;Q12414;Q12273;Q12269;Q12141;Q04711;Q03612;Q03434;P47100;P47098;P0C2J1;P0C2I9;P0C2I6;P0C2I3;Q12441;Q12217;Q03856;P0CX69;P0CX68;P0CX67;P0CX66;P0CX65;P0CX60;P0CX59;P0C2I4;P0C2I5	5;5;5;5;5;5;5;5;5;5;5;4;4;4;4;4;4;4;4;4;4;4;4;4;4;4;3;3;3;3;3;3;3;3;3;3;3;3;2;2;2;2;2;2;2;2;2;2;2;2;2;2;2;2;2;2;2;1	4;4;4;4;4;4;4;4;4;4;4;3;3;3;3;3;3;3;3;3;3;3;3;3;3;3;3;3;3;3;3;3;3;3;3;3;3;2;2;2;2;2;2;2;2;2;2;2;2;2;2;2;2;2;2;2;1;0	3;3;3;3;3;3;3;3;3;3;3;2;2;2;2;2;2;2;2;2;2;2;2;2;2;2;3;3;3;3;3;3;3;3;3;3;3;2;2;2;2;2;2;2;2;2;2;2;2;2;2;2;2;2;2;2;0;0	Transposon Ty1-DR3 Gag-Pol polyprotein;Capsid protein;Ty1 protease;Integrase;Reverse transcriptase/ribonuclease H;Transposon Ty1-OR Gag-Pol polyprotein;Capsid protein;Ty1 protease;Integrase;Reverse transcriptase/ribonuclease H;Transposon Ty1-GR3 Gag-Pol polyprotein;Capsid protein;Ty1 protease;Integrase;Reverse transcriptase/ribonuclease H;Transposon Ty1-LR1 Gag-Pol polyprotein;Capsid protein;Ty1 …	TY1B-DR3;TY1B-OR;TY1B-GR3;TY1B-LR1;TY1B-MR2;TY1B-DR1;TY1B-ER2;TY1B-DR5;TY1B-BR;TY1B-PR2;TY1B-H;TY1B-DR4;TY1B-NL2;TY1B-PL;TY1B-OL;TY1B-GR2;TY1B-GR1;TY1B-ML1;TY1B-ER1;TY1B-ML2;TY1B-JR2;TY1B-JR1;TY1B-PR3;TY1B-PR1;TY1B-LR3;TY1B-DR6;TY1A-DR3;TY1A-BR;TY1A-DR1;TY1A-MR2;TY1A-LR1;TY1A-GR3;TY1A-ER2;TY1A-DR5;TY1A-PR2;TY1A-OR;TY1A-H;TY1B-LR2	;;;;;;;;;;;;;;;;;;;;;;;;;;;;;;;;;;;;;	58	5	4	3	0	2	3	4	0	1	4	3	0	0	1	1	1	1	0	0	0	0	2	0	0	0	0	2	1	0	0	1	1	0	0	0	2	2	3	0	1	4
O14455;P05745	O14455;P05745	5;3	5;3	5;3	60S ribosomal protein L36-B;60S ribosomal protein L36-A	RPL36B;RPL36A	;	2	5	5	5	2	0	2	2	0	0	0	2	2	0	0	2	0	2	4	2	0	0	2	1	1	1	1	1	2	2	0	0	1	0	0	2	0	2	2	0	0	0
O14467	O14467	8	8	8	Multiprotein-bridging factor 1	MBF1		1	8	8	8	2	3	6	5	5	3	3	4	4	6	3	4	3	0	5	7	7	3	7	1	5	5	8	5	2	6	6	7	7	1	3	2	3	6	5	5	3	3
O43137	O43137	4	4	4	Uncharacterized protein YBR085C-A	YBR085C-A		1	4	4	4	0	0	1	1	0	0	1	1	0	0	0	1	0	1	1	0	1	0	2	0	0	0	0	0	0	0	0	0	1	0	0	0	0	1	1	0	0	1
O94742	O94742	2	2	2	26S proteasome complex subunit SEM1	SEM1		1	2	2	2	1	0	0	0	0	0	0	1	0	0	0	1	0	0	2	1	1	0	2	0	0	0	0	1	0	0	0	1	0	0	0	1	0	0	0	0	0	0
P00044	P00044	6	6	6	Cytochrome c iso-1	CYC1		1	6	6	6	1	0	2	3	2	0	3	2	1	0	0	2	0	1	5	1	0	0	2	0	1	0	1	0	2	1	0	0	0	0	0	1	0	2	3	2	0	3
P00045	P00045	1	1	1	Cytochrome c iso-2	CYC7		1	1	1	1	0	0	0	0	0	0	0	0	0	0	0	0	0	0	1	0	0	0	0	0	0	0	0	0	0	0	0	0	0	0	0	0	0	0	0	0	0	0
P00127	P00127	1	1	1	Cytochrome b-c1 complex subunit 6	QCR6		1	1	1	1	0	0	0	0	0	1	1	0	0	1	1	0	0	0	0	0	1	1	0	0	1	1	0	0	0	0	0	1	0	0	0	0	0	0	0	0	1	1
P00128	P00128	1	1	1	Cytochrome b-c1 complex subunit 7	QCR7		1	1	1	1	0	0	0	0	0	0	1	0	0	0	1	0	0	1	0	0	0	0	0	0	0	1	0	0	1	0	0	1	0	0	0	0	0	0	0	0	0	1
P00175	P00175	2	2	2	Cytochrome b2, mitochondrial	CYB2		1	2	2	2	0	0	0	0	0	0	1	0	0	0	1	1	0	0	1	1	1	0	0	0	0	1	1	1	1	0	1	0	0	0	1	0	0	0	0	0	0	1
P00330	P00330	41	41	24	Alcohol dehydrogenase 1	ADH1		1	41	41	24	20	16	17	19	26	25	31	25	23	24	27	17	17	18	18	18	21	20	27	11	19	19	22	18	13	18	21	24	21	7	10	20	16	17	19	26	25	31
P00331	P00331	31	17	16	Alcohol dehydrogenase 2	ADH2		1	31	17	16	12	10	11	14	18	15	18	17	16	14	16	11	5	11	13	11	14	12	17	5	9	10	11	11	9	10	12	12	15	4	4	4	5	5	7	11	9	9
P00358	P00358	29	3	0	Glyceraldehyde-3-phosphate dehydrogenase 2	TDH2		1	29	3	0	13	11	14	14	13	9	14	14	12	11	12	11	14	17	13	12	12	9	15	9	10	13	12	13	8	12	12	11	13	2	10	1	0	0	0	0	0	0
P00359	P00359	34	34	8	Glyceraldehyde-3-phosphate dehydrogenase 3	TDH3		1	34	34	8	13	12	15	17	14	10	18	17	13	13	14	12	16	18	15	13	14	11	16	11	11	15	12	16	11	13	14	13	14	2	11	13	12	15	17	14	10	18
P00360	P00360	13	1	1	Glyceraldehyde-3-phosphate dehydrogenase 1	TDH1		1	13	1	1	7	5	6	8	8	5	7	8	6	6	6	7	7	8	8	6	7	6	9	4	6	6	7	6	4	6	6	6	6	2	6	0	0	0	1	0	0	0
P00410	P00410	1	1	1	Cytochrome c oxidase subunit 2	COX2		1	1	1	1	0	1	0	0	0	0	1	0	1	1	0	0	0	0	0	0	1	0	0	0	0	0	0	0	0	0	0	0	0	0	0	0	1	0	0	0	0	1
P00445	P00445	8	8	8	Superoxide dismutase [Cu-Zn]	SOD1		1	8	8	8	6	4	5	5	7	7	7	6	6	8	7	5	6	3	5	6	8	5	5	5	7	6	7	4	6	6	7	6	5	3	5	6	4	5	5	7	7	7
P00447	P00447	4	4	4	Superoxide dismutase [Mn], mitochondrial	SOD2		1	4	4	4	0	1	0	2	2	2	2	3	2	2	3	2	0	1	2	2	2	2	2	1	2	2	2	1	1	2	2	3	2	0	1	0	1	0	2	2	2	2
P00549	P00549	12	12	12	Pyruvate kinase 1	CDC19		1	12	12	12	4	3	2	3	4	7	9	4	6	7	8	2	3	7	5	2	4	7	3	4	5	8	2	2	6	2	3	6	1	0	6	4	3	2	3	4	7	9
P00560	P00560	38	38	38	Phosphoglycerate kinase	PGK1		1	38	38	38	14	15	12	11	12	10	13	13	13	13	14	11	11	22	13	6	10	10	20	4	8	10	9	12	7	9	10	11	14	0	6	14	15	12	11	12	10	13
P00724	P00724	2	2	2	Invertase 2	SUC2		1	2	2	2	0	0	0	0	0	1	1	0	1	1	0	0	0	2	0	0	0	1	0	0	1	1	0	0	0	0	0	0	0	0	1	0	0	0	0	0	1	1
P00729	P00729	4	4	4	Carboxypeptidase Y	PRC1		1	4	4	4	0	0	0	1	2	2	2	3	2	2	2	1	0	2	0	2	2	2	1	1	2	2	2	2	1	1	2	2	1	0	1	0	0	0	1	2	2	2
P00812	P00812	7	7	7	Arginase	CAR1		1	7	7	7	1	0	0	0	1	1	3	1	3	2	2	0	0	3	1	1	3	3	1	1	2	2	3	3	2	1	3	2	0	0	2	1	0	0	0	1	1	3
P00815	P00815	1	1	1	Histidine biosynthesis trifunctional protein;Phosphoribosyl-AMP cyclohydrolase;Phosphoribosyl-ATP pyrophosphohydrolase;Histidinol dehydrogenase	HIS4		1	1	1	1	0	0	0	1	1	1	1	1	1	1	1	1	0	0	1	1	1	1	1	0	1	1	1	1	0	1	1	1	1	0	0	0	0	0	1	1	1	1
P00817	P00817	17	17	17	Inorganic pyrophosphatase	IPP1		1	17	17	17	3	4	5	3	8	7	7	4	11	6	7	3	4	7	5	4	6	8	6	3	7	7	7	6	6	4	8	8	3	0	5	3	4	5	3	8	7	7
P00890;P08679	P00890	10;1	10;1	10;1	Citrate synthase, mitochondrial	CIT1		2	10	10	10	2	2	2	2	2	1	1	2	2	2	2	3	2	4	4	2	2	1	1	0	1	1	2	2	0	1	2	1	1	0	0	2	2	2	2	2	1	1
P00924	P00924	21	6	6	Enolase 1	ENO1		1	21	6	6	3	2	3	3	6	5	12	5	11	9	12	4	2	8	9	2	3	6	6	2	4	10	3	3	5	2	3	7	3	0	2	2	1	2	1	3	3	3
P00925	P00925	29	29	14	Enolase 2	ENO2		1	29	29	14	1	3	3	2	6	5	11	8	11	10	13	4	0	13	9	1	4	6	5	2	5	10	4	3	7	2	4	7	3	0	5	1	3	3	2	6	5	11
P00931	P00931	2	2	2	Tryptophan synthase	TRP5		1	2	2	2	0	0	2	1	1	2	1	2	0	0	0	0	1	1	0	1	1	1	1	1	1	1	2	1	0	1	1	2	2	0	1	0	0	2	1	1	2	1
P00942	P00942	14	14	14	Triosephosphate isomerase	TPI1		1	14	14	14	0	0	2	0	2	3	7	3	5	6	8	0	1	10	4	1	4	3	1	2	4	5	2	0	5	2	4	5	0	0	4	0	0	2	0	2	3	7
P00950	P00950	9	9	9	Phosphoglycerate mutase 1	GPM1		1	9	9	9	4	4	5	5	5	6	4	6	4	5	5	5	2	5	2	2	4	3	6	0	4	3	3	5	3	4	2	3	6	2	1	4	4	5	5	5	6	4
P01094	P01094	3	3	3	Protease A inhibitor 3	PAI3		1	3	3	3	1	0	1	0	1	0	1	0	1	1	1	0	1	1	2	1	1	1	3	2	0	1	0	1	0	0	1	0	1	1	0	1	0	1	0	1	0	1
P01097	P01097	2	2	2	ATPase inhibitor, mitochondrial	INH1		1	2	2	2	2	1	2	2	2	2	2	2	2	2	0	2	1	0	0	2	1	0	1	0	1	1	1	2	0	1	1	2	2	0	0	2	1	2	2	2	2	2
P01098	P01098	1	1	1	ATPase-stabilizing factor 9 kDa, mitochondrial	STF1		1	1	1	1	1	1	0	1	1	1	0	0	1	0	0	0	0	0	1	0	0	0	1	0	1	0	0	0	0	0	0	0	1	0	0	1	1	0	1	1	1	0
P02293	P02293	15	2	2	Histone H2B.1	HTB1		1	15	2	2	7	8	7	9	10	11	11	10	11	10	12	10	6	5	7	12	10	11	10	8	10	12	11	10	7	11	11	11	10	5	6	1	1	1	0	1	1	1
P02294	P02294	15	15	2	Histone H2B.2	HTB2		1	15	15	2	7	8	7	10	10	11	11	11	11	10	12	12	7	5	8	12	10	11	11	8	11	12	11	11	7	11	11	11	11	6	6	7	8	7	10	10	11	11
P02309	P02309	6	6	6	Histone H4	HHF1		1	6	6	6	4	4	4	2	4	4	4	2	4	4	4	2	2	4	1	4	4	4	2	4	4	4	4	2	4	4	4	4	2	2	4	4	4	4	2	4	4	4
P02381	P02381	1	1	1	Ribosomal protein VAR1, mitochondrial	VAR1		1	1	1	1	0	0	0	0	0	0	0	0	0	0	0	0	0	1	0	0	0	0	0	0	0	0	0	0	0	0	1	0	0	0	0	0	0	0	0	0	0	0
P02406	P02406	26	26	26	60S ribosomal protein L28	RPL28		1	26	26	26	17	18	19	17	18	17	18	17	19	18	17	16	14	18	13	16	18	15	16	13	18	17	17	16	16	17	18	16	18	13	14	17	18	19	17	18	17	18
;118940;118941;118942;118943;118944;118945;118946;118947;118948;118949;118950;118951;118952;118953;118954;118955;118956;118957;118958;118959;118960;118961;118962;118963;118964;118965;118966;118967;118968;118969;118970;118971;118972;118973;118974;118975;118976;118977;118978;118979;118980;118981;118982;118983;118984;118985;118986;118987;118988;118989;118990;118991;118992;118993;118994;118995;118996…
9;123620;123621;123622;123623;123624;123625;123626;123627;123628;123629;123630;123631;123632;123633;123634;123635;123636;123637;123638;123639;123640;123641;123642;123643;123644;123645;123646;123647;123648;123649;123650;123651;123652;123653;123654;123655;123656;123657;123658;123659;123660;123661;123662;123663;123664;123665;123666;123667;123668;123669;123670;123671;123672;123673;123674;123675;12367…
99;128300;128301;128302;128303;128304;128305;128306;128307;128308;128309;128310;128311;128312;128313;128314;128315;128316;128317;128318;128319;128320;128321;128322;128323;128324;128325;128326;128327;128328;128329;128330;128331;128332;128333;128334;128335;128336;128337;128338;128339;128340;128341;128342;128343;128344;128345;128346;128347;128348;128349;128350;128351;128352;128353;128354;128355;1283…
350;135351;135352;135353;135354;135355;135356;135357;135358;135359;135360;135361;135362;135363;135364;135365;135366;135367;135368;135369;135370;135371;135372;135373;135374;135375;135376;135377;135378;135379;135380;135381;135382;135383;135384;135385;135386;135387;135388;135389;135390;135391;135392;135393;135394;135395;135396;135397;135398;135399;135400;135401;135402;135403;135404;135405;135406;135…
5869;395870;395871;395872;395873;395874;395875;395876;395877;395878;395879;395880;395881;395882;395883;395884;395885;395886;395887;395888;395889;395890;395891;395892;395893;395894;395895;395896;395897;395898;395899;395900;395901;395902;395903;395904;395905;395906;395907;395908;395909;395910;395911;395912;395913;395914;395915;395916;395917;395918;395919;395920;395921;395922;395923;395924;395925;39…	21897;21981;34223;55344;55796;92474;93333;120409;131327;134898;136378;154894;157690;158030;188042;217024;217264;217401;217490;244201;252439;273662;311704;362340;395826;396123	157;158;159;160;161;162;163;164;165	23;24;25		55;86;92;96;111;115;126;132;137	34;45;58
P14127;P02407	P14127;P02407	14;14	14;14	14;14	40S ribosomal protein S17-B;40S ribosomal protein S17-A	RPS17B;RPS17A	;	2	14	14	14	7	7	6	8	8	5	8	7	8	5	4	10	4	3	4	5	7	3	10	3	5	5	5	8	4	6	6	6	6	1	2	7	7	6	8	8	5	8
P02557	P02557	5	5	5	Tubulin beta chain	TUB2		1	5	5	5	0	0	0	1	1	1	2	2	1	1	1	1	0	1	0	1	0	2	1	0	2	4	1	1	0	2	2	2	2	0	2	0	0	0	1	1	1	2
P02829	P02829	13	4	4	ATP-dependent molecular chaperone HSP82	HSP82		1	13	4	4	3	2	5	4	3	1	2	4	4	3	2	3	1	7	4	6	4	4	6	1	3	4	5	5	2	5	7	5	4	0	1	2	2	2	2	2	0	1
P02992	P02992	7	7	7	Elongation factor Tu, mitochondrial	TUF1		1	7	7	7	4	4	4	5	4	5	5	4	5	5	5	2	2	3	3	3	4	5	5	1	5	4	4	3	3	4	4	4	2	0	3	4	4	4	5	4	5	5
P02994	P02994	37	37	37	Elongation factor 1-alpha	TEF1		1	37	37	37	16	16	18	19	21	23	21	19	23	23	17	13	11	12	15	17	20	17	21	9	17	18	17	17	6	17	22	17	18	7	10	16	16	18	19	21	23	21
P03069	P03069	3	3	3	General control protein GCN4	GCN4		1	3	3	3	1	1	3	1	1	1	1	0	1	1	1	0	1	1	1	0	1	1	2	1	1	1	0	1	0	0	0	0	0	0	1	1	1	3	1	1	1	1
P03870	P03870	9	9	9	Site-specific recombinase Flp	FLP1		1	9	9	9	5	5	5	5	5	5	5	4	5	5	5	6	2	3	5	7	5	5	6	2	5	5	5	6	2	7	6	7	5	1	3	5	5	5	5	5	5	5
P03871	P03871	4	4	4	Partitioning protein REP1	REP1		1	4	4	4	0	1	1	0	0	0	0	0	0	0	0	0	0	3	0	1	1	0	1	0	0	0	0	0	0	1	1	0	0	0	0	0	1	1	0	0	0	0
P03872	P03872	13	13	13	Partitioning protein REP2	REP2		1	13	13	13	6	5	7	2	7	4	7	4	6	8	5	3	5	9	7	7	8	5	7	4	6	5	6	7	4	7	7	6	5	0	4	6	5	7	2	7	4	7
P03962	P03962	8	8	8	Orotidine 5-phosphate decarboxylase	URA3		1	8	8	8	1	0	0	0	1	0	1	1	2	0	2	0	1	3	4	0	0	0	1	0	1	0	2	0	3	0	0	1	1	0	0	1	0	0	0	1	0	1
P04037	P04037	14	14	14	Cytochrome c oxidase subunit 4, mitochondrial	COX4		1	14	14	14	4	0	3	4	6	5	8	5	2	4	4	2	4	2	2	2	2	1	6	2	3	2	6	2	3	1	1	1	4	1	1	4	0	3	4	6	5	8
P04046	P04046	2	2	2	Amidophosphoribosyltransferase	ADE4		1	2	2	2	1	1	1	1	1	0	0	0	1	0	0	0	0	1	0	0	0	0	0	0	0	1	0	0	0	0	0	0	1	0	0	1	1	1	1	1	0	0
P04050	P04050	1	1	1	DNA-directed RNA polymerase II subunit RPB1	RPO21		1	1	1	1	1	1	1	0	0	0	0	0	1	1	0	0	0	0	1	1	0	0	1	0	1	1	0	0	0	1	1	1	0	0	0	1	1	1	0	0	0	0
P04076	P04076	1	1	1	Argininosuccinate lyase	ARG4		1	1	1	1	1	1	1	1	0	1	0	0	0	0	0	1	0	0	1	0	0	0	0	0	0	0	0	0	0	0	1	0	1	1	0	1	1	1	1	0	1	0
P04147	P04147	2	2	2	Polyadenylate-binding protein, cytoplasmic and nuclear	PAB1		1	2	2	2	0	0	0	0	0	0	0	1	0	0	0	0	0	1	1	0	0	0	1	0	0	0	0	0	1	0	0	0	0	0	0	0	0	0	0	0	0	0
P04386	P04386	5	5	5	Regulatory protein GAL4	GAL4		1	5	5	5	1	1	1	1	2	2	1	1	1	2	0	1	0	3	1	2	1	0	1	0	0	0	1	1	0	3	2	2	1	0	0	1	1	1	1	2	2	1
P04449	P04449	14	14	4	60S ribosomal protein L24-A	RPL24A		1	14	14	4	6	5	7	8	7	5	6	8	8	3	3	4	5	7	9	8	6	5	9	3	5	4	5	7	5	8	4	2	6	2	4	6	5	7	8	7	5	6
P04456	P04456	12	12	12	60S ribosomal protein L25	RPL25		1	12	12	12	9	7	8	10	9	8	7	9	7	8	7	10	6	5	11	8	6	8	10	6	8	7	7	10	7	5	7	8	10	4	4	9	7	8	10	9	8	7
P04710	P04710	1	1	1	ADP,ATP carrier protein 1	AAC1		1	1	1	1	0	0	0	0	0	0	0	0	0	0	1	0	0	0	0	1	1	0	0	0	0	0	0	0	0	0	1	1	0	0	0	0	0	0	0	0	0	0
P04786	P04786	9	9	9	DNA topoisomerase 1	TOP1		1	9	9	9	5	4	4	3	4	4	3	3	4	3	0	1	4	6	4	4	4	2	3	2	1	3	3	2	1	3	3	1	1	0	2	5	4	4	3	4	4	3
P04802	P04802	6	6	6	Aspartate--tRNA ligase, cytoplasmic	DPS1		1	6	6	6	6	5	5	3	5	6	6	3	5	4	5	3	1	0	0	5	4	2	3	1	4	5	4	3	1	4	4	4	3	0	2	6	5	5	3	5	6	6
P04803	P04803	2	2	2	Tryptophan--tRNA ligase, mitochondrial	MSW1		1	2	2	2	0	0	0	0	0	1	0	0	0	0	1	0	0	0	0	0	0	1	0	0	0	0	0	0	1	0	0	1	0	0	0	0	0	0	0	0	1	0
P04806;P04807	P04806	7;2	7;2	7;2	Hexokinase-1	HXK1		2	7	7	7	2	1	3	4	1	1	2	3	2	3	2	3	3	1	2	2	3	2	4	0	2	3	1	3	0	1	1	2	3	0	0	2	1	3	4	1	1	2
P04840	P04840	8	8	8	Mitochondrial outer membrane protein porin 1	POR1		1	8	8	8	0	0	1	0	1	1	4	0	2	2	3	0	0	6	2	1	1	3	0	2	3	2	1	1	3	1	2	3	0	0	1	0	0	1	0	1	1	4
P04911	P04911	7	7	2	Histone H2A.1	HTA1		1	7	7	2	4	4	4	5	4	3	3	5	4	4	4	5	5	3	2	4	4	4	5	3	6	5	4	5	4	5	5	5	5	0	3	4	4	4	5	4	3	3
P04912	P04912	7	2	2	Histone H2A.2	HTA2		1	7	2	2	4	4	4	4	4	3	3	5	4	4	4	5	5	1	2	4	4	4	5	3	6	5	4	4	4	5	5	5	5	0	3	2	2	2	1	2	2	2
P05150	P05150	1	1	1	Ornithine carbamoyltransferase	ARG3		1	1	1	1	0	0	0	0	1	1	1	1	0	1	1	0	0	1	0	0	0	1	0	0	1	1	0	0	1	1	0	0	0	0	1	0	0	0	0	1	1	1
P05319	P05319	1	1	1	60S acidic ribosomal protein P2-alpha	RPP2A		1	1	1	1	1	1	1	0	1	1	1	1	1	0	0	0	0	1	0	0	0	0	0	0	0	0	0	0	1	0	0	0	1	0	0	1	1	1	0	1	1	1
P05373	P05373	5	5	5	Delta-aminolevulinic acid dehydratase	HEM2		1	5	5	5	0	0	0	0	2	2	2	3	1	2	2	0	1	2	1	1	1	2	2	1	1	1	1	0	2	1	1	1	2	1	0	0	0	0	0	2	2	2
P05694	P05694	2	2	2	5-methyltetrahydropteroyltriglutamate--homocysteine methyltransferase	MET6		1	2	2	2	0	0	0	0	0	0	1	0	0	1	1	0	0	0	0	0	0	1	0	0	1	0	0	0	2	0	0	0	0	0	1	0	0	0	0	0	0	1
P05737	P05737	14	14	2	60S ribosomal protein L7-A	RPL7A		1	14	14	2	2	4	7	6	4	4	4	7	2	4	4	4	1	7	5	3	4	3	8	5	6	2	2	7	3	3	3	4	4	0	3	2	4	7	6	4	4	4
P05738	P05738	18	18	3	60S ribosomal protein L9-A	RPL9A		1	18	18	3	8	6	8	5	8	8	7	7	12	7	5	5	3	9	7	6	6	7	9	3	8	5	6	9	3	5	9	7	7	1	2	8	6	8	5	8	8	7
P05739	P05739	2	1	1	60S ribosomal protein L6-B	RPL6B		1	2	1	1	0	0	0	1	0	0	0	1	1	0	0	1	1	0	1	1	0	0	1	0	0	1	0	1	2	1	1	1	1	0	0	0	0	0	1	0	0	0
P46990;P05740	P46990;P05740	7;7	7;7	7;7	60S ribosomal protein L17-B;60S ribosomal protein L17-A	RPL17B;RPL17A	;	2	7	7	7	1	2	0	2	2	2	1	2	3	1	2	0	0	5	2	2	1	2	4	0	1	2	1	2	1	2	1	1	2	0	0	1	2	0	2	2	2	1
P05744	P05744	7	7	1	60S ribosomal protein L33-A	RPL33A		1	7	7	1	3	5	5	5	5	3	4	4	4	3	5	5	1	2	3	2	2	2	4	1	2	3	1	4	2	3	3	2	3	0	0	3	5	5	5	5	3	4
P05747	P05747	7	7	7	60S ribosomal protein L29	RPL29		1	7	7	7	5	3	4	3	6	5	5	4	5	6	6	4	1	0	2	5	5	5	4	3	5	5	5	4	5	5	5	5	4	1	4	5	3	4	3	6	5	5
P05748;P54780	P05748;P54780	11;9	11;9	11;9	60S ribosomal protein L15-A;60S ribosomal protein L15-B	RPL15A;RPL15B	;	2	11	11	11	2	4	5	4	6	5	6	5	6	5	4	4	4	7	3	4	5	4	6	4	5	4	4	4	6	4	4	4	6	0	5	2	4	5	4	6	5	6
P05749;P56628	P05749;P56628	4;2	4;2	4;2	60S ribosomal protein L22-A;60S ribosomal protein L22-B	RPL22A;RPL22B	;	2	4	4	4	1	1	1	1	0	1	1	1	1	1	0	1	0	3	1	1	0	0	2	0	0	0	1	2	0	0	1	0	1	1	1	1	1	1	1	0	1	1
P05750	P05750	9	9	9	40S ribosomal protein S3	RPS3		1	9	9	9	3	3	2	3	5	4	4	2	4	5	5	1	2	3	2	4	4	5	3	2	5	7	2	3	3	4	5	4	2	0	3	3	3	2	3	5	4	4
P05756	P05756	8	8	8	40S ribosomal protein S13	RPS13		1	8	8	8	3	3	2	0	0	0	1	1	0	1	0	2	1	4	2	1	1	1	4	0	2	1	1	1	0	0	1	0	1	0	1	3	3	2	0	0	0	1
P05759;P0CG63	P05759	30;13	30;13	17;0	Ubiquitin-40S ribosomal protein S31;Ubiquitin;40S ribosomal protein S31	RPS31		2	30	30	17	19	15	18	18	18	19	21	18	20	19	18	19	13	13	21	15	17	16	22	11	17	15	14	18	10	17	16	13	20	5	9	19	15	18	18	18	19	21
P06100	P06100	1	1	1	General negative regulator of transcription subunit 2	CDC36		1	1	1	1	0	0	0	0	0	0	0	0	0	0	0	0	0	1	0	0	0	0	1	0	0	0	0	0	0	1	0	0	1	0	0	0	0	0	0	0	0	0
P06105	P06105	2	2	2	Protein SCP160	SCP160		1	2	2	2	0	0	0	0	0	0	0	0	0	0	0	0	0	2	0	0	0	0	0	0	0	0	0	0	0	0	0	0	0	0	0	0	0	0	0	0	0	0
P06106	P06106	29	29	29	Protein MET17;O-acetylhomoserine sulfhydrylase;O-acetylserine sulfhydrylase	MET17		1	29	29	29	19	22	20	22	20	20	23	22	15	19	16	17	11	8	4	15	19	13	17	9	13	16	15	22	7	14	16	13	20	8	8	19	22	20	22	20	20	23
P06168	P06168	2	2	2	Ketol-acid reductoisomerase, mitochondrial	ILV5		1	2	2	2	0	0	0	0	1	1	1	1	1	1	2	0	0	1	0	0	1	1	0	1	1	1	0	1	1	1	1	1	0	0	1	0	0	0	0	1	1	1
P06169;P26263	P06169	18;1	18;1	17;0	Pyruvate decarboxylase isozyme 1	PDC1		2	18	18	17	4	4	6	9	4	5	7	3	4	4	5	3	4	7	6	3	2	4	6	2	3	5	4	4	4	5	5	5	5	0	2	4	4	6	9	4	5	7
P06208	P06208	1	1	1	2-isopropylmalate synthase	LEU4		1	1	1	1	1	1	0	0	1	1	1	0	1	1	1	0	0	0	0	1	1	1	0	0	1	1	1	0	0	0	1	1	0	0	0	1	1	0	0	1	1	1
P06367;P39516	P06367;P39516	4;3	4;3	4;3	40S ribosomal protein S14-A;40S ribosomal protein S14-B	RPS14A;RPS14B	;	2	4	4	4	0	3	2	1	1	2	1	1	2	0	0	0	1	3	2	1	1	0	3	1	1	0	1	2	1	1	1	0	2	0	0	0	3	2	1	1	2	1
P06633	P06633	11	11	11	Imidazoleglycerol-phosphate dehydratase	HIS3		1	11	11	11	10	6	4	5	9	5	6	5	10	7	6	4	1	0	1	7	6	5	6	2	9	6	6	6	3	7	7	5	5	1	1	10	6	4	5	9	5	6
P06700	P06700	6	6	6	NAD-dependent histone deacetylase SIR2	SIR2		1	6	6	6	3	2	5	1	2	2	2	2	2	1	1	1	1	2	1	1	1	1	2	1	2	1	0	0	0	2	0	0	2	0	1	3	2	5	1	2	2	2
P06701	P06701	8	8	8	Regulatory protein SIR3	SIR3		1	8	8	8	1	2	3	3	3	4	2	3	3	3	2	4	2	6	4	4	2	1	2	1	1	3	1	2	0	4	4	3	1	0	0	1	2	3	3	3	4	2
P06738	P06738	2	2	2	Glycogen phosphorylase	GPH1		1	2	2	2	0	0	0	1	0	0	0	1	0	0	0	0	0	1	0	0	0	0	1	0	0	0	0	1	0	0	0	0	1	0	0	0	0	0	1	0	0	0
P06773	P06773	1	1	1	Deoxycytidylate deaminase	DCD1		1	1	1	1	0	0	0	1	1	1	0	1	0	0	0	0	1	0	0	0	0	0	1	0	0	0	0	1	0	1	0	0	1	0	1	0	0	0	1	1	1	0
P06776	P06776	12	12	12	3,5-cyclic-nucleotide phosphodiesterase 2	PDE2		1	12	12	12	10	10	8	3	6	10	6	1	8	8	4	5	4	2	1	7	7	3	0	4	5	5	5	1	3	6	6	5	5	0	4	10	10	8	3	6	10	6
P06777	P06777	1	1	1	DNA repair protein RAD1	RAD1		1	1	1	1	0	0	1	0	0	0	0	0	1	0	0	0	0	0	1	0	0	0	1	0	0	0	0	0	0	0	0	0	0	0	0	0	0	1	0	0	0	0
P06778	P06778	14	14	14	DNA repair and recombination protein RAD52	RAD52		1	14	14	14	1	1	1	1	1	1	1	1	3	1	2	2	1	4	5	10	5	4	8	3	7	9	8	8	2	12	8	10	7	1	4	1	1	1	1	1	1	1
P06780	P06780	2	2	2	GTP-binding protein RHO1	RHO1		1	2	2	2	0	0	0	1	1	1	1	1	1	1	1	0	1	1	1	1	0	1	1	1	1	1	0	0	2	0	1	1	0	0	1	0	0	0	1	1	1	1
P06782	P06782	42	42	42	Carbon catabolite-derepressing protein kinase	SNF1		1	42	42	42	25	25	30	31	17	20	27	22	18	19	23	21	12	17	14	19	17	19	22	7	15	18	19	21	8	17	19	19	23	6	9	25	25	30	31	17	20	27
P06786	P06786	11	11	11	DNA topoisomerase 2	TOP2		1	11	11	11	4	3	3	5	4	5	4	5	5	5	4	5	4	9	6	6	5	4	5	1	5	5	4	5	3	6	6	4	4	1	5	4	3	3	5	4	5	4
P06787	P06787	1	1	1	Calmodulin	CMD1		1	1	1	1	0	0	0	0	0	0	0	0	0	0	0	0	0	1	0	0	0	0	0	0	0	0	0	0	0	0	0	0	0	0	0	0	0	0	0	0	0	0
P07149	P07149	1	1	1	Fatty acid synthase subunit beta;3-hydroxyacyl-[acyl-carrier-protein] dehydratase;Enoyl-[acyl-carrier-protein] reductase [NADH];[Acyl-carrier-protein] acetyltransferase;[Acyl-carrier-protein] malonyltransferase;S-acyl fatty acid synthase thioesterase	FAS1		1	1	1	1	0	0	0	0	0	0	0	0	0	0	0	0	1	0	0	0	0	0	0	0	0	0	0	0	0	0	0	0	0	0	0	0	0	0	0	0	0	0
P07170	P07170	5	4	4	Adenylate kinase	ADK1		1	5	4	4	1	1	3	2	1	2	2	3	2	2	2	3	1	1	1	1	3	2	2	0	2	2	1	2	1	1	1	2	1	0	0	1	0	3	2	1	2	2
P07244	P07244	1	1	1	Bifunctional purine biosynthetic protein ADE5,7;Phosphoribosylamine--glycine ligase;Phosphoribosylformylglycinamidine cyclo-ligase	ADE5,7		1	1	1	1	0	0	0	0	1	1	1	0	1	1	0	1	0	0	0	1	1	1	0	0	1	1	1	0	0	0	0	0	0	0	0	0	0	0	0	1	1	1
P07245	P07245	1	1	1	C-1-tetrahydrofolate synthase, cytoplasmic;Methylenetetrahydrofolate dehydrogenase;Methenyltetrahydrofolate cyclohydrolase;Formyltetrahydrofolate synthetase	ADE3		1	1	1	1	0	0	0	0	0	0	0	1	0	0	0	1	0	0	0	0	0	0	0	0	0	0	0	0	0	0	0	0	0	0	0	0	0	0	0	0	0	0
P07246	P07246	10	5	4	Alcohol dehydrogenase 3, mitochondrial	ADH3		1	10	5	4	3	2	2	2	5	4	8	4	6	6	7	2	0	0	4	3	5	2	3	1	3	7	6	3	2	4	4	4	2	0	1	2	1	1	1	3	1	3
P07251	P07251	8	8	8	ATP synthase subunit alpha, mitochondrial	ATP1		1	8	8	8	1	1	1	1	2	1	5	1	5	5	4	0	0	6	2	1	1	3	0	1	4	5	1	0	4	1	1	3	0	0	2	1	1	1	1	2	1	5
P07256	P07256	1	1	1	Cytochrome b-c1 complex subunit 1, mitochondrial	COR1		1	1	1	1	0	0	0	0	0	0	0	0	1	1	1	0	0	1	0	0	1	1	0	0	1	1	0	0	1	0	0	1	0	0	1	0	0	0	0	0	0	0
P07260	P07260	2	2	2	Eukaryotic translation initiation factor 4E	CDC33		1	2	2	2	2	2	1	1	2	2	1	2	2	2	2	1	2	1	1	2	2	2	2	2	2	2	2	2	2	1	2	1	2	0	1	2	2	1	1	2	2	1
P07261	P07261	4	4	4	Glycolytic genes transcriptional activator GCR1	GCR1		1	4	4	4	2	2	2	2	1	0	0	1	2	0	0	0	0	3	2	1	0	0	1	0	0	0	0	0	0	0	0	0	0	0	0	2	2	2	2	1	0	0
P07267	P07267	2	2	2	Saccharopepsin	PEP4		1	2	2	2	0	0	0	0	0	1	0	0	0	0	1	0	0	1	0	0	0	0	0	0	0	0	0	0	1	0	0	1	0	0	0	0	0	0	0	0	1	0
P07269	P07269	2	2	2	Regulatory protein PHO2	PHO2		1	2	2	2	1	1	1	0	1	1	1	0	1	1	1	0	1	0	1	1	1	0	0	1	1	1	1	0	1	1	1	1	0	0	1	1	1	1	0	1	1	1
P07271	P07271	4	4	4	ATP-dependent DNA helicase PIF1	PIF1		1	4	4	4	0	0	0	1	1	1	1	1	1	0	1	1	1	0	2	4	2	2	3	2	2	2	3	1	0	4	2	2	1	0	1	0	0	0	1	1	1	1
P07273	P07273	2	2	2	Transcription elongation factor S-II	DST1		1	2	2	2	0	1	0	0	0	0	0	0	0	0	0	1	0	2	1	0	0	0	0	1	0	0	0	0	0	0	0	0	1	1	0	0	1	0	0	0	0	0
P07275	P07275	1	1	1	Delta-1-pyrroline-5-carboxylate dehydrogenase, mitochondrial	PUT2		1	1	1	1	0	0	0	0	0	0	0	0	0	0	0	0	0	1	0	0	0	0	0	0	0	0	0	0	1	0	0	0	0	0	1	0	0	0	0	0	0	0
P07281;P07280	P07281;P07280	7;7	7;7	7;7	40S ribosomal protein S19-B;40S ribosomal protein S19-A	RPS19B;RPS19A	;	2	7	7	7	4	0	4	3	4	3	2	2	3	1	0	3	1	3	3	3	4	3	6	3	5	3	3	5	1	3	0	1	0	1	1	4	0	4	3	4	3	2
P07283	P07283	2	2	2	Phosphomannomutase	SEC53		1	2	2	2	0	0	2	0	2	2	2	0	2	2	2	0	0	1	0	0	1	1	0	0	2	1	1	0	1	1	1	1	0	0	1	0	0	2	0	2	2	2
P07285	P07285	2	2	2	Anthranilate phosphoribosyltransferase	TRP4		1	2	2	2	2	2	2	1	2	2	2	1	2	2	1	1	2	2	0	2	2	2	1	1	2	2	2	1	1	2	2	2	1	1	1	2	2	2	1	2	2	2
P07342	P07342	2	2	2	Acetolactate synthase catalytic subunit, mitochondrial	ILV2		1	2	2	2	1	1	1	1	1	2	1	1	1	1	1	1	1	1	0	1	1	1	1	1	1	1	1	1	1	1	0	1	1	1	1	1	1	1	1	1	2	1
P07991	P07991	38	38	38	Ornithine aminotransferase	CAR2		1	38	38	38	26	23	29	30	28	28	30	31	28	27	24	28	16	14	7	29	28	29	34	13	25	30	26	31	11	29	26	27	31	17	14	26	23	29	30	28	28	30
116066;116067;116068;116069;116070;116071;116072;116073;116074;116075;116076;116077;116078;116079;116080;116081;116082;116083;116084;116085;116086;116087;116088;116089;116090;116091;116092;116093;116094;116095;116096;116097;116098;116099;116100;116101;116102;116103;116104;116105;116106;116107;116108;116109;116110;116111;116112;116113;116114;116115;116116;116117;116118;116119;116120;116121;116122;…
;244618;244619;244620;244621;244622;244623;244624;244625;244626;244627;244628;244629;244630;244631;244632;244633;244634;244635;244636;244637;244638;244639;244640;244641;244642;244643;244644;244645;244646;244647;244648;244649;244650;244651;244652;244653;244654;244655;244656;244657;244658;244659;244660;244661;244662;244663;244664;244665;244666;244667;244668;244669;244670;244671;244672;244673;244674…	2854;4428;4432;7530;11249;16993;17245;33065;33070;60106;69914;74415;82845;89984;115831;116057;116362;157551;157587;158956;158990;189385;190449;196106;201179;218507;241224;241405;244374;249884;286221;298712;298984;312635;352079;379259;380498;399967	396	68;69;70;71;72		44	107;127;291;357;382
P08067	P08067	4	4	4	Cytochrome b-c1 complex subunit Rieske, mitochondrial	RIP1		1	4	4	4	1	1	2	1	3	3	2	3	2	2	2	1	2	2	0	2	2	2	1	2	2	2	2	1	2	2	2	2	3	1	1	1	1	2	1	3	3	2
P08417	P08417	6	6	6	Fumarate hydratase, mitochondrial	FUM1		1	6	6	6	1	1	1	0	2	2	2	0	2	2	2	0	1	3	1	0	1	1	0	0	1	2	1	0	1	0	1	1	0	0	0	1	1	1	0	2	2	2
P08431	P08431	14	14	14	Galactose-1-phosphate uridylyltransferase	GAL7		1	14	14	14	0	0	1	0	0	0	0	0	0	0	0	0	0	0	0	0	0	0	0	0	0	0	0	2	0	5	5	4	11	7	3	0	0	1	0	0	0	0
P08524	P08524	2	2	2	Farnesyl pyrophosphate synthase	ERG20		1	2	2	2	0	0	0	1	1	1	1	1	1	1	1	1	0	1	0	0	1	0	1	0	1	0	0	1	0	0	1	0	1	0	0	0	0	0	1	1	1	1
P08566	P08566	3	3	3	Pentafunctional AROM polypeptide;3-dehydroquinate synthase;3-phosphoshikimate 1-carboxyvinyltransferase;Shikimate kinase;3-dehydroquinate dehydratase;Shikimate dehydrogenase	ARO1		1	3	3	3	1	1	1	1	1	1	1	1	1	1	1	1	1	1	0	1	1	1	1	1	1	1	1	2	1	1	1	1	1	0	1	1	1	1	1	1	1	1
P08678	P08678	12	12	12	Adenylate cyclase	CYR1		1	12	12	12	0	2	3	5	1	3	3	4	2	2	2	5	6	8	7	2	2	2	4	2	2	1	2	3	3	1	2	2	3	4	3	0	2	3	5	1	3	3
P09201	P09201	5	5	5	Fructose-1,6-bisphosphatase	FBP1		1	5	5	5	0	0	0	0	2	0	3	0	1	1	4	0	0	2	0	0	0	0	0	0	1	1	1	0	3	0	1	1	0	0	1	0	0	0	0	2	0	3
P09232	P09232	14	14	14	Cerevisin	PRB1		1	14	14	14	2	2	5	2	4	4	6	7	4	6	6	4	2	7	2	6	6	6	2	3	6	6	4	5	5	3	6	6	4	3	5	2	2	5	2	4	4	6
P09436	P09436	2	2	2	Isoleucine--tRNA ligase, cytoplasmic	ILS1		1	2	2	2	1	0	0	1	0	0	0	1	0	0	0	0	0	0	0	0	0	0	0	0	0	0	0	1	0	0	0	0	1	0	0	1	0	0	1	0	0	0
P09457	P09457	5	5	5	ATP synthase subunit 5, mitochondrial	ATP5		1	5	5	5	0	0	0	0	0	0	1	0	1	1	1	0	0	3	1	0	0	1	0	0	2	1	0	1	1	1	0	1	0	0	0	0	0	0	0	0	0	1
P09620	P09620	1	1	1	Pheromone-processing carboxypeptidase KEX1	KEX1		1	1	1	1	1	1	1	1	1	1	1	1	1	1	1	1	0	0	0	1	1	0	1	0	1	1	1	1	0	1	1	0	1	0	0	1	1	1	1	1	1	1
P09624	P09624	24	24	24	Dihydrolipoyl dehydrogenase, mitochondrial	LPD1		1	24	24	24	17	11	14	6	17	16	16	9	14	16	14	9	10	7	3	16	13	12	15	11	14	15	11	15	8	12	12	11	16	4	10	17	11	14	6	17	16	16
P09733;P09734	P09733	3;1	3;1	3;1	Tubulin alpha-1 chain	TUB1		2	3	3	3	0	0	0	0	0	0	0	0	0	0	0	0	0	0	0	1	0	1	1	0	0	1	1	1	0	2	0	2	1	0	0	0	0	0	0	0	0	0
P09938	P09938	5	5	5	Ribonucleoside-diphosphate reductase small chain 1	RNR2		1	5	5	5	0	0	1	1	1	1	1	1	0	1	1	1	0	2	2	1	0	0	4	0	1	1	0	2	0	1	0	1	2	0	1	0	0	1	1	1	1	1
P0C0T4	P0C0T4	9	1	1	40S ribosomal protein S25-B	RPS25B		1	9	1	1	5	4	4	6	6	6	5	5	6	5	4	3	5	5	6	5	4	7	6	4	6	3	6	3	7	4	6	3	5	1	3	1	0	1	1	1	1	1
Q3E754;P0C0V8	Q3E754;P0C0V8	6;6	6;6	6;6	40S ribosomal protein S21-B;40S ribosomal protein S21-A	RPS21B;RPS21A	;	2	6	6	6	1	1	3	3	3	2	1	2	3	4	2	2	2	2	3	3	4	3	3	1	1	2	2	4	3	3	3	3	2	0	1	1	1	3	3	3	2	1
P0C0X0	P0C0X0	2	2	1	40S ribosomal protein S28-B	RPS28B		1	2	2	1	1	1	1	1	1	1	1	1	1	1	1	1	1	1	2	1	1	1	1	1	1	1	1	1	1	1	1	1	1	1	1	1	1	1	1	1	1	1
P0C2H6;P0C2H7	P0C2H6;P0C2H7	13;10	13;10	13;10	60S ribosomal protein L27-A;60S ribosomal protein L27-B	RPL27A;RPL27B	;	2	13	13	13	9	8	8	7	9	8	9	7	8	9	8	7	5	7	7	7	8	7	8	6	9	7	7	9	7	8	7	8	9	3	5	9	8	8	7	9	8	9
P0C2H8;P0C2H9	P0C2H8;P0C2H9	8;7	8;7	8;7	60S ribosomal protein L31-A;60S ribosomal protein L31-B	RPL31A;RPL31B	;	2	8	8	8	5	3	3	4	5	2	3	5	6	3	2	5	1	3	3	2	2	2	5	2	4	3	4	5	3	5	2	2	3	1	1	5	3	3	4	5	2	3
Q12501;Q12113;Q07791;Q03494;P25384;P0C2J3;Q12491;Q12472;P0CX64;P0CX63;Q99303;Q12439;Q12392;Q12293;Q12260;Q03483;P25383;P0C2J4;P0CX62;P0CX61	Q12501;Q12113;Q07791;Q03494;P25384;P0C2J3;Q12491;Q12472;P0CX64;P0CX63;Q99303;Q12439;Q12392;Q12293;Q12260;Q03483;P25383;P0C2J4;P0CX62;P0CX61	9;9;9;9;9;9;8;8;8;8;7;7;7;7;7;7;7;7;6;6	9;9;9;9;9;9;8;8;8;8;7;7;7;7;7;7;7;7;6;6	8;8;8;8;8;8;7;7;7;7;7;7;7;7;7;7;7;7;6;6	Transposon Ty2-OR2 Gag-Pol polyprotein;Capsid protein;Ty2 protease;Integrase;Reverse transcriptase/ribonuclease H;Transposon Ty2-OR1 Gag-Pol polyprotein;Capsid protein;Ty2 protease;Integrase;Reverse transcriptase/ribonuclease H;Transposon Ty2-DR3 Gag-Pol polyprotein;Capsid protein;Ty2 protease;Integrase;Reverse transcriptase/ribonuclease H;Transposon Ty2-DR2 Gag-Pol polyprotein;Capsid protein;Ty2…	TY2B-OR2;TY2B-OR1;TY2B-DR3;TY2B-DR2;TY2B-C;TY2B-LR1;TY2B-B;TY2B-DR1;TY2B-GR2;TY2B-F;TY2A-DR3;TY2A-OR1;TY2A-DR1;TY2A-OR2;TY2A-B;TY2A-DR2;TY2A-C;TY2A-LR1;TY2A-GR2;TY2A-F	;;;;;;;;;;;;;;;;;;;	20	9	9	8	5	4	7	5	5	5	6	4	6	5	5	3	1	1	0	5	3	5	3	2	3	4	4	3	2	3	4	5	4	0	2	5	4	7	5	5	5	6
P0C2J7;P47024	P0C2J7;P47024	5;5	5;5	3;3	Transposon Ty4-H Gag-Pol polyprotein;Capsid protein;Ty4 protease;Integrase;Reverse transcriptase/ribonuclease H;Transposon Ty4-J Gag-Pol polyprotein;Capsid protein;Ty4 protease;Integrase;Reverse transcriptase/ribonuclease H	TY4B-H;TY4B-J	;	2	5	5	3	2	1	2	2	0	0	2	0	1	1	0	2	1	2	1	2	2	2	2	1	3	1	1	2	1	3	4	2	2	0	1	2	1	2	2	0	0	2
P0CE41	P0CE41	3	3	3	Heme-responsive zinc finger transcription factor HAP1	HAP1		1	3	3	3	2	2	2	2	2	2	2	2	3	2	1	1	2	0	2	3	2	2	1	3	3	3	3	2	2	3	3	3	2	0	3	2	2	2	2	2	2	2
P0CH09;P0CH08	P0CH09;P0CH08	19;19	6;6	6;6	Ubiquitin-60S ribosomal protein L40;Ubiquitin;60S ribosomal protein L40	RPL40B;RPL40A	;	2	19	6	6	11	9	11	13	9	12	11	11	10	11	10	11	5	8	12	7	10	9	14	5	9	8	7	12	5	8	11	8	12	2	5	2	1	2	4	1	2	1
P0CT04	P0CT04	12	12	12	Protease B inhibitor 2	PBI2		1	12	12	12	9	4	10	7	10	9	8	7	7	8	6	7	10	4	7	6	6	7	10	5	4	7	5	7	5	3	4	6	6	1	4	9	4	10	7	10	9	8
P0CX24;P0CX23	P0CX24;P0CX23	14;14	14;14	14;14	60S ribosomal protein L20-B;60S ribosomal protein L20-A	RPL20B;RPL20A	;	2	14	14	14	8	8	8	9	9	8	9	9	7	10	10	7	4	6	10	10	9	8	10	5	9	9	7	9	7	10	8	8	8	2	6	8	8	8	9	9	8	9
P0CX26;P0CX25	P0CX26;P0CX25	2;2	2;2	2;2	60S ribosomal protein L43-B;60S ribosomal protein L43-A	RPL43B;RPL43A	;	2	2	2	2	1	0	1	0	2	2	2	2	2	2	2	2	2	1	1	2	2	2	2	2	2	2	2	2	2	2	2	2	2	2	2	1	0	1	0	2	2	2
P0CX28;P0CX27	P0CX28;P0CX27	9;9	9;9	9;9	60S ribosomal protein L42-B;60S ribosomal protein L42-A	RPL42B;RPL42A	;	2	9	9	9	5	3	5	6	5	7	4	3	5	6	7	4	2	1	5	5	6	4	3	4	7	3	6	3	4	5	5	5	5	1	3	5	3	5	6	5	7	4
P0CX30;P0CX29	P0CX30;P0CX29	9;9	9;9	9;9	40S ribosomal protein S23-B;40S ribosomal protein S23-A	RPS23B;RPS23A	;	2	9	9	9	0	0	1	3	1	1	1	3	1	2	1	1	0	7	4	1	1	1	3	1	1	1	1	2	2	2	1	1	1	0	0	0	0	1	3	1	1	1
P0CX32;P0CX31	P0CX32;P0CX31	7;7	7;7	7;7	40S ribosomal protein S24-B;40S ribosomal protein S24-A	RPS24B;RPS24A	;	2	7	7	7	4	3	3	3	4	3	1	3	3	2	3	0	0	4	2	3	3	1	5	2	2	3	3	0	1	4	4	1	1	0	1	4	3	3	3	4	3	1
P0CX34;P0CX33	P0CX34;P0CX33	5;5	5;5	5;5	40S ribosomal protein S30-B;40S ribosomal protein S30-A	RPS30B;RPS30A	;	2	5	5	5	0	0	1	3	2	1	1	3	1	0	1	3	1	2	2	2	1	1	3	3	2	1	2	2	1	1	1	1	3	1	1	0	0	1	3	2	1	1
P0CX36;P0CX35	P0CX36;P0CX35	18;18	18;18	18;18	40S ribosomal protein S4-B;40S ribosomal protein S4-A	RPS4B;RPS4A	;	2	18	18	18	10	9	13	8	10	10	11	10	10	9	11	7	7	8	9	10	10	10	13	5	9	10	9	12	7	9	10	8	8	1	5	10	9	13	8	10	10	11
P0CX38;P0CX37	P0CX38;P0CX37	6;6	6;6	6;6	40S ribosomal protein S6-B;40S ribosomal protein S6-A	RPS6B;RPS6A	;	2	6	6	6	0	0	0	0	2	2	2	1	1	2	2	1	0	4	1	0	0	2	0	0	1	1	0	0	2	0	2	2	0	0	1	0	0	0	0	2	2	2
P0CX40;P0CX39	P0CX40;P0CX39	16;16	16;16	16;16	40S ribosomal protein S8-B;40S ribosomal protein S8-A	RPS8B;RPS8A	;	2	16	16	16	5	8	6	8	7	8	9	8	6	9	9	6	3	6	6	6	8	7	7	4	7	6	4	7	5	7	6	8	7	2	4	5	8	6	8	7	8	9
P0CX42;P0CX41	P0CX42;P0CX41	4;4	4;4	4;4	60S ribosomal protein L23-B;60S ribosomal protein L23-A	RPL23B;RPL23A	;	2	4	4	4	2	2	1	2	2	2	1	2	2	1	1	1	2	1	1	2	2	2	3	1	3	1	2	2	1	2	1	1	3	0	1	2	2	1	2	2	2	1
P0CX44;P0CX43	P0CX44;P0CX43	7;7	7;7	7;7	60S ribosomal protein L1-B;60S ribosomal protein L1-A	RPL1B;RPL1A	;	2	7	7	7	3	1	2	2	2	0	0	3	3	1	2	3	2	5	2	0	0	1	5	0	3	1	1	3	2	2	1	0	0	0	2	3	1	2	2	2	0	0
P0CX46;P0CX45	P0CX46;P0CX45	24;24	24;24	24;24	60S ribosomal protein L2-B;60S ribosomal protein L2-A	RPL2B;RPL2A	;	2	24	24	24	16	17	20	17	15	17	20	18	16	17	18	12	11	4	6	13	16	16	17	10	15	12	14	17	9	14	15	14	18	10	9	16	17	20	17	15	17	20
434;330435;330436;330437;330438;330439;330440;330441;330442;330443;330444;330445;330446;330447;330448;330449;330450;330451;330452;330453;330454;330455;330456;330457;330458;330459;330460;330461;330462;330463;330464;330465;330466;330467;330468;330469;330470;330471;330472;330473;330474;330475;330476;330477;330478;330479;330480;330481;330482;330483;330484;330485;330486;330487;330488;330489;330490;330…	4718;24141;24800;48187;73041;94511;95590;97414;97610;150549;150551;171076;211335;211626;246973;254770;330661;332746;333247;364716;383956;397929;398306;398734	498;499	92		92;93	204
P0CX48;P0CX47	P0CX48;P0CX47	17;17	17;17	17;17	40S ribosomal protein S11-B;40S ribosomal protein S11-A	RPS11B;RPS11A	;	2	17	17	17	5	6	7	13	9	9	10	11	9	9	10	9	6	11	13	8	9	8	11	9	9	9	8	12	8	8	9	6	7	2	8	5	6	7	13	9	9	10
P0CX50;P0CX49	P0CX50;P0CX49	13;13	13;13	13;13	60S ribosomal protein L18-B;60S ribosomal protein L18-A	RPL18B;RPL18A	;	2	13	13	13	4	3	5	6	9	4	8	5	7	7	8	4	4	6	5	6	5	9	6	2	6	6	7	6	4	5	6	7	6	1	4	4	3	5	6	9	4	8
P0CX52;P0CX51	P0CX52;P0CX51	11;11	11;11	11;11	40S ribosomal protein S16-B;40S ribosomal protein S16-A	RPS16B;RPS16A	;	2	11	11	11	4	2	4	7	2	4	2	5	5	3	4	6	3	4	5	4	2	2	6	1	3	3	3	5	4	4	3	5	6	0	2	4	2	4	7	2	4	2
P0CX54;P0CX53	P0CX54;P0CX53	9;9	9;9	9;9	60S ribosomal protein L12-B;60S ribosomal protein L12-A	RPL12B;RPL12A	;	2	9	9	9	4	1	4	3	4	2	2	3	5	1	3	2	2	3	5	2	3	4	4	3	2	1	4	5	3	3	3	3	2	1	3	4	1	4	3	4	2	2
P0CX56;P0CX55	P0CX56;P0CX55	14;14	14;14	14;14	40S ribosomal protein S18-B;40S ribosomal protein S18-A	RPS18B;RPS18A	;	2	14	14	14	4	6	3	4	6	6	7	6	8	8	7	2	4	10	3	4	8	7	6	3	7	6	4	6	5	3	3	5	4	0	2	4	6	3	4	6	6	7
P0CX81;P0CX80	P0CX81;P0CX80	4;4	4;4	4;4	Copper metallothionein 1-2;Copper metallothionein 1-1	CUP1-2;CUP1-1	;	2	4	4	4	0	0	0	0	0	1	0	1	2	1	2	2	0	0	1	2	0	0	3	1	1	2	2	3	0	2	2	1	3	0	1	0	0	0	0	0	1	0
P0CX83;P0CX82	P0CX83;P0CX82	9;9	9;9	9;9	60S ribosomal protein L19-B;60S ribosomal protein L19-A	RPL19B;RPL19A	;	2	9	9	9	3	3	3	3	3	3	1	3	3	3	3	3	2	2	4	3	4	3	5	2	3	2	1	3	3	4	2	2	3	0	2	3	3	3	3	3	3	1
P0CX85;P0CX84	P0CX85;P0CX84	13;13	13;13	13;13	60S ribosomal protein L35-B;60S ribosomal protein L35-A	RPL35B;RPL35A	;	2	13	13	13	7	5	4	8	7	4	6	7	5	7	7	8	4	6	9	6	5	5	10	4	4	2	5	8	5	6	5	5	4	3	3	7	5	4	8	7	4	6
P0CY07;P0CY06	P0CY07;P0CY06	1;1	1;1	1;1	Silenced mating-type protein ALPHA1;Mating-type protein ALPHA1	HMLALPHA1;MATALPHA1	;	2	1	1	1	0	0	0	0	0	1	0	1	0	0	0	1	1	0	0	0	0	1	1	1	0	1	0	1	0	0	0	1	0	0	0	0	0	0	0	0	1	0
P10080	P10080	5	5	5	Single-stranded nucleic acid-binding protein	SBP1		1	5	5	5	0	0	0	2	1	0	0	1	0	0	1	1	1	2	2	1	0	0	2	1	2	1	1	1	0	1	2	1	2	0	0	0	0	0	2	1	0	0
P10081	P10081	7	7	7	ATP-dependent RNA helicase eIF4A	TIF1		1	7	7	7	0	0	0	1	1	1	1	3	1	1	3	3	0	2	2	1	1	0	3	0	1	1	1	3	1	1	1	1	1	0	2	0	0	0	1	1	1	1
P10363	P10363	4	4	4	DNA primase small subunit	PRI1		1	4	4	4	2	1	1	2	3	2	2	2	3	2	2	1	1	2	1	2	1	0	3	0	2	0	0	1	0	2	0	0	1	0	0	2	1	1	2	3	2	2
P10591;P09435	P10591	14;3	14;3	2;0	Heat shock protein SSA1	SSA1		2	14	14	2	2	3	2	4	3	5	5	2	3	3	4	2	0	6	4	1	5	4	5	1	6	4	2	5	2	4	7	5	3	0	2	2	3	2	4	3	5	5
P10592	P10592	14	2	2	Heat shock protein SSA2	SSA2		1	14	2	2	1	2	1	3	3	4	5	1	2	2	4	3	0	6	3	0	4	4	3	1	6	4	2	3	2	3	5	4	2	0	2	0	1	0	1	0	0	0
P10622	P10622	2	2	2	60S acidic ribosomal protein P1-beta	RPP1B		1	2	2	2	2	2	2	2	2	2	2	0	1	1	2	1	1	1	2	0	0	0	2	1	0	1	0	1	1	0	0	0	1	0	0	2	2	2	2	2	2	2
P10659	P10659	3	3	1	S-adenosylmethionine synthase 1	SAM1		1	3	3	1	0	0	0	0	1	1	2	0	1	2	2	0	0	1	0	0	2	2	0	2	2	2	1	0	2	0	1	2	0	0	2	0	0	0	0	1	1	2
P10664;P49626	P10664;P49626	9;8	9;8	9;8	60S ribosomal protein L4-A;60S ribosomal protein L4-B	RPL4A;RPL4B	;	2	9	9	9	4	2	4	3	3	4	5	4	5	4	5	2	1	6	4	3	5	3	5	2	4	4	2	2	3	4	4	4	2	2	3	4	2	4	3	3	4	5
P10869	P10869	1	1	1	Aspartokinase	HOM3		1	1	1	1	0	0	0	0	0	0	0	0	0	0	0	0	0	1	0	0	0	0	0	0	0	0	0	0	0	0	0	0	0	0	0	0	0	0	0	0	0	0
P10962	P10962	1	1	1	Protein MAK16	MAK16		1	1	1	1	1	0	0	0	0	0	0	0	0	0	0	0	0	1	0	0	0	0	0	0	0	0	0	0	0	0	0	0	0	0	0	1	0	0	0	0	0	0
P10963;REV__Q12532	P10963	41;1	41;1	41;1	Phosphoenolpyruvate carboxykinase [ATP]	PCK1		2	41	41	41	17	6	17	21	15	19	20	19	15	17	11	16	11	20	11	12	16	9	24	8	8	14	13	20	7	9	13	9	24	5	6	17	6	17	21	15	19	20
P10964	P10964	2	2	2	DNA-directed RNA polymerase I subunit RPA190	RPA190		1	2	2	2	0	0	0	0	1	0	0	0	1	0	0	1	0	1	0	0	0	0	0	0	0	0	0	0	0	1	0	0	0	0	0	0	0	0	0	1	0	0
P19146;P11076	P19146;P11076	1;1	1;1	1;1	ADP-ribosylation factor 2;ADP-ribosylation factor 1	ARF2;ARF1	;	2	1	1	1	0	0	0	1	0	1	0	1	1	0	1	1	0	0	0	0	0	0	1	0	0	1	0	1	0	0	0	0	1	0	0	0	0	0	1	0	1	0
P11154;P32327	P11154	10;4	10;4	10;4	Pyruvate carboxylase 1	PYC1		2	10	10	10	2	2	4	2	3	4	3	5	3	3	1	1	1	0	0	6	3	1	3	4	3	4	6	6	2	4	6	4	5	0	3	2	2	4	2	3	4	3
P11353	P11353	5	5	5	Oxygen-dependent coproporphyrinogen-III oxidase	HEM13		1	5	5	5	2	2	3	3	5	4	5	3	3	4	4	1	1	1	0	4	4	3	1	0	5	4	4	2	0	3	4	2	4	0	0	2	2	3	3	5	4	5
P11412	P11412	2	2	2	Glucose-6-phosphate 1-dehydrogenase	ZWF1		1	2	2	2	1	1	1	1	1	1	1	1	1	1	1	1	1	1	1	0	1	0	1	0	0	1	0	1	1	0	1	0	0	0	1	1	1	1	1	1	1	1
P11433	P11433	2	2	2	Cell division control protein 24	CDC24		1	2	2	2	0	1	1	1	1	1	1	1	1	1	1	0	2	1	0	1	1	1	1	1	1	1	0	1	1	1	1	1	1	0	1	0	1	1	1	1	1	1
P40150;P11484	P40150;P11484	13;13	13;13	13;13	Heat shock protein SSB2;Heat shock protein SSB1	SSB2;SSB1	;	2	13	13	13	1	1	2	1	0	1	3	1	1	1	2	1	1	8	2	2	1	1	3	0	0	1	0	2	1	0	1	2	0	0	0	1	1	2	1	0	1	3
P11491	P11491	7	7	7	Repressible alkaline phosphatase;Soluble alkaline phosphatase	PHO8		1	7	7	7	2	0	1	2	5	3	2	2	4	2	1	1	0	0	1	2	3	1	3	0	3	3	1	4	1	4	1	2	5	0	1	2	0	1	2	5	3	2
P11632	P11632	1	1	1	Non-histone chromosomal protein 6A	NHP6A		1	1	1	1	0	0	0	0	0	0	0	0	0	0	0	0	0	0	0	0	0	0	1	0	0	0	0	0	0	0	0	0	1	0	0	0	0	0	0	0	0	0
P11745	P11745	1	1	1	Ran GTPase-activating protein 1	RNA1		1	1	1	1	0	0	0	0	1	1	1	0	1	1	1	0	0	1	0	0	1	1	0	1	1	1	1	1	1	0	1	1	0	0	1	0	0	0	0	1	1	1
P11792	P11792	18	18	18	Serine/threonine-protein kinase SCH9	SCH9		1	18	18	18	6	9	9	11	4	5	5	4	4	5	5	3	4	5	6	3	4	3	4	1	3	3	4	8	1	2	4	2	9	0	1	6	9	9	11	4	5	5
P11938	P11938	10	10	10	DNA-binding protein RAP1	RAP1		1	10	10	10	1	2	2	1	2	2	3	2	1	1	1	1	0	4	4	5	1	2	2	0	3	3	2	1	1	3	2	5	2	0	0	1	2	2	1	2	2	3
P11978	P11978	41	41	41	Regulatory protein SIR4	SIR4		1	41	41	41	5	9	17	7	11	13	10	9	14	11	8	7	7	22	19	14	7	4	4	6	14	10	13	6	5	18	17	17	6	1	6	5	9	17	7	11	13	10
P11986	P11986	1	1	1	Inositol-3-phosphate synthase	INO1		1	1	1	1	0	0	0	0	1	1	1	0	1	1	1	0	0	0	0	1	1	1	0	0	1	1	1	0	0	1	1	1	0	0	0	0	0	0	0	1	1	1
P12383	P12383	4	4	4	Transcription factor PDR1	PDR1		1	4	4	4	3	3	2	1	2	1	2	2	2	2	2	3	1	1	2	3	2	1	3	1	3	2	1	1	0	2	2	2	1	0	0	3	3	2	1	2	1	2
P12612	P12612	1	1	1	T-complex protein 1 subunit alpha	TCP1		1	1	1	1	0	0	0	0	0	0	0	0	0	0	0	0	0	1	0	0	0	0	0	0	0	0	0	0	0	0	0	0	0	0	0	0	0	0	0	0	0	0
P12709	P12709	6	6	6	Glucose-6-phosphate isomerase	PGI1		1	6	6	6	2	2	3	3	2	2	2	3	2	2	2	2	1	3	3	2	1	2	3	1	1	1	2	4	1	2	2	1	2	1	1	2	2	3	3	2	2	2
P12887	P12887	1	1	1	Uracil-DNA glycosylase	UNG1		1	1	1	1	0	0	0	0	0	0	0	0	0	0	0	0	0	1	0	0	0	0	0	0	0	0	0	0	0	0	0	0	0	0	0	0	0	0	0	0	0	0
P12954	P12954	7	7	7	ATP-dependent DNA helicase SRS2	SRS2		1	7	7	7	0	0	0	0	4	4	3	1	4	4	4	2	4	5	5	5	4	4	4	3	4	4	4	3	2	4	5	4	2	1	2	0	0	0	0	4	4	3
P12962	P12962	9	9	9	Cap-associated protein CAF20	CAF20		1	9	9	9	5	7	6	9	4	6	6	8	6	6	4	7	2	3	3	4	3	4	7	1	5	5	2	8	2	3	3	3	7	2	1	5	7	6	9	4	6	6
P13099	P13099	2	2	2	DNA topoisomerase 3	TOP3		1	2	2	2	0	0	0	0	0	0	0	0	0	0	0	1	1	0	1	2	0	0	2	0	0	1	1	2	0	2	2	1	2	1	1	0	0	0	0	0	0	0
P13186	P13186	5	5	2	Serine/threonine-protein kinase KIN2	KIN2		1	5	5	2	0	0	0	1	1	1	0	1	1	1	0	1	1	1	0	2	1	0	1	1	1	1	0	2	2	2	1	1	2	0	0	0	0	0	1	1	1	0
P13382	P13382	2	2	2	DNA polymerase alpha catalytic subunit A	POL1		1	2	2	2	0	0	0	0	2	1	0	2	0	0	0	0	1	0	2	0	0	0	2	0	0	0	0	0	0	0	0	0	0	0	0	0	0	0	0	2	1	0
P13393	P13393	12	12	12	TATA-box-binding protein	SPT15		1	12	12	12	7	8	10	9	7	6	7	8	8	7	5	7	2	3	6	8	8	4	8	0	3	6	9	7	0	8	3	5	5	0	0	7	8	10	9	7	6	7
P13574	P13574	1	1	1	Protein STE12	STE12		1	1	1	1	1	1	1	1	0	0	0	0	0	0	0	0	0	0	1	0	0	0	0	0	0	0	0	0	0	0	0	0	0	0	0	1	1	1	1	0	0	0
P13663	P13663	1	1	1	Aspartate-semialdehyde dehydrogenase	HOM2		1	1	1	1	0	0	0	0	0	0	1	0	1	1	1	0	0	0	0	0	1	1	0	0	1	0	0	0	0	0	0	1	0	0	0	0	0	0	0	0	0	1
P13711	P13711	2	2	2	Acyl-coenzyme A oxidase	POX1		1	2	2	2	0	0	0	1	0	0	0	1	0	1	0	0	0	0	0	0	0	0	1	0	0	1	0	1	1	0	2	0	1	0	2	0	0	0	1	0	0	0
P13902	P13902	3	3	3	Protein INO4	INO4		1	3	3	3	1	1	0	0	0	0	0	0	0	0	1	0	0	1	2	0	1	0	0	0	0	1	0	0	0	1	0	0	1	0	0	1	1	0	0	0	0	0
P14020	P14020	1	1	1	Dolichol-phosphate mannosyltransferase	DPM1		1	1	1	1	0	0	0	0	0	0	0	0	0	0	0	0	1	0	0	0	0	0	0	0	0	0	0	0	0	0	0	0	0	0	0	0	0	0	0	0	0	0
P14064	P14064	1	1	1	Transcriptional activator HAP4	HAP4		1	1	1	1	0	0	0	0	0	0	0	0	0	0	0	0	0	1	0	0	0	0	0	0	0	0	0	0	0	0	0	0	0	0	0	0	0	0	0	0	0	0
P14120	P14120	9	9	9	60S ribosomal protein L30	RPL30		1	9	9	9	6	5	3	4	3	3	2	6	5	2	4	5	3	3	8	5	3	3	5	2	5	2	3	3	5	4	2	2	4	2	2	6	5	3	4	3	3	2
P14126	P14126	42	42	42	60S ribosomal protein L3	RPL3		1	42	42	42	27	26	30	25	19	22	25	22	14	18	15	19	23	18	24	17	21	15	22	10	14	16	16	20	13	17	13	12	26	14	11	27	26	30	25	19	22	25
75;386576;386577;386578;386579;386580;386581;386582;386583;386584;386585;386586;386587;386588;386589;386590;386591;386592;386593;386594;386595;386596;386597;386598;386599;386600;386601;386602;386603;386604;386605;386606;386607;386608;386609;386610;386611;386612;386613;386614;386615;386616;386617;386618;386619;386620;386621;386622;386623;386624;386625;386626;386627;386628;386629;386630;386631;3866…	5667;5678;7217;15680;15686;31352;60180;74844;74886;74887;81450;91230;91239;99790;100145;156871;170856;171054;183159;187052;222705;227288;251471;263763;291411;298030;323001;323471;323715;344004;344015;344030;344043;355424;359025;381399;385898;385900;386484;386497;389244;391184	654;655;656;657;658;659	103;104;105;106		66;357;367;376;384;385	53;214;308;380
P14164	P14164	40	40	40	ARS-binding factor 1	ABF1		1	40	40	40	21	21	28	26	20	16	21	20	21	23	24	19	13	9	21	21	21	18	25	12	23	21	20	25	11	22	22	25	24	10	13	21	21	28	26	20	16	21
P14291	P14291	35	35	35	Protein RED1	RED1		1	35	35	35	0	0	0	0	14	21	14	6	16	18	11	16	19	17	15	31	18	10	15	17	13	22	20	12	9	19	19	23	10	3	7	0	0	0	0	14	21	14
P14306	P14306	1	1	1	Carboxypeptidase Y inhibitor	TFS1		1	1	1	1	0	0	0	0	0	0	0	0	0	0	0	0	0	1	0	0	0	0	0	0	0	0	0	0	1	0	0	0	0	0	0	0	0	0	0	0	0	0
P14540	P14540	34	34	34	Fructose-bisphosphate aldolase	FBA1		1	34	34	34	15	12	16	14	21	17	16	21	20	18	16	12	14	17	8	15	18	12	20	8	11	14	15	16	8	13	12	11	18	6	8	15	12	16	14	21	17	16
P14742	P14742	9	9	9	Glutamine--fructose-6-phosphate aminotransferase [isomerizing]	GFA1		1	9	9	9	2	3	2	3	3	3	4	4	1	2	1	0	3	2	2	4	2	1	3	1	2	3	4	6	0	4	4	4	3	2	1	2	3	2	3	3	3	4
P14832	P14832	14	14	12	Peptidyl-prolyl cis-trans isomerase	CPR1		1	14	14	12	6	6	8	6	8	4	6	9	7	8	8	8	4	7	8	6	8	6	9	3	6	7	7	10	7	5	7	6	7	4	6	6	6	8	6	8	4	6
P14904	P14904	3	3	3	Vacuolar aminopeptidase 1	APE1		1	3	3	3	0	0	0	1	0	0	0	1	0	0	0	0	0	2	0	0	0	0	1	0	0	0	0	1	1	0	0	0	1	0	0	0	0	0	1	0	0	0
P14922	P14922	3	3	3	General transcriptional corepressor CYC8	CYC8		1	3	3	3	0	1	2	2	1	0	1	2	2	0	1	1	0	2	2	1	1	0	3	0	2	1	0	1	0	1	1	0	1	0	0	0	1	2	2	1	0	1
P15019	P15019	2	2	2	Transaldolase	TAL1		1	2	2	2	0	0	0	0	0	0	0	0	0	0	0	1	0	1	0	0	0	0	2	0	0	0	0	1	0	0	0	0	1	0	0	0	0	0	0	0	0	0
P15108	P15108	14	14	5	ATP-dependent molecular chaperone HSC82	HSC82		1	14	14	5	3	2	7	5	3	3	3	5	6	5	3	5	2	8	6	5	5	4	6	4	4	5	6	7	3	6	7	6	6	0	2	3	2	7	5	3	3	3
P15180	P15180	3	3	3	Lysine--tRNA ligase, cytoplasmic	KRS1		1	3	3	3	0	1	1	2	1	0	1	3	1	2	1	2	0	0	1	1	1	0	2	0	1	0	0	2	0	0	1	0	2	0	0	0	1	1	2	1	0	1
P15202	P15202	8	8	8	Peroxisomal catalase A	CTA1		1	8	8	8	2	2	3	3	4	4	4	6	4	3	2	5	3	0	3	5	5	3	7	2	5	5	5	6	2	5	5	5	5	1	2	2	2	3	3	4	4	4
P15274	P15274	30	30	30	AMP deaminase	AMD1		1	30	30	30	20	22	18	23	9	11	7	12	12	12	7	13	6	8	3	10	7	4	14	4	7	14	9	17	3	10	13	7	15	2	5	20	22	18	23	9	11	7
P15424	P15424	1	1	1	ATP-dependent RNA helicase MSS116, mitochondrial	MSS116		1	1	1	1	0	0	0	0	0	0	0	0	0	0	0	0	0	1	0	0	0	0	0	0	0	0	0	0	0	0	0	0	0	0	0	0	0	0	0	0	0	0
P15436	P15436	2	2	1	DNA polymerase delta catalytic subunit	POL3		1	2	2	1	1	1	0	1	1	0	1	0	1	1	0	0	0	0	0	0	1	1	1	0	1	1	0	1	0	0	0	1	0	0	0	1	1	0	1	1	0	1
P15454	P15454	1	1	1	Guanylate kinase	GUK1		1	1	1	1	0	0	0	0	0	0	0	0	0	0	0	0	0	0	0	0	0	0	1	0	0	0	0	0	0	0	0	0	0	0	0	0	0	0	0	0	0	0
P15496	P15496	1	1	1	Isopentenyl-diphosphate Delta-isomerase	IDI1		1	1	1	1	0	0	0	0	0	0	0	0	0	0	0	0	0	0	0	0	0	0	0	0	1	0	0	0	1	0	0	0	0	0	1	0	0	0	0	0	0	0
P15624	P15624	1	1	1	Phenylalanine--tRNA ligase beta subunit	FRS1		1	1	1	1	0	0	0	0	0	0	0	0	1	1	0	1	0	0	0	1	1	1	1	0	1	0	1	1	0	1	1	0	0	0	1	0	0	0	0	0	0	0
P15703	P15703	3	3	3	Glucan 1,3-beta-glucosidase	BGL2		1	3	3	3	1	0	0	1	1	2	2	2	2	3	3	0	0	0	1	2	2	2	1	0	1	3	1	1	0	1	2	3	0	0	0	1	0	0	1	1	2	2
P15705	P15705	1	1	1	Heat shock protein STI1	STI1		1	1	1	1	0	0	0	0	0	0	1	0	0	1	1	0	0	1	0	0	0	1	0	0	1	1	0	0	1	0	1	1	0	0	0	0	0	0	0	0	0	1
P15731	P15731	2	1	1	Ubiquitin-conjugating enzyme E2 4	UBC4		1	2	1	1	1	1	1	1	0	0	0	1	0	1	0	1	0	0	1	0	0	0	2	0	0	0	0	1	0	0	0	0	1	0	0	0	1	0	0	0	0	0
P15732	P15732	2	2	1	Ubiquitin-conjugating enzyme E2-16 kDa	UBC5		1	2	2	1	1	0	1	1	0	0	0	1	0	2	0	1	0	0	1	0	0	1	1	0	1	1	0	1	1	0	0	1	1	0	0	1	0	1	1	0	0	0
P15807	P15807	1	1	1	Siroheme biosynthesis protein MET8;Precorrin-2 dehydrogenase;Sirohydrochlorin ferrochelatase	MET8		1	1	1	1	0	0	0	0	0	0	0	0	0	0	0	0	0	0	0	1	1	0	0	1	1	0	1	1	0	1	1	0	0	0	0	0	0	0	0	0	0	0
P15873	P15873	16	16	16	Proliferating cell nuclear antigen	POL30		1	16	16	16	5	6	8	6	9	11	10	9	9	13	9	8	4	4	7	11	9	11	9	5	8	9	8	8	4	7	9	7	6	3	3	5	6	8	6	9	11	10
78;166979;166980;166981;166982;166983;166984;166985;166986;166987;166988;166989;166990;166991;166992;166993;166994;166995;166996;166997;166998;166999;167000;167001;167002;167003;167004;167005;167006;167007;167008;167009;167010;167011;167012;167013;167014;167015;167016;167017;167018;167019;167020;167021;167022;167023;167024;167025;167026;167027;167028;167029;167030;167031;167032;167033;167034;1670…	31233;65633;65635;66270;95360;155451;162346;163319;165312;204335;204799;204991;209394;289641;334632;400734	745;746;747;748	116;117	198;199	127;164;168;183	119;161	163;166
P15891	P15891	3	3	3	Actin-binding protein	ABP1		1	3	3	3	0	0	1	1	0	0	0	0	0	0	0	1	0	2	1	1	0	0	2	0	1	0	0	1	0	1	0	1	0	0	0	0	0	1	1	0	0	0
P16370	P16370	1	1	1	DNA-directed RNA polymerase II subunit RPB3	RPB3		1	1	1	1	0	0	0	0	0	0	0	0	0	0	0	0	0	0	1	0	0	0	0	0	0	0	0	0	0	0	0	0	0	0	0	0	0	0	0	0	0	0
P16387	P16387	2	2	2	Pyruvate dehydrogenase E1 component subunit alpha, mitochondrial	PDA1		1	2	2	2	0	0	0	0	0	0	1	0	0	0	0	0	0	2	0	0	0	0	0	0	0	0	0	0	0	0	0	0	0	0	0	0	0	0	0	0	0	1
P16467	P16467	3	2	2	Pyruvate decarboxylase isozyme 2	PDC5		1	3	2	2	0	0	0	1	1	0	0	1	1	0	1	1	0	1	1	0	0	1	1	0	0	0	0	1	0	0	0	0	1	0	0	0	0	0	1	1	0	0
P16521	P16521	2	2	2	Elongation factor 3A	YEF3		1	2	2	2	0	0	0	0	0	0	0	0	0	0	0	0	0	2	0	0	0	0	0	0	0	0	0	0	0	0	0	0	0	0	0	0	0	0	0	0	0	0
P16649	P16649	11	11	11	General transcriptional corepressor TUP1	TUP1		1	11	11	11	6	7	7	5	7	4	5	2	6	3	5	3	3	4	6	3	6	5	9	2	6	1	3	4	0	6	5	4	5	0	1	6	7	7	5	7	4	5
P16861	P16861	1	1	1	ATP-dependent 6-phosphofructokinase subunit alpha	PFK1		1	1	1	1	0	0	0	0	1	1	1	0	1	1	0	0	0	1	0	0	1	0	0	0	1	1	1	0	1	1	1	1	0	0	1	0	0	0	0	1	1	1
P16862	P16862	1	1	1	ATP-dependent 6-phosphofructokinase subunit beta	PFK2		1	1	1	1	0	0	0	1	0	0	0	1	0	0	0	1	0	0	0	0	0	0	1	0	0	0	0	1	0	0	0	0	0	0	0	0	0	0	1	0	0	0
P16965	P16965	5	5	5	ATPase-stabilizing factor 15 kDa protein	STF2		1	5	5	5	3	2	3	2	2	3	2	2	3	1	2	2	1	0	4	3	2	2	2	2	2	2	1	1	1	1	1	1	1	0	0	3	2	3	2	2	3	2
P17076;P29453	P17076;P29453	16;14	16;14	16;14	60S ribosomal protein L8-A;60S ribosomal protein L8-B	RPL8A;RPL8B	;	2	16	16	16	5	5	6	6	6	6	4	6	6	7	5	3	5	7	9	4	4	4	7	3	5	5	3	5	5	6	4	3	6	2	2	5	5	6	6	6	6	4
P17106	P17106	7	7	7	Centromere-binding protein 1	CBF1		1	7	7	7	3	3	5	4	3	2	4	3	3	4	3	3	1	3	5	2	3	2	3	1	2	3	1	3	0	1	2	3	2	0	1	3	3	5	4	3	2	4
P17157	P17157	7	7	7	Cyclin-dependent protein kinase PHO85	PHO85		1	7	7	7	3	3	4	0	4	3	3	2	2	2	2	4	2	2	1	4	3	2	4	2	3	1	3	6	2	4	2	1	4	2	2	3	3	4	0	4	3	3
P17255	P17255	1	1	1	V-type proton ATPase catalytic subunit A;Endonuclease PI-SceI	VMA1		1	1	1	1	0	0	0	0	0	0	0	0	0	0	0	0	0	0	1	0	0	0	0	0	0	1	0	0	1	0	1	1	0	0	1	0	0	0	0	0	0	0
P17505	P17505	4	4	4	Malate dehydrogenase, mitochondrial	MDH1		1	4	4	4	1	0	1	1	1	1	2	1	3	2	2	1	0	1	1	1	1	2	0	1	2	1	2	1	1	0	0	2	1	0	1	1	0	1	1	1	1	2
P17536	P17536	2	2	2	Tropomyosin-1	TPM1		1	2	2	2	1	1	1	2	2	1	2	1	1	1	2	2	1	1	1	2	1	1	2	0	0	1	1	1	1	2	2	1	2	0	2	1	1	1	2	2	1	2
P17709	P17709	7	7	7	Glucokinase-1	GLK1		1	7	7	7	1	0	1	2	3	2	3	3	3	2	2	1	2	2	0	2	3	2	3	1	3	4	3	2	3	1	3	2	2	1	2	1	0	1	2	3	2	3
P17891	P17891	6	6	6	Clathrin light chain	CLC1		1	6	6	6	1	0	1	1	1	0	1	2	2	0	1	1	0	0	2	0	0	1	5	0	2	1	1	1	0	2	0	1	0	0	0	1	0	1	1	1	0	1
P17967	P17967	3	3	3	Protein disulfide-isomerase	PDI1		1	3	3	3	0	0	0	0	0	0	1	0	1	0	1	0	0	1	1	0	0	1	0	1	1	1	1	0	1	1	1	1	0	0	0	0	0	0	0	0	0	1
P18239;P18238	P18239	16;1	16;1	16;1	ADP,ATP carrier protein 2	PET9		2	16	16	16	6	8	8	6	9	10	9	5	9	7	7	3	5	10	3	8	9	6	7	5	7	6	7	4	7	7	7	5	4	3	3	6	8	8	6	9	10	9
P18412	P18412	14	14	14	Ty transcription activator TEC1	TEC1		1	14	14	14	13	12	12	8	3	2	1	3	4	4	1	1	0	1	6	1	1	1	2	0	1	1	1	1	0	1	0	1	1	0	0	13	12	12	8	3	2	1
P18544	P18544	2	2	2	Acetylornithine aminotransferase, mitochondrial	ARG8		1	2	2	2	0	0	0	0	1	1	1	0	1	1	1	0	0	1	1	0	1	1	0	0	0	1	0	0	0	0	0	0	0	0	0	0	0	0	0	1	1	1
P18562	P18562	2	2	2	Uracil phosphoribosyltransferase	FUR1		1	2	2	2	0	0	0	0	0	0	0	0	0	0	0	0	0	2	0	0	0	0	0	0	0	0	0	0	0	0	0	0	0	0	0	0	0	0	0	0	0	0
P18961;P12688	P18961	23;2	23;2	23;2	Serine/threonine-protein kinase YPK2/YKR2	YPK2		2	23	23	23	11	14	17	17	8	10	11	6	6	8	9	8	6	8	5	6	8	9	8	5	5	6	8	7	4	5	11	9	4	0	6	11	14	17	17	8	10	11
P19097	P19097	6	6	6	Fatty acid synthase subunit alpha;Acyl carrier;3-oxoacyl-[acyl-carrier-protein] reductase;3-oxoacyl-[acyl-carrier-protein] synthase	FAS2		1	6	6	6	0	1	0	2	2	1	1	3	1	1	2	1	0	3	1	2	2	1	1	0	2	1	1	2	1	1	2	0	3	0	1	0	1	0	2	2	1	1
P19263	P19263	1	1	1	Mediator of RNA polymerase II transcription subunit 14	RGR1		1	1	1	1	1	1	1	1	0	0	0	0	1	0	0	1	1	0	1	0	0	0	1	0	0	0	0	0	0	1	0	0	1	0	0	1	1	1	1	0	0	0
P19414	P19414	4	4	4	Aconitate hydratase, mitochondrial	ACO1		1	4	4	4	0	0	0	0	2	1	2	1	2	3	1	0	0	1	0	0	1	1	0	0	2	2	1	1	0	0	1	1	0	0	0	0	0	0	0	2	1	2
P19658	P19658	2	2	2	Exocyst complex component EXO70	EXO70		1	2	2	2	0	0	0	0	0	0	0	0	0	0	0	0	0	1	0	0	0	0	1	0	0	0	0	1	0	0	0	0	0	0	0	0	0	0	0	0	0	0
P19659	P19659	3	3	3	Mediator of RNA polymerase II transcription subunit 15	GAL11		1	3	3	3	2	2	1	1	1	1	1	1	1	1	1	0	2	1	2	0	1	1	2	0	1	1	1	0	0	1	1	1	2	0	0	2	2	1	1	1	1	1
P19812	P19812	1	1	1	E3 ubiquitin-protein ligase UBR1	UBR1		1	1	1	1	0	0	0	0	0	1	0	0	0	1	0	0	0	0	0	0	0	1	0	0	0	0	0	0	0	0	1	0	0	0	0	0	0	0	0	0	1	0
P20050	P20050	23	23	23	Meiosis-specific protein HOP1	HOP1		1	23	23	23	0	0	0	3	16	16	12	11	18	15	12	13	10	10	16	17	15	13	8	8	10	14	14	9	6	16	13	13	10	1	5	0	0	0	3	16	16	12
P20433	P20433	1	1	1	DNA-directed RNA polymerase II subunit RPB4	RPB4		1	1	1	1	1	1	1	1	0	1	1	0	1	0	0	1	0	0	0	1	1	0	1	0	1	1	0	1	0	1	0	0	0	0	0	1	1	1	1	0	1	1
P20434	P20434	2	2	2	DNA-directed RNA polymerases I, II, and III subunit RPABC1	RPB5		1	2	2	2	1	0	0	1	0	0	0	2	0	1	0	1	0	0	0	0	0	0	2	0	0	0	0	2	0	0	0	0	2	0	0	1	0	0	1	0	0	0
P20435	P20435	5	5	5	DNA-directed RNA polymerases I, II, and III subunit RPABC2	RPO26		1	5	5	5	3	3	4	3	3	3	3	4	2	2	4	3	0	0	3	3	2	2	4	0	3	3	3	1	0	2	1	3	1	0	0	3	3	4	3	3	3	3
P20457	P20457	1	1	1	DNA primase large subunit	PRI2		1	1	1	1	0	0	0	0	1	0	0	0	0	0	0	0	0	0	1	0	0	0	0	0	0	0	0	0	0	0	0	0	0	0	0	0	0	0	0	1	0	0
P20484	P20484	1	1	1	Protein MAK11	MAK11		1	1	1	1	0	0	0	1	0	0	1	0	0	0	0	0	0	0	0	0	0	0	1	0	0	1	0	1	0	0	0	0	0	0	0	0	0	0	1	0	0	1
P20486	P20486	5	5	5	Cyclin-dependent kinases regulatory subunit	CKS1		1	5	5	5	3	4	2	1	3	4	2	1	0	1	0	1	1	0	0	4	3	0	1	1	0	2	2	2	0	4	3	1	4	1	0	3	4	2	1	3	4	2
P20967	P20967	11	11	11	2-oxoglutarate dehydrogenase, mitochondrial	KGD1		1	11	11	11	3	4	4	3	4	5	8	2	4	5	4	3	6	5	1	4	3	4	3	2	3	4	2	3	2	3	5	3	3	2	3	3	4	4	3	4	5	8
P21147	P21147	2	2	2	Acyl-CoA desaturase 1	OLE1		1	2	2	2	0	0	1	1	0	0	2	0	0	0	0	0	0	2	0	0	0	0	0	0	0	0	0	0	0	0	0	0	0	0	0	0	0	1	1	0	0	2
P21242	P21242	1	1	1	Probable proteasome subunit alpha type-7	PRE10		1	1	1	1	0	0	0	0	0	0	1	0	1	1	1	0	0	0	0	1	1	1	0	1	1	1	1	0	1	1	1	1	0	0	1	0	0	0	0	0	0	1
P21243	P21243	1	1	1	Proteasome subunit alpha type-1	SCL1		1	1	1	1	0	0	0	0	0	0	0	0	0	0	0	0	0	1	0	0	0	0	0	0	0	0	0	0	0	0	0	0	0	0	0	0	0	0	0	0	0	0
P21268	P21268	2	2	2	Cyclin-dependent kinase inhibitor FAR1	FAR1		1	2	2	2	0	1	1	1	1	1	1	1	1	1	1	1	1	1	0	1	1	1	1	0	1	1	1	1	0	1	1	1	1	0	0	0	1	1	1	1	1	1
P21304	P21304	1	1	1	Periodic tryptophan protein 1	PWP1		1	1	1	1	0	0	0	0	0	0	0	0	0	0	0	0	0	0	0	0	0	1	0	0	0	0	0	0	0	1	0	0	1	0	0	0	0	0	0	0	0	0
P21306	P21306	1	1	1	ATP synthase subunit epsilon, mitochondrial	ATP15		1	1	1	1	0	0	0	0	0	0	0	0	0	0	0	0	0	1	0	0	0	0	0	0	0	0	0	0	1	0	0	0	0	0	0	0	0	0	0	0	0	0
P21524	P21524	4	4	4	Ribonucleoside-diphosphate reductase large chain 1	RNR1		1	4	4	4	1	2	1	3	3	3	3	3	3	3	2	1	2	2	2	3	3	2	1	2	2	3	2	1	2	3	3	2	1	0	2	1	2	1	3	3	3	3
P21538	P21538	10	10	10	DNA-binding protein REB1	REB1		1	10	10	10	4	4	4	2	1	2	2	3	2	1	2	3	3	8	6	3	1	2	5	0	4	2	2	3	0	4	5	3	3	0	0	4	4	4	2	1	2	2
P21560	P21560	1	1	1	Protein CBP3, mitochondrial	CBP3		1	1	1	1	0	0	1	1	0	1	0	0	1	1	1	0	0	1	1	0	0	0	0	1	0	0	0	0	0	0	0	0	0	0	0	0	0	1	1	0	1	0
P21651	P21651	17	17	17	Recombination protein 107	REC107		1	17	17	17	0	0	0	1	8	6	8	9	11	12	9	11	8	9	10	8	6	4	9	3	4	5	4	6	1	5	5	4	3	1	1	0	0	0	1	8	6	8
P21691	P21691	2	2	2	Regulatory protein SIR1	SIR1		1	2	2	2	1	1	1	1	1	1	1	1	1	1	1	0	0	0	1	2	1	0	1	0	1	2	1	1	0	2	2	2	1	0	0	1	1	1	1	1	1	1
P21801	P21801	3	3	3	Succinate dehydrogenase [ubiquinone] iron-sulfur subunit, mitochondrial	SDH2		1	3	3	3	1	1	1	1	2	2	1	2	2	2	2	1	1	0	1	2	2	2	1	0	2	2	2	1	0	2	1	2	1	0	0	1	1	1	1	2	2	1
P21954	P21954	3	3	3	Isocitrate dehydrogenase [NADP], mitochondrial	IDP1		1	3	3	3	0	0	0	0	1	0	2	0	0	1	2	0	0	1	0	0	0	1	0	0	0	2	0	0	0	0	0	0	0	0	1	0	0	0	0	1	0	2
P22082	P22082	1	1	1	Transcription regulatory protein SNF2	SNF2		1	1	1	1	0	0	0	0	0	0	0	0	0	0	0	0	0	1	0	0	0	0	0	0	0	0	0	0	0	0	0	0	0	0	0	0	0	0	0	0	0	0
P22133	P22133	15	15	15	Malate dehydrogenase, cytoplasmic	MDH2		1	15	15	15	4	6	4	6	4	6	5	9	6	7	6	4	6	6	2	7	7	2	8	2	5	6	6	6	2	6	6	4	8	5	2	4	6	4	6	4	6	5
P22134	P22134	1	1	1	DNA-3-methyladenine glycosylase	MAG1		1	1	1	1	0	0	0	1	0	0	0	1	1	1	0	1	1	0	1	1	0	0	1	1	1	1	1	1	1	1	1	1	1	0	1	0	0	0	1	0	0	0
P22138	P22138	2	2	2	DNA-directed RNA polymerase I subunit RPA135	RPA135		1	2	2	2	1	2	1	0	1	1	0	0	0	0	0	0	0	0	0	0	0	0	0	0	0	0	0	0	0	0	0	0	0	0	0	1	2	1	0	1	1	0
P22141	P22141	2	2	2	Proteasome subunit beta type-4	PRE1		1	2	2	2	0	0	0	0	0	0	0	0	0	0	0	0	0	0	0	0	0	0	0	0	1	1	0	0	1	0	0	2	0	0	1	0	0	0	0	0	0	0
P22147	P22147	1	1	1	5-3 exoribonuclease 1	XRN1		1	1	1	1	0	0	0	1	0	0	0	1	0	0	0	1	0	0	0	0	0	0	1	0	0	0	0	0	0	0	0	0	1	0	0	0	0	0	1	0	0	0
P22148	P22148	4	4	4	Protein MSN1	MSN1		1	4	4	4	2	2	2	2	2	2	1	2	2	1	1	1	1	2	0	0	1	0	2	0	0	0	1	1	0	0	0	0	1	0	0	2	2	2	2	2	2	1
P22149	P22149	3	3	3	Iron-regulated transcriptional activator AFT1	AFT1		1	3	3	3	1	0	0	1	0	0	1	1	0	0	0	1	0	2	0	0	0	0	1	0	0	0	0	1	0	0	0	0	1	0	0	1	0	0	1	0	0	1
P22202	P22202	6	1	1	Heat shock protein SSA4	SSA4		1	6	1	1	1	0	0	1	2	3	3	1	1	2	2	1	0	3	1	0	3	3	2	0	4	3	1	2	0	1	4	4	2	0	1	0	0	0	0	0	0	0
P22211	P22211	8	8	8	Nitrogen permease reactivator protein	NPR1		1	8	8	8	1	2	4	4	2	2	2	1	1	1	1	1	3	0	0	1	2	2	1	0	3	1	3	3	0	2	3	2	3	0	0	1	2	4	4	2	2	2
P22217	P22217	5	5	5	Thioredoxin-1	TRX1		1	5	5	5	4	2	3	2	2	1	1	3	1	2	1	3	1	2	0	0	2	1	3	1	2	3	1	3	1	2	1	1	2	0	1	4	2	3	2	2	1	1
P22276	P22276	1	1	1	DNA-directed RNA polymerase III subunit RPC2	RET1		1	1	1	1	0	0	0	0	0	0	0	0	0	0	0	0	0	1	0	0	0	0	0	0	0	0	0	0	0	0	0	0	0	0	0	0	0	0	0	0	0	0
P22336	P22336	5	5	5	Replication factor A protein 1	RFA1		1	5	5	5	0	0	0	0	0	0	0	1	1	1	1	1	1	1	4	4	2	2	3	1	2	3	3	5	1	5	3	4	1	0	1	0	0	0	0	0	0	0
P22434	P22434	2	2	2	3,5-cyclic-nucleotide phosphodiesterase 1	PDE1		1	2	2	2	0	0	0	0	0	0	0	1	0	0	0	1	0	0	0	0	0	0	1	0	0	0	0	1	0	0	0	0	2	0	0	0	0	0	0	0	0	0
P22438	P22438	1	1	1	Methionine--tRNA ligase, mitochondrial	MSM1		1	1	1	1	0	0	0	1	0	0	1	1	0	1	0	0	0	0	0	0	0	0	1	0	0	0	0	1	0	0	0	0	0	0	0	0	0	0	1	0	0	1
P22579	P22579	2	2	2	Transcriptional regulatory protein SIN3	SIN3		1	2	2	2	0	0	1	0	0	0	0	0	0	0	0	0	0	1	0	0	0	0	0	0	0	0	0	0	0	1	1	0	0	0	0	0	0	1	0	0	0	0
P22696	P22696	6	6	6	Peptidyl-prolyl cis-trans isomerase ESS1	ESS1		1	6	6	6	2	2	1	2	1	1	3	2	1	1	1	1	4	2	1	1	1	1	3	1	1	1	1	3	1	1	1	2	4	0	1	2	2	1	2	1	1	3
P22768	P22768	2	2	2	Argininosuccinate synthase	ARG1		1	2	2	2	0	0	0	0	1	1	1	0	1	0	1	0	0	1	0	0	0	1	0	0	0	0	0	0	0	0	0	0	0	0	0	0	0	0	0	1	1	1
P22803	P22803	5	5	5	Thioredoxin-2	TRX2		1	5	5	5	1	0	1	1	0	1	1	1	2	0	0	1	2	0	1	0	0	0	4	0	0	1	1	2	0	1	1	0	0	0	0	1	0	1	1	0	1	1
P22855	P22855	6	6	6	Alpha-mannosidase	AMS1		1	6	6	6	0	1	0	2	1	2	3	3	2	2	2	1	1	4	0	2	2	2	2	0	2	3	2	3	1	2	3	3	3	0	1	0	1	0	2	1	2	3
P22943	P22943	17	17	17	12 kDa heat shock protein	HSP12		1	17	17	17	14	14	15	14	12	13	12	14	14	15	11	12	12	8	15	14	15	14	16	13	14	12	15	14	7	13	14	12	14	6	10	14	14	15	14	12	13	12
P23180	P23180	1	1	1	Probable oxidoreductase AIM17	AIM17		1	1	1	1	0	0	0	0	0	0	1	1	0	1	0	0	0	0	0	0	0	0	0	0	0	1	0	1	0	0	0	1	0	0	0	0	0	0	0	0	0	1
P23248	P23248	20	20	11	40S ribosomal protein S1-B	RPS1B		1	20	20	11	12	11	12	10	10	9	9	11	13	7	8	11	7	7	12	12	9	10	13	5	10	9	11	10	8	11	7	9	9	1	4	12	11	12	10	10	9	9
P23254	P23254	2	2	2	Transketolase 1	TKL1		1	2	2	2	0	0	0	0	0	0	1	0	0	0	0	0	0	2	0	0	0	0	0	0	0	0	0	0	0	0	0	0	0	0	0	0	0	0	0	0	0	1
P23287;P14747	P23287;P14747	2;1	2;1	2;1	Serine/threonine-protein phosphatase 2B catalytic subunit A1;Serine/threonine-protein phosphatase 2B catalytic subunit A2	CNA1;CMP2	;	2	2	2	2	0	1	0	1	0	1	1	2	0	0	0	1	1	0	0	0	0	1	0	0	0	0	0	1	0	0	0	0	2	0	0	0	1	0	1	0	1	1
P23292;P23291	P23292	13;3	13;3	13;3	Casein kinase I homolog 2	YCK2		2	13	13	13	7	7	8	10	6	7	10	4	6	6	7	2	0	3	5	6	8	5	4	2	6	7	8	4	2	8	10	10	6	1	5	7	7	8	10	6	7	10
P23301;P19211	P23301	18;3	18;3	18;3	Eukaryotic translation initiation factor 5A-1	HYP2		2	18	18	18	9	6	7	7	9	8	10	8	9	9	10	7	6	11	8	7	7	8	10	6	9	7	9	7	8	8	8	9	9	4	5	9	6	7	7	9	8	10
P23337	P23337	8	6	6	Glycogen [starch] synthase isoform 1	GSY1		1	8	6	6	6	6	6	6	4	7	4	3	5	4	3	5	3	2	2	6	6	5	4	4	4	6	5	5	4	6	5	4	6	2	4	4	4	4	4	2	5	3
P23493	P23493	1	1	1	Mitochondrial biogenesis regulation protein 1	MBR1		1	1	1	1	1	1	1	1	0	0	0	1	1	0	0	0	0	0	1	1	0	0	1	0	1	0	0	1	0	1	0	0	1	0	0	1	1	1	1	0	0	0
P23542	P23542	4	4	4	Aspartate aminotransferase, cytoplasmic	AAT2		1	4	4	4	0	0	0	0	0	2	2	0	0	2	0	0	0	1	0	0	1	1	0	1	2	2	0	0	1	0	2	2	0	0	0	0	0	0	0	0	2	2
P23641	P23641	3	3	3	Mitochondrial phosphate carrier protein;Mitochondrial phosphate carrier protein, N-terminally processed	MIR1		1	3	3	3	0	0	0	0	1	1	3	1	1	1	1	0	0	3	1	0	1	1	2	1	0	2	0	2	1	0	1	0	1	0	0	0	0	0	0	1	1	3
P23724	P23724	2	2	2	Proteasome subunit beta type-6	PRE7		1	2	2	2	0	1	1	0	0	1	2	0	0	2	1	0	0	1	0	0	1	1	0	1	2	2	1	0	2	0	1	1	0	0	2	0	1	1	0	0	1	2
P23776	P23776	1	1	1	Glucan 1,3-beta-glucosidase I/II	EXG1		1	1	1	1	0	0	0	0	1	1	1	1	0	1	0	0	0	0	0	1	1	0	1	0	0	1	1	1	0	0	0	0	1	0	0	0	0	0	0	1	1	1
P24000	P24000	13	3	3	60S ribosomal protein L24-B	RPL24B		1	13	3	3	6	6	7	8	6	7	5	8	7	2	3	4	4	6	9	7	5	4	8	3	5	4	5	6	6	8	5	3	5	1	4	2	1	2	2	0	2	0
P24004	P24004	2	2	2	Peroxisomal ATPase PEX1	PEX1		1	2	2	2	0	0	1	1	1	1	1	1	1	1	1	2	1	0	0	1	1	1	1	1	1	1	1	2	0	1	1	1	2	0	1	0	0	1	1	1	1	1
P24276	P24276	5	5	5	Protein SSD1	SSD1		1	5	5	5	0	0	0	1	1	0	3	2	3	1	2	0	1	0	1	3	3	1	1	2	5	4	4	4	2	3	3	4	4	1	2	0	0	0	1	1	0	3
P24309	P24309	3	3	3	Lariat debranching enzyme	DBR1		1	3	3	3	1	2	1	2	1	2	2	2	2	2	2	2	0	1	0	2	1	2	2	1	2	2	1	2	2	2	2	1	2	0	1	1	2	1	2	1	2	2
P24384	P24384	3	3	3	Pre-mRNA-splicing factor ATP-dependent RNA helicase PRP22	PRP22		1	3	3	3	0	0	2	0	0	0	0	0	0	1	0	0	0	3	1	1	0	0	0	0	0	0	0	0	0	0	0	0	0	0	0	0	0	2	0	0	0	0
P24583	P24583	4	4	4	Protein kinase C-like 1	PKC1		1	4	4	4	0	0	0	0	0	0	0	0	0	0	0	1	2	2	0	1	1	0	1	1	1	1	2	2	0	1	3	3	2	1	1	0	0	0	0	0	0	0
P24719	P24719	5	5	5	Meiosis-specific serine/threonine-protein kinase MEK1	MEK1		1	5	5	5	0	0	0	0	0	2	0	1	2	2	2	3	2	1	2	3	2	2	4	3	3	2	3	3	1	2	2	3	3	0	0	0	0	0	0	0	2	0
P25042	P25042	1	1	1	Repressor ROX1	ROX1		1	1	1	1	0	0	0	1	0	0	0	1	0	0	0	0	0	1	0	0	0	0	0	0	0	0	0	0	0	0	0	0	0	0	0	0	0	0	1	0	0	0
P25043	P25043	2	2	2	Proteasome subunit beta type-2	PUP1		1	2	2	2	0	0	0	1	1	0	1	2	0	1	0	0	0	0	0	1	1	1	1	0	0	1	1	1	0	1	1	1	2	0	0	0	0	0	1	1	0	1
P25044	P25044	5	5	5	Tyrosine-protein phosphatase 1	PTP1		1	5	5	5	2	2	2	2	2	2	2	4	2	2	2	1	2	1	0	2	2	2	3	1	2	2	2	4	1	2	2	2	3	1	1	2	2	2	2	2	2	2
P25087	P25087	5	5	5	Sterol 24-C-methyltransferase	ERG6		1	5	5	5	0	0	2	0	3	3	3	1	3	2	2	0	0	1	0	2	3	3	1	0	3	4	3	1	0	3	3	3	2	0	0	0	0	2	0	3	3	3
P25338	P25338	1	1	1	Uncharacterized endoplasmic reticulum membrane protein YGL010W			1	1	1	1	0	0	0	0	0	0	0	0	0	0	0	0	0	0	0	0	0	0	0	0	0	0	0	0	0	0	0	0	1	0	0	0	0	0	0	0	0	0
P25339	P25339	2	2	2	Pumilio homology domain family member 4	PUF4		1	2	2	2	0	0	0	0	0	0	0	0	0	0	0	0	1	0	0	0	0	0	0	0	0	0	0	2	0	0	0	0	2	0	1	0	0	0	0	0	0	0
P25348	P25348	1	1	1	54S ribosomal protein L32, mitochondrial	MRPL32		1	1	1	1	0	0	0	0	0	0	0	0	0	0	0	0	0	1	0	0	0	0	0	0	0	0	0	0	0	0	0	0	0	0	0	0	0	0	0	0	0	0
P25349	P25349	2	2	2	Flavoprotein-like protein YCP4	YCP4		1	2	2	2	0	0	0	0	1	1	2	1	0	1	2	0	0	1	0	0	1	1	0	1	0	1	0	1	1	0	1	2	1	0	1	0	0	0	0	1	1	2
P25357	P25357	2	2	2	Probable DNA-binding protein SNT1	SNT1		1	2	2	2	1	0	1	0	0	1	0	1	0	0	1	1	1	1	0	1	0	0	1	0	1	0	0	0	0	0	1	1	1	0	0	1	0	1	0	0	1	0
P25364	P25364	2	2	2	Forkhead transcription factor HCM1	HCM1		1	2	2	2	1	0	0	0	1	1	1	1	1	1	1	1	0	1	0	1	1	1	1	0	1	1	1	1	0	1	1	1	1	0	0	1	0	0	0	1	1	1
P25367	P25367	2	2	2	[PIN+] prion protein RNQ1	RNQ1		1	2	2	2	1	1	1	1	0	0	0	0	1	0	0	0	0	1	0	1	0	0	0	0	0	0	0	0	0	0	0	0	1	0	0	1	1	1	1	0	0	0
P25373	P25373	1	1	1	Glutaredoxin-1	GRX1		1	1	1	1	1	0	1	0	1	1	0	1	1	0	0	0	0	0	1	0	0	1	1	0	0	1	1	1	0	1	0	0	0	0	0	1	0	1	0	1	1	0
P25375	P25375	3	3	3	Saccharolysin	PRD1		1	3	3	3	0	0	0	1	0	0	0	2	0	0	0	0	0	2	0	0	0	0	2	0	0	0	0	2	2	0	0	0	2	0	0	0	0	0	1	0	0	0
P25382	P25382	2	2	2	Ribosome assembly protein 4	RSA4		1	2	2	2	0	0	0	1	0	0	0	1	0	1	0	1	1	0	0	0	0	0	1	0	0	0	0	1	0	0	0	0	2	0	0	0	0	0	1	0	0	0
P25441	P25441	9	9	9	DNA-directed RNA polymerase III subunit RPC4	RPC53		1	9	9	9	3	3	4	3	3	4	2	5	5	3	4	4	3	4	3	4	3	5	5	2	4	4	6	6	2	6	2	5	5	1	2	3	3	4	3	3	4	2
P25443	P25443	11	11	11	40S ribosomal protein S2	RPS2		1	11	11	11	0	0	0	0	0	1	1	0	1	1	1	0	0	7	2	0	0	0	1	0	3	1	0	0	1	0	0	0	0	0	1	0	0	0	0	0	1	1
P25451	P25451	1	1	1	Proteasome subunit beta type-3	PUP3		1	1	1	1	0	0	0	0	0	0	0	0	1	0	0	0	0	0	0	0	0	0	0	0	1	0	0	0	1	0	0	0	0	0	1	0	0	0	0	0	0	0
P25453	P25453	7	7	7	Meiotic recombination protein DMC1	DMC1		1	7	7	7	0	1	1	0	1	1	1	1	2	1	1	2	1	2	2	1	1	2	4	1	1	2	1	5	1	2	2	1	3	1	1	0	1	1	0	1	1	1
P25454	P25454	1	1	1	DNA repair protein RAD51	RAD51		1	1	1	1	0	0	0	0	0	0	0	0	0	0	0	0	0	0	1	0	0	0	1	0	0	0	0	1	0	1	0	0	1	0	0	0	0	0	0	0	0	0
P25502	P25502	1	1	1	Proline utilization trans-activator	PUT3		1	1	1	1	0	0	0	0	0	0	0	0	0	0	0	0	0	0	1	1	0	0	1	0	0	0	0	0	0	1	0	1	0	0	0	0	0	0	0	0	0	0
P25567	P25567	29	29	29	RNA-binding protein SRO9	SRO9		1	29	29	29	17	17	19	18	14	15	19	13	16	15	14	11	10	12	14	10	16	15	10	6	13	13	12	10	9	11	13	14	9	3	6	17	17	19	18	14	15	19
P25569	P25569	1	1	1	Glucose-induced degradation protein 7	GID7		1	1	1	1	0	0	0	0	0	0	0	0	0	0	1	0	0	0	1	0	0	1	1	0	0	0	1	0	0	0	0	1	0	0	0	0	0	0	0	0	0	0
P25578	P25578	1	1	1	CDP-diacylglycerol--glycerol-3-phosphate 3-phosphatidyltransferase	PGS1		1	1	1	1	0	0	0	0	0	0	0	0	0	0	0	0	0	0	0	1	0	0	0	1	0	1	1	0	0	0	0	1	0	0	1	0	0	0	0	0	0	0
P25579	P25579	1	1	1	Laminarase-resistance protein LRE1	LRE1		1	1	1	1	0	0	0	0	0	0	0	0	0	0	0	0	0	0	0	0	0	0	1	0	0	0	0	1	0	0	0	0	0	0	0	0	0	0	0	0	0	0
P25588	P25588	3	3	3	Mediator of replication checkpoint protein 1	MRC1		1	3	3	3	0	0	0	0	0	0	0	0	0	0	0	0	0	2	1	0	0	0	0	0	0	0	0	0	0	0	0	0	0	0	0	0	0	0	0	0	0	0
P25605	P25605	19	19	19	Acetolactate synthase small subunit, mitochondrial	ILV6		1	19	19	19	12	12	12	13	9	11	13	12	8	12	9	8	4	2	2	7	9	6	11	2	10	7	9	12	3	9	6	5	12	1	2	12	12	12	13	9	11	13
P25611	P25611	2	2	2	Regulator of drug sensitivity 1	RDS1		1	2	2	2	0	1	2	2	0	0	0	0	1	0	0	0	1	0	0	2	0	0	0	0	0	0	1	0	0	2	1	0	1	0	0	0	1	2	2	0	0	0
P25617	P25617	4	4	4	Uncharacterized protein YCR016W			1	4	4	4	1	2	1	1	1	2	1	0	1	2	0	0	1	2	1	1	0	0	1	0	1	1	0	0	0	2	1	0	0	0	0	1	2	1	1	1	2	1
P25651	P25651	5	5	5	Monopolin complex subunit CSM1	CSM1		1	5	5	5	4	4	3	3	5	4	4	4	5	5	4	4	3	2	4	2	3	2	3	1	2	3	1	4	1	3	1	2	2	0	2	4	4	3	3	5	4	4
P25694	P25694	3	3	3	Cell division control protein 48	CDC48		1	3	3	3	2	3	2	2	3	2	3	2	2	2	1	1	1	1	2	1	1	2	2	1	1	1	1	1	2	2	1	2	2	0	1	2	3	2	2	3	2	3
P25719	P25719	2	1	1	Peptidyl-prolyl cis-trans isomerase C, mitochondrial	CPR3		1	2	1	1	0	1	0	0	1	0	1	0	1	1	1	0	1	2	1	0	2	1	0	0	1	0	0	0	2	0	1	0	0	0	1	0	0	0	0	1	0	1
P25847	P25847	4	4	4	DNA mismatch repair protein MSH2	MSH2		1	4	4	4	0	0	1	1	0	1	0	0	0	1	0	0	0	0	0	3	0	0	0	0	0	0	1	0	0	1	1	0	2	0	0	0	0	1	1	0	1	0
P26321	P26321	11	11	11	60S ribosomal protein L5	RPL5		1	11	11	11	4	4	4	4	5	3	4	6	5	4	4	4	2	5	3	5	6	4	10	3	5	5	5	6	4	5	5	4	6	0	4	4	4	4	4	5	3	4
P26343	P26343	2	2	2	Nitrogen regulatory protein DAL80	DAL80		1	2	2	2	0	1	1	0	0	0	0	1	1	0	0	0	0	1	1	0	0	0	1	0	0	0	0	0	0	0	0	0	0	0	0	0	1	1	0	0	0	0
P26570	P26570	5	5	5	Serine/threonine-protein phosphatase PP-Z1	PPZ1		1	5	5	5	2	2	1	3	1	1	2	2	1	2	2	1	0	0	0	1	2	2	3	0	1	1	1	4	0	1	1	1	2	0	0	2	2	1	3	1	1	2
P26637	P26637	1	1	1	Leucine--tRNA ligase, cytoplasmic	CDC60		1	1	1	1	0	0	0	0	0	0	0	0	1	1	0	0	0	0	0	0	1	0	0	1	0	1	0	1	0	1	0	0	1	0	1	0	0	0	0	0	0	0
P26783	P26783	6	6	6	40S ribosomal protein S5	RPS5		1	6	6	6	1	1	1	2	1	1	1	0	0	1	0	0	0	3	3	1	0	0	2	0	1	0	1	0	0	2	0	0	0	0	0	1	1	1	2	1	1	1
P26784	P26784	8	4	4	60S ribosomal protein L16-A	RPL16A		1	8	4	4	5	5	4	7	5	4	4	5	5	1	3	6	4	3	6	3	3	3	5	3	5	2	3	5	3	3	3	4	2	0	2	3	3	2	4	3	3	3
P26785	P26785	12	12	8	60S ribosomal protein L16-B	RPL16B		1	12	12	8	6	7	7	9	7	5	4	8	6	4	4	7	5	6	7	4	4	4	8	4	5	3	4	8	4	4	3	3	6	0	3	6	7	7	9	7	5	4
P26786	P26786	22	22	10	40S ribosomal protein S7-A	RPS7A		1	22	22	10	9	6	7	9	8	7	7	9	12	8	5	4	7	15	11	9	6	7	11	7	8	5	9	9	8	9	8	5	7	1	2	9	6	7	9	8	7	7
P26798	P26798	2	2	2	Protein INO2	INO2		1	2	2	2	0	1	1	2	0	0	0	0	0	0	0	1	0	1	0	0	0	0	0	0	0	0	0	1	0	0	0	0	0	0	0	0	1	1	2	0	0	0
P27472	P27472	23	23	21	Glycogen [starch] synthase isoform 2	GSY2		1	23	23	21	13	12	16	19	10	12	12	14	11	10	10	13	8	6	6	9	10	6	16	6	7	7	6	12	5	9	11	5	14	6	6	13	12	16	19	10	12	12
P27514	P27514	1	1	1	Low-affinity phosphate transporter PHO91	PHO91		1	1	1	1	0	0	0	0	0	0	0	0	0	0	0	0	0	0	0	0	0	0	0	0	0	0	0	0	0	0	0	0	1	0	0	0	0	0	0	0	0	0
P27614	P27614	22	22	22	Carboxypeptidase S	CPS1		1	22	22	22	17	15	16	19	10	11	16	15	16	11	9	12	6	5	3	15	12	8	12	4	17	9	12	14	4	11	10	8	13	5	3	17	15	16	19	10	11	16
P27616	P27616	4	4	4	Phosphoribosylaminoimidazole-succinocarboxamide synthase	ADE1		1	4	4	4	3	3	3	3	3	3	3	3	3	2	3	2	1	2	1	2	3	3	3	1	3	2	2	2	1	3	2	3	2	1	1	3	3	3	3	3	3	3
P27692	P27692	3	3	3	Transcription elongation factor SPT5	SPT5		1	3	3	3	1	1	1	0	1	1	1	0	1	1	1	1	1	2	0	1	0	1	1	0	0	1	1	1	0	2	1	1	1	0	0	1	1	1	0	1	1	1
P27705	P27705	2	2	2	Regulatory protein MIG1	MIG1		1	2	2	2	0	1	0	1	0	0	0	1	0	0	1	0	0	1	0	0	0	0	0	0	0	0	0	1	0	0	0	0	1	0	0	0	1	0	1	0	0	0
P28000	P28000	2	2	2	DNA-directed RNA polymerases I and III subunit RPAC2	RPC19		1	2	2	2	1	1	1	1	1	1	1	1	1	1	1	2	2	1	2	1	1	1	2	1	1	1	1	2	1	1	1	1	2	0	1	1	1	1	1	1	1	1
P28003	P28003	1	1	1	SWIRM domain-containing protein FUN19	FUN19		1	1	1	1	1	0	1	1	0	0	0	0	0	1	0	0	0	1	0	0	0	0	0	0	0	0	0	0	0	0	0	0	0	0	0	1	0	1	1	0	0	0
P28004	P28004	11	11	11	Pre-mRNA-processing protein 45	PRP45		1	11	11	11	5	7	7	9	5	5	5	8	6	6	4	7	4	2	9	9	5	3	10	4	6	8	6	7	1	7	6	5	6	3	2	5	7	7	9	5	5	5
P28007	P28007	1	1	1	H/ACA ribonucleoprotein complex subunit 1	GAR1		1	1	1	1	1	1	1	1	1	1	1	1	1	1	1	0	0	0	0	1	1	1	1	0	1	1	1	0	0	1	1	1	0	0	0	1	1	1	1	1	1	1
P28240	P28240	14	14	14	Isocitrate lyase	ICL1		1	14	14	14	2	1	0	1	2	5	8	2	4	3	3	1	0	4	3	0	1	3	4	0	2	5	1	2	1	0	3	2	2	0	0	2	1	0	1	2	5	8
P28241	P28241	6	6	6	Isocitrate dehydrogenase [NAD] subunit 2, mitochondrial	IDH2		1	6	6	6	1	0	3	1	2	2	2	3	2	2	3	1	0	3	2	2	2	2	1	2	2	3	2	1	2	1	2	2	1	0	2	1	0	3	1	2	2	2
P28274	P28274	4	4	3	CTP synthase 1	URA7		1	4	4	3	1	0	1	2	2	2	2	2	1	2	1	2	0	3	0	2	1	1	2	0	1	1	1	2	0	1	2	1	2	0	0	1	0	1	2	2	2	2
P28321	P28321	2	2	2	Monoglyceride lipase	YJU3		1	2	2	2	0	0	0	0	2	1	2	0	2	2	2	0	0	0	0	0	1	1	0	0	2	0	0	0	0	0	0	2	0	0	0	0	0	0	0	2	1	2
P28707	P28707	2	2	2	Co-chaperone protein SBA1	SBA1		1	2	2	2	1	0	1	1	0	0	0	1	1	1	0	2	1	1	1	1	1	1	2	1	1	1	1	1	1	1	1	1	1	1	1	1	0	1	1	0	0	0
P28834	P28834	2	2	2	Isocitrate dehydrogenase [NAD] subunit 1, mitochondrial	IDH1		1	2	2	2	0	0	0	1	0	1	0	0	1	0	0	1	0	1	1	0	0	1	0	0	0	0	0	0	1	0	0	1	0	0	0	0	0	0	1	0	1	0
P29056	P29056	6	6	6	Transcription factor IIIB 70 kDa subunit	BRF1		1	6	6	6	2	3	4	5	2	2	1	3	3	2	2	2	3	4	2	1	1	0	5	0	1	1	1	1	0	2	1	1	1	0	0	2	3	4	5	2	2	1
P29295	P29295	6	6	6	Casein kinase I homolog HRR25	HRR25		1	6	6	6	1	1	1	3	1	1	1	2	2	1	1	2	2	2	0	1	1	2	3	0	2	1	2	2	0	1	3	3	4	0	2	1	1	1	3	1	1	1
P29311	P29311	7	1	1	Protein BMH1	BMH1		1	7	1	1	0	1	1	1	0	2	2	2	1	1	2	1	0	4	1	1	2	2	1	0	2	2	2	1	0	1	1	2	1	0	0	0	0	0	0	0	0	0
P29547	P29547	2	1	1	Elongation factor 1-gamma 1	CAM1		1	2	1	1	0	0	0	0	0	1	2	0	1	1	0	0	0	0	0	0	0	0	0	0	0	1	1	0	0	0	0	0	0	0	0	0	0	0	0	0	0	1
P30619	P30619	3	3	3	Protein transport protein SEC1	SEC1		1	3	3	3	1	1	1	1	1	1	0	1	1	1	0	1	2	2	0	1	1	0	1	1	1	0	0	1	1	1	0	0	1	0	1	1	1	1	1	1	1	0
P30656	P30656	2	2	2	Proteasome subunit beta type-5	PRE2		1	2	2	2	1	1	1	1	1	1	1	1	1	1	1	0	1	1	1	1	2	2	0	1	1	1	1	1	1	1	1	2	1	0	1	1	1	1	1	1	1	1
P30822	P30822	1	1	1	Exportin-1	CRM1		1	1	1	1	0	0	0	1	0	0	0	1	0	0	0	1	0	0	0	0	0	0	1	0	0	0	0	1	0	0	0	0	1	0	0	0	0	0	1	0	0	0
P30902	P30902	2	2	2	ATP synthase subunit d, mitochondrial	ATP7		1	2	2	2	0	0	1	0	0	1	0	1	1	0	0	1	0	1	1	1	0	0	0	0	0	0	1	0	0	0	0	0	1	0	0	0	0	1	0	0	1	0
P30952	P30952	9	9	8	Malate synthase 1, glyoxysomal	MLS1		1	9	9	8	5	4	6	5	4	3	4	2	4	3	4	2	3	4	2	4	3	4	3	2	4	4	4	4	2	3	3	3	3	1	2	5	4	6	5	4	3	4
P31111	P31111	26	26	26	Synaptonemal complex protein ZIP1	ZIP1		1	26	26	26	1	0	0	0	0	1	0	0	2	1	1	6	8	6	10	22	12	6	12	9	9	15	16	16	5	23	15	15	12	1	7	1	0	0	0	0	1	0
P31244	P31244	4	4	4	DNA repair protein RAD16	RAD16		1	4	4	4	2	2	2	0	1	0	1	1	2	2	2	0	0	2	2	2	0	2	0	0	0	1	0	0	0	2	1	1	0	0	0	2	2	2	0	1	0	1
P31334	P31334	2	2	2	54S ribosomal protein L9, mitochondrial	MRPL9		1	2	2	2	0	0	0	0	0	1	1	0	1	1	1	0	0	1	0	0	0	0	0	0	0	0	0	0	0	0	0	0	0	0	0	0	0	0	0	0	1	1
P31376	P31376	8	8	8	SWR1-complex protein 3	SWC3		1	8	8	8	5	4	4	5	4	4	4	4	5	4	4	4	2	3	5	4	4	4	4	2	3	5	4	4	2	5	3	5	4	1	2	5	4	4	5	4	4	4
P31378	P31378	7	7	7	Endonuclease III homolog 1	NTG1		1	7	7	7	2	2	2	4	1	3	1	3	1	1	1	2	2	4	5	2	1	1	3	1	1	1	0	3	1	1	1	1	2	0	1	2	2	2	4	1	3	1
P31384	P31384	3	3	3	Glucose-repressible alcohol dehydrogenase transcriptional effector	CCR4		1	3	3	3	0	0	0	0	0	1	0	1	0	0	0	1	1	2	0	1	1	0	1	0	1	1	1	1	0	1	1	0	1	1	0	0	0	0	0	0	1	0
P31385	P31385	6	6	6	Transcriptional regulatory protein DEP1	DEP1		1	6	6	6	1	2	3	2	1	1	1	1	2	2	2	1	2	2	3	1	1	1	4	0	1	1	1	2	0	1	1	1	3	0	0	1	2	3	2	1	1	1
P31539	P31539	2	2	2	Heat shock protein 104	HSP104		1	2	2	2	0	0	0	0	0	0	0	0	0	0	0	0	0	1	0	0	1	0	0	1	0	0	0	0	1	0	0	0	0	0	1	0	0	0	0	0	0	0
P31787	P31787	2	2	2	Acyl-CoA-binding protein	ACB1		1	2	2	2	0	0	0	1	0	0	0	1	0	0	0	2	0	0	0	0	0	0	2	0	0	0	0	1	0	0	0	0	2	0	0	0	0	0	1	0	0	0
P32074	P32074	1	1	1	Coatomer subunit gamma	SEC21		1	1	1	1	0	1	1	1	1	1	1	0	1	1	1	0	0	0	0	1	1	1	0	0	1	1	1	1	0	1	1	1	0	0	0	0	1	1	1	1	1	1
P32179	P32179	1	1	1	3(2),5-bisphosphate nucleotidase	MET22		1	1	1	1	0	0	0	0	1	1	0	0	1	1	0	0	0	0	0	1	1	1	0	0	1	1	0	0	0	1	0	0	0	0	0	0	0	0	0	1	1	0
P32190	P32190	1	1	1	Glycerol kinase	GUT1		1	1	1	1	0	0	0	0	0	0	1	0	0	1	0	0	0	0	0	0	0	1	0	0	0	0	0	0	0	0	1	1	0	0	0	0	0	0	0	0	0	1
P32191	P32191	3	3	3	Glycerol-3-phosphate dehydrogenase, mitochondrial	GUT2		1	3	3	3	1	0	0	1	2	2	2	1	3	3	2	0	2	1	0	2	0	2	1	0	1	2	2	1	2	1	2	1	0	0	2	1	0	0	1	2	2	2
P32264	P32264	1	1	1	Glutamate 5-kinase	PRO1		1	1	1	1	0	0	0	0	0	0	0	0	0	0	0	0	0	1	0	0	0	0	1	0	0	0	0	0	0	0	0	0	0	0	0	0	0	0	0	0	0	0
P32288	P32288	2	2	2	Glutamine synthetase	GLN1		1	2	2	2	0	0	0	0	0	0	1	1	0	0	0	0	0	1	0	0	0	0	1	0	0	0	0	0	0	0	0	0	0	0	0	0	0	0	0	0	0	1
P32316;P40008	P32316	35;1	35;1	35;1	Acetyl-CoA hydrolase	ACH1		2	35	35	35	23	19	23	17	21	22	25	15	23	24	19	13	10	10	11	18	19	17	16	8	20	20	20	15	7	19	19	19	21	6	11	23	19	23	17	21	22	25
P32317	P32317	6	6	6	Protein AFG1	AFG1		1	6	6	6	1	3	2	2	2	2	3	3	0	4	3	1	2	3	0	1	2	2	2	2	2	1	0	3	0	0	0	1	3	0	1	1	3	2	2	2	2	3
P32324	P32324	10	10	10	Elongation factor 2	EFT1		1	10	10	10	2	3	2	2	3	3	4	2	3	5	4	2	2	3	4	2	2	4	4	1	3	4	2	2	2	3	5	4	2	0	3	2	3	2	2	3	3	4
P32325	P32325	1	1	1	DDK kinase regulatory subunit DBF4	DBF4		1	1	1	1	0	0	0	0	0	0	0	0	0	0	0	0	0	0	0	0	0	0	0	0	0	0	0	0	0	1	0	0	0	0	0	0	0	0	0	0	0	0
P32330	P32330	2	2	2	2-deoxy-glucose resistant protein 2	DGR2		1	2	2	2	1	0	1	0	0	0	0	0	1	0	0	0	0	1	0	0	0	0	0	1	0	0	0	0	1	0	0	0	1	0	0	1	0	1	0	0	0	0
P32333	P32333	5	5	5	TATA-binding protein-associated factor MOT1	MOT1		1	5	5	5	1	2	1	0	2	2	2	1	4	3	2	2	1	2	3	2	3	2	2	1	3	2	1	3	1	3	4	3	3	0	1	1	2	1	0	2	2	2
P32340	P32340	3	3	3	Rotenone-insensitive NADH-ubiquinone oxidoreductase, mitochondrial	NDI1		1	3	3	3	0	1	1	1	1	1	1	0	1	0	1	0	1	2	0	0	0	1	0	0	1	1	1	1	0	1	0	1	0	0	0	0	1	1	1	1	1	1
P32349	P32349	2	2	2	DNA-directed RNA polymerase III subunit RPC3	RPC82		1	2	2	2	1	1	1	1	1	2	1	1	1	1	1	1	1	1	0	1	1	0	2	1	0	1	1	1	1	1	1	1	1	0	1	1	1	1	1	1	2	1
P32351	P32351	1	1	1	Sugar utilization regulatory protein IMP2	IMP2		1	1	1	1	1	1	1	0	1	1	0	0	1	1	0	1	0	0	0	1	0	0	1	0	1	1	0	1	0	1	1	1	1	0	0	1	1	1	0	1	1	0
P32361	P32361	1	1	1	Serine/threonine-protein kinase/endoribonuclease IRE1;Serine/threonine-protein kinase;Endoribonuclease	IRE1		1	1	1	1	0	0	1	0	0	0	0	0	0	0	0	0	0	0	0	0	0	0	0	0	0	0	1	0	0	1	0	1	0	0	0	0	0	1	0	0	0	0
P32368	P32368	5	5	5	Phosphoinositide phosphatase SAC1	SAC1		1	5	5	5	1	0	0	2	0	0	0	0	0	0	0	0	2	4	0	0	0	0	0	0	0	0	0	0	0	0	0	0	0	0	0	1	0	0	2	0	0	0
P32375	P32375	1	1	1	Allantoinase	DAL1		1	1	1	1	0	0	0	0	0	0	0	0	0	0	0	0	0	1	0	0	0	0	0	0	0	0	0	0	0	0	0	0	0	0	0	0	0	0	0	0	0	0
P32385	P32385	2	2	2	Ribonucleoprotein 1	RNP1		1	2	2	2	0	0	0	0	0	0	0	0	0	0	0	0	0	0	0	0	0	0	2	0	0	0	0	1	0	0	0	0	0	0	0	0	0	0	0	0	0	0
P32387	P32387	1	1	1	54S ribosomal protein L41, mitochondrial	MRP20		1	1	1	1	0	0	0	0	0	0	1	0	0	0	0	0	0	0	0	0	0	0	0	0	1	0	0	0	1	0	0	0	0	0	1	0	0	0	0	0	0	1
P32389	P32389	3	3	3	Transcriptional activator of sulfur metabolism MET4	MET4		1	3	3	3	0	0	0	0	0	0	0	0	0	0	0	0	0	2	2	0	0	0	0	0	0	0	0	0	0	0	0	0	0	0	0	0	0	0	0	0	0	0
P32419	P32419	3	3	3	Malate dehydrogenase, peroxisomal	MDH3		1	3	3	3	0	0	0	0	0	0	1	0	0	0	1	0	0	0	0	1	0	2	0	0	1	1	1	0	1	0	0	1	0	0	1	0	0	0	0	0	0	1
P32432	P32432	3	3	3	Transcription factor SFP1	SFP1		1	3	3	3	1	1	2	2	1	0	1	3	0	0	1	1	0	1	0	0	0	0	2	0	0	0	0	0	0	0	0	1	1	0	1	1	1	2	2	1	0	1
P32445	P32445	1	1	1	Single-stranded DNA-binding protein RIM1, mitochondrial	RIM1		1	1	1	1	1	1	1	1	0	1	0	0	1	1	0	0	0	0	0	0	0	0	0	0	0	0	0	0	1	0	0	0	0	0	0	1	1	1	1	0	1	0
P32448	P32448	26	26	26	Anti-silencing protein 2	ASF2		1	26	26	26	5	8	13	11	17	17	18	19	13	17	12	12	11	7	15	7	7	5	13	1	4	6	10	8	0	11	7	7	8	2	1	5	8	13	11	17	17	18
P32449	P32449	4	4	4	Phospho-2-dehydro-3-deoxyheptonate aldolase, tyrosine-inhibited	ARO4		1	4	4	4	3	3	3	1	3	3	4	2	3	3	4	1	2	1	2	3	3	2	2	2	3	2	2	2	2	2	3	2	2	1	2	3	3	3	1	3	3	4
P32452	P32452	1	1	1	Putative prephenate dehydratase	PHA2		1	1	1	1	0	0	0	0	0	0	0	1	0	0	0	0	0	0	0	0	0	0	1	0	0	0	0	1	0	0	0	0	0	0	0	0	0	0	0	0	0	0
P32457	P32457	18	18	18	Cell division control protein 3	CDC3		1	18	18	18	11	11	12	11	11	8	13	12	12	10	12	12	3	6	11	11	10	10	12	2	10	12	9	12	4	13	10	12	11	2	4	11	11	12	11	11	8	13
P32471	P32471	9	9	9	Elongation factor 1-beta	EFB1		1	9	9	9	4	0	2	4	1	4	3	3	3	4	3	3	2	5	2	2	2	5	3	1	6	3	1	2	4	2	2	4	2	2	0	4	0	2	4	1	4	3
P32473	P32473	1	1	1	Pyruvate dehydrogenase E1 component subunit beta, mitochondrial	PDB1		1	1	1	1	0	0	0	0	0	0	1	0	1	0	1	0	0	0	0	0	0	1	0	0	1	1	0	0	0	0	0	1	0	0	0	0	0	0	0	0	0	1
P32480	P32480	4	4	4	Protein HIR2	HIR2		1	4	4	4	2	2	2	2	2	3	1	1	3	3	1	2	2	2	4	1	2	0	1	0	1	2	0	2	0	2	2	1	2	0	1	2	2	2	2	2	3	1
P32481	P32481	3	3	3	Eukaryotic translation initiation factor 2 subunit gamma	GCD11		1	3	3	3	0	0	0	0	1	0	1	0	1	1	1	0	0	1	0	0	0	1	0	0	2	1	0	0	0	0	0	0	0	0	0	0	0	0	0	1	0	1
P32485	P32485	5	5	5	Mitogen-activated protein kinase HOG1	HOG1		1	5	5	5	3	3	1	3	3	3	3	2	3	3	1	2	0	2	0	2	3	2	3	1	2	2	2	4	0	2	1	1	4	1	1	3	3	1	3	3	3	3
P32494	P32494	2	2	2	Chromatin-remodeling complexes subunit NGG1	NGG1		1	2	2	2	1	0	1	0	0	0	0	0	0	0	0	0	0	1	1	0	0	0	1	0	0	0	0	0	0	0	0	0	0	0	0	1	0	1	0	0	0	0
P32496	P32496	1	1	1	26S proteasome regulatory subunit RPN12	RPN12		1	1	1	1	0	0	0	0	0	0	1	0	1	1	1	0	0	1	0	0	0	0	0	0	1	1	1	0	1	1	0	1	0	0	1	0	0	0	0	0	0	1
P32497	P32497	1	1	1	Eukaryotic translation initiation factor 3 subunit C	NIP1		1	1	1	1	0	0	0	0	0	0	0	0	0	0	0	0	0	1	0	0	0	0	0	0	0	0	0	0	0	0	0	0	0	0	0	0	0	0	0	0	0	0
P32499	P32499	3	3	3	Nucleoporin NUP2	NUP2		1	3	3	3	0	0	0	0	0	0	1	1	0	0	0	0	0	1	0	0	0	0	2	0	1	0	0	1	0	0	0	0	1	0	0	0	0	0	0	0	0	1
P32504	P32504	3	3	3	Centromere DNA-binding protein complex CBF3 subunit A	CBF2		1	3	3	3	1	1	2	1	1	1	1	1	1	1	1	0	0	0	1	1	1	1	0	0	0	1	0	0	0	1	1	1	1	0	0	1	1	2	1	1	1	1
P32529	P32529	5	5	5	DNA-directed RNA polymerase I subunit RPA12	RPA12		1	5	5	5	0	2	2	3	0	1	0	1	0	0	0	1	0	1	3	0	1	0	1	0	0	0	0	3	0	2	0	0	1	0	0	0	2	2	3	0	1	0
P32561	P32561	2	2	2	Histone deacetylase RPD3	RPD3		1	2	2	2	0	1	0	0	0	1	0	1	1	1	1	0	1	0	0	0	1	0	2	1	0	1	1	2	1	0	1	1	2	0	1	0	1	0	0	0	1	0
P32562	P32562	2	2	2	Cell cycle serine/threonine-protein kinase CDC5/MSD2	CDC5		1	2	2	2	0	0	0	0	0	0	0	0	0	0	0	0	0	0	0	0	0	0	0	0	0	0	0	0	0	1	1	0	0	0	0	0	0	0	0	0	0	0
P32565	P32565	5	5	5	26S proteasome regulatory subunit RPN2	RPN2		1	5	5	5	1	1	1	0	1	1	1	0	1	2	1	0	0	1	1	2	1	1	0	0	2	2	3	2	0	1	1	1	0	0	0	1	1	1	0	1	1	1
P32566	P32566	6	6	6	Cell wall assembly regulator SMI1	SMI1		1	6	6	6	3	3	4	4	2	3	3	3	2	2	2	4	1	2	4	2	2	2	4	1	3	3	1	3	2	2	2	3	2	0	2	3	3	4	4	2	3	3
P32578	P32578	2	2	2	SNF1 protein kinase subunit beta-1	SIP1		1	2	2	2	0	0	0	0	0	0	0	0	0	0	0	0	0	1	1	0	0	0	0	0	0	0	0	0	0	0	0	0	0	0	0	0	0	0	0	0	0	0
P32581	P32581	3	3	3	Meiosis induction protein kinase IME2/SME1	IME2		1	3	3	3	0	0	0	0	0	0	1	1	1	3	2	1	1	0	0	3	3	1	1	1	1	1	3	2	1	3	3	3	2	0	2	0	0	0	0	0	0	1
P32582	P32582	1	1	1	Cystathionine beta-synthase	CYS4		1	1	1	1	0	0	0	0	0	0	0	0	0	0	0	0	0	0	0	0	0	1	0	0	0	0	0	0	0	0	0	0	0	0	0	0	0	0	0	0	0	0
P32583	P32583	5	5	5	Suppressor protein SRP40	SRP40		1	5	5	5	1	4	3	3	1	1	0	3	3	1	1	2	3	1	3	3	2	1	2	0	1	2	1	3	1	4	2	0	2	0	2	1	4	3	3	1	1	0
P32589	P32589	2	1	1	Heat shock protein homolog SSE1	SSE1		1	2	1	1	0	0	0	0	0	0	0	0	0	0	0	0	0	1	0	0	0	0	0	0	0	0	0	0	1	0	0	0	0	0	1	0	0	0	0	0	0	0
P32590	P32590	3	3	2	Heat shock protein homolog SSE2	SSE2		1	3	3	2	0	0	0	1	0	0	0	0	0	1	0	0	0	1	1	1	1	0	1	0	1	1	1	1	1	1	1	1	1	0	2	0	0	0	1	0	0	0
P32591	P32591	3	3	3	SWI/SNF complex subunit SWI3	SWI3		1	3	3	3	2	2	3	2	3	3	2	3	3	3	2	1	2	0	2	3	2	3	2	2	3	3	3	1	0	2	3	3	2	0	1	2	2	3	2	3	3	2
P32597	P32597	9	9	9	Nuclear protein STH1/NPS1	STH1		1	9	9	9	4	4	3	2	4	3	2	1	3	3	3	1	3	6	2	1	1	1	1	3	1	2	1	2	1	2	2	1	2	0	0	4	4	3	2	4	3	2
P32598	P32598	3	3	3	Serine/threonine-protein phosphatase PP1-2	GLC7		1	3	3	3	0	1	1	0	0	1	0	1	0	1	1	1	0	0	1	2	1	0	2	0	2	1	2	1	0	0	2	0	1	0	0	0	1	1	0	0	1	0
P32599	P32599	1	1	1	Fimbrin	SAC6		1	1	1	1	0	0	0	0	0	0	0	0	0	0	0	0	0	0	1	0	0	0	0	0	0	0	0	0	0	0	0	0	0	0	0	0	0	0	0	0	0	0
P32603	P32603	1	1	1	Sporulation-specific glucan 1,3-beta-glucosidase	SPR1		1	1	1	1	0	0	0	0	0	0	0	0	0	0	0	0	0	0	0	0	0	0	0	0	0	0	0	0	0	0	0	0	1	0	0	0	0	0	0	0	0	0
P32606	P32606	2	2	2	Putative mitochondrial translation system component PET127	PET127		1	2	2	2	1	0	1	0	0	0	0	0	0	0	0	0	0	1	0	1	1	0	0	0	0	1	0	0	0	0	1	1	0	0	0	1	0	1	0	0	0	0
P32611	P32611	2	2	2	54S ribosomal protein RML2, mitochondrial	RML2		1	2	2	2	2	2	2	2	2	2	2	2	2	2	2	1	0	0	0	2	2	2	2	0	2	2	2	2	0	2	2	2	2	0	0	2	2	2	2	2	2	2
P32621	P32621	2	2	2	Guanosine-diphosphatase	GDA1		1	2	2	2	0	0	0	0	0	0	0	0	0	0	0	0	0	1	1	1	1	0	0	0	1	1	1	0	0	1	0	1	0	0	0	0	0	0	0	0	0	0
P32639	P32639	1	1	1	Pre-mRNA-splicing helicase BRR2	BRR2		1	1	1	1	0	0	0	0	0	0	0	0	0	0	0	0	0	1	0	0	0	0	0	0	0	0	0	0	0	0	0	0	0	0	0	0	0	0	0	0	0	0
P32657	P32657	4	4	4	Chromo domain-containing protein 1	CHD1		1	4	4	4	1	1	2	1	1	1	1	1	1	1	1	1	0	1	0	1	1	1	1	0	1	1	2	1	0	2	1	1	1	0	0	1	1	2	1	1	1	1
P32771	P32771	2	2	2	S-(hydroxymethyl)glutathione dehydrogenase	SFA1		1	2	2	2	0	0	0	0	0	0	0	0	0	0	0	0	0	0	0	0	0	0	0	0	1	0	0	1	0	0	0	1	0	0	0	0	0	0	0	0	0	0
P32773	P32773	11	11	11	Transcription initiation factor IIA large subunit	TOA1		1	11	11	11	9	9	8	9	6	7	7	5	8	7	8	5	4	4	6	5	6	6	9	2	8	7	5	8	2	5	6	7	8	0	3	9	9	8	9	6	7	7
P32775	P32775	12	12	12	1,4-alpha-glucan-branching enzyme	GLC3		1	12	12	12	8	7	9	6	8	8	7	6	10	7	6	4	6	4	1	10	5	6	7	3	8	7	7	7	3	9	5	5	10	3	5	8	7	9	6	8	8	7
P32796	P32796	2	2	2	Carnitine O-acetyltransferase, mitochondrial	CAT2		1	2	2	2	0	1	0	0	1	1	1	0	0	1	2	0	0	1	0	0	0	1	0	1	2	1	2	0	1	1	0	1	0	0	1	0	1	0	0	1	1	1
P32805	P32805	10	10	10	Zinc finger protein FZF1	FZF1		1	10	10	10	6	5	5	7	4	4	3	7	4	5	4	6	5	2	2	3	4	2	7	3	4	4	2	6	2	4	5	3	5	2	3	6	5	5	7	4	4	3
P32832	P32832	3	3	3	Chromatin structure-remodeling complex subunit RSC7	NPL6		1	3	3	3	3	2	2	0	1	1	1	0	2	1	2	0	1	1	2	2	1	0	2	1	0	1	1	0	0	1	1	0	1	0	1	3	2	2	0	1	1	1
P32833	P32833	3	3	3	Origin recognition complex subunit 2	ORC2		1	3	3	3	1	0	1	1	0	1	0	0	1	1	1	1	1	1	3	1	0	0	0	1	1	0	1	1	1	0	0	0	0	0	0	1	0	1	1	0	1	0
P32835;P32836	P32835;P32836	6;6	6;6	6;6	GTP-binding nuclear protein GSP1/CNR1;GTP-binding nuclear protein GSP2/CNR2	GSP1;GSP2	;	2	6	6	6	0	1	1	1	1	0	0	1	1	0	0	2	0	1	1	0	0	0	3	0	1	0	1	1	1	0	0	2	1	0	2	0	1	1	1	1	0	0
P32841	P32841	1	1	1	Meiotic recombination protein REC114	REC114		1	1	1	1	0	0	0	0	0	0	0	0	1	1	0	0	0	0	0	0	0	0	0	0	0	0	0	0	0	0	0	0	0	0	0	0	0	0	0	0	0	0
P32849	P32849	2	2	2	DNA repair protein RAD5	RAD5		1	2	2	2	0	0	0	0	1	1	1	1	0	0	1	0	0	2	1	0	0	0	2	0	0	0	0	0	0	0	0	0	0	0	0	0	0	0	0	1	1	1
P32861	P32861	5	5	5	UTP--glucose-1-phosphate uridylyltransferase	UGP1		1	5	5	5	0	0	1	0	4	3	4	1	3	3	3	0	0	2	0	1	4	4	2	1	4	3	4	1	1	1	2	2	0	0	1	0	0	1	0	4	3	4
P32891	P32891	4	4	4	D-lactate dehydrogenase [cytochrome] 1, mitochondrial	DLD1		1	4	4	4	0	0	0	1	2	2	2	1	1	2	2	1	0	3	0	1	2	1	1	0	1	0	0	0	1	0	0	0	0	0	0	0	0	0	1	2	2	2
P32892	P32892	2	2	2	ATP-dependent RNA helicase DRS1	DRS1		1	2	2	2	1	1	1	1	1	2	2	1	2	1	1	2	1	1	2	2	1	1	2	1	2	2	1	1	1	1	2	2	1	0	1	1	1	1	1	1	2	2
P32895	P32895	1	1	1	Ribose-phosphate pyrophosphokinase 1	PRS1		1	1	1	1	0	0	0	0	1	1	1	1	0	1	1	0	0	0	1	0	0	1	1	0	0	0	1	0	0	0	1	1	0	0	0	0	0	0	0	1	1	1
P32896	P32896	3	3	3	Protein PDC2	PDC2		1	3	3	3	1	1	1	1	1	1	1	1	1	1	1	1	1	1	1	1	1	1	1	0	1	1	1	2	0	1	1	1	1	0	1	1	1	1	1	1	1	1
P32897	P32897	1	1	1	Mitochondrial import inner membrane translocase subunit TIM23	TIM23		1	1	1	1	0	0	0	0	0	0	0	0	0	0	0	0	0	1	0	0	0	0	0	0	0	0	0	0	0	0	0	0	0	0	0	0	0	0	0	0	0	0
P32898	P32898	1	1	1	Mitochondrial presequence protease	CYM1		1	1	1	1	1	1	1	0	1	1	1	0	1	1	1	0	1	1	0	1	0	0	0	0	0	0	0	0	1	0	0	0	0	0	1	1	1	1	0	1	1	1
P46654;P32905	P46654;P32905	2;2	2;2	2;2	40S ribosomal protein S0-B;40S ribosomal protein S0-A	RPS0B;RPS0A	;	2	2	2	2	0	0	0	0	1	1	0	1	1	0	0	0	0	1	0	0	1	0	0	0	0	1	0	0	1	0	0	0	0	0	0	0	0	0	0	1	1	0
P32908	P32908	21	21	21	Structural maintenance of chromosomes protein 1	SMC1		1	21	21	21	0	0	0	1	2	6	3	7	9	7	1	12	12	7	16	13	7	5	6	6	5	10	10	11	4	12	12	7	8	2	7	0	0	0	1	2	6	3
P32911	P32911	2	2	2	Eukaryotic translation initiation factor eIF-1	SUI1		1	2	2	2	0	0	0	0	0	0	0	0	0	0	0	0	0	1	0	0	0	0	1	0	0	0	0	0	0	0	0	0	0	0	0	0	0	0	0	0	0	0
P33122	P33122	19	19	19	Serine-rich protein TYE7	TYE7		1	19	19	19	16	17	15	16	12	12	8	8	7	4	2	4	2	4	8	1	2	1	5	0	2	3	1	2	0	1	0	2	0	0	0	16	17	15	16	12	12	8
P33201	P33201	2	2	2	Ribosome assembly factor MRT4	MRT4		1	2	2	2	0	0	0	0	0	0	0	0	0	0	0	0	1	1	1	0	0	0	0	0	0	0	0	0	0	0	0	0	1	0	1	0	0	0	0	0	0	0
P33202	P33202	2	2	2	Ubiquitin fusion degradation protein 4	UFD4		1	2	2	2	0	0	0	0	0	0	0	0	0	0	0	0	0	1	0	0	0	0	0	0	1	0	0	0	0	0	0	0	0	0	0	0	0	0	0	0	0	0
P33298	P33298	2	2	2	26S protease regulatory subunit 6B homolog	RPT3		1	2	2	2	0	0	0	0	0	0	0	0	0	0	0	0	0	1	1	1	0	1	0	0	1	1	1	0	0	1	1	1	1	0	0	0	0	0	0	0	0	0
P33303	P33303	8	8	8	Succinate/fumarate mitochondrial transporter	SFC1		1	8	8	8	0	1	2	0	4	4	5	2	4	4	4	0	1	7	0	2	2	3	1	4	5	5	4	1	4	2	4	4	1	0	4	0	1	2	0	4	4	5
P33307	P33307	1	1	1	Importin alpha re-exporter	CSE1		1	1	1	1	0	0	0	0	0	0	0	0	0	0	0	0	0	0	0	1	0	0	0	0	0	0	1	0	0	1	1	1	0	0	0	0	0	0	0	0	0	0
P33322	P33322	6	6	6	H/ACA ribonucleoprotein complex subunit 4	CBF5		1	6	6	6	5	5	3	4	4	4	2	3	3	3	3	2	1	2	4	3	4	3	4	0	1	4	2	3	0	3	4	2	4	1	0	5	5	3	4	4	4	2
P33327	P33327	1	1	1	NAD-specific glutamate dehydrogenase	GDH2		1	1	1	1	1	0	1	1	0	0	0	0	0	0	0	1	0	0	0	0	0	0	1	0	0	0	0	0	0	0	0	0	1	0	0	1	0	1	1	0	0	0
P33330	P33330	3	3	3	Phosphoserine aminotransferase	SER1		1	3	3	3	0	0	0	0	1	1	1	0	1	1	1	0	0	3	0	0	0	1	0	1	1	1	1	0	1	0	1	1	0	0	1	0	0	0	0	1	1	1
P33416	P33416	1	1	1	Heat shock protein 78, mitochondrial	HSP78		1	1	1	1	0	0	0	0	0	0	0	0	1	1	1	1	0	0	1	1	1	1	1	0	1	1	1	1	0	1	1	1	1	0	0	0	0	0	0	0	0	0
P33417	P33417	6	6	6	Intrastrand cross-link recognition protein	IXR1		1	6	6	6	1	1	1	1	0	0	0	2	1	0	1	1	1	1	2	1	1	1	1	0	2	1	1	1	0	1	1	1	2	0	0	1	1	1	1	0	0	0
P33442	P33442	18	9	9	40S ribosomal protein S1-A	RPS1A		1	18	9	9	12	10	11	9	10	11	10	9	11	8	9	10	5	9	10	10	9	9	11	4	10	10	10	9	7	9	7	8	7	2	4	7	6	7	7	6	7	6
P33748	P33748	3	3	3	Zinc finger protein MSN2	MSN2		1	3	3	3	0	0	0	0	0	0	1	1	1	2	1	0	1	3	1	1	0	1	0	1	1	1	0	1	1	1	1	1	1	0	2	0	0	0	0	0	0	1
P33749	P33749	2	2	2	Zinc finger protein MSN4	MSN4		1	2	2	2	1	0	1	1	1	2	2	1	1	1	1	1	2	1	2	0	1	0	0	0	1	2	1	1	1	0	1	0	1	1	0	1	0	1	1	1	2	2
P33755	P33755	4	4	4	Nuclear protein localization protein 4	NPL4		1	4	4	4	0	0	0	0	0	0	0	0	0	0	0	1	0	1	0	0	0	0	0	0	0	0	0	3	0	0	0	0	2	0	0	0	0	0	0	0	0	0
P33892	P33892	1	1	1	Translational activator GCN1	GCN1		1	1	1	1	1	1	1	1	1	0	1	1	1	1	1	1	0	0	1	1	1	0	1	0	1	1	0	1	0	1	1	1	1	0	0	1	1	1	1	1	0	1
P33893	P33893	3	3	3	Glutamyl-tRNA(Gln) amidotransferase subunit B, mitochondrial	PET112		1	3	3	3	2	2	2	2	1	1	1	1	1	1	2	0	0	0	0	1	1	0	0	0	0	0	0	1	0	0	0	0	0	0	0	2	2	2	2	1	1	1
P34087	P34087	1	1	1	DNA-directed RNA polymerase II subunit RPB7	RPB7		1	1	1	1	0	0	0	0	0	0	0	0	1	0	0	0	0	0	0	0	0	0	0	0	1	0	0	0	1	0	0	0	0	0	1	0	0	0	0	0	0	0
P34110	P34110	1	1	1	Vacuolar protein sorting-associated protein 35	VPS35		1	1	1	1	0	0	0	0	0	0	0	0	0	0	0	0	1	0	0	0	0	0	0	0	0	0	0	0	0	0	0	0	1	0	0	0	0	0	0	0	0	0
P34111	P34111	3	3	3	Transcription factor tau 138 kDa subunit	TFC3		1	3	3	3	3	1	3	1	2	3	2	1	3	1	2	2	2	1	3	3	2	1	2	2	1	2	3	1	1	3	3	3	1	1	2	3	1	3	1	2	3	2
P34163	P34163	2	2	2	Sterol esterase TGL1	TGL1		1	2	2	2	0	0	0	0	0	0	0	0	0	0	0	0	0	0	0	0	0	0	0	0	0	0	0	1	0	0	0	0	2	0	0	0	0	0	0	0	0	0
P34216	P34216	4	4	4	EH domain-containing and endocytosis protein 1	EDE1		1	4	4	4	0	0	0	0	0	0	0	0	0	0	0	0	0	1	2	1	0	0	1	0	1	0	1	4	0	1	1	1	0	0	1	0	0	0	0	0	0	0
P34219	P34219	4	4	4	Transcriptional regulatory protein TOD6	TOD6		1	4	4	4	2	4	4	3	2	4	3	0	2	1	2	0	1	1	2	2	4	1	0	1	1	2	0	2	1	2	4	3	2	1	3	2	4	4	3	2	4	3
P34226	P34226	1	1	1	Protein SKT5	SKT5		1	1	1	1	0	0	0	0	0	0	0	1	0	0	0	1	0	0	1	0	0	0	1	0	0	0	0	1	0	1	0	0	1	0	0	0	0	0	0	0	0	0
P34227	P34227	4	4	4	Mitochondrial peroxiredoxin PRX1	PRX1		1	4	4	4	1	1	1	1	2	2	2	2	2	2	2	2	0	2	1	2	2	2	2	0	2	1	2	2	0	2	2	2	1	0	0	1	1	1	1	2	2	2
P34228	P34228	9	9	9	Putative transcription factor SEF1	SEF1		1	9	9	9	4	3	6	3	4	3	4	3	5	6	1	2	3	4	5	5	4	3	6	4	6	3	6	3	3	5	4	5	2	0	3	4	3	6	3	4	3	4
P34240	P34240	2	2	2	Zinc-regulated transporter 3	ZRT3		1	2	2	2	0	0	0	0	0	0	0	0	0	0	0	0	0	0	0	0	0	0	0	0	0	0	0	2	0	0	0	0	0	0	0	0	0	0	0	0	0	0
P34243	P34243	2	2	2	DNA polymerase alpha-associated DNA helicase A	HCS1		1	2	2	2	0	0	0	1	0	0	0	1	0	0	0	0	0	1	0	0	0	0	1	0	0	0	0	1	0	0	0	0	0	0	0	0	0	0	1	0	0	0
P34247	P34247	1	1	1	U3 small nucleolar RNA-associated protein 11	UTP11		1	1	1	1	1	1	1	1	1	1	1	1	1	1	1	0	0	0	0	1	0	1	1	0	1	0	1	1	0	1	0	0	1	0	0	1	1	1	1	1	1	1
P34730	P34730	7	7	1	Protein BMH2	BMH2		1	7	7	1	1	2	2	2	0	2	2	2	1	1	3	1	1	3	2	1	2	3	1	1	3	2	3	2	0	1	1	3	1	0	1	1	2	2	2	0	2	2
P34756	P34756	6	6	6	1-phosphatidylinositol 3-phosphate 5-kinase FAB1	FAB1		1	6	6	6	4	4	5	2	4	4	5	1	5	4	4	0	1	4	2	5	5	4	3	4	5	4	5	3	3	5	4	5	4	2	4	4	4	5	2	4	4	5
P34760	P34760	13	13	13	Peroxiredoxin TSA1	TSA1		1	13	13	13	6	4	5	4	7	6	10	7	9	6	9	5	4	6	4	9	5	4	9	4	8	5	8	7	4	7	5	6	5	2	4	6	4	5	4	7	6	10
P34909	P34909	8	8	8	General negative regulator of transcription subunit 4	MOT2		1	8	8	8	5	5	4	6	3	3	4	6	3	4	5	4	3	2	2	3	4	4	5	3	4	4	4	5	3	3	4	3	5	3	3	5	5	4	6	3	3	4
P35176	P35176	5	5	5	Peptidyl-prolyl cis-trans isomerase D	CPR5		1	5	5	5	1	1	2	3	2	2	3	2	2	2	1	2	1	3	1	2	2	2	3	1	3	2	2	3	2	1	2	1	3	0	1	1	1	2	3	2	2	3
P35177	P35177	3	3	3	Transcriptional activator SPT7	SPT7		1	3	3	3	2	2	2	1	2	1	0	1	1	2	2	0	0	2	1	1	0	1	0	0	1	1	1	0	0	1	1	2	1	0	0	2	2	2	1	2	1	0
P35187	P35187	9	9	9	ATP-dependent helicase SGS1	SGS1		1	9	9	9	0	0	0	0	0	0	0	0	1	2	1	0	1	3	2	6	3	2	3	2	2	4	3	6	1	5	3	4	4	1	1	0	0	0	0	0	0	0
P35189	P35189	2	2	2	Transcription initiation factor TFIID subunit 14	TAF14		1	2	2	2	1	1	1	2	1	1	1	2	1	1	1	2	1	1	1	1	1	1	1	1	1	1	1	2	1	1	1	1	2	1	1	1	1	1	2	1	1	1
P35194	P35194	3	3	3	U3 small nucleolar RNA-associated protein 20	UTP20		1	3	3	3	1	1	1	1	1	1	1	1	1	1	1	1	0	1	1	1	1	2	1	1	2	1	1	1	1	2	1	2	2	0	1	1	1	1	1	1	1	1
P35201	P35201	2	2	2	Protein MIF2	MIF2		1	2	2	2	0	0	0	0	0	0	0	0	1	0	0	1	0	1	0	1	0	0	2	0	0	0	0	0	0	0	0	0	1	0	0	0	0	0	0	0	0	0
P35691	P35691	5	5	5	Translationally-controlled tumor protein homolog	TMA19		1	5	5	5	4	2	4	3	2	2	2	4	3	2	1	3	3	3	3	2	2	0	4	0	2	1	2	3	0	1	2	2	4	1	0	4	2	4	3	2	2	2
P35719	P35719	7	7	7	Uncharacterized protein MRP8	MRP8		1	7	7	7	4	2	2	2	1	2	2	2	2	1	2	2	1	2	1	2	4	1	4	2	1	3	2	2	2	4	2	3	3	1	1	4	2	2	2	1	2	2
P35732	P35732	3	3	3	RNA polymerase II degradation factor 1	DEF1		1	3	3	3	2	1	1	2	1	1	0	1	3	2	2	1	2	2	1	2	0	0	1	1	3	1	1	2	2	2	2	2	3	1	1	2	1	1	2	1	1	0
P35817	P35817	3	3	3	Bromodomain-containing factor 1	BDF1		1	3	3	3	3	3	3	3	2	2	2	2	2	2	2	2	2	1	2	3	1	2	3	1	2	1	2	2	1	2	2	2	1	0	2	3	3	3	3	2	2	2
P35845	P35845	2	2	2	Oxysterol-binding protein homolog 1	SWH1		1	2	2	2	0	0	0	0	0	0	0	0	0	0	0	0	0	2	0	0	0	0	0	0	0	0	0	0	0	0	0	0	0	0	0	0	0	0	0	0	0	0
P38711;P35997	P38711;P35997	5;5	5;5	5;5	40S ribosomal protein S27-B;40S ribosomal protein S27-A	RPS27B;RPS27A	;	2	5	5	5	4	4	4	4	5	5	5	5	4	5	5	5	4	4	5	4	5	4	3	5	5	4	4	4	4	4	5	5	5	3	3	4	4	4	4	5	5	5
P36004	P36004	4	4	4	Probable serine/threonine-protein kinase KKQ8	KKQ8		1	4	4	4	1	2	2	3	0	0	1	2	1	1	0	2	2	2	0	2	1	0	2	1	1	0	0	3	0	3	1	0	3	1	2	1	2	2	3	0	0	1
P36006;Q04439	P36006	7;2	7;2	7;2	Myosin-3	MYO3		2	7	7	7	0	0	0	0	0	0	1	0	0	0	0	0	0	5	1	1	0	0	0	1	0	0	0	1	0	0	0	1	2	0	1	0	0	0	0	0	0	1
P36008	P36008	5	5	4	Elongation factor 1-gamma 2	TEF4		1	5	5	4	1	0	0	2	1	2	2	1	2	2	1	1	0	2	1	0	0	1	1	1	1	2	2	2	1	0	0	0	0	0	1	1	0	0	2	1	2	2
P36010	P36010	1	1	1	Nucleoside diphosphate kinase	YNK1		1	1	1	1	0	0	0	0	0	0	0	0	0	0	0	0	0	1	0	0	0	0	0	0	0	0	0	0	0	0	0	0	0	0	0	0	0	0	0	0	0	0
P36012	P36012	1	1	1	Histone H3-like centromeric protein CSE4	CSE4		1	1	1	1	1	1	1	0	0	0	1	0	1	0	0	0	0	0	0	0	0	0	0	0	0	0	0	0	0	0	0	0	0	0	0	1	1	1	0	0	0	1
P36015	P36015	1	1	1	Synaptobrevin homolog YKT6	YKT6		1	1	1	1	0	0	0	0	0	0	0	0	0	0	0	0	0	0	0	0	0	0	0	0	1	0	0	0	1	0	0	1	0	0	1	0	0	0	0	0	0	0
P36026	P36026	8	8	8	Ubiquitin carboxyl-terminal hydrolase 11	UBP11		1	8	8	8	1	1	1	2	1	1	1	0	1	1	1	1	0	3	0	2	2	1	1	2	1	2	2	2	1	3	3	1	1	0	2	1	1	1	2	1	1	1
P36046	P36046	1	1	1	Mitochondrial intermembrane space import and assembly protein 40	MIA40		1	1	1	1	0	1	1	1	1	1	1	1	1	1	1	1	1	0	1	1	1	1	1	1	1	1	1	1	1	0	1	1	1	0	0	0	1	1	1	1	1	1
P36047	P36047	1	1	1	Protein phosphatase 1 regulatory subunit SDS22	SDS22		1	1	1	1	0	0	0	0	0	0	0	0	0	0	0	0	0	1	0	0	0	0	0	0	0	0	0	0	0	0	0	0	0	0	0	0	0	0	0	0	0	0
P36049	P36049	2	2	2	rRNA-processing protein EBP2	EBP2		1	2	2	2	1	1	1	1	1	0	1	0	1	1	0	0	0	0	2	1	1	0	1	0	1	1	0	1	0	1	1	0	0	0	1	1	1	1	1	1	0	1
P36059	P36059	1	1	1	ATP-dependent (S)-NAD(P)H-hydrate dehydratase			1	1	1	1	0	0	0	0	1	0	0	0	0	0	0	0	0	0	0	0	0	1	0	0	0	0	0	0	0	0	0	1	0	0	0	0	0	0	0	1	0	0
P36060	P36060	7	7	7	NADH-cytochrome b5 reductase 2;NADH-cytochrome b5 reductase p34 form;NADH-cytochrome b5 reductase p32 form	MCR1		1	7	7	7	2	3	2	3	3	3	4	2	3	3	2	1	0	4	3	2	4	3	2	1	4	2	3	0	2	2	4	2	1	0	2	2	3	2	3	3	3	4
P36069	P36069	3	3	3	Probable phosphomutase PMU1	PMU1		1	3	3	3	3	3	3	2	2	3	3	2	3	2	2	2	2	0	0	2	3	1	2	3	3	2	2	2	2	2	2	2	2	1	3	3	3	3	2	2	3	3
P36078	P36078	5	5	5	Helper of Tim protein 13	HOT13		1	5	5	5	3	2	2	3	2	2	3	4	3	2	2	2	0	0	1	2	2	2	3	2	2	2	1	3	2	2	2	1	4	0	2	3	2	2	3	2	2	3
P36080	P36080	1	1	1	Ribosomal RNA-processing protein 14	RRP14		1	1	1	1	0	0	0	0	0	0	0	0	0	0	0	0	0	0	0	0	0	0	0	0	0	0	1	0	0	0	0	0	0	0	0	0	0	0	0	0	0	0
P36081	P36081	2	2	2	Uncharacterized protein YKL077W	YKL077W		1	2	2	2	0	0	0	1	0	0	0	0	1	0	1	0	0	1	1	0	0	1	0	0	0	1	0	0	2	0	0	0	0	0	1	0	0	0	1	0	0	0
P36093	P36093	1	1	1	Putative transcription factor PHD1	PHD1		1	1	1	1	0	1	1	1	0	1	1	1	1	0	1	0	0	0	0	1	1	1	1	0	1	0	0	0	0	0	1	1	1	0	0	0	1	1	1	0	1	1
P36094	P36094	1	1	1	Spindle pole body component SPC42	SPC42		1	1	1	1	0	0	0	0	0	0	0	0	1	0	0	0	0	0	0	0	0	0	0	0	0	0	0	0	0	0	0	1	1	0	0	0	0	0	0	0	0	0
P36100	P36100	1	1	1	Transcription initiation factor IIE subunit alpha	TFA1		1	1	1	1	1	1	1	0	1	1	1	1	1	1	1	0	0	1	0	1	1	1	1	1	1	1	1	0	1	1	1	1	0	0	1	1	1	1	0	1	1	1
P38754;P36105	P38754;P36105	6;6	6;6	6;6	60S ribosomal protein L14-B;60S ribosomal protein L14-A	RPL14B;RPL14A	;	2	6	6	6	0	0	1	2	2	1	3	4	2	1	2	1	0	3	4	0	1	1	2	0	2	1	0	2	2	1	1	2	1	0	0	0	0	1	2	2	1	3
P36114	P36114	3	3	3	Mitochondrial outer membrane protein YKR018C	YKR018C		1	3	3	3	0	0	0	1	0	0	0	0	0	0	0	2	0	0	0	0	0	0	0	0	0	1	1	3	0	1	1	0	2	0	0	0	0	0	1	0	0	0
P36126	P36126	10	10	10	Phospholipase D1	SPO14		1	10	10	10	1	1	1	3	0	2	1	1	0	1	2	2	3	3	1	3	4	1	1	2	4	4	2	2	1	3	4	4	4	0	1	1	1	1	3	0	2	1
P36139	P36139	8	8	8	Protein PET10	PET10		1	8	8	8	2	4	4	3	2	3	1	4	3	2	2	3	2	5	2	2	3	2	6	2	6	4	3	5	1	4	4	3	5	0	3	2	4	4	3	2	3	1
P36145	P36145	6	6	6	Transcription initiation factor IIE subunit beta	TFA2		1	6	6	6	1	2	1	1	1	2	1	1	1	2	1	1	1	2	3	2	2	2	3	1	2	1	2	2	1	2	2	2	2	1	1	1	2	1	1	1	2	1
P36155	P36155	3	3	3	Uncharacterized protein YKR075C	YKR075C		1	3	3	3	0	0	1	2	0	0	0	0	0	0	0	0	0	0	0	0	0	0	0	0	0	0	0	0	0	0	0	0	0	0	0	0	0	1	2	0	0	0
P36156	P36156	9	9	9	Glutathione S-transferase omega-like 2	ECM4		1	9	9	9	6	6	7	6	7	6	8	5	6	6	7	4	4	0	1	6	6	5	5	3	6	5	5	6	1	6	5	6	5	3	3	6	6	7	6	7	6	8
P36157	P36157	2	2	2	Putative transcriptional activator MSA2	MSA2		1	2	2	2	1	1	1	1	1	1	2	1	1	0	2	1	1	1	0	1	1	1	1	0	1	1	0	1	1	1	0	1	1	0	1	1	1	1	1	1	1	2
P36159	P36159	2	2	2	Ribonuclease Z	TRZ1		1	2	2	2	0	0	0	0	0	1	0	0	0	0	0	0	1	0	0	2	0	0	0	0	1	0	0	1	0	1	1	0	2	0	0	0	0	0	0	0	1	0
P36421	P36421	2	2	2	Tyrosine--tRNA ligase, cytoplasmic	TYS1		1	2	2	2	0	0	0	2	0	0	0	2	0	0	0	2	0	1	0	0	0	0	1	0	0	0	0	1	0	0	0	0	0	0	0	0	0	0	2	0	0	0
P37263	P37263	1	1	1	UPF0743 protein YCR087C-A			1	1	1	1	0	0	1	0	0	0	0	0	1	0	0	0	0	0	1	1	0	0	0	0	0	0	0	0	0	0	1	0	0	0	0	0	0	1	0	0	0	0
P37291	P37291	32	32	32	Serine hydroxymethyltransferase, cytosolic	SHM2		1	32	32	32	21	16	24	22	19	19	23	19	16	17	14	12	17	8	12	16	16	11	18	12	15	14	14	17	9	13	13	10	22	11	9	21	16	24	22	19	19	23
P37292	P37292	3	3	3	Serine hydroxymethyltransferase, mitochondrial	SHM1		1	3	3	3	1	1	1	1	1	1	2	2	1	1	2	1	1	1	0	0	1	2	1	0	1	0	0	2	1	1	1	1	1	0	1	1	1	1	1	1	1	2
P38009;P54113	P38009	4;1	4;1	4;1	Bifunctional purine biosynthesis protein ADE17;Phosphoribosylaminoimidazolecarboxamide formyltransferase;IMP cyclohydrolase	ADE17		2	4	4	4	0	0	0	0	1	1	2	1	1	1	2	0	0	1	0	0	1	0	0	0	1	2	0	0	2	0	0	2	0	0	0	0	0	0	0	1	1	2
P38011	P38011	19	19	19	Guanine nucleotide-binding protein subunit beta-like protein	ASC1		1	19	19	19	2	1	3	4	5	4	7	5	8	5	5	3	2	8	4	2	3	3	4	2	3	4	2	3	5	2	3	3	5	0	2	2	1	3	4	5	4	7
P38013	P38013	3	3	3	Peroxiredoxin type-2	AHP1		1	3	3	3	2	1	1	1	1	0	1	2	0	2	1	0	0	0	0	0	0	0	1	0	1	0	0	2	0	0	0	0	1	1	0	2	1	1	1	1	0	1
P38041	P38041	11	11	11	Protein BOB1	BOI1		1	11	11	11	1	6	4	4	2	3	3	3	1	1	3	2	2	7	1	2	3	3	3	2	2	0	1	3	2	0	3	1	2	0	2	1	6	4	4	2	3	3
P38061	P38061	23	23	23	60S ribosomal protein L32	RPL32		1	23	23	23	13	11	12	9	14	12	15	14	13	12	14	11	9	10	9	8	13	15	14	9	12	12	12	13	9	9	9	13	17	4	9	13	11	12	9	14	12	15
P38071	P38071	3	3	3	Enoyl-[acyl-carrier protein] reductase [NADPH, B-specific], mitochondrial	ETR1		1	3	3	3	0	0	0	0	1	2	2	1	2	2	2	1	0	0	0	1	2	2	1	0	2	2	1	0	0	1	2	2	0	0	0	0	0	0	0	1	2	2
P38077	P38077	3	3	3	ATP synthase subunit gamma, mitochondrial	ATP3		1	3	3	3	1	1	1	1	1	1	1	1	1	1	2	1	1	0	0	1	1	1	1	1	1	1	1	1	2	1	1	1	1	1	1	1	1	1	1	1	1	1
P38081	P38081	1	1	1	Uncharacterized glycosyl hydrolase YBR056W			1	1	1	1	0	0	0	0	0	0	1	1	1	1	0	0	0	0	0	0	0	1	1	1	0	1	1	1	0	1	0	1	0	0	0	0	0	0	0	0	0	1
P38082	P38082	2	2	2	Probable transcriptional regulator NRG2	NRG2		1	2	2	2	1	0	2	0	0	0	0	0	0	0	0	0	0	0	0	0	0	0	0	0	0	0	0	0	0	0	0	0	0	0	0	1	0	2	0	0	0	0
P38089	P38089	1	1	1	Protein phosphatase 2C homolog 4	PTC4		1	1	1	1	0	0	0	1	1	1	1	1	0	0	0	0	0	0	0	1	1	0	1	0	0	0	1	1	0	1	0	0	0	0	0	0	0	0	1	1	1	1
P38111	P38111	2	2	2	Serine/threonine-protein kinase MEC1	MEC1		1	2	2	2	1	0	1	1	1	0	1	1	1	1	1	1	1	1	1	1	1	0	1	1	1	1	1	1	1	1	0	1	1	0	1	1	0	1	1	1	0	1
P38115	P38115	7	7	7	D-arabinose dehydrogenase [NAD(P)+] heavy chain	ARA1		1	7	7	7	1	1	1	2	3	1	5	2	4	4	2	1	1	1	1	1	3	2	2	0	3	1	0	2	1	3	0	0	0	0	1	1	1	1	2	3	1	5
P38121	P38121	3	3	3	DNA polymerase alpha subunit B	POL12		1	3	3	3	1	1	1	1	2	2	1	1	1	2	2	2	1	2	1	1	1	1	2	0	1	1	1	1	0	1	1	1	1	0	0	1	1	1	1	2	2	1
P38126	P38126	2	2	2	Pachytene checkpoint protein 2	PCH2		1	2	2	2	0	0	0	0	0	0	0	0	1	0	0	0	0	1	0	0	0	0	1	0	0	0	0	0	0	0	0	0	1	0	0	0	0	0	0	0	0	0
P38137	P38137	2	2	2	Peroxisomal-coenzyme A synthetase	PCS60		1	2	2	2	0	0	0	0	2	1	2	1	1	2	1	1	0	1	0	1	1	2	1	0	2	1	1	1	1	1	1	2	0	0	0	0	0	0	0	2	1	2
P38144	P38144	6	6	6	ISWI chromatin-remodeling complex ATPase ISW1	ISW1		1	6	6	6	1	2	1	2	1	1	1	1	1	1	0	1	1	3	0	1	0	0	2	0	0	0	1	0	0	1	2	3	1	0	0	1	2	1	2	1	1	1
P38151	P38151	1	1	1	PAB1-binding protein 2	PBP2		1	1	1	1	0	0	0	0	0	0	0	0	0	0	0	0	0	0	0	1	0	0	1	0	1	1	1	1	0	1	0	0	1	0	0	0	0	0	0	0	0	0
P38170	P38170	19	19	19	Condensin complex subunit 2	BRN1		1	19	19	19	8	7	9	6	7	6	6	4	5	9	7	6	6	8	10	11	8	7	6	2	9	10	9	7	3	9	9	7	6	0	2	8	7	9	6	7	6	6
P38172	P38172	3	3	3	Uncharacterized protein YBL095W, mitochondrial			1	3	3	3	1	0	0	0	2	2	2	2	2	1	1	1	0	1	1	2	2	1	2	0	1	0	2	3	0	2	2	0	2	1	0	1	0	0	0	2	2	2
P38177	P38177	2	2	2	Uncharacterized protein YBL086C			1	2	2	2	2	2	2	2	1	2	2	2	2	1	2	2	1	0	0	1	1	1	2	1	2	2	2	2	1	1	1	1	2	0	1	2	2	2	2	1	2	2
P38182	P38182	3	3	3	Autophagy-related protein 8	ATG8		1	3	3	3	0	1	0	0	0	1	1	0	1	1	2	0	0	2	0	2	2	1	2	1	3	2	1	2	1	1	2	3	1	0	2	0	1	0	0	0	1	1
P38199	P38199	3	3	2	Heterogeneous nuclear rnp K-like protein 2	HEK2		1	3	3	2	0	0	0	0	0	0	1	1	0	0	0	0	0	0	0	0	0	1	0	0	1	0	0	0	0	0	0	2	0	0	0	0	0	0	0	0	0	1
P38204	P38204	2	2	2	RNA polymerase I-specific transcription initiation factor RRN10	RRN10		1	2	2	2	1	2	2	2	1	2	2	1	2	2	2	1	1	1	0	2	2	0	1	1	0	1	1	1	0	0	1	0	0	0	0	1	2	2	2	1	2	2
P38210	P38210	3	3	3	Chromatin structure-remodeling complex protein RSC14	LDB7		1	3	3	3	2	1	2	2	2	2	1	2	2	2	2	1	2	1	2	1	3	2	3	2	1	1	2	3	1	1	2	2	3	1	1	2	1	2	2	2	2	1
P38219	P38219	1	1	1	Obg-like ATPase 1	OLA1		1	1	1	1	0	0	0	0	0	0	0	0	0	0	0	0	0	0	0	1	0	0	0	1	0	0	1	0	0	1	1	0	0	0	0	0	0	0	0	0	0	0
P38230	P38230	3	3	3	Probable quinone oxidoreductase	ZTA1		1	3	3	3	1	1	1	1	2	1	1	1	1	1	1	1	0	1	1	0	0	1	1	0	1	0	0	0	1	0	0	0	0	0	1	1	1	1	1	2	1	1
P38250	P38250	8	8	8	Increased sodium tolerance protein 2	IST2		1	8	8	8	0	0	3	0	1	1	5	0	0	1	1	0	2	4	6	2	2	4	0	4	2	2	1	2	3	1	3	4	2	1	4	0	0	3	0	1	1	5
P38256	P38256	1	1	1	Uncharacterized protein YBR096W			1	1	1	1	0	0	0	1	0	0	0	0	0	0	0	1	0	0	0	0	0	0	0	0	0	0	0	1	0	0	0	0	0	0	0	0	0	0	1	0	0	0
P38271	P38271	19	19	19	Protein OPY1	OPY1		1	19	19	19	11	13	17	11	11	13	13	9	10	11	13	11	6	8	7	10	10	9	11	7	11	9	11	11	5	11	12	10	12	4	8	11	13	17	11	11	13	13
P38276	P38276	2	2	2	UPF0303 protein YBR137W			1	2	2	2	1	1	1	1	2	0	2	0	1	1	2	1	0	1	1	1	1	1	1	0	1	1	1	1	1	1	1	0	1	0	0	1	1	1	1	2	0	2
P38283	P38283	6	6	6	Inner centromere protein-related protein SLI15	SLI15		1	6	6	6	4	3	5	4	3	2	3	2	2	0	2	0	1	3	2	1	0	0	2	1	1	2	1	1	0	2	1	3	1	0	1	4	3	5	4	3	2	3
P38286	P38286	2	2	2	Very-long-chain 3-oxoacyl-CoA reductase	IFA38		1	2	2	2	0	1	0	0	0	0	0	0	0	0	0	1	0	2	1	0	0	0	0	0	0	0	0	0	0	1	0	0	1	0	0	0	1	0	0	0	0	0
P38289	P38289	2	2	2	Exonuclease V, mitochondrial	EXO5		1	2	2	2	0	0	1	0	0	0	0	0	1	0	0	0	0	1	0	0	0	0	0	0	0	0	0	0	0	0	0	0	0	0	0	0	0	1	0	0	0	0
P38314	P38314	3	3	3	Protein SDS24	SDS24		1	3	3	3	0	0	0	1	1	0	3	1	2	2	0	0	1	2	0	0	1	1	0	1	1	1	0	0	1	0	1	1	1	0	1	0	0	0	1	1	0	3
P38321	P38321	15	15	15	Uncharacterized protein YBR225W			1	15	15	15	4	5	6	8	4	4	4	5	4	3	4	4	6	2	3	3	5	5	4	5	5	5	6	6	2	4	6	5	6	3	5	4	5	6	8	4	4	4
P38325	P38325	5	5	5	Mitochondrial outer membrane protein OM14	OM14		1	5	5	5	2	3	2	1	3	4	4	4	2	3	2	2	3	2	0	2	4	2	3	2	3	2	2	2	2	2	2	2	3	3	1	2	3	2	1	3	4	4
P38326	P38326	1	1	1	SWR1-complex protein 5	SWC5		1	1	1	1	0	0	0	0	0	0	1	0	1	0	0	0	1	0	1	0	0	0	1	0	0	0	0	0	0	0	1	1	1	0	0	0	0	0	0	0	0	1
P38330	P38330	3	3	3	Protein RMD9-like, mitochondrial			1	3	3	3	1	1	1	2	0	0	0	1	1	1	0	0	1	0	0	0	0	0	1	0	1	0	1	1	0	1	1	0	1	0	0	1	1	1	2	0	0	0
P38338	P38338	1	1	1	Uncharacterized protein YBR259W			1	1	1	1	0	0	0	0	0	0	0	0	0	0	0	0	0	0	0	1	0	1	0	0	1	1	1	0	0	1	0	1	0	0	0	0	0	0	0	0	0	0
P38351	P38351	6	6	6	RNA polymerase II-associated protein 1	PAF1		1	6	6	6	3	3	4	4	3	3	4	4	4	3	4	4	3	4	3	2	4	4	4	4	3	2	2	4	2	2	4	4	4	0	4	3	3	4	4	3	3	4
P38430	P38430	2	2	2	Uncharacterized deoxyribonuclease YMR262W			1	2	2	2	1	0	1	0	1	1	1	1	1	0	0	2	1	0	0	1	1	1	1	1	1	1	1	1	1	1	1	1	1	1	1	1	0	1	0	1	1	1
P38431	P38431	2	2	2	Eukaryotic translation initiation factor 5	TIF5		1	2	2	2	0	0	0	1	0	0	0	0	0	0	0	0	0	2	0	0	0	0	1	0	0	0	0	1	0	0	0	0	0	0	0	0	0	0	1	0	0	0
P38439	P38439	2	2	2	RNA polymerase-associated protein LEO1	LEO1		1	2	2	2	1	1	1	0	0	0	0	0	1	1	0	0	0	0	2	0	0	0	0	0	0	0	0	0	0	1	0	0	0	0	0	1	1	1	0	0	0	0
P38523	P38523	2	2	2	GrpE protein homolog, mitochondrial	MGE1		1	2	2	2	1	1	1	1	1	1	1	1	1	1	1	1	1	2	1	1	1	1	1	1	1	1	1	1	1	1	1	1	0	0	0	1	1	1	1	1	1	1
P38625	P38625	3	3	3	GMP synthase [glutamine-hydrolyzing]	GUA1		1	3	3	3	0	0	0	0	0	0	0	0	0	0	0	0	0	1	1	0	0	0	0	0	0	1	0	0	0	0	0	0	0	0	0	0	0	0	0	0	0	0
P38627	P38627	3	2	2	CTP synthase 2	URA8		1	3	2	2	1	0	2	2	2	1	2	2	1	1	2	2	1	2	0	2	2	2	2	0	3	2	1	2	0	2	1	2	3	1	0	0	0	1	1	1	0	1
P38630	P38630	2	2	2	Replication factor C subunit 1	RFC1		1	2	2	2	1	1	1	0	1	1	1	2	0	0	1	2	2	1	1	1	1	0	1	0	1	1	0	1	0	1	1	1	1	0	1	1	1	1	0	1	1	1
P38635	P38635	13	13	13	Histidinol-phosphatase	HIS2		1	13	13	13	6	6	9	8	2	2	2	7	1	2	2	4	5	0	1	3	3	1	6	2	2	1	3	5	1	3	2	1	7	3	2	6	6	9	8	2	2	2
P38636	P38636	1	1	1	Metal homeostasis factor ATX1	ATX1		1	1	1	1	0	0	0	1	0	0	0	1	0	0	0	0	0	1	1	0	0	0	1	0	0	0	0	1	0	0	0	0	1	0	0	0	0	0	1	0	0	0
P38688	P38688	2	2	2	Signal recognition particle subunit SRP72	SRP72		1	2	2	2	0	0	0	1	0	0	0	0	0	0	0	0	0	1	0	0	0	0	0	0	0	0	0	0	0	0	0	0	0	0	0	0	0	0	1	0	0	0
P38701	P38701	7	7	7	40S ribosomal protein S20	RPS20		1	7	7	7	4	4	4	5	4	6	4	2	5	3	3	2	3	4	6	4	3	3	4	3	4	2	3	5	5	3	3	4	5	1	4	4	4	4	5	4	6	4
P38707	P38707	3	3	3	Asparagine--tRNA ligase, cytoplasmic	DED81		1	3	3	3	0	0	0	1	0	1	1	1	1	1	1	0	0	1	0	0	1	1	1	0	1	1	1	1	0	0	0	1	1	0	0	0	0	0	1	0	1	1
P38713	P38713	9	9	9	Oxysterol-binding protein homolog 3	OSH3		1	9	9	9	2	2	4	4	1	2	2	3	1	2	2	2	1	2	4	4	2	0	3	1	2	0	3	5	1	2	3	1	6	0	1	2	2	4	4	1	2	2
P38715	P38715	3	3	3	NADPH-dependent aldose reductase GRE3	GRE3		1	3	3	3	0	0	0	0	2	2	2	1	1	1	1	0	0	1	0	0	1	2	2	1	2	1	2	1	0	0	1	1	1	0	0	0	0	0	0	2	2	2
P38720	P38720	1	1	1	6-phosphogluconate dehydrogenase, decarboxylating 1	GND1		1	1	1	1	0	0	0	0	0	0	0	0	0	0	0	0	0	1	0	0	0	0	0	0	0	0	0	0	0	0	0	0	0	0	0	0	0	0	0	0	0	0
P38741	P38741	33	33	33	Meiotic activator RIM4	RIM4		1	33	33	33	6	8	8	11	23	20	23	17	23	22	23	18	17	7	12	21	21	24	20	12	22	24	22	23	11	19	25	23	28	14	15	6	8	8	11	23	20	23
P38742	P38742	5	5	5	Nitrogen permease regulator 3	NPR3		1	5	5	5	1	1	2	2	1	1	0	1	1	2	0	1	0	1	0	3	2	1	0	0	1	1	1	2	0	3	2	2	3	1	2	1	1	2	2	1	1	0
P38744	P38744	7	7	7	Putative pterin-4-alpha-carbinolamine dehydratase	YHL018W		1	7	7	7	4	3	6	5	2	5	4	4	3	2	4	3	3	3	2	3	3	1	2	4	4	2	2	3	3	3	3	1	5	1	2	4	3	6	5	2	5	4
P38755	P38755	2	2	2	Oxysterol-binding protein homolog 7	OSH7		1	2	2	2	0	0	0	0	0	0	2	0	0	1	1	0	0	1	0	0	0	0	0	0	1	0	0	0	0	0	1	0	0	0	0	0	0	0	0	0	0	2
P38758	P38758	2	2	2	Putative oxidoreductase TDA3	TDA3		1	2	2	2	1	0	1	0	1	1	1	0	1	1	1	0	0	1	0	0	1	1	0	0	0	0	0	0	0	0	0	0	0	0	0	1	0	1	0	1	1	1
P38764	P38764	5	5	5	26S proteasome regulatory subunit RPN1	RPN1		1	5	5	5	0	0	0	1	0	0	0	1	0	0	0	1	0	0	1	1	1	0	1	0	2	3	2	1	0	2	1	1	1	0	1	0	0	0	1	0	0	0
P38791	P38791	1	1	1	Deoxyhypusine synthase	DYS1		1	1	1	1	0	0	0	0	1	0	0	0	0	0	0	0	0	1	0	0	0	0	0	0	1	1	0	0	0	0	0	0	0	0	0	0	0	0	0	1	0	0
P38793	P38793	5	5	5	tRNA (guanine(37)-N1)-methyltransferase	TRM5		1	5	5	5	4	4	4	2	3	3	2	1	4	2	1	1	2	1	0	2	3	1	0	1	2	2	2	1	0	2	2	0	2	0	1	4	4	4	2	3	3	2
P38804	P38804	1	1	1	Restriction of telomere capping protein 3	RTC3		1	1	1	1	0	0	0	0	0	0	0	0	0	0	0	0	0	1	1	0	0	0	0	0	0	0	0	0	0	0	0	0	0	0	0	0	0	0	0	0	0	0
P38809;Q05518	P38809	15;1	15;1	15;1	Uncharacterized protein YHR097C	YHR097C		2	15	15	15	5	5	9	13	6	4	12	11	4	4	6	7	6	7	9	5	7	8	9	4	4	5	5	6	4	5	5	8	7	3	5	5	5	9	13	6	4	12
P38811	P38811	5	5	5	Transcription-associated protein 1	TRA1		1	5	5	5	2	1	1	2	1	2	2	0	1	1	1	0	1	3	0	2	1	1	0	0	1	1	1	0	0	1	2	1	1	0	1	2	1	1	2	1	2	2
P38816	P38816	2	2	1	Thioredoxin reductase 2, mitochondrial	TRR2		1	2	2	1	0	0	1	0	1	0	0	1	0	0	0	0	0	1	1	1	0	0	1	0	1	1	1	1	0	1	1	0	1	1	0	0	0	1	0	1	0	0
P38817	P38817	3	3	3	ADP-ribosylation factor-binding protein GGA2	GGA2		1	3	3	3	2	3	1	1	1	2	1	1	2	1	1	1	0	1	0	2	2	1	1	0	2	0	2	1	0	1	0	0	0	0	0	2	3	1	1	1	2	1
P38821	P38821	4	4	4	Aspartyl aminopeptidase 4	APE4		1	4	4	4	0	1	2	0	1	3	2	0	1	0	1	0	0	1	0	0	0	0	0	0	1	1	0	1	0	0	0	0	0	0	0	0	1	2	0	1	3	2
P38827	P38827	3	3	3	Histone-lysine N-methyltransferase, H3 lysine-4 specific	SET1		1	3	3	3	0	0	1	1	0	0	0	1	0	0	0	2	0	1	2	1	0	0	3	0	1	0	2	2	1	1	2	2	1	0	1	0	0	1	1	0	0	0
P38836	P38836	7	7	7	Putative metallocarboxypeptidase ECM14	ECM14		1	7	7	7	5	5	4	4	4	5	5	4	5	6	5	4	4	2	3	7	6	2	4	3	5	4	5	4	2	6	5	5	5	3	4	5	5	4	4	4	5	5
P38840	P38840	2	2	2	Aromatic amino acid aminotransferase 2	ARO9		1	2	2	2	0	0	0	1	0	0	1	1	1	1	0	1	1	2	0	0	0	1	1	0	1	1	0	1	1	0	1	1	1	0	1	0	0	0	1	0	0	1
P38862	P38862	1	1	1	Ubiquitin-like modifier-activating enzyme ATG7	ATG7		1	1	1	1	0	1	0	0	1	1	0	0	0	0	1	0	0	0	1	1	1	0	1	0	1	0	1	1	0	1	0	1	0	0	0	0	1	0	0	1	1	0
P38871	P38871	2	2	2	Sporulation-specific protein 1	SSP1		1	2	2	2	0	0	0	1	0	0	0	1	0	0	0	1	0	0	0	0	0	0	1	1	0	0	0	1	1	2	2	2	2	0	0	0	0	0	1	0	0	0
P38879	P38879	7	7	7	Nascent polypeptide-associated complex subunit alpha	EGD2		1	7	7	7	4	1	3	4	3	1	2	3	2	2	2	2	0	2	4	1	1	1	6	1	0	0	2	5	0	0	2	1	4	0	1	4	1	3	4	3	1	2
P38884	P38884	1	1	1	Altered inheritance of mitochondria protein 18, mitochondrial	AIM18		1	1	1	1	1	1	1	1	1	1	1	1	1	1	1	1	1	1	1	1	1	1	1	1	1	1	1	1	1	1	1	1	1	0	1	1	1	1	1	1	1	1
P38886	P38886	1	1	1	26S proteasome regulatory subunit RPN10	RPN10		1	1	1	1	0	0	0	0	0	0	0	0	0	0	1	0	0	0	0	0	0	0	0	0	1	0	0	0	1	1	1	1	0	0	0	0	0	0	0	0	0	0
P38887	P38887	16	16	16	Uncharacterized protein YHR202W	YHR202W		1	16	16	16	1	1	1	2	2	4	6	6	7	6	4	5	2	2	0	10	7	4	9	4	9	10	8	12	1	9	11	7	13	2	3	1	1	1	2	2	4	6
P38890	P38890	4	4	4	Putative protein lysine methyltransferase SET5	SET5		1	4	4	4	0	0	1	2	0	0	0	2	0	0	0	1	1	0	0	0	0	0	1	0	0	0	0	4	0	0	0	0	4	0	0	0	0	1	2	0	0	0
P38891	P38891	1	1	1	Branched-chain-amino-acid aminotransferase, mitochondrial	BAT1		1	1	1	1	1	0	0	0	0	0	1	0	1	1	1	0	0	0	0	0	0	0	0	0	0	1	0	0	0	0	0	0	0	0	0	1	0	0	0	0	0	1
P38904	P38904	14	14	14	Protein SPP41	SPP41		1	14	14	14	5	3	6	3	4	3	4	4	7	6	3	2	3	7	8	6	3	2	3	1	5	3	3	3	1	7	2	4	2	0	1	5	3	6	3	4	3	4
P38910	P38910	3	3	3	10 kDa heat shock protein, mitochondrial	HSP10		1	3	3	3	3	2	3	2	1	2	1	3	2	1	1	2	0	0	2	1	1	1	1	0	0	0	1	1	1	0	2	1	1	0	0	3	2	3	2	1	2	1
P38911	P38911	1	1	1	FK506-binding nuclear protein	FPR3		1	1	1	1	1	1	1	0	1	1	1	0	1	1	1	0	1	0	1	1	1	1	0	1	1	1	1	1	0	1	1	1	0	0	1	1	1	1	0	1	1	1
P38912	P38912	2	2	2	Eukaryotic translation initiation factor 1A	TIF11		1	2	2	2	1	0	0	0	0	1	0	0	0	0	0	0	0	1	1	1	0	0	1	0	0	0	0	0	0	0	1	1	1	0	0	1	0	0	0	0	1	0
P38934	P38934	4	4	4	Nuclear segregation protein BFR1	BFR1		1	4	4	4	0	0	0	1	0	0	0	2	0	0	0	1	1	0	2	0	0	0	2	0	0	0	0	3	0	0	0	0	2	0	0	0	0	0	1	0	0	0
P38970	P38970	7	7	7	Serine/threonine-protein kinase HAL5	HAL5		1	7	7	7	3	2	2	7	1	1	1	3	1	1	0	5	1	1	0	1	0	0	5	1	0	0	0	5	0	1	0	0	3	0	1	3	2	2	7	1	1	1
P38989	P38989	5	5	5	Structural maintenance of chromosomes protein 2	SMC2		1	5	5	5	1	1	1	1	1	0	1	1	0	0	0	2	1	1	1	3	0	0	2	0	0	0	1	2	0	2	2	2	3	0	0	1	1	1	1	1	0	1
P38991	P38991	1	1	1	Spindle assembly checkpoint kinase	IPL1		1	1	1	1	0	0	1	0	0	0	0	0	0	1	0	0	0	1	0	0	0	0	0	1	0	0	0	0	0	0	0	0	0	0	0	0	0	1	0	0	0	0
P38993	P38993	5	5	5	Iron transport multicopper oxidase FET3	FET3		1	5	5	5	2	4	4	4	2	4	3	3	2	3	3	3	1	1	0	2	3	2	2	2	2	3	1	3	2	2	3	2	3	0	2	2	4	4	4	2	4	3
P38994	P38994	13	13	13	Probable phosphatidylinositol 4-phosphate 5-kinase MSS4	MSS4		1	13	13	13	5	6	5	7	6	7	7	4	7	10	10	3	8	6	3	8	8	6	7	5	7	7	7	9	3	8	10	9	9	1	6	5	6	5	7	6	7	7
P38998	P38998	1	1	1	Saccharopine dehydrogenase [NAD(+), L-lysine-forming]	LYS1		1	1	1	1	1	1	0	1	1	1	1	1	1	1	0	0	0	0	0	0	0	0	0	0	0	1	0	0	0	0	0	0	0	0	0	1	1	0	1	1	1	1
P38999	P38999	1	1	1	Saccharopine dehydrogenase [NADP(+), L-glutamate-forming]	LYS9		1	1	1	1	0	0	0	0	0	0	0	0	0	0	0	0	0	1	0	0	0	0	0	0	0	0	0	0	0	0	0	0	0	0	0	0	0	0	0	0	0	0
P39001	P39001	4	4	4	Transcriptional regulatory protein UME6	UME6		1	4	4	4	2	2	2	1	2	2	2	2	2	2	2	1	1	2	3	2	2	2	3	1	2	1	2	2	1	1	2	2	0	0	1	2	2	2	1	2	2	2
P39006	P39006	2	2	2	Phosphatidylserine decarboxylase proenzyme 1, mitochondrial;Phosphatidylserine decarboxylase 1 beta chain;Phosphatidylserine decarboxylase 1 alpha chain	PSD1		1	2	2	2	1	0	1	0	1	1	1	0	0	1	0	0	0	2	0	1	0	0	0	0	1	0	1	0	0	1	0	1	0	0	0	1	0	1	0	1	1	1
P39015	P39015	6	6	6	Suppressor protein STM1	STM1		1	6	6	6	1	1	1	2	1	1	0	1	1	1	1	1	2	3	1	2	1	1	5	1	1	1	2	3	1	1	1	1	2	1	1	1	1	1	2	1	1	0
P39016	P39016	4	4	4	Suppressor protein MPT5	MPT5		1	4	4	4	1	1	1	1	1	1	2	1	1	1	1	1	2	4	1	2	2	1	0	1	3	2	3	2	1	3	3	3	2	0	2	1	1	1	1	1	1	2
P39073	P39073	5	5	5	Meiotic mRNA stability protein kinase SSN3	SSN3		1	5	5	5	2	2	2	4	2	2	1	2	2	2	1	1	1	2	0	2	1	1	1	2	2	1	1	2	2	1	2	1	2	1	2	2	2	2	4	2	2	1
P39081	P39081	1	1	1	Protein PCF11	PCF11		1	1	1	1	0	0	0	0	0	0	0	0	0	0	0	0	0	0	1	0	0	0	1	0	0	0	0	0	0	0	0	0	1	0	0	0	0	0	0	0	0	0
P39083	P39083	2	2	2	Rho-type GTPase-activating protein 1	RGA1		1	2	2	2	0	0	0	0	0	0	0	0	0	1	0	0	0	0	0	0	1	0	1	1	1	0	0	1	1	1	0	1	0	0	0	0	0	0	0	0	0	0
P39106	P39106	1	1	1	Alpha-1,3-mannosyltransferase MNN1	MNN1		1	1	1	1	0	0	0	1	0	0	0	1	0	0	0	1	0	0	0	0	0	0	1	0	0	0	0	1	0	0	0	0	1	0	0	0	0	0	1	0	0	0
P39107	P39107	1	1	1	Mannan polymerase complexes subunit MNN9	MNN9		1	1	1	1	0	0	0	0	0	0	0	1	0	0	0	1	0	0	0	0	0	0	1	0	0	0	0	1	0	0	0	0	0	0	0	0	0	0	0	0	0	0
P39113	P39113	2	2	2	Regulatory protein CAT8	CAT8		1	2	2	2	1	0	1	1	1	1	1	1	1	0	0	1	0	1	2	1	0	0	2	0	1	0	1	0	0	2	1	1	1	0	1	1	0	1	1	1	1	1
P39518	P39518	2	2	2	Long-chain-fatty-acid--CoA ligase 2	FAA2		1	2	2	2	0	0	0	0	0	0	0	0	0	0	0	0	0	2	0	0	0	0	0	0	0	0	0	0	0	0	0	0	0	0	0	0	0	0	0	0	0	0
P39521	P39521	8	8	8	Pre-rRNA-processing protein FHL1	FHL1		1	8	8	8	7	1	4	2	3	1	2	1	5	1	2	1	3	3	3	4	3	3	4	0	4	3	3	2	0	4	3	3	1	0	1	7	1	4	2	3	1	2
P39522	P39522	2	2	2	Dihydroxy-acid dehydratase, mitochondrial	ILV3		1	2	2	2	0	0	0	0	0	0	0	0	0	0	0	0	0	2	0	0	0	0	0	0	0	0	0	0	0	0	0	0	0	0	0	0	0	0	0	0	0	0
P39676	P39676	4	4	4	Flavohemoprotein	YHB1		1	4	4	4	1	0	0	1	2	2	3	2	1	1	1	2	1	2	0	1	0	0	2	0	0	0	0	2	0	0	1	0	1	0	0	1	0	0	1	2	2	3
P39705	P39705	10	10	10	Nucleoporin NUP60	NUP60		1	10	10	10	2	3	4	4	5	2	1	4	2	0	0	4	3	2	6	4	2	1	6	1	1	3	3	5	0	0	1	1	4	0	1	2	3	4	4	5	2	1
P39708;P07262	P39708;P07262	2;1	2;1	2;1	NADP-specific glutamate dehydrogenase 2;NADP-specific glutamate dehydrogenase 1	GDH3;GDH1	;	2	2	2	2	0	0	0	0	1	1	1	0	1	1	1	0	0	0	0	0	1	1	1	0	1	1	1	0	1	0	1	1	0	0	1	0	0	0	0	1	1	1
P39713	P39713	3	3	3	Probable diacetyl reductase [(R)-acetoin forming] 2	BDH2		1	3	3	3	2	1	1	1	0	1	0	1	1	0	0	0	1	0	0	0	0	0	1	1	1	0	0	1	1	0	0	0	1	0	1	2	1	1	1	0	1	0
P39714	P39714	9	9	9	(R,R)-butanediol dehydrogenase	BDH1		1	9	9	9	4	3	3	3	4	5	4	4	3	3	1	3	4	1	1	3	3	1	7	2	4	1	2	3	0	2	1	0	5	2	0	4	3	3	3	4	5	4
P39715	P39715	2	2	2	Shuttling pre-60S factor ECM1	ECM1		1	2	2	2	0	0	0	0	0	0	0	0	0	0	0	0	0	1	1	0	0	0	0	0	0	0	0	0	0	0	0	0	0	0	0	0	0	0	0	0	0	0
P39720	P39720	4	4	4	Oleate-activated transcription factor 1	OAF1		1	4	4	4	1	1	1	0	1	1	0	0	2	1	0	2	1	0	2	2	1	0	2	0	2	2	1	1	0	2	2	1	2	0	0	1	1	1	0	1	1	0
P39721	P39721	1	1	1	Protein AIM2	AIM2		1	1	1	1	0	1	0	0	0	0	1	0	0	1	0	1	0	0	0	0	1	0	1	0	1	0	0	1	0	1	1	1	1	0	0	0	1	0	0	0	0	1
P39727	P39727	12	12	12	ER-derived vesicles protein ERV46	ERV46		1	12	12	12	10	9	10	8	5	8	7	5	6	5	7	3	7	6	2	7	7	5	5	4	5	6	6	5	4	6	5	4	7	4	4	10	9	10	8	5	8	7
P39734	P39734	1	1	1	Protein HPH2	FRT2		1	1	1	1	0	0	0	0	0	0	0	0	0	0	0	0	0	0	1	0	0	0	0	0	0	0	0	1	1	0	0	0	0	0	1	0	0	0	0	0	0	0
P39744	P39744	2	2	2	Nucleolar complex protein 2	NOC2		1	2	2	2	0	0	0	0	0	0	0	0	0	0	0	0	1	1	1	0	0	0	0	0	0	0	1	0	1	0	0	0	0	0	0	0	0	0	0	0	0	0
P39875	P39875	2	2	2	Exodeoxyribonuclease 1	EXO1		1	2	2	2	0	0	0	0	0	0	0	0	0	0	0	0	0	0	0	0	0	0	0	0	0	0	0	0	0	0	0	0	2	0	0	0	0	0	0	0	0	0
P39929	P39929	1	1	1	Vacuolar-sorting protein SNF7	SNF7		1	1	1	1	0	0	0	0	0	0	0	0	0	0	0	0	0	0	0	0	0	0	1	0	0	0	0	0	0	0	0	0	0	0	0	0	0	0	0	0	0	0
P39931	P39931	10	10	10	Protein SSP120	SSP120		1	10	10	10	7	6	5	3	8	6	7	4	7	7	5	3	2	1	0	7	4	5	6	2	7	7	4	5	2	7	5	6	7	2	2	7	6	5	3	8	6	7
P39933	P39933	10	10	10	Transcription factor IIIA	PZF1		1	10	10	10	3	4	5	5	4	4	4	4	4	4	5	4	4	8	2	5	5	4	5	3	5	5	3	7	2	5	6	4	7	1	5	3	4	5	5	4	4	4
P39935	P39935	1	1	1	Eukaryotic initiation factor 4F subunit p150	TIF4631		1	1	1	1	0	0	1	1	0	0	0	0	0	0	0	0	1	0	1	1	0	1	0	0	1	0	0	1	1	1	1	1	1	0	0	0	0	1	1	0	0	0
P39938;P39939	P39938;P39939	4;3	4;3	4;3	40S ribosomal protein S26-A;40S ribosomal protein S26-B	RPS26A;RPS26B	;	2	4	4	4	0	0	1	3	0	1	1	2	0	1	1	2	1	1	1	0	1	1	3	1	0	0	0	1	1	0	0	0	1	0	1	0	0	1	3	0	1	1
P39954	P39954	11	11	11	Adenosylhomocysteinase	SAH1		1	11	11	11	2	3	2	3	4	6	9	5	5	6	5	1	3	4	2	5	6	5	4	3	5	5	5	4	2	3	5	5	6	0	4	2	3	2	3	4	6	9
P39956	P39956	2	2	2	DNA damage-responsive transcriptional repressor RPH1	RPH1		1	2	2	2	1	1	1	1	1	1	1	1	1	1	1	1	1	2	1	1	1	1	1	1	1	1	1	1	1	1	1	1	1	1	1	1	1	1	1	1	1	1
P39958	P39958	1	1	1	Rab GDP-dissociation inhibitor	GDI1		1	1	1	1	0	0	0	0	0	1	1	0	0	0	1	0	0	0	0	0	0	0	0	0	0	0	0	0	0	0	0	0	0	0	0	0	0	0	0	0	1	1
P39960	P39960	11	11	11	GTPase-activating protein BEM2/IPL2	BEM2		1	11	11	11	1	0	1	1	0	1	0	0	0	0	0	1	3	5	1	0	0	0	1	0	0	0	1	3	0	0	1	0	3	0	0	1	0	1	1	0	1	0
P39967	P39967	4	4	4	Ubiquitin carboxyl-terminal hydrolase 9	UBP9		1	4	4	4	1	2	2	3	0	0	0	1	0	0	0	2	1	0	0	1	1	0	1	0	0	1	1	2	0	1	1	0	1	0	0	1	2	2	3	0	0	0
P39968	P39968	2	2	2	Vacuolar protein 8	VAC8		1	2	2	2	0	0	0	1	0	0	0	0	0	0	0	0	1	0	0	0	0	0	0	0	0	0	0	0	0	0	0	0	1	0	0	0	0	0	1	0	0	0
P39976	P39976	10	10	10	D-lactate dehydrogenase [cytochrome] 3	DLD3		1	10	10	10	6	5	5	4	9	6	8	5	1	3	6	1	3	2	0	2	1	0	4	1	0	2	1	3	0	1	1	0	2	0	0	6	5	5	4	9	6	8
P39997	P39997	1	1	1	Ectonucleotide pyrophosphatase/phosphodiesterase 2;Alkaline phosphodiesterase 1;Nucleotide pyrophosphatase	NPP2		1	1	1	1	0	0	0	0	0	0	0	0	0	0	0	0	0	0	0	0	0	0	0	0	0	0	0	0	0	1	0	0	0	0	0	0	0	0	0	0	0	0
P40002	P40002	3	3	3	Transcriptional regulator MIT1	MIT1		1	3	3	3	1	1	2	1	1	1	1	0	0	1	3	1	0	0	1	0	0	1	1	0	0	2	0	0	0	0	0	0	0	0	0	1	1	2	1	1	1	1
P40017	P40017	15	15	15	Carnitine O-acetyltransferase YAT2	YAT2		1	15	15	15	3	3	7	5	3	4	7	6	4	5	3	3	6	2	1	6	6	3	7	5	4	5	7	8	2	4	7	5	9	0	4	3	3	7	5	3	4	7
P40020	P40020	3	3	3	Factor interacting with REF2	FIR1		1	3	3	3	0	0	0	0	0	0	0	1	1	0	0	0	1	2	1	1	0	0	1	0	0	0	1	0	0	0	1	0	1	0	0	0	0	0	0	0	0	0
P40021	P40021	1	1	1	Zinc-regulated protein 8	ZRG8		1	1	1	1	0	0	0	0	0	0	0	0	0	0	0	0	0	1	0	0	0	0	0	0	0	0	0	0	0	0	0	0	0	0	0	0	0	0	0	0	0	0
P40024	P40024	3	3	3	ABC transporter ATP-binding protein ARB1	ARB1		1	3	3	3	0	0	0	0	0	1	1	0	0	2	0	0	0	1	0	0	1	1	0	0	1	1	0	0	0	0	0	1	0	0	0	0	0	0	0	0	1	1
P40029	P40029	1	1	1	Peptide methionine sulfoxide reductase	MXR1		1	1	1	1	0	0	0	0	1	0	0	1	1	0	1	0	1	1	0	0	0	0	1	1	1	0	0	0	1	0	0	0	0	0	1	0	0	0	0	1	0	0
P40036	P40036	2	2	2	GLC7-interacting protein 2	GIP2		1	2	2	2	0	0	0	1	0	0	0	0	0	0	0	1	0	0	1	1	0	0	1	0	0	0	0	1	0	0	1	1	1	0	0	0	0	0	1	0	0	0
P40040	P40040	1	1	1	Protein THO1	THO1		1	1	1	1	0	0	0	0	0	0	0	0	0	0	0	0	0	1	0	0	0	0	1	0	0	0	0	0	0	0	0	0	0	0	0	0	0	0	0	0	0	0
P40043	P40043	27	27	27	Respiratory growth induced protein 1	RGI1		1	27	27	27	23	20	24	25	21	19	24	20	21	20	22	18	10	6	13	17	20	21	20	11	15	20	19	19	10	17	18	20	21	8	10	23	20	24	25	21	19	24
148273;148274;148275;148276;148277;148278;148279;148280;148281;148282;148283;148284;148285;148286;148287;148288;148289;148290;148291;148292;148293;148294;148295;148296;148297;148298;148299;148300;148301;148302;148303;148304;148305;148306;148307;148308;148309;148310;148311;148312;148313;148314;148315;148316;148317;148318;148319;148320;148321;148322;148323;148324;148325;148326;148327;148328;148329;…
;360371;360372;360373;360374;360375;360376;360377;360378;360379;360380;360381;360382;360383;360384;360385;360386;360387;360388;360389;360390;360391;360392;360393;360394;360395;360396;360397;360398;360399;360400;360401;360402;360403;360404;360405;360406;360407;360408;360409;360410;360411;360412;360413;360414;360415;360416;360417;360418;360419;360420;360421;360422;360423;360424;360425;360426;360427…	30608;33769;35784;57045;67598;146552;147729;159055;161137;161179;161424;175436;207509;207575;245420;290459;294517;313635;316091;317297;317550;360227;360341;378742;394820;394893;394904	1443;1444	268		10;68	148
P40052	P40052	1	1	1	Uncharacterized protein YER079W	YER079W		1	1	1	1	0	0	0	1	0	0	0	1	0	0	0	1	0	1	1	0	0	0	1	0	0	0	0	1	0	0	0	0	1	0	0	0	0	0	1	0	0	0
P40055	P40055	4	4	4	U3 small nucleolar RNA-associated protein 7	UTP7		1	4	4	4	2	2	2	1	2	1	2	1	1	2	1	2	2	1	2	1	1	1	1	1	1	1	1	1	1	2	1	1	2	0	1	2	2	2	1	2	1	2
P40059	P40059	3	3	3	Transcriptional regulatory protein DOT6	DOT6		1	3	3	3	1	1	3	2	2	2	2	1	3	1	2	2	0	2	0	0	0	1	2	0	1	1	1	3	1	1	2	3	3	0	3	1	1	3	2	2	2	2
P40060	P40060	2	2	2	Ino eighty subunit 5	IES5		1	2	2	2	0	0	0	0	0	0	0	0	0	0	1	0	0	1	0	1	1	0	0	0	0	0	0	0	0	0	1	0	0	0	0	0	0	0	0	0	0	0
P40065	P40065	3	3	3	Monopolin complex subunit MAM1	MAM1		1	3	3	3	1	0	0	0	1	1	0	0	1	1	1	0	0	1	1	1	1	1	3	0	1	1	1	2	0	3	3	3	3	1	1	1	0	0	0	1	1	0
P40069	P40069	2	2	2	Importin subunit beta-4	KAP123		1	2	2	2	0	0	0	0	0	0	0	0	0	0	0	0	0	1	1	0	1	1	0	0	1	1	1	0	1	1	1	1	0	0	0	0	0	0	0	0	0	0
P40075	P40075	2	2	2	Vesicle-associated membrane protein-associated protein SCS2	SCS2		1	2	2	2	2	2	2	2	2	2	2	2	2	2	2	2	1	1	2	2	2	2	2	1	2	2	2	2	1	2	2	2	2	1	1	2	2	2	2	2	2	2
P40078	P40078	2	2	2	Ribosome biogenesis protein NSA2	NSA2		1	2	2	2	0	0	0	0	0	0	1	0	1	0	0	0	0	1	0	0	0	1	0	0	1	1	0	0	0	0	0	0	0	0	0	0	0	0	0	0	0	1
P40079	P40079	1	1	1	U3 small nucleolar ribonucleoprotein protein LCP5	LCP5		1	1	1	1	0	0	0	0	1	1	1	0	1	0	0	0	0	0	0	0	0	0	0	0	1	0	0	0	0	0	1	0	0	0	0	0	0	0	0	1	1	1
P40096	P40096	1	1	1	Negative cofactor 2 complex subunit alpha	BUR6		1	1	1	1	1	0	1	0	1	0	0	0	1	1	1	0	0	0	0	1	0	1	0	0	1	1	1	0	0	1	0	1	0	0	0	1	0	1	0	1	0	0
P40099	P40099	3	3	3	5-formyltetrahydrofolate cyclo-ligase	FAU1		1	3	3	3	2	3	3	2	1	1	2	2	1	2	1	2	1	0	0	0	1	0	2	0	0	0	0	2	0	0	1	0	2	1	0	2	3	3	2	1	1	2
P40151	P40151	2	2	2	DNA-dependent ATPase MGS1	MGS1		1	2	2	2	0	0	0	0	0	0	0	1	0	0	0	1	2	1	1	0	0	0	2	0	1	0	1	0	0	1	0	0	0	0	0	0	0	0	0	0	0	0
P40154	P40154	1	1	1	Ino eighty subunit 2	IES2		1	1	1	1	0	0	0	0	0	0	0	0	0	0	0	0	0	1	0	0	0	0	0	0	0	0	0	0	0	0	0	0	0	0	0	0	0	0	0	0	0	0
P40165	P40165	1	1	1	NAD(P)H-hydrate epimerase			1	1	1	1	0	0	0	0	0	0	0	0	0	0	0	0	0	1	0	0	0	0	0	0	0	0	0	0	0	0	0	0	0	0	0	0	0	0	0	0	0	0
P40185	P40185	4	4	4	Protein MMF1, mitochondrial	MMF1		1	4	4	4	0	0	0	0	1	2	2	0	1	2	2	0	0	2	1	1	1	1	0	1	2	1	0	0	1	0	0	1	0	0	1	0	0	0	0	1	2	2
P40187	P40187	7	7	7	GSY2-interacting protein PIG2	PIG2		1	7	7	7	5	6	6	7	4	4	4	5	4	4	5	3	2	1	0	0	1	1	4	0	0	2	0	3	0	0	0	0	2	0	1	5	6	6	7	4	4	4
P40188	P40188	26	26	26	Respiratory growth induced protein 2	RGI2		1	26	26	26	21	15	21	16	15	16	17	12	13	12	17	13	7	7	10	10	15	12	15	6	9	8	13	13	6	9	8	9	12	2	5	21	15	21	16	15	16	17
P40208	P40208	1	1	1	Glucose-induced degradation protein 8	GID8		1	1	1	1	0	0	0	0	0	0	0	0	0	0	0	0	1	0	0	0	0	0	0	0	0	0	0	1	0	0	0	0	0	0	0	0	0	0	0	0	0	0
P40212;Q12690	P40212;Q12690	4;2	4;2	4;2	60S ribosomal protein L13-B;60S ribosomal protein L13-A	RPL13B;RPL13A	;	2	4	4	4	0	0	0	3	1	0	0	1	0	0	0	2	1	2	4	1	0	0	2	0	1	0	1	0	1	1	0	0	1	0	0	0	0	0	3	1	0	0
P40217	P40217	1	1	1	Eukaryotic translation initiation factor 3 subunit I	TIF34		1	1	1	1	0	0	0	0	0	0	0	0	0	0	0	0	0	1	0	1	0	0	0	0	0	0	0	0	0	0	0	0	0	0	0	0	0	0	0	0	0	0
P40218	P40218	1	1	1	Uncharacterized protein YMR147W			1	1	1	1	0	0	0	0	0	0	0	1	1	0	0	0	0	0	1	0	0	0	1	0	1	0	0	0	0	1	1	1	0	0	0	0	0	0	0	0	0	0
P40302	P40302	4	4	4	Proteasome subunit alpha type-6	PRE5		1	4	4	4	0	1	1	0	0	0	1	0	1	0	0	0	0	2	0	1	0	0	2	0	1	1	2	2	0	1	2	1	1	0	0	0	1	1	0	0	0	1
P40303	P40303	1	1	1	Proteasome subunit alpha type-4	PRE6		1	1	1	1	0	0	0	0	0	0	0	0	0	0	1	0	0	1	0	0	0	0	0	0	0	0	0	0	0	0	0	0	0	0	0	0	0	0	0	0	0	0
P40339	P40339	1	1	1	Replication factor C subunit 4	RFC4		1	1	1	1	0	0	0	0	0	0	0	1	0	0	0	0	0	1	0	0	0	0	1	0	0	0	0	0	0	0	0	0	0	0	0	0	0	0	0	0	0	0
P40340	P40340	2	2	2	Tat-binding homolog 7	YTA7		1	2	2	2	0	0	0	0	0	0	0	0	0	0	0	0	0	1	1	0	0	0	0	0	0	0	0	0	0	0	0	0	0	0	0	0	0	0	0	0	0	0
P40343	P40343	1	1	1	Vacuolar protein sorting-associated protein 27	VPS27		1	1	1	1	0	0	0	0	0	0	0	0	0	0	0	0	0	0	0	0	0	0	0	0	0	0	0	0	0	1	1	0	1	0	0	0	0	0	0	0	0	0
P40345	P40345	3	3	3	Phospholipid:diacylglycerol acyltransferase	LRO1		1	3	3	3	1	1	1	1	0	0	0	0	0	0	0	0	1	2	0	1	0	0	0	0	0	1	0	2	0	1	0	0	0	0	1	1	1	1	1	0	0	0
P40347	P40347	1	1	1	Low molecular weight phosphotyrosine protein phosphatase	LTP1		1	1	1	1	0	0	0	0	0	0	0	0	0	0	0	0	0	0	0	0	0	0	0	0	0	0	0	0	1	0	0	0	0	0	0	0	0	0	0	0	0	0
P40353	P40353	1	1	1	Alcohol O-acetyltransferase 1	ATF1		1	1	1	1	0	0	0	0	0	0	0	0	0	0	0	0	0	0	0	0	0	0	1	0	1	0	0	1	0	0	1	1	1	0	1	0	0	0	0	0	0	0
P40360	P40360	2	2	2	Amino-acid acetyltransferase, mitochondrial	ARG2		1	2	2	2	1	1	0	0	0	1	1	0	1	1	0	0	0	0	0	0	0	0	0	0	0	0	0	0	0	0	0	0	0	0	0	1	1	0	0	0	1	1
P40363	P40363	5	5	5	S-formylglutathione hydrolase			1	5	5	5	2	1	2	2	3	2	3	3	2	2	2	3	3	2	2	2	2	2	3	4	3	2	3	4	4	2	3	2	3	2	4	2	1	2	2	3	2	3
P40364	P40364	2	2	2	Mitochondrial peculiar membrane protein 1	MPM1		1	2	2	2	0	0	0	1	0	0	0	1	0	0	0	1	0	0	1	0	0	0	1	0	0	0	0	1	1	0	0	0	0	0	0	0	0	0	1	0	0	0
P40395	P40395	3	3	3	Guanine nucleotide exchange factor subunit RIC1	RIC1		1	3	3	3	0	0	0	1	0	0	0	1	0	0	0	0	0	2	0	0	0	0	1	0	0	0	0	1	0	0	0	0	1	0	0	0	0	0	1	0	0	0
P40414	P40414	9	9	9	Tropomyosin-2	TPM2		1	9	9	9	0	1	0	0	0	0	0	1	1	2	3	2	3	1	6	8	7	6	9	6	6	7	8	7	4	8	8	7	5	2	4	0	1	0	0	0	0	0
P40453	P40453	1	1	1	Ubiquitin carboxyl-terminal hydrolase 7	UBP7		1	1	1	1	0	0	0	0	0	0	0	0	0	0	0	0	0	1	0	0	0	0	0	0	0	0	0	0	0	0	0	0	0	0	0	0	0	0	0	0	0	0
P40454	P40454	7	7	7	Serine/threonine-protein phosphatase 2A activator 1	RRD1		1	7	7	7	5	5	5	5	4	4	4	3	4	5	6	3	3	2	1	3	4	3	4	1	2	4	3	4	0	5	4	4	4	0	1	5	5	5	5	4	4	4
P40457	P40457	3	3	3	Protein MLP2	MLP2		1	3	3	3	0	0	0	1	0	0	0	0	0	0	0	0	1	2	0	1	1	0	0	0	0	0	0	1	0	0	0	0	1	0	0	0	0	0	1	0	0	0
P40462	P40462	1	1	1	Protein TMA108	TMA108		1	1	1	1	1	1	0	0	1	1	0	0	0	0	0	0	0	0	0	1	0	0	0	0	0	0	0	0	0	1	1	0	0	0	1	1	1	0	0	1	1	0
P40466	P40466	1	1	1	Fork head protein homolog 1	FKH1		1	1	1	1	1	0	1	0	0	0	0	1	0	0	0	0	0	0	1	0	0	0	0	0	0	0	0	0	0	0	0	0	0	0	0	1	0	1	0	0	0	0
P40467	P40467	1	1	1	Activator of stress genes 1	ASG1		1	1	1	1	1	1	0	0	1	0	1	0	1	0	0	0	0	0	1	1	1	1	1	0	1	1	0	1	0	1	1	1	1	0	0	1	1	0	0	1	0	1
P40473	P40473	5	5	5	Transcriptional activator POG1	POG1		1	5	5	5	3	2	2	2	2	2	1	2	2	2	2	2	1	1	1	2	2	1	3	0	1	2	2	2	0	2	1	2	2	0	1	3	2	2	2	2	2	1
P40477	P40477	1	1	1	Nucleoporin NUP159	NUP159		1	1	1	1	0	0	0	0	0	0	0	0	0	0	0	0	0	1	0	0	0	0	0	0	0	0	0	0	0	0	0	0	0	0	0	0	0	0	0	0	0	0
P40489	P40489	1	1	1	Transcriptional repressor XBP1	XBP1		1	1	1	1	1	0	0	0	0	0	0	0	0	0	0	0	0	0	1	0	0	0	0	0	0	0	0	0	0	0	0	0	0	0	0	1	0	0	0	0	0	0
P40492	P40492	3	3	3	Protein FYV10	FYV10		1	3	3	3	1	1	1	2	2	1	2	1	1	1	2	2	1	1	0	1	1	1	2	1	1	1	2	2	1	1	1	1	1	0	1	1	1	1	2	2	1	2
P40495	P40495	1	1	1	Homoisocitrate dehydrogenase, mitochondrial	LYS12		1	1	1	1	0	0	0	1	1	1	1	1	1	1	1	0	0	0	0	0	0	0	0	0	0	1	0	0	0	0	0	0	0	0	0	0	0	0	1	1	1	1
P40506	P40506	4	4	4	Phosphopantothenate--cysteine ligase CAB2	CAB2		1	4	4	4	0	1	1	1	1	2	3	1	0	2	0	0	0	0	1	1	2	0	1	0	1	2	0	1	1	1	2	0	1	0	1	0	1	1	1	1	2	3
P40509	P40509	1	1	1	Coatomer subunit epsilon	SEC28		1	1	1	1	0	0	0	0	0	1	1	0	0	1	0	0	0	0	0	0	0	0	0	0	1	0	0	0	1	0	0	0	0	0	0	0	0	0	0	0	1	1
P40511	P40511	4	4	4	Sporulation-specific protein 22	SPO22		1	4	4	4	0	0	0	0	0	0	0	0	0	0	0	0	0	1	0	3	1	1	0	0	1	2	1	2	0	3	1	1	1	0	0	0	0	0	0	0	0	0
P40522	P40522	1	1	1	Transcription factor VHR1	VHR1		1	1	1	1	1	1	1	1	1	1	1	1	1	1	1	1	1	1	1	1	1	0	1	0	1	0	0	1	0	1	1	1	0	1	0	1	1	1	1	1	1	1
P40525	P40525	7	7	3	60S ribosomal protein L34-B	RPL34B		1	7	7	3	2	2	2	2	2	2	5	3	3	3	6	3	3	3	4	2	3	4	2	1	4	3	2	2	5	2	4	2	4	1	1	2	2	2	2	2	2	5
P40531	P40531	1	1	1	Protein GVP36	GVP36		1	1	1	1	0	0	0	0	0	0	0	0	0	0	0	0	0	0	1	0	0	0	0	0	0	0	0	0	0	0	0	0	0	0	0	0	0	0	0	0	0	0
P40535	P40535	3	3	3	ATF/CREB activator 2	CST6		1	3	3	3	2	1	0	0	0	0	0	0	0	1	0	0	0	2	0	0	0	0	0	0	1	0	0	1	0	0	0	0	0	0	0	2	1	0	0	0	0	0
P40541	P40541	5	5	5	Cohesin subunit SCC3	IRR1		1	5	5	5	0	0	0	0	0	0	0	1	1	2	0	2	2	1	1	3	1	0	3	1	0	0	1	2	0	3	2	1	1	0	1	0	0	0	0	0	0	0
P40553	P40553	4	4	4	Peroxiredoxin DOT5	DOT5		1	4	4	4	1	1	2	1	0	2	2	2	2	1	2	1	0	2	2	2	2	1	1	0	2	2	1	2	0	2	2	2	1	0	1	1	1	2	1	0	2	2
P40561	P40561	1	1	1	RNA-binding protein SGN1	SGN1		1	1	1	1	0	0	1	0	0	0	0	1	1	0	0	0	0	0	1	0	1	0	1	0	0	0	0	0	0	0	1	0	0	0	0	0	0	1	0	0	0	0
P40573	P40573	4	4	4	Transcriptional activator of sulfur metabolism MET28	MET28		1	4	4	4	4	2	4	3	4	1	4	2	4	4	3	2	1	1	3	3	2	3	2	1	2	4	3	2	1	3	1	2	2	1	1	4	2	4	3	4	1	4
P40581;P38143	P40581	3;1	3;1	3;1	Peroxiredoxin HYR1	HYR1		2	3	3	3	0	0	0	0	1	1	1	2	1	1	1	0	0	1	2	0	0	1	0	1	1	1	1	0	1	0	1	1	0	0	1	0	0	0	0	1	1	1
P40693	P40693	2	2	2	Ribosome biogenesis protein RLP7	RLP7		1	2	2	2	1	0	1	1	1	1	1	1	1	1	1	1	0	1	1	1	0	1	1	0	1	1	1	1	0	1	1	1	1	0	0	1	0	1	1	1	1	1
P40892	P40892	1	1	1	Putative acetyltransferase YJL218W			1	1	1	1	1	1	1	1	1	0	1	1	1	1	1	1	0	0	1	1	1	0	0	0	0	1	1	0	0	1	1	1	0	0	0	1	1	1	1	1	0	1
P40917	P40917	1	1	1	AP-1-like transcription factor YAP4	CIN5		1	1	1	1	1	0	0	0	0	0	0	0	0	0	0	0	0	0	0	0	0	0	0	0	0	0	0	0	0	0	0	0	0	0	0	1	0	0	0	0	0	0
P40962	P40962	3	3	3	Zinc finger protein RTS2	RTS2		1	3	3	3	0	0	0	0	1	1	0	1	1	0	0	1	1	1	2	1	0	1	1	1	1	1	0	2	1	1	1	1	2	0	1	0	0	0	0	1	1	0
P40965	P40965	7	7	7	MutS protein homolog 4	MSH4		1	7	7	7	0	0	0	0	0	0	0	0	0	0	0	1	0	0	0	6	1	0	2	1	0	2	2	2	0	5	2	1	2	0	0	0	0	0	0	0	0	0
P40968	P40968	2	2	2	Pre-mRNA-processing factor 17	CDC40		1	2	2	2	0	0	1	0	0	0	0	2	0	1	0	1	0	0	0	1	1	0	2	0	0	1	1	2	0	1	1	0	1	0	0	0	0	1	0	0	0	0
P41056	P41056	7	1	1	60S ribosomal protein L33-B	RPL33B		1	7	1	1	2	4	5	5	4	3	3	3	3	2	4	5	0	2	3	1	2	3	4	1	1	3	0	4	2	2	2	1	3	0	0	0	0	1	1	0	1	0
P41057	P41057	5	5	5	40S ribosomal protein S29-A	RPS29A		1	5	5	5	1	2	3	3	3	3	2	4	1	0	2	3	2	2	1	2	2	0	4	2	0	0	2	4	0	3	1	0	3	1	0	1	2	3	3	3	3	2
P41058	P41058	5	5	5	40S ribosomal protein S29-B	RPS29B		1	5	5	5	2	3	3	2	1	4	1	5	1	3	2	4	3	0	1	4	4	1	5	3	1	0	1	5	0	3	3	2	5	2	0	2	3	3	2	1	4	1
P41277	P41277	3	3	3	Glycerol-1-phosphate phosphohydrolase 1	GPP1		1	3	3	3	0	0	0	1	1	1	2	1	0	1	0	1	0	1	0	0	0	0	1	0	0	0	0	0	0	0	0	0	1	0	0	0	0	0	1	1	1	2
P41318	P41318	1	1	1	Target of rapamycin complex subunit LST8	LST8		1	1	1	1	1	0	0	1	0	1	1	1	0	0	0	1	1	1	0	0	0	0	1	1	0	0	0	1	0	0	1	0	1	0	0	1	0	0	1	0	1	1
P41338	P41338	6	6	6	Acetyl-CoA acetyltransferase	ERG10		1	6	6	6	0	0	0	1	0	1	1	1	2	2	2	1	0	2	2	1	0	2	2	0	2	2	1	2	0	1	1	2	1	0	0	0	0	0	1	0	1	1
P41696	P41696	4	4	4	Asparagine-rich zinc finger protein AZF1	AZF1		1	4	4	4	2	1	2	1	1	1	1	1	1	1	1	1	1	0	3	1	1	1	1	1	1	1	1	1	0	2	1	2	0	0	1	2	1	2	1	1	1	1
P41697	P41697	1	1	1	Bud site selection protein 6	BUD6		1	1	1	1	0	0	0	0	0	0	0	0	1	0	0	0	0	0	0	1	0	0	1	0	0	0	1	1	0	1	1	1	1	0	0	0	0	0	0	0	0	0
P41735	P41735	10	10	10	5-demethoxyubiquinone hydroxylase, mitochondrial	CAT5		1	10	10	10	9	7	6	4	7	6	6	3	5	5	4	4	4	2	0	3	4	5	4	2	3	4	4	3	1	3	5	2	4	1	2	9	7	6	4	7	6	6
P41805	P41805	12	12	12	60S ribosomal protein L10	RPL10		1	12	12	12	3	2	0	4	3	3	2	5	3	4	2	3	4	6	4	5	4	2	5	1	4	5	2	4	4	6	3	3	3	0	2	3	2	0	4	3	3	2
P41807	P41807	1	1	1	V-type proton ATPase subunit H	VMA13		1	1	1	1	1	1	1	1	0	0	0	0	1	0	0	1	1	1	0	1	0	0	1	1	1	0	0	1	1	0	0	0	0	0	1	1	1	1	1	0	0	0
P41810	P41810	1	1	1	Coatomer subunit beta	SEC26		1	1	1	1	0	0	0	1	0	0	0	0	0	0	0	0	0	0	0	0	0	0	0	0	0	1	0	1	0	0	1	0	1	0	0	0	0	0	1	0	0	0
P41818	P41818	3	3	3	Protein GLC8	GLC8		1	3	3	3	2	2	2	1	1	1	1	1	1	1	2	1	1	1	3	1	1	1	2	1	1	1	2	0	1	2	1	1	2	0	1	2	2	2	1	1	1	1
P41833	P41833	7	7	7	N6-adenosine-methyltransferase IME4	IME4		1	7	7	7	0	0	0	0	0	1	0	3	0	5	1	1	1	2	0	1	1	1	1	0	0	3	1	6	2	0	3	2	4	0	3	0	0	0	0	0	1	0
P41895	P41895	6	6	6	Transcription initiation factor IIF subunit alpha	TFG1		1	6	6	6	3	4	3	3	3	3	3	3	3	2	3	1	3	3	5	3	3	3	3	2	3	3	2	2	3	3	3	2	3	0	2	3	4	3	3	3	3	3
P41903	P41903	31	31	31	Peroxisomal acyl-coenzyme A thioester hydrolase 1	TES1		1	31	31	31	15	17	23	21	14	15	23	18	13	15	18	16	13	16	11	11	14	17	21	12	15	13	13	19	11	14	14	14	21	12	13	15	17	23	21	14	15	23
P41911	P41911	28	28	27	Glycerol-3-phosphate dehydrogenase [NAD(+)] 2, mitochondrial	GPD2		1	28	28	27	21	23	25	23	19	20	25	21	18	15	16	19	13	9	7	16	16	9	22	11	10	11	16	20	7	16	14	11	23	10	7	21	23	25	23	19	20	25
558;383559;383560;383561;383562;383563;383564;383565;383566;383567;383568;383569;383570;383571;383572;383573;383574;383575;383576;383577;383578;383579;383580;383581;383582;383583;383584;383585;383586;383587;383588;383589;383590;383591;383592;383593;383594;383595;383596;383597;383598;383599;383600;383601;383602;383603;383604;383605;383606;383607;383608;383609;383610;383611;383612;383613;383614;383…	27950;47428;49436;60272;60316;71195;76949;89309;98472;98525;151157;194715;194729;196204;201562;214845;242824;242845;248187;272365;343329;358291;359668;362748;363752;379935;383700;396731		285;286;287			119;307;331
P41920	P41920	7	7	7	Ran-specific GTPase-activating protein 1	YRB1		1	7	7	7	2	1	2	1	2	0	2	4	2	2	1	3	2	1	2	1	1	2	7	0	2	2	2	4	0	1	4	3	4	0	0	2	1	2	1	2	0	2
P41921	P41921	4	4	4	Glutathione reductase	GLR1		1	4	4	4	0	0	0	0	1	1	1	2	1	1	0	0	0	1	0	0	1	1	1	1	0	2	0	1	1	1	1	0	1	0	2	0	0	0	0	1	1	1
P41939	P41939	7	7	7	Isocitrate dehydrogenase [NADP] cytoplasmic	IDP2		1	7	7	7	0	0	0	0	0	1	2	1	2	2	2	0	2	4	0	0	1	2	1	0	2	2	0	0	4	0	0	2	0	0	3	0	0	0	0	0	1	2
P41940	P41940	1	1	1	Mannose-1-phosphate guanyltransferase	PSA1		1	1	1	1	1	1	1	0	1	0	0	0	1	1	0	0	0	0	1	0	0	0	1	0	0	0	0	0	0	0	0	0	0	0	0	1	1	1	0	1	0	0
P42073	P42073	3	3	3	RNA end formation protein 2	REF2		1	3	3	3	0	0	0	0	0	0	0	0	0	0	0	0	0	3	0	0	0	0	0	0	0	0	0	0	0	0	0	0	0	0	0	0	0	0	0	0	0	0
P42839	P42839	4	4	4	Low affinity vacuolar monovalent cation/H(+) antiporter	VNX1		1	4	4	4	0	0	0	1	0	0	1	1	0	0	0	1	1	0	2	1	1	0	1	0	1	0	1	1	1	1	2	0	2	0	1	0	0	0	1	0	0	1
P42844	P42844	8	8	8	Mitochondrial protein import protein ZIM17	ZIM17		1	8	8	8	4	5	8	4	5	5	7	4	5	5	6	1	4	1	2	4	5	5	3	4	4	5	5	4	4	4	5	4	4	5	2	4	5	8	4	5	5	7
P42846	P42846	8	8	8	Protein KRI1	KRI1		1	8	8	8	2	1	1	1	1	1	1	1	2	0	0	2	1	3	3	2	0	0	1	1	1	2	1	1	1	2	1	2	1	0	1	2	1	1	1	1	1	1
P42938	P42938	1	1	1	Probable ATP-dependent kinase TDA10	TDA10		1	1	1	1	0	0	0	0	0	0	0	0	0	0	0	0	0	1	0	0	0	0	0	0	0	0	0	0	0	0	0	0	0	0	0	0	0	0	0	0	0	0
P42944	P42944	2	2	2	Protein GZF3	GZF3		1	2	2	2	2	1	1	1	1	1	1	1	1	1	0	1	0	0	1	1	1	1	1	0	1	1	1	1	0	1	1	1	0	0	0	2	1	1	1	1	1	1
P42949	P42949	1	1	1	Mitochondrial import inner membrane translocase subunit TIM16	PAM16		1	1	1	1	0	0	0	0	0	0	0	0	0	0	0	0	0	1	0	0	0	0	0	0	0	0	0	0	1	0	0	0	0	0	0	0	0	0	0	0	0	0
P43122	P43122	1	1	1	tRNA N6-adenosine threonylcarbamoyltransferase, mitochondrial	QRI7		1	1	1	1	1	1	0	0	0	0	0	0	1	0	1	0	0	0	0	0	0	0	0	0	0	0	0	0	0	0	0	0	0	0	0	1	1	0	0	0	0	0
P43124	P43124	4	4	4	Non-structural maintenance of chromosome element 4	NSE4		1	4	4	4	0	0	1	1	2	1	3	2	2	2	0	1	2	2	3	3	3	0	2	1	2	3	3	2	1	3	3	3	0	0	1	0	0	1	1	2	1	3
P43553	P43553	1	1	1	Magnesium transporter ALR2	ALR2		1	1	1	1	0	0	0	0	0	0	0	1	1	1	0	0	0	0	0	0	0	0	0	0	1	0	0	0	0	0	0	1	1	0	0	0	0	0	0	0	0	0
P43554	P43554	2	2	2	SWI/SNF global transcription activator complex subunit SWP82	SWP82		1	2	2	2	1	1	1	1	1	1	1	0	1	1	1	0	1	2	1	1	1	1	1	1	1	0	0	0	0	1	1	1	0	0	0	1	1	1	1	1	1	1
P43561	P43561	11	11	11	Iron transport multicopper oxidase FET5	FET5		1	11	11	11	8	8	8	8	3	3	6	3	5	5	4	5	4	1	0	7	4	1	6	3	4	6	4	7	3	6	7	6	10	4	5	8	8	8	8	3	3	6
P43563	P43563	2	2	2	CBK1 kinase activator protein MOB2	MOB2		1	2	2	2	1	1	1	1	0	1	1	0	0	0	0	0	0	1	0	0	0	0	0	0	0	0	0	0	0	0	0	0	0	0	0	1	1	1	1	0	1	1
P43567	P43567	8	8	8	Alanine--glyoxylate aminotransferase 1	AGX1		1	8	8	8	1	1	3	2	3	5	6	1	2	6	4	0	2	2	1	3	5	4	2	2	3	3	2	1	3	2	3	2	3	1	3	1	1	3	2	3	5	6
P43574	P43574	1	1	1	Transcriptional regulatory protein GAT1	GAT1		1	1	1	1	0	0	0	0	0	0	0	0	0	0	0	0	0	1	0	0	0	0	0	0	0	0	0	0	0	0	0	0	0	0	0	0	0	0	0	0	0	0
P43579	P43579	1	1	1	Ino eighty subunit 1	IES1		1	1	1	1	0	0	0	0	0	0	0	1	0	0	0	0	0	0	1	0	0	1	0	0	0	0	0	0	0	0	0	0	0	0	1	0	0	0	0	0	0	0
P43588	P43588	3	3	3	Ubiquitin carboxyl-terminal hydrolase RPN11	RPN11		1	3	3	3	1	0	1	1	1	1	1	1	1	1	2	0	1	0	0	1	1	1	1	1	1	1	1	1	1	0	1	1	1	0	1	1	0	1	1	1	1	1
P43589	P43589	6	6	6	Pre-mRNA-splicing factor SAD1	SAD1		1	6	6	6	3	3	2	4	1	1	1	2	1	2	0	1	1	0	0	1	1	0	3	2	2	0	0	4	1	1	0	0	6	0	2	3	3	2	4	1	1	1
P43590	P43590	5	5	5	Uncharacterized peptidase YFR006W	YFR006W		1	5	5	5	0	0	0	2	1	1	0	3	1	0	0	3	2	1	0	1	0	0	4	0	0	0	0	4	0	0	0	0	3	1	2	0	0	0	2	1	1	0
P43593	P43593	2	2	2	Ubiquitin carboxyl-terminal hydrolase 6	UBP6		1	2	2	2	0	1	1	1	1	1	1	1	0	0	1	1	0	1	1	1	1	1	1	0	1	1	0	1	1	0	1	0	1	0	1	0	1	1	1	1	1	1
P43596	P43596	2	2	2	ISWI one complex protein 3	IOC3		1	2	2	2	0	0	0	0	0	0	0	0	0	0	0	0	0	2	0	0	0	0	0	0	0	0	0	0	0	0	0	0	0	0	0	0	0	0	0	0	0	0
P43597	P43597	4	4	4	Uncharacterized protein YFR016C	YFR016C		1	4	4	4	0	1	1	1	1	0	1	1	2	1	1	1	0	1	1	2	1	1	1	0	2	1	1	3	0	2	1	2	3	0	1	0	1	1	1	1	0	1
P43609	P43609	7	7	7	Chromatin structure-remodeling complex protein RSC8	RSC8		1	7	7	7	4	5	4	6	4	4	3	5	3	4	2	5	1	1	6	4	4	3	6	1	4	3	2	5	1	4	3	2	5	1	1	4	5	4	6	4	4	3
P43616	P43616	2	2	2	Cys-Gly metallodipeptidase DUG1	DUG1		1	2	2	2	0	0	0	0	0	0	0	0	0	0	0	1	1	1	1	0	0	0	1	0	0	0	0	0	0	0	0	0	0	0	0	0	0	0	0	0	0	0
P43634	P43634	2	2	2	Activatory protein CHA4	CHA4		1	2	2	2	1	0	2	0	1	1	0	0	1	0	0	0	0	0	1	1	0	0	0	0	0	1	0	0	0	1	0	0	0	0	0	1	0	2	0	1	1	0
P43638	P43638	6	6	6	MAP-homologous protein 1	MHP1		1	6	6	6	2	2	5	4	1	2	2	3	3	2	1	1	2	3	3	2	3	2	2	2	2	3	2	2	1	1	3	3	2	0	1	2	2	5	4	1	2	2
P45976	P45976	1	1	1	Pre-mRNA polyadenylation factor FIP1	FIP1		1	1	1	1	0	0	1	0	1	0	0	0	1	0	1	0	0	0	0	0	1	0	1	0	0	0	1	0	0	1	0	0	0	0	0	0	0	1	0	1	0	0
P45978	P45978	1	1	1	Protein SCD6	SCD6		1	1	1	1	0	0	0	1	0	0	0	1	0	0	0	0	0	0	0	0	0	0	1	0	0	0	0	1	0	0	0	0	1	0	0	0	0	0	1	0	0	0
P46367	P46367	10	10	10	Potassium-activated aldehyde dehydrogenase, mitochondrial	ALD4		1	10	10	10	0	1	1	2	2	2	3	1	3	3	3	1	0	7	4	0	1	0	0	1	1	3	0	1	1	1	2	2	0	0	0	0	1	1	2	2	2	3
P46655	P46655	3	3	3	Glutamate--tRNA ligase, cytoplasmic	GUS1		1	3	3	3	0	1	0	1	1	0	1	1	1	1	2	0	1	0	0	0	2	2	1	1	1	1	0	1	1	0	0	3	2	0	1	0	1	0	1	1	0	1
P46669	P46669	5	5	5	DNA-directed RNA polymerase I subunit RPA43	RPA43		1	5	5	5	1	1	1	3	0	0	0	0	0	0	0	1	1	2	1	0	0	0	2	0	0	0	0	0	1	0	0	0	0	0	0	1	1	1	3	0	0	0
P46672	P46672	1	1	1	tRNA-aminoacylation cofactor ARC1	ARC1		1	1	1	1	0	0	0	0	1	1	1	0	1	0	1	0	0	0	0	1	1	0	0	0	1	1	0	0	0	0	0	0	0	0	0	0	0	0	0	1	1	1
P46675	P46675	3	3	3	Protein STU2	STU2		1	3	3	3	0	0	1	1	1	1	1	0	0	1	0	0	1	2	2	2	1	0	0	0	0	0	0	0	0	0	1	0	1	0	0	0	0	1	1	1	1	1
P46676	P46676	7	7	7	Suppressor of mar1-1 protein	SUM1		1	7	7	7	6	3	5	3	3	3	2	2	2	2	2	2	2	3	6	3	2	3	2	0	3	2	3	2	1	3	2	2	1	0	1	6	3	5	3	3	3	2
P46677	P46677	3	3	3	Transcription initiation factor TFIID subunit 1	TAF1		1	3	3	3	2	0	1	2	0	1	0	0	1	0	2	2	0	1	0	2	1	1	1	0	0	0	1	1	0	2	1	1	1	0	1	2	0	1	2	0	1	0
P46678	P46678	11	11	11	Transcription factor TFIIIB component B	BDP1		1	11	11	11	6	5	9	8	7	8	7	4	5	5	6	4	6	7	7	5	1	2	6	2	5	2	6	2	2	7	5	8	1	1	3	6	5	9	8	7	8	7
P46680	P46680	1	1	1	Actin-interacting protein 1	AIP1		1	1	1	1	0	0	0	0	0	0	0	0	0	0	0	0	0	1	0	0	0	0	0	0	0	0	0	0	0	0	0	0	0	0	0	0	0	0	0	0	0	0
P46784	P46784	10	10	2	40S ribosomal protein S10-B	RPS10B		1	10	10	2	6	5	5	6	5	5	5	7	5	4	5	7	2	7	7	5	5	5	7	2	5	5	5	5	3	4	4	3	6	2	2	6	5	5	6	5	5	5
P46946	P46946	1	1	1	DNA endonuclease SAE2	SAE2		1	1	1	1	1	0	1	0	0	1	0	1	0	0	0	0	0	0	0	0	0	0	0	0	0	0	0	0	0	0	0	0	0	0	0	1	0	1	0	0	1	0
P46954	P46954	1	1	1	Protein SIP4	SIP4		1	1	1	1	0	0	0	0	1	1	1	0	0	1	0	0	0	0	0	0	1	1	1	0	0	0	0	0	0	0	0	0	0	0	0	0	0	0	0	1	1	1
P46959	P46959	1	1	1	tRNA (adenine(58)-N(1))-methyltransferase catalytic subunit TRM61	GCD14		1	1	1	1	0	0	0	0	0	0	0	0	0	0	0	0	0	0	0	0	0	0	0	0	0	0	0	0	0	0	0	0	1	0	0	0	0	0	0	0	0	0
P46969	P46969	1	1	1	Ribulose-phosphate 3-epimerase	RPE1		1	1	1	1	0	0	0	0	1	1	1	1	1	1	1	0	0	0	0	1	1	1	0	0	0	1	0	1	0	1	1	1	0	0	0	0	0	0	0	1	1	1
P47005	P47005	1	1	1	F-box protein DAS1	DAS1		1	1	1	1	0	0	0	0	0	0	0	0	0	0	0	0	0	0	0	0	0	0	1	0	0	0	0	1	0	0	0	0	1	0	0	0	0	0	0	0	0	0
P47006	P47006	7	7	7	DNA-directed RNA polymerase I subunit RPA34	RPA34		1	7	7	7	3	5	5	3	4	3	2	2	4	3	1	1	1	2	4	2	3	1	4	0	2	3	1	3	1	2	3	1	4	0	0	3	5	5	3	4	3	2
P47008	P47008	1	1	1	Phosphatidylinositol transfer protein SFH5	SFH5		1	1	1	1	0	0	0	0	0	0	0	0	0	0	1	0	0	0	0	0	0	0	0	0	0	0	0	0	0	0	0	0	0	0	0	0	0	0	0	0	0	0
P47027	P47027	2	2	2	DNA replication regulator DPB11	DPB11		1	2	2	2	1	1	0	0	1	2	1	0	1	2	1	1	1	0	2	2	2	2	1	1	2	2	1	1	0	2	2	1	1	0	1	1	1	0	0	1	2	1
P47029	P47029	7	7	7	Arrestin-related trafficking adapter 3	ALY2		1	7	7	7	1	3	4	4	2	4	2	3	3	2	2	0	1	1	0	2	2	1	2	1	3	2	3	3	1	3	1	3	2	0	1	1	3	4	4	2	4	2
P47030;P36115	P47030	3;1	3;1	3;1	Protein TAX4	TAX4		2	3	3	3	2	2	2	3	2	2	2	2	2	2	2	1	2	2	0	2	2	2	1	2	2	1	2	2	2	2	2	2	2	2	2	2	2	2	3	2	2	2
P47035	P47035	21	21	21	Nucleolar protein NET1	NET1		1	21	21	21	3	2	4	7	3	4	3	3	4	3	2	4	5	10	12	5	3	2	4	2	3	3	3	2	1	5	1	6	2	0	2	3	2	4	7	3	4	3
P47037	P47037	19	19	19	Structural maintenance of chromosomes protein 3	SMC3		1	19	19	19	0	0	0	1	5	5	3	3	7	6	4	9	6	8	13	15	7	8	7	5	4	11	12	6	3	12	11	9	9	2	5	0	0	0	1	5	5	3
P47079	P47079	1	1	1	T-complex protein 1 subunit theta	CCT8		1	1	1	1	0	0	0	0	0	0	0	0	0	0	0	0	0	0	0	0	0	1	0	0	0	1	0	0	0	0	0	1	0	0	0	0	0	0	0	0	0	0
P47085	P47085	3	3	3	MEMO1 family protein YJR008W			1	3	3	3	1	1	1	1	1	1	2	2	1	1	1	1	2	2	0	1	1	1	2	1	1	1	1	1	1	1	1	1	3	0	1	1	1	1	1	1	1	2
P47089	P47089	2	2	2	Translation machinery-associated protein 22	TMA22		1	2	2	2	0	1	0	0	0	1	0	0	0	0	0	0	0	1	1	1	1	0	0	0	0	0	1	0	0	1	1	0	0	0	0	0	1	0	0	0	1	0
P47093	P47093	1	1	1	U6 snRNA-associated Sm-like protein LSm8	LSM8		1	1	1	1	0	0	0	0	0	0	0	0	0	0	0	0	0	1	0	0	0	0	0	0	0	0	0	0	0	0	0	0	0	0	0	0	0	0	0	0	0	0
P47104	P47104	1	1	1	Regulator of V-ATPase in vacuolar membrane protein 1	RAV1		1	1	1	1	0	0	0	0	0	0	0	0	0	0	0	0	0	0	0	1	0	0	0	0	0	0	0	0	0	0	0	0	1	0	0	0	0	0	0	0	0	0
P47110	P47110	1	1	1	DNA polymerase delta subunit 3	POL32		1	1	1	1	0	0	0	0	0	1	0	0	0	0	1	0	0	0	0	0	0	0	0	0	0	0	0	0	0	0	0	0	0	0	0	0	0	0	0	0	1	0
P47116	P47116	1	1	1	Serine/threonine-protein kinase PTK2/STK2	PTK2		1	1	1	1	1	1	0	0	1	0	0	0	1	0	0	0	1	1	0	1	0	0	1	0	0	0	0	0	0	0	0	0	1	0	0	1	1	0	0	1	0	0
P47124	P47124	1	1	1	Putative glycosyltransferase HOC1	HOC1		1	1	1	1	0	0	0	0	0	1	0	0	0	0	0	0	1	1	0	0	0	0	0	0	0	0	0	0	0	0	0	0	0	0	0	0	0	0	0	0	1	0
P47128	P47128	8	8	8	Chromatin modification-related protein EAF6	EAF6		1	8	8	8	3	3	3	5	3	3	4	4	3	3	4	4	2	4	5	2	3	4	4	3	4	3	3	4	3	2	3	3	5	1	3	3	3	3	5	3	3	4
P47134	P47134	10	10	10	Protein BIR1	BIR1		1	10	10	10	7	3	8	7	4	4	4	3	3	1	2	1	3	4	4	1	1	0	3	1	2	1	1	1	1	1	2	1	2	0	0	7	3	8	7	4	4	4
P47136	P47136	2	2	2	Bud site selection protein 4	BUD4		1	2	2	2	0	0	0	1	0	0	0	1	0	0	0	0	0	0	1	0	0	0	1	0	0	0	0	0	0	0	0	0	0	0	0	0	0	0	1	0	0	0
P47143	P47143	3	3	3	Adenosine kinase	ADO1		1	3	3	3	0	0	1	1	1	1	2	1	1	1	1	0	0	2	1	0	1	1	1	0	1	1	0	1	1	1	1	1	1	0	1	0	0	1	1	1	1	2
P47165	P47165	2	2	2	Xanthine phosphoribosyltransferase 1	XPT1		1	2	2	2	0	0	0	0	1	1	1	1	1	1	1	0	0	1	0	1	1	1	0	0	1	1	1	0	0	0	1	1	0	0	0	0	0	0	0	1	1	1
P47176	P47176	1	1	1	Branched-chain-amino-acid aminotransferase, cytosolic	BAT2		1	1	1	1	0	0	0	0	1	1	0	0	1	0	0	0	0	0	0	0	0	0	0	0	0	1	1	0	0	0	0	0	0	0	0	0	0	0	0	1	1	0
P48015	P48015	2	2	2	Aminomethyltransferase, mitochondrial	GCV1		1	2	2	2	0	0	0	0	2	2	2	1	2	2	2	0	0	1	0	1	1	2	0	1	2	2	2	1	2	2	1	2	1	0	2	0	0	0	0	2	2	2
P48164	P48164	17	5	5	40S ribosomal protein S7-B	RPS7B		1	17	5	5	8	6	7	7	6	6	7	5	10	7	6	4	6	11	10	6	6	6	9	6	7	6	7	6	7	9	7	4	6	1	2	3	2	2	1	2	2	2
P48231	P48231	2	2	2	Tricalbin-2	TCB2		1	2	2	2	0	0	0	0	0	0	0	0	0	0	0	0	0	2	0	0	0	0	0	0	0	0	0	0	0	0	0	0	0	0	0	0	0	0	0	0	0	0
P48237	P48237	2	2	2	Mitochondrial group I intron splicing factor CCM1	CCM1		1	2	2	2	0	1	1	0	0	0	1	1	1	1	1	0	0	0	0	1	2	2	0	0	1	2	0	1	1	1	2	1	0	0	0	0	1	1	0	0	0	1
P48412	P48412	1	1	1	Nonsense-mediated mRNA decay protein 3	UPF3		1	1	1	1	0	0	1	1	0	0	0	0	0	0	0	0	0	0	1	0	0	0	0	1	0	0	0	0	1	0	1	1	1	0	1	0	0	1	1	0	0	0
P48524	P48524	2	2	2	Ubiquitin ligase-binding protein BUL1	BUL1		1	2	2	2	0	0	0	2	0	0	0	0	0	0	0	1	0	0	0	0	0	0	0	0	0	0	0	1	0	0	0	0	1	0	0	0	0	0	2	0	0	0
P48526	P48526	4	4	4	Isoleucine--tRNA ligase, mitochondrial	ISM1		1	4	4	4	2	4	2	1	2	2	1	1	1	1	0	1	2	0	0	2	0	0	1	0	0	1	0	1	0	0	0	0	1	0	0	2	4	2	1	2	2	1
P48570;Q12122	P48570;Q12122	3;3	3;3	3;3	Homocitrate synthase, cytosolic isozyme;Homocitrate synthase, mitochondrial	LYS20;LYS21	;	2	3	3	3	0	0	1	0	0	0	2	0	0	2	2	0	0	1	0	0	0	0	1	0	1	1	0	0	0	0	0	1	1	0	0	0	0	1	0	0	0	2
P48581	P48581	2	2	2	DNA damage checkpoint control protein RAD17	RAD17		1	2	2	2	0	0	0	0	0	0	0	0	1	1	0	0	1	1	0	1	1	1	1	1	0	1	1	1	0	1	1	1	1	0	1	0	0	0	0	0	0	0
P48589	P48589	9	9	9	40S ribosomal protein S12	RPS12		1	9	9	9	2	0	0	3	2	0	1	5	2	0	1	4	3	1	4	1	1	0	4	2	2	2	1	5	4	1	2	1	5	1	0	2	0	0	3	2	0	1
P48836	P48836	1	1	1	V-type proton ATPase subunit G	VMA10		1	1	1	1	1	1	0	0	1	0	0	0	0	1	0	1	1	0	1	0	0	1	1	0	1	0	1	1	1	1	0	1	0	0	0	1	1	0	0	1	0	0
P49017	P49017	2	2	2	2-methoxy-6-polyprenyl-1,4-benzoquinol methylase, mitochondrial	COQ5		1	2	2	2	0	0	0	0	0	0	0	0	0	1	0	0	0	0	0	1	1	1	0	1	1	1	1	1	1	1	1	1	1	0	1	0	0	0	0	0	0	0
P49089	P49089	30	15	16	Asparagine synthetase [glutamine-hydrolyzing] 1	ASN1		1	30	15	16	22	20	26	19	11	8	10	10	8	5	2	9	4	7	2	8	6	2	11	0	5	6	4	13	0	7	4	3	13	4	0	10	9	15	7	2	1	3
P49090	P49090	38	38	24	Asparagine synthetase [glutamine-hydrolyzing] 2	ASN2		1	38	38	24	29	26	28	31	16	14	14	15	13	9	7	16	12	6	3	17	11	4	18	4	10	10	8	21	2	13	9	5	22	6	4	29	26	28	31	16	14	14
P49095	P49095	21	21	21	Glycine dehydrogenase (decarboxylating), mitochondrial	GCV2		1	21	21	21	6	12	11	10	9	7	6	8	8	6	4	7	5	4	6	9	10	6	8	2	6	8	7	13	1	10	10	8	12	7	4	6	12	11	10	9	7	6
P49166	P49166	9	9	4	60S ribosomal protein L37-A	RPL37A		1	9	9	4	5	5	5	5	4	5	4	6	5	4	3	6	5	3	3	5	6	3	6	3	5	4	5	5	4	4	5	5	5	5	3	5	5	5	5	4	5	4
P49167	P49167	10	10	10	60S ribosomal protein L38	RPL38		1	10	10	10	4	4	4	5	5	4	3	6	5	3	3	5	1	5	3	5	4	3	8	1	4	2	4	6	1	3	4	2	3	0	1	4	4	4	5	5	4	3
P49334	P49334	2	2	2	Mitochondrial import receptor subunit TOM22	TOM22		1	2	2	2	0	0	0	1	0	0	0	1	0	0	0	1	0	1	0	0	0	0	1	0	0	0	0	0	2	0	0	0	0	0	0	0	0	0	1	0	0	0
P49723	P49723	2	2	2	Ribonucleoside-diphosphate reductase small chain 2	RNR4		1	2	2	2	0	0	0	0	0	0	0	2	0	0	0	0	1	0	1	0	0	0	2	0	0	0	0	2	0	0	0	0	0	1	0	0	0	0	0	0	0	0
P50089	P50089	22	22	22	Uncharacterized protein YGR237C			1	22	22	22	6	7	6	10	6	6	6	9	5	5	6	9	4	12	5	6	6	5	10	5	6	7	5	10	4	5	6	8	8	6	5	6	7	6	10	6	6	6
P50102	P50102	7	7	7	Ubiquitin carboxyl-terminal hydrolase 8	UBP8		1	7	7	7	5	3	3	2	2	2	2	3	2	2	2	3	1	1	0	3	2	1	3	1	2	2	2	4	0	2	2	2	2	0	1	5	3	3	2	2	2	2
P50105	P50105	1	1	1	Transcription initiation factor TFIID subunit 4	TAF4		1	1	1	1	0	0	1	0	1	0	0	1	0	1	1	1	0	1	1	1	0	0	1	1	0	1	1	1	1	1	0	1	1	0	1	0	0	1	0	1	0	0
P50106	P50106	1	1	1	DNA-directed RNA polymerase I subunit RPA14	RPA14		1	1	1	1	1	1	1	1	1	1	1	0	1	1	1	0	0	1	1	1	1	0	1	0	1	1	1	0	1	1	1	1	0	0	0	1	1	1	1	1	1	1
P50107	P50107	7	7	7	Lactoylglutathione lyase	GLO1		1	7	7	7	4	3	3	1	5	4	5	2	4	4	3	2	4	2	0	4	4	3	3	4	3	4	4	2	2	3	4	3	3	2	2	4	3	3	1	5	4	5
P50109	P50109	10	10	10	Protein PSP2	PSP2		1	10	10	10	1	1	3	4	1	2	5	2	2	3	4	2	2	7	6	3	3	3	1	1	3	4	3	3	3	3	4	3	4	2	1	1	1	3	4	1	2	5
P50111	P50111	5	5	5	Protein ZDS1	ZDS1		1	5	5	5	1	1	1	2	1	1	1	1	2	0	1	2	2	3	2	2	2	1	1	2	2	1	2	2	2	2	2	2	2	0	2	1	1	1	2	1	1	1
P50263	P50263	4	4	4	Protein SIP18	SIP18		1	4	4	4	3	1	3	2	2	2	2	1	2	3	0	2	1	3	3	1	0	1	3	1	0	1	1	0	0	1	1	0	1	0	1	3	1	3	2	2	2	2
P50623	P50623	22	22	22	SUMO-conjugating enzyme UBC9	UBC9		1	22	22	22	16	14	13	18	10	10	10	17	12	10	8	16	13	15	12	11	11	8	19	8	10	13	11	18	4	14	13	9	17	8	9	16	14	13	18	10	10	10
2324;372325;372326;372327;372328;372329;372330;372331;372332;372333;372334;372335;372336;372337;372338;372339;372340;372341;372342;372343;372344;372345;372346;372347;372348;372349;372350;372351;372352;372353;372354;372355;372356;372357;372358;372359;372360;372361;372362;372363;372364;372365;372366;372367;372368;372369;372370;372371;372372;372373;372374;372375;372376;372377;372378;372379;372380;37…	2443;33588;33615;46450;47216;63436;63469;170972;170992;170994;185505;185567;246976;246984;246985;304281;365380;365406;369217;370727;385786;385795	1687;1688;1689;1690;1691;1692;1693;1694;1695;1696;1697;1698;1699;1700;1701	334		14;15;27;30;31;40;48;71;74;76;141;146;147;153;157	36
P50947	P50947	4	4	4	Transcriptional regulatory protein PHO23	PHO23		1	4	4	4	4	3	4	4	2	3	2	3	2	2	2	2	0	0	1	2	2	1	4	0	1	1	1	2	0	2	1	1	3	0	0	4	3	4	4	2	3	2
P51401	P51401	16	1	1	60S ribosomal protein L9-B	RPL9B		1	16	1	1	7	6	6	5	8	8	7	7	11	7	5	5	3	8	7	6	6	7	9	3	8	5	6	9	3	5	9	7	6	1	2	0	0	0	0	0	0	0
P51402	P51402	7	2	2	60S ribosomal protein L37-B	RPL37B		1	7	2	2	3	5	3	5	4	5	4	6	3	4	3	6	4	3	1	4	5	3	6	3	3	2	4	5	3	2	4	3	5	5	3	1	2	1	2	2	2	2
P51862	P51862	13	13	13	RHO1 GDP-GTP exchange protein 2	ROM2		1	13	13	13	1	1	2	2	0	1	0	2	1	1	0	2	2	10	3	1	1	1	1	1	1	1	0	2	1	0	0	0	2	0	1	1	1	2	2	0	1	0
P51979	P51979	10	10	10	ATP-dependent DNA helicase MER3	HFM1		1	10	10	10	0	0	0	0	0	0	1	0	1	0	1	0	1	0	1	10	6	1	3	3	6	9	8	4	0	9	7	8	3	0	2	0	0	0	0	0	0	1
P52488	P52488	37	37	37	Ubiquitin-activating enzyme E1-like	UBA2		1	37	37	37	10	7	11	16	6	4	4	13	10	3	4	8	5	28	22	9	5	5	18	4	10	9	8	16	3	12	9	9	15	7	5	10	7	11	16	6	4	4
P52868	P52868	1	1	1	Pre-mRNA-splicing factor CWC23	CWC23		1	1	1	1	0	0	0	0	1	0	0	0	0	0	0	0	0	0	0	0	0	0	0	0	0	0	0	0	0	0	0	0	1	0	0	0	0	0	0	1	0	0
P52893	P52893	1	1	1	Probable alanine aminotransferase, mitochondrial	ALT1		1	1	1	1	0	0	1	0	0	0	0	0	0	0	0	0	0	0	0	0	0	0	0	0	0	0	0	0	0	0	0	0	0	0	0	0	0	1	0	0	0	0
P52910	P52910	13	13	13	Acetyl-coenzyme A synthetase 2	ACS2		1	13	13	13	10	9	10	7	4	6	8	6	4	4	4	4	6	1	3	3	4	3	3	2	4	4	2	4	2	3	3	2	4	0	1	10	9	10	7	4	6	8
P53044	P53044	3	3	3	Ubiquitin fusion degradation protein 1	UFD1		1	3	3	3	0	0	0	0	0	1	0	1	1	1	0	1	1	0	2	3	0	2	2	1	2	3	2	2	1	3	2	1	2	0	1	0	0	0	0	0	1	0
P53045	P53045	4	4	4	Methylsterol monooxygenase	ERG25		1	4	4	4	1	1	2	3	0	0	0	0	0	0	1	0	0	1	0	0	0	0	0	1	0	0	0	0	1	0	0	0	0	0	0	1	1	2	3	0	0	0
P53050	P53050	1	1	1	Protein MGA1	MGA1		1	1	1	1	0	0	0	1	0	0	0	1	0	0	0	0	1	0	0	0	0	0	1	0	0	0	0	0	0	0	0	0	0	0	0	0	0	0	1	0	0	0
P53061	P53061	4	4	4	Protein ZIP2	ZIP2		1	4	4	4	0	0	0	0	0	0	0	0	1	0	0	0	0	0	1	4	0	0	0	2	0	0	1	3	0	3	3	0	1	0	0	0	0	0	0	0	0	0
P53064	P53064	3	3	3	RNA polymerase-associated protein RTF1	RTF1		1	3	3	3	2	2	2	2	2	1	1	2	1	2	1	1	1	2	3	1	2	1	2	2	2	2	2	3	1	1	2	1	1	2	1	2	2	2	2	2	1	1
P53072	P53072	1	1	1	tRNA acetyltransferase TAN1	TAN1		1	1	1	1	1	0	0	1	1	0	1	1	1	0	0	1	0	1	1	1	1	0	1	1	0	0	1	1	0	1	1	1	1	0	0	1	0	0	1	1	0	1
P53075	P53075	1	1	1	Outer spore wall assembly protein SHE10	SHE10		1	1	1	1	0	0	0	0	0	0	0	0	0	0	0	0	0	1	0	0	0	0	0	0	0	0	0	0	0	0	0	0	0	0	0	0	0	0	0	0	0	0
P53081	P53081	2	2	2	NGG1-interacting factor 3	NIF3		1	2	2	2	0	0	0	0	1	1	1	0	1	1	1	0	0	1	0	1	1	0	0	0	1	1	1	0	1	0	1	1	0	0	1	0	0	0	0	1	1	1
P53090	P53090	1	1	1	Aromatic/aminoadipate aminotransferase 1	ARO8		1	1	1	1	0	0	0	0	0	0	0	0	1	0	1	0	0	1	0	0	0	1	0	0	0	0	0	0	1	0	0	0	1	0	0	0	0	0	0	0	0	0
P53096	P53096	1	1	1	Probable histone deacetylase HOS2	HOS2		1	1	1	1	1	1	1	0	0	1	1	0	1	1	1	0	0	0	0	0	0	1	0	0	1	0	0	0	0	0	1	1	0	0	0	1	1	1	0	0	1	1
P53100	P53100	1	1	1	Putative 2-hydroxyacid dehydrogenase YGL185C			1	1	1	1	0	0	0	0	0	0	0	0	0	0	0	0	0	0	0	0	0	0	0	0	0	0	0	1	0	0	0	0	0	0	0	0	0	0	0	0	0	0
P53102	P53102	3	3	3	Meiotic nuclear division protein 1	MND1		1	3	3	3	0	0	0	0	0	0	0	0	0	0	0	0	0	2	0	0	0	0	0	0	0	0	0	0	0	1	0	1	0	0	0	0	0	0	0	0	0	0
P53115	P53115	3	3	3	Putative DNA helicase INO80	INO80		1	3	3	3	0	0	0	0	0	0	0	0	0	0	0	0	1	2	2	0	0	0	1	1	0	0	0	0	0	0	1	0	0	0	0	0	0	0	0	0	0	0
P53133	P53133	1	1	1	Uncharacterized protein YGL117W	YGL117W		1	1	1	1	0	0	0	0	0	0	0	0	0	0	0	0	0	0	0	0	0	0	1	0	0	0	0	0	0	0	0	0	0	0	0	0	0	0	0	0	0	0
P53157	P53157	1	1	1	Mitochondrial pyruvate carrier 1	MPC1		1	1	1	1	0	0	0	0	0	0	0	0	0	0	0	0	0	0	0	0	0	0	0	0	0	0	0	0	1	0	0	0	0	0	0	0	0	0	0	0	0	0
P53172	P53172	2	2	2	Protein SDS23	SDS23		1	2	2	2	1	2	1	0	1	1	2	0	2	1	2	0	0	1	0	1	1	1	0	1	1	2	1	0	0	1	1	2	0	0	0	1	2	1	0	1	1	2
P53184	P53184	16	16	16	Nicotinamidase	PNC1		1	16	16	16	11	9	11	9	12	11	13	12	10	7	9	8	5	5	2	8	10	9	11	6	12	6	10	11	4	9	7	6	13	5	5	11	9	11	9	12	11	13
P53187	P53187	1	1	1	Homologous-pairing protein 2	HOP2		1	1	1	1	0	0	0	0	0	0	0	1	0	0	0	0	0	0	1	0	1	0	1	1	0	0	1	1	0	0	0	0	1	0	1	0	0	0	0	0	0	0
P53199	P53199	2	2	2	Sterol-4-alpha-carboxylate 3-dehydrogenase, decarboxylating	ERG26		1	2	2	2	0	0	0	0	0	0	1	0	0	0	0	0	0	1	0	0	0	1	0	0	0	0	0	0	0	0	1	0	0	0	0	0	0	0	0	0	0	1
P53201	P53201	2	2	2	SWR1-complex protein 4	SWC4		1	2	2	2	0	0	0	0	0	0	0	0	0	0	0	0	0	2	0	0	0	0	0	0	0	0	0	1	0	0	0	0	0	0	0	0	0	0	0	0	0	0
P53207	P53207	2	2	2	U1 small nuclear ribonucleoprotein component SNU71	SNU71		1	2	2	2	0	0	0	0	0	0	0	0	1	0	0	1	0	1	2	0	0	0	2	0	0	0	0	0	0	0	0	1	2	0	0	0	0	0	0	0	0	0
P53219	P53219	1	1	1	Abhydrolase domain-containing protein IMO32	IMO32		1	1	1	1	0	0	0	0	0	0	1	0	0	0	0	0	0	0	0	0	0	0	0	0	0	0	0	0	0	0	0	0	0	0	0	0	0	0	0	0	0	1
P53221;P05743	P53221;P05743	11;9	11;9	11;9	60S ribosomal protein L26-B;60S ribosomal protein L26-A	RPL26B;RPL26A	;	2	11	11	11	4	1	1	2	4	1	1	7	3	1	1	2	0	3	9	1	1	2	8	1	1	1	3	5	1	1	2	2	3	1	1	4	1	1	2	4	1	1
P53227	P53227	1	1	1	Uncharacterized protein YGR042W	YGR042W		1	1	1	1	1	0	1	1	0	0	0	0	0	0	0	0	0	1	1	0	0	0	0	0	0	0	0	0	0	0	0	0	0	1	0	1	0	1	1	0	0	0
P53228	P53228	1	1	1	Transaldolase NQM1	NQM1		1	1	1	1	0	0	0	0	1	1	0	0	1	0	0	0	0	1	0	1	0	0	1	0	0	0	0	0	0	1	1	0	0	0	0	0	0	0	0	1	1	0
P53236	P53236	2	2	2	Chromatin structure-remodeling complex subunit RSC1	RSC1		1	2	2	2	0	1	1	1	0	0	0	2	1	0	0	1	1	1	2	1	2	0	2	0	0	1	0	1	0	1	0	0	1	0	0	0	1	1	1	0	0	0
P53252	P53252	4	4	4	Sphingolipid long chain base-responsive protein PIL1	PIL1		1	4	4	4	2	1	1	1	1	0	0	0	2	0	0	0	1	3	2	2	0	0	2	2	2	0	1	0	0	1	2	0	0	0	0	2	1	1	1	1	0	0
P53261	P53261	2	2	2	Pescadillo homolog	NOP7		1	2	2	2	2	2	1	1	0	1	0	0	0	0	0	0	0	1	0	0	0	0	1	0	0	0	0	0	0	0	0	0	0	0	0	2	2	1	1	0	1	0
P53264	P53264	4	4	4	Cardiolipin-specific deacylase 1, mitochondrial	CLD1		1	4	4	4	0	0	0	0	1	1	2	0	1	1	0	0	1	3	0	1	1	1	2	1	1	1	1	1	0	1	1	1	2	0	2	0	0	0	0	1	1	2
P53274	P53274	5	5	5	Uncharacterized protein YGR126W			1	5	5	5	0	0	0	2	0	0	0	2	0	0	1	2	3	0	1	0	0	0	1	0	0	0	0	2	1	0	0	0	1	0	0	0	0	0	2	0	0	0
P53276	P53276	2	2	2	U3 small nucleolar RNA-associated protein 8	UTP8		1	2	2	2	1	1	1	0	0	1	0	0	0	0	0	1	1	0	0	0	0	0	0	0	0	0	1	1	0	0	0	1	1	0	0	1	1	1	0	0	1	0
P53297	P53297	26	26	26	PAB1-binding protein 1	PBP1		1	26	26	26	16	19	21	23	13	12	18	18	12	13	16	13	7	12	15	9	14	15	15	5	8	13	10	13	7	8	7	12	11	3	6	16	19	21	23	13	12	18
P53303	P53303	1	1	1	Zinc finger protein ZPR1	ZPR1		1	1	1	1	1	1	1	1	0	0	0	1	0	0	0	1	0	0	1	1	0	0	1	0	1	1	1	1	0	1	1	0	1	0	0	1	1	1	1	0	0	0
P53311	P53311	1	1	1	Mitochondrial pyruvate carrier 3	MPC3		1	1	1	1	0	0	0	0	0	0	0	0	0	0	0	0	0	1	0	0	0	0	0	0	0	0	0	0	0	0	0	0	0	0	0	0	0	0	0	0	0	0
P53312	P53312	2	2	2	Succinyl-CoA ligase [ADP-forming] subunit beta, mitochondrial	LSC2		1	2	2	2	0	0	0	1	0	0	2	1	0	2	2	0	0	1	0	0	0	1	0	0	1	1	0	1	1	0	0	2	0	0	1	0	0	0	1	0	0	2
P53316	P53316	2	2	2	Uncharacterized RNA-binding protein YGR250C	YGR250C		1	2	2	2	0	0	0	0	0	0	1	0	0	1	0	0	0	0	0	0	0	0	0	0	2	1	0	0	0	0	1	1	0	0	0	0	0	0	0	0	0	1
P53320	P53320	2	2	2	Mitochondrial carrier protein MTM1	MTM1		1	2	2	2	0	0	0	0	1	1	0	1	1	1	1	1	0	0	0	1	0	0	1	0	1	1	0	0	0	1	0	0	0	0	0	0	0	0	0	1	1	0
P53326	P53326	21	21	21	Uncharacterized protein YGR266W	YGR266W		1	21	21	21	14	14	18	15	9	12	10	11	9	8	7	11	5	7	0	10	9	6	13	6	7	9	8	14	4	9	12	7	15	4	6	14	14	18	15	9	12	10
P53330	P53330	1	1	1	Regulator of Ty1 transposition protein 102	RTT102		1	1	1	1	0	0	0	0	1	0	0	0	0	0	0	0	1	0	1	0	0	1	1	0	0	0	0	0	0	0	0	0	0	0	0	0	0	0	0	1	0	0
P53332	P53332	7	7	7	Phosphopantetheine adenylyltransferase	CAB4		1	7	7	7	3	2	5	2	3	3	4	2	4	3	3	1	3	0	1	4	2	1	1	3	4	1	2	2	1	4	2	1	3	1	3	3	2	5	2	3	3	4
P53397	P53397	1	1	1	N-glycosylase/DNA lyase;8-oxoguanine DNA glycosylase;DNA-(apurinic or apyrimidinic site) lyase	OGG1		1	1	1	1	0	0	0	0	0	1	0	0	0	1	0	0	0	1	0	0	0	0	1	0	0	0	1	0	0	1	0	0	0	0	0	0	0	0	0	0	1	0
P53551	P53551	18	18	18	Histone H1	HHO1		1	18	18	18	2	3	3	3	4	4	3	4	6	4	3	4	6	7	9	7	6	4	11	5	6	5	7	9	2	7	8	5	6	0	3	2	3	3	3	4	4	3
P53598	P53598	2	2	2	Succinyl-CoA ligase [ADP-forming] subunit alpha, mitochondrial	LSC1		1	2	2	2	0	0	0	0	0	0	0	0	0	0	1	0	0	2	0	0	0	0	0	0	0	0	0	0	0	0	0	0	0	0	0	0	0	0	0	0	0	0
P53615	P53615	6	6	6	Carbonic anhydrase	NCE103		1	6	6	6	0	0	0	0	3	4	5	3	1	4	3	0	2	1	2	1	0	1	1	1	0	0	0	1	0	0	0	0	1	0	0	0	0	0	0	3	4	5
P53622	P53622	21	21	21	Coatomer subunit alpha	COP1		1	21	21	21	8	8	10	14	7	4	6	7	8	6	5	6	7	9	2	5	5	2	4	5	8	6	4	12	4	4	7	4	10	0	5	8	8	10	14	7	4	6
P53628	P53628	3	3	3	Transcription regulatory protein SNF12	SNF12		1	3	3	3	0	0	0	1	0	0	0	1	1	0	0	0	1	3	1	1	1	0	1	0	1	0	0	0	0	0	0	0	1	0	0	0	0	0	1	0	0	0
P53685	P53685	2	2	2	NAD-dependent protein deacetylase HST1	HST1		1	2	2	2	2	2	2	1	1	2	0	0	1	0	0	0	0	1	1	0	0	0	1	0	0	0	0	0	0	0	0	0	0	0	0	2	2	2	1	1	2	0
P53691	P53691	2	1	1	Peptidyl-prolyl cis-trans isomerase CPR6	CPR6		1	2	1	1	1	0	1	1	2	2	1	2	2	2	2	0	0	0	1	2	2	2	1	1	2	2	2	2	1	2	2	2	0	0	1	0	0	0	0	1	1	1
P53720	P53720	3	3	3	tRNA-dihydrouridine(20) synthase [NAD(P)+]	SMM1		1	3	3	3	0	0	0	0	0	1	0	1	1	0	0	0	1	2	0	0	0	0	1	0	1	0	0	1	0	0	0	0	1	0	0	0	0	0	0	0	1	0
P53731	P53731	5	5	5	Actin-related protein 2/3 complex subunit 2	ARC35		1	5	5	5	2	3	2	5	3	4	4	5	2	4	3	4	2	1	1	3	4	2	4	2	3	2	4	4	1	2	3	2	5	0	0	2	3	2	5	3	4	4
P53739;P25341	P53739	8;1	8;1	8;1	Flippase kinase 1	FPK1		2	8	8	8	4	3	6	5	2	2	0	2	1	0	0	0	0	0	0	1	2	0	1	0	0	0	2	0	0	1	0	0	3	0	0	4	3	6	5	2	2	0
P53830	P53830	1	1	1	Cold sensitive U2 snRNA suppressor 2	CUS2		1	1	1	1	0	0	0	0	0	0	0	1	0	0	0	0	0	0	1	0	0	0	1	0	0	0	0	1	0	0	0	0	0	0	0	0	0	0	0	0	0	0
P53849	P53849	4	4	4	Zinc finger protein GIS2	GIS2		1	4	4	4	3	3	3	3	3	2	2	4	3	1	1	3	1	1	2	3	2	3	4	1	3	2	3	4	0	2	2	3	3	1	1	3	3	3	3	3	2	2
P53852	P53852	1	1	1	Cysteine--tRNA ligase			1	1	1	1	0	0	0	1	0	0	0	0	0	0	0	0	0	0	0	0	0	0	0	0	0	0	0	0	0	0	0	0	1	0	0	0	0	0	1	0	0	0
P53853	P53853	2	2	2	Vacuolar protein sorting-associated protein 75	VPS75		1	2	2	2	0	0	0	0	0	0	0	0	0	0	0	0	0	1	1	0	0	0	1	0	0	0	0	0	0	0	0	0	0	0	0	0	0	0	0	0	0	0
P53860	P53860	3	3	3	Phosphatidylinositol transfer protein PDR16	PDR16		1	3	3	3	0	0	0	0	1	1	1	0	1	0	1	0	0	1	1	0	0	0	0	0	0	1	0	1	0	2	1	0	0	0	0	0	0	0	0	1	1	1
P53885	P53885	4	4	4	Signal transduction protein MDG1	MDG1		1	4	4	4	2	1	2	3	2	1	2	3	2	2	2	2	1	2	2	2	2	2	3	1	2	1	2	3	1	3	2	2	3	1	1	2	1	2	3	2	1	2
P53889	P53889	2	2	2	Uncharacterized mitochondrial hydrolase FMP41	FMP41		1	2	2	2	0	0	0	0	1	2	2	0	1	2	2	1	1	1	0	2	2	1	0	1	2	1	1	0	1	0	1	0	0	0	1	0	0	0	0	1	2	2
P53911	P53911	5	5	5	Chromatin modification-related protein EAF7	EAF7		1	5	5	5	3	2	3	2	2	3	1	2	3	2	3	1	1	4	2	2	2	4	3	2	3	2	3	2	1	2	3	3	2	0	3	3	2	3	2	2	3	1
P53912	P53912	2	2	2	Uncharacterized protein YNL134C			1	2	2	2	0	0	0	0	0	0	1	0	0	0	0	0	0	1	0	0	0	1	0	0	0	0	1	0	0	0	0	0	0	0	0	0	0	0	0	0	0	1
P53921	P53921	1	1	1	Putative mitochondrial ribosomal protein YNL122C			1	1	1	1	1	1	1	0	1	1	1	1	1	1	1	0	0	0	0	0	0	1	1	0	1	0	0	0	0	0	1	1	1	1	0	1	1	1	0	1	1	1
P53924	P53924	2	2	2	E3 ubiquitin-protein ligase DMA2	DMA2		1	2	2	2	1	1	1	1	1	1	1	1	1	1	1	1	1	0	0	1	1	1	1	1	1	1	1	1	1	1	1	1	1	2	1	1	1	1	1	1	1	1
P53925	P53925	3	3	3	Uncharacterized vacuolar membrane protein YNL115C			1	3	3	3	0	0	0	0	0	0	1	0	0	0	0	0	0	1	0	1	0	1	1	0	1	1	0	0	0	1	0	2	0	0	0	0	0	0	0	0	0	1
P53930	P53930	2	2	2	Protein AF-9 homolog	YAF9		1	2	2	2	1	1	1	1	1	1	1	1	1	1	1	1	1	0	1	1	1	1	1	0	1	1	1	1	0	1	0	1	0	0	0	1	1	1	1	1	1	1
P53935	P53935	4	4	4	Stress response protein NST1	NST1		1	4	4	4	1	1	0	2	1	2	2	2	1	2	1	1	1	3	3	2	2	1	1	1	2	1	2	3	1	1	2	2	3	0	2	1	1	0	2	1	2	2
P53941	P53941	2	2	2	U3 small nucleolar ribonucleoprotein protein IMP4	IMP4		1	2	2	2	0	0	0	1	0	0	0	0	0	0	0	0	0	0	0	0	0	0	0	0	0	0	0	0	0	0	0	0	1	0	0	0	0	0	1	0	0	0
P53946	P53946	3	3	3	Actin-related protein 5	ARP5		1	3	3	3	0	0	0	0	0	0	1	1	1	1	0	0	1	2	1	0	0	1	1	0	1	1	1	1	1	0	1	0	1	0	1	0	0	0	0	0	0	1
P53950	P53950	2	2	2	Vacuolar segregation protein 7	VAC7		1	2	2	2	0	1	0	0	0	1	0	0	0	0	0	0	0	0	0	0	0	0	0	0	0	0	0	0	0	1	1	1	0	0	0	0	1	0	0	0	1	0
P53958	P53958	2	2	2	Protein BOP3	BOP3		1	2	2	2	0	1	1	2	0	0	0	0	1	0	0	0	0	0	0	0	0	0	0	0	0	0	0	0	0	0	0	0	0	0	0	0	1	1	2	0	0	0
P53962	P53962	2	2	2	Uncharacterized WD repeat-containing protein YNL035C			1	2	2	2	0	0	1	0	0	0	1	1	0	0	0	0	0	0	0	1	1	0	1	0	0	0	1	1	0	0	1	0	1	0	0	0	0	1	0	0	0	1
P53968	P53968	8	8	8	Transcriptional regulator CRZ1	CRZ1		1	8	8	8	5	4	6	5	6	4	3	4	6	3	3	5	1	3	6	6	5	3	5	2	4	6	4	4	1	6	5	4	5	1	2	5	4	6	5	6	4	3
P53969	P53969	4	4	4	Sorting assembly machinery 50 kDa subunit	SAM50		1	4	4	4	1	0	0	2	0	0	0	2	0	0	0	0	2	1	0	0	0	0	2	0	0	0	0	3	1	0	0	0	3	0	0	1	0	0	2	0	0	0
P53973	P53973	1	1	1	Histone deacetylase HDA1	HDA1		1	1	1	1	1	1	1	1	1	1	1	1	1	1	1	1	1	1	1	1	1	1	1	1	1	1	1	1	1	1	1	1	1	1	1	1	1	1	1	1	1	1
P54000	P54000	2	2	2	RNA polymerase II transcriptional coactivator SUB1	SUB1		1	2	2	2	1	1	1	1	1	1	1	1	1	1	1	1	1	1	2	1	1	1	1	1	1	1	1	1	0	1	1	1	1	1	0	1	1	1	1	1	1	1
P54115	P54115	4	4	4	Magnesium-activated aldehyde dehydrogenase, cytosolic	ALD6		1	4	4	4	1	0	2	1	0	0	0	0	0	0	0	0	0	2	1	0	0	0	2	0	0	0	0	0	0	0	0	0	0	0	0	1	0	2	1	0	0	0
P54783	P54783	1	1	1	D-arabinono-1,4-lactone oxidase	ALO1		1	1	1	1	0	0	0	1	1	1	1	1	1	1	1	0	0	0	0	1	1	0	1	0	1	1	1	1	0	1	1	0	1	0	0	0	0	0	1	1	1	1
P54784	P54784	18	18	18	Origin recognition complex subunit 1	ORC1		1	18	18	18	0	1	2	1	5	6	3	3	6	4	2	3	5	4	8	12	6	1	2	2	3	5	9	4	1	13	11	11	4	1	2	0	1	2	1	5	6	3
P54785	P54785	7	7	7	Transcriptional activator/repressor MOT3	MOT3		1	7	7	7	5	5	5	5	5	5	5	5	5	5	5	4	4	4	5	4	5	5	5	3	5	5	4	4	3	4	5	5	5	2	3	5	5	5	5	5	5	5
P54790	P54790	1	1	1	Origin recognition complex subunit 3	ORC3		1	1	1	1	1	0	0	0	0	0	0	0	0	0	0	0	0	1	0	0	0	0	0	0	0	0	0	0	0	0	0	0	0	0	0	1	0	0	0	0	0	0
P54791	P54791	3	3	3	Origin recognition complex subunit 4	ORC4		1	3	3	3	1	1	1	1	1	1	1	2	1	1	1	0	0	1	2	1	1	1	1	0	0	1	0	0	0	1	0	1	0	0	0	1	1	1	1	1	1	1
P54838	P54838	1	1	1	Dihydroxyacetone kinase 1	DAK1		1	1	1	1	0	0	0	0	0	0	0	0	0	0	0	0	0	0	0	0	0	1	0	0	0	0	0	0	0	0	0	1	0	0	0	0	0	0	0	0	0	0
P54839	P54839	10	10	10	Hydroxymethylglutaryl-CoA synthase	ERG13		1	10	10	10	1	0	1	2	1	1	3	2	0	0	1	0	2	4	3	0	2	1	5	0	0	1	0	3	1	0	1	2	3	0	3	1	0	1	2	1	1	3
P54858	P54858	1	1	1	Protein DOS2	DOS2		1	1	1	1	0	0	0	0	0	0	0	0	0	0	0	0	0	1	0	0	0	0	0	0	0	0	0	0	0	0	0	0	0	0	0	0	0	0	0	0	0	0
P60010	P60010	14	14	14	Actin	ACT1		1	14	14	14	1	0	2	2	2	5	6	3	2	4	2	1	1	7	4	3	2	2	5	2	4	4	2	3	2	2	3	2	2	0	2	1	0	2	2	2	5	6
P61830	P61830	11	11	11	Histone H3	HHT1		1	11	11	11	8	8	9	6	8	7	8	8	8	9	9	7	3	0	5	8	9	7	9	6	8	8	9	8	5	9	8	9	7	3	6	8	8	9	6	8	7	8
P69771	P69771	1	1	1	Vacuolar protein-sorting-associated protein 46	DID2		1	1	1	1	1	1	1	1	1	1	1	1	1	0	0	1	1	1	1	1	1	0	1	1	1	1	1	1	1	1	1	1	1	0	1	1	1	1	1	1	1	1
P69850	P69850	1	1	1	DASH complex subunit DAD3	DAD3		1	1	1	1	0	0	0	0	0	0	0	0	0	1	0	0	0	0	0	0	0	0	0	0	0	0	0	0	0	0	0	0	0	0	0	0	0	0	0	0	0	0
P80210	P80210	2	2	2	Adenylosuccinate synthetase	ADE12		1	2	2	2	0	0	0	0	0	0	0	1	0	0	0	0	0	2	0	0	0	0	1	0	0	0	0	0	0	0	0	0	0	0	0	0	0	0	0	0	0	0
P80235	P80235	6	6	6	Putative mitochondrial carnitine O-acetyltransferase	YAT1		1	6	6	6	3	1	4	3	4	5	5	4	1	4	3	1	1	0	0	4	3	1	3	2	2	3	1	5	0	2	2	3	2	0	3	3	1	4	3	4	5	5
P81451	P81451	2	2	2	ATP synthase subunit K, mitochondrial	ATP19		1	2	2	2	0	0	0	1	0	0	0	1	0	0	0	0	0	0	1	1	0	0	1	0	0	1	1	0	1	1	0	0	0	0	0	0	0	0	1	0	0	0
P87262	P87262	6	2	2	60S ribosomal protein L34-A	RPL34A		1	6	2	2	2	2	2	2	2	2	4	2	3	3	4	2	3	2	4	2	3	4	2	1	4	2	2	1	5	2	4	2	3	1	1	1	1	1	1	1	1	1
P89102	P89102	1	1	1	Exocyst complex component SEC5	SEC5		1	1	1	1	1	1	0	1	1	1	1	1	1	1	1	1	1	0	0	1	1	1	1	1	1	1	1	1	1	1	1	1	1	1	1	1	1	0	1	1	1	1
P89105	P89105	3	3	3	RNA polymerase-associated protein CTR9	CTR9		1	3	3	3	1	1	0	1	1	1	0	0	0	0	0	0	1	0	1	1	0	0	0	0	0	0	0	1	0	0	0	0	1	0	0	1	1	0	1	1	1	0
Q00055	Q00055	8	7	7	Glycerol-3-phosphate dehydrogenase [NAD(+)] 1	GPD1		1	8	7	7	2	2	2	2	6	5	6	4	6	5	3	2	4	3	2	5	6	5	5	2	6	5	5	4	2	5	6	6	5	3	4	1	1	1	1	5	4	5
Q00402	Q00402	10	10	10	Nuclear migration protein NUM1	NUM1		1	10	10	10	5	5	5	3	5	6	6	3	7	6	7	3	1	3	4	7	6	6	4	3	7	5	7	4	2	7	7	4	5	1	2	5	5	5	3	5	6	6
Q00684	Q00684	2	2	2	Tyrosine-protein phosphatase CDC14	CDC14		1	2	2	2	1	0	0	0	0	0	0	0	0	0	0	0	0	1	1	0	0	0	0	0	0	0	0	0	0	0	0	0	0	0	0	1	0	0	0	0	0	0
Q00711;P47052	Q00711	39;6	39;6	39;6	Succinate dehydrogenase [ubiquinone] flavoprotein subunit, mitochondrial	SDH1		2	39	39	39	25	17	29	23	23	25	30	27	20	20	15	18	13	9	6	19	17	13	28	9	17	14	17	22	3	18	15	11	26	6	6	25	17	29	23	23	25	30
Q00764	Q00764	10	10	10	Alpha,alpha-trehalose-phosphate synthase [UDP-forming] 56 kDa subunit	TPS1		1	10	10	10	4	3	4	3	4	4	6	4	5	6	3	3	2	3	1	4	3	2	5	2	3	4	4	4	2	4	4	2	4	2	2	4	3	4	3	4	4	6
Q01080	Q01080	6	6	6	DNA-directed RNA polymerase I subunit RPA49	RPA49		1	6	6	6	0	1	2	1	0	1	0	0	1	0	0	0	0	4	2	0	1	0	1	0	0	1	0	1	0	0	0	0	0	1	0	0	1	2	1	0	1	0
Q01448;P03876	Q01448	23;1	23;1	23;1	Histone promoter control protein 2	HPC2		2	23	23	23	7	4	6	2	9	6	6	5	5	4	5	2	5	13	12	6	4	3	6	4	5	5	4	2	2	6	5	7	3	1	2	7	4	6	2	9	6	6
Q01477	Q01477	11	11	11	Ubiquitin carboxyl-terminal hydrolase 3	UBP3		1	11	11	11	3	5	5	7	4	3	3	6	3	4	3	4	5	6	5	4	5	3	4	3	3	4	3	6	4	3	5	5	4	1	3	3	5	5	7	4	3	3
Q01519	Q01519	3	3	3	Cytochrome c oxidase subunit 6B	COX12		1	3	3	3	1	1	0	0	1	1	1	1	2	1	1	0	0	0	1	0	1	1	1	0	1	1	1	0	1	1	1	1	0	0	0	1	1	0	0	1	1	1
Q01560	Q01560	17	17	17	Nucleolar protein 3	NPL3		1	17	17	17	10	11	9	7	12	7	11	4	11	9	9	4	3	0	2	10	11	7	8	2	13	12	8	11	2	11	11	9	10	3	2	10	11	9	7	12	7	11
Q01574	Q01574	25	25	25	Acetyl-coenzyme A synthetase 1	ACS1		1	25	25	25	1	3	7	4	9	8	12	9	9	10	10	6	8	16	10	9	9	8	12	8	10	9	13	11	5	12	14	8	9	5	10	1	3	7	4	9	8	12
Q01722	Q01722	4	4	4	Glycolytic genes transcriptional activator GCR2	GCR2		1	4	4	4	2	3	4	2	2	1	0	1	0	0	1	0	0	0	2	0	0	0	0	0	0	0	0	0	0	1	1	0	0	0	0	2	3	4	2	2	1	0
Q01855	Q01855	4	4	4	40S ribosomal protein S15	RPS15		1	4	4	4	1	2	1	1	1	2	2	2	3	2	2	2	1	2	1	3	2	1	2	0	2	2	2	1	1	1	2	2	1	1	1	1	2	1	1	1	2	2
Q02100	Q02100	5	5	5	CRE-binding bZIP protein SKO1	SKO1		1	5	5	5	4	2	1	1	3	2	1	2	4	2	2	2	2	2	3	3	2	4	3	1	4	3	1	2	1	3	1	4	1	0	0	4	2	1	1	3	2	1
Q02206	Q02206	2	2	2	Chromatin structure-remodeling complex subunit RSC4	RSC4		1	2	2	2	0	0	1	0	0	0	0	0	1	0	1	0	0	0	0	2	0	1	0	0	0	0	1	0	0	0	0	0	0	0	0	0	0	1	0	0	0	0
Q02207	Q02207	2	2	2	Peroxisomal hydratase-dehydrogenase-epimerase;2-enoyl-CoA hydratase;(3R)-3-hydroxyacyl-CoA dehydrogenase	FOX2		1	2	2	2	0	0	0	0	0	0	0	0	0	0	0	0	0	1	0	0	0	0	0	0	0	0	0	0	0	0	0	1	0	0	1	0	0	0	0	0	0	0
Q02208	Q02208	20	20	20	Topoisomerase 1-associated factor 2	TOF2		1	20	20	20	5	7	10	8	7	6	5	5	6	8	7	6	12	11	13	8	7	5	4	6	6	9	4	3	3	8	5	8	3	0	1	5	7	10	8	7	6	5
Q02209	Q02209	2	2	2	Uncharacterized protein YKR011C			1	2	2	2	1	1	2	0	2	1	1	0	1	1	1	0	1	1	2	2	2	0	2	1	0	0	0	1	0	2	1	1	1	0	1	1	1	2	0	2	1	1
Q02326	Q02326	4	4	3	60S ribosomal protein L6-A	RPL6A		1	4	4	3	1	0	1	1	0	1	1	0	1	1	0	1	1	1	3	2	1	1	2	1	1	1	1	1	3	2	1	1	0	0	1	1	0	1	1	0	1	1
Q02457	Q02457	5	5	5	Protein TBF1	TBF1		1	5	5	5	0	0	0	0	0	0	0	0	0	0	0	0	1	5	1	0	0	0	0	1	0	0	0	0	0	0	0	0	0	0	0	0	0	0	0	0	0	0
Q02486	Q02486	7	7	7	ARS-binding factor 2, mitochondrial	ABF2		1	7	7	7	4	2	3	3	1	3	5	3	6	3	2	4	2	0	2	2	3	3	2	4	3	1	3	4	4	3	5	3	5	1	1	4	2	3	3	1	3	5
Q02642	Q02642	7	7	7	Nascent polypeptide-associated complex subunit beta-1	EGD1		1	7	7	7	5	3	5	5	5	5	4	5	5	5	5	5	2	2	4	5	4	3	6	4	5	4	6	5	4	5	5	3	6	0	3	5	3	5	5	5	5	4
Q02647	Q02647	1	1	1	Dynein light chain 1, cytoplasmic	DYN2		1	1	1	1	1	0	1	0	0	1	0	1	1	0	1	1	0	0	0	1	0	0	0	0	0	0	0	0	0	0	1	0	0	0	0	1	0	1	0	0	1	0
Q02724	Q02724	42	42	42	Ubiquitin-like-specific protease 1	ULP1		1	42	42	42	18	22	31	24	16	19	11	22	18	17	13	24	22	13	22	23	23	11	33	11	14	19	22	31	8	18	23	18	25	11	15	18	22	31	24	16	19	11
Q02753	Q02753	19	19	2	60S ribosomal protein L21-A	RPL21A		1	19	19	2	9	7	8	9	11	10	12	11	10	9	10	8	7	14	11	12	8	12	8	9	11	9	9	9	9	8	10	7	7	1	8	9	7	8	9	11	10	12
Q02775	Q02775	1	1	1	Pre-mRNA-splicing factor SLU7	SLU7		1	1	1	1	0	0	0	0	0	0	0	0	1	0	0	0	0	1	1	0	0	0	1	0	0	0	0	0	0	0	0	0	1	0	0	0	0	0	0	0	0	0
Q02793	Q02793	3	3	3	Antiviral protein SKI8	SKI8		1	3	3	3	0	0	0	0	0	0	0	1	0	0	0	1	0	0	0	0	0	0	1	0	0	0	0	1	0	0	0	0	3	1	0	0	0	0	0	0	0	0
Q02821	Q02821	1	1	1	Importin subunit alpha	SRP1		1	1	1	1	1	1	1	0	0	0	0	1	0	0	0	0	1	0	0	1	0	0	0	1	0	1	0	0	0	0	0	0	1	0	0	1	1	1	0	0	0	0
Q02883	Q02883	2	2	2	N-acyl-phosphatidylethanolamine-hydrolyzing phospholipase D, mitochondrial	FMP30		1	2	2	2	0	0	1	2	0	0	0	1	0	0	0	2	1	0	0	0	0	0	1	1	0	1	0	1	0	0	0	0	1	0	0	0	0	1	2	0	0	0
Q02884	Q02884	1	1	1	Elongator complex protein 4	ELP4		1	1	1	1	1	1	1	1	1	1	1	1	1	1	1	1	1	0	0	1	1	1	1	1	1	1	1	1	0	1	1	1	1	0	1	1	1	1	1	1	1	1
Q02933	Q02933	1	1	1	Ribonuclease T2-like	RNY1		1	1	1	1	0	0	0	0	1	0	1	0	1	0	0	0	0	1	0	1	1	0	0	1	1	1	0	0	1	0	1	1	0	0	1	0	0	0	0	1	0	1
Q02950	Q02950	1	1	1	37S ribosomal protein MRP51, mitochondrial	MRP51		1	1	1	1	0	0	0	0	0	0	0	0	0	0	0	0	0	1	0	0	0	0	0	0	0	0	0	0	0	0	0	0	0	0	0	0	0	0	0	0	0	0
Q02959	Q02959	7	7	7	Histone deacetylase HOS3	HOS3		1	7	7	7	3	5	4	4	2	2	1	3	3	1	1	1	2	2	0	1	2	1	3	1	1	1	2	4	1	2	2	1	2	0	1	3	5	4	4	2	2	1
Q02961	Q02961	1	1	1	Putative 2-hydroxyacid dehydrogenase YPL113C	YPL113C		1	1	1	1	0	0	0	0	0	0	0	0	0	0	0	0	0	1	0	0	0	0	0	0	0	0	0	0	0	0	0	0	0	0	0	0	0	0	0	0	0	0
Q02979	Q02979	5	5	5	Glycerophosphodiester phosphodiesterase GDE1	GDE1		1	5	5	5	3	4	3	2	3	4	2	1	3	2	0	0	1	0	0	3	3	1	0	1	3	3	3	2	1	3	2	2	3	0	2	3	4	3	2	3	4	2
Q03012	Q03012	8	8	8	COMPASS component SPP1	SPP1		1	8	8	8	0	1	0	1	2	2	2	3	4	5	4	5	6	5	3	4	2	2	5	2	2	3	3	3	1	3	3	2	2	1	0	0	1	0	1	2	2	2
Q03028	Q03028	2	2	2	Mitochondrial 2-oxodicarboxylate carrier 1	ODC1		1	2	2	2	0	0	0	0	0	0	0	0	0	0	0	0	0	2	0	0	0	0	0	0	0	0	0	0	0	0	0	0	0	0	0	0	0	0	0	0	0	0
Q03048	Q03048	5	5	5	Cofilin	COF1		1	5	5	5	0	0	0	0	0	0	1	0	2	2	2	0	0	5	0	0	1	1	0	1	1	2	0	0	2	0	1	2	0	0	1	0	0	0	0	0	0	1
Q03175	Q03175	1	1	1	Dehydrodolichyl diphosphate syntase complex subunit SRT1	SRT1		1	1	1	1	0	0	0	0	0	0	0	0	0	0	0	0	0	0	0	0	0	0	0	0	0	0	0	1	0	0	0	0	0	0	0	0	0	0	0	0	0	0
Q03177	Q03177	4	4	4	WD repeat-containing protein YMR102C			1	4	4	4	1	3	2	3	1	0	2	2	1	1	1	2	2	3	0	1	1	0	2	1	3	1	1	3	1	1	1	1	2	0	1	1	3	2	3	1	0	2
Q03201	Q03201	1	1	1	37S ribosomal protein S10, mitochondrial	RSM10		1	1	1	1	0	0	0	0	1	0	1	0	1	1	1	0	0	0	0	0	0	1	0	0	1	0	0	0	0	1	0	0	0	0	0	0	0	0	0	1	0	1
Q03262	Q03262	6	6	6	Phosphoribomutase	PRM15		1	6	6	6	5	4	4	5	2	3	2	2	3	3	1	2	2	0	1	3	2	1	3	1	2	3	2	5	1	2	3	1	4	1	2	5	4	4	5	2	3	2
Q03280	Q03280	2	2	2	E3 ubiquitin-protein ligase TOM1	TOM1		1	2	2	2	0	0	0	1	0	0	0	1	0	0	0	1	0	1	0	0	0	0	1	0	0	0	1	2	0	0	1	0	2	0	0	0	0	0	1	0	0	0
Q03323	Q03323	3	3	3	COMPASS component SDC1	SDC1		1	3	3	3	2	2	2	2	2	2	2	2	2	2	2	2	1	1	2	2	2	2	3	2	2	3	2	2	1	3	2	2	2	0	1	2	2	2	2	2	2	2
Q03330	Q03330	5	5	5	Histone acetyltransferase GCN5	GCN5		1	5	5	5	5	4	5	4	4	4	3	4	4	4	3	3	3	3	3	3	3	3	3	1	2	3	3	3	2	3	3	1	4	0	1	5	4	5	4	4	4	3
Q03361	Q03361	11	11	11	Uncharacterized protein JIP4	JIP4		1	11	11	11	3	1	3	4	4	2	3	2	3	2	4	3	4	7	3	1	2	2	4	2	3	2	2	3	3	2	3	1	2	1	2	3	1	3	4	4	2	3
Q03373	Q03373	1	1	1	Down-regulator of invasive growth 2	DIG2		1	1	1	1	0	0	0	1	0	0	0	1	0	0	0	1	0	1	1	0	0	0	1	0	0	0	0	0	0	0	0	0	0	0	0	0	0	0	1	0	0	0
Q03388	Q03388	6	6	6	Vacuolar protein sorting-associated protein 72	VPS72		1	6	6	6	4	6	5	3	4	3	4	3	5	5	4	2	2	2	4	4	5	4	3	1	4	4	4	1	0	5	4	4	3	0	2	4	6	5	3	4	3	4
Q03390	Q03390	1	1	1	Vacuolar protein-sorting-associated protein 60	VPS60		1	1	1	1	0	0	0	1	0	0	0	1	0	0	0	0	0	0	1	0	0	0	0	0	0	0	0	0	0	0	0	0	0	0	0	0	0	0	1	0	0	0
Q03435	Q03435	9	9	9	Non-histone protein 10	NHP10		1	9	9	9	5	5	6	5	6	6	6	4	6	6	6	3	5	5	7	5	5	5	6	5	6	6	6	3	4	6	5	6	4	1	5	5	5	6	5	6	6	6
Q03532	Q03532	2	2	2	ATP-dependent RNA helicase HAS1	HAS1		1	2	2	2	0	0	0	0	0	0	0	0	0	0	0	1	0	1	0	0	0	0	0	0	0	0	0	0	0	0	0	0	0	0	0	0	0	0	0	0	0	0
Q03630	Q03630	1	1	1	Trafficking protein particle complex subunit BET5	BET5		1	1	1	1	0	0	0	0	0	0	0	0	1	1	0	0	1	0	0	1	0	0	0	1	0	1	0	0	0	1	1	1	0	0	1	0	0	0	0	0	0	0
Q03653	Q03653	4	4	4	Protein EFR3	EFR3		1	4	4	4	0	0	0	1	0	0	0	0	0	0	0	1	0	2	0	1	0	0	1	0	0	0	0	1	0	0	1	0	0	0	0	0	0	0	1	0	0	0
Q03661	Q03661	11	11	11	Silent chromatin protein ESC1	ESC1		1	11	11	11	3	2	4	1	5	3	4	5	7	4	4	4	5	3	7	8	8	4	7	3	7	8	6	8	2	8	8	8	8	1	3	3	2	4	1	5	3	4
Q03690	Q03690	4	4	4	Clustered mitochondria protein 1	CLU1		1	4	4	4	1	1	1	2	0	2	1	1	2	2	2	2	1	2	1	2	3	1	1	2	2	2	2	2	2	2	2	2	2	0	2	1	1	1	2	0	2	1
Q03695	Q03695	1	1	1	Uncharacterized protein YMR206W			1	1	1	1	1	1	1	1	1	1	1	0	0	0	1	0	0	0	0	0	0	0	0	0	1	0	1	0	1	0	0	0	0	0	0	1	1	1	1	1	1	1
Q03735	Q03735	1	1	1	RNA-binding protein NAB6	NAB6		1	1	1	1	1	0	1	1	1	0	0	1	1	1	1	0	0	0	1	1	1	1	1	0	1	1	1	1	0	1	1	1	1	0	0	1	0	1	1	1	0	0
Q03750	Q03750	2	2	2	Transcription initiation factor TFIID subunit 8	TAF8		1	2	2	2	2	2	2	1	2	2	2	1	2	2	2	1	0	0	1	2	2	2	2	0	2	2	2	1	0	2	2	2	1	0	0	2	2	2	1	2	2	2
Q03761	Q03761	2	2	2	Transcription initiation factor TFIID subunit 12	TAF12		1	2	2	2	2	0	2	0	1	1	0	0	1	0	0	0	0	0	0	1	0	0	2	0	2	1	0	1	0	2	1	1	1	0	0	2	0	2	0	1	1	0
Q03772	Q03772	4	4	4	Pre-mRNA-splicing factor CWC15	CWC15		1	4	4	4	0	3	2	0	2	1	1	0	1	3	1	0	1	0	0	2	2	2	1	2	2	2	2	1	1	2	2	3	1	0	1	0	3	2	0	2	1	1
Q03774	Q03774	2	2	2	tRNA (guanine-N(7)-)-methyltransferase non-catalytic subunit TRM82	TRM82		1	2	2	2	2	0	1	2	1	2	0	1	1	1	1	1	2	0	0	1	1	1	1	0	1	0	1	2	0	0	0	0	1	0	0	2	0	1	2	1	2	0
Q03785	Q03785	1	1	1	Serine/threonine-protein kinase VHS1	VHS1		1	1	1	1	0	0	0	1	0	0	0	1	0	0	0	0	0	0	0	0	0	0	1	1	0	0	0	0	1	0	0	0	1	0	1	0	0	0	1	0	0	0
Q03829	Q03829	1	1	1	Uncharacterized mitochondrial carrier YMR166C			1	1	1	1	0	0	0	0	0	0	0	0	0	0	0	0	1	0	0	0	0	0	0	0	0	0	0	0	0	0	0	0	0	0	0	0	0	0	0	0	0	0
Q03834	Q03834	1	1	1	DNA mismatch repair protein MSH6	MSH6		1	1	1	1	1	1	1	1	1	1	1	1	1	1	1	1	1	1	1	1	1	1	1	1	1	1	1	1	1	1	1	1	1	0	1	1	1	1	1	1	1	1
Q03835	Q03835	1	1	1	Monothiol glutaredoxin-3	GRX3		1	1	1	1	0	0	0	0	0	0	0	1	0	0	0	0	0	1	0	0	0	0	0	0	1	0	0	0	1	0	0	0	0	0	0	0	0	0	0	0	0	0
Q03898	Q03898	3	3	3	Filament protein FIN1	FIN1		1	3	3	3	0	0	1	1	1	1	1	1	1	0	0	1	2	2	1	1	1	0	2	0	1	1	1	1	0	1	1	1	2	0	1	0	0	1	1	1	1	1
Q03937	Q03937	7	7	7	Meiosis-specific protein HED1	HED1		1	7	7	7	1	0	1	0	0	1	0	1	0	0	0	1	1	3	1	1	1	0	4	0	0	1	1	2	0	1	1	0	2	1	1	1	0	1	0	0	1	0
Q03940	Q03940	1	1	1	RuvB-like protein 1	RVB1		1	1	1	1	1	0	0	0	0	0	0	0	1	0	0	0	0	0	0	0	0	0	0	0	0	0	0	0	0	0	0	0	0	0	0	1	0	0	0	0	0	0
Q03973	Q03973	14	14	14	High mobility group protein 1	HMO1		1	14	14	14	9	8	10	6	6	7	5	5	6	6	6	4	3	7	7	3	4	4	3	3	3	5	3	3	3	4	5	4	4	2	3	9	8	10	6	6	7	5
Q03981	Q03981	1	1	1	COP9 signalosome complex subunit 9	CSN9		1	1	1	1	0	0	0	1	0	0	0	1	0	0	0	1	0	0	0	0	0	0	1	0	0	0	0	1	0	0	0	0	1	0	0	0	0	0	1	0	0	0
Q04002	Q04002	2	2	2	Sister chromatid cohesion protein 2	SCC2		1	2	2	2	0	0	0	0	0	0	1	0	0	0	0	0	1	1	0	1	0	1	1	0	0	1	0	0	1	1	0	1	2	0	0	0	0	0	0	0	0	1
Q04031	Q04031	2	2	2	Ribosomal RNA-processing protein 17	RRP17		1	2	2	2	2	1	1	1	1	0	0	2	2	0	0	1	0	0	1	1	0	1	1	0	1	0	1	0	0	1	0	1	0	0	0	2	1	1	1	1	0	0
Q04062	Q04062	1	1	1	26S proteasome regulatory subunit RPN9	RPN9		1	1	1	1	0	0	0	1	0	0	0	1	0	0	0	1	0	0	0	0	0	0	1	0	1	0	0	1	0	0	0	0	1	0	0	0	0	0	1	0	0	0
Q04087	Q04087	21	21	21	Monopolin complex subunit LRS4	LRS4		1	21	21	21	10	14	13	7	12	9	8	9	11	11	9	9	10	9	12	10	9	8	8	7	6	8	5	7	2	9	2	6	4	1	2	10	14	13	7	12	9	8
Q04110	Q04110	41	41	41	Protein ECM11	ECM11		1	41	41	41	1	3	3	2	2	3	3	3	11	12	12	17	13	12	24	34	27	30	24	20	29	33	30	23	14	31	31	29	21	9	16	1	3	3	2	2	3	3
;346120;346121;346122;346123;346124;346125;346126;346127;346128;346129;346130;346131;346132;346133;346134;346135;346136;346137;346138;346139;346140;346141;346142;346143;346144;346145;346146;346147;346148;346149;346150;346151;346152;346153;346154;346155;346156;346157;346158;346159;346160;346161;346162;346163;346164;346165;346166;346167;346168;346169;346170;346171;346172;346173;346174;346175;346176…
9;350800;350801;350802;350803;350804;350805;350806;350807;350808;350809;350810;350811;350812;350813;350814;350815;350816;350817;350818;350819;350820;350821;350822;350823;350824;350825;350826;350827;350828;350829;350830;350831;350832;350833;350834;350835;350836;350837;350838;350839;350840;350841;350842;350843;350844;350845;350846;350847;350848;350849;350850;350851;350852;350853;350854;350855;35085…	1771;28585;29278;48460;50844;54691;54966;90243;110686;138158;138246;151519;155816;155820;171174;173338;176278;176485;187912;213035;226359;255826;294745;294806;314444;314591;315517;315620;324159;325745;325746;325776;331732;345839;346796;350685;351678;367813;367839;383033;396200	2055;2056;2057;2058;2059;2060;2061;2062;2063;2064;2065;2066;2067;2068;2069;2070;2071;2072;2073;2074;2075	389;390	127;128;129;130;131;132;133;134;135;136;238;239;240;241;242;243;244;283;284	5;20;25;31;51;55;60;88;101;115;116;127;138;143;144;146;160;173;175;196;292	1;210	2;6;9;10;13;15;16;19;22;24;111;130;134;159;162;168;169;170;176
Q04119	Q04119	2	2	2	Endopolyphosphatase	PPN1		1	2	2	2	0	0	1	0	1	1	1	0	1	1	1	0	0	2	0	1	1	1	0	1	1	1	1	0	1	1	1	1	0	0	1	0	0	1	0	1	1	1
Q04120	Q04120	1	1	1	Peroxiredoxin TSA2	TSA2		1	1	1	1	0	0	0	0	1	0	1	0	1	1	1	0	0	0	0	1	1	1	0	0	1	1	1	0	0	0	1	1	0	0	0	0	0	0	0	1	0	1
Q04195	Q04195	5	5	5	E3 SUMO-protein ligase SIZ1	SIZ1		1	5	5	5	2	2	2	1	2	2	1	3	1	0	1	2	1	2	1	3	1	1	4	0	2	1	1	3	0	2	1	1	3	0	0	2	2	2	1	2	2	1
Q04235	Q04235	1	1	1	tRNA wybutosine-synthesizing protein 2	TRM12		1	1	1	1	0	0	0	1	0	0	0	0	0	0	0	0	0	0	0	0	0	0	0	0	0	0	0	1	0	0	0	0	0	0	0	0	0	0	1	0	0	0
Q04264	Q04264	5	5	5	Sister chromatid cohesion protein PDS5	PDS5		1	5	5	5	1	0	0	1	1	1	1	1	2	1	1	3	2	2	3	2	2	0	2	1	0	2	3	1	1	1	1	1	1	0	1	1	0	0	1	1	1	1
Q04299	Q04299	7	7	7	Probable ADP-ribose 1-phosphate phosphatase YML087W			1	7	7	7	4	4	7	5	1	3	3	4	3	3	2	3	1	1	0	3	1	2	2	0	2	2	3	3	0	4	1	2	4	0	1	4	4	7	5	1	3	3
Q04344	Q04344	12	12	12	Hit family protein 1	HNT1		1	12	12	12	10	9	9	9	7	7	9	8	7	8	9	4	5	2	0	9	8	8	7	5	9	9	9	8	5	10	9	9	8	4	5	10	9	9	9	7	7	9
Q04371	Q04371	2	2	2	Protein-glutamate O-methyltransferase			1	2	2	2	0	0	1	0	1	0	0	0	1	1	0	1	1	1	0	1	1	0	1	1	0	1	1	0	1	1	1	0	1	0	1	0	0	1	0	1	0	0
Q04399	Q04399	4	4	4	Putative multicopper oxidase GMC1	GMC1		1	4	4	4	0	0	0	0	0	0	0	2	0	0	0	1	0	1	0	0	0	0	1	1	0	0	0	2	0	1	1	0	0	0	0	0	0	0	0	0	0	0
Q04409	Q04409	2	2	2	Putative glucokinase-2	EMI2		1	2	2	2	0	0	0	1	0	0	1	2	2	1	2	0	0	0	0	0	0	1	1	0	0	1	0	0	0	1	0	1	1	0	0	0	0	0	1	0	0	1
Q04412	Q04412	7	7	7	ADP-ribosylation factor GTPase-activating protein effector protein 1	AGE1		1	7	7	7	2	2	1	3	0	0	1	0	2	1	1	0	1	2	3	0	0	0	0	0	0	1	1	1	0	1	0	0	0	0	0	2	2	1	3	0	0	1
Q04418	Q04418	2	2	2	RNA polymerase II-associated protein RBA50	RBA50		1	2	2	2	1	0	1	2	0	1	0	2	1	0	0	0	0	1	1	1	1	1	1	0	1	1	1	0	0	0	0	1	2	0	0	1	0	1	2	0	1	0
Q04437	Q04437	1	1	1	ATP-dependent DNA helicase II subunit 2	YKU80		1	1	1	1	0	0	0	0	0	0	0	1	0	0	0	1	0	1	0	0	0	0	1	0	0	0	0	1	0	0	0	0	0	0	0	0	0	0	0	0	0	0
Q04438	Q04438	6	6	6	Stationary phase protein 4	SPG4		1	6	6	6	2	1	1	2	1	1	1	3	1	1	1	0	1	0	2	2	1	2	6	0	0	0	0	1	0	0	0	1	0	0	0	2	1	1	2	1	1	1
Q04461	Q04461	4	4	4	Uncharacterized protein YMR111C			1	4	4	4	2	2	2	2	2	2	2	2	2	2	2	2	1	3	1	2	2	2	2	1	2	2	2	2	1	2	2	2	2	0	1	2	2	2	2	2	2	2
Q04511	Q04511	1	1	1	Ubiquitin ligase complex F-box protein UFO1	UFO1		1	1	1	1	0	0	1	0	0	0	0	0	0	0	0	0	0	0	0	0	0	0	0	0	0	0	0	0	0	0	0	0	0	0	0	0	0	1	0	0	0	0
Q04603	Q04603	1	1	1	DNA polymerase epsilon subunit D	DPB4		1	1	1	1	0	0	0	0	0	0	0	0	0	0	0	1	0	0	1	0	0	0	1	0	0	0	0	0	0	0	0	0	0	0	0	0	0	0	0	0	0	0
Q04636	Q04636	4	4	4	FACT complex subunit POB3	POB3		1	4	4	4	4	4	4	3	4	4	4	4	4	4	3	3	4	3	3	4	3	4	4	4	4	4	4	4	3	3	4	4	3	0	3	4	4	4	3	4	4	4
Q04689	Q04689	11	11	11	Altered inheritance of mitochondria protein 32	AIM32		1	11	11	11	7	8	10	10	7	6	8	8	6	5	7	7	2	4	0	6	7	5	8	1	4	5	5	7	1	5	4	5	7	2	1	7	8	10	10	7	6	8
Q04792	Q04792	10	10	10	Glutamate decarboxylase	GAD1		1	10	10	10	3	5	6	6	1	3	3	4	2	1	1	3	3	0	1	5	2	0	2	1	0	1	2	2	0	3	2	0	3	0	2	3	5	6	6	1	3	3
Q04869	Q04869	1	1	1	Uncharacterized protein YMR315W			1	1	1	1	0	0	0	0	0	0	1	0	0	0	0	0	0	0	0	0	0	0	0	0	0	0	0	0	0	0	0	0	0	0	0	0	0	0	0	0	0	1
Q04947	Q04947	1	1	1	Reticulon-like protein 1	RTN1		1	1	1	1	0	0	0	0	0	0	0	0	0	0	0	0	1	0	1	1	1	0	1	0	0	0	0	0	0	0	1	0	1	0	0	0	0	0	0	0	0	0
Q04958	Q04958	3	3	3	Lysophospholipase NTE1	NTE1		1	3	3	3	0	0	0	0	0	0	0	0	1	0	0	0	0	2	0	0	0	0	0	0	0	0	0	0	0	0	0	0	0	0	0	0	0	0	0	0	0	0
Q04964	Q04964	4	4	4	Ribonucleotide reductase inhibitor protein SML1	SML1		1	4	4	4	1	1	1	0	0	0	0	0	1	0	0	0	0	0	1	0	1	0	4	0	1	1	1	0	0	1	0	0	0	0	0	1	1	1	0	0	0	0
Q05016	Q05016	2	2	2	Uncharacterized oxidoreductase YMR226C			1	2	2	2	0	0	0	1	0	0	1	1	1	1	1	0	0	0	1	0	0	1	0	0	1	1	0	0	0	0	1	1	0	0	0	0	0	0	1	0	0	1
Q05021	Q05021	2	2	2	Transcription initiation factor TFIID subunit 7	TAF7		1	2	2	2	2	1	1	2	1	1	2	2	2	1	1	1	2	1	2	1	1	1	2	1	1	2	1	2	2	2	2	2	2	0	1	2	1	1	2	1	1	2
Q05024	Q05024	10	10	10	Protein TRI1	TRI1		1	10	10	10	7	5	4	4	4	3	4	4	5	4	5	5	5	4	5	8	7	5	5	3	8	8	6	5	3	9	7	7	7	1	3	7	5	4	4	4	3	4
Q05043	Q05043	6	6	6	Respiration factor 1	RSF1		1	6	6	6	5	1	1	1	2	1	2	1	3	1	1	2	1	1	3	2	3	1	4	0	4	1	1	1	0	2	2	1	1	0	1	5	1	1	1	2	1	2
Q05050	Q05050	2	2	2	Eisosome protein 1	EIS1		1	2	2	2	0	0	0	0	0	0	0	1	1	0	0	2	0	1	2	0	1	0	1	0	0	0	0	2	1	1	0	0	2	0	0	0	0	0	0	0	0	0
Q05471	Q05471	4	4	4	Helicase SWR1	SWR1		1	4	4	4	0	0	0	0	0	0	0	0	0	0	0	0	0	2	1	0	0	0	0	0	0	0	0	1	0	0	0	0	1	0	0	0	0	0	0	0	0	0
Q05506	Q05506	1	1	1	Arginine--tRNA ligase, cytoplasmic			1	1	1	1	0	0	0	0	0	1	1	0	1	0	0	0	0	0	0	0	0	0	0	0	1	1	0	0	1	0	0	0	0	0	0	0	0	0	0	0	1	1
Q05543	Q05543	1	1	1	Regulator of Ty1 transposition protein 103	RTT103		1	1	1	1	0	0	0	0	0	0	0	0	0	0	0	0	0	1	0	0	0	0	0	0	0	0	0	0	0	0	0	0	1	0	0	0	0	0	0	0	0	0
Q05549	Q05549	3	3	3	Putative ATP-dependent helicase HRQ1	HRQ1		1	3	3	3	2	0	1	2	2	1	1	2	2	1	3	2	1	1	2	2	2	2	2	2	2	3	2	2	1	2	2	1	2	0	1	2	0	1	2	2	1	1
Q05580;P53823;P43544	Q05580	10;1;1	10;1;1	10;1;1	E3 ubiquitin-protein ligase HEL2	HEL2		3	10	10	10	5	6	6	7	2	4	2	2	2	1	4	2	3	1	1	3	2	1	3	2	1	1	1	4	0	2	1	1	3	1	2	5	6	6	7	2	4	2
Q05610	Q05610	1	1	1	Donuts protein 1	DON1		1	1	1	1	0	0	0	0	0	0	0	0	0	0	0	1	0	0	1	0	0	0	1	0	0	0	0	1	0	0	0	0	1	0	0	0	0	0	0	0	0	0
Q05775	Q05775	3	3	3	Eukaryotic translation initiation factor 3 subunit J	HCR1		1	3	3	3	1	1	1	1	1	1	1	1	1	1	1	1	1	1	2	1	1	1	2	0	1	1	1	1	1	1	1	1	1	0	1	1	1	1	1	1	1	1
Q05854	Q05854	1	1	1	Uncharacterized transcriptional regulatory protein YLR278C			1	1	1	1	0	1	0	1	1	0	0	1	1	1	1	1	0	0	1	1	0	0	0	0	0	0	1	0	0	0	0	0	0	0	0	0	1	0	1	1	0	0
Q05900	Q05900	8	8	8	U1 small nuclear ribonucleoprotein C	YHC1		1	8	8	8	3	3	4	5	3	3	4	7	2	3	3	2	3	4	3	2	3	2	4	3	3	3	3	5	3	2	3	2	6	2	3	3	3	4	5	3	3	4
Q05911	Q05911	3	3	3	Adenylosuccinate lyase	ADE13		1	3	3	3	1	0	1	1	1	2	1	1	1	1	2	2	1	0	0	1	1	1	2	0	1	1	1	1	1	1	1	1	1	0	0	1	0	1	1	1	2	1
Q05937	Q05937	1	1	1	Zinc finger protein STP3	STP3		1	1	1	1	0	0	0	0	0	0	0	0	0	0	0	0	0	1	0	0	0	0	0	0	0	0	0	0	0	0	0	0	0	0	0	0	0	0	0	0	0	0
Q06001	Q06001	1	1	1	Factor arrest protein 10	FAR10		1	1	1	1	0	0	0	0	1	1	1	0	1	1	1	0	0	0	0	1	1	1	1	0	1	1	1	0	0	1	1	1	0	0	1	0	0	0	0	1	1	1
Q06010	Q06010	6	6	6	A-factor-processing enzyme	STE23		1	6	6	6	2	3	2	1	2	2	1	1	1	2	1	1	0	1	1	1	2	2	1	1	2	1	2	2	1	1	2	1	2	0	1	2	3	2	1	2	2	1
Q06032	Q06032	17	17	17	Chromosome stability protein 9	CST9		1	17	17	17	0	0	0	1	3	5	3	5	7	7	8	7	5	5	8	13	10	9	11	6	10	12	14	11	5	11	10	9	6	2	4	0	0	0	1	3	5	3
Q06106	Q06106	1	1	1	Multiple RNA-binding domain-containing protein 1	MRD1		1	1	1	1	0	0	0	0	0	0	0	0	0	0	0	0	0	1	0	0	0	0	0	0	0	0	0	0	0	0	0	0	0	0	0	0	0	0	0	0	0	0
Q06137	Q06137	2	2	2	Putative 6-phosphofructo-2-kinase/fructose-2,6-bisphosphatase YLR345W;6-phosphofructo-2-kinase;Fructose-2,6-bisphosphatase	YLR345W		1	2	2	2	0	0	0	1	0	0	0	1	0	0	0	0	1	1	0	0	0	0	0	0	0	0	0	1	0	0	0	0	1	0	0	0	0	0	1	0	0	0
Q06151	Q06151	11	10	10	m7GpppX diphosphatase	DCS1		1	11	10	10	5	4	8	7	5	7	7	5	5	5	6	4	4	4	1	4	7	4	5	4	5	3	6	4	3	4	6	2	8	2	2	5	4	7	6	5	7	7
Q06156	Q06156	4	4	4	Condensin complex subunit 1	YCS4		1	4	4	4	2	1	2	2	2	1	1	2	2	2	1	3	2	1	3	2	3	1	1	0	1	3	2	2	0	3	2	1	1	0	0	2	1	2	2	2	1	1
Q06164	Q06164	1	1	1	E3 ubiquitin-protein ligase substrate receptor MMS22	MMS22		1	1	1	1	0	1	0	0	0	0	0	1	0	0	0	0	0	0	0	0	0	1	0	0	1	0	0	0	1	1	0	0	0	0	0	0	1	0	0	0	0	0
Q06177	Q06177	3	3	3	Translation machinery-associated protein 10	TMA10		1	3	3	3	1	1	1	3	0	1	0	2	1	0	0	1	0	2	0	0	0	0	2	0	1	1	0	1	1	0	0	1	1	0	0	1	1	1	3	0	1	0
Q06178;P53204	Q06178	23;7	23;7	23;7	Nicotinamide/nicotinic acid mononucleotide adenylyltransferase 1	NMA1		2	23	23	23	8	12	13	17	6	8	11	11	4	8	8	6	1	5	8	3	10	6	5	1	4	4	5	11	1	4	6	6	7	1	2	8	12	13	17	6	8	11
Q06188	Q06188	4	4	4	PWWP domain-containing protein YLR455W	YLR455W		1	4	4	4	3	2	3	4	4	3	3	3	2	2	3	4	3	3	4	3	3	2	4	3	2	3	2	3	2	4	3	3	4	1	3	3	2	3	4	4	3	3
Q06201	Q06201	6	6	6	Grand meiotic recombination cluster protein 2	GMC2		1	6	6	6	0	0	0	0	0	0	0	0	1	2	1	3	2	2	1	6	3	5	6	4	3	5	5	6	2	6	4	4	3	2	2	0	0	0	0	0	0	0
Q06252	Q06252	3	3	3	Uncharacterized protein YLR179C			1	3	3	3	0	0	0	0	0	0	1	0	0	0	1	1	0	2	1	0	0	0	1	0	1	1	0	0	1	0	0	0	0	0	0	0	0	0	0	0	0	1
Q06263	Q06263	1	1	1	Vacuolar protein sorting-associated protein VTA1	VTA1		1	1	1	1	1	0	1	1	1	0	1	1	1	0	1	1	1	0	1	1	1	0	1	0	0	0	1	1	1	1	0	1	1	0	0	1	0	1	1	1	0	1
Q06266	Q06266	1	1	1	Protein TOS4	TOS4		1	1	1	1	0	0	0	0	0	1	0	0	0	0	0	0	0	0	0	0	0	0	1	0	0	0	0	0	0	0	0	0	0	0	0	0	0	0	0	0	1	0
Q06340	Q06340	1	1	1	Protein ESC2	ESC2		1	1	1	1	0	0	0	0	0	0	0	0	0	0	0	0	0	0	1	0	0	0	0	0	0	0	1	0	0	0	0	0	0	0	0	0	0	0	0	0	0	0
Q06344	Q06344	4	4	4	Pre-rRNA-processing protein ESF1	ESF1		1	4	4	4	2	0	1	2	1	0	1	1	0	1	1	1	0	2	2	1	0	2	1	0	1	0	1	0	0	1	1	0	0	0	0	2	0	1	2	1	0	1
Q06405	Q06405	7	7	7	ATP synthase subunit f, mitochondrial	ATP17		1	7	7	7	2	3	3	2	3	4	3	3	3	4	4	2	3	3	2	2	3	4	3	1	4	3	3	3	2	1	3	3	4	2	0	2	3	3	2	3	4	3
Q06436	Q06436	2	2	2	RING-finger protein MAG2	MAG2		1	2	2	2	1	1	1	2	0	1	1	2	1	0	0	2	2	1	1	1	1	0	2	2	1	1	1	2	0	1	1	1	2	0	1	1	1	1	2	0	1	1
Q06479	Q06479	3	3	3	F-box protein YLR352W	YLR352W		1	3	3	3	1	1	1	2	0	1	0	2	0	1	0	3	1	1	0	0	0	0	2	1	0	1	0	2	0	0	1	0	1	0	0	1	1	1	2	0	1	0
Q06488	Q06488	7	7	7	Chromatin structure-remodeling complex subunit RSC2	RSC2		1	7	7	7	2	3	3	2	3	2	3	3	2	3	2	1	1	3	4	2	2	3	2	1	2	3	1	2	1	2	2	3	2	0	1	2	3	3	2	3	2	3
Q06497	Q06497	3	3	3	Peroxisomal adenine nucleotide transporter 1	ANT1		1	3	3	3	1	1	0	1	1	2	1	1	0	1	1	1	0	0	0	1	2	2	0	1	2	1	2	0	1	1	1	2	2	0	0	1	1	0	1	1	2	1
Q06505	Q06505	2	2	2	Transcription factor SPN1	SPN1		1	2	2	2	1	0	0	0	0	1	0	1	0	1	0	0	0	2	1	0	0	0	0	0	0	0	1	1	0	0	0	0	0	0	1	1	0	0	0	0	1	0
Q06506	Q06506	2	2	2	Ribosomal RNA-processing protein 9	RRP9		1	2	2	2	0	0	1	0	0	0	0	0	0	0	0	0	0	1	0	0	0	0	0	0	0	0	0	0	0	0	0	0	0	0	0	0	0	1	0	0	0	0
Q06511	Q06511	1	1	1	Ribosomal RNA-processing protein 15	RRP15		1	1	1	1	1	1	1	1	1	1	1	1	1	1	1	1	1	1	1	1	1	1	1	1	1	1	1	1	1	1	1	1	1	1	1	1	1	1	1	1	1	1
Q06512	Q06512	1	1	1	Nucleolar complex protein 4	NOC4		1	1	1	1	0	0	0	0	1	0	0	0	0	0	0	0	0	0	0	0	0	0	0	0	0	0	0	0	0	0	0	0	0	0	0	0	0	0	0	1	0	0
Q06524	Q06524	1	1	1	Protein SUE1, mitochondrial	SUE1		1	1	1	1	0	0	1	0	0	0	1	0	0	0	0	0	0	0	0	1	0	0	0	0	0	1	0	0	0	0	0	0	0	0	0	0	0	1	0	0	0	1
Q06554	Q06554	1	1	1	Uncharacterized ATP-dependent helicase IRC20	IRC20		1	1	1	1	0	0	0	0	0	0	0	0	0	0	0	0	1	0	0	0	0	0	0	0	0	0	0	0	0	0	0	0	0	0	0	0	0	0	0	0	0	0
Q06604	Q06604	2	2	2	Protein BSP1	BSP1		1	2	2	2	1	0	0	1	0	0	0	1	1	0	0	0	1	0	0	0	0	0	2	0	1	0	0	1	0	0	0	0	1	0	0	1	0	0	1	0	0	0
Q06616	Q06616	2	2	2	Nuclear envelope protein YPR174C	YPR174C		1	2	2	2	1	1	1	1	1	1	1	1	2	1	1	2	1	1	2	1	1	1	1	1	1	1	2	0	1	1	1	1	0	0	1	1	1	1	1	1	1	1
Q06624	Q06624	7	7	7	DNA damage tolerance protein RHC31	AOS1		1	7	7	7	2	2	2	3	2	2	2	3	2	2	2	3	2	3	4	2	2	2	3	2	2	2	2	3	2	3	2	3	3	2	2	2	2	2	3	2	2	2
Q06625	Q06625	4	4	4	Glycogen debranching enzyme;4-alpha-glucanotransferase;Amylo-alpha-1,6-glucosidase	GDB1		1	4	4	4	1	1	1	1	1	1	1	1	1	1	1	1	3	2	1	1	1	1	1	1	1	1	1	1	0	1	1	0	2	2	2	1	1	1	1	1	1	1
Q06629	Q06629	1	1	1	HDA1 complex subunit 2	HDA2		1	1	1	1	0	0	0	0	0	0	0	0	0	0	0	0	0	0	0	0	0	0	0	0	0	0	1	0	0	0	0	0	0	0	0	0	0	0	0	0	0	0
Q06680	Q06680	2	2	2	Condensin complex subunit 3	YCG1		1	2	2	2	0	0	0	0	0	0	0	0	0	0	0	0	0	2	0	0	0	0	0	0	0	0	0	0	0	0	1	0	0	0	0	0	0	0	0	0	0	0
Q06683	Q06683	3	3	3	Putative ATP-dependent helicase IRC3	IRC3		1	3	3	3	0	1	0	0	0	0	0	0	1	1	1	0	1	1	1	1	1	1	1	2	1	1	1	0	1	1	1	1	0	0	2	0	1	0	0	0	0	0
Q06703	Q06703	3	3	3	Chitin deacetylase 2	CDA2		1	3	3	3	0	0	0	0	0	0	0	0	0	0	1	0	0	0	0	1	0	0	0	0	0	0	1	1	0	1	1	1	3	2	1	0	0	0	0	0	0	0
Q06705	Q06705	3	3	3	Phosphatidylinositol transfer protein CSR1	CSR1		1	3	3	3	2	1	1	2	2	1	2	2	2	1	1	1	1	0	0	0	1	0	2	1	1	0	1	2	1	0	1	0	1	0	0	2	1	1	2	2	1	2
Q06706	Q06706	1	1	1	Elongator complex protein 1	IKI3		1	1	1	1	0	0	0	0	1	0	0	0	0	0	0	0	0	0	1	1	0	0	0	0	0	0	0	1	0	0	0	0	0	1	0	0	0	0	0	1	0	0
Q07349	Q07349	1	1	1	Uncharacterized protein YDL027C			1	1	1	1	0	0	0	0	0	0	0	0	0	0	0	0	0	0	0	0	0	0	0	0	0	0	0	0	0	1	0	0	0	0	0	0	0	0	0	0	0	0
Q07351	Q07351	2	2	2	Zinc finger protein STP4	STP4		1	2	2	2	0	1	2	1	1	1	0	0	0	0	0	0	0	0	0	0	0	0	0	0	0	0	0	0	0	0	0	0	0	0	0	0	1	2	1	1	1	0
Q07381	Q07381	3	3	3	Ribosome biogenesis protein TSR1	TSR1		1	3	3	3	0	1	1	2	0	0	0	0	0	0	0	0	2	0	0	0	0	0	0	0	0	0	0	0	0	0	0	0	1	0	0	0	1	1	2	0	0	0
Q07478	Q07478	6	6	6	ATP-dependent RNA helicase SUB2	SUB2		1	6	6	6	0	0	1	1	1	1	2	2	2	2	2	1	0	2	3	0	2	1	2	0	2	2	1	2	2	0	2	2	1	0	1	0	0	1	1	1	1	2
Q07505	Q07505	3	3	3	Putative carboxymethylenebutenolidase	YDL086W		1	3	3	3	0	0	0	0	0	0	0	0	0	0	0	0	0	3	0	0	0	0	0	0	0	0	0	0	0	0	0	0	0	0	0	0	0	0	0	0	0	0
Q07532	Q07532	1	1	1	RNA polymerase II nuclear localization protein IWR1	IWR1		1	1	1	1	0	0	0	0	0	0	0	0	0	0	0	0	0	1	0	0	0	0	0	0	0	0	0	0	0	0	0	0	0	0	0	0	0	0	0	0	0	0
Q07551	Q07551	1	1	1	NADPH-dependent alpha-keto amide reductase			1	1	1	1	0	0	0	0	0	0	1	0	0	0	0	0	0	0	0	0	0	0	0	0	0	0	0	0	0	0	0	0	0	0	0	0	0	0	0	0	0	1
Q07653	Q07653	52	52	52	Protein HBT1	HBT1		1	52	52	52	27	22	31	32	33	32	42	28	28	28	33	27	33	28	40	28	30	28	28	20	17	29	26	33	18	19	27	28	32	16	21	27	22	31	32	33	32	42
27675;327676;327677;327678;327679;327680;327681;327682;327683;327684;327685;327686;327687;327688;327689;327690;327691;327692;327693;327694;327695;327696;327697;327698;327699;327700;327701;327702;327703;327704;327705;327706;327707;327708;327709;327710;327711;327712;327713;327714;327715;327716;327717;327718;327719;327720;327721;327722;327723;327724;327725;327726;327727;327728;327729;327730;327731;3…	1854;2023;20295;28151;32343;32545;32554;38023;38042;47511;59777;62826;62837;99074;108935;156062;226921;227396;233327;233363;233401;235904;240957;248622;249690;264446;264461;289481;289545;290134;293155;293460;294654;301554;305401;306302;309472;313475;318907;320367;328061;335162;335252;338650;342183;342878;342958;342980;362606;368214;368215;382391		415;416;417;418;419;420;421	160;161;162;254		315;341;408;507;521;760;960	44;251;956;1034
Q07655;P34761	Q07655	9;1	9;1	9;1	Protein WHI4	WHI4		2	9	9	9	4	4	6	7	3	4	3	5	4	3	3	2	3	1	3	4	4	2	5	2	2	3	3	5	2	3	2	3	4	1	2	4	4	6	7	3	4	3
Q07657	Q07657	7	7	7	Seventh homolog of septin 1	SHS1		1	7	7	7	5	7	5	6	3	4	4	6	3	3	3	5	0	0	7	5	4	2	6	1	5	3	2	5	1	5	3	2	5	1	0	5	7	5	6	3	4	4
Q07716	Q07716	1	1	1	Altered inheritance of mitochondria protein 6	AIM6		1	1	1	1	1	0	1	0	1	1	1	1	1	1	1	1	0	0	0	1	1	1	1	1	1	1	1	1	1	0	1	1	1	0	1	1	0	1	0	1	1	1
Q07807	Q07807	7	7	7	mRNA-binding protein PUF3	PUF3		1	7	7	7	5	6	6	5	3	5	4	4	5	5	3	3	4	2	1	5	5	2	3	3	4	4	3	4	3	5	5	2	5	2	4	5	6	6	5	3	5	4
Q07825	Q07825	3	3	3	Putative Xaa-Pro aminopeptidase FRA1	FRA1		1	3	3	3	2	2	2	1	2	2	2	1	2	2	1	0	1	1	0	2	2	2	1	1	2	2	2	2	1	1	2	2	2	0	1	2	2	2	1	2	2	2
Q07830	Q07830	1	1	1	GPI ethanolamine phosphate transferase 3	GPI13		1	1	1	1	0	0	0	0	0	0	0	0	0	1	0	0	0	0	0	0	0	0	0	0	0	0	0	0	0	0	0	0	0	0	0	0	0	0	0	0	0	0
Q07938	Q07938	4	4	4	S-methyl-5-thioadenosine phosphorylase	MEU1		1	4	4	4	2	3	2	2	2	3	3	3	2	3	2	1	0	0	0	1	2	2	2	0	0	2	3	3	0	1	2	1	2	0	0	2	3	2	2	2	3	3
Q07979	Q07979	5	5	5	Chromatin structure-remodeling complex protein RSC58	RSC58		1	5	5	5	3	2	3	4	4	3	3	3	4	3	4	4	3	4	3	4	3	3	4	3	4	2	3	3	2	3	3	3	4	1	3	3	2	3	4	4	3	3
Q08001	Q08001	1	1	1	Uncharacterized protein YLR072W	YLR072W		1	1	1	1	0	0	1	1	0	0	0	1	0	0	0	0	0	0	0	0	0	0	1	0	0	0	0	1	0	0	0	0	0	0	0	0	0	1	1	0	0	0
Q08179	Q08179	1	1	1	Mitochondrial distribution and morphology protein 38	MDM38		1	1	1	1	1	1	1	1	0	0	0	0	1	0	0	0	1	0	0	0	0	0	1	0	0	0	0	0	0	0	0	0	0	0	0	1	1	1	1	0	0	0
Q08204	Q08204	4	4	4	Structural maintenance of chromosomes protein 5	SMC5		1	4	4	4	1	1	1	1	0	1	1	1	1	1	1	1	1	1	3	2	2	1	1	1	1	1	2	1	1	3	2	2	1	1	2	1	1	1	1	0	1	1
Q08208	Q08208	7	7	7	Nucleolar protein 12	NOP12		1	7	7	7	4	2	1	2	0	0	0	0	1	0	0	1	2	5	0	0	1	0	3	0	0	2	1	0	1	0	1	0	2	0	0	4	2	1	2	0	0	0
Q08218	Q08218	2	2	2	Outer spore wall protein LDS2	LDS2		1	2	2	2	0	0	0	0	0	0	0	0	0	0	0	0	0	0	0	0	0	0	0	0	0	0	0	1	0	0	1	0	2	0	1	0	0	0	0	0	0	0
Q08225	Q08225	4	4	4	Probable dipeptidyl peptidase 3			1	4	4	4	1	0	1	1	0	0	0	2	1	0	0	0	1	1	2	2	1	0	0	1	2	2	1	1	1	1	0	1	3	0	1	1	0	1	1	0	0	0
Q08229	Q08229	1	1	1	Protein NBA1	NBA1		1	1	1	1	1	0	1	0	1	0	1	0	1	0	0	0	0	0	0	0	0	0	0	0	0	0	0	0	0	0	0	0	0	0	0	1	0	1	0	1	0	1
Q08245	Q08245	29	29	29	Protein ZEO1	ZEO1		1	29	29	29	22	19	19	22	20	18	16	26	20	18	18	22	14	12	24	17	21	16	25	12	20	17	16	25	15	17	19	19	21	10	13	22	19	19	22	20	18	16
Q08285	Q08285	1	1	1	Exosome complex component RRP40	RRP40		1	1	1	1	1	1	1	1	1	1	1	1	1	1	1	1	1	1	1	1	1	1	1	1	1	1	1	1	1	1	1	1	1	0	1	1	1	1	1	1	1	1
Q08412	Q08412	2	2	2	Ubiquitin-binding protein CUE5	CUE5		1	2	2	2	0	0	0	1	0	0	0	0	0	0	0	1	0	0	1	0	0	0	2	0	0	0	0	0	0	0	0	0	0	0	0	0	0	0	1	0	0	0
Q08465	Q08465	2	2	2	Protein YNG1	YNG1		1	2	2	2	0	1	2	1	1	2	0	1	2	0	0	0	1	1	1	1	0	0	1	0	0	0	0	1	0	0	0	2	0	0	0	0	1	2	1	1	2	0
Q08484	Q08484	3	3	3	GTPase-activating protein GYP1	GYP1		1	3	3	3	1	1	1	0	1	1	1	0	1	1	1	0	1	2	1	1	0	0	1	0	0	0	0	0	0	0	0	1	0	1	0	1	1	1	0	1	1	1
Q08490	Q08490	1	1	1	Shugoshin	SGO1		1	1	1	1	0	0	0	0	0	0	0	1	0	0	0	0	0	0	1	1	0	1	1	0	1	0	0	1	0	1	1	1	0	0	0	0	0	0	0	0	0	0
Q08561	Q08561	8	8	8	Ino eighty subunit 4	IES4		1	8	8	8	2	3	4	1	2	3	3	2	3	3	4	2	2	4	5	3	2	2	2	2	2	3	2	1	2	3	2	2	3	0	2	2	3	4	1	2	3	3
Q08562	Q08562	6	6	5	ATP-dependent helicase ULS1	ULS1		1	6	6	5	0	1	0	0	0	0	0	1	0	0	1	1	0	4	4	1	1	0	1	1	0	1	0	0	1	1	0	1	1	0	0	0	1	0	0	0	0	0
Q08581	Q08581	2	2	2	Kinetochore protein SLK19	SLK19		1	2	2	2	0	0	0	0	0	0	0	0	0	0	0	0	0	2	0	0	0	0	1	0	0	0	0	0	0	1	0	1	0	0	0	0	0	0	0	0	0	0
Q08689	Q08689	1	1	1	N-terminal acetyltransferase A complex subunit NAT5	NAT5		1	1	1	1	0	0	0	0	1	1	1	0	1	1	0	0	1	1	0	1	1	0	0	1	1	0	1	0	1	1	0	1	1	0	1	0	0	0	0	1	1	1
Q08692	Q08692	2	2	2	Outer spore wall protein 1	OSW1		1	2	2	2	0	0	0	0	0	0	0	0	0	0	0	0	0	0	0	0	0	0	0	0	0	0	0	0	0	0	1	1	2	0	0	0	0	0	0	0	0	0
Q08702	Q08702	6	6	6	Aprataxin-like protein	HNT3		1	6	6	6	1	2	3	3	2	2	3	4	1	2	2	4	2	1	0	2	2	2	5	2	1	2	1	4	3	1	2	2	3	1	1	1	2	3	3	2	2	3
Q08732	Q08732	33	33	33	Serine/threonine-protein kinase HRK1	HRK1		1	33	33	33	18	20	23	19	12	15	18	10	12	12	14	7	10	13	14	13	17	12	10	7	13	11	14	14	5	13	16	14	11	5	6	18	20	23	19	12	15	18
Q08745	Q08745	10	2	2	40S ribosomal protein S10-A	RPS10A		1	10	2	2	6	6	5	6	6	5	6	7	5	4	6	7	3	6	7	6	6	5	7	2	6	5	6	5	3	5	4	4	7	2	2	0	1	0	0	1	0	1
Q08747	Q08747	8	8	8	Upstream activation factor subunit UAF30	UAF30		1	8	8	8	3	3	5	4	3	2	3	2	3	4	2	5	2	1	6	3	2	1	1	1	2	4	3	1	0	3	3	3	2	0	0	3	3	5	4	3	2	3
Q08816	Q08816	1	1	1	Uncharacterized protein YOR352W	YOR352W		1	1	1	1	0	1	1	0	1	1	1	0	1	1	1	0	1	0	0	0	0	0	1	1	1	0	0	0	1	0	0	0	1	0	1	0	1	1	0	1	1	1
Q08831	Q08831	6	6	6	Protein VTS1	VTS1		1	6	6	6	3	2	1	2	2	2	2	2	1	2	2	0	2	4	3	1	1	1	1	1	1	2	1	1	2	1	1	1	0	0	1	3	2	1	2	2	2	2
Q08923	Q08923	1	1	1	Histone deacetylase complex subunit CTI6	CTI6		1	1	1	1	1	0	1	0	0	0	0	0	0	0	0	0	0	0	1	0	0	0	1	0	0	0	0	0	0	0	0	0	0	0	0	1	0	1	0	0	0	0
Q08949	Q08949	1	1	1	DNA damage checkpoint protein 1	DDC1		1	1	1	1	0	0	0	0	0	0	0	0	1	1	1	1	1	1	1	1	1	0	1	1	1	1	1	0	0	1	1	1	0	1	1	0	0	0	0	0	0	0
Q08951	Q08951	2	2	2	AP-3 complex subunit delta	APL5		1	2	2	2	0	0	0	1	0	0	0	0	1	0	0	0	0	1	1	0	0	0	0	1	1	0	0	0	0	0	1	1	0	0	0	0	0	0	1	0	0	0
Q08957	Q08957	3	3	3	Iron-regulated transcriptional activator AFT2	AFT2		1	3	3	3	3	2	2	2	3	3	2	2	3	3	2	2	0	0	2	2	2	2	2	1	2	2	1	1	0	2	2	2	1	0	1	3	2	2	2	3	3	2
Q08962	Q08962	1	1	1	60S ribosome subunit biogenesis protein NIP7	NIP7		1	1	1	1	0	0	0	0	1	1	1	0	1	1	1	0	0	1	0	0	1	1	0	0	1	0	0	0	0	0	1	1	0	0	0	0	0	0	0	1	1	1
Q08970	Q08970	4	4	4	Mitochondrial metal transporter 2	MMT2		1	4	4	4	3	2	4	1	1	3	2	1	2	1	1	1	0	1	0	0	0	0	1	0	0	0	0	0	0	0	0	1	1	0	0	3	2	4	1	1	3	2
Q08971	Q08971	1	1	1	Protein PBDC1 homolog	YPL225W		1	1	1	1	0	0	0	0	0	0	0	1	0	0	0	0	0	0	0	0	0	0	1	0	0	0	0	1	0	0	0	0	0	0	0	0	0	0	0	0	0	0
Q08977	Q08977	2	2	2	UPF0662 protein YPL260W	YPL260W		1	2	2	2	0	0	0	0	0	0	0	1	0	0	0	0	1	0	0	0	0	0	0	0	1	0	0	0	1	0	0	0	0	0	1	0	0	0	0	0	0	0
Q12012	Q12012	2	2	2	Uncharacterized protein YOR289W	YOR289W		1	2	2	2	0	0	0	0	2	2	2	0	2	2	1	0	0	1	0	1	2	1	0	1	1	2	1	0	1	2	2	1	0	1	1	0	0	0	0	2	2	2
Q12020	Q12020	1	1	1	Protein SRL2	SRL2		1	1	1	1	1	1	0	0	1	0	0	0	1	1	0	0	0	1	0	0	0	0	1	0	0	0	0	0	0	1	0	1	0	0	0	1	1	0	0	1	0	0
Q12040	Q12040	2	2	2	Broad-specificity phosphatase YOR283W	YOR283W		1	2	2	2	0	0	0	0	2	1	2	0	2	2	1	0	0	0	0	1	0	1	0	0	1	0	0	0	0	0	0	0	0	0	1	0	0	0	0	2	1	2
Q12044	Q12044	1	1	1	Regulator of calcineurin 2	RCN2		1	1	1	1	0	0	0	0	0	0	0	1	0	0	0	1	0	1	1	0	0	0	1	0	0	0	0	1	0	0	0	0	1	0	0	0	0	0	0	0	0	0
Q12050	Q12050	2	2	2	Telomere length regulation protein ELG1	ELG1		1	2	2	2	0	0	0	0	0	0	0	0	0	0	0	0	0	2	0	0	0	0	0	0	0	0	0	0	0	0	0	0	0	0	0	0	0	0	0	0	0	0
Q12056	Q12056	1	1	1	Iron sulfur cluster assembly protein 2, mitochondrial	ISU2		1	1	1	1	1	1	1	1	1	1	1	1	1	1	1	1	1	1	0	1	1	1	1	0	1	1	1	0	0	1	1	1	1	0	0	1	1	1	1	1	1	1
Q12063	Q12063	1	1	1	Dehydrodolichyl diphosphate syntase complex subunit NUS1	NUS1		1	1	1	1	0	0	1	1	0	0	1	1	0	0	0	0	0	0	0	1	1	1	1	0	1	1	1	1	0	1	1	1	1	0	0	0	0	1	1	0	0	1
Q12080	Q12080	4	4	4	Ribosome biogenesis protein NOP53	NOP53		1	4	4	4	0	0	0	0	0	0	0	0	0	0	0	0	0	4	0	0	0	0	1	0	0	0	0	0	0	0	0	0	0	0	0	0	0	0	0	0	0	0
Q12098	Q12098	2	2	2	Structure-specific endonuclease subunit SLX4	SLX4		1	2	2	2	0	0	0	0	0	0	0	0	0	0	0	0	0	2	1	0	0	0	0	0	0	0	0	0	0	0	0	0	0	0	0	0	0	0	0	0	0	0
Q12100	Q12100	17	17	17	Probable serine/threonine-protein kinase RTK1	RTK1		1	17	17	17	6	8	10	10	4	5	5	2	4	8	3	2	7	8	9	4	5	4	4	4	4	3	3	5	3	6	4	4	4	1	2	6	8	10	10	4	5	5
Q12123	Q12123	19	19	18	Inactive diphosphatase DCS2	DCS2		1	19	19	18	8	9	15	11	13	9	14	9	10	12	12	10	10	4	2	11	10	11	8	8	10	10	11	9	7	10	11	9	10	7	8	8	9	15	11	13	9	14
Q12128	Q12128	10	10	10	Rho-GTPase-activating protein BAG7	BAG7		1	10	10	10	3	1	2	2	1	2	3	2	1	1	5	2	1	6	3	1	1	1	1	2	0	1	1	1	0	1	2	1	0	0	1	3	1	2	2	1	2	3
Q12132	Q12132	3	3	3	Nutrient and stress factor 1	USV1		1	3	3	3	0	0	0	0	0	0	0	0	0	0	0	0	0	2	2	0	0	0	0	0	0	0	0	0	0	0	1	0	1	0	1	0	0	0	0	0	0	0
Q12134	Q12134	2	2	2	Protein HUA2	HUA2		1	2	2	2	0	1	0	1	0	0	0	1	0	0	0	1	2	0	1	0	0	0	1	0	0	0	0	0	0	0	0	0	1	0	0	0	1	0	1	0	0	0
Q12139	Q12139	1	1	1	Zinc finger protein YPR022C	YPR022C		1	1	1	1	1	0	1	0	0	0	0	0	1	0	1	0	0	1	1	1	0	0	0	1	1	0	1	0	0	1	0	1	0	0	1	1	0	1	0	0	0	0
Q12156	Q12156	2	2	2	Protein AIM7	AIM7		1	2	2	2	0	0	0	0	0	0	0	0	0	0	0	1	0	1	1	0	0	0	1	0	0	0	0	1	0	0	0	0	0	0	0	0	0	0	0	0	0	0
Q12157	Q12157	1	1	1	Anaphase-promoting complex subunit 11	APC11		1	1	1	1	1	1	1	1	1	1	1	1	1	1	1	1	1	1	1	1	1	1	1	1	1	1	1	1	1	1	1	1	1	1	1	1	1	1	1	1	1	1
Q12159	Q12159	5	5	5	RNA annealing protein YRA1	YRA1		1	5	5	5	1	2	1	2	2	1	1	2	2	0	0	1	1	3	3	2	1	0	3	0	1	1	2	1	1	2	2	1	2	0	0	1	2	1	2	2	1	1
Q12166	Q12166	1	1	1	2-isopropylmalate synthase 2, mitochondrial	LEU9		1	1	1	1	0	0	0	0	1	1	1	0	1	1	0	0	0	0	0	0	0	0	0	0	1	0	0	0	0	0	1	0	0	0	0	0	0	0	0	1	1	1
Q12175	Q12175	4	4	4	MutS protein homolog 5	MSH5		1	4	4	4	0	0	0	0	0	0	0	0	0	0	0	0	0	0	0	3	1	1	1	0	1	1	2	2	0	2	2	1	0	0	0	0	0	0	0	0	0	0
Q12184	Q12184	1	1	1	Adrenodoxin homolog, mitochondrial	YAH1		1	1	1	1	0	1	1	1	1	1	0	1	0	0	0	1	1	0	0	1	1	0	1	0	0	0	0	1	0	1	0	0	1	0	0	0	1	1	1	1	1	0
Q12188	Q12188	20	20	20	Meiotic recombination protein REC8	REC8		1	20	20	20	0	0	0	0	8	9	7	7	8	8	5	8	9	13	11	13	10	8	9	7	6	8	9	8	1	10	7	9	7	2	4	0	0	0	0	8	9	7
Q12202	Q12202	1	1	1	Outer spore wall protein 2	OSW2		1	1	1	1	0	0	0	0	0	0	0	0	0	0	0	0	0	0	0	0	1	0	0	0	0	0	0	1	0	0	1	1	1	1	1	0	0	0	0	0	0	0
Q12207	Q12207	1	1	1	Non-classical export protein 2	NCE102		1	1	1	1	0	0	0	0	0	0	0	0	0	0	0	0	0	1	0	0	0	0	0	0	0	0	0	0	0	0	0	0	0	0	0	0	0	0	0	0	0	0
Q12213	Q12213	13	1	1	60S ribosomal protein L7-B	RPL7B		1	13	1	1	2	3	5	4	3	2	3	5	2	3	3	4	1	8	4	2	3	2	7	4	4	2	2	5	2	3	3	3	3	0	2	0	0	0	0	0	0	0
Q12216	Q12216	6	6	6	E3 SUMO-protein ligase SIZ2	NFI1		1	6	6	6	1	2	1	2	3	3	1	3	1	2	3	3	2	2	2	3	2	2	5	0	2	3	2	2	0	3	3	2	3	0	0	1	2	1	2	3	3	1
Q12223	Q12223	9	9	9	DNA repair protein RAD59	RAD59		1	9	9	9	0	0	0	0	1	1	0	1	4	3	3	3	3	3	0	8	5	6	7	3	5	7	7	6	3	8	6	8	4	3	4	0	0	0	0	1	1	0
Q12230	Q12230	4	4	4	Sphingolipid long chain base-responsive protein LSP1	LSP1		1	4	4	4	2	1	2	3	2	1	1	0	2	1	2	1	0	0	3	2	2	1	3	1	2	1	2	2	2	2	2	2	2	0	0	2	1	2	3	2	1	1
Q12233	Q12233	1	1	1	ATP synthase subunit g, mitochondrial	ATP20		1	1	1	1	1	1	0	0	1	1	1	1	1	1	1	1	1	1	0	1	1	1	0	1	1	1	1	1	1	1	1	1	1	0	1	1	1	0	0	1	1	1
Q12234	Q12234	1	1	1	GRIP domain-containing protein RUD3	RUD3		1	1	1	1	0	0	0	0	0	0	0	0	0	0	0	0	0	1	0	0	0	0	0	0	0	0	0	0	0	0	0	0	0	0	0	0	0	0	0	0	0	0
Q12244	Q12244	1	1	1	Uncharacterized transcriptional regulatory protein YLL054C			1	1	1	1	1	1	1	1	1	1	1	1	1	1	1	1	1	1	1	1	1	1	1	0	1	1	1	1	0	1	1	1	1	0	0	1	1	1	1	1	1	1
Q12247	Q12247	1	1	1	rRNA-processing protein FYV7	FYV7		1	1	1	1	1	1	1	0	1	1	1	0	1	1	1	0	0	0	1	1	1	1	0	0	1	0	0	0	0	1	1	1	0	0	0	1	1	1	0	1	1	1
Q12250	Q12250	6	6	6	26S proteasome regulatory subunit RPN5	RPN5		1	6	6	6	0	1	1	2	0	0	0	2	2	0	0	2	3	2	4	2	0	1	3	2	2	2	2	2	1	2	2	2	2	0	1	0	1	1	2	0	0	0
Q12267	Q12267	15	15	15	Structural maintenance of chromosomes protein 4	SMC4		1	15	15	15	5	5	3	2	5	3	2	2	7	6	1	3	4	10	7	6	7	4	3	4	6	7	7	4	4	6	6	6	4	2	4	5	5	3	2	5	3	2
Q12272	Q12272	3	3	3	tRNA 2-phosphotransferase	TPT1		1	3	3	3	2	2	2	3	2	2	2	3	2	2	2	3	2	1	0	2	2	2	2	2	2	2	2	3	1	2	2	2	2	1	2	2	2	2	3	2	2	2
Q12283	Q12283	1	1	1	Malonyl CoA-acyl carrier protein transacylase, mitochondrial	MCT1		1	1	1	1	0	0	0	0	0	1	1	0	0	1	0	0	0	0	0	0	0	1	0	0	0	1	1	0	0	0	0	0	0	0	1	0	0	0	0	0	1	1
Q12289	Q12289	2	2	2	Mitochondrial carnitine carrier	CRC1		1	2	2	2	0	0	0	0	0	0	1	0	1	0	1	0	0	0	0	0	0	1	0	0	2	1	0	0	0	0	0	2	0	0	0	0	0	0	0	0	0	1
Q12296	Q12296	2	2	2	Protein MAM3	MAM3		1	2	2	2	0	2	1	1	0	1	0	1	0	0	0	1	1	1	0	1	1	0	1	0	2	1	2	1	1	2	1	0	1	0	0	0	2	1	1	0	1	0
Q12305	Q12305	3	3	3	Thiosulfate sulfurtransferase RDL1, mitochondrial	RDL1		1	3	3	3	0	0	0	0	0	0	1	1	0	0	1	1	0	1	0	0	0	0	1	0	0	0	0	1	0	0	0	0	0	0	0	0	0	0	0	0	0	1
Q12306;REV__Q12092	Q12306	29;1	29;1	28;1	Ubiquitin-like protein SMT3	SMT3		2	29	29	28	21	22	25	22	22	22	22	24	22	22	22	21	10	9	18	22	23	23	22	10	22	22	24	23	10	21	24	22	22	5	10	21	22	25	22	22	22	22
718;277719;277720;277721;277722;277723;277724;277725;277726;277727;277728;277729;277730;277731;277732;277733;277734;277735;277736;277737;277738;277739;277740;277741;277742;277743;277744;277745;277746;277747;277748;277749;277750;277751;277752;277753;277754;277755;277756;277757;277758;277759;277760;277761;277762;277763;277764;277765;277766;277767;277768;277769;277770;277771;277772;277773;277774;277…
2398;282399;282400;282401;282402;282403;282404;282405;282406;282407;282408;282409;282410;282411;282412;282413;282414;282415;282416;282417;282418;282419;282420;282421;282422;282423;282424;282425;282426;282427;282428;282429;282430;282431;282432;282433;282434;282435;282436;282437;282438;282439;282440;282441;282442;282443;282444;282445;282446;282447;282448;282449;282450;282451;282452;282453;282454;28…
40366;340367;340368;340369;340370;340371;340372;340373;340374;340375;340376;340377;340378;340379;340380;340381;340382;340383;340384;340385;340386;340387;340388;340389;340390;340391;340392;340393;340394;340395;340396;340397;340398;340399;340400;340401;340402;340403;340404;340405;340406;340407;340408;340409;340410;340411;340412;340413;340414;340415;340416;340417;340418;340419;340420;340421;340422;3…	3487;12733;14488;50042;50048;50052;183252;183634;183766;221184;262648;276196;276345;277853;282335;285672;321088;321390;339600;341069;341876;366344;366759;375994;376093;376221;380528;380848;380879	2327;2328;2329;2330;2331;2332;2333;2334;2335	440;441;442	174;175	11;15;19;27;38;40;41;54;58	49;60;83	2;4
Q12311	Q12311	1	1	1	NuA3 HAT complex component NTO1	NTO1		1	1	1	1	0	0	1	0	0	0	0	0	0	0	0	0	1	0	0	0	0	0	0	0	0	0	0	0	0	0	0	0	0	0	0	0	0	1	0	0	0	0
Q12314	Q12314	1	1	1	Protein arginine N-methyltransferase SFM1	SFM1		1	1	1	1	0	0	0	0	1	1	1	1	1	1	1	1	1	0	0	1	1	0	0	1	1	1	1	1	1	1	1	1	0	0	1	0	0	0	0	1	1	1
Q12320	Q12320	3	3	3	Hydroxyacylglutathione hydrolase, mitochondrial	GLO4		1	3	3	3	0	0	1	1	0	0	0	1	0	0	0	1	0	0	0	1	1	0	1	0	0	0	0	2	0	1	0	0	2	1	0	0	0	1	1	0	0	0
Q12321	Q12321	1	1	1	Mediator of RNA polymerase II transcription subunit 1	MED1		1	1	1	1	0	0	0	0	0	0	0	0	0	0	0	0	0	0	1	0	0	0	0	0	0	0	0	0	0	0	0	0	0	0	0	0	0	0	0	0	0	0
Q12329	Q12329	20	20	20	Heat shock protein 42	HSP42		1	20	20	20	6	7	11	9	8	8	14	12	7	8	10	7	5	1	4	7	9	10	9	2	8	10	8	13	4	11	15	15	12	3	4	6	7	11	9	8	8	14
Q12335	Q12335	5	5	5	Protoplast secreted protein 2	PST2		1	5	5	5	0	0	1	0	1	1	3	2	3	2	2	2	0	2	0	0	2	2	1	1	2	2	2	3	1	2	2	2	1	0	1	0	0	1	0	1	1	3
Q12354	Q12354	3	3	3	Acyl-protein thioesterase 1			1	3	3	3	2	2	2	1	2	2	2	1	2	2	1	1	1	1	2	1	1	2	2	1	1	1	1	2	2	1	2	1	2	0	1	2	2	2	1	2	2	2
Q12363	Q12363	1	1	1	Transcriptional modulator WTM1	WTM1		1	1	1	1	0	0	0	0	1	0	0	1	1	0	1	1	0	1	1	0	0	0	1	0	1	0	0	1	0	1	0	1	1	1	0	0	0	0	0	1	0	0
Q12366	Q12366	2	2	2	Non-disjunction protein 1	NDJ1		1	2	2	2	0	0	0	0	2	2	1	1	1	2	1	1	1	1	1	2	2	2	1	1	1	1	2	1	1	2	2	2	1	1	1	0	0	0	0	2	2	1
Q12393	Q12393	7	7	7	Genetic interactor of prohibitin 5, mitochondrial	GEP5		1	7	7	7	4	3	6	5	2	3	4	4	4	3	4	3	2	3	1	2	3	3	4	1	2	2	2	4	0	2	1	3	2	0	0	4	3	6	5	2	3	4
Q12398	Q12398	1	1	1	Probable transcription factor HMS1	HMS1		1	1	1	1	0	0	0	1	0	0	0	0	0	0	0	0	0	1	1	1	0	0	1	0	1	1	0	1	1	1	1	1	1	1	1	0	0	0	1	0	0	0
Q12405	Q12405	2	2	2	Peroxisomal membrane protein LPX1	LPX1		1	2	2	2	0	1	1	1	0	1	1	1	0	0	0	1	0	0	0	0	1	0	1	0	0	0	0	1	0	0	1	0	2	1	0	0	1	1	1	0	1	1
Q12406	Q12406	1	1	1	Actin-related protein 7	ARP7		1	1	1	1	0	0	0	0	0	0	0	0	0	0	0	0	0	1	0	0	0	0	0	0	0	0	0	0	0	0	0	0	0	0	0	0	0	0	0	0	0	0
Q12417	Q12417	2	2	2	Pre-mRNA-splicing factor PRP46	PRP46		1	2	2	2	0	0	0	0	0	0	0	0	0	0	0	0	0	1	0	0	0	0	0	0	0	1	0	0	0	0	0	0	0	0	0	0	0	0	0	0	0	0
Q12427	Q12427	12	12	12	Protein STB3	STB3		1	12	12	12	6	5	3	4	5	4	6	5	7	6	7	4	3	6	5	6	5	7	6	1	9	8	5	6	3	8	7	8	6	1	6	6	5	3	4	5	4	6
Q12428	Q12428	3	3	3	Probable 2-methylcitrate dehydratase	PDH1		1	3	3	3	0	0	0	0	0	0	1	0	0	1	1	0	0	1	0	0	0	1	1	0	1	1	0	0	1	1	2	1	0	0	2	0	0	0	0	0	0	1
Q12429	Q12429	3	3	3	Diphthine--ammonia ligase	DPH6		1	3	3	3	0	0	0	1	0	0	1	0	0	0	0	0	0	0	0	0	0	0	0	0	1	0	0	0	0	0	0	0	0	0	0	0	0	0	1	0	0	1
Q12433	Q12433	8	8	8	Protein AHC1	AHC1		1	8	8	8	4	5	4	4	5	4	4	4	4	4	4	4	3	4	2	5	4	4	4	4	5	5	5	4	2	4	5	5	5	3	4	4	5	4	4	5	4	4
Q12447	Q12447	5	5	5	Polyamine N-acetyltransferase 1	PAA1		1	5	5	5	2	2	2	4	1	2	2	3	1	1	0	3	1	1	4	3	2	0	3	1	1	1	2	3	2	2	3	2	1	0	0	2	2	2	4	1	2	2
Q12449	Q12449	3	3	3	Hsp90 co-chaperone AHA1	AHA1		1	3	3	3	1	0	2	0	1	0	0	2	0	0	0	3	1	1	2	1	1	0	3	1	0	0	1	3	0	1	2	0	1	0	0	1	0	2	0	1	0	0
Q12457	Q12457	9	9	9	RNA polymerase I termination factor	NSI1		1	9	9	9	3	3	3	3	2	2	2	0	2	1	0	2	4	7	3	3	2	1	3	1	1	1	3	1	0	2	2	1	1	0	0	3	3	3	3	2	2	2
Q12458	Q12458	1	1	1	Putative reductase 1	YPR1		1	1	1	1	0	0	0	0	0	0	0	0	0	0	0	0	0	1	0	0	0	0	0	0	0	0	0	0	0	0	0	0	0	0	0	0	0	0	0	0	0	0
Q12460	Q12460	6	6	6	Nucleolar protein 56	NOP56		1	6	6	6	3	3	3	4	2	2	1	2	2	1	1	4	1	3	2	2	2	0	3	2	1	2	0	3	1	2	2	2	3	0	1	3	3	3	4	2	2	1
Q12461	Q12461	2	2	2	Serine/threonine-protein phosphatase 2A activator 2	RRD2		1	2	2	2	1	0	0	0	0	0	0	0	0	1	1	0	0	0	0	0	1	0	0	0	0	0	0	0	0	0	0	0	0	0	0	1	0	0	0	0	0	0
Q12464	Q12464	1	1	1	RuvB-like protein 2	RVB2		1	1	1	1	1	0	0	1	1	1	1	1	1	1	1	1	1	1	1	0	1	1	1	1	1	0	1	1	0	1	1	1	0	0	1	1	0	0	1	1	1	1
Q12480	Q12480	1	1	1	Probable electron transfer flavoprotein subunit alpha, mitochondrial	AIM45		1	1	1	1	0	0	0	0	0	0	0	0	0	0	0	0	0	1	0	0	0	0	0	0	0	0	0	0	0	0	0	0	0	0	0	0	0	0	0	0	0	0
Q12488	Q12488	1	1	1	DNA replication complex GINS protein PSF1	PSF1		1	1	1	1	0	0	0	0	0	0	0	0	0	0	0	0	0	1	0	0	0	0	0	0	0	0	0	0	0	0	0	0	0	0	0	0	0	0	0	0	0	0
Q12493	Q12493	1	1	1	Central kinetochore subunit NKP1	NKP1		1	1	1	1	1	1	1	1	0	0	0	0	0	0	0	0	0	0	0	0	0	0	0	0	0	0	0	0	0	0	0	0	0	0	0	1	1	1	1	0	0	0
Q12494	Q12494	6	6	6	Inositol hexakisphosphate kinase 1	KCS1		1	6	6	6	2	2	2	0	1	1	2	2	1	1	1	2	2	1	0	2	2	1	2	1	2	2	2	3	1	2	2	2	2	1	1	2	2	2	0	1	1	2
Q12499	Q12499	3	3	3	Nucleolar protein 58	NOP58		1	3	3	3	1	1	1	1	0	0	0	0	0	0	0	0	0	2	1	0	0	0	0	0	0	0	0	0	0	0	0	0	0	0	0	1	1	1	1	0	0	0
Q12510	Q12510	6	6	6	DNA damage-binding protein CMR1	CMR1		1	6	6	6	3	3	3	4	4	5	4	4	5	4	5	4	2	4	4	4	4	5	5	3	5	3	4	5	3	5	4	4	4	0	2	3	3	3	4	4	5	4
Q12512	Q12512	1	1	1	Protein ZPS1	ZPS1		1	1	1	1	0	0	0	0	0	0	0	1	0	0	0	0	0	0	0	0	0	0	0	0	0	0	0	1	0	0	0	0	0	0	0	0	0	0	0	0	0	0
Q12513	Q12513	2	2	2	Translation machinery-associated protein 17	TMA17		1	2	2	2	1	2	1	1	1	1	1	1	1	1	1	2	0	0	1	1	1	1	2	0	1	1	2	1	0	1	1	1	2	0	0	1	2	1	1	1	1	1
Q12672	Q12672	18	1	1	60S ribosomal protein L21-B	RPL21B		1	18	1	1	9	7	8	9	11	10	12	11	10	9	10	8	7	13	11	12	8	12	8	9	11	9	9	9	9	8	10	7	7	1	8	1	1	1	1	1	1	1
Q12680	Q12680	3	3	3	Glutamate synthase [NADH]	GLT1		1	3	3	3	0	0	0	1	0	0	0	1	0	0	0	1	1	1	0	0	0	0	1	0	0	0	0	1	0	0	0	0	0	0	0	0	0	0	1	0	0	0
Q12692	Q12692	3	3	3	Histone H2A.Z	HTZ1		1	3	3	3	1	0	1	1	1	1	1	1	1	1	1	1	1	2	2	1	1	1	1	1	1	1	1	1	1	1	1	1	1	1	1	1	0	1	1	1	1	1
Q12749	Q12749	5	5	5	Structural maintenance of chromosomes protein 6	SMC6		1	5	5	5	0	0	0	0	1	2	0	2	0	1	0	2	2	2	1	4	0	1	2	2	2	3	4	3	1	4	3	3	2	0	2	0	0	0	0	1	2	0
Q3E705	Q3E705	1	1	1	rRNA-processing protein EFG1	EFG1		1	1	1	1	0	0	0	0	0	0	0	0	0	0	0	0	1	0	0	0	0	0	0	0	0	0	0	0	0	0	0	0	0	0	0	0	0	0	0	0	0	0
Q3E757;P0C0W9	Q3E757;P0C0W9	9;8	9;8	9;8	60S ribosomal protein L11-B;60S ribosomal protein L11-A	RPL11B;RPL11A	;	2	9	9	9	5	4	4	4	5	5	6	4	5	5	5	0	4	4	4	5	4	5	4	4	5	5	4	4	5	4	5	5	5	0	5	5	4	4	4	5	5	6
Q3E764	Q3E764	3	3	3	Translation machinery-associated protein 7	TMA7		1	3	3	3	0	0	2	1	0	0	0	2	0	0	0	1	0	0	2	0	0	0	2	0	0	0	0	1	0	0	0	0	0	0	0	0	0	2	1	0	0	0
Q3E792	Q3E792	9	9	1	40S ribosomal protein S25-A	RPS25A		1	9	9	1	5	5	4	6	6	6	5	5	6	5	5	4	5	6	6	5	4	7	6	4	6	2	6	4	7	4	6	3	5	1	3	5	5	4	6	6	6	5
Q3E7X9	Q3E7X9	2	1	1	40S ribosomal protein S28-A	RPS28A		1	2	1	1	1	1	1	1	1	1	1	1	1	1	1	1	1	1	2	1	1	1	1	1	1	1	1	1	1	1	1	1	1	0	1	1	1	1	1	1	1	1
Q3E7Y3;P0C0W1	Q3E7Y3;P0C0W1	10;9	10;9	10;9	40S ribosomal protein S22-B;40S ribosomal protein S22-A	RPS22B;RPS22A	;	2	10	10	10	1	0	1	0	1	0	5	0	2	3	6	1	1	7	2	1	1	3	1	1	4	3	1	1	3	1	3	4	0	0	2	1	0	1	0	1	0	5
Q3E7Y6	Q3E7Y6	1	1	1	N-terminal-borealin-like protein	NBL1		1	1	1	1	1	1	1	1	0	0	0	1	0	0	0	0	0	0	1	0	0	0	0	0	0	0	0	0	0	0	0	0	0	0	0	1	1	1	1	0	0	0
Q3E833	Q3E833	1	1	1	EKC/KEOPS complex subunit PCC1	PCC1		1	1	1	1	0	0	1	1	1	0	0	1	1	0	0	1	0	0	0	1	0	0	1	0	0	1	1	1	0	0	0	1	1	0	0	0	0	1	1	1	0	0
Q3E835	Q3E835	1	1	1	MHF histone-fold complex subunit 1	MHF1		1	1	1	1	0	0	0	0	0	0	0	1	1	0	0	1	0	0	0	0	0	0	1	0	0	0	1	0	0	1	0	0	1	0	0	0	0	0	0	0	0	0
Q3E841	Q3E841	3	3	3	Uncharacterized protein YNR034W-A	YNR034W-A		1	3	3	3	0	0	1	1	0	0	0	2	0	0	0	1	0	2	1	0	0	0	2	0	0	0	0	0	0	0	0	0	0	0	0	0	0	1	1	0	0	0
Q92317	Q92317	1	1	1	Negative cofactor 2 complex subunit beta	NCB2		1	1	1	1	1	1	1	1	1	1	1	1	1	1	1	1	0	0	1	1	1	1	1	0	1	1	1	1	0	1	1	1	1	0	0	1	1	1	1	1	1	1
Q99190	Q99190	3	3	3	Very-long-chain enoyl-CoA reductase	TSC13		1	3	3	3	0	0	0	1	0	1	0	2	1	1	0	0	1	2	0	1	0	0	1	0	1	1	1	0	0	1	0	0	1	0	0	0	0	0	1	0	1	0
Q99216	Q99216	1	1	1	Pre-rRNA-processing protein PNO1	PNO1		1	1	1	1	0	0	0	1	0	0	0	0	0	0	0	0	0	0	1	0	0	0	1	0	0	0	0	0	0	0	0	0	1	0	0	0	0	0	1	0	0	0
Q99247	Q99247	10	10	10	Uncharacterized WD repeat-containing protein YOL087C			1	10	10	10	3	5	7	6	1	3	3	2	2	3	0	4	2	7	3	4	4	1	3	2	1	3	3	6	1	4	5	3	4	0	3	3	5	7	6	1	3	3
Q99288	Q99288	1	1	1	Broad-range acid phosphatase DET1	DET1		1	1	1	1	1	1	1	0	0	1	1	0	0	0	0	0	0	0	0	0	0	1	0	0	0	0	0	0	0	0	0	1	0	0	0	1	1	1	0	0	1	1
Q99383	Q99383	2	2	2	Nuclear polyadenylated RNA-binding protein 4	HRP1		1	2	2	2	0	0	0	0	0	0	0	2	0	0	0	1	0	2	0	0	0	0	2	0	0	0	0	0	0	0	0	0	0	0	0	0	0	0	0	0	0	0
Q9P305	Q9P305	1	1	1	mRNA stability protein IGO2	IGO2		1	1	1	1	0	0	0	0	0	0	0	0	0	0	0	0	0	0	0	0	0	0	1	0	0	0	0	0	0	0	0	0	0	0	0	0	0	0	0	0	0	0
REV__P02992	REV__P02992	1	1	1				1	1	1	1	1	0	0	0	1	1	1	0	1	1	1	0	0	1	0	1	1	1	0	1	1	1	1	0	1	1	1	1	0	0	0	1	0	0	0	1	1	1
REV__P20459	REV__P20459	1	1	1				1	1	1	1	0	0	0	0	0	0	0	0	0	0	0	0	0	0	0	0	0	1	0	0	1	0	1	0	0	1	0	1	0	0	0	0	0	0	0	0	0	0
REV__P32377	REV__P32377	1	1	1				1	1	1	1	0	0	0	0	0	0	0	0	1	0	0	0	0	0	0	0	0	0	0	0	0	0	0	0	0	0	0	0	0	0	0	0	0	0	0	0	0	0
REV__P32389	REV__P32389	1	1	1				1	1	1	1	0	0	0	0	1	1	1	1	1	1	1	1	1	0	0	1	1	1	1	1	1	1	1	1	0	1	1	1	0	0	1	0	0	0	0	1	1	1
REV__P32493	REV__P32493	1	1	1				1	1	1	1	0	1	1	1	1	1	0	0	1	1	1	0	0	0	1	1	1	1	1	0	0	1	1	0	0	0	1	1	1	0	1	0	1	1	1	1	1	0
REV__P32568	REV__P32568	1	1	1				1	1	1	1	0	0	0	0	1	0	0	0	1	1	1	0	0	0	1	0	1	0	1	0	1	1	0	0	0	0	0	0	0	0	0	0	0	0	0	1	0	0
REV__P32603	REV__P32603	1	1	1				1	1	1	1	0	1	0	0	0	0	1	0	0	0	0	0	0	0	0	1	1	0	0	0	0	0	0	0	0	0	0	0	0	0	0	0	1	0	0	0	0	1
REV__P32892	REV__P32892	1	1	1				1	1	1	1	1	1	1	1	1	1	1	1	1	1	1	1	0	0	1	1	1	1	1	0	1	1	1	1	0	1	1	1	1	0	0	1	1	1	1	1	1	1
REV__P34230	REV__P34230	1	1	1				1	1	1	1	0	1	0	1	1	1	0	1	0	1	0	1	0	0	0	0	0	1	1	0	1	1	0	0	0	1	0	1	0	0	1	0	1	0	1	1	1	0
REV__P34756	REV__P34756	1	1	1				1	1	1	1	0	0	0	0	0	0	0	0	0	0	0	0	0	1	0	0	0	0	0	0	0	0	0	0	0	0	0	0	0	0	0	0	0	0	0	0	0	0
REV__P37267	REV__P37267	1	1	1				1	1	1	1	1	0	1	1	1	0	1	0	1	1	1	1	1	0	0	0	1	1	1	1	0	1	0	1	0	0	1	1	0	0	0	1	0	1	1	1	0	1
REV__P38321	REV__P38321	1	1	1				1	1	1	1	1	1	1	0	1	1	0	0	1	0	0	0	0	0	0	1	0	0	0	0	1	1	1	0	0	1	1	1	0	0	0	1	1	1	0	1	1	0
REV__P39967	REV__P39967	1	1	1				1	1	1	1	0	0	0	0	0	0	0	0	0	0	0	0	0	1	0	0	0	0	0	0	0	0	0	0	0	0	0	0	0	0	0	0	0	0	0	0	0	0
REV__P47159	REV__P47159	1	1	1				1	1	1	1	0	0	0	1	0	0	0	0	0	0	0	0	0	0	0	0	0	0	1	0	0	0	0	1	0	0	0	0	0	0	0	0	0	0	1	0	0	0
REV__P50875	REV__P50875	1	1	1				1	1	1	1	0	0	0	0	0	0	0	1	0	0	0	0	0	0	0	0	0	0	1	0	0	0	0	0	0	0	0	0	0	0	0	0	0	0	0	0	0	0
REV__P51534	REV__P51534	2	2	2				1	2	2	2	0	0	0	1	0	0	0	1	0	0	0	1	0	0	1	0	0	0	0	0	0	0	0	1	0	0	0	0	0	0	0	0	0	0	1	0	0	0
REV__P53598	REV__P53598	1	1	1				1	1	1	1	1	0	0	1	1	0	1	1	1	1	0	1	0	0	0	1	0	1	1	1	0	1	1	1	0	1	0	0	1	0	1	1	0	0	1	1	0	1
REV__Q02785	REV__Q02785	1	1	1				1	1	1	1	0	0	0	0	0	0	0	0	0	0	0	0	0	0	0	1	1	1	1	0	1	1	1	0	0	1	1	1	0	0	0	0	0	0	0	0	0	0
REV__Q03263	REV__Q03263	1	1	1				1	1	1	1	0	0	0	0	1	1	1	0	1	1	1	0	1	0	0	1	1	1	1	1	1	1	1	0	1	1	1	1	0	0	0	0	0	0	0	1	1	1
REV__Q04052	REV__Q04052	1	1	1				1	1	1	1	0	0	0	0	0	0	0	0	1	1	0	0	0	0	0	1	0	0	0	0	0	0	0	0	0	0	0	0	0	0	1	0	0	0	0	0	0	0
REV__Q04600	REV__Q04600	1	1	1				1	1	1	1	0	0	0	0	0	0	0	1	0	0	0	0	1	0	1	0	0	0	1	1	0	0	0	1	1	0	0	0	0	0	0	0	0	0	0	0	0	0
REV__Q08984	REV__Q08984	1	1	1				1	1	1	1	0	0	0	0	0	0	1	0	0	0	1	0	0	0	1	0	0	0	0	0	0	0	0	0	0	0	0	0	0	0	0	0	0	0	0	0	0	1
REV__Q12051	REV__Q12051	1	1	1				1	1	1	1	0	0	0	1	0	0	0	0	0	0	0	0	0	0	0	0	0	0	1	0	0	0	0	1	0	0	0	0	0	0	0	0	0	0	1	0	0	0
REV__Q12083	REV__Q12083	1	1	1				1	1	1	1	0	1	0	0	0	0	0	0	0	0	0	0	0	0	0	0	0	0	0	0	0	0	0	1	0	0	1	0	1	0	0	0	1	0	0	0	0	0
REV__Q12089	REV__Q12089	3	3	3				1	3	3	3	0	0	1	1	0	1	0	1	0	1	1	0	0	1	0	0	1	0	0	0	1	0	0	1	0	0	0	0	2	0	0	0	0	1	1	0	1	0
REV__Q12150	REV__Q12150	2	2	2				1	2	2	2	1	0	1	0	1	1	0	2	1	1	1	1	0	0	1	1	1	1	2	1	1	0	1	1	1	1	1	1	0	0	1	1	0	1	0	1	1	0
REV__Q12306	REV__Q12306	2	1	1				1	2	1	1	2	2	1	1	2	1	2	2	2	1	2	1	0	0	1	1	2	1	2	0	1	1	2	2	0	2	1	2	1	0	0	1	1	0	0	1	0	1
[truncated: 236 more columns]

## Sheet: GlyGly sites
Proteins	Positions within proteins	Leading proteins	Protein	Protein names	Gene names	Fasta headers	Localization prob	Score diff	PEP	Score	Delta score	Score for localization	Localization prob 0_1	Score diff 0_1	PEP 0_1	Score 0_1	Localization prob 0_2	Score diff 0_2	PEP 0_2	Score 0_2	Localization prob 0_3	Score diff 0_3	PEP 0_3	Score 0_3	Localization prob 0_4	Score diff 0_4	PEP 0_4	Score 0_4	Localization prob 1_1	Score diff 1_1	PEP 1_1	Score 1_1	Localization prob 1_2	Score diff 1_2	PEP 1_2	Score 1_2	Localization prob 1_3	Score diff 1_3	PEP 1_3	Score 1_3	Localization prob 1_4	Score diff 1_4	PEP 1_4	Score 1_4	Localization prob 2_1	Score diff 2_1	PEP 2_1	Score 2_1	Localization prob 2_2
CON__H-INV:HIT000292931;CON__P05787	245;285	CON__H-INV:HIT000292931	CON__H-INV:HIT000292931				0.999998	57.3483	0.00227937	57.348	23.473	57.348																																	0	0		NaN	0.999997
O13297	196	O13297	O13297	mRNA-capping enzyme subunit beta	CET1		0.999311	31.6132	4.12446e-112	238.73	174.47	225.67	0.997043	25.2788	9.30999e-78	213.25	0.998499	28.231	6.04271e-31	179.1	0.998638	28.653	4.12446e-112	238.73	0.927859	11.093	6.49869e-10	127.4	0.935167	11.5909	1.74296e-31	185.29	0.995356	23.3113	4.15017e-40	183.67	0.997088	25.3452	2.97133e-40	198.72	0.98247	17.4855	3.76043e-19	183.67	0.999311	31.6132	4.84873e-94	225.67	0.994112
O13297	197	O13297	O13297	mRNA-capping enzyme subunit beta	CET1		0.828295	6.83401	5.68185e-16	173.32	134.53	91.313	0.5793	1.38931	5.55875e-07	109.24					0	0		NaN	0.586411	1.51633	2.68093e-06	111.65	0	0		NaN	0.583473	1.46377	1.18373e-06	112.13	0	0		NaN	0.571446	1.24969	2.37337e-06	90.653	0.590832	1.59561	1.22912e-06	99.752
O13297	223	O13297	O13297	mRNA-capping enzyme subunit beta	CET1		0.999998	57.4045	0.000161604	73.783	52.738	73.783
O13297	29	O13297	O13297	mRNA-capping enzyme subunit beta	CET1		0.54999	0.871328	3.4128e-06	94.882	84.824	94.882					0	0		NaN	0	0		NaN																	0.519617	0.340963	0.0200426	40.856
O13329	209	O13329	O13329	DNA replication fork-blocking protein FOB1	FOB1		0.999998	56.0512	0.0013835	72.848	72.848	66.056	0.999669	34.8023	0.00687772	47.894	0.999974	45.9045	0.0044518	51.445	0.999998	56.0512	0.0013835	66.056	0.999974	45.858	0.0217126	50.108	0	0		NaN	0	0		NaN	0	0		NaN					0	0		NaN	0
O13329	337	O13329	O13329	DNA replication fork-blocking protein FOB1	FOB1		1	84.17	0.00207631	84.17	46.037	84.17	0.999999	62.3026	0.00565885	62.303	0.999992	51.0919	0.00432951	51.092	0.999999	62.0957	0.0117496	62.303	0.999953	43.2819	0.03452	43.282	0.999997	54.6078	0.012456	54.608	1	68.7347	0.00565885	68.735	0.999941	42.2672	0.0273269	47.198	0.999963	44.3093	0.0110439	44.309	1	64.2973	0.0172928	64.297	0
O13329	399	O13329	O13329	DNA replication fork-blocking protein FOB1	FOB1		0.999966	44.7465	1.062e-10	115.78	96.457	96.544	0.987426	18.9504	2.54699e-08	106.13	0.974032	15.7414	1.40267e-05	85.457	0.917556	10.4647	0.00269877	56.29	0.98809	19.1888	1.062e-10	115.78	0.85044	7.54828	5.83589e-07	94.728	0.841736	7.25795	0.000806473	64.394	0	0		NaN	0.984127	17.924	1.6682e-05	83.729	0.9897	19.8266	0.000575268	67.358	0
O13329	89	O13329	O13329	DNA replication fork-blocking protein FOB1	FOB1		1	69.3488	0.000715843	93.058	73.787	69.349	1	61.3533	0.0518378	61.353	1	93.0578	0.000715843	93.058	1	73.8866	0.0083047	73.887	1	69.3488	0.00387871	69.349	0	0		NaN	0	0		NaN					0	0		NaN					0
O13329	3	O13329	O13329	DNA replication fork-blocking protein FOB1	FOB1		1	113.973	6.52049e-22	114.04	104.32	114.04	1	96.025	7.87426e-13	99.366	1	113.973	6.52049e-22	114.04	1	93.0494	1.06876e-10	93.111	0	0		NaN	1	76.0101	2.65143e-07	76.02	1	102.748	1.33166e-14	105.16	1	69.3986	7.5837e-06	69.548	0	0		NaN	1	96.6776	1.17174e-14	96.679	1
O13329	544	O13329	O13329	DNA replication fork-blocking protein FOB1	FOB1		0.926203	11.0204	1.34145e-16	135.28	118.13	135.28					0	0		NaN	0	0		NaN	0	0		NaN									0	0		NaN	0	0		NaN	0	0		NaN	0
O13329	547	O13329	O13329	DNA replication fork-blocking protein FOB1	FOB1		0.5	0	2.27694e-05	81.311	70.255	81.311					0	0		NaN	0	0		NaN	0	0		NaN									0	0		NaN	0	0		NaN	0	0		NaN	0
O13329	447	O13329	O13329	DNA replication fork-blocking protein FOB1	FOB1		1	133.172	3.54292e-05	143.96	72.51	142.83	1	119.242	0.000147697	131.82	1	116.408	0.000155193	131.09	1	123.033	0.000119544	134.57	1	92.3579	0.000483525	97.456	1	129.281	3.54292e-05	143.96	1	110.937	0.000202539	123.51	1	80.8037	0.000507033	95.483	1	108.748	0.000200553	118.4	1	129.281	3.54292e-05	143.96	1
O13516;P05755	65;65	O13516	O13516	40S ribosomal protein S9-A;40S ribosomal protein S9-B	RPS9A;RPS9B		0.999928	41.4231	0.000305854	68.919	41.77	68.919	0.997595	26.1792	0.00115762	54.234	0.999928	41.4231	0.000305854	68.919	0.991131	20.4826	0.00111672	54.7	0.996983	25.1917	0.00438263	53.403	0.990922	20.3804	0.0121799	45.434	0.99024	20.063	0.00477981	44.601	0.989023	19.5471	0.00477981	44.601	0	0		NaN	0.991386	20.6102	0.00115762	54.234	0.99024
O13516;P05755	100;100	O13516	O13516	40S ribosomal protein S9-A;40S ribosomal protein S9-B	RPS9A;RPS9B		0.999753	37.1305	0.00265302	59.537	36.414	53.718
O13516;P05755	10;10	O13516	O13516	40S ribosomal protein S9-A;40S ribosomal protein S9-B	RPS9A;RPS9B		0.999898	39.9212	0.00145253	66.215	38.806	45.825					0	0		NaN									0	0		NaN					0	0		NaN					0	0		NaN
O14455;P05745	86;86	O14455	O14455	60S ribosomal protein L36-B;60S ribosomal protein L36-A	RPL36B;RPL36A		1	128.063	1.64376e-18	128.06	104.93	128.06
O14455	4	O14455	O14455	60S ribosomal protein L36-B	RPL36B		0.999996	54.2222	0.000528977	62.088	51.478	62.088	0	0		NaN					0	0		NaN	0	0		NaN													0	0		NaN	0	0		NaN
O14455;P05745	13;13	O14455	O14455	60S ribosomal protein L36-B;60S ribosomal protein L36-A	RPL36B;RPL36A		0.92023	10.6206	0.000131799	82.417	34.842	80.219	0	0		NaN					0	0		NaN	0	0		NaN													0	0		NaN	0	0		NaN
O14455	16	O14455	O14455	60S ribosomal protein L36-B	RPL36B		1	78.6552	8.85938e-05	78.655	60.846	78.655	0.999969	45.0775	0.0356349	45.077					0.999924	41.1636	0.0178983	41.164
O14467	106	O14467	O14467	Multiprotein-bridging factor 1	MBF1		1	69.7206	0.000578265	93.096	64.369	69.721									1	63.6242	0.0228764	63.624					0	0		NaN													1	60.5185	0.0301199	60.518	0
O14467	47	O14467	O14467	Multiprotein-bridging factor 1	MBF1		1	45.8792	6.09554e-05	79.771	62.265	45.879					0	0		NaN	1	78.1995	6.09554e-05	79.771	0	0		NaN	0	0		NaN	0.999955	43.4801	0.00355919	44.294	0	0		NaN	0	0		NaN	0	0		NaN	0.999991
O14467	149	O14467	O14467	Multiprotein-bridging factor 1	MBF1		0.949658	12.7563	0.00112688	60.401	56.797	56.569									0	0		NaN	0	0		NaN													0	0		NaN					0
O14467	150	O14467	O14467	Multiprotein-bridging factor 1	MBF1		0.545546	0.793413	0.00107707	60.401	56.797	60.401									0	0		NaN	0	0		NaN													0	0		NaN					0
O14467	151	O14467	O14467	Multiprotein-bridging factor 1	MBF1		0.382183	0.627714	0.00312341	55.841	44.579	55.841									0	0		NaN																									0
O14467	73	O14467	O14467	Multiprotein-bridging factor 1	MBF1		0.999105	30.476	1.42368e-05	89.805	73.864	76.847	0	0		NaN	0	0		NaN	0.94798	12.6063	0.0142532	59.198	0.97634	16.1558	0.0107976	46.706	0	0		NaN	0	0		NaN	0	0		NaN	0	0		NaN	0	0		NaN	0
O14467	75	O14467	O14467	Multiprotein-bridging factor 1	MBF1		0.927206	13.7113	0.00203736	52.693	39.901	49.448	0	0		NaN	0	0		NaN					0	0		NaN	0	0		NaN	0	0		NaN	0	0		NaN	0	0		NaN	0	0		NaN	0
O43137	55	O43137	O43137	Uncharacterized protein YBR085C-A	YBR085C-A		1	60.7879	0.00401198	62.717	15.07	60.788									1	57.5592	0.0448201	57.559	0	0		NaN									1	62.7172	0.0246337	62.717	0	0		NaN
O43137	62	O43137	O43137	Uncharacterized protein YBR085C-A	YBR085C-A		0.999999	62.842	3.13338e-06	84.829	53.315	84.829																													0	0		NaN
O43137	43	O43137	O43137	Uncharacterized protein YBR085C-A	YBR085C-A		0.999941	42.3169	0.0060727	42.317	22.923	42.317
O94742	85	O94742	O94742	26S proteasome complex subunit SEM1	SEM1		1	48.7409	0.00401375	54.608	39.036	48.741	0	0		NaN
O94742	13	O94742	O94742	26S proteasome complex subunit SEM1	SEM1		0.999969	45.0874	9.25282e-24	162.32	146.78	162.32																													0.901045	9.5931	1.92291e-07	85.288
O94742	18	O94742	O94742	26S proteasome complex subunit SEM1	SEM1		0.5	0	0.000643664	57.836	55.424	48.004																													0	0		NaN
P00044	105	P00044	P00044	Cytochrome c iso-1	CYC1		0.897523	9.42418	0.000679034	80.979	49.382	80.979
P00044	106	P00044	P00044	Cytochrome c iso-1	CYC1		0.564582	1.1282	3.94446e-05	79.82	66.467	79.82
P00044	61	P00044	P00044	Cytochrome c iso-1	CYC1		0.567125	1.17316	0.00353989	67.726	56.513	60.973	0	0		NaN					0.564693	1.13017	0.00353989	67.726	0.552744	0.919683	0.00563354	61.353	0	0		NaN					0	0		NaN	0.550538	0.880948	0.0144092	48.44	0	0		NaN
P00044	93	P00044	P00044	Cytochrome c iso-1	CYC1		0.618669	2.10156	0.00202419	86.113	31.588	74.335													0	0		NaN
P00330;P00331	315;315	P00330;P00331	P00330	Alcohol dehydrogenase 1;Alcohol dehydrogenase 2	ADH1;ADH2		0.997616	26.2163	3.96495e-06	85.42	69.785	82.102	0.974648	15.8484	0.00281298	53.403									0.966609	14.6163	0.00563172	49.188													0.926841	11.0274	0.00188764	57.328
P00330	319	P00330	P00330	Alcohol dehydrogenase 1	ADH1		1	128.811	5.27252e-07	128.81	99.067	128.81	1	107.455	1.08346e-05	107.45	1	74.162	0.00351578	74.162	1	67.0795	0.00883372	67.08	1	101.954	4.87277e-05	101.95	1	72.434	0.00422242	72.434	1	73.4995	0.00372197	73.499	1	66.5955	0.00925059	66.595	1	76.1427	0.00289941	76.143	1	81.865	0.00111865	81.865	1
P00330	164	P00330	P00330	Alcohol dehydrogenase 1	ADH1		0.999993	51.3212	0.000881101	57.803	33.344	57.803
P00330	224	P00330	P00330	Alcohol dehydrogenase 1	ADH1		0.913504	10.2371	3.79815e-05	70.837	62.748	64.654
P00330	226	P00330	P00330	Alcohol dehydrogenase 1	ADH1		1	121.798	2.21424e-07	128.86	62.784	128.86	1	119.749	2.21424e-07	128.28	0.999995	52.8667	0.00808709	52.867	1	121.798	6.879e-06	128.86	1	78.6143	0.00180758	79.974	0.999999	60.4363	0.00367983	60.436	1	64.738	0.00149444	67.897					1	65.5775	0.00511994	67.334	1	112.891	1.32024e-05	116.05	0.999985
P00330	348	P00330	P00330	Alcohol dehydrogenase 1	ADH1		1	59.2252	3.80706e-35	178.67	143.44	59.225	1	79.7406	2.78251e-21	135.66	1	93.8207	1.06592e-06	105.46	1	88.441	0.000710859	88.441	1	54.5244	8.71351e-05	101.95	1	91.8546	0.000193881	93.258	0	0		NaN	0	0		NaN	1	51.7258	0.00177882	72.006	1	81.865	0.00200037	81.865	0
P00330	18	P00330	P00330	Alcohol dehydrogenase 1	ADH1		0.999958	43.7637	1.39363e-21	141.32	122.9	141.32	0.992	20.9343	0.000620773	67.234					0	0		NaN	0.87821	8.57987	0.000140952	70.622	0	0		NaN	0	0		NaN	0	0		NaN					0.945658	12.406	0.0061257	59.607
P00330;P00331	84;84	P00330;P00331	P00330	Alcohol dehydrogenase 1;Alcohol dehydrogenase 2	ADH1;ADH2		1	69.7015	0.000695771	81.017	55.782	76.143	0	0		NaN					0	0		NaN	0	0		NaN	0	0		NaN													0	0		NaN
P00330;P00331	81;81	P00330;P00331	P00330	Alcohol dehydrogenase 1;Alcohol dehydrogenase 2	ADH1;ADH2		0.996979	25.1848	1.59173e-18	112.14	89.709	112.14	0.824254	6.71176	0.00013531	56.766
P00330	335	P00330	P00330	Alcohol dehydrogenase 1	ADH1		1	77.7949	6.53455e-13	121.31	110.26	94.461	1	66.0204	0.000101486	81.656	0.999625	34.257	0.00308256	48.177	0.999999	62.4636	0.000227036	73.279	0.534349	0.597638	0.000169081	77.146	0	0		NaN	0	0		NaN	0	0		NaN	0.717999	4.05872	2.43747e-05	91.207	0.996402	24.4236	0.021515	41.912	0
P00330	8	P00330	P00330	Alcohol dehydrogenase 1	ADH1		1	99.8021	2.47914e-07	116	76.489	99.802	1	78.1127	0.000142973	78.113	1	67.2637	6.28252e-05	83.386	1	66.2702	0.0223028	66.27	1	58.9807	0.000212763	71.085	1	67.8972	8.65376e-05	81.144	0.999998	56.9572	0.000223961	70.584	0.999999	60.7447	0.000155898	74.786	0	0		NaN	1	65.3052	2.47914e-07	104.28	0.999422
P00330	332	P00330	P00330	Alcohol dehydrogenase 1	ADH1		0.779099	5.47395	4.94292e-05	88.561	81.527	49.265					0	0		NaN									0	0		NaN	0	0		NaN	0	0		NaN					0	0		NaN	0
P00331	18	P00331	P00331	Alcohol dehydrogenase 2	ADH2		0.99955	33.4691	0.000256708	111.79	77.349	111.79													0	0		NaN
P00331	22	P00331	P00331	Alcohol dehydrogenase 2	ADH2		0.577145	1.35093	0.000616148	58.487	45.86	58.487													0	0		NaN
P00331	319	P00331	P00331	Alcohol dehydrogenase 2	ADH2		1	81.865	0.00111865	81.865	61.536	81.865	1	69.9792	0.00633651	69.979	0	0		NaN	1	65.5005	0.0101936	65.5	0	0		NaN	0	0		NaN									0	0		NaN	0	0		NaN
P00331	226	P00331	P00331	Alcohol dehydrogenase 2	ADH2		1	76.014	7.12901e-05	85.355	67.13	79.659	1	65.5678	0.000707135	71.349	0.999971	45.336	0.0110166	48.981	1	76.014	7.12901e-05	85.355	1	68.3999	0.00217897	74.841	0	0		NaN	0	0		NaN	0	0		NaN	1	68.7869	0.00233857	73.885	0	0		NaN	0
P00331	348	P00331	P00331	Alcohol dehydrogenase 2	ADH2		1	82.9999	3.69601e-05	93.058	53.349	83	1	46.0691	0.00536712	46.069	0	0		NaN	1	61.3533	0.000212443	93.058	1	52.5549	0.00166257	52.555	0	0		NaN	0	0		NaN					0	0		NaN	0	0		NaN	0
P00331	335	P00331	P00331	Alcohol dehydrogenase 2	ADH2		0.999995	53.039	0.000152532	85.493	60.326	57.52	0	0		NaN	0	0		NaN	0.999941	42.3169	0.0113168	42.317	0	0		NaN	0	0		NaN	0	0		NaN					0	0		NaN	0	0		NaN	0
P00331	332	P00331	P00331	Alcohol dehydrogenase 2	ADH2		0.808086	6.2435	0.00143026	63.754	36.785	53.169					0	0		NaN
P00358;P00359;P00360	217;217;217	P00358;P00359;P00360	P00359	Glyceraldehyde-3-phosphate dehydrogenase 2;Glyceraldehyde-3-phosphate dehydrogenase 3;Glyceraldehyde-3-phosphate dehydrogenase 1	TDH2;TDH3;TDH1		1	181.688	6.61317e-96	232.88	197.73	219.03	1	98.4179	1.79845e-51	190.86	1	165.185	1.84852e-51	190.57	1	79.116	9.90255e-52	195.51	1	78.6155	1.08261e-24	166.97	1	164.871	5.1464e-52	198.25	1	189.863	9.37838e-95	226.29	1	152.759	1.53401e-51	192.38	1	78.6155	4.85696e-14	137.98	1	174.881	1.41116e-78	215.87	1
P00358;P00359;P00360	225;225;225	P00358;P00359;P00360	P00359	Glyceraldehyde-3-phosphate dehydrogenase 2;Glyceraldehyde-3-phosphate dehydrogenase 3;Glyceraldehyde-3-phosphate dehydrogenase 1	TDH2;TDH3;TDH1		0.999925	41.2253	0.00211811	47.52	39.808	47.52													0	0		NaN
P00358;P00359;P00360	213;213;213	P00358;P00359;P00360	P00359	Glyceraldehyde-3-phosphate dehydrogenase 2;Glyceraldehyde-3-phosphate dehydrogenase 3;Glyceraldehyde-3-phosphate dehydrogenase 1	TDH2;TDH3;TDH1		0.994706	22.739	2.2053e-22	114.88	94.429	65.901	0.855348	7.7182	2.47946e-21	107.08	0.845791	7.39154	3.92556e-10	88.222	0.812107	6.35704	3.51993e-15	101.5	0.994706	22.739	2.73456e-05	65.901	0.874742	8.44076	2.2053e-22	114.88	0.85749	7.79385	2.1742e-07	80.83	0.860081	7.88664	2.73456e-05	65.901	0.988903	19.4993	9.6941e-05	60.991	0.859333	7.85969	1.27603e-07	81.922	0.844291
P00358;P00360	108;108	P00358;P00360		Glyceraldehyde-3-phosphate dehydrogenase 2;Glyceraldehyde-3-phosphate dehydrogenase 1	TDH2;TDH1		0.999996	54.5142	3.50681e-09	106.13	72.857	94.023	0.999524	33.2227	1.00678e-06	95.264	0.999934	41.8112	1.56966e-07	103.85	0.999992	51.0417	3.50681e-09	106.13	0.9999	40.0149	0.000140059	78.814	0.998811	29.2447	0.000136244	70.889	0.999613	34.1264	9.15309e-05	74.678	0.999535	33.3191	0.000164398	77.776	0.999283	31.4409	0.00443119	57.159	0.999769	36.362	2.31488e-05	86.291	0.999842
P00358;P00359	257;257	P00358;P00359	P00359	Glyceraldehyde-3-phosphate dehydrogenase 2;Glyceraldehyde-3-phosphate dehydrogenase 3	TDH2;TDH3		0.971345	15.3017	0.00155441	96.253	61.445	57.281	0.922883	10.78	0.00500273	83.265	0	0		NaN	0.920504	10.6368	0.00384231	84.568	0	0		NaN	0.899926	9.53885	0.00849858	71.501	0.93351	11.4737	0.00560687	75.738	0.914366	10.2847	0.00283017	72.485	0.92735	11.0601	0.00694116	73.26	0.914366	10.2847	0.00375812	83.206	0
P00358;P00359	258;258	P00358;P00359	P00359	Glyceraldehyde-3-phosphate dehydrogenase 2;Glyceraldehyde-3-phosphate dehydrogenase 3	TDH2;TDH3		0.685695	3.3878	0.00149893	84.476	54.809	68.735	0.579154	1.3867	0.00149893	66.692	0.562643	1.09397	0.00787634	54.608	0.574994	1.31267	0.00351833	55.064	0.567125	1.17316	0.0226759	60.973	0.583846	1.47044	0.00327442	84.476	0.549516	0.863009	0.0140742	52.79	0.572952	1.27642	0.0111446	56.258	0.547485	0.827386	0.0088937	45.137	0.575188	1.31613	0.00150822	66.621	0.557083
P00358;P00359	307;307	P00358;P00359	P00359	Glyceraldehyde-3-phosphate dehydrogenase 2;Glyceraldehyde-3-phosphate dehydrogenase 3	TDH2;TDH3		1	71.4507	0.000550414	71.451	45.056	71.451	0	0		NaN																													1	57.7081	0.0525777	57.708
P00358;P00359	331;331	P00358;P00359	P00359	Glyceraldehyde-3-phosphate dehydrogenase 2;Glyceraldehyde-3-phosphate dehydrogenase 3	TDH2;TDH3		1	52.3587	0.000264927	52.359	38.818	52.359					0	0		NaN																													0
P00358;P00360	184;184	P00358;P00360	P00358	Glyceraldehyde-3-phosphate dehydrogenase 2;Glyceraldehyde-3-phosphate dehydrogenase 1	TDH2;TDH1		0.999809	37.1956	0.000267648	64.209	45.091	44.729	0.997786	26.5379	0.0026368	48.656
P00358;P00360	192;192	P00358;P00360	P00358	Glyceraldehyde-3-phosphate dehydrogenase 2;Glyceraldehyde-3-phosphate dehydrogenase 1	TDH2;TDH1		1	108.129	2.28477e-51	147.28	127.08	147.28	1	85.9782	1.87605e-29	122.5	1	66.9214	5.29033e-10	89.32	1	108.129	2.28477e-51	147.28	1	82.675	5.47288e-14	94.192	1	74.5444	9.12247e-10	90.55	1	72.328	4.51136e-10	82.476	1	63.0694	1.67797e-06	79.875	1	84.1383	1.2055e-20	105.84	1	84.759	2.06616e-14	100.86	1
P00358;P00359	116;116	P00358;P00359	P00359	Glyceraldehyde-3-phosphate dehydrogenase 2;Glyceraldehyde-3-phosphate dehydrogenase 3	TDH2;TDH3		1	71.2538	2.24245e-06	82.635	55.864	82.635
P00358;P00359	137;137	P00358;P00359	P00359	Glyceraldehyde-3-phosphate dehydrogenase 2;Glyceraldehyde-3-phosphate dehydrogenase 3	TDH2;TDH3		0.999339	31.8003	2.32571e-07	81.94	52.957	81.94
P00358;P00359	143;143	P00358;P00359	P00359	Glyceraldehyde-3-phosphate dehydrogenase 2;Glyceraldehyde-3-phosphate dehydrogenase 3	TDH2;TDH3		1	134.129	9.77746e-46	157.73	145.42	157.73	1	110.688	4.91472e-35	134.29	1	88.0468	3.852e-15	101.94	1	116.877	1.99887e-43	140.17	1	103.163	6.71965e-14	112.54	1	85.9772	1.16029e-14	95.957	1	94.9077	8.01199e-12	101.94	1	70.1748	8.24175e-07	77.287	1	110.281	4.07109e-17	117.31	1	109.029	5.36166e-27	119.01	1
P00358;P00359	249;249	P00358;P00359	P00359	Glyceraldehyde-3-phosphate dehydrogenase 2;Glyceraldehyde-3-phosphate dehydrogenase 3	TDH2;TDH3		1	71.5012	8.68958e-14	139.89	107.26	71.501	1	104.844	2.75469e-10	128.31	1	77.8218	6.25391e-06	97.463	1	71.5012	5.54423e-06	100.19	0.999785	39.0387	0.0253544	43.382	0.999987	51.9356	0.00429264	59.306	0	0		NaN	0.999989	52.0317	0.0033012	60.628	0	0		NaN	0.999688	36.0695	0.0148818	43.68	0
P00359	108	P00359	P00359	Glyceraldehyde-3-phosphate dehydrogenase 3	TDH3		0.999996	54.5142	3.50681e-09	106.13	72.857	94.023	0.999524	33.2227	1.00678e-06	95.264	0.999934	41.8112	1.56966e-07	103.85	0.999992	51.0417	3.50681e-09	106.13	0.9999	40.0149	0.000140059	78.814	0.998811	29.2447	0.000136244	70.889	0.999613	34.1264	9.15309e-05	74.678	0.999535	33.3191	0.000164398	77.776	0.999283	31.4409	0.00443119	57.159	0.999769	36.362	2.31488e-05	86.291	0.999842
P00359	184	P00359	P00359	Glyceraldehyde-3-phosphate dehydrogenase 3	TDH3		1	74.495	2.18849e-47	161.22	144.73	161.22	1	64.222	4.83574e-43	137.43	0.999934	41.807	4.79554e-15	98.816	0.999999	60.4454	1.27236e-34	133.09	0.999992	50.9119	6.85283e-41	127.67	0.999554	33.5047	9.29251e-27	119.31	0.999871	38.8889	6.51605e-10	83.936	0.999798	36.9538	1.06612e-06	73.758	0.99998	46.9383	1.21988e-07	82.36	0.999995	53.3645	1.61153e-35	136.58	0.999764
P00359	192	P00359	P00359	Glyceraldehyde-3-phosphate dehydrogenase 3	TDH3		1	108.129	2.28477e-51	147.28	127.08	147.28	1	85.9782	1.87605e-29	122.5	1	66.9214	5.29033e-10	89.32	1	108.129	2.28477e-51	147.28	1	82.675	5.47288e-14	94.192	1	74.5444	9.12247e-10	90.55	1	72.328	4.51136e-10	82.476	1	63.0694	1.67797e-06	79.875	1	84.1383	1.2055e-20	105.84	1	84.759	2.06616e-14	100.86	1
P00359	101	P00359	P00359	Glyceraldehyde-3-phosphate dehydrogenase 3	TDH3		0.996623	24.6996	8.64125e-11	77.286	68.373	77.286
P00445	70	P00445	P00445	Superoxide dismutase [Cu-Zn]	SOD1		1	169.486	1.27067e-101	209.01	192.62	170.91	1	168.568	3.73797e-88	190.63	1	149.018	3.10145e-36	150.29	1	182.874	3.73797e-88	190.63	1	147.139	4.02353e-36	148.04	1	166.178	5.97595e-60	175.32	1	183.324	5.01034e-75	189.47	1	174.462	5.35774e-60	175.73	1	123.213	1.2379e-19	126.61	1	207.912	1.27067e-101	209.01	1
P00445	137	P00445	P00445	Superoxide dismutase [Cu-Zn]	SOD1		1	48.8475	0.00272668	48.848	38.79	48.848													0	0		NaN													0	0		NaN					0
P00447	80	P00447	P00447	Superoxide dismutase [Mn], mitochondrial	SOD2		0.998959	29.8195	0.00401198	53.3	45.113	53.3													0	0		NaN													0	0		NaN
P00549	240	P00549	P00549	Pyruvate kinase 1	CDC19		1	149.801	2.43579e-79	195.96	168.11	195.96	1	145.6	3.10974e-79	194.51	0.999543	33.3951	0.000814682	57.989					0	0		NaN					0	0		NaN					0	0		NaN	1	149.801	2.43579e-79	195.96
P00549	475	P00549	P00549	Pyruvate kinase 1	CDC19		0.999997	55.2612	0.00159136	55.261	47.882	55.261
P00560	108	P00560	P00560	Phosphoglycerate kinase	PGK1		1	88.441	2.70405e-17	164.43	107.86	88.441	1	164.425	2.70405e-17	164.43	1	107.055	2.40261e-08	107.06	1	138.25	1.9213e-11	138.25	1	59.2647	0.00994768	59.265	1	107.055	2.40261e-08	107.06	1	110.387	1.47403e-08	110.39	1	78.3416	0.000305268	78.342	1	100.878	2.68344e-07	100.88	1	115.175	1.396e-09	115.18	1
P00560	266	P00560	P00560	Phosphoglycerate kinase	PGK1		0.999171	30.8114	7.36941e-05	92.247	62.439	92.247													0.95304	13.0739	0.0282311	41.401	0	0		NaN													0	0		NaN
P00560	320	P00560	P00560	Phosphoglycerate kinase	PGK1		1	71.0845	8.80701e-11	85.537	77.45	71.085					0	0		NaN	0.685056	3.37493	3.93639e-05	60.521																	1	71.0845	0.00250511	71.085
P00560	328	P00560	P00560	Phosphoglycerate kinase	PGK1		0.745707	4.67233	9.28478e-06	63.573	53.986	50.04	0.611546	1.97089	9.28478e-06	63.573	0	0		NaN
P00560	351	P00560	P00560	Phosphoglycerate kinase	PGK1		0.999976	46.1437	0.00249509	62.891	41.642	56.569																													0	0		NaN					0
P00560	258	P00560	P00560	Phosphoglycerate kinase	PGK1		1	83.3141	9.46467e-143	231.29	219.16	83.314	1	111.057	3.05501e-49	162.72	1	47.2879	2.01913e-29	138.35	1	145.915	5.42695e-76	185.41	0.999995	52.7633	1.8912e-49	165.13	0.999989	49.52	2.97044e-62	177.93	0.999854	38.3653	4.95677e-49	158.78	0.999872	38.9343	2.59039e-13	109.85	0.999998	56.9472	1.29724e-22	133.1	1	95.5732	2.12215e-22	130.71	0.999786
P00560	33	P00560	P00560	Phosphoglycerate kinase	PGK1		0.999991	50.4642	0.00500798	50.653	30.557	50.653
P00560	380	P00560	P00560	Phosphoglycerate kinase	PGK1		0.539467	0.687041	5.68937e-09	101.49	96.491	77.391	0	0		NaN	0	0		NaN					0	0		NaN					0	0		NaN
P00560	386	P00560	P00560	Phosphoglycerate kinase	PGK1		1	69.979	1.75413e-10	89.946	77.269	69.979	0	0		NaN	0	0		NaN					0	0		NaN					0	0		NaN
P00560	74	P00560	P00560	Phosphoglycerate kinase	PGK1		1	96.6681	0.00345343	96.668	72.482	96.668	1	90.7088	0.00514778	90.709	1	71.692	0.019263	71.692	1	96.6681	0.00345343	96.668					0	0		NaN
P00560	82	P00560	P00560	Phosphoglycerate kinase	PGK1		1	51.3458	1.1691e-05	153.08	102.96	51.346	1	118.495	0.00193342	118.5	1	124.23	0.00157506	124.23	1	153.083	1.1691e-05	153.08	1	131.062	0.00113945	131.06	1	101.644	0.00273645	101.64	1	83.2647	0.00810378	83.265	1	69.5982	0.023421	69.598	1	106.599	0.0022413	106.6	1	101.721	0.00272523	101.72	1
P00560	15	P00560	P00560	Phosphoglycerate kinase	PGK1		0.997634	26.2504	6.08172e-06	140.78	103.71	63.864	0.971784	15.3708	4.37252e-05	95.094	0.798059	5.9681	0.00306035	70.089	0.977978	16.4748	6.08172e-06	107.09	0.936718	11.7033	9.13678e-05	93.623	0	0		NaN	0.79853	5.98081	0.0040295	65.179	0.811473	6.339	0.0126833	40.725	0.867849	8.17372	6.50505e-06	106.49	0.951877	12.9623	0.00774248	47.712	0.948666
P00560	17	P00560	P00560	Phosphoglycerate kinase	PGK1		0.727842	4.27217	7.84713e-06	110.14	89.234	110.14					0.552622	0.917529	4.06174e-05	79.82	0	0		NaN	0	0		NaN	0.602267	1.80197	0.022995	40.475	0	0		NaN					0	0		NaN	0	0		NaN	0
P00560	6	P00560	P00560	Phosphoglycerate kinase	PGK1		0.999974	45.7887	1.80695e-15	141.71	79.946	72.2	0	0		NaN
P00560	379	P00560	P00560	Phosphoglycerate kinase	PGK1		0.5	0	5.68937e-09	101.49	96.491	101.49	0	0		NaN
P00560	345	P00560	P00560	Phosphoglycerate kinase	PGK1		0.997124	25.3998	8.67557e-11	108.18	92.283	91.725																													0	0		NaN					0
P00560	139	P00560	P00560	Phosphoglycerate kinase	PGK1		0.981351	17.2117	0.00294913	68.657	50.598	68.657
P00812	11	P00812	P00812	Arginase	CAR1		0.999997	55.0653	0.000150292	55.67	48.947	55.67
P00812	194	P00812	P00812	Arginase	CAR1		0.981464	17.2385	0.0019605	70.028	52.592	70.028
P00815	137	P00815	P00815	Histidine biosynthesis trifunctional protein;Phosphoribosyl-AMP cyclohydrolase;Phosphoribosyl-ATP pyrophosphohydrolase;Histidinol dehydrogenase	HIS4		1	64	0.00537327	88.819	54.73	88.819													0	0		NaN	0.999989	49.6206	0.0109588	78.77	0	0		NaN	0	0		NaN	1	64	0.00537327	88.819	0	0		NaN	0
P00817	57	P00817	P00817	Inorganic pyrophosphatase	IPP1		1	51.8194	0.00184071	51.819	36.891	51.819									0	0		NaN					1	43.8101	0.00867857	43.81	0	0		NaN									1	51.8194	0.00184071	51.819
P00817	256	P00817	P00817	Inorganic pyrophosphatase	IPP1		0.999975	46.0339	8.90335e-11	83.088	72.545	83.088					0	0		NaN	0.974718	15.8607	0.000774707	47.757																					0.999017	30.072	0.000816153	47.507
P00817	62	P00817	P00817	Inorganic pyrophosphatase	IPP1		1	91.0411	0.0013548	91.041	7.2403	91.041																	1	91.0411	0.0501063	91.041	0.999989	49.5759	0.0013548	58.83	0	0		NaN					0	0		NaN	0
P00817	17	P00817	P00817	Inorganic pyrophosphatase	IPP1		0.999953	43.2737	0.00587464	63.076	25.884	48.568									0	0		NaN
P00817	112	P00817	P00817	Inorganic pyrophosphatase	IPP1		1	77.0624	1.06027e-07	109.24	74.012	77.062	1	73.9513	0.000863155	73.951	0	0		NaN	1	84.4793	0.000100957	84.479					1	78.0962	0.000533023	78.096									1	61.4352	0.00719041	61.435	1	99.752	1.10922e-06	99.752
P00890;P08679	237;218	P00890	P00890	Citrate synthase, mitochondrial;Citrate synthase, peroxisomal	CIT1;CIT2		1	73.1206	5.92257e-05	77.222	67.423	77.222	0	0		NaN	0	0		NaN	1	73.1206	5.92257e-05	77.222					0	0		NaN					0	0		NaN					0	0		NaN	0
P00890	69	P00890	P00890	Citrate synthase, mitochondrial	CIT1		1	88.2217	1.02161e-14	101.49	70.63	101.49
P00890;P08679	234;215	P00890	P00890	Citrate synthase, mitochondrial;Citrate synthase, peroxisomal	CIT1;CIT2		0.986869	18.7595	0.00234931	58.676	33.823	58.676
P00890	401	P00890	P00890	Citrate synthase, mitochondrial	CIT1		0.992213	21.0521	8.07888e-05	103.34	80.867	93.058	0.986639	18.6834	0.00011002	103.34	0.992213	21.0521	0.000264966	93.058	0.992171	21.0289	0.000147901	100.72	0.987433	18.9527	0.00728214	59.542	0.975687	16.0347	0.00108341	79.659	0.98494	18.156	0.000287354	91.937					0.907669	9.92581	0.0124259	51.927	0.982807	17.5711	0.000865961	80.979	0.983574
P00890	404	P00890	P00890	Citrate synthase, mitochondrial	CIT1		0.628305	2.27983	0.00486564	50.284	39.454	50.284													0.540802	0.710383	0.00486564	41.912													0	0		NaN
P00924;P00925	346;346	P00924;P00925	P00925	Enolase 1;Enolase 2	ENO1;ENO2		0.998233	27.5196	0.00697143	51.819	38.878	51.819																													0	0		NaN
P00924;P00925	178;178	P00924;P00925	P00925	Enolase 1;Enolase 2	ENO1;ENO2		1	71.6136	0.00492892	71.614	53.882	71.614																																	1	71.6136	0.00492892	71.614
P00924	79	P00924	P00924	Enolase 1	ENO1		0.969664	15.0466	1.39004e-06	100.45	94.419	68.82	0.969664	15.0466	0.000108754	68.82	0	0		NaN	0	0		NaN					0.620171	2.12924	0.00432984	48.288	0	0		NaN					0.910111	10.0539	5.59203e-05	80.638	0	0		NaN
P00924	338	P00924	P00924	Enolase 1	ENO1		1	90.6566	0.00184774	90.657	51.22	90.657	0	0		NaN					0	0		NaN	1	78.3345	0.00184774	78.334									0	0		NaN	0.505119	0.0889309	0.00402587	52.579
P00924;P00925	200;200	P00924;P00925	P00925	Enolase 1;Enolase 2	ENO1;ENO2		1	52.0611	1.14029e-69	184.3	163.55	52.061	1	95.1382	1.72001e-14	95.138	1	129.898	5.0792e-39	129.9	1	184.295	1.14029e-69	184.3	1	65.7535	4.7693e-05	65.753	1	55.7342	0.000642888	55.734	1	60.0318	0.000252666	60.032	1	79.762	5.21528e-07	79.762	0	0		NaN	1	73.3893	1.41706e-06	73.389	1
P00924	337	P00924	P00924	Enolase 1	ENO1		0.882507	8.75705	2.78226e-14	100.19	70.3	69.276	0	0		NaN					0.882507	8.75705	0.00115908	69.276	0	0		NaN									0	0		NaN	0	0		NaN	0	0		NaN
P00925	338	P00925	P00925	Enolase 2	ENO2		1	90.6566	3.21374e-11	90.657	81.3	90.657													1	78.3345	0.0123558	78.334													0.5	0	0.000658964	48.867
P00925	139	P00925	P00925	Enolase 2	ENO2		0.891132	9.1304	0.000517096	63.631	59.727	63.631																													0	0		NaN
P00925	105	P00925	P00925	Enolase 2	ENO2		1	87.5067	5.19248e-10	90.084	80.326	90.084
P00925	337	P00925	P00925	Enolase 2	ENO2		0.5	0	3.21374e-11	90.633	81.3	90.633																													0.5	0	0.000658964	48.867
P00925	195	P00925	P00925	Enolase 2	ENO2		0.97985	16.8689	0.000467911	67.227	42.502	67.227
P00942	84	P00942	P00942	Triosephosphate isomerase	TPI1		0.996987	25.1973	0.0013719	56.017	40.425	42.981									0.989552	19.7641	0.0013719	56.017																	0	0		NaN	0	0		NaN
P00942	199	P00942	P00942	Triosephosphate isomerase	TPI1		1	96.4916	0.00726355	96.492	24.471	96.492									1	73.2482	0.0300468	73.248
P00950	246	P00950	P00950	Phosphoglycerate mutase 1	GPM1		0.985621	18.3597	2.3919e-19	142.89	135.17	128.08	0.5	0	1.4491e-14	118.26	0.5	0	0.000513981	63.76					0.5	0	1.11443e-07	104.17	0.985621	18.3597	4.29898e-12	128.08									0.5	0	0.000442732	67.563	0.5	0	1.23832e-06	89.247
P00950	247	P00950	P00950	Phosphoglycerate mutase 1	GPM1		0.877086	8.53442	2.14258e-30	186.02	180.18	61.11	0.601787	1.79328	6.1684e-18	161.94	0.572709	1.2721	4.38196e-12	127.37	0.612693	1.99187	2.14258e-30	186.02	0.569872	1.22179	1.50351e-11	117.23	0	0		NaN	0.561522	1.07418	2.17431e-06	83.617	0.595131	1.67298	4.20917e-12	128.85	0.584459	1.48141	4.45329e-12	126.76	0.601787	1.79328	6.1684e-18	161.94	0.567549
P00950	109	P00950	P00950	Phosphoglycerate mutase 1	GPM1		1	134.374	4.28227e-101	204.92	183.22	135.72	1	73.0069	7.04826e-07	74.222	0	0		NaN	0	0		NaN	0.980064	16.9162	1.27902e-34	135.35	0.5	0	8.51991e-09	74.838	0.999999	62.0473	1.08169e-28	115.66	1	102.347	1.06218e-29	125.12	0.978361	16.5526	2.32285e-39	134.69	1	119.475	8.95615e-30	120	1
P00950	104	P00950	P00950	Phosphoglycerate mutase 1	GPM1		0.531444	0.546964	9.42297e-29	119.36	101.83	65.248					0	0		NaN	0	0		NaN	0	0		NaN	0.5	0	8.51991e-09	74.838	0	0		NaN	0	0		NaN	0	0		NaN	0.5	0	0.00684376	68.516	0
P00950	31	P00950	P00950	Phosphoglycerate mutase 1	GPM1		1	98.6294	0.00134511	133.55	84.19	98.629	1	114.602	0.00428098	114.6	1	58.9172	0.052858	58.917	1	133.548	0.00134511	133.55	1	58.9811	0.0526196	58.981	0	0		NaN	0	0		NaN					0	0		NaN
P00950	3	P00950	P00950	Phosphoglycerate mutase 1	GPM1		1	98.8732	2.96225e-05	108.66	72.632	108.66													1	66.625	0.00031866	70.529	0	0		NaN	0	0		NaN					0.999991	50.6942	0.0050115	54.598
P01094	59	P01094	P01094	Protease A inhibitor 3	PAI3		0.993672	21.9601	6.41532e-06	106.62	90.086	106.62	0.990689	20.2693	0.000488456	69.01													0.903108	9.6945	0.00592419	50.284					0.963439	14.2081	0.00845394	46.706					0.973776	15.6977	0.000980976	64.439	0.96893
P01094	61	P01094	P01094	Protease A inhibitor 3	PAI3		0.549652	0.865392	0.00212861	59.542	53.356	59.542									0.542331	0.737133	0.00701502	48.741
P01094	16	P01094	P01094	Protease A inhibitor 3	PAI3		0.5	0	1.12054e-05	97.734	78.602	97.734
P01094	18	P01094	P01094	Protease A inhibitor 3	PAI3		0.552505	0.915485	1.12054e-05	97.734	78.602	68.069
P01097	72	P01097	P01097	ATPase inhibitor, mitochondrial	INH1		0.999999	60.7579	0.00702381	69.998	25.306	69.998	0	0		NaN					0.999999	59.4105	0.00702381	69.825	0	0		NaN	0	0		NaN	0	0		NaN	0	0		NaN	0.999989	49.5745	0.0493825	58.815	0.999999	60.7579	0.0565011	69.998	0
P01098	64	P01098	P01098	ATPase-stabilizing factor 9 kDa, mitochondrial	STF1		0.999991	50.2966	3.87065e-05	102.87	86.147	102.87	0	0		NaN	0.999807	37.143	0.00907171	59.198					0	0		NaN	0.993616	21.9211	0.0272164	43.68	0	0		NaN									0	0		NaN
P02293;P02294	17;17	P02293;P02294	P02294	Histone H2B.1;Histone H2B.2	HTB1;HTB2		0.984381	18.4808	0.000121381	80.24	36.282	60.59	0	0		NaN	0	0		NaN	0.495065	0	0.0248841	49.418	0.834824	7.05402	0.00815251	61.593	0	0		NaN	0	0		NaN	0	0		NaN	0.899758	9.54722	0.000121381	78.098	0.495765	0	0.0119025	40.994	0
P02293;P02294	18;18	P02293;P02294	P02294	Histone H2B.1;Histone H2B.2	HTB1;HTB2		0.499709	0	0.00213141	61.78	41.002	56.013	0	0		NaN	0	0		NaN	0.495065	0	0.0248841	49.418					0	0		NaN	0	0		NaN	0	0		NaN					0.495765	0	0.0119025	40.994	0
P02293	38	P02293	P02293	Histone H2B.1	HTB1		1	64.9202	3.35499e-05	78.324	56.278	78.324
P02293	47	P02293	P02293	Histone H2B.1	HTB1		0.999013	30.0516	0.000422691	82.749	67.159	60.49	0	0		NaN	0	0		NaN					0	0		NaN	0	0		NaN	0	0		NaN	0	0		NaN	0	0		NaN	0	0		NaN
P02293;P02294	89;89	P02293;P02294	P02294	Histone H2B.1;Histone H2B.2	HTB1;HTB2		0.91301	10.21	0.00553714	72.618	20.029	46.766													0	0		NaN	0	0		NaN	0.677731	3.22839	0.00553714	72.618	0.523892	0.415361	0.0543108	46.766	0	0		NaN	0.746278	4.68542	0.0489137	51.036	0
P02293;P02294	50;50	P02293;P02294	P02294	Histone H2B.1;Histone H2B.2	HTB1;HTB2		1	162.972	3.5662e-50	220.23	189.97	179.6	1	103.364	4.1822e-13	121.45	1	80.5339	2.58391e-08	105.99	1	130.748	2.22503e-21	151.99	1	110.621	1.17832e-16	130.2	1	125.453	3.46131e-27	151.99	1	148.152	3.45646e-27	167.73	1	151.706	2.30701e-27	170.95	1	149.216	1.18401e-22	174.39	1	157.66	2.15621e-41	170.62	1
P02293;P02294	124;124	P02293;P02294	P02294	Histone H2B.1;Histone H2B.2	HTB1;HTB2		1	98.5428	0	344.72	334.96	98.543	1	65.231	6.21181e-47	193.81	1	96.4641	2.71961e-47	193.81	1	87.2873	3.80413e-47	172.99	1	47.9148	8.88309e-22	173.19	1	42.3376	4.10968e-138	242.26	1	67.8659	1.09843e-200	275.23	1	80.9797	2.5472e-224	268.56	1	157.384	1.61441e-36	194.24	1	114.885	2.88118e-120	226.24	1
P02293;P02294	112;112	P02293;P02294	P02294	Histone H2B.1;Histone H2B.2	HTB1;HTB2		1	68.4215	8.98598e-35	156.87	136.78	68.422													0	0		NaN	1	89.1423	5.05964e-23	119.62	1	75.8543	3.45555e-34	152.13	1	98.9966	1.55606e-09	98.997	1	77.6741	3.13805e-31	135.91	1	113.889	4.11055e-34	150.91	1
P02293	8	P02293	P02293	Histone H2B.1	HTB1		0.999989	49.6539	0.000544188	69.672	44.05	52.167	0.519935	0.346847	0.00730879	47.302	0.968549	14.8871	0.00182214	60.49	0	0		NaN					0	0		NaN	0.56627	1.15806	0.00123297	63.624	0	0		NaN	0.717343	4.04475	0.00154722	61.435	0	0		NaN	0.5
P02293	12	P02293	P02293	Histone H2B.1	HTB1		0.999997	55.5075	8.02936e-06	120.09	79.061	111.06	0.926934	11.0361	0.0236706	48.785	0.999977	46.512	7.79898e-05	102.06	0.994811	23.3428	0.001437	72.34	0.999016	30.133	0.000226959	78.556	0.999776	36.5201	7.5099e-05	91.584	0.999812	37.5885	0.000387484	82.749	0.999842	38.0212	9.13425e-05	102.06	0.999918	40.9512	0.00100197	96.015	0.999706	35.3258	9.83288e-05	91.584	0.999591
P02293;P02294	90;90	P02293;P02294	P02294	Histone H2B.1;Histone H2B.2	HTB1;HTB2		0.68438	3.36132	0.00697552	98.03	45.441	98.03													0	0		NaN	0.658496	2.85157	0.00919735	83.229	0.658496	2.85157	0.00697552	83.229	0.658496	2.85157	0.00856152	83.229	0.68438	3.36132	0.0139824	98.03					0.621329
P02293	4	P02293	P02293	Histone H2B.1	HTB1		1	75.4745	9.4201e-05	110.63	43.598	107.43	0.999998	56.8849	0.00137152	73.039	0.99998	47.0692	0.00277384	69.998	0.999999	61.4026	0.00101956	91.906					0.99988	39.2209	0.0362744	49.358	0.999332	31.7525	0.0414377	41.502	1	70.3876	0.0165112	101.69					0.999923	41.1514	0.00989373	60.788	1
P02294	47	P02294	P02294	Histone H2B.2	HTB2		0.999013	30.0516	0.000422691	82.749	67.159	60.49	0	0		NaN	0	0		NaN					0	0		NaN	0	0		NaN	0	0		NaN	0	0		NaN	0	0		NaN	0	0		NaN
P02294	8	P02294	P02294	Histone H2B.2	HTB2		0.999989	49.6539	9.62848e-06	86.114	72.714	52.167	0.580061	1.52541	0.0071916	56.225	0.968549	14.8871	0.00182214	60.49	0	0		NaN	0.46115	0	0.00744729	64.297	0.58603	1.62655	0.00378112	64.55	0.56627	1.15806	0.00123297	63.624	0.493679	0	0.0195667	45.257	0.717343	4.04475	0.00154722	61.435	0	0		NaN	0.5
P02294	12	P02294	P02294	Histone H2B.2	HTB2		0.999997	55.5075	8.02936e-06	120.09	79.061	111.06	0.926934	11.0361	0.0236706	48.785	0.999977	46.512	7.79898e-05	102.06	0.994811	23.3428	0.001437	72.34	0.999016	30.133	0.000226959	78.556	0.999776	36.5201	7.5099e-05	91.584	0.999812	37.5885	0.000387484	82.749	0.999842	38.0212	9.13425e-05	102.06	0.999918	40.9512	0.00100197	96.015	0.999706	35.3258	9.83288e-05	91.584	0.999591
P02294	7	P02294	P02294	Histone H2B.2	HTB2		0.999915	40.6815	6.11923e-31	170.52	136.13	86.114	0.919653	10.7059	9.73312e-05	72.846	0.859668	8.01552	0.000402468	69.451	0.894747	9.40394	6.17067e-05	82.362	0.988877	19.4911	5.93666e-06	106.49	0.890462	9.94711	3.99046e-05	80.688	0.887753	9.10058	9.98539e-06	93.111	0.903478	9.77981	8.86758e-05	73.848	0.995684	23.6314	3.95387e-10	129.16	0.893163	9.23098	9.43326e-06	99.5	0.877737
P02309	9	P02309	P02309	Histone H4	HHF1		0.999998	57.5128	0.000529067	114.02	31.76	114.02	0.98699	18.8005	0.0112105	75.311	0.972212	15.4391	0.0131297	71.949	0.999542	33.3927	0.00523589	89.903					0.951451	12.922	0.0162324	69.432	0.999001	30.002	0.0112105	86.512	0.999987	48.7607	0.0219715	103.29					0.994729	22.7584	0.00436611	92.191	0.997315
P02309	13	P02309	P02309	Histone H4	HHF1		0.994175	22.3213	0.0039705	83.614	42.694	76.847	0.862258	7.96572	0.0146549	50.966	0.99141	20.6227	0.00681033	66.993									0.994175	22.3213	0.0039705	76.847	0	0		NaN	0.94607	12.4409	0.0121603	55.441					0.597793	1.72101	0.0253362	44.721	0.527592
P02309	80	P02309	P02309	Histone H4	HHF1		1	160.273	3.98908e-130	224.65	195.2	160.27	1	140.984	4.68315e-18	141.46	1	125.975	1.03774e-14	125.97	1	127.712	1.61766e-16	127.71	1	138.767	3.21726e-47	163.66	1	136.826	7.57892e-19	136.83	1	137.456	2.25038e-21	137.46	1	145.428	4.8058e-22	145.43	1	128.962	9.00358e-20	130	1	137.456	2.87928e-88	193.8	1
P02309	92	P02309	P02309	Histone H4	HHF1		1	58.9971	0.00166864	58.997	40.237	58.997	0	0		NaN	0	0		NaN	0	0		NaN	0	0		NaN	0	0		NaN	0	0		NaN	0	0		NaN	0	0		NaN	0	0		NaN
P02309	78	P02309	P02309	Histone H4	HHF1		0.998018	27.0206	1.52459e-167	254.55	228.07	243.06	0.980449	17.0025	4.88725e-60	176.42	0.941048	12.0311	2.00096e-88	196.06	0.982256	17.4316	2.17208e-130	228.63	0.98957	19.7717	2.1403e-166	250.83	0.736915	4.47322	1.60054e-88	197.09	0.929859	11.2244	3.5414e-90	201.12	0.93406	11.5123	1.36393e-115	221.24	0.988095	19.1905	3.51455e-47	162.76	0.797353	5.9491	2.87928e-88	193.8	0.997289
P02381	2	P02381	P02381	Ribosomal protein VAR1, mitochondrial	VAR1		0.999981	50.4097	0.00464535	57.567	36.812	57.567
P02381	4	P02381	P02381	Ribosomal protein VAR1, mitochondrial	VAR1		0.999959	46.8476	0.00464535	57.567	36.812	57.567
P02406	132	P02406	P02406	60S ribosomal protein L28	RPL28		1	141.482	1.02753e-40	189.57	133.45	189.57	1	141.482	1.02753e-40	189.57	1	117.925	1.56716e-23	165.63	1	108.499	2.79922e-06	125.22	1	122.421	1.95369e-17	151.15	1	111.889	2.1419e-17	150.46	1	111.756	1.68394e-13	143.97	1	100.447	7.49739e-06	110.38	1	91.7133	1.13092e-08	122.51	1	116.215	4.88921e-23	158.41	1
P02406	137	P02406	P02406	60S ribosomal protein L28	RPL28		1	66.5682	0.000931654	66.568	33.834	66.568	0	0		NaN																	0	0		NaN	0	0		NaN	0	0		NaN					0
P02406	111	P02406	P02406	60S ribosomal protein L28	RPL28		0.998803	29.2124	8.21817e-08	110.56	91.169	110.56																	0	0		NaN					0	0		NaN					0	0		NaN	0
P02406	115	P02406	P02406	60S ribosomal protein L28	RPL28		0.999968	44.9371	0.00105657	69.352	67.859	69.352
P02406	126	P02406	P02406	60S ribosomal protein L28	RPL28		0.999598	33.9557	5.54954e-10	96.163	90.735	59.513	0.919661	10.587	0.00033423	63.918	0	0		NaN	0.913056	10.2126	0.000476782	61.648	0.985614	18.3577	1.25904e-05	76.145	0.964852	14.3856	0.00033423	63.918	0.999595	33.9246	0.000381727	86.378	0.99504	23.024	0.000210691	72.583	0.999408	32.2767	2.38346e-07	87.088	0.937237	11.7414	0.000441978	61.821	0.973949
P02406	86	P02406	P02406	60S ribosomal protein L28	RPL28		0.999982	47.3499	2.48604e-06	122.46	79.939	110.51
P02406	92	P02406	P02406	60S ribosomal protein L28	RPL28		0.97546	16.0848	0.00266195	64.476	42.178	64.476
P02406	96	P02406	P02406	60S ribosomal protein L28	RPL28		1	65.4472	7.43653e-05	65.47	48.251	65.47																	0	0		NaN					0	0		NaN					0	0		NaN	0
P02406	55	P02406	P02406	60S ribosomal protein L28	RPL28		0.999996	54.062	3.02393e-08	93.958	82.485	78.287													0	0		NaN					0	0		NaN					0.999403	32.2342	0.000509294	63.76
P14127;P02407	23;23	P14127	P14127	40S ribosomal protein S17-B;40S ribosomal protein S17-A	RPS17B;RPS17A		1	134.315	5.75923e-57	171.93	146.99	171.93	1	131.354	9.80271e-47	164.53	1	134.315	4.75005e-28	171.93	1	113.452	1.40602e-13	152.88	1	113.362	4.39128e-19	134.37	1	106.458	3.52736e-36	156.86	1	114.928	5.75923e-57	170.79	1	85.3555	3.03491e-26	141.22	1	108.677	1.04155e-18	130.95	1	120.216	1.38765e-13	152.95	1
P14127;P02407	32;32	P14127	P14127	40S ribosomal protein S17-B;40S ribosomal protein S17-A	RPS17B;RPS17A		1	73.829	6.40774e-28	143.57	127.34	143.57	0	0		NaN									0	0		NaN	0	0		NaN													0	0		NaN	0
P14127;P02407	72;72	P14127	P14127	40S ribosomal protein S17-B;40S ribosomal protein S17-A	RPS17B;RPS17A		1	64.82	5.72748e-05	80.975	72.266	64.82	1	56.0944	0.000188174	68.41	1	64.82	5.72748e-05	80.975	0.99464	22.685	0.000344537	61.102	0.999084	30.3774	8.31878e-05	77.468									0	0		NaN	0.951954	12.9696	0.00144084	50.053	0	0		NaN
P14127;P02407	81;81	P14127	P14127	40S ribosomal protein S17-B;40S ribosomal protein S17-A	RPS17B;RPS17A		0.570181	1.22726	0.00192288	48.907	39.975	48.907									0.570181	1.22726	0.00192288	48.907	0	0		NaN									0	0		NaN	0	0		NaN	0	0		NaN
P14127;P02407	59;59	P14127	P14127	40S ribosomal protein S17-B;40S ribosomal protein S17-A	RPS17B;RPS17A		0.978487	16.5786	1.29659e-06	95.417	87.241	58.674	0	0		NaN	0	0		NaN	0	0		NaN	0	0		NaN	0	0		NaN									0	0		NaN	0	0		NaN
P14127;P02407	63;63	P14127	P14127	40S ribosomal protein S17-B;40S ribosomal protein S17-A	RPS17B;RPS17A		0.579264	1.38866	0.000152979	72.937	60.577	72.937	0	0		NaN	0	0		NaN	0	0		NaN					0	0		NaN									0	0		NaN
P14127;P02407	44;44	P14127	P14127	40S ribosomal protein S17-B;40S ribosomal protein S17-A	RPS17B;RPS17A		0.961307	13.9523	3.81845e-05	88.992	80.633	62.357	0	0		NaN	0	0		NaN	0	0		NaN	0	0		NaN	0	0		NaN	0	0		NaN	0	0		NaN					0	0		NaN
P14127;P02407	49;49	P14127	P14127	40S ribosomal protein S17-B;40S ribosomal protein S17-A	RPS17B;RPS17A		1	74.3377	3.81845e-05	88.992	80.633	74.769	0	0		NaN	0	0		NaN	0	0		NaN	0	0		NaN	0	0		NaN	0	0		NaN	0	0		NaN	0.999999	59.6073	0.00135006	59.607	0	0		NaN
P14127;P02407	14;14	P14127	P14127	40S ribosomal protein S17-B;40S ribosomal protein S17-A	RPS17B;RPS17A		0.999997	55.8408	0.00094095	55.841	41.409	55.841													0	0		NaN													0	0		NaN
P02557	390	P02557	P02557	Tubulin beta chain	TUB2		1	51.4453	3.68487e-06	104.17	94.103	51.445													0	0		NaN													0	0		NaN
P02557	392	P02557	P02557	Tubulin beta chain	TUB2		1	51.4453	0.000263071	62.891	58.648	51.445													0	0		NaN													0	0		NaN
P02829;P15108	98;98	P02829;P15108	P15108	ATP-dependent molecular chaperone HSP82;ATP-dependent molecular chaperone HSC82	HSP82;HSC82		0.667183	3.0204	0.000201736	81.346	60.393	81.346
P02829	240	P02829	P02829	ATP-dependent molecular chaperone HSP82	HSP82		0.305375	0	0.00339295	44.816	36.727	44.816	0	0		NaN	0	0		NaN	0	0		NaN					0	0		NaN									0	0		NaN	0	0		NaN
P02829	241	P02829	P02829	ATP-dependent molecular chaperone HSP82	HSP82		0.559093	1.03137	6.74588e-08	101.53	95.716	87.498	0.5	0	0.000356157	61.167	0.5	0	4.09165e-06	88.075	0.548501	0.845212	0.000860992	56.569	0.5	0	9.78542e-08	97.86	0	0		NaN					0	0		NaN	0	0		NaN	0	0		NaN	0.5
P02829	243	P02829	P02829	ATP-dependent molecular chaperone HSP82	HSP82		0.97661	18.9286	2.18852e-17	139.78	127.63	65.423	0.5	0	0.000356157	61.167	0.5	0	4.09165e-06	88.075	0	0		NaN	0.5	0	9.78542e-08	97.86	0	0		NaN					0	0		NaN	0	0		NaN	0	0		NaN	0.5
P02829	256	P02829	P02829	ATP-dependent molecular chaperone HSP82	HSP82		0.381515	0.91212	4.59269e-05	74.76	54.921	74.76
P02829;P15108	480;476	P02829;P15108	P15108	ATP-dependent molecular chaperone HSP82;ATP-dependent molecular chaperone HSC82	HSP82;HSC82		0.99734	25.7396	0.000668815	73.834	44.479	62.377
P02829;P15108	335;331	P02829;P15108	P15108	ATP-dependent molecular chaperone HSP82;ATP-dependent molecular chaperone HSC82	HSP82;HSC82		0.969893	15.0806	7.73728e-05	83.182	65.363	57.164	0	0		NaN					0	0		NaN	0	0		NaN	0	0		NaN	0	0		NaN									0	0		NaN	0
P02829;P15108	336;332	P02829;P15108	P15108	ATP-dependent molecular chaperone HSP82;ATP-dependent molecular chaperone HSC82	HSP82;HSC82		0.553637	0.935368	7.73728e-05	75.695	75.695	75.695	0	0		NaN					0	0		NaN	0	0		NaN	0	0		NaN	0	0		NaN					0.53684	0.641137	0.0334973	45.257	0	0		NaN	0
P02829;P15108	637;633	P02829;P15108	P15108	ATP-dependent molecular chaperone HSP82;ATP-dependent molecular chaperone HSC82	HSP82;HSC82		0.990467	20.1662	0.00166357	62.162	47.482	62.162
P02829;P15108	618;614	P02829;P15108	P15108	ATP-dependent molecular chaperone HSP82;ATP-dependent molecular chaperone HSC82	HSP82;HSC82		0.999267	31.3483	0.000761754	72.731	53.104	72.731
P02994	129	P02994	P02994	Elongation factor 1-alpha	TEF1		1	94.6162	6.53427e-11	124.42	79.055	94.616	1	114.862	1.4714e-05	114.86	0	0		NaN	0	0		NaN	1	100.878	0.000145641	100.88	0	0		NaN	1	102.4	0.000123632	102.4	0	0		NaN	1	88.5961	0.000354109	88.596					0
P02994	390	P02994	P02994	Elongation factor 1-alpha	TEF1		0.999999	61.6521	1.48687e-07	134.3	108.19	134.3	0.999898	39.9182	3.9606e-05	114.86	0.999703	35.2785	2.31027e-05	118.28	0.999999	61.6521	1.48687e-07	134.3	0.999976	46.1645	0.000201685	102.52	0.999826	37.7728	0.000185317	88.056	0.998904	29.5979	2.31027e-05	118.28	0.999866	39.0145	0.00112329	72.243	0	0		NaN	0.9845	18.0288	1.79235e-05	120.09	0.984555
P02994	393	P02994	P02994	Elongation factor 1-alpha	TEF1		1	92.0245	4.55723e-06	112.13	60.257	109.24	1	87.8339	8.90928e-06	112.13	1	81.6082	2.46381e-05	95.502	1	92.0245	4.55723e-06	109.24	1	79.592	0.000280386	88.596	1	80.3367	0.000357208	88.441	1	77.6739	1.27395e-05	94.616	0	0		NaN	1	75.143	0.00108341	79.659	1	72.7392	0.000432784	84.658	1
P02994	177	P02994	P02994	Elongation factor 1-alpha	TEF1		0.997285	25.6511	0.00371299	114.78	68.057	100.07	0.983124	17.6533	0.00589468	114.72	0.996064	24.0322	0.00594835	107.43	0.995258	23.2198	0.0119792	100.07	0.978584	16.5985	0.0119792	100.07	0.959276	13.7209	0.0146631	68.422	0.979792	16.856	0.020804	81.635	0	0		NaN	0.978584	16.5985	0.0135222	86.866	0.958426	13.6274	0.020804	74.415	0.988255
P02994	178	P02994	P02994	Elongation factor 1-alpha	TEF1		1	76.6704	0.00604729	86.086	23.369	77.748	0	0		NaN	0	0		NaN	0	0		NaN	0	0		NaN	1	76.6704	0.0504873	77.748	0	0		NaN	0	0		NaN	0	0		NaN	0	0		NaN	0
P02994	55	P02994	P02994	Elongation factor 1-alpha	TEF1		1	82.6689	0.000608407	87.026	74.593	87.026	0.999997	54.7428	0.0130007	65.5	0.999823	37.5181	0.0257211	40.496	0.999999	61.3709	0.00756958	72.2	1	69.7109	0.00374404	74.162	0	0		NaN	0	0		NaN	0	0		NaN	0.999962	44.2243	0.0191352	44.511	0	0		NaN	0
P02994	62	P02994	P02994	Elongation factor 1-alpha	TEF1		0.995053	23.0353	0.00126416	78.516	56.279	62.582	0	0		NaN	0	0		NaN	0	0		NaN	0	0		NaN	0	0		NaN	0	0		NaN					0	0		NaN	0	0		NaN	0
P02994	328	P02994	P02994	Elongation factor 1-alpha	TEF1		1	69.2172	1.91267e-12	110.44	89.485	79.81	0.999984	47.9801	2.0282e-09	96.414	0.99999	50.1261	2.34897e-09	95.067	1	66.4726	1.54576e-09	98.439	0.999711	35.3964	1.27152e-06	83.633	1	63.2354	5.44868e-05	73.156	0.999996	54.1125	1.38888e-05	80.706	0.999274	31.3864	2.19903e-05	78.932	0.99493	22.9277	0.000798248	61.097	0.999967	44.8297	8.50728e-10	101.36	0.999995
P02994	333	P02994	P02994	Elongation factor 1-alpha	TEF1		0.53068	0.533633	0.00731898	45.864	21.673	45.864									0	0		NaN																					0	0		NaN
P02994	170	P02994	P02994	Elongation factor 1-alpha	TEF1		1	56.0133	8.15739e-13	119.23	101.95	56.013	0.932708	11.4178	0.000807955	53.278	0	0		NaN	1	76.2278	0.00277079	76.228	0	0		NaN	0	0		NaN	0	0		NaN	0	0		NaN	0.993484	21.832	0.000358024	60.528	0	0		NaN
P02994	159	P02994	P02994	Elongation factor 1-alpha	TEF1		1	60.7599	7.2459e-23	157.68	132.75	60.76	1	120.868	7.3478e-07	120.87	1	136.797	3.29595e-06	136.8	1	157.677	3.42688e-09	157.68	1	97.7981	1.39001e-08	107.98	0.999461	32.6845	0.000575953	61.641	0.999988	49.3037	3.55187e-05	89.541	0	0		NaN	0.906027	9.84136	0.00423251	45.863	1	77.9225	4.09449e-05	88.73	1
P02994	64	P02994	P02994	Elongation factor 1-alpha	TEF1		0.635298	2.41039	0.00640211	57.96	50.832	57.96									0	0		NaN	0	0		NaN
P03069	50	P03069	P03069	General control protein GCN4	GCN4		1	119.828	1.17938e-10	144.77	81.205	134.99	1	109.678	3.1968e-08	124.12	1	103.23	9.6322e-06	116.52	1	119.828	1.17938e-10	144.77	1	109.712	1.22482e-07	119.76	1	93.5712	8.72099e-06	103.08	1	81.0881	1.26651e-05	94.767	0.999999	60.7663	0.00459741	69.721					1	74.9408	0.000797157	83.045	0.999994
P03069	58	P03069	P03069	General control protein GCN4	GCN4		1	63.6734	1.60554e-09	78.836	72.112	78.836									1	63.6734	1.60554e-09	78.836	0	0		NaN					0	0		NaN													0
P03870	375	P03870	P03870	Site-specific recombinase Flp	FLP1		1	167.115	1.89148e-244	291.71	232.06	167.12	1	183.853	6.82643e-199	264.59	1	57.5896	4.27697e-220	271.21	1	164.663	1.63933e-198	263.24	1	127.765	3.68896e-198	260.34	1	179.575	2.85354e-142	251.81	1	129.851	1.93618e-142	257.54	1	155.058	7.50754e-127	267.02	1	62.8229	1.63933e-198	263.24	1	181.53	1.05109e-142	245.13	1
P03870	391	P03870	P03870	Site-specific recombinase Flp	FLP1		1	65.3469	7.92454e-05	99.752	82.385	65.347
P03871	117	P03871	P03871	Partitioning protein REP1	REP1		0.858246	7.82075	0.000143357	74.786	45.829	74.786
P03871	68	P03871	P03871	Partitioning protein REP1	REP1		1	49.5276	7.93552e-05	67.43	48.646	49.528					1	53.0592	0.00201441	53.059	1	49.5276	0.00439836	49.528
P03872	226	P03872	P03872	Partitioning protein REP2	REP2		0.982055	17.3818	1.6866e-08	121.6	89.349	121.6	0	0		NaN	0	0		NaN	0.5	0	0.000141151	60.768					0.5	0	0.00201165	46.159	0.5	0	0.015318	57.836	0	0		NaN					0	0		NaN	0.5
P03872	227	P03872	P03872	Partitioning protein REP2	REP2		0.604303	1.83891	6.58623e-13	132.78	101.89	132.78	0	0		NaN	0	0		NaN	0.5	0	0.000141151	60.768					0.5	0	0.00201165	46.159	0.5	0	0.015318	57.836	0	0		NaN					0	0		NaN	0.5
P03872	124	P03872	P03872	Partitioning protein REP2	REP2		0.962358	14.0766	1.5299e-74	166.45	121.38	166.45
P03872	130	P03872	P03872	Partitioning protein REP2	REP2		0.999922	41.0986	0.000500363	70.056	30.434	70.056	0	0		NaN	0	0		NaN	0	0		NaN	0	0		NaN	0	0		NaN					0	0		NaN									0
P03872	272	P03872	P03872	Partitioning protein REP2	REP2		0.99996	44.0212	1.47426e-11	123.72	111.7	93.237	0.996607	24.6795	3.05044e-06	97.836	0.995912	23.8672	0.000556152	62.378	0.99873	28.9568	7.66254e-06	84.842					0.997728	26.4257	9.4161e-05	79.022	0.99586	23.8122	0.000276637	71.344	0.999233	31.1498	0.000102192	77.562	0.999491	32.9323	0.00135101	63.894	0.999539	33.3628	0.000127411	79.771	0.998445
P03872	8	P03872	P03872	Partitioning protein REP2	REP2		0.999999	58.5825	5.85774e-69	220.25	195.96	204.69	0.999931	41.6399	3.19347e-68	206.11	0.999991	50.3443	1.66227e-55	192.3	0.999999	58.5825	3.97403e-68	204.69	0.999338	31.787	1.19442e-22	150.94	0.999939	42.129	5.85774e-69	210.87	0.999921	41.046	1.14549e-35	183	0.99993	41.5604	1.26225e-35	169.58	0.999906	40.2661	2.93076e-23	160.36	0.999841	37.9741	1.23771e-29	196.76	0.999921
P03872	13	P03872	P03872	Partitioning protein REP2	REP2		0.544962	0.783182	0.00119202	50.284	43.388	50.284
P03872	95	P03872	P03872	Partitioning protein REP2	REP2		0.999995	53.1214	9.18286e-06	70.229	40.311	70.229	0.664643	2.97081	0.0083027	55.549													0	0		NaN					0	0		NaN					0	0		NaN	0
P03872	158	P03872	P03872	Partitioning protein REP2	REP2		0.999996	54.1846	0.00167048	55.469	27.579	55.469
P03872	146	P03872	P03872	Partitioning protein REP2	REP2		0.995803	23.7519	4.73073e-06	119.69	97.871	49.483
P03872	148	P03872	P03872	Partitioning protein REP2	REP2		0.536406	0.633564	0.00159349	50.563	38.647	50.563
P03872	92	P03872	P03872	Partitioning protein REP2	REP2		0.99777	26.5064	0.00107286	76.221	66.217	76.221	0	0		NaN					0.970911	15.2344	0.0101773	52.579					0	0		NaN					0	0		NaN	0.922515	10.7576	0.00744056	56.916	0	0		NaN	0
P03962	7	P03962	P03962	Orotidine 5'-phosphate decarboxylase	URA3		0.999967	44.8191	0.00115762	54.234	36.096	54.234	0.999967	44.8191	0.00115762	54.234													0	0		NaN													0	0		NaN
P04037	142	P04037	P04037	Cytochrome c oxidase subunit 4, mitochondrial	COX4		1	54.9735	0.000756463	54.974	49.431	54.974	0	0		NaN													0	0		NaN																	0
P04037	84	P04037	P04037	Cytochrome c oxidase subunit 4, mitochondrial	COX4		0.999456	32.6387	0.000557539	60.489	50.417	60.489													0.999456	32.6387	0.000557539	60.489													0	0		NaN
P04037	52	P04037	P04037	Cytochrome c oxidase subunit 4, mitochondrial	COX4		1	92.9251	3.41322e-53	128.39	117.45	92.925	1	90.6531	5.13633e-05	90.653
P04046	497	P04046	P04046	Amidophosphoribosyltransferase	ADE4		1	95.6505	9.68583e-07	95.651	84.38	95.651	0	0		NaN	0	0		NaN	0	0		NaN	1	95.6505	9.68583e-07	95.651	0	0		NaN													0	0		NaN
P04050	1487	P04050	P04050	DNA-directed RNA polymerase II subunit RPB1	RPO21		1	68.5357	0.000111348	96.604	71.351	68.536	0	0		NaN	1	55.3143	0.0291262	55.314	1	77.5969	0.00244686	77.597																					1	81.5247	0.00122454	81.525	0
P04076	71	P04076	P04076	Argininosuccinate lyase	ARG4		0.983872	17.8536	8.59282e-05	79.974	38.65	61.161	0.870173	8.26239	0.00236803	58.37	0	0		NaN	0.873345	8.38564	0.00013754	76.943	0.97334	15.6241	8.59282e-05	79.974					0.851996	7.60165	0.000746111	67.704
P04076	72	P04076	P04076	Argininosuccinate lyase	ARG4		0.570982	1.24146	0.00143122	76.465	38.172	51.436					0	0		NaN	0	0		NaN
P04147	568	P04147	P04147	Polyadenylate-binding protein, cytoplasmic and nuclear	PAB1		0.546877	0.816736	0.00270006	57.836	51.255	57.836																													0	0		NaN
P04386	2	P04386	P04386	Regulatory protein GAL4	GAL4		1	187.329	1.68392e-69	202.01	171.86	202.01																	0	0		NaN	0	0		NaN													0
P04386	708	P04386	P04386	Regulatory protein GAL4	GAL4		0.999987	49.0017	2.65981e-30	124.81	111.58	122.04																																	0	0		NaN
P04449	137	P04449	P04449	60S ribosomal protein L24-A	RPL24A		0.995173	23.1419	1.83606e-05	82.171	69.674	62.408	0.969525	15.0261	0.0185065	45.915					0.982613	17.5215	0.000784485	66.262	0.98362	17.785	0.00058989	68.069	0	0		NaN					0.811199	6.33122	0.0101556	44.299	0.977684	16.4158	0.00383227	66.262	0.958579	13.6441	0.0111618	53.798	0
P04449;P24000	91;91	P04449;P24000	P04449	60S ribosomal protein L24-A;60S ribosomal protein L24-B	RPL24A;RPL24B		1	61.7317	0.00088955	61.732	50.04	61.732					0	0		NaN	0	0		NaN	0	0		NaN	0	0		NaN	0	0		NaN	0	0		NaN	1	45.3301	0.00847568	45.33	0	0		NaN
P04449;P24000	97;97	P04449;P24000	P04449	60S ribosomal protein L24-A;60S ribosomal protein L24-B	RPL24A;RPL24B		0.999999	60.0601	0.00290894	65.719	56.715	65.719	0	0		NaN	0	0		NaN	0	0		NaN	0.999906	40.2687	0.00670025	48.998	0	0		NaN					0	0		NaN	0	0		NaN	0	0		NaN
P04449;P24000	149;149	P04449;P24000	P04449	60S ribosomal protein L24-A;60S ribosomal protein L24-B	RPL24A;RPL24B		1	45.257	3.40483e-23	161.63	153.1	45.257	1	51.2862	2.53388e-05	113.63	1	82.7494	2.57969e-05	108.67	1	71.3491	3.4683e-05	112.13	1	68.8931	7.36474e-05	103.7	1	79.1482	9.40771e-05	100.48	1	90.1082	2.25995e-05	92.866	1	111.652	5.69171e-06	111.65	1	56.5631	0.00226923	87.913	1	100.477	1.97361e-05	100.48	1
P04449;P24000	69;69	P04449;P24000	P04449	60S ribosomal protein L24-A;60S ribosomal protein L24-B	RPL24A;RPL24B		0.877936	8.56877	2.33245e-05	104.37	53.03	75.738	0	0		NaN	0	0		NaN	0	0		NaN	0	0		NaN	0	0		NaN	0	0		NaN	0	0		NaN	0	0		NaN	0	0		NaN	0
P04449;P24000	41;41	P04449;P24000	P04449	60S ribosomal protein L24-A;60S ribosomal protein L24-B	RPL24A;RPL24B		0.982738	17.5535	0.00173387	73.985	53.465	73.985													0	0		NaN
P04449	2	P04449	P04449	60S ribosomal protein L24-A	RPL24A		1	155.857	3.81094e-19	155.86	133.62	155.86	0	0		NaN					0	0		NaN	0	0		NaN																	0	0		NaN
P04449;P24000	144;144	P04449;P24000	P04449	60S ribosomal protein L24-A;60S ribosomal protein L24-B	RPL24A;RPL24B		0.999998	56.1369	0.00248787	71.342	58.135	70.912	0	0		NaN	0	0		NaN	0	0		NaN	0.999981	47.145	0.00620399	57.559	0	0		NaN	0	0		NaN					0.999998	56.1369	0.0138235	70.912	0	0		NaN
P04449;P24000	44;44	P04449;P24000	P04449	60S ribosomal protein L24-A;60S ribosomal protein L24-B	RPL24A;RPL24B		0.677173	3.2173	0.000626978	88.948	64.025	88.948													0	0		NaN
P04449;P24000	77;77	P04449;P24000	P04449	60S ribosomal protein L24-A;60S ribosomal protein L24-B	RPL24A;RPL24B		1	78.8255	5.8649e-10	95.666	69.231	84.035					0	0		NaN					0	0		NaN	0	0		NaN	0	0		NaN	0	0		NaN	0	0		NaN	0	0		NaN
P04456	25	P04456	P04456	60S ribosomal protein L25	RPL25		1	74.7637	2.65866e-07	99.941	94.047	99.941									0	0		NaN	0.999848	38.1872	0.00596634	49.627	0	0		NaN					0	0		NaN	0.999998	56.4831	0.00040033	69.602					0
P04456	36	P04456	P04456	60S ribosomal protein L25	RPL25		0.999594	33.911	2.45104e-05	85.457	74.018	85.457	0	0		NaN					0	0		NaN	0	0		NaN	0	0		NaN					0	0		NaN	0	0		NaN	0	0		NaN	0
P04456	6	P04456	P04456	60S ribosomal protein L25	RPL25		0.999681	34.9631	0.000387484	73.985	57.43	73.985	0	0		NaN	0	0		NaN									0	0		NaN	0	0		NaN	0	0		NaN									0
P04456	100	P04456	P04456	60S ribosomal protein L25	RPL25		1	113.497	9.78093e-09	121.04	102.58	121.04	1	95.9051	6.29189e-07	112.13	1	67.1723	8.57656e-06	83.397	0	0		NaN	1	87.6933	2.42423e-06	90.731	1	93.1946	1.11353e-06	109.42	1	92.6789	1.20569e-06	108.9	1	92.4428	1.24787e-06	108.67					1	79.0446	3.1339e-06	94.616	1
P04456	61	P04456	P04456	60S ribosomal protein L25	RPL25		1	91.637	9.19653e-43	175.33	156.28	91.637	1	103.17	3.11164e-18	114.34	1	90.4533	3.16066e-33	138.3	1	83.2132	3.23147e-33	138.07	1	45.6082	2.60183e-18	114.55	1	90.7179	9.19653e-43	175.33	1	77.0799	1.06274e-23	121.44	1	95.6659	8.35921e-24	122.49	1	85.1462	1.37517e-09	85.146	1	95.6659	7.12443e-31	127.5	1
P04456	74	P04456	P04456	60S ribosomal protein L25	RPL25		0.926454	11.0026	2.5213e-10	138.02	106.7	138.02	0	0		NaN	0.5	0	0.000288943	83	0	0		NaN	0.523955	0.416459	0.000430878	59.248	0.5	0	0.0374835	45.973	0.5	0	0.000403345	59.607	0.5	0	0.0312247	47.261	0.5	0	0.00243766	47.666	0.5	0	0.0183414	47.261	0.5
P04456	75	P04456	P04456	60S ribosomal protein L25	RPL25		0.582718	1.45028	2.83067e-27	152.99	145.93	152.99	0.575587	1.32323	6.88225e-17	132.86	0.582718	1.45028	2.83067e-27	152.99	0.568086	1.19016	9.62498e-17	131.26	0.573348	1.28344	1.0741e-13	124.3	0.562934	1.0991	4.15071e-13	119.01	0.565528	1.14492	1.36693e-16	128.9	0.573348	1.28344	1.0741e-13	124.3	0.580154	1.40454	2.28639e-21	136.99	0.562695	1.09488	1.4786e-09	111.39	0.557878
P04456	89	P04456	P04456	60S ribosomal protein L25	RPL25		0.958313	13.6151	2.36733e-18	133.86	118.6	133.86													0	0		NaN													0.860269	7.89342	0.000371274	76.713
P04456	92	P04456	P04456	60S ribosomal protein L25	RPL25		0.652603	2.73824	0.000568041	71.558	65.142	71.558													0.652603	2.73824	0.000568041	71.558
P04456	45	P04456	P04456	60S ribosomal protein L25	RPL25		1	75.293	1.3077e-07	126.71	103.33	98.033	1	73.3692	1.3077e-07	126.71	1	73.2859	4.36898e-06	119.53	0.999999	61.0808	1.3077e-07	126.71	1	66.7655	2.22931e-05	110.84	1	69.1204	4.23667e-05	112.83	1	75.293	2.37976e-05	110.39	0.999997	55.4711	4.68827e-05	100.88	0.999998	57.1501	3.56008e-05	106.4	0.999999	59.7997	4.42424e-05	110.84	1
P04456	49	P04456	P04456	60S ribosomal protein L25	RPL25		0.999997	55.2927	0.000281415	71.692	61.033	71.692	0.999882	39.2633	0.00588547	43.297	0	0		NaN	0	0		NaN	0	0		NaN	0.99979	36.7674	0.00721081	40.801	0.999978	46.5126	0.00150326	53.403	0	0		NaN	0	0		NaN					0
P04456	39	P04456	P04456	60S ribosomal protein L25	RPL25		0.999936	41.9163	0.0015435	66.692	57.929	66.692	0.999019	30.0794	0.00837607	54.416	0.994618	22.667	0.0173745	44.753	0.999442	32.5312	0.00752886	48.423	0	0		NaN	0.998789	29.1631	0.0100735	47.603	0.973051	15.576	0.0129437	40.352					0	0		NaN	0.999308	31.5987	0.0121971	49.418	0.999018
P04786	125	P04786	P04786	DNA topoisomerase 1	TOP1		1	155.598	5.93703e-19	160.59	132.19	160.59	1	155.598	5.93703e-19	160.59	1	120.909	1.63814e-05	126.07	1	111.057	0.0002897	111.06	1	129.615	4.71219e-06	129.85	1	81.3376	0.00437369	81.338	1	74.67	0.00583587	75.197	0	0		NaN					1	111.057	0.0002897	111.06	1
P04786	657	P04786	P04786	DNA topoisomerase 1	TOP1		1	74.1251	8.99879e-24	162.41	110.64	162.41	0	0		NaN	0	0		NaN					0.999719	35.5097	3.06763e-06	97.797	0	0		NaN	0	0		NaN	0	0		NaN	0	0		NaN	0	0		NaN	0
P04786	675	P04786	P04786	DNA topoisomerase 1	TOP1		0.99997	45.1853	0.00513729	50.284	29.413	50.284									0	0		NaN
P04786	91	P04786	P04786	DNA topoisomerase 1	TOP1		0.96953	15.8754	0.000371716	83.862	61.869	78.342
P04786	596	P04786	P04786	DNA topoisomerase 1	TOP1		0.953637	13.1321	0.000855049	71.806	37.305	71.806
P04786	644	P04786	P04786	DNA topoisomerase 1	TOP1		0.989796	19.8691	7.27665e-05	89.466	82.335	58.268	0.609975	1.94219	7.27665e-05	89.466	0.499993	0	0.0207593	45.434	0.580528	1.41119	0.00118811	71.692	0	0		NaN
P04786	647	P04786	P04786	DNA topoisomerase 1	TOP1		0.910942	10.0986	0.000177804	88.507	75.952	54.7					0.499993	0	0.0207593	45.434					0	0		NaN
P04786	535	P04786	P04786	DNA topoisomerase 1	TOP1		0.998535	28.3339	1.00543e-05	87.411	79.224	77.871	0.85765	7.79953	0.00517484	40.349					0.998535	28.3339	1.00543e-05	77.871					0.971231	15.2839	0.000447186	63.337	0.921228	10.68	0.00179929	48.907					0	0		NaN	0	0		NaN	0
P04806;P04807	13;13	P04806	P04806	Hexokinase-1;Hexokinase-2	HXK1;HXK2		0.887951	8.99677	0.00525559	43.382	28.351	43.382									0	0		NaN	0	0		NaN													0	0		NaN					0
P04806	148	P04806	P04806	Hexokinase-1	HXK1		1	104.829	4.28028e-21	112.36	97.108	112.36
P04806	410	P04806	P04806	Hexokinase-1	HXK1		1	111.851	2.46992e-16	121.27	107.36	121.27	0.999952	43.172	0.00632225	46.892					0.999937	42.0036	0.00420025	45.723	0	0		NaN													0	0		NaN
P04806;P04807	7;7	P04806	P04806	Hexokinase-1;Hexokinase-2	HXK1;HXK2		0.860263	8.5219	0.00193081	54.259	33.878	48.44									0	0		NaN	0	0		NaN													0	0		NaN
P04911;P04912	14;14	P04911;P04912	P04911	Histone H2A.1;Histone H2A.2	HTA1;HTA2		1	100.413	6.93556e-42	188.13	169.82	188.13	0.997979	26.9365	0.000158944	69.602	0.99998	46.944	2.10867e-09	109.83	0.999806	37.1192	1.5705e-05	84.365	1	77.6437	1.4494e-41	173.06	0.999818	37.4069	4.82053e-07	97.551	0.99994	42.2093	5.93196e-07	96.734	0.999991	50.5227	1.87506e-13	123.02	1	83.1627	6.93556e-42	176.56	0.999955	43.4722	4.92268e-13	120.14	0.999675
P04911;P04912	22;22	P04911;P04912	P04911	Histone H2A.1;Histone H2A.2	HTA1;HTA2		0.601159	1.78189	0.00494507	43.991	28.96	43.991	0	0		NaN	0	0		NaN	0	0		NaN	0	0		NaN	0	0		NaN	0	0		NaN	0	0		NaN					0	0		NaN	0
P04911	127	P04911	P04911	Histone H2A.1	HTA1		1	161.898	7.98631e-48	198.07	7.9897	161.9	1	164.971	5.8126e-19	164.97	1	164.971	5.8126e-19	169.76	1	157.677	8.0757e-14	160.53	1	137.976	8.73888e-08	159.79	1	190.084	8.91004e-19	190.08	1	179.21	5.23786e-28	179.21	1	179.21	5.23786e-28	179.21	1	177.778	3.87562e-27	177.78	1	152.54	1.50705e-12	152.54	1
P04911;P04912	77;77	P04911;P04912	P04911	Histone H2A.1;Histone H2A.2	HTA1;HTA2		0.999927	41.3843	0.00116152	78.653	78.653	45.047					0	0		NaN	0	0		NaN	0	0		NaN	0.545741	0.79683	0.0210617	40.715									0	0		NaN	0.552221	0.910496	0.0136251	49.35	0
P04911;P04912	76;76	P04911;P04912	P04911	Histone H2A.1;Histone H2A.2	HTA1;HTA2		0.901415	9.61112	0.000274403	91.549	75.351	58.592					0	0		NaN					0	0		NaN	0	0		NaN									0.874584	8.43447	0.00159538	75.819	0.842308	7.27663	0.0139433	48.981
P04911;P04912	120;120	P04911;P04912	P04911	Histone H2A.1;Histone H2A.2	HTA1;HTA2		0.5	0	2.61209e-29	134.07	118.98	97.488	0.5	0	2.61209e-29	134.07
P04911;P04912	121;121	P04911;P04912	P04911	Histone H2A.1;Histone H2A.2	HTA1;HTA2		0.5	0	2.61209e-29	134.07	118.98	97.488	0.5	0	2.61209e-29	134.07
P04911	124	P04911	P04911	Histone H2A.1	HTA1		1	119.049	2.84251e-77	228.17	27.075	211.83	0.999821	38.0791	0.0306242	46.592	0.999708	35.6639	0.0102805	66.393	0.999997	54.7964	0.000583437	81.494	0	0		NaN	1	79.1978	8.18529e-17	153.81	1	99.5039	1.33471e-22	164.68	1	93.9796	1.45598e-16	179.5	0.999999	59.6327	7.4711e-05	127.02	1	109.787	8.96148e-50	214.72	1
P04912	124	P04912	P04912	Histone H2A.2	HTA2		1	125.118	1.00271e-76	214.42	39.7	214.42	0	0		NaN	0	0		NaN	0	0		NaN	0	0		NaN	1	64.5279	0.000164726	104.24	1	84.8613	6.96367e-09	128.54	1	81.3576	7.65018e-08	130.1	0.999985	48.5821	0.00667096	73.435	1	101.976	2.6226e-62	201.48	1
P04912	127	P04912	P04912	Histone H2A.2	HTA2		1	136.023	2.61844e-47	190.93	10.583	136.02	1	154.241	1.32311e-36	186.3	1	124.669	7.18915e-13	157.58	1	139.153	1.89373e-36	184.49	0	0		NaN	1	149.228	3.56081e-19	163.9	1	136.023	2.28656e-13	156.51	1	136.023	6.81485e-19	159.2	1	157.663	1.70354e-13	159.83	1	155.115	2.61844e-47	190.93	1
P05319	2	P05319	P05319	60S acidic ribosomal protein P2-alpha	RPP2A		1	93.0755	2.13665e-10	95.5	71.459	95.5	1	88.1774	2.13665e-10	91.64	0.999989	49.778	0.000361011	56.766	0	0		NaN					0	0		NaN	0	0		NaN	0	0		NaN	0	0		NaN	0	0		NaN
P05737	21	P05737	P05737	60S ribosomal protein L7-A	RPL7A		0.99991	40.4762	0.00498896	44.196	32.403	44.196									0.99991	40.4762	0.00498896	44.196	0.999731	35.6992	0.0061401	41.967	0	0		NaN	0	0		NaN	0	0		NaN	0	0		NaN
P05737	34	P05737	P05737	60S ribosomal protein L7-A	RPL7A		0.865567	8.08796	0.00028466	69.729	58.45	69.729					0	0		NaN	0.856229	7.74919	0.000569912	60.918	0	0		NaN	0	0		NaN	0	0		NaN	0	0		NaN	0	0		NaN					0
P05737;Q12213	66;66	P05737;Q12213	P05737	60S ribosomal protein L7-A;60S ribosomal protein L7-B	RPL7A;RPL7B		0.989427	19.7117	0.000995103	65.805	54.592	42.568									0	0		NaN	0	0		NaN	0	0		NaN									0	0		NaN	0	0		NaN
P05737;Q12213	70;70	P05737;Q12213	P05737	60S ribosomal protein L7-A;60S ribosomal protein L7-B	RPL7A;RPL7B		0.999997	55.1685	0.00091846	58.83	52.708	58.83					0	0		NaN	0.999995	53.0823	0.00133006	55.011	0	0		NaN	0	0		NaN					0	0		NaN	0	0		NaN	0	0		NaN
P05737;Q12213	238;238	P05737;Q12213	P05737	60S ribosomal protein L7-A;60S ribosomal protein L7-B	RPL7A;RPL7B		0.975061	15.9214	0.00032115	71.697	47.287	62.813
P05737	14	P05737	P05737	60S ribosomal protein L7-A	RPL7A		0.988229	19.2406	1.39306e-05	113.22	96.194	79.148	0.978349	16.5502	0.000572292	69.276	0.977995	16.4781	0.011637	50.353	0.98279	17.5667	0.000485915	70.056	0.86367	8.01756	0.00493962	50.353	0	0		NaN									0.933148	11.4484	3.99589e-05	87.913
P05737	15	P05737	P05737	60S ribosomal protein L7-A	RPL7A		0.560129	1.04962	0.00100683	65.347	49.034	65.347																	0	0		NaN
P05737;Q12213	158;158	P05737;Q12213	P05737	60S ribosomal protein L7-A;60S ribosomal protein L7-B	RPL7A;RPL7B		0.999362	31.95	0.0049021	54.355	35.532	54.355
P05737;Q12213	219;219	P05737;Q12213	P05737	60S ribosomal protein L7-A;60S ribosomal protein L7-B	RPL7A;RPL7B		0.989338	19.6752	0.00125861	67.952	42.754	67.952
P05737;Q12213	53;53	P05737;Q12213	P05737	60S ribosomal protein L7-A;60S ribosomal protein L7-B	RPL7A;RPL7B		1	41.5399	0.00218468	57.188	38.177	41.54																													0	0		NaN
P05737	38	P05737	P05737	60S ribosomal protein L7-A	RPL7A		0.537855	0.658877	0.000459867	63.037	58.489	63.037					0	0		NaN					0	0		NaN					0	0		NaN					0	0		NaN					0
P05737;Q12213	121;121	P05737;Q12213	P05737	60S ribosomal protein L7-A;60S ribosomal protein L7-B	RPL7A;RPL7B		0.999997	55.2511	0.00243844	58.37	39.127	58.37									0	0		NaN	0	0		NaN																					0
P05738;P51401	110;110	P05738;P51401	P05738	60S ribosomal protein L9-A;60S ribosomal protein L9-B	RPL9A;RPL9B		0.995973	25.0423	0.00733984	58.723	37.941	58.723
P05738;P51401	121;121	P05738;P51401	P05738	60S ribosomal protein L9-A;60S ribosomal protein L9-B	RPL9A;RPL9B		0.993651	21.9456	1.02039e-06	103.44	78.676	103.44					0	0		NaN	0.56292	1.09885	0.00215933	51.774									0.566054	1.15422	0.00903182	52.928					0.574258	1.29961	0.00534795	45.915	0	0		NaN
P05738;P51401	122;122	P05738;P51401	P05738	60S ribosomal protein L9-A;60S ribosomal protein L9-B	RPL9A;RPL9B		1	51.2109	0.00150949	59.898	34.963	51.211	1	50.5625	0.00461948	50.563	0	0		NaN	0	0		NaN					0	0		NaN	0	0		NaN	0	0		NaN	0	0		NaN	0	0		NaN	0
P05738;P51401	174;174	P05738;P51401	P05738	60S ribosomal protein L9-A;60S ribosomal protein L9-B	RPL9A;RPL9B		1	65.964	0.000387702	87.824	65.433	87.824	0.999933	41.7552	0.0187655	43.69																									0.999999	59.0001	0.0348246	59.862	0.999943	42.4485	0.0159837	45.207
P05738;P51401	141;141	P05738;P51401	P05738	60S ribosomal protein L9-A;60S ribosomal protein L9-B	RPL9A;RPL9B		1	91.0686	0.000578945	140.63	97.458	91.069	1	114.202	0.00428312	114.2	0	0		NaN	1	134.478	0.00118495	134.48	1	97.4306	0.00693676	97.431	1	125.469	0.00272329	125.47	0	0		NaN	1	105.935	0.0043273	105.94					1	140.633	0.000578945	140.63	0
P05738	21	P05738	P05738	60S ribosomal protein L9-A	RPL9A		0.99916	30.7547	0.000108466	92.19	67.352	92.19	0	0		NaN	0	0		NaN					0.951023	12.882	0.00286198	67.08	0	0		NaN	0	0		NaN					0.998987	29.9402	0.00112483	75.819	0	0		NaN
P05738	26	P05738	P05738	60S ribosomal protein L9-A	RPL9A		0.999995	53.3736	0.00012389	72.175	47.454	70.26	0.999769	36.3635	0.00410281	50.305	0	0		NaN	0.999995	53.3736	0.000247943	70.26					0	0		NaN	0	0		NaN	0	0		NaN					0	0		NaN	0
P05738	2	P05738	P05738	60S ribosomal protein L9-A	RPL9A		1	74.9442	0.000728704	74.944	59.742	74.944	0	0		NaN					1	74.9442	0.000728704	74.944																					1	64.4386	0.00460485	64.439
P05738;P51401	39;39	P05738;P51401	P05738	60S ribosomal protein L9-A;60S ribosomal protein L9-B	RPL9A;RPL9B		1	74.162	8.78482e-06	97.911	76.153	97.911	0.999999	62.4727	0.00141024	77.674	0.999993	51.7052	0.00794094	66.267	0	0		NaN	0.999997	54.6315	0.00279349	68.44	0.999998	57.729	0.000135057	72.29					0	0		NaN	1	69.4133	0.000440157	84.289	0.999999	59.8063	8.78482e-06	83.182	0
P05738;P51401	84;84	P05738;P51401	P05738	60S ribosomal protein L9-A;60S ribosomal protein L9-B	RPL9A;RPL9B		0.973742	15.6918	0.000377869	78.069	53.654	78.069	0	0		NaN					0	0		NaN					0	0		NaN									0.858338	7.82404	0.000806394	63.037	0	0		NaN
P05738;P51401	89;89	P05738;P51401	P05738	60S ribosomal protein L9-A;60S ribosomal protein L9-B	RPL9A;RPL9B		0.999999	58.6187	0.000647658	67.902	44.586	67.902
P05739	131	P05739	P05739	60S ribosomal protein L6-B	RPL6B		1	71.9199	2.57969e-05	82.749	23.504	82.749													0	0		NaN													0	0		NaN	0	0		NaN
P46990;P05740	86;86	P46990	P46990	60S ribosomal protein L17-B;60S ribosomal protein L17-A	RPL17B;RPL17A		0.993075	21.5655	0.00753742	47.187	31.927	47.187																																	0	0		NaN
P46990;P05740	89;89	P46990	P46990	60S ribosomal protein L17-B;60S ribosomal protein L17-A	RPL17B;RPL17A		1	80.7679	1.38746e-07	92.39	65.362	92.39	0	0		NaN									0.998963	29.8393	0.00846095	45.094					0.999783	36.644	0.00324788	42.172					0.999655	34.6255	0.0104394	43.12	0	0		NaN
P46990;P05740	105;105	P46990	P46990	60S ribosomal protein L17-B;60S ribosomal protein L17-A	RPL17B;RPL17A		0.980638	17.0456	0.00189251	59.356	39.866	55.988	0	0		NaN
P46990;P05740	111;111	P46990	P46990	60S ribosomal protein L17-B;60S ribosomal protein L17-A	RPL17B;RPL17A		1	68.9838	0.000280201	73.252	48.228	73.252
P46990;P05740	43;43	P46990	P46990	60S ribosomal protein L17-B;60S ribosomal protein L17-A	RPL17B;RPL17A		0.984029	17.8967	9.89018e-08	106.57	106.57	58.848					0	0		NaN									0.836355	7.08488	3.48809e-06	88.264													0.5	0	0.00244906	44.816
P46990;P05740	46;46	P46990	P46990	60S ribosomal protein L17-B;60S ribosomal protein L17-A	RPL17B;RPL17A		0.5	0	0.00244906	44.816	40.106	44.816					0	0		NaN																									0.5	0	0.00244906	44.816
P05744;P41056	10;10	P05744;P41056	P05744	60S ribosomal protein L33-A;60S ribosomal protein L33-B	RPL33A;RPL33B		0.977471	16.3736	6.37317e-05	77.379	70.009	47.559					0	0		NaN	0.862531	7.97571	0.0145301	47.894	0.875877	8.4859	6.37317e-05	77.379	0.977471	16.3736	0.00785075	47.559	0.890341	9.09511	0.00278034	57.836	0	0		NaN	0	0		NaN
P05744;P41056	12;12	P05744;P41056	P05744	60S ribosomal protein L33-A;60S ribosomal protein L33-B	RPL33A;RPL33B		0.562678	1.09459	0.00592419	50.284	46.407	50.284					0.546169	0.804333	0.0127791	40.589	0	0		NaN	0	0		NaN									0	0		NaN	0	0		NaN	0.562678	1.09459	0.00592419	50.284
P05744;P41056	57;57	P05744;P41056	P05744	60S ribosomal protein L33-A;60S ribosomal protein L33-B	RPL33A;RPL33B		1	61.3533	0.00563354	61.353	34.567	61.353	0	0		NaN	0	0		NaN	0	0		NaN	0	0		NaN	0	0		NaN					0	0		NaN	0	0		NaN	0	0		NaN	0
P05744	31	P05744	P05744	60S ribosomal protein L33-A	RPL33A		1	44.5108	1.35333e-100	196.02	192.56	44.511	1	67.0225	1.5284e-06	105.65	1	90.7309	2.45729e-13	92.833	1	112.748	7.38938e-23	112.75	1	76.1427	6.54528e-07	76.143	1	81.865	8.7804e-08	124.12	1	77.379	3.5528e-06	104.24	1	63.6242	8.96704e-06	101.39	1	89.4303	5.72295e-05	89.43	1	110.801	1.05884e-06	110.8	1
P05747	44	P05747	P05747	60S ribosomal protein L29	RPL29		1	139.199	2.20901e-13	148.52	114.09	148.52	0	0		NaN					0	0		NaN	0	0		NaN	0	0		NaN	0	0		NaN					1	123.03	3.88024e-11	124.3					0
P05747	52	P05747	P05747	60S ribosomal protein L29	RPL29		1	71.0828	2.87475e-11	126.34	114.37	126.34													0.997843	26.653	0.00729312	40.066	0	0		NaN	0	0		NaN	0.999266	31.3383	0.00395607	52.071	0.999889	39.5282	0.000642402	66.498	0.999398	32.2019	0.00354589	53.448	0
P05748;P54780	184;184	P05748	P05748	60S ribosomal protein L15-A;60S ribosomal protein L15-B	RPL15A;RPL15B		0.5	0	0.00305247	56.258	36.987	56.258					0	0		NaN													0	0		NaN					0	0		NaN
P05748;P54780	189;189	P05748	P05748	60S ribosomal protein L15-A;60S ribosomal protein L15-B	RPL15A;RPL15B		0.5	0	0.00305247	56.258	36.987	56.258					0	0		NaN													0	0		NaN					0	0		NaN
P05748;P54780	83;83	P05748	P05748	60S ribosomal protein L15-A;60S ribosomal protein L15-B	RPL15A;RPL15B		1	66.5955	0.00700409	66.595	44.509	66.595	0	0		NaN	1	52.7897	0.0412901	52.79	1	52.7897	0.0412901	52.79	0	0		NaN	1	51.2675	0.0465159	51.268					0	0		NaN	0	0		NaN	0	0		NaN
P05748	5	P05748	P05748	60S ribosomal protein L15-A	RPL15A		1	64.3391	0.000623475	78.692	59.947	78.692
P05748	14	P05748	P05748	60S ribosomal protein L15-A	RPL15A		0.507572	0.131549	0.00321213	56.563	9.6719	56.563
P05750	212	P05750	P05750	40S ribosomal protein S3	RPS3		1	63.8046	7.42239e-27	134.81	125.81	97.713	0.999917	40.8132	1.13195e-08	86.987	0.999993	51.5826	8.18268e-21	107.08	0.999994	52.0432	5.40604e-16	104.53	0.99999	49.9617	9.3241e-09	88.222	0.999881	39.2485	9.36742e-07	76.417	0.999938	42.0876	1.11005e-06	75.112	0	0		NaN					0.999683	34.9871	0.000329293	59.539	0.999603
P05750	78	P05750	P05750	40S ribosomal protein S3	RPS3		0.999909	40.4021	0.000232438	102.61	91.145	45.357					0.558109	1.01404	0.00362008	64.297					0	0		NaN	0	0		NaN	0	0		NaN					0.643314	2.56136	0.000703523	80.239					0
P05756	94	P05756	P05756	40S ribosomal protein S13	RPS13		0.604699	1.84611	6.58508e-07	112.57	80.297	70.268
P05756	27	P05756	P05756	40S ribosomal protein S13	RPS13		1	66.8529	8.74944e-15	97.509	73.111	66.853	1	97.5089	8.74944e-15	97.509	1	54.0722	0.000219689	54.072	1	43.8882	0.00732453	43.888													0.999649	34.5458	0.00196318	41.734									0.999911
P05756	39	P05756	P05756	40S ribosomal protein S13	RPS13		0.999907	40.2951	2.9339e-10	135.02	97.232	85.909
P05756	9	P05756	P05756	40S ribosomal protein S13	RPS13		0.999998	56.3383	0.000365468	64.749	37.62	64.749
P05756	107	P05756	P05756	40S ribosomal protein S13	RPS13		0.99962	34.2051	0.0027992	58.981	58.981	58.981	0.99962	34.2051	0.0027992	58.981	0	0		NaN
P05756	43	P05756	P05756	40S ribosomal protein S13	RPS13		0.624989	2.21829	0.000518562	73.91	40.593	73.91
P05759	149	P05759	P05759	Ubiquitin-40S ribosomal protein S31;Ubiquitin;40S ribosomal protein S31	RPS31		1	77.0577	0.000477631	94.302	93.471	77.058	1	54.7763	0.00368339	54.776	0	0		NaN	1	46.1286	0.00837402	46.129	0	0		NaN	0	0		NaN	0	0		NaN	1	57.5592	0.00210504	62.546	1	40.0672	0.010878	50.607	1	47.067	0.00281506	68.224	0
P05759	136	P05759	P05759	Ubiquitin-40S ribosomal protein S31;Ubiquitin;40S ribosomal protein S31	RPS31		0.718612	4.07189	0.00443284	44.158	16.405	44.158	0.5	0	0.00443284	43.841													0	0		NaN
P05759	143	P05759	P05759	Ubiquitin-40S ribosomal protein S31;Ubiquitin;40S ribosomal protein S31	RPS31		1	81.433	1.27532e-07	106.17	84.941	94.551	0.999996	54.2288	1.43756e-05	84.566	0.999984	47.8326	9.75276e-05	70.889	0.999938	42.0954	6.1403e-07	77.847	0.999714	35.4364	0.00038062	61.167	0.998941	29.7456	8.90735e-05	83.499	0.999958	43.7336	4.02001e-05	80.746	0.999788	36.7346	0.000203219	76.759	0.998334	27.7768	0.000470574	60.401	0.999983	47.6697	5.97886e-06	93.494	0.997391
P05759;P0CG63;P0CH09;P0CH08	63;63;63;63	P05759;P0CH09	P05759	Ubiquitin-40S ribosomal protein S31;Ubiquitin;40S ribosomal protein S31;Polyubiquitin;Ubiquitin;Ubiquitin-60S ribosomal protein L40;Ubiquitin;60S ribosomal protein L40	RPS31;UBI4;RPL40B;RPL40A		1	50.1018	1.11915e-05	82.55	60.709	50.102	0	0		NaN	1	82.5498	1.11915e-05	82.55	1	67.136	0.000689057	67.136					1	60.5499	0.00187665	60.55	1	60.5499	0.00187665	60.55	1	68.9722	0.00049701	68.972					1	45.9924	0.0147634	45.992	1
P05759;P0CG63;P0CH09;P0CH08	48;48;48;48	P05759;P0CH09	P05759	Ubiquitin-40S ribosomal protein S31;Ubiquitin;40S ribosomal protein S31;Polyubiquitin;Ubiquitin;Ubiquitin-60S ribosomal protein L40;Ubiquitin;60S ribosomal protein L40	RPS31;UBI4;RPL40B;RPL40A		1	78.0783	5.70305e-14	103.75	82.439	78.078	1	94.0103	6.18231e-09	94.01	1	82.7066	5.67144e-07	82.707	1	91.6527	1.56952e-13	91.653	1	87.2873	2.18766e-07	87.287	1	78.5008	8.96024e-06	78.501	1	96.6656	4.21875e-10	96.666	1	84.8293	2.96489e-07	84.829	1	75.4626	3.69815e-06	75.463	1	78.2344	6.06319e-08	78.234	1
P05759	107	P05759	P05759	Ubiquitin-40S ribosomal protein S31;Ubiquitin;40S ribosomal protein S31	RPS31		0.999712	35.4111	9.68583e-07	97.551	91.388	97.551	0.996169	24.1507	2.08368e-05	86.291	0	0		NaN	0.996774	24.8997	8.57664e-05	75.462	0.932719	11.4186	0.0014504	50.843	0	0		NaN	0.983589	17.7767	0.000287955	62.287	0.977507	16.3808	0.0139462	46.318	0.992459	21.1928	0.000642777	69.108	0.973044	15.5748	0.000136244	70.889	0
P05759	113	P05759	P05759	Ubiquitin-40S ribosomal protein S31;Ubiquitin;40S ribosomal protein S31	RPS31		0.999743	35.8948	0.000449321	97.431	62.135	96.331	0.999618	34.1723	0.000802078	84.213	0	0		NaN	0.969369	15.0032	0.00234059	61.161	0.772234	5.30259	0.00125979	76.221	0.991646	20.7448	0.00234993	69.423	0.977275	16.3352	0.00111765	78.334	0.879979	8.65214	0.0027639	67.897	0.973642	15.6748	0.00134735	74.92	0.997658	26.2944	0.00094982	93.649	0.991496
P05759;P0CG63;P0CH09;P0CH08	6;6;6;6	P05759;P0CH09	P05759	Ubiquitin-40S ribosomal protein S31;Ubiquitin;40S ribosomal protein S31;Polyubiquitin;Ubiquitin;Ubiquitin-60S ribosomal protein L40;Ubiquitin;60S ribosomal protein L40	RPS31;UBI4;RPL40B;RPL40A		0.999995	52.916	3.82977e-06	111.86	105.91	107.11	0.96717	14.6923	0.0103735	43.991	0.96801	14.8087	0.00993184	44.616	0.999286	31.459	0.000549838	79.82	0.999632	34.345	0.00480997	64.55	0.997446	25.9164	0.000968934	64.55	0.996161	24.1411	0.000549838	68.44	0.964055	14.2846	0.00540846	51.013	0.999803	37.0613	0.00173619	75.695	0.999386	32.115	0.000399733	86.313	0
P05759;P0CG63;P0CH09;P0CH08	11;11;11;11	P05759;P0CH09	P05759	Ubiquitin-40S ribosomal protein S31;Ubiquitin;40S ribosomal protein S31;Polyubiquitin;Ubiquitin;Ubiquitin-60S ribosomal protein L40;Ubiquitin;60S ribosomal protein L40	RPS31;UBI4;RPL40B;RPL40A		1	185.905	3.7561e-89	197.86	176.33	197.86	1	159.368	6.62914e-09	159.37	1	145.723	6.95843e-05	145.72	1	168.797	3.6708e-10	168.8	1	144.089	0.000116673	144.09	1	159.368	6.62914e-09	159.37	1	159.368	6.62914e-09	159.37	1	160.587	5.81994e-09	160.59	1	157.911	1.12475e-07	157.91	1	147.508	1.81696e-05	147.51	1
P05759;P0CG63;P0CH09;P0CH08	27;27;27;27	P05759;P0CH09	P05759	Ubiquitin-40S ribosomal protein S31;Ubiquitin;40S ribosomal protein S31;Polyubiquitin;Ubiquitin;Ubiquitin-60S ribosomal protein L40;Ubiquitin;60S ribosomal protein L40	RPS31;UBI4;RPL40B;RPL40A		0.998727	28.9469	6.85753e-101	273.8	239.55	215.53	0.980993	17.1276	8.48879e-30	198.74	0.9905	20.1813	5.8278e-34	208.46	0.985287	18.2585	5.8831e-35	210.41	0.998238	27.5332	6.14505e-21	179.93	0.995396	23.3487	3.61216e-59	236.69	0.978603	16.6026	6.42408e-85	257.72	0.991344	20.5892	3.31544e-34	202.32	0.807479	6.22653	0.000278752	61.815	0.985744	18.3976	8.30664e-50	228.8	0.990602
P05759;P0CG63;P0CH09;P0CH08	29;29;29;29	P05759;P0CH09	P05759	Ubiquitin-40S ribosomal protein S31;Ubiquitin;40S ribosomal protein S31;Polyubiquitin;Ubiquitin;Ubiquitin-60S ribosomal protein L40;Ubiquitin;60S ribosomal protein L40	RPS31;UBI4;RPL40B;RPL40A		0.744202	4.63793	7.09481e-09	140.3	111.9	140.3	0.593201	1.63823	0.000796972	62.203					0.626409	2.24462	4.3172e-05	82.482	0.597461	1.71502	0.000246024	63.918	0.573297	1.28253	0.00510128	40.52	0.564604	1.1286	0.00414281	49.606					0.744202	4.63793	2.70398e-07	140.3					0.603549
P05759	116	P05759	P05759	Ubiquitin-40S ribosomal protein S31;Ubiquitin;40S ribosomal protein S31	RPS31		1	114.323	1.75248e-14	114.72	102.93	114.72	1	84.0142	1.65213e-08	84.425	1	84.424	1.65213e-08	84.425	1	114.323	1.75248e-14	114.72					0	0		NaN					0	0		NaN					1	82.9744	5.82082e-08	82.975	0
P05759	99	P05759	P05759	Ubiquitin-40S ribosomal protein S31;Ubiquitin;40S ribosomal protein S31	RPS31		1	70.3999	0.000434604	77.662	58.99	77.662	0	0		NaN	0	0		NaN	1	67.8596	0.000434604	72.643	0	0		NaN	0.999913	40.5891	0.0121973	40.589	0	0		NaN	0	0		NaN	0	0		NaN	0.999991	50.6576	0.0570081	54.066	0
P06100	14	P06100	P06100	General negative regulator of transcription subunit 2	CDC36		0.999652	34.5814	6.12568e-05	77.64	59.329	52.247
P06105	1139	P06105	P06105	Protein SCP160	SCP160		0.99746	26.2679	0.00544609	67.019	34.452	67.019
P06169	209	P06169	P06169	Pyruvate decarboxylase isozyme 1	PDC1		0.841736	7.25795	0.00196896	64.394	47.451	64.394
P06169	212	P06169	P06169	Pyruvate decarboxylase isozyme 1	PDC1		0.634821	2.40145	0.000920616	70.332	55.456	70.332
P06169	233	P06169	P06169	Pyruvate decarboxylase isozyme 1	PDC1		0.999998	57.8716	0.00280394	59.606	24.661	59.606
P06169	484	P06169	P06169	Pyruvate decarboxylase isozyme 1	PDC1		1	48.6016	3.82514e-05	91.867	80.92	48.602	1	60.9729	0.0137242	60.973					1	67.9926	0.00589639	67.993	1	45.598	0.000861491	47.018	0	0		NaN					0	0		NaN	0	0		NaN					0
P06169;P26263	562;562	P06169	P06169	Pyruvate decarboxylase isozyme 1;Pyruvate decarboxylase isozyme 3	PDC1;PDC6		1	63.4188	1.32023e-46	225.01	140.98	63.419	1	105.136	0.00213966	113.71	1	79.474	0.0049525	89.698	1	134.478	1.99007e-33	225.01	1	122.187	0.000549521	136.8	1	73.2482	0.00212835	114.5	1	47.5743	0.00398755	83.313	1	105.136	0.0046432	105.14	1	116.25	0.0012711	116.25	1	95.7414	0.00207368	116.25	1
P06169	525	P06169	P06169	Pyruvate decarboxylase isozyme 1	PDC1		0.999998	57.5443	2.12436e-06	106.11	90.223	106.11	0.999824	37.5455	5.99127e-05	74.392	0.998484	28.1871	0.00245168	56.951	0.999998	57.5443	2.12436e-06	106.11	0	0		NaN	0	0		NaN	0.989322	19.6684	0.00759244	55.314	0	0		NaN	0	0		NaN	0.993941	22.15	0.0137274	47.57	0.989787
P06169	228	P06169	P06169	Pyruvate decarboxylase isozyme 1	PDC1		0.5	0	7.23884e-05	61.648	55.655	61.648									0.5	0	7.23884e-05	61.648
P06169	232	P06169	P06169	Pyruvate decarboxylase isozyme 1	PDC1		0.549475	0.86229	7.23884e-05	61.648	55.655	40.52									0.5	0	7.23884e-05	61.648	0.549475	0.86229	0.00466014	40.52
P06169	554	P06169	P06169	Pyruvate decarboxylase isozyme 1	PDC1		1	70.8794	0.00199342	90.15	75.993	90.15									0.999956	43.6045	0.0199746	43.604	0.999992	50.9378	0.0108503	54.259					0	0		NaN
P06169	520	P06169	P06169	Pyruvate decarboxylase isozyme 1	PDC1		0.999216	31.0509	0.00210811	57.525	51.945	57.525					0	0		NaN					0	0		NaN	0	0		NaN
P06169	304	P06169	P06169	Pyruvate decarboxylase isozyme 1	PDC1		0.999999	60.5193	0.000300634	62.042	54.811	62.042	0.999998	56.1873	0.000920128	56.569	0	0		NaN	0	0		NaN	0.999977	46.3268	0.00383659	47.189					0	0		NaN									0	0		NaN
P06367;P39516	70;71	P06367	P06367	40S ribosomal protein S14-A;40S ribosomal protein S14-B	RPS14A;RPS14B		0.849431	7.51394	6.76636e-06	70.917	62.317	52.909					0	0		NaN									0	0		NaN									0	0		NaN	0	0		NaN
P06367;P39516	47;48	P06367	P06367	40S ribosomal protein S14-A;40S ribosomal protein S14-B	RPS14A;RPS14B		0.993048	21.5483	3.9959e-05	76.073	58.057	76.073					0	0		NaN	0	0		NaN	0	0		NaN					0	0		NaN	0	0		NaN					0	0		NaN
P06367;P39516	49;50	P06367	P06367	40S ribosomal protein S14-A;40S ribosomal protein S14-B	RPS14A;RPS14B		1	148.286	1.46995e-38	148.29	129.5	148.29					0	0		NaN	0.999924	41.208	0.00462303	41.208	0	0		NaN	0	0		NaN	0.999976	46.1784	0.00430399	46.178	0	0		NaN					0.999999	61.7031	4.10534e-05	61.703
P06700	50	P06700	P06700	NAD-dependent histone deacetylase SIR2	SIR2		1	55.4522	0.00171575	91.584	73.144	55.452	1	48.5679	0.0153778	48.568	1	45.257	0.0184442	45.257	1	91.5838	0.00171575	91.584	1	69.7206	0.0031768	69.721	1	72.5312	0.00228902	72.531	1	72.289	0.0023655	72.289	1	50.1492	0.0139133	50.149	1	57.8361	0.00843434	57.836	1	59.5697	0.00726337	59.57	1
P06700	82	P06700	P06700	NAD-dependent histone deacetylase SIR2	SIR2		1	78.0317	2.42258e-07	83.088	72.968	83.088	0	0		NaN					1	78.0317	2.42258e-07	83.088
P06700	17	P06700	P06700	NAD-dependent histone deacetylase SIR2	SIR2		1	113.136	4.63097e-15	124.25	106.18	124.25	0.99997	45.1597	0.00155948	51.888	0.999983	47.6262	0.000875489	58.671	1	113.136	4.63097e-15	124.25					0.999999	58.8792	0.00020098	75.018	0.999998	57.4617	0.000478245	64.52	0.999785	36.6779	0.0059841	42.338	0.999937	42.0163	0.0156812	45.438	0.999896	39.8302	0.00525837	43.798
P06701	461	P06701	P06701	Regulatory protein SIR3	SIR3		1	78.6261	0.000367623	83.53	62.28	83.53
P06701	470	P06701	P06701	Regulatory protein SIR3	SIR3		0.992649	21.3043	0.00165971	72.096	46.05	72.096
P06701	305	P06701	P06701	Regulatory protein SIR3	SIR3		0.995008	22.9956	0.00337177	73.841	15.611	56.258																					0	0		NaN					0	0		NaN
P06701	790	P06701	P06701	Regulatory protein SIR3	SIR3		0.999359	31.9274	4.64603e-05	82.007	75.426	82.007
P06701	111	P06701	P06701	Regulatory protein SIR3	SIR3		1	48.4235	1.18688e-88	190.63	164.9	48.423	0	0		NaN	1	73.2482	0.000708842	85.676	1	99.3048	1.62605e-28	146.64	0.999945	42.6113	3.91112e-05	65.784	1	76.6789	6.88518e-12	114.88	1	114.894	2.79032e-60	173.77	1	76.6789	9.56287e-28	141.97	1	78.3345	0.000173611	78.334	1	75.3782	8.06514e-15	121.44	1
P06738	606	P06738	P06738	Glycogen phosphorylase	GPH1		0.883801	8.8115	0.00368903	67.897	43.808	63.534
P06738	607	P06738	P06738	Glycogen phosphorylase	GPH1		0.926361	10.9967	0.00229051	75.294	48.505	75.294
P06777	32	P06777	P06777	DNA repair protein RAD1	RAD1		0.998297	27.6809	0.00586603	41.136	35.17	41.136									0	0		NaN																					0	0		NaN
P06778	300	P06778	P06778	DNA repair and recombination protein RAD52	RAD52		1	58.6765	6.40586e-17	146.07	128.21	58.676
P06778	251	P06778	P06778	DNA repair and recombination protein RAD52	RAD52		0.999997	55.4273	4.68892e-06	112.36	90.311	104.22																																	0	0		NaN
P06778	10	P06778	P06778	DNA repair and recombination protein RAD52	RAD52		0.903745	10.3628	5.82114e-12	132.44	117.47	46.099																																	0	0		NaN
P06778	11	P06778	P06778	DNA repair and recombination protein RAD52	RAD52		1	188.099	1.32768e-207	276.41	233.67	190.86	0	0		NaN	0.999946	42.6945	0.00694205	43.03	0.999977	46.4282	0.00461131	50.897	0	0		NaN	1	76.1107	9.01496e-05	77.527	1	102.192	2.99549e-07	102.73	1	92.4007	4.88994e-07	96.464	1	96.7337	4.74301e-07	96.734	1	175.545	3.28338e-50	181.26	1
P06778	206	P06778	P06778	DNA repair and recombination protein RAD52	RAD52		0.999956	43.565	0.00119708	59.261	50.319	45.434
P06778	216	P06778	P06778	DNA repair and recombination protein RAD52	RAD52		0.979138	16.715	0.000156926	69.716	63.684	69.716
P06778	461	P06778	P06778	DNA repair and recombination protein RAD52	RAD52		0.999899	39.9545	0.000177713	71.344	57.94	71.344
P06778	161	P06778	P06778	DNA repair and recombination protein RAD52	RAD52		1	105.065	4.52388e-25	141.86	110.55	105.06
P06778	220	P06778	P06778	DNA repair and recombination protein RAD52	RAD52		0.598199	1.72834	0.000222928	85.457	70.771	85.457
P06786	1257	P06786	P06786	DNA topoisomerase 2	TOP2		1	77.3751	3.93494e-24	114.01	92.64	105.79																	0	0		NaN	0	0		NaN	0	0		NaN	0	0		NaN	0	0		NaN	0
P06786	1277	P06786	P06786	DNA topoisomerase 2	TOP2		0.954288	13.6676	9.87713e-210	272.06	260.65	125.59	0.5	0	1.08005e-101	203.77	0.5	0	1.38702e-130	223.23	0.5	0	1.79788e-115	215.98	0.5	0	5.48227e-38	162.33	0.876017	8.49151	1.16305e-148	245.88	0.5	0	4.23484e-148	272.06	0.5	0	7.24079e-148	237.61	0.5	0	1.59739e-75	189.48	0.5	0	1.55517e-166	245.12	0.5
P06786	1278	P06786	P06786	DNA topoisomerase 2	TOP2		0.830967	6.91618	9.87713e-210	272.06	260.65	60.621	0.542143	0.733847	1.08005e-101	203.77	0.542827	0.745803	1.38702e-130	223.23	0.5	0	1.79788e-115	215.98	0.545359	0.790131	5.48227e-38	162.33	0.568193	1.19207	1.16305e-148	245.88	0.580673	1.41379	4.23484e-148	272.06	0.568193	1.19207	7.24079e-148	237.61	0.577014	1.34861	1.59739e-75	189.48	0.573804	1.29155	1.55517e-166	245.12	0.553299
P06786	1220	P06786	P06786	DNA topoisomerase 2	TOP2		1	115.61	2.69691e-20	124.34	19.142	124.34	0	0		NaN					0	0		NaN	0	0		NaN	1	84.7385	0.0030229	94.006	1	99.4738	0.00142908	111.04	0.999998	57.5661	0.00881692	68.485	0	0		NaN	1	115.075	1.39683e-05	124.34	0
P06786	11	P06786	P06786	DNA topoisomerase 2	TOP2		0.878192	8.57912	0.000296825	85.958	52.729	85.958
P06786	14	P06786	P06786	DNA topoisomerase 2	TOP2		0.637634	2.45425	3.55817e-05	86.624	50.665	86.624
P06787	91	P06787	P06787	Calmodulin	CMD1		0.998274	27.6212	0.00318252	58.577	26.957	58.577
P07170	108	P07170	P07170	Adenylate kinase	ADK1		1	53.1664	0.000717607	63.16	51.241	53.166	0	0		NaN	0	0		NaN	0	0		NaN	0	0		NaN													0	0		NaN
P07244	19	P07244	P07244	Bifunctional purine biosynthetic protein ADE5,7;Phosphoribosylamine--glycine ligase;Phosphoribosylformylglycinamidine cyclo-ligase	ADE5,7		1	48.2293	0.00253243	48.229	10.573	48.229																	1	48.2293	0.00253243	48.229	0	0		NaN	0	0		NaN					0	0		NaN	0
P07246	35	P07246	P07246	Alcohol dehydrogenase 3, mitochondrial	ADH3		1	99.8021	0.000693684	99.802	46.636	99.802	1	78.1127	0.00833424	78.113	0	0		NaN	1	66.2702	0.0223028	66.27	1	58.9807	0.0359953	58.981	1	67.8972	0.0178009	67.897	0	0		NaN	0	0		NaN	0	0		NaN	1	65.3052	0.024174	65.305	0
P07260	9	P07260	P07260	Eukaryotic translation initiation factor 4E	CDC33		1	125.471	9.54786e-18	131.13	95.717	131.13	1	125.471	9.54786e-18	131.13	1	70.4353	0.000234158	72.433	0.999997	55.1393	0.00081989	58.98	1	72.9165	0.000198555	74.786	0.621389	2.15171	0.00122335	100.45	0	0		NaN	0	0		NaN	0.625471	2.22722	0.00136277	89.55	0	0		NaN	0
P07260	8	P07260	P07260	Eukaryotic translation initiation factor 4E	CDC33		0.941481	12.0651	1.48598e-05	126.67	76.628	126.67					0.917015	10.4338	0.00136277	89.55													0	0		NaN	0	0		NaN					0.620816	2.14112	0.00309571	68.214	0
P07261	329	P07261	P07261	Glycolytic genes transcriptional activator GCR1	GCR1		1	78.5482	0.00140852	78.548	17.129	78.548
P07261	619	P07261	P07261	Glycolytic genes transcriptional activator GCR1	GCR1		1	91.9373	0.000240642	91.937	64.608	91.937	1	90.6853	0.000296823	90.685	1	67.1532	0.00877027	67.153	1	91.9373	0.000240642	91.937	0	0		NaN	0	0		NaN									0	0		NaN	1	55.4006	0.0530312	55.401
P07271	91	P07271	P07271	ATP-dependent DNA helicase PIF1	PIF1		0.999999	60.4363	0.004619	60.436	32.554	60.436																																	0	0		NaN
P07271	166	P07271	P07271	ATP-dependent DNA helicase PIF1	PIF1		0.997011	25.2324	0.00495425	79.469	51.362	50.127													0	0		NaN	0	0		NaN	0	0		NaN	0	0		NaN	0	0		NaN
P07271	167	P07271	P07271	ATP-dependent DNA helicase PIF1	PIF1		0.989341	19.6761	0.00271838	58.981	42.778	58.981													0	0		NaN	0	0		NaN	0	0		NaN	0	0		NaN	0	0		NaN
P07271	626	P07271	P07271	ATP-dependent DNA helicase PIF1	PIF1		1	64.4386	0.000417243	64.439	41.063	64.439
P07273	4	P07273	P07273	Transcription elongation factor S-II	DST1		1	69.9233	6.94245e-05	78.653	69.698	78.653					0	0		NaN
P07281;P07280	103;103	P07281	P07281	40S ribosomal protein S19-B;40S ribosomal protein S19-A	RPS19B;RPS19A		1	68.9858	1.11783e-08	125.5	100.8	125.5	0	0		NaN					0	0		NaN	0	0		NaN	0	0		NaN													0	0		NaN
P07281;P07280	110;110	P07281	P07281	40S ribosomal protein S19-B;40S ribosomal protein S19-A	RPS19B;RPS19A		0.999999	62.0371	0.000442525	74.816	57.313	74.816	0	0		NaN													0	0		NaN
P07281;P07280	38;38	P07281	P07281	40S ribosomal protein S19-B;40S ribosomal protein S19-A	RPS19B;RPS19A		0.999999	59.0197	2.73639e-06	66.886	58.036	66.886
P07281;P07280	78;78	P07281	P07281	40S ribosomal protein S19-B;40S ribosomal protein S19-A	RPS19B;RPS19A		0.999997	54.6528	0.00266964	87.754	43.033	85.265	0.999938	42.0694	0.0118676	49.715					0.999866	38.7282	0.0120663	49.536	0	0		NaN	0.999846	38.1217	0.0118676	49.715	0.999934	41.7899	0.0118676	49.715	0.999243	31.2059	0.0104978	43.442	0.999898	39.8953	0.0456023	57.281	0.999952	43.1589	0.0106584	50.805	0
P07281;P07280	84;84	P07281	P07281	40S ribosomal protein S19-B;40S ribosomal protein S19-A	RPS19B;RPS19A		0.99139	20.6124	0.001355	51.726	45.831	45.79	0	0		NaN					0.979186	16.7252	0.00204827	49.929	0	0		NaN	0.979108	16.7085	0.0065642	41.644	0.878954	8.61014	0.0059402	42.789									0.878954	8.61014	0.0059402	42.789	0
P07281;P07280	92;92	P07281	P07281	40S ribosomal protein S19-B;40S ribosomal protein S19-A	RPS19B;RPS19A		0.999992	51.0811	0.00081256	54.368	48.826	54.368	0	0		NaN					0	0		NaN	0	0		NaN																	0	0		NaN
P07991	44	P07991	P07991	Ornithine aminotransferase	CAR2		0.999996	53.954	0.000346345	56.298	40.599	56.298													0.999996	53.954	0.000346345	56.298																	0	0		NaN
P08566	256	P08566	P08566	Pentafunctional AROM polypeptide;3-dehydroquinate synthase;3-phosphoshikimate 1-carboxyvinyltransferase;Shikimate kinase;3-dehydroquinate dehydratase;Shikimate dehydrogenase	ARO1		1	67.0348	0.00347862	97.071	33.506	67.035	1	72.2335	0.00418079	72.234	1	75.3106	0.00347862	75.311	1	52.7161	0.0105081	73.039	1	44.1352	0.0313604	44.135	1	70.9125	0.0051243	78.616	1	40.0015	0.00418079	72.234	1	75.3106	0.00347862	75.311	1	71.7148	0.0377089	71.715	1	75.3106	0.00347862	75.311	1
P08566	258	P08566	P08566	Pentafunctional AROM polypeptide;3-dehydroquinate synthase;3-phosphoshikimate 1-carboxyvinyltransferase;Shikimate kinase;3-dehydroquinate dehydratase;Shikimate dehydrogenase	ARO1		1	67.0348	0.00347862	97.071	33.506	67.035	1	72.2335	0.00418079	72.234	1	75.3106	0.00347862	75.311	1	52.7161	0.0105081	73.039	1	44.1352	0.0313604	44.135	1	70.9125	0.0051243	78.616	1	40.0015	0.00418079	72.234	1	75.3106	0.00347862	75.311	1	71.7148	0.0377089	71.715	1	75.3106	0.00347862	75.311	1
P09232	605	P09232	P09232	Cerevisin	PRB1		1	47.8688	1.8706e-05	76.539	67.375	47.869									1	54.4363	0.008365	54.436
P09733	42	P09733	P09733	Tubulin alpha-1 chain	TUB1		0.978621	16.6066	0.000375488	62.765	44.353	62.765
P09733	340	P09733	P09733	Tubulin alpha-1 chain	TUB1		1	109.835	1.44915e-08	109.83	98.576	109.83
P09938	20	P09938	P09938	Ribonucleoside-diphosphate reductase small chain 1	RNR2		0.975331	15.97	0.000340318	99.481	79.251	62.378
P09938	378	P09938	P09938	Ribonucleoside-diphosphate reductase small chain 1	RNR2		0.999871	38.9088	0.00065047	64.224	38.113	58.487									0	0		NaN																	0	0		NaN
P0C0T4;Q3E792	21;21	P0C0T4;Q3E792	Q3E792	40S ribosomal protein S25-B;40S ribosomal protein S25-A	RPS25B;RPS25A		0.884139	8.82582	0.00062197	82.671	43.129	77.741	0.884139	8.82582	0.0022778	77.741	0	0		NaN	0.746973	4.70139	0.00339257	73.616	0	0		NaN	0	0		NaN	0.730251	4.32513	0.0120912	63.306	0.667183	3.0204	0.030411	43.124	0	0		NaN	0.5	0	0.000905924	79.597	0
P0C0T4;Q3E792	22;22	P0C0T4;Q3E792	Q3E792	40S ribosomal protein S25-B;40S ribosomal protein S25-A	RPS25B;RPS25A		0.656054	2.80449	0.000410193	117.17	65.481	104.45	0.60672	1.88286	0.00589321	68.915	0	0		NaN					0.622956	2.18066	0.00062197	94.407	0.583336	1.46133	0.0297655	56.011	0	0		NaN					0.656054	2.80449	0.000905924	104.45	0.5	0	0.000905924	79.597	0
P0C0T4;Q3E792	12;12	P0C0T4;Q3E792	Q3E792	40S ribosomal protein S25-B;40S ribosomal protein S25-A	RPS25B;RPS25A		1	91.7668	2.88377e-07	101.89	79.549	101.89	0	0		NaN	0	0		NaN					0	0		NaN	0	0		NaN	0	0		NaN					0	0		NaN	0	0		NaN	0
P0C0T4;Q3E792	46;46	P0C0T4;Q3E792	Q3E792	40S ribosomal protein S25-B;40S ribosomal protein S25-A	RPS25B;RPS25A		0.965485	14.4674	0.00130167	64.52	39.314	64.52	0	0		NaN	0	0		NaN	0	0		NaN	0	0		NaN	0	0		NaN	0	0		NaN	0	0		NaN	0	0		NaN	0	0		NaN	0
P0C0T4;Q3E792	90;90	P0C0T4;Q3E792	Q3E792	40S ribosomal protein S25-B;40S ribosomal protein S25-A	RPS25B;RPS25A		0.999964	44.4094	0.00395959	76.17	36.102	76.17	0	0		NaN	0.999681	34.9618	0.0160223	44.882	0	0		NaN	0	0		NaN	0.999681	34.9618	0.0119539	68.625	0.999579	33.7578	0.017684	43.272	0	0		NaN	0.976382	16.1638	0.0270459	49.96	0.999589	33.8644	0.0164934	42.338	0.999383
P0C0T4;Q3E792	94;94	P0C0T4;Q3E792	Q3E792	40S ribosomal protein S25-B;40S ribosomal protein S25-A	RPS25B;RPS25A		0.997273	26.6613	0.000375513	65.563	42.645	65.241	0	0		NaN	0.949375	15.5207	0.0393204	43.382	0	0		NaN	0	0		NaN	0.9797	17.0084	0.000492057	62.924	0.982829	20.5454	0.00304528	55.314	0.847349	8.17864	0.0070606	43.382					0	0		NaN	0.91282
P0C0T4	97	P0C0T4	P0C0T4	40S ribosomal protein S25-B	RPS25B		1	45.7899	2.42781e-05	82.908	56.367	45.79	0	0		NaN					0	0		NaN	0	0		NaN	0	0		NaN	0	0		NaN	0	0		NaN	0	0		NaN	0	0		NaN	0
P0C0T4;Q3E792	33;33	P0C0T4;Q3E792	Q3E792	40S ribosomal protein S25-B;40S ribosomal protein S25-A	RPS25B;RPS25A		1	124.927	1.00796e-16	128.9	99.181	128.9	1	113.115	1.24243e-12	116.96	1	80.1029	7.09804e-05	81.526	1	103.435	6.23363e-12	107.34	1	72.5265	4.17432e-05	78.069	1	81.6286	1.39048e-05	83.966	1	73.0738	0.000199099	75.143	1	77.0209	5.0659e-05	78.326	1	105.162	6.843e-12	106.52	1	111.408	2.65979e-13	115.31	1
Q3E754;P0C0V8	38;38	Q3E754	Q3E754	40S ribosomal protein S21-B;40S ribosomal protein S21-A	RPS21B;RPS21A		1	46.8917	0.00012094	71.601	58.482	46.892					1	50.6533	0.00637171	50.653	1	71.6009	0.00012094	71.601	0	0		NaN	0	0		NaN									0	0		NaN	1	52.1723	0.00489135	52.172	0
Q3E754;P0C0V8	16;16	Q3E754	Q3E754	40S ribosomal protein S21-B;40S ribosomal protein S21-A	RPS21B;RPS21A		0.999912	40.565	4.14798e-06	79.545	61.007	69.92									0	0		NaN	0	0		NaN	0	0		NaN	0	0		NaN					0	0		NaN					0
Q3E754;P0C0V8	25;25	Q3E754	Q3E754	40S ribosomal protein S21-B;40S ribosomal protein S21-A	RPS21B;RPS21A		0.582728	1.45046	4.14798e-06	79.545	61.007	48.848									0	0		NaN	0	0		NaN	0	0		NaN																	0
Q3E754;P0C0V8	5;5	Q3E754	Q3E754	40S ribosomal protein S21-B;40S ribosomal protein S21-A	RPS21B;RPS21A		1	128.482	6.46847e-19	132.81	123.88	132.81	1	82.0186	4.51948e-05	87.447					1	94.185	2.88368e-06	98.943	0.999958	43.7983	0.00479891	43.798	1	64.5578	0.000470739	64.675	1	63.1281	0.000474522	63.128					0.999994	51.9113	0.00124462	53.828	1	75.0462	0.000105613	80.706	0.99996
P0C0X0	4	P0C0X0	P0C0X0	40S ribosomal protein S28-B	RPS28B		1	108.962	6.5076e-31	169.93	148.49	169.93	1	81.1582	4.54351e-06	109.42	1	63.9139	1.05377e-05	101.11	1	108.962	6.5076e-31	169.93	0.999998	57.1423	0.000148491	79.148	0.999991	50.4377	3.24318e-05	87.913	0.999999	62.9595	8.39349e-06	99.653	0.999999	60.1101	1.03903e-05	94.692	1	64.4691	9.7843e-06	91.584	1	71.134	6.87723e-06	101.11	0.999999
P0C0X0	11	P0C0X0	P0C0X0	40S ribosomal protein S28-B	RPS28B		0.912428	10.1784	0.00114634	69.423	59.512	69.423																					0	0		NaN					0	0		NaN
P0C0X0;Q3E7X9	14;14	P0C0X0;Q3E7X9	P0C0X0	40S ribosomal protein S28-B;40S ribosomal protein S28-A	RPS28B;RPS28A		0.562662	1.0943	0.00359049	70.919	63.351	70.919
P0C2H6;P0C2H7	133;133	P0C2H6	P0C2H6	60S ribosomal protein L27-A;60S ribosomal protein L27-B	RPL27A;RPL27B		1	103.7	1.97266e-05	111.61	106.18	103.7	1	46.6059	0.00037179	86.624	1	71.0162	0.000391046	71.016	0	0		NaN	1	68.8931	1.97266e-05	111.61	1	74.162	0.000190396	85.377	1	73.0666	0.000209605	73.067	1	73.0666	0.000209605	73.067	1	85.8073	0.000380875	85.807	1	62.3026	0.0013835	62.303	1
P0C2H6;P0C2H7	27;27	P0C2H6	P0C2H6	60S ribosomal protein L27-A;60S ribosomal protein L27-B	RPL27A;RPL27B		1	68.2234	1.13991e-06	105.65	95.126	105.65	0.999996	53.5101	2.01478e-06	94.402	0.999954	43.3839	2.38606e-06	94.191	0.999972	45.5041	2.73157e-06	92.792	0.999995	52.7289	5.49698e-06	90.697	0.999987	49.3471	3.03321e-06	102.66	0.999999	61.6829	4.07106e-06	93.623	0.999971	45.3244	1.3959e-05	104.87	0.999975	45.9365	0.00024808	83.617	0.999997	55.2061	4.77193e-06	92.925	0.999977
P0C2H6	52	P0C2H6	P0C2H6	60S ribosomal protein L27-A	RPL27A		0.999956	43.5831	3.97482e-11	113.86	98.602	59.245	0	0		NaN	0	0		NaN	0	0		NaN					0	0		NaN	0	0		NaN	0	0		NaN					0	0		NaN	0
P0C2H6;P0C2H7	111;111	P0C2H6	P0C2H6	60S ribosomal protein L27-A;60S ribosomal protein L27-B	RPL27A;RPL27B		0.90621	9.85073	4.70431e-06	84.874	67.935	64.55	0.5	0	4.70431e-06	84.874	0.5	0	3.52524e-05	71.085	0.90621	9.85073	7.34953e-06	82.248	0.887558	8.9727	0.0181318	45.257	0.5	0	0.000100932	61.692	0.5	0	0.000490597	52.453	0.5	0	6.23768e-05	66.965	0	0		NaN	0.5	0	5.37519e-06	83.418	0
P0C2H6;P0C2H7	112;112	P0C2H6	P0C2H6	60S ribosomal protein L27-A;60S ribosomal protein L27-B	RPL27A;RPL27B		0.535894	0.624608	4.70431e-06	84.874	67.935	44.616	0.5	0	4.70431e-06	84.874	0.5	0	3.52524e-05	71.085	0.5	0	7.34953e-06	82.248	0	0		NaN	0.5	0	0.000100932	61.692	0.5	0	0.000490597	52.453	0.5	0	6.23768e-05	66.965	0	0		NaN	0.5	0	5.37519e-06	83.418	0
P0C2H8;P0C2H9	5;5	P0C2H8	P0C2H8	60S ribosomal protein L31-A;60S ribosomal protein L31-B	RPL31A;RPL31B		1	46.7296	1.82877e-08	108.34	97.55	46.73	0	0		NaN	0	0		NaN	0	0		NaN	0.999985	48.1681	0.00136394	51.888	0	0		NaN	0.999989	49.7158	0.00133174	52.254					1	60.5976	0.00511727	60.598	0.999986	48.3877	0.0186975	50.079	0
P0C2H8;P0C2H9	18;18	P0C2H8	P0C2H8	60S ribosomal protein L31-A;60S ribosomal protein L31-B	RPL31A;RPL31B		0.99993	41.5239	2.53823e-06	87.932	80.614	87.932	0	0		NaN					0	0		NaN	0	0		NaN	0	0		NaN	0	0		NaN					0.700314	3.68626	0.00809019	45.33	0	0		NaN	0
P0C2H8;P0C2H9	61;61	P0C2H8	P0C2H8	60S ribosomal protein L31-A;60S ribosomal protein L31-B	RPL31A;RPL31B		0.991999	20.9335	2.64935e-06	89.827	57.984	89.827	0.987318	18.9126	0.00846883	57.785					0	0		NaN	0	0		NaN	0	0		NaN									0	0		NaN	0.900809	9.5816	0.00305695	70.1
P0C2H8;P0C2H9	65;65	P0C2H8	P0C2H8	60S ribosomal protein L31-A;60S ribosomal protein L31-B	RPL31A;RPL31B		0.575601	1.32347	0.00736045	59.426	19.424	40.589	0	0		NaN					0	0		NaN	0	0		NaN	0.56049	1.05598	0.00736045	59.426					0.538614	0.672136	0.0271929	40.589	0	0		NaN
P0C2H8;P0C2H9	26;26	P0C2H8	P0C2H8	60S ribosomal protein L31-A;60S ribosomal protein L31-B	RPL31A;RPL31B		0.980262	16.9604	0.000409241	86.882	65.91	85.807	0	0		NaN	0	0		NaN					0.911354	10.1203	0.00637049	48.423	0	0		NaN					0.69305	3.53697	0.0140238	46.819	0.97004	15.1025	0.0203136	40.724	0.875285	8.4623	0.00494403	59.908	0
Q12501;Q12113;Q07791;Q03494;P25384;P0C2J3;Q12491;Q12472;P0CX64;P0CX63;Q99303;Q12439;Q12392;Q12293;Q12260;Q03483;P25383;P0C2J4;P0CX62;P0CX61	347;347;347;347;347;347;347;347;347;347;347;347;347;347;347;347;347;347;347;347	Q12501	Q12501	Transposon Ty2-OR2 Gag-Pol polyprotein;Capsid protein;Ty2 protease;Integrase;Reverse transcriptase/ribonuclease H;Transposon Ty2-OR1 Gag-Pol polyprotein;Capsid protein;Ty2 protease;Integrase;Reverse transcriptase/ribonuclease H;Transposon Ty2-DR3 Gag-Pol polyprotein;Capsid protein;Ty2 protease;Integrase;Reverse transcriptase/ribonuclease H;Transposon Ty2-DR2 Gag-Pol polyprotein;Capsid protein;Ty2…	TY2B-OR2;TY2B-OR1;TY2B-DR3;TY2B-DR2;TY2B-C;TY2B-LR1;TY2B-B;TY2B-DR1;TY2B-GR2;TY2B-F;TY2A-DR3;TY2A-OR1;TY2A-DR1;TY2A-OR2;TY2A-B;TY2A-DR2;TY2A-C;TY2A-LR1;TY2A-GR2;TY2A-F		0.999901	39.8918	0.00728815	51.528	12.653	51.528																																	0.999737	34.8713	0.017389	43.77
Q12501;Q12113;Q07791;Q03494;P25384;P0C2J3;Q12491;Q12472;P0CX64;P0CX63;Q99303;Q12439;Q12392;Q12293;Q12260;Q03483;P25383;P0C2J4;P0CX62;P0CX61	353;353;353;353;353;353;353;353;353;353;353;353;353;353;353;353;353;353;353;353	Q12501	Q12501	Transposon Ty2-OR2 Gag-Pol polyprotein;Capsid protein;Ty2 protease;Integrase;Reverse transcriptase/ribonuclease H;Transposon Ty2-OR1 Gag-Pol polyprotein;Capsid protein;Ty2 protease;Integrase;Reverse transcriptase/ribonuclease H;Transposon Ty2-DR3 Gag-Pol polyprotein;Capsid protein;Ty2 protease;Integrase;Reverse transcriptase/ribonuclease H;Transposon Ty2-DR2 Gag-Pol polyprotein;Capsid protein;Ty2…	TY2B-OR2;TY2B-OR1;TY2B-DR3;TY2B-DR2;TY2B-C;TY2B-LR1;TY2B-B;TY2B-DR1;TY2B-GR2;TY2B-F;TY2A-DR3;TY2A-OR1;TY2A-DR1;TY2A-OR2;TY2A-B;TY2A-DR2;TY2A-C;TY2A-LR1;TY2A-GR2;TY2A-F		0.961883	14.0196	0.00728815	51.528	12.653	51.528																																	0.807077	6.21391	0.017389	43.77
P0CE41	275	P0CE41	P0CE41	Heme-responsive zinc finger transcription factor HAP1	HAP1		0.922484	10.9903	0.00410427	64.394	15.345	64.394																																	0	0		NaN
P0CE41	277	P0CE41	P0CE41	Heme-responsive zinc finger transcription factor HAP1	HAP1		0.999995	54.8135	0.00410427	64.394	15.345	64.394																																	0	0		NaN
P0CE41	1087	P0CE41	P0CE41	Heme-responsive zinc finger transcription factor HAP1	HAP1		1	144.55	3.02666e-17	153.34	144.29	152.85	1	123.045	5.30738e-10	134.98	1	144.468	5.53035e-17	149.23	1	135.038	3.2718e-13	144.28	1	144.55	3.32265e-17	152.85	1	97.3304	4.20395e-05	101.39	1	97.6905	4.30564e-05	100.93	0.999999	63.1554	0.000957848	71.555	0	0		NaN	1	126.609	1.03104e-12	137.16	1
P0CH09;P0CH08	88;88	P0CH09	P0CH09	Ubiquitin-60S ribosomal protein L40;Ubiquitin;60S ribosomal protein L40	RPL40B;RPL40A		0.999987	48.9402	3.3033e-05	92.062	69.233	82.029	0.999704	35.2868	0.00212135	69.979	0	0		NaN	0.999878	39.1217	0.000155664	81.865	0.997015	25.2379	0.00854958	48.796	0.908835	9.98655	0.0109735	59.8	0	0		NaN	0	0		NaN	0.998303	27.6963	0.00158682	72.006	0.999847	38.1553	7.07412e-05	83.005	0
P0CH09;P0CH08	93;93	P0CH09	P0CH09	Ubiquitin-60S ribosomal protein L40;Ubiquitin;60S ribosomal protein L40	RPL40B;RPL40A		0.999068	30.3037	0.000111606	78.655	75.432	57.785	0.980303	16.9697	0.00520224	50.194	0	0		NaN	0	0		NaN	0	0		NaN	0	0		NaN	0	0		NaN	0	0		NaN	0	0		NaN					0
P0CH09;P0CH08	114;114	P0CH09	P0CH09	Ubiquitin-60S ribosomal protein L40;Ubiquitin;60S ribosomal protein L40	RPL40B;RPL40A		1	74.38	0.000547455	79.659	73.182	79.659													0.999998	57.1872	0.000547455	62.466													0.999996	54.1388	0.00545462	59.418
P0CT04	58	P0CT04	P0CT04	Protease B inhibitor 2	PBI2		1	94.1238	4.02774e-07	98.592	72.615	98.592	1	74.0369	6.33844e-05	78.505					1	94.1238	4.02774e-07	98.592					0	0		NaN	0.999984	48.0316	0.00119326	52.5	0.999986	48.5324	0.00114498	53.001									0.99999
P0CT04	40	P0CT04	P0CT04	Protease B inhibitor 2	PBI2		0.999951	43.1184	1.59126e-10	92.792	68.385	84.658	0.99638	24.3976	0.0130697	48.741	0	0		NaN	0.999671	34.8256	0.00632952	58.676	0	0		NaN	0	0		NaN	0	0		NaN	0	0		NaN	0	0		NaN
P0CT04	45	P0CT04	P0CT04	Protease B inhibitor 2	PBI2		1	74.7884	2.24411e-07	101.32	77.249	101.32	0	0		NaN	0	0		NaN	0.999939	42.151	0.000202797	67.115	0	0		NaN	0	0		NaN	0	0		NaN	0	0		NaN	0	0		NaN	0	0		NaN	0
P0CT04	54	P0CT04	P0CT04	Protease B inhibitor 2	PBI2		0.995806	23.7556	5.55449e-06	107.83	86.459	97.597	0.995806	23.7556	1.12729e-05	97.597					0.976443	16.1752	1.10547e-05	98.04	0.903497	9.71387	4.18214e-05	79.693	0.911472	10.1266	2.929e-05	94.297	0.982097	17.3923	2.929e-05	81.017	0.908893	9.98962	1.20854e-05	91.855	0.843408	7.31269	0.00191447	60.102	0.962965	14.1499	1.20512e-05	96.015	0.962965
P0CT04	20	P0CT04	P0CT04	Protease B inhibitor 2	PBI2		1	106.424	1.58616e-12	110.98	85.511	106.42	1	59.6073	0.000530475	88.596	0	0		NaN	1	94.4606	1.58616e-12	110.98	0.583019	1.45567	0.00731978	60.436	1	88.9738	5.8297e-07	88.974	1	52.8915	4.53553e-05	73.022	1	41.3778	0.00200617	73.499	0.570069	1.22529	0.0035351	54.982	1	53.3774	0.000451877	93.258	1
P0CT04	11	P0CT04	P0CT04	Protease B inhibitor 2	PBI2		1	149.615	9.86096e-19	166.09	144.56	166.09	0.999971	45.3112	0.0290385	65.038	0	0		NaN	1	74.4731	0.00231369	78.939	1	92.2345	0.00467321	99.802	0.588747	1.5582	0.0359723	65.038	0.603253	1.81985	0.0182378	77.674	0	0		NaN	0	0		NaN	0.60105	1.77992	0.0323289	67.032	0
P0CT04	19	P0CT04	P0CT04	Protease B inhibitor 2	PBI2		0.992288	21.095	2.98594e-05	115.91	87.833	115.91	0.907801	9.93277	0.000734273	75.652	0	0		NaN	0.969387	15.0065	0.000209851	100.82	0.864704	8.05585	0.000180583	89.827	0.921236	10.6813	0.00229836	72.275	0.865255	8.09598	0.00304874	70.399	0.97493	15.9413	0.000821979	74.533	0.978955	16.6763	0.000144878	83.883	0.92562	10.9499	0.000617666	77.14	0.91446
P0CT04	3	P0CT04	P0CT04	Protease B inhibitor 2	PBI2		1	82.9384	0.000590634	89.827	58.405	89.827													0.999999	58.8982	0.00504392	60.398
P0CT04	56	P0CT04	P0CT04	Protease B inhibitor 2	PBI2		0.961626	13.9897	1.28967e-05	94.297	81.718	83					0.961626	13.9897	0.000165741	83	0.608236	1.91048	0.00309513	69.979	0.622486	2.17197	0.00072009	81.865					0.548687	0.848465	0.00072009	81.865	0	0		NaN	0.548687	0.848465	0.00072009	81.865	0.622486	2.17197	0.00072009	81.865	0.722544
P0CX24;P0CX23	71;71	P0CX24	P0CX24	60S ribosomal protein L20-B;60S ribosomal protein L20-A	RPL20B;RPL20A		0.982182	17.4133	2.20784e-06	99.021	64.928	65.924
P0CX24;P0CX23	73;73	P0CX24	P0CX24	60S ribosomal protein L20-B;60S ribosomal protein L20-A	RPL20B;RPL20A		0.787669	5.6933	0.00019329	73.688	48.53	48.372
P0CX24;P0CX23	149;149	P0CX24	P0CX24	60S ribosomal protein L20-B;60S ribosomal protein L20-A	RPL20B;RPL20A		1	130.185	3.5186e-10	158.05	122.4	158.05	1	92.9976	1.29217e-06	100.72	1	106.051	3.1456e-07	128.28	1	98.7437	5.77103e-07	112.15	1	100.863	1.5609e-08	120.96	1	130.185	3.5186e-10	158.05	1	90.237	1.38602e-06	111.63	1	92.6177	1.4397e-06	100.72	1	101.439	1.11708e-06	116.54	1	93.3518	1.1113e-06	102.4	1
P0CX24;P0CX23	161;161	P0CX24	P0CX24	60S ribosomal protein L20-B;60S ribosomal protein L20-A	RPL20B;RPL20A		1	63.9815	0.00339953	80.455	62.646	80.455	0	0		NaN									0	0		NaN																	0	0		NaN	0
P0CX24;P0CX23	131;131	P0CX24	P0CX24	60S ribosomal protein L20-B;60S ribosomal protein L20-A	RPL20B;RPL20A		0.999996	54.5431	3.46367e-06	113.22	92.89	113.22	0.999801	37.0148	1.71933e-05	84.213	0.999996	54.5431	3.46367e-06	113.22	0.990665	20.2581	9.81341e-05	78.934	0.999977	46.455	6.12568e-05	78.934	0.999974	45.9128	2.53525e-05	93.111	0.990665	20.2581	9.81341e-05	78.934	0.999252	31.2591	0.00103756	68.735	0	0		NaN	0.99933	31.7365	9.81341e-05	78.934	0.990665
P0CX24;P0CX23	136;136	P0CX24	P0CX24	60S ribosomal protein L20-B;60S ribosomal protein L20-A	RPL20B;RPL20A		1	94.8453	1.75202e-14	154.01	124.92	145.72	1	72.2327	8.68232e-05	135.71	1	86.8418	1.75202e-14	154.01	1	83.2687	1.25996e-05	140.45	0.999999	61.6164	1.03174e-07	128.86	1	94.8453	1.0368e-05	145.72	1	78.2209	2.00397e-07	129.1	0.999999	62.2762	2.60331e-05	123.86	0.999998	56.2485	4.99205e-05	118.71	1	74.3624	9.79488e-06	118.71	1
P0CX24;P0CX23	141;141	P0CX24	P0CX24	60S ribosomal protein L20-B;60S ribosomal protein L20-A	RPL20B;RPL20A		1	94.1183	1.03774e-07	128.81	99.267	128.81	1	90.4678	2.85334e-06	121.9	1	78.9507	2.38164e-05	110.39	1	94.1183	1.03774e-07	128.81	1	77.6884	5.08853e-06	118.4	1	89.3428	1.19847e-05	117.52	1	81.3284	1.19847e-05	113.93	1	78.2097	2.38164e-05	114.89	0.999999	61.4782	4.32994e-05	104.22	1	93.1363	6.76518e-06	123.75	1
P0CX24;P0CX23	166;166	P0CX24	P0CX24	60S ribosomal protein L20-B;60S ribosomal protein L20-A	RPL20B;RPL20A		1	73.8853	1.19456e-05	103.87	86.437	73.885	1	50.3534	0.00587486	50.353	0	0		NaN	1	47.8938	0.00761405	56.359	1	42.3359	0.00807373	58.37	0	0		NaN					0	0		NaN	1	40.7149	0.0126901	48.284	0	0		NaN	0
P0CX28;P0CX27	78;78	P0CX28	P0CX28	60S ribosomal protein L42-B;60S ribosomal protein L42-A	RPL42B;RPL42A		0.999999	62.6304	0.000694094	68.355	18.64	68.355	0	0		NaN	0	0		NaN	0	0		NaN	0	0		NaN	0	0		NaN	0	0		NaN					0	0		NaN	0	0		NaN	0
P0CX28;P0CX27	86;86	P0CX28	P0CX28	60S ribosomal protein L42-B;60S ribosomal protein L42-A	RPL42B;RPL42A		0.99275	21.3648	0.000115938	72.652	66.621	40.496	0	0		NaN	0	0		NaN	0	0		NaN	0.99275	21.3648	0.0137268	40.496	0	0		NaN	0	0		NaN					0	0		NaN	0	0		NaN	0
P0CX28;P0CX27	97;97	P0CX28	P0CX28	60S ribosomal protein L42-B;60S ribosomal protein L42-A	RPL42B;RPL42A		0.939748	11.9304	0.000423361	81.972	66.342	68.846	0.882062	8.73846	0.000423361	81.972					0.605252	1.85617	0.00151528	66.568	0	0		NaN	0.705459	3.79326	0.00301064	57.55	0.805607	6.17442	0.00252433	59.931	0.840806	7.22768	0.00560687	49.418									0.639315
P0CX28;P0CX27	98;98	P0CX28	P0CX28	60S ribosomal protein L42-B;60S ribosomal protein L42-A	RPL42B;RPL42A		0.616168	2.05558	0.000386965	86.67	72.579	86.67					0.562383	1.08938	0.00365053	54.416					0	0		NaN																	0.567821	1.18548	0.00731978	47.187
P0CX30;P0CX29	56;56	P0CX30	P0CX30	40S ribosomal protein S23-B;40S ribosomal protein S23-A	RPS23B;RPS23A		0.999999	59.6226	0.000670877	73.632	53.169	73.632
P0CX30;P0CX29	39;39	P0CX30	P0CX30	40S ribosomal protein S23-B;40S ribosomal protein S23-A	RPS23B;RPS23A		0.998989	29.9493	0.000107633	66.606	43.079	61.767													0	0		NaN													0	0		NaN
P0CX30;P0CX29	50;50	P0CX30	P0CX30	40S ribosomal protein S23-B;40S ribosomal protein S23-A	RPS23B;RPS23A		0.99791	26.7898	0.0010345	66.059	32.867	42.382													0	0		NaN													0	0		NaN
P0CX30;P0CX29	110;110	P0CX30	P0CX30	40S ribosomal protein S23-B;40S ribosomal protein S23-A	RPS23B;RPS23A		0.806455	6.19798	0.00268487	53.705	27.29	53.705													0	0		NaN													0	0		NaN
P0CX30;P0CX29	137;137	P0CX30	P0CX30	40S ribosomal protein S23-B;40S ribosomal protein S23-A	RPS23B;RPS23A		0.954698	13.2375	0.000786837	71.558	49.926	71.558													0	0		NaN													0	0		NaN					0
P0CX30;P0CX29	139;139	P0CX30	P0CX30	40S ribosomal protein S23-B;40S ribosomal protein S23-A	RPS23B;RPS23A		0.658263	2.84708	0.000351265	61.375	46.558	61.167													0	0		NaN													0	0		NaN					0
P0CX32;P0CX31	52;52	P0CX32	P0CX32	40S ribosomal protein S24-B;40S ribosomal protein S24-A	RPS24B;RPS24A		1	91.3962	9.68741e-08	99.813	58.193	99.813	1	69.2653	2.81409e-06	73.138	0.999995	52.9328	5.59475e-05	68.187	0.999989	49.6797	0.000806418	50.938	0	0		NaN	1	74.9581	1.14883e-06	79.311	0.999995	52.8291	0.000539618	61.648					0.999998	56.8437	0.000462489	60.034	0.99997	45.2531	0.00514921	49.606	0.999913
P0CX32;P0CX31	123;123	P0CX32	P0CX32	40S ribosomal protein S24-B;40S ribosomal protein S24-A	RPS24B;RPS24A		0.999285	31.455	0.000113339	78.556	55.128	74.173	0.999285	31.455	0.000113339	78.556	0.564765	1.13144	0.00445328	61.65	0.952183	12.9914	0.000170547	75.294	0	0		NaN	0.541212	0.717552	0.0111692	42.001	0.549516	0.863009	0.00406092	52.79	0	0		NaN					0.624496	2.20915	0.010083	51.445	0
P0CX32;P0CX31	49;49	P0CX32	P0CX32	40S ribosomal protein S24-B;40S ribosomal protein S24-A	RPS24B;RPS24A		0.988233	19.2421	0.00101191	79.906	73.011	44.863	0.988233	19.2421	0.00937413	44.863	0	0		NaN	0	0		NaN
P0CX32;P0CX31	11;11	P0CX32	P0CX32	40S ribosomal protein S24-B;40S ribosomal protein S24-A	RPS24B;RPS24A		0.999991	50.5988	5.14607e-05	66.827	62.965	66.827	0	0		NaN									0	0		NaN					0	0		NaN					0	0		NaN
P0CX32;P0CX31	83;83	P0CX32	P0CX32	40S ribosomal protein S24-B;40S ribosomal protein S24-A	RPS24B;RPS24A		0.940498	11.9882	0.000141794	100.23	78.77	44.734																	0.940498	11.9882	0.00465493	44.734									0	0		NaN
P0CX32;P0CX31	84;84	P0CX32	P0CX32	40S ribosomal protein S24-B;40S ribosomal protein S24-A	RPS24B;RPS24A		0.565885	1.15123	0.000141794	100.23	78.77	99.055																													0	0		NaN
P0CX34;P0CX33	3;3	P0CX34	P0CX34	40S ribosomal protein S30-B;40S ribosomal protein S30-A	RPS30B;RPS30A		1	66.7882	0.00158708	72.29	34.782	72.29									0.999979	46.798	0.0127042	48.513	0	0		NaN	0	0		NaN	0	0		NaN	0	0		NaN	0.999999	62.4447	0.00327407	65.395	0	0		NaN
P0CX34;P0CX33	13;13	P0CX34	P0CX34	40S ribosomal protein S30-B;40S ribosomal protein S30-A	RPS30B;RPS30A		0.992852	21.4269	0.00422605	58.274	44.279	58.274									0	0		NaN	0.977062	16.2937	0.00493755	46.844	0	0		NaN	0	0		NaN	0	0		NaN	0.957305	13.5068	0.0107066	50.354	0	0		NaN
P0CX34;P0CX33	20;20	P0CX34	P0CX34	40S ribosomal protein S30-B;40S ribosomal protein S30-A	RPS30B;RPS30A		0.99981	37.2034	0.00379241	90.37	62.845	90.37													0	0		NaN	0	0		NaN									0	0		NaN
P0CX36;P0CX35	71;71	P0CX36	P0CX36	40S ribosomal protein S4-B;40S ribosomal protein S4-A	RPS4B;RPS4A		0.997837	26.6396	0.000262363	62.924	43.346	62.924	0	0		NaN	0	0		NaN	0.947119	12.531	0.00167051	50.897	0	0		NaN	0	0		NaN	0	0		NaN	0	0		NaN	0	0		NaN	0.83384	7.00558	0.00674562	42.209	0
P0CX36;P0CX35	233;233	P0CX36	P0CX36	40S ribosomal protein S4-B;40S ribosomal protein S4-A	RPS4B;RPS4A		0.999998	56.043	1.69265e-13	91.819	74.863	56.043	0.996277	24.2747	3.74228e-09	76.237	0.965287	14.4416	0.000196375	52.249	0.996707	24.8092	0.000146429	54.744	0.996545	24.601	5.2771e-09	73.361	0.999998	56.043	0.00152167	56.043	0	0		NaN	0.974643	15.8475	0.00161298	44.811					0.998744	29.005	4.38644e-10	82.62	0
P0CX36;P0CX35	10;10	P0CX36	P0CX36	40S ribosomal protein S4-B;40S ribosomal protein S4-A	RPS4B;RPS4A		1	68.6125	5.74726e-05	76.588	59.903	76.588																													0.99987	38.8677	0.00981062	43.184
P0CX36;P0CX35	168;168	P0CX36	P0CX36	40S ribosomal protein S4-B;40S ribosomal protein S4-A	RPS4B;RPS4A		0.999994	52.4783	2.89888e-05	94.688	71.596	94.688													0	0		NaN													0	0		NaN
P0CX36;P0CX35	174;174	P0CX36	P0CX36	40S ribosomal protein S4-B;40S ribosomal protein S4-A	RPS4B;RPS4A		0.999883	39.3142	1.94047e-05	96.229	66.486	81.525	0.998402	27.956	2.44783e-05	96.229	0.998403	27.9598	2.96427e-05	84.507	0.995513	23.461	4.06174e-05	91.313	0	0		NaN	0.996105	24.0776	0.000894504	65.241	0.993068	21.5609	0.000829812	65.842	0.997135	25.4157	0.00578286	56.936	0	0		NaN	0.996782	24.9101	0.00303708	57.175	0.987816
P0CX36;P0CX35	134;134	P0CX36	P0CX36	40S ribosomal protein S4-B;40S ribosomal protein S4-A	RPS4B;RPS4A		0.999989	49.5276	0.00199073	49.528	31.584	49.528	0	0		NaN					0.999989	49.5276	0.00199073	49.528
P0CX36;P0CX35	37;37	P0CX36	P0CX36	40S ribosomal protein S4-B;40S ribosomal protein S4-A	RPS4B;RPS4A		1	40.0847	0.00122999	55.33	30.792	40.085	1	49.5369	0.00300356	49.537	0	0		NaN	1	55.3305	0.00122999	55.33									0	0		NaN					0	0		NaN
P0CX36;P0CX35	62;62	P0CX36	P0CX36	40S ribosomal protein S4-B;40S ribosomal protein S4-A	RPS4B;RPS4A		1	90.8388	0.000164587	99.568	80.823	99.568									0	0		NaN	0	0		NaN													0	0		NaN
P0CX36;P0CX35	161;161	P0CX36	P0CX36	40S ribosomal protein S4-B;40S ribosomal protein S4-A	RPS4B;RPS4A		1	90.5376	8.13661e-36	174.39	126.83	172.1	1	86.373	8.13661e-36	174.39	1	90.5376	8.34456e-23	172.1	1	89.3843	1.3355e-35	170.95	1	86.2773	2.74154e-17	148.62	1	70.8077	4.23052e-08	143.17	1	73.9646	2.72898e-28	159.52	0.999999	60.9078	8.24625e-07	92.939	1	77.7891	1.58644e-13	131.79	1	67.1155	1.01488e-10	124.51	1
P0CX38;P0CX37	149;149	P0CX38	P0CX38	40S ribosomal protein S6-B;40S ribosomal protein S6-A	RPS6B;RPS6A		0.999961	44.042	1.42368e-08	97.32	86.177	97.32																													0	0		NaN
P0CX38;P0CX37	51;51	P0CX38	P0CX38	40S ribosomal protein S6-B;40S ribosomal protein S6-A	RPS6B;RPS6A		0.998617	28.585	0.00384648	58.511	47.411	58.511
P0CX38;P0CX37	131;131	P0CX38	P0CX38	40S ribosomal protein S6-B;40S ribosomal protein S6-A	RPS6B;RPS6A		0.986495	18.6359	1.19138e-05	79.462	51.43	79.462
P0CX38;P0CX37	46;46	P0CX38	P0CX38	40S ribosomal protein S6-B;40S ribosomal protein S6-A	RPS6B;RPS6A		0.999613	34.1175	0.000179269	73.405	48.192	73.405
P0CX40;P0CX39	37;37	P0CX40	P0CX40	40S ribosomal protein S8-B;40S ribosomal protein S8-A	RPS8B;RPS8A		0.990682	20.2659	0.00514095	44.457	36.072	44.457																													0	0		NaN	0	0		NaN
P0CX40;P0CX39	10;10	P0CX40	P0CX40	40S ribosomal protein S8-B;40S ribosomal protein S8-A	RPS8B;RPS8A		0.999971	45.4105	0.0015172	57.788	33.946	57.788													0	0		NaN													0	0		NaN
P0CX40;P0CX39	128;128	P0CX40	P0CX40	40S ribosomal protein S8-B;40S ribosomal protein S8-A	RPS8B;RPS8A		1	116.115	1.15548e-49	191.48	149.76	116.11	1	129.678	7.82308e-29	179.1	1	160.681	1.28276e-20	166.34	1	112.712	2.12408e-20	164.57	1	117.811	5.13338e-23	164.04	1	117.351	8.12621e-28	172.88	1	106.106	1.31214e-15	157.99	1	125.442	5.7839e-28	174.86	1	121.282	4.59214e-20	159.37	1	119.374	1.15488e-21	168.8	1
P0CX40;P0CX39	74;74	P0CX40	P0CX40	40S ribosomal protein S8-B;40S ribosomal protein S8-A	RPS8B;RPS8A		0.738062	4.49895	4.9654e-06	73.21	65.218	43.848					0.5	0	0.00326013	45.784					0.5	0	4.9654e-06	73.21					0.5	0	0.00207607	48.229													0.5
P0CX40;P0CX39	75;75	P0CX40	P0CX40	40S ribosomal protein S8-B;40S ribosomal protein S8-A	RPS8B;RPS8A		0.535643	0.620233	4.9654e-06	73.21	65.218	43.946					0.5	0	0.00326013	45.784					0.5	0	4.9654e-06	73.21					0.5	0	0.00207607	48.229													0.5
P0CX42;P0CX41	63;63	P0CX42	P0CX42	60S ribosomal protein L23-B;60S ribosomal protein L23-A	RPL23B;RPL23A		0.5	0	6.69573e-05	61.703	50.081	61.703
P0CX42;P0CX41	64;64	P0CX42	P0CX42	60S ribosomal protein L23-B;60S ribosomal protein L23-A	RPL23B;RPL23A		0.5	0	6.69573e-05	61.703	50.081	61.703
P0CX42;P0CX41	72;72	P0CX42	P0CX42	60S ribosomal protein L23-B;60S ribosomal protein L23-A	RPL23B;RPL23A		1	124.669	1.13065e-08	124.67	111.06	124.67	1	82.6078	4.15929e-06	83.397	1	75.1421	0.000991446	76.332	0	0		NaN	0	0		NaN	0	0		NaN	0.999999	59.4517	0.000715056	60.641					0.999996	53.5687	0.00186702	53.569	0.999999	62.4075	0.000499994	62.408
P0CX44;P0CX43	133;133	P0CX44	P0CX44	60S ribosomal protein L1-B;60S ribosomal protein L1-A	RPL1B;RPL1A		0.999994	52.5484	0.00107812	58.671	50.329	58.671	0	0		NaN					0	0		NaN	0	0		NaN	0	0		NaN									0	0		NaN
P0CX44;P0CX43	92;92	P0CX44	P0CX44	60S ribosomal protein L1-B;60S ribosomal protein L1-A	RPL1B;RPL1A		0.538388	0.668189	0.000662275	57.804	50.26	57.804	0	0		NaN	0	0		NaN
P0CX44;P0CX43	3;3	P0CX44	P0CX44	60S ribosomal protein L1-B;60S ribosomal protein L1-A	RPL1B;RPL1A		1	77.6494	0.000346119	77.894	36.494	77.894	0	0		NaN					0	0		NaN	0	0		NaN													0	0		NaN	0	0		NaN
P0CX44;P0CX43	118;118	P0CX44	P0CX44	60S ribosomal protein L1-B;60S ribosomal protein L1-A	RPL1B;RPL1A		0.999931	41.6144	0.000361065	65.805	63.735	65.805
P0CX46;P0CX45	92;92	P0CX46	P0CX46	60S ribosomal protein L2-B;60S ribosomal protein L2-A	RPL2B;RPL2A		0.934352	11.5329	1.10476e-06	82.034	50.896	82.034	0	0		NaN					0	0		NaN	0	0		NaN									0.931866	11.3599	0.0162079	41.383	0	0		NaN	0	0		NaN	0
P0CX46;P0CX45	93;93	P0CX46	P0CX46	60S ribosomal protein L2-B;60S ribosomal protein L2-A	RPL2B;RPL2A		1	118.866	3.79273e-15	118.87	76.471	118.87	0	0		NaN	1	118.866	3.79273e-15	118.87	0	0		NaN	0.557496	1.00324	0.00184876	63.091													0.546098	0.803081	0.0143122	63.727	0	0		NaN	0
P0CX48;P0CX47	57;57	P0CX48	P0CX48	40S ribosomal protein S11-B;40S ribosomal protein S11-A	RPS11B;RPS11A		1	102.903	8.83804e-07	102.9	97.963	102.9													0	0		NaN													0	0		NaN
P0CX48;P0CX47	43;43	P0CX48	P0CX48	40S ribosomal protein S11-B;40S ribosomal protein S11-A	RPS11B;RPS11A		0.994599	22.6519	6.63329e-05	91.584	86.102	63.534	0.957123	13.4874	0.00128765	73.885	0.963568	14.224	0.00608601	57.532	0.961044	13.9217	0.00434881	61.815	0.982556	17.5071	0.00235547	85.731	0.963568	14.224	0.00268215	57.532	0.830447	6.90006	0.0133152	48.44	0.742379	4.59644	0.00520224	50.194	0.981535	17.2556	0.000387484	73.985	0.992471	21.1999	0.00260851	57.785	0.945538
P0CX48;P0CX47	46;46	P0CX48	P0CX48	40S ribosomal protein S11-B;40S ribosomal protein S11-A	RPS11B;RPS11A		1	49.5005	3.50915e-56	200.44	156.93	49.5	1	174.824	8.38155e-45	187.44	1	185.752	3.50915e-56	200.44	1	180.536	1.66616e-55	197.56	1	97.0676	7.56121e-11	125.54	1	132.077	4.20712e-22	147.71	1	166.453	2.31169e-44	182.08	1	135.09	4.20712e-22	147.71	0	0		NaN	1	129.476	6.11785e-18	146.5	1
P0CX48;P0CX47	15;15	P0CX48	P0CX48	40S ribosomal protein S11-B;40S ribosomal protein S11-A	RPS11B;RPS11A		1	90.1838	3.13343e-76	186.05	168.9	122.46	1	72.2592	6.38653e-23	134.06	0.999745	35.9326	4.6217e-17	118.52	0.999999	60.4311	3.13343e-76	186.05	0.999325	31.7046	3.68224e-06	72.086	0.999999	62.8434	4.10444e-17	119.38	0.999977	46.3102	3.57321e-62	176.42	0.999975	46.0895	3.31506e-49	158.65	0	0		NaN	0.99999	49.9682	2.46748e-30	145.88	0.999935
P0CX48;P0CX47	36;36	P0CX48	P0CX48	40S ribosomal protein S11-B;40S ribosomal protein S11-A	RPS11B;RPS11A		0.999975	46.0642	5.16364e-06	104.22	79.367	68.626													0	0		NaN													0.998847	29.3764	0.0560141	40.589
P0CX48;P0CX47	141;141	P0CX48	P0CX48	40S ribosomal protein S11-B;40S ribosomal protein S11-A	RPS11B;RPS11A		0.999992	51.1772	0.000110643	81.311	73.555	81.311													0	0		NaN													0	0		NaN
P0CX48;P0CX47	102;102	P0CX48	P0CX48	40S ribosomal protein S11-B;40S ribosomal protein S11-A	RPS11B;RPS11A		0.999726	35.6214	0.000604872	76.943	60.565	61.56													0.999726	35.6214	0.00225679	61.56													0	0		NaN
P0CX50;P0CX49	161;161	P0CX50	P0CX50	60S ribosomal protein L18-B;60S ribosomal protein L18-A	RPL18B;RPL18A		0.999934	41.8294	0.00673706	45.915	39.88	44.616	0	0		NaN									0	0		NaN	0	0		NaN									0	0		NaN	0	0		NaN
P0CX50;P0CX49	116;116	P0CX50	P0CX50	60S ribosomal protein L18-B;60S ribosomal protein L18-A	RPL18B;RPL18A		1	112.763	1.02999e-27	135.08	90.342	135.08	1	82.2882	1.11481e-12	97.058	0	0		NaN	1	89.0816	3.61479e-13	103.85	1	89.0319	3.42322e-10	94.01	1	70.4861	7.8423e-07	78.674	1	89.8967	1.92833e-09	98.185	1	82.8481	4.42378e-08	97.618	1	74.5893	9.80405e-08	82.877	0.999912	40.5489	0.00311117	53.779	1
P0CX50;P0CX49	46;46	P0CX50	P0CX50	60S ribosomal protein L18-B;60S ribosomal protein L18-A	RPL18B;RPL18A		0.999722	35.5617	1.85508e-09	107.75	94.333	107.75													0.99964	34.4388	2.61837e-07	82.007	0.997407	25.8508	0.0031009	47.204									0.996608	24.6806	8.54287e-05	63.918
P0CX50;P0CX49	50;50	P0CX50	P0CX50	60S ribosomal protein L18-B;60S ribosomal protein L18-A	RPL18B;RPL18A		1	73.9949	5.49869e-05	109.29	98.522	109.29	0.999995	52.89	7.29222e-05	85.731	0.999874	38.9894	0.000300402	76.465	0.996459	24.4937	0.0068079	55.064	1	73.9949	5.49869e-05	109.29	0.99993	41.5694	0.000434604	76.465	0.999898	39.9312	0.000707135	71.349	0	0		NaN	0.999975	46.0672	0.00158682	72.006	0	0		NaN	0.999967
P0CX52;P0CX51	127;127	P0CX52	P0CX52	40S ribosomal protein S16-B;40S ribosomal protein S16-A	RPS16B;RPS16A		0.5	0	0.00372917	44.816	36.322	44.816													0	0		NaN													0	0		NaN	0	0		NaN	0
P0CX52;P0CX51	128;128	P0CX52	P0CX52	40S ribosomal protein S16-B;40S ribosomal protein S16-A	RPS16B;RPS16A		0.5	0	0.00372917	44.816	36.322	44.816													0	0		NaN													0	0		NaN	0	0		NaN	0
P0CX52;P0CX51	140;140	P0CX52	P0CX52	40S ribosomal protein S16-B;40S ribosomal protein S16-A	RPS16B;RPS16A		1	48.0038	0.00753623	54.7	48.04	48.004	0	0		NaN	0	0		NaN	0	0		NaN	0	0		NaN					0	0		NaN					0	0		NaN	0	0		NaN
P0CX52;P0CX51	30;30	P0CX52	P0CX52	40S ribosomal protein S16-B;40S ribosomal protein S16-A	RPS16B;RPS16A		0.999989	49.5541	0.00496229	53.909	42.92	53.909
P0CX52;P0CX51	102;102	P0CX52	P0CX52	40S ribosomal protein S16-B;40S ribosomal protein S16-A	RPS16B;RPS16A		0.994132	22.2894	0.00027082	71.03	65.31	71.03	0	0		NaN	0	0		NaN					0	0		NaN					0	0		NaN	0	0		NaN					0.971036	15.2538	0.0126813	40.727	0
P0CX52;P0CX51	14;14	P0CX52	P0CX52	40S ribosomal protein S16-B;40S ribosomal protein S16-A	RPS16B;RPS16A		0.999997	55.3526	1.62495e-06	93.959	79.083	55.353									0	0		NaN	0.999997	55.3526	0.00321999	55.353					0	0		NaN					0.999915	40.7274	0.0214526	40.727
P0CX52;P0CX51	23;23	P0CX52	P0CX52	40S ribosomal protein S16-B;40S ribosomal protein S16-A	RPS16B;RPS16A		0.988929	19.5097	1.05643e-06	103.34	83.58	69.01	0.962943	14.1473	8.29483e-05	91.937					0	0		NaN	0	0		NaN	0.982807	17.5711	0.000204044	80.979	0	0		NaN	0	0		NaN	0	0		NaN	0.986639	18.6834	1.05643e-06	103.34
P0CX52;P0CX51	26;26	P0CX52	P0CX52	40S ribosomal protein S16-B;40S ribosomal protein S16-A	RPS16B;RPS16A		0.578354	1.37246	0.00217185	66.595	44.509	47.288									0.562703	1.09504	0.00217185	66.595	0	0		NaN									0	0		NaN
P0CX52;P0CX51	12;12	P0CX52	P0CX52	40S ribosomal protein S16-B;40S ribosomal protein S16-A	RPS16B;RPS16A		0.898321	9.46201	2.51364e-06	107.09	86.709	90.15	0.768601	5.21341	0.00137873	83.869									0.884171	8.8272	0.054061	45.161	0.860899	7.91622	3.93643e-05	77.192									0.5	0	0.000329436	66.435
P0CX52;P0CX51	13;13	P0CX52	P0CX52	40S ribosomal protein S16-B;40S ribosomal protein S16-A	RPS16B;RPS16A		0.734896	6.81665	2.33699e-14	138.11	115.97	78.705	0.593227	1.63869	2.08815e-06	103.7					0.610028	1.94316	3.52734e-07	111.61									0.577598	1.359	8.25782e-05	98.249					0.5	0	0.000329436	66.435	0.593227	1.63869	1.0123e-06	103.7	0.566997
P0CX54;P0CX53	40;40	P0CX54	P0CX54	60S ribosomal protein L12-B;60S ribosomal protein L12-A	RPL12B;RPL12A		0.923085	10.7923	0.000885454	77.533	72.444	51.872									0.837919	7.13471	0.000885454	77.533	0.5	0	0.0109765	50.292	0	0		NaN									0	0		NaN	0	0		NaN
P0CX54;P0CX53	41;41	P0CX54	P0CX54	60S ribosomal protein L12-B;60S ribosomal protein L12-A	RPL12B;RPL12A		0.999925	41.2271	0.000489037	70.028	59.742	41.227	0.578433	1.37387	0.00617857	48.602					0.568441	1.19645	0.00505203	50.194	0.5	0	0.0109765	50.292	0	0		NaN	0	0		NaN					0.554007	0.941864	0.0109765	50.292	0	0		NaN
P0CX54;P0CX53	48;48	P0CX54	P0CX54	60S ribosomal protein L12-B;60S ribosomal protein L12-A	RPL12B;RPL12A		0.999941	43.2312	0.00035089	75.819	40.278	73.781	0.99976	36.2393	0.00035089	75.819	0.994334	22.5004	0.0189284	51.841	0.999368	32.6184	0.00542993	68.44	0.998919	29.7469	0.00628157	61.435	0.997496	26.5126	0.0319043	48.568	0.992979	21.5174	0.012487	57.802	0.998604	29.2778	0.0214114	52.247	0.999941	43.2312	0.00311043	73.781	0.998717	28.993	0.0101016	59.198
P0CX54;P0CX53	99;99	P0CX54	P0CX54	60S ribosomal protein L12-B;60S ribosomal protein L12-A	RPL12B;RPL12A		1	47.559	2.12519e-07	87.352	67.275	47.559	0	0		NaN					1	70.9415	0.00191711	70.942	0	0		NaN	0	0		NaN									0	0		NaN	0	0		NaN
P0CX54;P0CX53	130;130	P0CX54	P0CX54	60S ribosomal protein L12-B;60S ribosomal protein L12-A	RPL12B;RPL12A		1	45.257	0.00221849	54.958	28.239	45.257	0	0		NaN					0	0		NaN																					1	45.9154	0.0144345	45.915
P0CX56;P0CX55	108;108	P0CX56	P0CX56	40S ribosomal protein S18-B;40S ribosomal protein S18-A	RPS18B;RPS18A		1	80.548	1.30886e-06	86.453	59.616	81.92	1	80.548	0.00129144	81.92									0.930383	11.2595	5.02691e-06	73.918	0.999991	50.5032	0.0226308	51.875	0	0		NaN	0	0		NaN					0	0		NaN	0
P0CX56;P0CX55	117;117	P0CX56	P0CX56	40S ribosomal protein S18-B;40S ribosomal protein S18-A	RPS18B;RPS18A		0.82045	6.59867	0.000173611	60.034	52.231	48.112													0	0		NaN	0	0		NaN	0	0		NaN	0	0		NaN					0	0		NaN	0
P0CX56;P0CX55	48;48	P0CX56	P0CX56	40S ribosomal protein S18-B;40S ribosomal protein S18-A	RPS18B;RPS18A		0.906803	9.88111	0.000182709	66.498	55.239	41.109					0.520847	0.362364	0.00714716	40.475	0	0		NaN	0	0		NaN	0	0		NaN					0	0		NaN	0	0		NaN	0	0		NaN
P0CX56;P0CX55	49;49	P0CX56	P0CX56	40S ribosomal protein S18-B;40S ribosomal protein S18-A	RPS18B;RPS18A		0.928043	11.105	0.00142598	51.218	34.276	51.218	0.928043	11.105	0.00142598	51.218					0.894309	9.27449	0.00165807	50.675	0	0		NaN	0	0		NaN					0	0		NaN	0	0		NaN	0	0		NaN	0.526671
P0CX56;P0CX55	96;96	P0CX56	P0CX56	40S ribosomal protein S18-B;40S ribosomal protein S18-A	RPS18B;RPS18A		0.999997	55.3331	2.60747e-14	99.135	92.702	73.781	0.99976	36.1995	3.11969e-14	98	0.999762	36.2316	5.79143e-13	90.097	0.99852	28.2904	2.16465e-06	68.074	0.999932	41.6499	2.45867e-09	79.558					0.999528	33.257	8.9224e-13	88.001
P0CX81;P0CX80	49;49	P0CX81	P0CX81	Copper metallothionein 1-2;Copper metallothionein 1-1	CUP1-2;CUP1-1		0.999999	60.009	4.43772e-06	104.43	97.461	104.43
P0CX81;P0CX80	30;30	P0CX81	P0CX81	Copper metallothionein 1-2;Copper metallothionein 1-1	CUP1-2;CUP1-1		1	152.085	8.94048e-118	228.85	220.36	228.85																													1	73.6413	3.62221e-14	111.66	1	106.126	2.37545e-38	139.11	0.999997
P0CX81;P0CX80	43;43	P0CX81	P0CX81	Copper metallothionein 1-2;Copper metallothionein 1-1	CUP1-2;CUP1-1		0.995566	23.5123	0.0019215	55.33	44.846	55.33																					0.995566	23.5123	0.0019215	55.33
P0CX83;P0CX82	8;8	P0CX83	P0CX83	60S ribosomal protein L19-B;60S ribosomal protein L19-A	RPL19B;RPL19A		0.999997	55.0985	0.000262922	63.918	52.149	63.918													0	0		NaN
P0CX83;P0CX82	19;19	P0CX83	P0CX83	60S ribosomal protein L19-B;60S ribosomal protein L19-A	RPL19B;RPL19A		0.959727	13.7713	0.000245111	63.727	35.328	52.071	0	0		NaN	0	0		NaN	0	0		NaN	0	0		NaN	0	0		NaN	0	0		NaN					0	0		NaN	0	0		NaN	0
P0CX83;P0CX82	60;60	P0CX83	P0CX83	60S ribosomal protein L19-B;60S ribosomal protein L19-A	RPL19B;RPL19A		0.815656	6.45879	2.91742e-07	85.493	67.036	59.862
P0CX83;P0CX82	70;70	P0CX83	P0CX83	60S ribosomal protein L19-B;60S ribosomal protein L19-A	RPL19B;RPL19A		0.635984	2.42326	0.00164056	55.885	31.327	44.294													0.635984	2.42326	0.00674172	44.294													0.616245	2.057	0.00164056	55.885
P0CX83;P0CX82	135;135	P0CX83	P0CX83	60S ribosomal protein L19-B;60S ribosomal protein L19-A	RPL19B;RPL19A		0.999976	46.1586	0.00443848	46.159	36.359	46.159
P0CX83;P0CX82	125;125	P0CX83	P0CX83	60S ribosomal protein L19-B;60S ribosomal protein L19-A	RPL19B;RPL19A		1	51.8544	0.000280386	70.942	63.076	51.854	0	0		NaN					0	0		NaN					0	0		NaN													0	0		NaN
P0CX83;P0CX82	186;186	P0CX83	P0CX83	60S ribosomal protein L19-B;60S ribosomal protein L19-A	RPL19B;RPL19A		1	101.896	0.000992128	103.55	93.132	101.9	1	92.0512	0.000924807	92.051	1	83.7828	0.00079535	83.783	1	83.7828	0.00079535	83.783	1	48.091	0.00516803	79.474	1	76.6789	0.00122902	86.136	1	78.1489	0.00113013	80.755	1	83.7828	0.00079535	83.783	1	51.2675	0.00122902	76.679	1	84.6146	0.000808373	84.615	1
P0CX83;P0CX82	21;21	P0CX83	P0CX83	60S ribosomal protein L19-B;60S ribosomal protein L19-A	RPL19B;RPL19A		0.545025	0.784281	0.000245111	63.727	44.456	50.207	0	0		NaN	0	0		NaN	0	0		NaN					0	0		NaN	0	0		NaN					0	0		NaN	0	0		NaN	0
P0CX83;P0CX82	43;43	P0CX83	P0CX83	60S ribosomal protein L19-B;60S ribosomal protein L19-A	RPL19B;RPL19A		0.764764	5.12023	0.00204924	58.479	33.123	58.479
P0CX85;P0CX84	5;5	P0CX85	P0CX85	60S ribosomal protein L35-B;60S ribosomal protein L35-A	RPL35B;RPL35A		0.999999	61.9633	4.21441e-05	79.659	64.508	72.289	0.999997	54.6997	0.000461419	69.261	0.998014	27.0112	0.0496207	43.544	0.999997	55.3156	4.21441e-05	79.659	0.99989	39.5812	0.00835647	46.844	0.999543	33.4015	0.00617137	49.934	0.998771	29.0976	0.0101556	44.299	0.998844	29.3667	0.00507083	51.841					0.999498	32.9912	0.0104403	43.897	0
P0CX85;P0CX84	71;71	P0CX85	P0CX85	60S ribosomal protein L35-B;60S ribosomal protein L35-A	RPL35B;RPL35A		0.874882	8.44628	0.00221944	65.305	50.632	56.729	0	0		NaN									0	0		NaN	0	0		NaN									0	0		NaN	0	0		NaN	0
P0CX85;P0CX84	73;73	P0CX85	P0CX85	60S ribosomal protein L35-B;60S ribosomal protein L35-A	RPL35B;RPL35A		0.567604	1.18164	0.000344069	62.362	43.739	62.362	0	0		NaN									0	0		NaN	0	0		NaN									0	0		NaN	0	0		NaN	0
P0CX85;P0CX84	32;32	P0CX85	P0CX85	60S ribosomal protein L35-B;60S ribosomal protein L35-A	RPL35B;RPL35A		0.99939	32.1461	0.00139207	78.324	45.969	74.255																									0	0		NaN									0
P0CX85;P0CX84	25;25	P0CX85	P0CX85	60S ribosomal protein L35-B;60S ribosomal protein L35-A	RPL35B;RPL35A		0.99518	23.1486	4.46137e-78	218.15	196.06	123.63	0.960439	13.852	3.7009e-19	166.97	0.931673	11.3467	5.31611e-31	173.71	0.955097	13.2777	1.40447e-24	166.7	0.994436	22.5217	1.65847e-23	192.38	0.937722	11.7774	1.89855e-28	210.87	0.921622	10.7036	1.34681e-40	188.28	0.91638	10.3976	8.90401e-19	160.36	0.992618	21.2861	1.36011e-13	160.22	0.920049	10.6099	1.65847e-23	163.99	0.954287
P0CX85;P0CX84	26;26	P0CX85	P0CX85	60S ribosomal protein L35-B;60S ribosomal protein L35-A	RPL35B;RPL35A		1	70.9086	2.10215e-10	133.81	108.25	83.265	0	0		NaN	0.999999	61.916	0.0585387	72.789					0.999999	58.7743	0.0524507	75.738	0	0		NaN	1	70.9086	0.0369161	83.265	0	0		NaN					0	0		NaN	0
P0CX85;P0CX84	103;103	P0CX85	P0CX85	60S ribosomal protein L35-B;60S ribosomal protein L35-A	RPL35B;RPL35A		0.810973	7.72666	0.001719	57.175	50.697	57.175	0.487852	0	0.00714859	47.712	0	0		NaN	0	0		NaN	0	0		NaN	0	0		NaN					0	0		NaN	0	0		NaN					0
P0CX85;P0CX84	106;106	P0CX85	P0CX85	60S ribosomal protein L35-B;60S ribosomal protein L35-A	RPL35B;RPL35A		0.539968	0.695792	0.00183823	59.57	37.494	47.288	0.487852	0	0.00714859	47.712	0	0		NaN	0	0		NaN	0	0		NaN	0	0		NaN					0	0		NaN	0	0		NaN					0
P0CX85;P0CX84	107;107	P0CX85	P0CX85	60S ribosomal protein L35-B;60S ribosomal protein L35-A	RPL35B;RPL35A		1	75.7294	0.000775302	83.948	72.415	83.948	0.999999	61.6019	0.00364647	61.602	0	0		NaN	0.999997	55.1172	0.0028717	58.23	0.999911	40.5023	0.0269287	40.502	0.999987	48.8411	0.00672665	51.113	0.999997	55.5671	0.00358806	55.567	0.999994	52.255	0.00409197	52.255	0.999998	57.5896	0.00614476	57.59	1	67.7184	0.00124464	68.625	0.999998
P0CX85;P0CX84	43;43	P0CX85	P0CX85	60S ribosomal protein L35-B;60S ribosomal protein L35-A	RPL35B;RPL35A		0.997877	26.7205	0.000503577	70.028	61.024	70.028													0.970045	15.1032	0.0118398	43.308													0.978873	16.659	0.0162317	44.863
P0CX85;P0CX84	14;14	P0CX85	P0CX85	60S ribosomal protein L35-B;60S ribosomal protein L35-A	RPL35B;RPL35A		1	67.3984	0.000658609	70.26	45.845	70.26	0	0		NaN	0	0		NaN					0	0		NaN	0	0		NaN									0.999942	44.1762	0.0132366	47.037	0	0		NaN	0
P0CX85;P0CX84	94;94	P0CX85	P0CX85	60S ribosomal protein L35-B;60S ribosomal protein L35-A	RPL35B;RPL35A		1	66.7791	6.99892e-05	66.779	61.975	66.779
P0CY07;P0CY06	13;13	P0CY07	P0CY07	Silenced mating-type protein ALPHA1;Mating-type protein ALPHA1	HMLALPHA1;MATALPHA1		0.903891	11.3559	0.00278625	51.092	40.568	44.765																					0	0		NaN					0.790949	7.50087	0.0111614	40.589
P10080	199	P10080	P10080	Single-stranded nucleic acid-binding protein	SBP1		1	67.9808	1.00647e-06	76.417	69.753	67.981													0	0		NaN
P10080	92	P10080	P10080	Single-stranded nucleic acid-binding protein	SBP1		0.999999	59.5097	9.18539e-06	87.001	62.709	85.522													0	0		NaN	0	0		NaN									0.999494	32.9545	0.0217534	41.684
P10080	292	P10080	P10080	Single-stranded nucleic acid-binding protein	SBP1		1	45.6847	0.000714648	45.685	36.463	45.685
P10081	226	P10081	P10081	ATP-dependent RNA helicase eIF4A	TIF1		0.999958	43.7569	0.00751919	46.706	29.32	46.706																													0	0		NaN
P10081	284	P10081	P10081	ATP-dependent RNA helicase eIF4A	TIF1		1	91.4567	5.04826e-09	91.457	67.73	91.457
P10363	395	P10363	P10363	DNA primase small subunit	PRI1		1	78.0879	1.83204e-13	104.03	88.772	78.088	1	51.3476	0.000690251	51.348	1	47.8137	0.00231304	47.814	1	68.9516	2.1926e-05	68.952	1	45.0469	0.00367442	45.047	1	104.026	2.30932e-10	104.03	1	102.068	1.83204e-13	102.07	1	52.6119	1.55842e-07	86.727	1	83.2132	2.38909e-07	83.213	1	42.7114	0.000133555	63.918	1
P10591;P09435;P10592;P22202	504;505;504;505	P10591;P10592;P22202	P10591	Heat shock protein SSA1;Heat shock protein SSA3;Heat shock protein SSA2;Heat shock protein SSA4	SSA1;SSA3;SSA2;SSA4		0.997081	25.3355	8.55358e-05	86.114	44.41	72.29	0	0		NaN									0.823462	6.68804	0.00407043	62.14	0	0		NaN	0	0		NaN					0.873661	8.39807	0.00868904	40.727					0
P10591;P09435;P10592;P22202	509;510;509;510	P10591;P10592;P22202	P10591	Heat shock protein SSA1;Heat shock protein SSA3;Heat shock protein SSA2;Heat shock protein SSA4	SSA1;SSA3;SSA2;SSA4		0.552221	0.910496	0.00340009	55.452	45.919	49.35													0	0		NaN					0	0		NaN
P10591	584	P10591	P10591	Heat shock protein SSA1	SSA1		0.999963	44.2913	9.10378e-25	133.95	115.89	124.26	0.999963	44.2913	2.08606e-21	124.26	0.998975	29.8868	7.99572e-14	104.89	0.999272	31.3743	9.10378e-25	133.95	0.999933	41.7391	3.60561e-11	99.366					0.779124	5.47458	0.00905729	42.711					0	0		NaN	0	0		NaN	0
P10591;P10592	322;322	P10591;P10592	P10591	Heat shock protein SSA1;Heat shock protein SSA2	SSA1;SSA2		0.999958	43.7366	0.00190267	64.04	44.279	64.04					0	0		NaN	0	0		NaN	0	0		NaN	0	0		NaN	0	0		NaN	0	0		NaN					0	0		NaN
P10592	584	P10592	P10592	Heat shock protein SSA2	SSA2		0.999994	51.9499	5.94795e-31	127.5	104.6	127.5					0.999994	51.9499	5.94795e-31	127.5					0.999935	41.8505	1.82829e-23	116.21
P10622	51	P10622	P10622	60S acidic ribosomal protein P1-beta	RPP1B		1	107.895	0.00269772	107.9	43.138	107.9	1	85.0639	0.00470147	85.064	0.967265	14.7054	0.00269772	94.302	1	107.895	0.00424092	107.9	0.985408	18.2951	0.00413473	75.854	0.984295	17.9708	0.00756124	65.038	0.984806	18.1167	0.0467957	74.127	0.974904	15.8936	0.00747894	65.252					0	0		NaN	0
P10664;P49626	321;321	P10664	P10664	60S ribosomal protein L4-A;60S ribosomal protein L4-B	RPL4A;RPL4B		1	63.0995	0.000476257	90.653	44.863	90.653	0	0		NaN	0	0		NaN	0.999973	45.6822	0.00718122	50.484	0.999999	62.9444	0.00154564	66.262	0	0		NaN	0	0		NaN	0	0		NaN	0	0		NaN	0	0		NaN	0
P10664;P49626	332;332	P10664	P10664	60S ribosomal protein L4-A;60S ribosomal protein L4-B	RPL4A;RPL4B		1	120.271	3.60611e-96	215.23	210.96	202.44	1	87.9331	2.40179e-82	205.95	1	67.8519	3.60611e-96	215.23	0.999997	55.4619	5.17687e-61	197.15	1	120.271	7.62308e-82	202.44	1	64.1989	1.16271e-60	196.64	1	63.6297	6.45749e-60	193.69	1	63.3482	5.67966e-70	192.24	0.999997	54.93	5.09472e-42	164.41	0.999998	56.9714	3.13003e-82	204.13	0.999998
P10664;P49626	338;338	P10664	P10664	60S ribosomal protein L4-A;60S ribosomal protein L4-B	RPL4A;RPL4B		0.990303	20.0915	0.0012676	63.32	49.551	54.784					0	0		NaN													0	0		NaN
P10664	350	P10664	P10664	60S ribosomal protein L4-A	RPL4A		1	78.1439	0.000129904	78.191	66.751	78.191	0	0		NaN																	0	0		NaN					0	0		NaN
P10962	286	P10962	P10962	Protein MAK16	MAK16		1	46.3527	5.37877e-16	109.5	68.187	46.353	1	46.3527	0.00250494	46.353
P10963	456	P10963	P10963	Phosphoenolpyruvate carboxykinase [ATP]	PCK1		0.866872	8.13687	0.000128411	60.398	46.807	58.964
P10963	461	P10963	P10963	Phosphoenolpyruvate carboxykinase [ATP]	PCK1		1	51.6448	0.000128411	60.398	46.807	51.645	1	51.6448	0.000955788	51.645									0	0		NaN
P10963	75	P10963	P10963	Phosphoenolpyruvate carboxykinase [ATP]	PCK1		0.999999	59.2647	0.00261308	61.48	45.616	59.265	0.999999	58.2739	0.00261308	61.48	0	0		NaN	0.999998	57.0799	0.00303302	57.175	0.999994	52.2469	0.00491575	52.247					0	0		NaN	0	0		NaN	0	0		NaN	0	0		NaN	0
P10963	84	P10963	P10963	Phosphoenolpyruvate carboxykinase [ATP]	PCK1		1	70.1001	0.001381	94.297	65.339	70.1	1	77.6774	0.00808469	77.677	1	94.2966	0.001381	94.297	1	70.1001	0.017531	70.1	0	0		NaN					0	0		NaN	0	0		NaN	0	0		NaN	0	0		NaN	0
P10963	51	P10963	P10963	Phosphoenolpyruvate carboxykinase [ATP]	PCK1		0.999999	58.5774	0.000236892	66.12	33.496	58.577	0.999999	58.5774	0.000236892	58.577									0	0		NaN
P10963	67	P10963	P10963	Phosphoenolpyruvate carboxykinase [ATP]	PCK1		0.998467	28.1366	1.62164e-10	96.391	77.92	95.554	0.852407	7.6158	4.0778e-10	87.772									0	0		NaN													0	0		NaN
P10963	290	P10963	P10963	Phosphoenolpyruvate carboxykinase [ATP]	PCK1		0.999989	49.6419	0.00083631	68.83	63.446	64.244	0.999744	35.9129	0.0147227	47.621					0.999989	49.6419	0.00148588	64.244	0.999969	45.0418	0.00479768	56.482													0.999786	36.7006	0.0378768	48.14	0	0		NaN
P10963	307	P10963	P10963	Phosphoenolpyruvate carboxykinase [ATP]	PCK1		1	54.6078	1.03844e-05	131.82	80.473	54.608	1	131.819	1.03844e-05	131.82	0	0		NaN	1	66.4345	0.0186338	66.435																					0	0		NaN	0
P10963	188	P10963	P10963	Phosphoenolpyruvate carboxykinase [ATP]	PCK1		1	49.8878	6.65329e-05	68.516	58	49.888													1	68.5156	6.65329e-05	68.516
P10963	514	P10963	P10963	Phosphoenolpyruvate carboxykinase [ATP]	PCK1		1	94.5032	2.89127e-22	124.31	112.52	113.29	0.999795	36.8786	0.00170543	50.053									0	0		NaN	0	0		NaN
P10963	531	P10963	P10963	Phosphoenolpyruvate carboxykinase [ATP]	PCK1		1	55.0331	1.55898e-09	78.415	46.492	55.033	1	55.0331	3.53441e-05	59.837									0	0		NaN	0	0		NaN
P10963	493	P10963	P10963	Phosphoenolpyruvate carboxykinase [ATP]	PCK1		0.9848	18.1151	0.00759831	43.523	36.725	43.523	0.9848	18.1151	0.00759831	43.523
P10963	73	P10963	P10963	Phosphoenolpyruvate carboxykinase [ATP]	PCK1		0.623112	2.18354	9.25146e-06	70.99	60.891	45.347									0.590644	1.59224	9.25146e-06	70.99	0.586777	1.52288	0.000190945	59.512													0	0		NaN
P11412	302	P11412	P11412	Glucose-6-phosphate 1-dehydrogenase	ZWF1		1	112.825	2.86888e-18	129.32	111.22	129.32	1	99.1121	1.2764e-12	121.27	1	83.4172	7.40123e-09	94.01	1	98.7416	1.6914e-12	119.68	0.999996	53.473	0.000927128	58.577	1	75.262	1.33998e-07	90.654	1	81.8911	2.6151e-08	106.94	1	81.8655	2.29116e-07	88.133	1	71.3951	0.000118459	81.317	1	79.8825	6.71679e-06	95.767	1
P40150;P11484	603;603	P40150	P40150	Heat shock protein SSB2;Heat shock protein SSB1	SSB2;SSB1		0.981499	17.2469	0.00278034	57.836	27.582	57.836	0	0		NaN	0	0		NaN	0	0		NaN	0	0		NaN					0	0		NaN	0	0		NaN	0	0		NaN
P40150;P11484	194;194	P40150	P40150	Heat shock protein SSB2;Heat shock protein SSB1	SSB2;SSB1		0.514018	0.243576	0.005942	48.204	22.198	48.204
P40150;P11484	530;530	P40150	P40150	Heat shock protein SSB2;Heat shock protein SSB1	SSB2;SSB1		0.99989	39.5996	0.0032158	58.461	35.125	58.461
P40150;P11484	565;565	P40150	P40150	Heat shock protein SSB2;Heat shock protein SSB1	SSB2;SSB1		0.941619	12.076	0.000574909	60.034	50.871	45.28									0.941619	12.076	0.0169508	45.28
P40150;P11484	567;567	P40150	P40150	Heat shock protein SSB2;Heat shock protein SSB1	SSB2;SSB1		0.538035	0.662014	2.11875e-09	85.808	76.644	85.808
P11491	224	P11491	P11491	Repressible alkaline phosphatase;Soluble alkaline phosphatase	PHO8		1	108.336	5.88783e-06	111.12	52.449	111.12																	0	0		NaN	0	0		NaN	0	0		NaN					0	0		NaN
P11632	53	P11632	P11632	Non-histone chromosomal protein 6A	NHP6A		0.5	0	3.33954e-05	70.335	61.289	70.335
P11632	54	P11632	P11632	Non-histone chromosomal protein 6A	NHP6A		0.5	0	3.33954e-05	70.335	61.289	70.335
P11938	246	P11938	P11938	DNA-binding protein RAP1	RAP1		1	43.8882	3.70084e-53	173.73	104.34	43.888	1	67.1694	0.00428734	113.41	1	57.0474	0.00428734	113.41	1	121.744	0.00331137	121.74	1	61.9623	0.00672529	82.452	1	73.2601	0.000292199	150.05	1	75.2127	0.000483295	142.79	1	73.6646	9.15951e-05	173.73	1	137.904	0.000700022	137.9	1	78.3235	0.00159712	132.08	1
P11938	426	P11938	P11938	DNA-binding protein RAP1	RAP1		0.999989	49.4587	0.00283264	57.434	32.505	57.434																									0	0		NaN
P11938	118	P11938	P11938	DNA-binding protein RAP1	RAP1		0.999993	51.2623	0.006984	53.377	46.649	53.377
P11938	735	P11938	P11938	DNA-binding protein RAP1	RAP1		0.999989	49.3986	6.48206e-06	75.82	49.406	75.82
P11938	423	P11938	P11938	DNA-binding protein RAP1	RAP1		0.968569	14.8877	0.00411619	58.071	37.118	58.071
P11938	240	P11938	P11938	DNA-binding protein RAP1	RAP1		1	43.8882	0.000320508	67.864	61.889	43.888																	0	0		NaN					0	0		NaN	0	0		NaN
P11978	685	P11978	P11978	Regulatory protein SIR4	SIR4		0.968367	15.3871	0.000160661	74.993	49.826	74.993
P11978	654	P11978	P11978	Regulatory protein SIR4	SIR4		1	128.861	1.25982e-69	200	122.26	128.86	0.999836	37.8716	2.38321e-06	97.384	0.999805	37.0913	7.03585e-09	110.26	0.999999	58.2847	1.97517e-46	159.95	0.999925	41.2289	6.96635e-13	120.24	0.999998	57.4329	3.05946e-13	123.55	0.999958	43.7337	1.45577e-19	136.04	0.999629	34.3011	4.97884e-09	111.77	0.999868	38.8093	9.88415e-19	131.25	1	110.612	1.38775e-26	144.68	0.999888
P11978	658	P11978	P11978	Regulatory protein SIR4	SIR4		1	106.506	3.60587e-05	118.87	87.992	118.87					0	0		NaN	0.999999	62.4945	0.00428325	67.252	0	0		NaN	0.999872	38.9429	0.00927119	41.577	0.999991	50.4337	0.000926532	57.804	0.999967	44.7935	0.00394108	48.112	0.999905	40.2245	0.0132269	45.115	0.999996	54.3364	0.00072694	59.227	0
P11978	638	P11978	P11978	Regulatory protein SIR4	SIR4		0.999999	60.2417	0.000141895	86.39	62.199	86.39																					0	0		NaN					0	0		NaN					0
P11978	649	P11978	P11978	Regulatory protein SIR4	SIR4		0.999636	34.3895	0.00310326	59.709	45.918	59.709
P11978	600	P11978	P11978	Regulatory protein SIR4	SIR4		1	79.5388	1.28915e-05	87.088	53.863	87.088
P11978	1267	P11978	P11978	Regulatory protein SIR4	SIR4		1	70.3306	0.000238537	78.244	59.649	78.244									0	0		NaN	0	0		NaN
P11978	237	P11978	P11978	Regulatory protein SIR4	SIR4		0.985017	18.1813	0.000727686	114.86	89.732	94.409	0	0		NaN	0	0		NaN	0	0		NaN									0	0		NaN	0	0		NaN	0	0		NaN	0	0		NaN	0
P11978	240	P11978	P11978	Regulatory protein SIR4	SIR4		0.999953	43.2824	0.000989751	118.5	80.768	118.5	0	0		NaN	0	0		NaN	0	0		NaN					0.894506	9.28982	0.00988146	61.78	0	0		NaN	0.914626	10.3006	0.00759975	65.535	0	0		NaN	0.855525	7.72499	0.00527502	69.375	0.940731
P11978	19	P11978	P11978	Regulatory protein SIR4	SIR4		1	78.5161	2.40262e-05	91.207	82.865	78.516					0	0		NaN	0	0		NaN					0	0		NaN	0	0		NaN	0	0		NaN	0	0		NaN	0	0		NaN	0
P11978	26	P11978	P11978	Regulatory protein SIR4	SIR4		0.999872	39.2284	6.32544e-05	84.842	67.44	84.842					0	0		NaN	0	0		NaN					0	0		NaN	0	0		NaN	0	0		NaN	0	0		NaN	0	0		NaN	0
P11978	226	P11978	P11978	Regulatory protein SIR4	SIR4		0.639796	2.49492	0.000150131	96.993	79.591	78.069
P11978	877	P11978	P11978	Regulatory protein SIR4	SIR4		0.5	0	0.000152553	62.706	40.509	62.706
P11978	878	P11978	P11978	Regulatory protein SIR4	SIR4		0.561326	1.07073	1.59093e-21	107.29	72.466	77.593
P11978	1256	P11978	P11978	Regulatory protein SIR4	SIR4		1	91.0686	0.000118163	97.857	61.156	91.069	0	0		NaN	0.999914	40.6353	0.0362559	41.825	0.999994	51.8894	0.00800963	61.423					0	0		NaN	1	67.2609	0.00309759	71.806	0.999914	40.6437	0.0327683	43.594					0.999994	52.0927	0.0112095	58.04	0.999944
P11978	49	P11978	P11978	Regulatory protein SIR4	SIR4		0.952076	12.9812	4.29763e-05	104.52	96.956	91.636																													0	0		NaN
P11978	51	P11978	P11978	Regulatory protein SIR4	SIR4		0.89918	9.50299	0.00257346	77.677	57.891	76.465																													0	0		NaN
P11978	106	P11978	P11978	Regulatory protein SIR4	SIR4		0.999962	44.2366	0.000372857	75.911	54.852	75.911
P11978	359	P11978	P11978	Regulatory protein SIR4	SIR4		0.999992	50.8015	0.000184839	66.533	50.569	59.116									0	0		NaN									0	0		NaN									0	0		NaN	0
P11978	906	P11978	P11978	Regulatory protein SIR4	SIR4		0.978469	16.5748	0.00550696	45.915	38.46	45.915
P11978	1139	P11978	P11978	Regulatory protein SIR4	SIR4		0.980086	16.9706	0.000329197	68.401	41.552	68.401
P11978	1150	P11978	P11978	Regulatory protein SIR4	SIR4		0.994846	22.8559	0.000556001	73.464	49.984	73.464
P11978	71	P11978	P11978	Regulatory protein SIR4	SIR4		0.999999	59.4416	1.56237e-79	194.25	180.93	176.53	0	0		NaN					0.998461	28.12	1.03473e-38	129.9	0	0		NaN	0.989242	20.1713	1.09378e-05	65.425	0.994943	22.9394	8.78503e-21	106.93	0.99829	27.9068	5.21006e-06	69.947	0	0		NaN	0.988025	19.165	8.56858e-08	78.489	0.948136
P11978	82	P11978	P11978	Regulatory protein SIR4	SIR4		0.99868	29.9247	0.00472943	81.017	28.3	81.017
P11978	633	P11978	P11978	Regulatory protein SIR4	SIR4		0.997651	27.3538	0.00559975	53.001	44.824	53.001																					0	0		NaN					0	0		NaN					0
P11978	184	P11978	P11978	Regulatory protein SIR4	SIR4		1	64.9821	2.00786e-08	127.71	78.527	127.71									0	0		NaN	0	0		NaN	0	0		NaN	0.996073	24.0428	0.000152583	68.034	0	0		NaN					0.981242	17.186	0.000100941	70.438	0
P11978	15	P11978	P11978	Regulatory protein SIR4	SIR4		0.999823	37.5302	5.3349e-05	85.522	74.577	85.522																	0	0		NaN													0	0		NaN	0
P11978	699	P11978	P11978	Regulatory protein SIR4	SIR4		1	70.6796	3.67953e-06	101.39	86.122	70.68					1	84.2973	9.45564e-05	84.297	1	101.388	3.67953e-06	101.39	1	86.6992	7.70896e-05	86.699	1	89.46	5.70132e-05	89.46	1	101.32	9.09906e-06	101.32	1	80.9051	0.000229698	80.905	1	70.6796	0.000929145	70.68	1	58.9963	0.00330182	58.996	1
P11978	791	P11978	P11978	Regulatory protein SIR4	SIR4		0.997643	26.2652	0.000586192	56.851	49.481	40.52					0	0		NaN	0.950635	12.8459	0.000586192	56.851									0.997643	26.2652	0.0130447	42.913									0	0		NaN
P12383	99	P12383	P12383	Transcription factor PDR1	PDR1		1	69.8246	9.07631e-85	164.96	121.71	69.825	1	156.347	1.63416e-52	156.35	1	106.599	9.07631e-85	161.55	1	136.566	9.72712e-85	161.01	1	60.9103	0.0404363	60.91	1	118.334	6.95408e-17	118.33	1	87.3592	2.23756e-23	97.893	0.999988	49.3544	4.95728e-05	54.05	0	0		NaN	1	149.816	1.57092e-65	149.82	1
P12709	35	P12709	P12709	Glucose-6-phosphate isomerase	PGI1		1	90.7062	1.831e-10	142	126.62	90.706	1	100.755	1.831e-10	142	0.999962	44.1542	9.30785e-05	101.25	1	124.343	1.86674e-08	129.85	1	114.186	2.02327e-05	114.19	1	105.2	1.74917e-06	123.63	1	76.1686	9.04178e-08	129.85	1	92.4666	3.35106e-09	136.63	0.999884	39.3503	0.000170547	75.294	1	114.186	5.35131e-05	114.19	1
P12887	58	P12887	P12887	Uracil-DNA glycosylase	UNG1		0.997937	26.845	9.2429e-08	106.16	85.788	106.16
P12954	1140	P12954	P12954	ATP-dependent DNA helicase SRS2	SRS2		0.931616	11.343	2.61704e-10	105.32	100.97	60.669
P12954	1142	P12954	P12954	ATP-dependent DNA helicase SRS2	SRS2		1	175.821	4.85105e-67	202.95	188.26	183.65																	0	0		NaN	0	0		NaN					0	0		NaN	1	161.726	4.0108e-47	162.33	1
P12954	1089	P12954	P12954	ATP-dependent DNA helicase SRS2	SRS2		1	84.4931	1.63283e-57	198.49	180.25	84.493																	1	79.5108	6.28835e-07	79.511	1	76.0266	1.18115e-06	76.027	1	45.6082	0.00645761	45.608					1	153.25	2.17728e-34	153.25	1
P12954	1081	P12954	P12954	ATP-dependent DNA helicase SRS2	SRS2		1	190.655	4.20241e-48	195.27	140.85	195.27																	1	67.8687	0.000434284	72.652	1	122.691	2.34681e-06	122.69	0	0		NaN					1	128.015	1.13988e-07	128.01	1
P13099	213	P13099	P13099	DNA topoisomerase 3	TOP3		0.999038	30.166	4.48934e-05	74.987	68.384	73.927
P13099	339	P13099	P13099	DNA topoisomerase 3	TOP3		1	66.4657	3.53681e-05	71.558	62.394	71.558
P13382	199	P13382	P13382	DNA polymerase alpha catalytic subunit A	POL1		1	72.0138	0.000144953	76.465	62.308	76.465																	0.999975	45.9965	0.0179334	45.997	1	72.0138	0.000144953	76.465					0	0		NaN
P13393	8	P13393	P13393	TATA-box-binding protein	SPT15		1	52.7161	2.9537e-05	108.74	50.783	52.716	1	93.1779	4.75433e-05	96.015	1	104.2	0.000101854	104.2	1	108.743	3.87531e-05	108.74	1	81.9717	0.000496638	81.972	1	97.4306	0.00137915	97.431	1	85.6757	0.000364641	85.676	1	96.0336	0.00112523	96.034	1	90.6566	2.9537e-05	90.657	1	97.635	0.000663257	97.635	1
P13393	47	P13393	P13393	TATA-box-binding protein	SPT15		1	74.2222	1.98583e-39	130.9	119.37	92.295	1	64.045	4.31387e-10	93.348	0.978026	16.4845	3.87602e-29	117.36	1	74.2222	1.98583e-39	130.9	0.999999	59.1974	3.39799e-14	97.346	0.980912	17.1107	0.000359403	55.985	0	0		NaN	0.999591	33.8766	0.00279934	47.237	0.959655	13.7749	0.000363303	55.881	0.999962	44.1589	7.5634e-05	67.385	0
P13393	15	P13393	P13393	TATA-box-binding protein	SPT15		1	80.3867	1.00079e-16	127.75	109.34	80.387	1	107.825	5.8697e-12	107.82	1	124.251	4.63097e-15	124.25	1	127.753	1.00079e-16	127.75	0	0		NaN	1	68.4126	0.000555538	68.413	1	70.197	0.000368906	70.197	1	86.3775	1.92672e-06	86.378	1	88.7681	1.33865e-06	88.768	1	94.0069	4.99011e-08	94.007	1
P13393	156	P13393	P13393	TATA-box-binding protein	SPT15		1	70.6846	7.88947e-07	88.385	77.441	88.385									0	0		NaN	0	0		NaN													0	0		NaN
P13393	35	P13393	P13393	TATA-box-binding protein	SPT15		1	150.224	3.2053e-37	160.47	146.84	160.47	1	113.465	7.8994e-31	134.06	1	103.305	5.18545e-34	148.91	1	150.224	3.2053e-37	160.47	1	96.68	3.38469e-17	111.57	1	85.9516	8.16048e-13	100.39	1	89.2985	8.19921e-17	105.79	1	76.9534	8.16048e-13	100.39	1	63.8759	1.64849e-06	75.533	1	104.974	2.84523e-23	122.57	1
P13393	97	P13393	P13393	TATA-box-binding protein	SPT15		0.994451	22.5339	0.006467	49.595	46.982	48.899	0	0		NaN	0	0		NaN	0.977064	16.2941	0.006467	49.595					0	0		NaN					0	0		NaN	0.841554	7.25199	0.0130411	44.807	0.994451	22.5339	0.0074228	48.899	0
P13574	15	P13574	P13574	Protein STE12	STE12		0.999848	38.1877	0.00129559	62.378	48.348	62.378	0.994613	22.6633	0.0200215	40.801	0	0		NaN	0.999848	38.1877	0.00129559	62.378	0	0		NaN
P13902	22	P13902	P13902	Protein INO4	INO4		0.999969	45.1085	0.0014471	66.595	38.197	61.78	0	0		NaN	0	0		NaN
P14064	150	P14064	P14064	Transcriptional activator HAP4	HAP4		0.876763	8.5214	0.00283437	57.745	29.165	57.745
P14120	5	P14120	P14120	60S ribosomal protein L30	RPL30		1	118.7	2.6651e-52	199.68	148.8	166.7	0	0		NaN																	0.99991	40.4362	6.79958e-06	86.898					0.999997	54.9686	0.000188986	69.786	0.999999	59.7299	2.44333e-05	79.86
P14120	19	P14120	P14120	60S ribosomal protein L30	RPL30		0.851917	7.59892	0.00297769	92.439	48.631	69.598					0.75439	4.87351	0.0287905	57.59					0.764619	5.11674	0.00297769	92.439													0.851917	7.59892	0.0155572	69.598
P14120	22	P14120	P14120	60S ribosomal protein L30	RPL30		1	69.7917	0.000617337	76.572	61.239	70.1	1	66.5028	0.00127732	68.657	0.999956	43.5546	0.00935929	44.882	1	67.6316	0.00119354	69.276	1	68.204	0.00259018	69.276	0.999921	41.0141	0.0118715	41.704									0.999925	41.2644	0.0200572	42.336	0.999993	51.2675	0.0101446	51.268	0.999897
P14120	28	P14120	P14120	60S ribosomal protein L30	RPL30		0.998036	27.0608	0.00143898	67.993	56.924	61.815	0	0		NaN	0	0		NaN					0	0		NaN	0	0		NaN									0	0		NaN	0	0		NaN	0
P14120	66	P14120	P14120	60S ribosomal protein L30	RPL30		1	74.9442	1.0377e-05	131.83	107.44	74.944	1	131.826	1.0377e-05	131.83	1	114.894	1.1496e-05	114.89	1	113.687	2.03231e-05	113.69	0	0		NaN	1	82.4167	0.00213849	82.417	0.999981	47.2685	0.000357041	55.763	1	57.3472	0.00262378	57.347	0	0		NaN	1	69.9792	0.000616158	69.979	0
P14126	66	P14126	P14126	60S ribosomal protein L3	RPL3		0.837532	7.12233	9.09307e-05	63.337	47.198	63.337													0	0		NaN													0	0		NaN
P14126	357	P14126	P14126	60S ribosomal protein L3	RPL3		0.999996	53.6272	0.000339043	96.489	73.604	62.14													0.999961	44.132	0.0196588	44.616													0	0		NaN
P14126	367	P14126	P14126	60S ribosomal protein L3	RPL3		0.99969	35.0847	0.00752271	47.712	26.759	42.629	0	0		NaN					0.99969	35.0847	0.00752271	42.629	0	0		NaN									0	0		NaN									0
P14126	376	P14126	P14126	60S ribosomal protein L3	RPL3		0.99844	28.0618	0.00537197	43.454	32.349	43.454	0	0		NaN	0	0		NaN	0	0		NaN	0	0		NaN	0	0		NaN					0	0		NaN	0	0		NaN					0
P14126	384	P14126	P14126	60S ribosomal protein L3	RPL3		0.956346	13.4059	0.000275372	101.54	89.015	91.783					0	0		NaN	0	0		NaN	0	0		NaN	0	0		NaN	0	0		NaN	0	0		NaN	0	0		NaN	0	0		NaN	0
P14126	385	P14126	P14126	60S ribosomal protein L3	RPL3		0.628912	2.29113	0.000242325	103.83	103.83	103.83	0.603386	1.82227	0.000445394	81.296	0.588877	1.56053	0.00442463	60.91	0.62274	2.17667	0.000882328	76.478	0	0		NaN	0.573797	1.29142	0.0213022	40.067	0.580779	1.41568	0.00404563	52.482	0	0		NaN	0	0		NaN	0.611641	1.97264	0.000442927	91.318	0
P14164	29	P14164	P14164	ARS-binding factor 1	ABF1		0.564693	1.13017	0.000608747	67.726	55.86	67.726	0	0		NaN									0	0		NaN	0	0		NaN																	0
P14164	487	P14164	P14164	ARS-binding factor 1	ABF1		0.893165	9.2222	1.53838e-10	99.451	72.67	46.027	0.5	0	0.0122673	42.813	0	0		NaN	0.864951	8.06501	0.000256314	58.49	0	0		NaN													0	0		NaN					0
P14164	493	P14164	P14164	ARS-binding factor 1	ABF1		0.548553	0.846124	2.46441e-10	96.303	65.972	83.106	0.5	0	0.0122673	42.813	0	0		NaN	0.537289	0.648989	1.78261e-09	96.303	0	0		NaN													0	0		NaN	0.546831	0.815928	2.46441e-10	96.163	0
P14164	589	P14164	P14164	ARS-binding factor 1	ABF1		0.997209	25.5295	0.00753623	48.004	25.772	48.004	0	0		NaN					0	0		NaN	0	0		NaN	0	0		NaN													0	0		NaN
P14164	12	P14164	P14164	ARS-binding factor 1	ABF1		0.999972	45.5252	0.000912437	61.167	25.397	49.097									0	0		NaN	0	0		NaN	0	0		NaN	0	0		NaN	0	0		NaN					0	0		NaN	0.999836
P14164	3	P14164	P14164	ARS-binding factor 1	ABF1		1	107.859	1.65029e-08	115.57	81.187	115.57	1	89.5581	7.90276e-07	104.82					1	67.5099	4.35098e-06	83.081	0	0		NaN					0	0		NaN									1	70.79	3.36607e-05	74.944	1
P14164	186	P14164	P14164	ARS-binding factor 1	ABF1		1	57.5896	0	323.68	265.9	57.59	1	104.062	9.24382e-301	312.48	1	115.937	2.88033e-192	279.62	1	119.509	0	323.68	1	86.7081	1.10458e-205	286.29	1	94.2011	5.96226e-103	255.16	1	99.3986	2.00168e-51	179.17	1	106.404	5.36669e-130	243.4	1	69.953	1.44644e-39	154.36	1	102.609	8.27053e-271	301.93	1
P14164	518	P14164	P14164	ARS-binding factor 1	ABF1		0.999987	48.7106	0.000463818	68.034	58.112	68.034					0	0		NaN	0	0		NaN																	0	0		NaN					0
P14164	527	P14164	P14164	ARS-binding factor 1	ABF1		0.69782	3.63478	0.0013765	62.005	51.953	62.005	0	0		NaN	0	0		NaN	0	0		NaN	0.69782	3.63478	0.0013765	62.005	0	0		NaN	0	0		NaN	0	0		NaN	0	0		NaN	0	0		NaN	0
P14164	584	P14164	P14164	ARS-binding factor 1	ABF1		0.992704	21.3373	1.42738e-05	98.592	80.519	95.264													0	0		NaN
P14164	528	P14164	P14164	ARS-binding factor 1	ABF1		0.841528	7.25115	4.43292e-05	82.417	70.148	46.001	0	0		NaN	0	0		NaN									0	0		NaN	0	0		NaN	0	0		NaN	0	0		NaN	0	0		NaN	0
P14164	133	P14164	P14164	ARS-binding factor 1	ABF1		1	196.074	4.99673e-211	319.81	263.24	221.8	1	189.401	9.6688e-119	257.75	1	256.308	5.48875e-93	256.31	1	299.662	1.31163e-164	299.66	1	246.563	1.58802e-79	246.56	1	146.21	1.49472e-49	156.72	1	228.934	6.95048e-58	228.93	1	171.279	1.26761e-85	241.31	1	181.661	2.74493e-29	181.66	1	162.076	5.41994e-93	256.43	1
P14291	285	P14291	P14291	Protein RED1	RED1		0.98717	18.8615	0.000267605	93.162	63.388	93.162																					0	0		NaN
P14291	286	P14291	P14291	Protein RED1	RED1		0.595892	1.68669	0.000522451	78.934	69.694	74.92																					0	0		NaN
P14291	315	P14291	P14291	Protein RED1	RED1		0.999988	49.2894	0.00055805	65.472	45.253	65.472																																	0	0		NaN
P14291	821	P14291	P14291	Protein RED1	RED1		0.916498	10.4044	4.62871e-07	85.619	54.158	51.606																																	0	0		NaN
P14291	826	P14291	P14291	Protein RED1	RED1		1	71.9951	5.44514e-06	81.656	50.194	71.995																									0	0		NaN					0	0		NaN
P14291	502	P14291	P14291	Protein RED1	RED1		1	153.597	3.07326e-59	162.01	149.11	162.01																	1	72.464	6.96256e-10	83.881	1	145.06	5.10173e-44	157.55	0.999963	44.3372	0.000346737	50.498					1	102.579	8.85578e-30	120.08	1
P14291	523	P14291	P14291	Protein RED1	RED1		0.999783	36.6377	4.65632e-156	252.11	231.46	119.85																					0.998623	28.6041	1.03597e-48	151.95
P14291	672	P14291	P14291	Protein RED1	RED1		0.999961	44.0692	0.00183583	75.378	26.028	47.037																	0	0		NaN	0	0		NaN	0	0		NaN					0.520939	0	0.0168577	53.967	0
P14291	676	P14291	P14291	Protein RED1	RED1		0.998629	28.6242	0.00183583	75.378	26.028	47.037																	0	0		NaN	0	0		NaN	0	0		NaN					0.520939	0	0.0168577	53.967	0
P14291	682	P14291	P14291	Protein RED1	RED1		0.993276	21.6944	2.59018e-09	113.1	61.646	110.34																	0	0		NaN	0	0		NaN	0	0		NaN					0.958123	10.5841	0.0168577	53.967	0
P14291	532	P14291	P14291	Protein RED1	RED1		1	63.6242	4.70119e-67	240.1	210.54	63.624																	1	186.872	1.03557e-28	186.87	1	196.764	1.6613e-36	196.76	1	186.872	1.03557e-28	186.87					1	222.183	2.13132e-49	222.18	1
P14291	546	P14291	P14291	Protein RED1	RED1		1	75.736	9.0464e-178	248.54	231.25	90.601																	0.98513	18.2119	3.19918e-22	127.58	0.996812	24.9505	4.42264e-17	121.33	0.838801	7.16315	3.73156e-05	64.295	0.970653	15.1952	3.33365e-13	108.25	0.945863	12.4233	9.48673e-17	116.48	0.996678
P14291	702	P14291	P14291	Protein RED1	RED1		1	43.4077	0.00193261	52.026	34.326	43.408																	0	0		NaN
P14291	14	P14291	P14291	Protein RED1	RED1		1	45.8637	0.0035145	51.695	29.541	45.864																					0.531532	0.548491	0.0035145	51.695
P14291	25	P14291	P14291	Protein RED1	RED1		1	57.8361	3.78337e-06	71.052	63.858	57.836																					0	0		NaN
P14291	771	P14291	P14291	Protein RED1	RED1		0.999928	41.4457	0.00624777	54.776	23.976	54.712
P14291	767	P14291	P14291	Protein RED1	RED1		0.954821	13.2498	1.01286e-07	116.52	64.526	41.164																					0	0		NaN					0	0		NaN					0
P14291	768	P14291	P14291	Protein RED1	RED1		0.915688	10.3586	3.82241e-09	116.52	64.526	104.82																					0	0		NaN					0	0		NaN					0
P14291	585	P14291	P14291	Protein RED1	RED1		0.969127	14.968	3.44171e-26	140.89	124.76	104.88																	0.627564	2.26606	0.000163107	77.221	0.676285	3.19967	4.12917e-05	73.983	0.911363	10.1208	0.000217303	73.498	0.876593	8.51458	0.000377572	66.673	0.557967	1.01154	4.81665e-07	90.385	0
P14291	590	P14291	P14291	Protein RED1	RED1		1	101.218	5.20478e-17	130.27	117.23	118.47																	0.99991	40.4491	2.02526e-05	79.514	0.999929	41.4886	5.07591e-10	102.89	0	0		NaN	0	0		NaN	1	81.5261	6.48515e-07	92.38	0.999996
P14291	683	P14291	P14291	Protein RED1	RED1		1	192.443	5.30175e-120	235.73	161.74	235.73																	0	0		NaN	1	78.6147	6.07746e-05	79.741	0	0		NaN	0	0		NaN	1	83.6916	2.65893e-05	83.692	0.999999
P14291	696	P14291	P14291	Protein RED1	RED1		0.999988	49.2908	4.47319e-36	153.14	141.01	153.14																	0	0		NaN	0.996171	24.1524	4.72017e-07	95.094	0	0		NaN	0	0		NaN	0	0		NaN	0.850008
P14291	553	P14291	P14291	Protein RED1	RED1		1	109.345	1.18913e-13	109.42	89.33	109.42																	1	69.8997	5.83132e-05	71.697	1	86.4551	4.92511e-05	86.455	0	0		NaN					1	101.44	1.05202e-10	103.13	1
P14291	569	P14291	P14291	Protein RED1	RED1		0.922925	10.7825	0.000180357	68.123	57.262	55.322																	0	0		NaN	0	0		NaN	0	0		NaN					0	0		NaN	0
P14291	570	P14291	P14291	Protein RED1	RED1		0.773126	5.32466	2.73097e-06	94.01	94.01	41.367																	0	0		NaN	0	0		NaN	0	0		NaN					0	0		NaN	0
P14291	198	P14291	P14291	Protein RED1	RED1		0.999992	50.9113	0.00455532	55.815	34.282	55.815
P14291	610	P14291	P14291	Protein RED1	RED1		0.998952	29.791	0.00147101	69.261	48.421	42.976																	0	0		NaN	0	0		NaN	0	0		NaN	0	0		NaN	0.959517	13.7478	0.0313558	42.031	0
P14291	612	P14291	P14291	Protein RED1	RED1		0.999908	40.3543	3.3717e-13	121.99	81.92	121.99																	0	0		NaN	0	0		NaN	0	0		NaN	0	0		NaN	0	0		NaN	0
P14291	348	P14291	P14291	Protein RED1	RED1		1	54.5244	0.000105849	76.588	65.772	54.524
P14291	495	P14291	P14291	Protein RED1	RED1		0.999915	40.722	5.34236e-25	153.95	110.4	153.95																	0.979555	16.8045	5.0434e-05	75.479	0.832664	6.9688	6.23742e-05	73.466	0.927736	11.085	3.66246e-06	85.845					0.979555	16.8045	5.0434e-05	75.479	0
P14540	323	P14540	P14540	Fructose-bisphosphate aldolase	FBA1		0.967258	14.7044	9.05643e-47	160.25	151.31	58.159	0.333333	0	1.73401e-26	149.09	0.837744	10.1394	9.05643e-47	160.25	0.886665	8.93397	8.19349e-36	156.22	0.702053	6.73261	9.9416e-16	108.56	0.47215	2.526	6.07732e-21	120.24	0.967258	14.7044	2.41701e-19	130.56	0.825033	9.74545	1.27378e-11	101.96	0.352223	0.364219	0.000165611	65.225	0.809509	9.29376	8.63585e-21	123.14	0.827592
P14540	326	P14540	P14540	Fructose-bisphosphate aldolase	FBA1		0.735467	7.20899	9.05643e-47	160.25	151.31	79.393	0.483395	0	1.01443e-46	159.19	0.443867	0	9.05643e-47	160.25	0.472625	0	8.19349e-36	156.22	0.333333	0	9.9416e-16	108.56	0.478507	0	6.07732e-21	120.24	0.47791	0	2.41701e-19	130.56	0.465123	0	2.45893e-07	99.569	0.481122	0	1.57476e-08	88.551	0.480149	0	8.63585e-21	123.14	0.333333
P14540	327	P14540	P14540	Fructose-bisphosphate aldolase	FBA1		0.999985	48.2265	9.05643e-47	160.25	151.31	54.524	0.999902	40.1057	1.01443e-46	159.19	0.443867	0	9.05643e-47	160.25	0.472625	0	8.19349e-36	156.22	0.999762	36.2361	9.9416e-16	108.56	0.478507	0	6.07732e-21	120.24	0.47791	0	2.41701e-19	130.56	0.465123	0	2.45893e-07	99.569	0.999833	37.7665	1.57476e-08	88.551	0.99958	33.7681	8.63585e-21	123.14	0.333333
P14540	258	P14540	P14540	Fructose-bisphosphate aldolase	FBA1		1	50.6533	0.0028877	50.653	36.426	50.653	1	49.0487	0.00449623	49.049	1	41.4124	0.012151	41.412	1	50.6533	0.0028877	50.653	0	0		NaN	0	0		NaN	0	0		NaN					0	0		NaN	0	0		NaN	0
P14540	160	P14540	P14540	Fructose-bisphosphate aldolase	FBA1		0.973595	15.6669	4.24546e-67	168.55	160.12	168.55																													0.872489	8.35212	0.000197431	52.402
P14540	163	P14540	P14540	Fructose-bisphosphate aldolase	FBA1		1	58.9778	0.00166667	78.655	56.457	58.978	1	63.7269	0.00189952	63.727	0	0		NaN	1	65.3952	0.00166667	65.395	1	53.2519	0.00551467	53.252	0	0		NaN
P14540	30	P14540	P14540	Fructose-bisphosphate aldolase	FBA1		1	91.3001	1.188e-11	114.34	104.41	94.834	0	0		NaN	0	0		NaN	0	0		NaN	0.638142	2.4638	4.21013e-11	114.34	0.528377	0.493491	0.00124131	57.989	0.526148	0.45465	8.17947e-06	74.662									1	74.1467	2.93978e-09	102.37	0
P14540	340	P14540	P14540	Fructose-bisphosphate aldolase	FBA1		0.999813	37.2736	3.923e-07	103.61	94.9	103.61	0	0		NaN	0	0		NaN					0	0		NaN	0	0		NaN	0	0		NaN					0	0		NaN	0	0		NaN	0
P14540	345	P14540	P14540	Fructose-bisphosphate aldolase	FBA1		0.999814	37.2963	0.005723	90.657	73.417	80.165	0	0		NaN									0	0		NaN													0.978152	16.51	0.0196011	81.548					0
P14540	114	P14540	P14540	Fructose-bisphosphate aldolase	FBA1		0.5	0	1.6036e-20	105.84	93.871	105.84																													0	0		NaN
P14540	115	P14540	P14540	Fructose-bisphosphate aldolase	FBA1		1	92.0624	1.6036e-20	105.84	93.871	92.062	1	92.0624	0.00264619	92.062	0	0		NaN									0	0		NaN									0	0		NaN
P14540	85	P14540	P14540	Fructose-bisphosphate aldolase	FBA1		0.99993	41.5186	0.00231788	49.118	28.021	49.118
P14540	8	P14540	P14540	Fructose-bisphosphate aldolase	FBA1		0.998476	28.1626	0.000220236	106.6	84.513	90.709	0.704067	3.76421	0.000491039	100.02	0.795811	5.90776	0.00174884	76.827	0.77578	5.39064	0.000494855	101.64	0	0		NaN	0.892116	9.17463	0.000220236	92.439	0.881561	8.71758	0.000775701	80.219	0	0		NaN	0.892116	9.17463	0.000464863	92.439	0.77674	5.41465	0.031623	44.719	0.767039
P14540	10	P14540	P14540	Fructose-bisphosphate aldolase	FBA1		1	176.672	1.93473e-41	180.86	157.06	180.86	1	66.6255	2.10558e-05	75.334	0.662356	2.92633	0.000970941	70.919	1	71.4235	2.40284e-06	74.662	0.999999	59.7274	9.13395e-05	62.966	0.99999	50.134	0.000437565	88.948	0	0		NaN	0.706431	3.8136	0.000482207	96.253	1	98.399	1.69023e-11	101.64	1	78.7716	5.34564e-07	96.253	0.658246
P14540	348	P14540	P14540	Fructose-bisphosphate aldolase	FBA1		1	80.9051	5.19707e-34	165.58	140.11	80.905	1	165.584	5.19707e-34	165.58					1	79.8749	5.33131e-05	79.875	1	72.0057	2.03932e-05	86.467																	1	57.8039	0.000681966	110.34
P14540	308	P14540	P14540	Fructose-bisphosphate aldolase	FBA1		0.999999	62.3734	9.01656e-05	66.325	62.721	66.325	0.999999	62.3734	9.01656e-05	66.325	0	0		NaN	0	0		NaN					0	0		NaN
P14540	27	P14540	P14540	Fructose-bisphosphate aldolase	FBA1		1	44.3823	2.94159e-37	161.65	148.81	44.382	1	60.5281	2.28994e-10	109.89	1	40.8441	8.28855e-08	93.684	0.85812	7.81626	4.10538e-08	98.132	0	0		NaN	1	52.7843	0.00328204	52.784	0.848734	7.49031	9.02154e-06	74.364	0	0		NaN	0.924676	10.8906	0.000100849	67.43	1	47.6798	0.00870028	47.68	0
P14540	73	P14540	P14540	Fructose-bisphosphate aldolase	FBA1		1	63.4107	6.41131e-206	248.9	230.9	248.9																	0.955155	13.2836	4.42126e-09	73.805									0.975276	15.9602	0.0013905	44.365	0.993438	21.8013	3.81771e-29	118.14
P14832	158	P14832	P14832	Peptidyl-prolyl cis-trans isomerase	CPR1		1	47.559	0.0019007	55.656	43.863	47.559	0	0		NaN	0	0		NaN	0	0		NaN	0	0		NaN	0	0		NaN					0	0		NaN	0.581093	1.42129	0.0019007	55.656	0.560113	1.04946	0.00406294	47.752	0
P14832	87	P14832	P14832	Peptidyl-prolyl cis-trans isomerase	CPR1		0.998425	28.0217	6.17963e-12	176.65	144.72	120.49	0.997181	25.4873	0.000150336	126.28	0.995334	23.2903	6.80348e-05	137.18	0.99405	22.2289	6.17963e-12	176.65	0.996394	24.4144	0.000436232	146.54	0.991922	20.8919	0.00446628	122.18	0.994774	22.7953	1.65808e-07	139.68	0.989036	19.5526	0.00297621	111.82	0.939455	11.908	0.000952115	124.08	0.996781	24.9082	0.00167767	110.12	0.996269
P14832	88	P14832	P14832	Peptidyl-prolyl cis-trans isomerase	CPR1		0.616327	2.05849	0.000407672	91.069	81.747	89.698	0.520697	0.359751	0.00315501	91.069					0	0		NaN					0	0		NaN	0	0		NaN	0	0		NaN	0	0		NaN	0	0		NaN
P14832	74	P14832	P14832	Peptidyl-prolyl cis-trans isomerase	CPR1		0.99036	20.1173	4.81678e-07	71.359	60.937	71.359
P14832	138	P14832	P14832	Peptidyl-prolyl cis-trans isomerase	CPR1		0.908349	9.96117	1.00837e-16	128.96	118.33	92.063	0	0		NaN	0	0		NaN	0.89125	9.13571	2.91734e-09	98.943					0.869547	8.2384	0.0304055	45.33									0.908349	9.96117	5.28126e-07	92.063
P14832	139	P14832	P14832	Peptidyl-prolyl cis-trans isomerase	CPR1		1	128.847	4.20909e-15	128.85	110.07	128.85	1	74.162	0.000463428	74.162	1	77.6404	0.000312788	77.64	1	94.6162	1.188e-06	94.616	1	89.5068	3.03966e-06	89.507	1	94.6162	1.188e-06	94.616	1	90.6531	2.2484e-05	90.653	1	115.175	1.52059e-08	115.18	0.540988	0.713629	0.00105307	56.599	1	101.954	6.09402e-07	101.95	1
P14832	151	P14832	P14832	Peptidyl-prolyl cis-trans isomerase	CPR1		0.999996	53.9216	5.64688e-59	170.53	150.64	170.53	0.985609	18.5465	0.0211564	40.349	0.982805	17.6038	0.0090692	47.047	0.961047	13.9304	0.00207306	53.779	0.99607	24.0396	9.03933e-05	67.995	0	0		NaN	0	0		NaN	0	0		NaN	0.999546	33.435	1.39968e-06	77.39	0	0		NaN	0
P14832	29	P14832	P14832	Peptidyl-prolyl cis-trans isomerase	CPR1		1	57.9598	0.000317009	83.862	60.542	57.96	1	69.9535	0.0191486	69.954	0	0		NaN	1	83.8618	0.00276871	83.862	0	0		NaN	1	57.5896	0.0530717	57.59	0	0		NaN					0	0		NaN	1	74.162	0.0122714	74.162	1
P14922	927	P14922	P14922	General transcriptional corepressor CYC8	CYC8		0.999998	57.6572	0.000242855	110.53	85.148	103.26					0	0		NaN	0	0		NaN	0	0		NaN	0	0		NaN					0.994773	22.7946	0.026283	41.54	0	0		NaN	0.99992	40.9708	0.00255877	71.03
P14922	735	P14922	P14922	General transcriptional corepressor CYC8	CYC8		0.915606	10.354	6.5951e-15	95.123	87.762	54.537									0.5	0	0.00277188	48.115	0	0		NaN													0	0		NaN	0	0		NaN
P14922	736	P14922	P14922	General transcriptional corepressor CYC8	CYC8		0.5	0	6.5951e-15	95.123	87.762	69.435									0.5	0	0.00277188	48.115	0	0		NaN													0	0		NaN	0	0		NaN
P15019	56	P15019	P15019	Transaldolase	TAL1		0.977345	16.3489	4.02679e-05	65.425	55.077	48.389
P15019	281	P15019	P15019	Transaldolase	TAL1		0.5	0	0.000247086	61.477	55.935	61.477
P15019	282	P15019	P15019	Transaldolase	TAL1		0.860269	7.89342	1.80805e-05	76.713	66.964	76.713
P15108	235	P15108	P15108	ATP-dependent molecular chaperone HSC82	HSC82		0.56371	1.84714	2.36817e-10	100.02	76.169	100.02	0	0		NaN	0	0		NaN					0	0		NaN					0	0		NaN	0	0		NaN	0	0		NaN	0	0		NaN	0
P15108	236	P15108	P15108	ATP-dependent molecular chaperone HSC82	HSC82		0.754082	5.64075	4.59067e-34	162.93	144.91	111.63	0.602315	1.80285	7.53699e-34	159	0	0		NaN	0	0		NaN	0	0		NaN	0.5	0	9.8564e-05	73.722	0	0		NaN	0	0		NaN	0	0		NaN	0	0		NaN	0
P15108	238	P15108	P15108	ATP-dependent molecular chaperone HSC82	HSC82		0.997655	27.0152	3.86458e-88	193.54	179.26	136.04	0.997655	27.0152	1.40583e-20	136.04	0.889111	9.04067	2.01209e-27	144.75	0.985852	19.4063	1.45163e-19	128.32	0.965508	16.8943	1.96918e-27	154.72	0.706763	7.33963	9.8564e-05	73.722	0.977694	16.4178	8.17062e-17	132.24	0.928093	13.124	1.82055e-16	126.56	0	0		NaN	0.877618	8.55588	1.82541e-22	146.77	0.983043
P15108	249	P15108	P15108	ATP-dependent molecular chaperone HSC82	HSC82		0.726143	4.60561	0.00191663	49.929	28.976	43.405	0	0		NaN	0	0		NaN	0	0		NaN	0	0		NaN	0	0		NaN	0	0		NaN	0	0		NaN	0	0		NaN	0	0		NaN	0
P15108	250	P15108	P15108	ATP-dependent molecular chaperone HSC82	HSC82		0.484834	0	0.00191663	49.929	28.976	42.095									0	0		NaN																					0	0		NaN	0
P15180	586	P15180	P15180	Lysine--tRNA ligase, cytoplasmic	KRS1		0.54784	0.840506	1.05079e-07	91.207	85.497	91.207					0.54784	0.840506	1.05079e-07	91.207					0	0		NaN													0	0		NaN
P15436	13	P15436	P15436	DNA polymerase delta catalytic subunit	POL3		0.999996	53.5227	2.06279e-05	70.453	61.809	70.453
P15454	146	P15454	P15454	Guanylate kinase	GUK1		1	86.6243	0.00122861	86.624	56.054	86.624
P15624	86	P15624	P15624	Phenylalanine--tRNA ligase beta subunit	FRS1		0.951324	17.8616	0.00398073	51.135	34.472	51.135																																	0	0		NaN	0
P15731	129	P15731	P15731	Ubiquitin-conjugating enzyme E2 4	UBC4		0.998723	28.9319	0.00510252	63.624	52.795	63.624					0	0		NaN
P15731;P15732	5;5	P15731;P15732	P15732	Ubiquitin-conjugating enzyme E2 4;Ubiquitin-conjugating enzyme E2-16 kDa	UBC4;UBC5		0.999999	60.2368	0.00209387	71.379	43.273	69.825	0	0		NaN					0.999387	32.1221	0.0336075	42.109	0	0		NaN													0	0		NaN					0
P15873	164	P15873	P15873	Proliferating cell nuclear antigen	POL30		1	57.2927	0	447.51	419.86	57.293	1	174.617	1.24721e-109	224.86	1	47.7518	1.18087e-206	316.86	1	91.3172	5.79157e-198	287.01	1	88.2641	1.64167e-206	315.88	1	65.4225	0	430.75	1	103.17	0	400.8	1	95.6659	0	351.96	1	76.3005	0	447.51	1	120.311	0	373.9	1
7117;167118;167119;167120;167121;167122;167123;167124;167125;167126;167127;167128;167129;167130;167131;167132;167133;167134;167135;167136;167137;167138;167139;167140;167141;167142;167143;167144;167145;167146;167147;167148;167149;167150;167151;167152;167153;167154;167155;167156;167157;167158;167159;167160;167161;167162;167165;167166;167167;167168;167169;167177;167178;167179;167180;167181;167182;16…	68854	169571	qeP_20160229_Nikhil-G3-5-Lys-Glu	34729	67827	166875	qeP_20160304_Nikhil-L1-5-Lys	31582	67963	167564	qeP_20161114_Nikhil-sumo3-5	33199
P15873	168	P15873	P15873	Proliferating cell nuclear antigen	POL30		1	57.2927	1.28257e-177	245.92	231.9	57.293					0	0		NaN	0	0		NaN	0.522667	0.394029	0.00325528	46.178	0.689429	3.46329	6.29537e-10	88.036	0.75055	4.78397	1.28257e-177	245.92	0.530512	0.530699	1.26477e-05	70.453	0.655173	2.78755	8.09209e-06	88.036	0.703794	3.75852	9.08604e-17	117.74	0.57807
P15873	183	P15873	P15873	Proliferating cell nuclear antigen	POL30		1	40.8804	0.00529465	40.88	19.875	40.88
P15873	127	P15873	P15873	Proliferating cell nuclear antigen	POL30		1	219.135	0	349.64	332.68	279.27	1	253.538	7.30096e-72	253.54	1	212.536	6.16318e-205	246.37	1	214.998	6.11358e-205	246.44	1	192.151	1.09063e-137	218.6	1	255.858	0	317.75	1	248.663	0	308.8	1	248.883	0	316.38	1	66.6031	3.95325e-49	215.79	1	244.151	0	309.31	1
P15891	269	P15891	P15891	Actin-binding protein	ABP1		0.978949	16.6749	0.000230005	73.156	59.477	73.156									0	0		NaN	0	0		NaN
P15891	273	P15891	P15891	Actin-binding protein	ABP1		0.584089	1.47479	0.00419046	56.648	38.51	56.648									0	0		NaN	0	0		NaN
P15891	168	P15891	P15891	Actin-binding protein	ABP1		0.995183	23.151	0.00533802	43.991	37.613	43.991
P16370	9	P16370	P16370	DNA-directed RNA polymerase II subunit RPB3	RPB3		1	62.8229	0.00657039	62.823	43.036	62.823
P16649	39	P16649	P16649	General transcriptional corepressor TUP1	TUP1		0.999793	36.841	4.07384e-12	132.44	111.5	117.37	0.999613	34.1256	3.03665e-05	80.534	0.999414	32.3209	1.05159e-11	121.79	0.999494	32.9579	4.07384e-12	132.44	0.998232	27.5172	0.00902113	45.434	0.99569	23.6365	0.002852	54.598	0.994913	22.9135	0.00347473	52.254	0.99795	26.8729	0.00279867	55.885									0.986658
P16649	44	P16649	P16649	General transcriptional corepressor TUP1	TUP1		0.999973	45.7167	4.17959e-05	68.771	45.802	68.771					0	0		NaN
P16649	236	P16649	P16649	General transcriptional corepressor TUP1	TUP1		0.999634	34.3644	0.000285795	61.692	53.505	58.164	0.975836	16.062	0.00496901	40.856					0.997137	25.4188	0.00455293	41.912					0	0		NaN	0	0		NaN	0	0		NaN					0	0		NaN
P16649	78	P16649	P16649	General transcriptional corepressor TUP1	TUP1		0.999909	40.4302	5.1673e-05	89.171	63.126	89.171	0	0		NaN					0.880495	8.67339	5.1673e-05	78.653	0	0		NaN	0	0		NaN	0	0		NaN	0	0		NaN					0	0		NaN
P16649	81	P16649	P16649	General transcriptional corepressor TUP1	TUP1		0.676929	3.21245	2.12564e-05	81.865	67.607	81.865	0	0		NaN	0.676929	3.21245	2.12564e-05	81.865					0	0		NaN	0	0		NaN	0	0		NaN	0	0		NaN					0	0		NaN
P16649	229	P16649	P16649	General transcriptional corepressor TUP1	TUP1		1	70.0564	9.32599e-05	107.21	95.158	70.056	1	72.3251	0.0134145	72.325	1	74.3762	0.0059841	74.376	1	88.3919	0.00144734	88.392	0	0		NaN	1	66.2702	0.0260032	66.27	0	0		NaN	1	90.9056	0.00109945	90.906	0	0		NaN	1	63.0755	0.032645	63.076	0
P16649	268	P16649	P16649	General transcriptional corepressor TUP1	TUP1		0.917217	10.4453	8.67678e-10	93.572	84.971	82.037	0.908196	9.95318	1.02712e-05	70.352	0.917217	10.4453	2.3168e-07	82.037	0.871735	8.32278	1.24276e-06	76.186	0	0		NaN	0	0		NaN					0.904519	9.76502	4.14619e-05	62.274	0	0		NaN	0.909005	9.99551	8.69283e-06	70.76	0
P16649	615	P16649	P16649	General transcriptional corepressor TUP1	TUP1		1	90.6291	2.65008e-05	112.84	97.581	90.629					1	94.6917	0.00045042	94.692	1	112.842	2.65008e-05	112.84					0	0		NaN													1	85.7306	0.00381524	85.731
P16965	83	P16965	P16965	ATPase-stabilizing factor 15 kDa protein	STF2		1	75.1092	0.00297832	125.31	50.899	75.109	1	113.256	0.00297832	113.26	0	0		NaN	1	73.2482	0.0352304	125.31					0	0		NaN	0	0		NaN	0	0		NaN					1	87.3226	0.0295766	87.323	0
P16965	64	P16965	P16965	ATPase-stabilizing factor 15 kDa protein	STF2		0.999998	56.4857	0.000671377	57.804	51.076	57.804													0.999998	56.4857	0.000671377	57.804													0	0		NaN
P16965	33	P16965	P16965	ATPase-stabilizing factor 15 kDa protein	STF2		0.915689	10.3586	4.97537e-21	157.8	143.97	118.33	0.91259	10.1871	4.78404e-15	115.5	0.862333	7.96846	0.015114	43.297	0.904743	9.7763	4.97537e-21	157.8	0.915689	10.3586	6.24472e-16	118.33					0.895154	9.31345	0.000214887	71.692	0.833835	7.00541	0.0185414	40.801	0.843625	7.31982	0.000946777	61.097	0	0		NaN
P17076;P29453	213;213	P17076	P17076	60S ribosomal protein L8-A;60S ribosomal protein L8-B	RPL8A;RPL8B		1	72.2574	3.15041e-06	82.007	71.529	82.007																													0	0		NaN
P17076;P29453	225;225	P17076	P17076	60S ribosomal protein L8-A;60S ribosomal protein L8-B	RPL8A;RPL8B		0.999921	41.0153	4.68794e-18	131.56	114.67	125.52	0.998599	28.5302	1.27404e-13	125.52	0.999921	41.0153	4.68794e-18	131.56	0.99211	20.9948	1.05355e-09	95.767	0.998015	30.0233	5.8831e-07	85.619	0.971138	15.2696	0.000238123	68.257	0.998871	29.468	1.7914e-12	117.4	0.703227	3.74671	0.00364271	46.319	0	0		NaN	0.972274	15.4491	0.000178786	74.12	0.989674
P17076;P29453	193;193	P17076	P17076	60S ribosomal protein L8-A;60S ribosomal protein L8-B	RPL8A;RPL8B		0.999996	54.5245	4.33936e-12	88.541	67.193	88.541
P17076;P29453	63;63	P17076	P17076	60S ribosomal protein L8-A;60S ribosomal protein L8-B	RPL8A;RPL8B		0.999998	58.0381	0.004619	60.436	28.501	60.436									0	0		NaN	0	0		NaN													0	0		NaN
P17076	181	P17076	P17076	60S ribosomal protein L8-A	RPL8A		0.97356	15.661	0.00335134	71.349	62.62	50.353
P17076;P29453	6;6	P17076	P17076	60S ribosomal protein L8-A;60S ribosomal protein L8-B	RPL8A;RPL8B		1	93.3738	0.000210766	93.374	81.725	93.374	0	0		NaN	0	0		NaN					1	72.4847	0.00195358	72.485	0	0		NaN	0	0		NaN					0.999999	61.9993	0.0393214	61.999	0	0		NaN	0
P17076;P29453	15;15	P17076	P17076	60S ribosomal protein L8-A;60S ribosomal protein L8-B	RPL8A;RPL8B		0.980944	17.1161	1.95091e-05	80.69	68.163	71.888	0	0		NaN	0	0		NaN	0	0		NaN	0.979044	16.695	0.00959816	51.463	0	0		NaN	0	0		NaN	0	0		NaN	0	0		NaN	0.891765	9.15881	0.00708824	43.337	0
P17076;P29453	18;18	P17076	P17076	60S ribosomal protein L8-A;60S ribosomal protein L8-B	RPL8A;RPL8B		0.664535	2.96871	0.00167574	57.164	33.36	55.04	0.503077	0.0534605	0.0143043	47.039	0	0		NaN	0	0		NaN					0	0		NaN	0	0		NaN	0	0		NaN					0	0		NaN	0
P17076;P29453	230;230	P17076	P17076	60S ribosomal protein L8-A;60S ribosomal protein L8-B	RPL8A;RPL8B		0.624309	2.20569	0.00220608	58.671	40.075	43.408	0	0		NaN									0	0		NaN									0	0		NaN	0	0		NaN					0
P17076;P29453	43;43	P17076	P17076	60S ribosomal protein L8-A;60S ribosomal protein L8-B	RPL8A;RPL8B		0.996778	24.9047	8.05111e-36	152.71	124.1	141.86	0.873078	8.37518	7.05258e-27	152.71	0.990887	20.3634	8.05111e-36	149	0.996778	24.9047	2.49158e-25	141.86	0.965363	14.4515	5.52049e-05	68.82	0.852925	7.63372	8.52452e-25	129.05	0.991678	20.7615	4.29635e-27	144.33	0.860406	7.89838	1.96465e-21	123.36	0.751045	4.79546	5.56474e-08	103.61	0.900917	9.58684	6.87406e-21	115.87	0.915566
P17076;P29453	51;51	P17076	P17076	60S ribosomal protein L8-A;60S ribosomal protein L8-B	RPL8A;RPL8B		0.985387	18.2887	7.41887e-27	141.97	108.99	112.3	0.5	0	0.0019215	55.33	0.884568	8.84407	1.87956e-13	118.21	0.985387	18.2887	2.74344e-16	112.3	0.739353	4.52799	7.41887e-27	141.97	0.621148	2.14725	4.05428e-06	87.088	0.856183	7.74758	0.00081256	57.52	0.59401	1.65278	1.40791e-06	92.307	0.900322	9.558	5.04826e-09	103.61	0.546297	0.806569	4.79042e-06	85.636	0.859351
P17076;P29453	105;105	P17076	P17076	60S ribosomal protein L8-A;60S ribosomal protein L8-B	RPL8A;RPL8B		0.5	0	0.00265649	57.348	43.579	57.348
P17076;P29453	106;106	P17076	P17076	60S ribosomal protein L8-A;60S ribosomal protein L8-B	RPL8A;RPL8B		0.5	0	0.00265649	57.348	43.579	57.348
P17106	65	P17106	P17106	Centromere-binding protein 1	CBF1		1	87.3076	2.38188e-11	160.36	132.35	87.308	0	0		NaN	0	0		NaN	1	112.129	3.17111e-05	112.13					1	107.154	6.80945e-05	107.15					1	99.815	0.000266987	99.815					0	0		NaN	0
P17106	196	P17106	P17106	Centromere-binding protein 1	CBF1		0.8496	7.51968	5.86354e-52	170.91	157.72	48.656	0.5	0	5.86354e-52	170.91	0.5	0	8.26767e-15	101.74	0.5	0	3.56563e-43	141.1	0	0		NaN	0.5	0	2.4772e-34	130.09	0.5	0	0.000734566	46.783	0.5	0	2.88252e-21	114.02	0.5	0	0.00583398	40.544	0.8496	7.51968	1.9345e-27	125.04	0.516704
P17106	197	P17106	P17106	Centromere-binding protein 1	CBF1		0.531032	0.539783	5.86354e-52	170.91	157.72	60.641	0.5	0	5.86354e-52	170.91	0.5	0	8.26767e-15	101.74	0.5	0	3.56563e-43	141.1	0	0		NaN	0.5	0	2.4772e-34	130.09	0.5	0	0.000734566	46.783	0.5	0	2.88252e-21	114.02	0.5	0	0.00583398	40.544	0.5	0	1.9345e-27	125.04	0.5
P17106	9	P17106	P17106	Centromere-binding protein 1	CBF1		1	76.7016	1.14715e-06	85.855	56.719	85.855
P17106	36	P17106	P17106	Centromere-binding protein 1	CBF1		0.904245	9.75123	7.75388e-05	82.908	62.527	82.908									0	0		NaN	0	0		NaN									0	0		NaN	0	0		NaN					0
P17106	37	P17106	P17106	Centromere-binding protein 1	CBF1		0.5	0	0.00368783	47.201	42.4	47.201									0	0		NaN	0	0		NaN									0	0		NaN	0	0		NaN					0
P17106	285	P17106	P17106	Centromere-binding protein 1	CBF1		0.999982	47.4738	0.00039577	68.189	39.25	54.834
P17536	7	P17536	P17536	Tropomyosin-1	TPM1		0.999966	44.743	0.00373321	56.916	33.162	54.539	0	0		NaN	0	0		NaN	0	0		NaN	0	0		NaN	0	0		NaN	0	0		NaN	0	0		NaN	0	0		NaN	0	0		NaN	0
P17891	29	P17891	P17891	Clathrin light chain	CLC1		1	77.6774	1.49514e-07	104.17	94.512	77.677									0	0		NaN	0	0		NaN	0	0		NaN					0	0		NaN	1	69.9535	0.0111526	69.954	0	0		NaN
P17891	40	P17891	P17891	Clathrin light chain	CLC1		1	95.0945	3.01239e-11	95.094	69.27	95.094	1	59.4341	0.000417164	59.434																									0	0		NaN	1	67.7275	6.00039e-05	67.727
P18239	8	P18239	P18239	ADP,ATP carrier protein 2	PET9		0.999791	37.4392	0.00399815	60.768	56.8	60.768									0	0		NaN	0	0		NaN
P18412	96	P18412	P18412	Ty transcription activator TEC1	TEC1		0.991933	20.8978	0.000237608	108.98	96.764	76.465	0.990165	20.0295	0.000237608	108.98	0.885926	8.90212	0.00039847	83.948	0.988916	19.5045	0.00024293	105.52	0.991933	20.8978	0.000620936	84.213					0	0		NaN					0	0		NaN	0	0		NaN	0
P18412	54	P18412	P18412	Ty transcription activator TEC1	TEC1		1	85.9581	5.44866e-96	271.04	247.97	85.958	1	85.9581	2.57209e-66	251.56	1	57.5984	5.44866e-96	271.04	1	142.085	7.52462e-80	255.39	1	205.094	7.58188e-28	205.09	1	234.284	1.29068e-53	234.28	1	185.814	1.73765e-19	185.81	1	205.586	7.05286e-28	205.59	1	150.81	3.41872e-08	150.81	1	218.604	5.85337e-35	218.6	1
[truncated: 1,652 more rows]
[truncated: 311 more columns]

## Sheet: Phospho (STY) sites
Proteins	Positions within proteins	Leading proteins	Protein	Protein names	Gene names	Fasta headers	Localization prob	Score diff	PEP	Score	Delta score	Score for localization	Localization prob 0_1	Score diff 0_1	PEP 0_1	Score 0_1	Localization prob 0_2	Score diff 0_2	PEP 0_2	Score 0_2	Localization prob 0_3	Score diff 0_3	PEP 0_3	Score 0_3	Localization prob 0_4	Score diff 0_4	PEP 0_4	Score 0_4	Localization prob 1_1	Score diff 1_1	PEP 1_1	Score 1_1	Localization prob 1_2	Score diff 1_2	PEP 1_2	Score 1_2	Localization prob 1_3	Score diff 1_3	PEP 1_3	Score 1_3	Localization prob 1_4	Score diff 1_4	PEP 1_4	Score 1_4	Localization prob 2_1	Score diff 2_1	PEP 2_1	Score 2_1	Localization prob 2_2
[truncated: 290 more rows]
[truncated: 311 more columns]

[truncated: 2 more sheets: ModificationSpecific Peptides, Oxidation (M) sites]
