# Supplementary material for: SUMO is a pervasive regulator of meiosis
Source: eLife. 2021 Jan 27;10:e57720. doi: 10.7554/eLife.57720 (PMC7924959; doi:10.7554/eLife.57720)
Supplement: Supplementary file 4. [file elife-57720-supp4.xlsx]

## Sheet: Table header legend
Table header	MaxQuant description
Protein IDs	Identifier(s) of protein(s) contained in the protein group. They are sorted by number of identified peptides in descending order.
Majority protein IDs	These are the IDs of those proteins that have at least half of the peptides that the leading protein has.
Peptide counts (all)	Number of peptides associated with each protein in protein group, occurring in the order as the protein IDs occur in the 'Protein IDs' column. Here distinct peptide sequences are counted. Modified forms or different charges are counted as one peptide.
Peptide counts (razor+unique)	Number of peptides associated with each protein in protein group, occurring in the order as the protein IDs occur in the 'Protein IDs' column. Here distinct peptide sequences are counted. Modified forms or different charges are counted as one peptide.
Peptide counts (unique)	Number of peptides associated with each protein in protein group, occurring in the order as the protein IDs occur in the 'Protein IDs' column. Here distinct peptide sequences are counted. Modified forms or different charges are counted as one peptide.
Protein names	Name(s) of protein(s) contained within the group.
Gene names	Name(s) of the gene(s) associated to the protein(s) contained within the group.
Fasta headers	Fasta headers(s) of protein(s) contained within the group.
Number of proteins	Number of proteins contained within the group. This corresponds to the number of entries in the column 'Protein IDs'.
Peptides	The total number of peptide sequences associated with the protein group (i.e. for all the proteins in the group).
Razor + unique peptides	The total number of razor + unique peptides associated with the protein group (i.e. these peptides are shared with another protein group).
Unique peptides	The total number of unique peptides associated with the protein group (i.e. these peptides are not shared with another protein group).
Peptides 0_1	Number of peptides (distinct peptide sequences) in experiment 0_1
Peptides 0_2	Number of peptides (distinct peptide sequences) in experiment 0_2
Peptides 0_3	Number of peptides (distinct peptide sequences) in experiment 0_3
Peptides 0_4	Number of peptides (distinct peptide sequences) in experiment 0_4
Peptides 1_1	Number of peptides (distinct peptide sequences) in experiment 1_1
Peptides 1_2	Number of peptides (distinct peptide sequences) in experiment 1_2
Peptides 1_3	Number of peptides (distinct peptide sequences) in experiment 1_3
Peptides 1_4	Number of peptides (distinct peptide sequences) in experiment 1_4
Peptides 2_1	Number of peptides (distinct peptide sequences) in experiment 2_1
Peptides 2_2	Number of peptides (distinct peptide sequences) in experiment 2_2
Peptides 2_3	Number of peptides (distinct peptide sequences) in experiment 2_3
Peptides 2_4	Number of peptides (distinct peptide sequences) in experiment 2_4
Peptides 2_5	Number of peptides (distinct peptide sequences) in experiment 2_5
Peptides 2_6	Number of peptides (distinct peptide sequences) in experiment 2_6
Peptides 2_7	Number of peptides (distinct peptide sequences) in experiment 2_7
Peptides 3_1	Number of peptides (distinct peptide sequences) in experiment 3_1
Peptides 3_2	Number of peptides (distinct peptide sequences) in experiment 3_2
Peptides 3_3	Number of peptides (distinct peptide sequences) in experiment 3_3
Peptides 3_4	Number of peptides (distinct peptide sequences) in experiment 3_4
Peptides 3_5	Number of peptides (distinct peptide sequences) in experiment 3_5
Peptides 5_1	Number of peptides (distinct peptide sequences) in experiment 5_1
Peptides 5_2	Number of peptides (distinct peptide sequences) in experiment 5_2
Peptides 5_3	Number of peptides (distinct peptide sequences) in experiment 5_3
Peptides 5_4	Number of peptides (distinct peptide sequences) in experiment 5_4
Peptides 5_5	Number of peptides (distinct peptide sequences) in experiment 5_5
Peptides 6_1	Number of peptides (distinct peptide sequences) in experiment 6_1
Peptides 6_2	Number of peptides (distinct peptide sequences) in experiment 6_2
Peptides 6_3	Number of peptides (distinct peptide sequences) in experiment 6_3
Peptides 6_4	Number of peptides (distinct peptide sequences) in experiment 6_4
Peptides 6_5	Number of peptides (distinct peptide sequences) in experiment 6_5
Peptides 6_6	Number of peptides (distinct peptide sequences) in experiment 6_6
Razor + unique peptides 0_1	Number of razor + unique peptides (distinct peptide sequences) in experiment 0_1
Razor + unique peptides 0_2	Number of razor + unique peptides (distinct peptide sequences) in experiment 0_2
Razor + unique peptides 0_3	Number of razor + unique peptides (distinct peptide sequences) in experiment 0_3
Razor + unique peptides 0_4	Number of razor + unique peptides (distinct peptide sequences) in experiment 0_4
Razor + unique peptides 1_1	Number of razor + unique peptides (distinct peptide sequences) in experiment 1_1
Razor + unique peptides 1_2	Number of razor + unique peptides (distinct peptide sequences) in experiment 1_2
Razor + unique peptides 1_3	Number of razor + unique peptides (distinct peptide sequences) in experiment 1_3
Razor + unique peptides 1_4	Number of razor + unique peptides (distinct peptide sequences) in experiment 1_4
Razor + unique peptides 2_1	Number of razor + unique peptides (distinct peptide sequences) in experiment 2_1
Razor + unique peptides 2_2	Number of razor + unique peptides (distinct peptide sequences) in experiment 2_2
Razor + unique peptides 2_3	Number of razor + unique peptides (distinct peptide sequences) in experiment 2_3
Razor + unique peptides 2_4	Number of razor + unique peptides (distinct peptide sequences) in experiment 2_4
Razor + unique peptides 2_5	Number of razor + unique peptides (distinct peptide sequences) in experiment 2_5
Razor + unique peptides 2_6	Number of razor + unique peptides (distinct peptide sequences) in experiment 2_6
Razor + unique peptides 2_7	Number of razor + unique peptides (distinct peptide sequences) in experiment 2_7
Razor + unique peptides 3_1	Number of razor + unique peptides (distinct peptide sequences) in experiment 3_1
Razor + unique peptides 3_2	Number of razor + unique peptides (distinct peptide sequences) in experiment 3_2
Razor + unique peptides 3_3	Number of razor + unique peptides (distinct peptide sequences) in experiment 3_3
Razor + unique peptides 3_4	Number of razor + unique peptides (distinct peptide sequences) in experiment 3_4
Razor + unique peptides 3_5	Number of razor + unique peptides (distinct peptide sequences) in experiment 3_5
Razor + unique peptides 5_1	Number of razor + unique peptides (distinct peptide sequences) in experiment 5_1
Razor + unique peptides 5_2	Number of razor + unique peptides (distinct peptide sequences) in experiment 5_2
Razor + unique peptides 5_3	Number of razor + unique peptides (distinct peptide sequences) in experiment 5_3
Razor + unique peptides 5_4	Number of razor + unique peptides (distinct peptide sequences) in experiment 5_4
Razor + unique peptides 5_5	Number of razor + unique peptides (distinct peptide sequences) in experiment 5_5
Razor + unique peptides 6_1	Number of razor + unique peptides (distinct peptide sequences) in experiment 6_1
Razor + unique peptides 6_2	Number of razor + unique peptides (distinct peptide sequences) in experiment 6_2
Razor + unique peptides 6_3	Number of razor + unique peptides (distinct peptide sequences) in experiment 6_3
Razor + unique peptides 6_4	Number of razor + unique peptides (distinct peptide sequences) in experiment 6_4
Razor + unique peptides 6_5	Number of razor + unique peptides (distinct peptide sequences) in experiment 6_5
Razor + unique peptides 6_6	Number of razor + unique peptides (distinct peptide sequences) in experiment 6_6
Unique peptides 0_1	Number of unique peptides (distinct peptide sequences) in experiment 0_1
Unique peptides 0_2	Number of unique peptides (distinct peptide sequences) in experiment 0_2
Unique peptides 0_3	Number of unique peptides (distinct peptide sequences) in experiment 0_3
Unique peptides 0_4	Number of unique peptides (distinct peptide sequences) in experiment 0_4
Unique peptides 1_1	Number of unique peptides (distinct peptide sequences) in experiment 1_1
Unique peptides 1_2	Number of unique peptides (distinct peptide sequences) in experiment 1_2
Unique peptides 1_3	Number of unique peptides (distinct peptide sequences) in experiment 1_3
Unique peptides 1_4	Number of unique peptides (distinct peptide sequences) in experiment 1_4
Unique peptides 2_1	Number of unique peptides (distinct peptide sequences) in experiment 2_1
Unique peptides 2_2	Number of unique peptides (distinct peptide sequences) in experiment 2_2
Unique peptides 2_3	Number of unique peptides (distinct peptide sequences) in experiment 2_3
Unique peptides 2_4	Number of unique peptides (distinct peptide sequences) in experiment 2_4
Unique peptides 2_5	Number of unique peptides (distinct peptide sequences) in experiment 2_5
Unique peptides 2_6	Number of unique peptides (distinct peptide sequences) in experiment 2_6
Unique peptides 2_7	Number of unique peptides (distinct peptide sequences) in experiment 2_7
Unique peptides 3_1	Number of unique peptides (distinct peptide sequences) in experiment 3_1
Unique peptides 3_2	Number of unique peptides (distinct peptide sequences) in experiment 3_2
Unique peptides 3_3	Number of unique peptides (distinct peptide sequences) in experiment 3_3
Unique peptides 3_4	Number of unique peptides (distinct peptide sequences) in experiment 3_4
Unique peptides 3_5	Number of unique peptides (distinct peptide sequences) in experiment 3_5
Unique peptides 5_1	Number of unique peptides (distinct peptide sequences) in experiment 5_1
Unique peptides 5_2	Number of unique peptides (distinct peptide sequences) in experiment 5_2
Unique peptides 5_3	Number of unique peptides (distinct peptide sequences) in experiment 5_3
Unique peptides 5_4	Number of unique peptides (distinct peptide sequences) in experiment 5_4
Unique peptides 5_5	Number of unique peptides (distinct peptide sequences) in experiment 5_5
Unique peptides 6_1	Number of unique peptides (distinct peptide sequences) in experiment 6_1
Unique peptides 6_2	Number of unique peptides (distinct peptide sequences) in experiment 6_2
Unique peptides 6_3	Number of unique peptides (distinct peptide sequences) in experiment 6_3
Unique peptides 6_4	Number of unique peptides (distinct peptide sequences) in experiment 6_4
Unique peptides 6_5	Number of unique peptides (distinct peptide sequences) in experiment 6_5
Unique peptides 6_6	Number of unique peptides (distinct peptide sequences) in experiment 6_6
Sequence coverage [%]	Percentage of the sequence that is covered by the identified peptides of the best protein sequence contained in the group.
Unique + razor sequence coverage [%]	Percentage of the sequence that is covered by the identified unique and razor peptides of the best protein sequence contained in the group.
Unique sequence coverage [%]	Percentage of the sequence that is covered by the identified unique peptides of the best protein sequence contained in the group.
Mol. weight [kDa]	Molecular weight of the leading protein sequence contained in the protein group.
Sequence length	The length of the leading protein sequence contained in the group.
Sequence lengths	The length of all sequences of the proteins contained in the group.
Q-value	This is the ratio of reverse to forward protein groups.
Score	Protein score which is derived from peptide posterior error probabilities.
Identification type 0_1	Indicates whether this experiment was identified by MS/MS or only by matching between runs.
Identification type 0_2	Indicates whether this experiment was identified by MS/MS or only by matching between runs.
Identification type 0_3	Indicates whether this experiment was identified by MS/MS or only by matching between runs.
Identification type 0_4	Indicates whether this experiment was identified by MS/MS or only by matching between runs.
Identification type 1_1	Indicates whether this experiment was identified by MS/MS or only by matching between runs.
Identification type 1_2	Indicates whether this experiment was identified by MS/MS or only by matching between runs.
Identification type 1_3	Indicates whether this experiment was identified by MS/MS or only by matching between runs.
Identification type 1_4	Indicates whether this experiment was identified by MS/MS or only by matching between runs.
Identification type 2_1	Indicates whether this experiment was identified by MS/MS or only by matching between runs.
Identification type 2_2	Indicates whether this experiment was identified by MS/MS or only by matching between runs.
Identification type 2_3	Indicates whether this experiment was identified by MS/MS or only by matching between runs.
Identification type 2_4	Indicates whether this experiment was identified by MS/MS or only by matching between runs.
Identification type 2_5	Indicates whether this experiment was identified by MS/MS or only by matching between runs.
Identification type 2_6	Indicates whether this experiment was identified by MS/MS or only by matching between runs.
Identification type 2_7	Indicates whether this experiment was identified by MS/MS or only by matching between runs.
Identification type 3_1	Indicates whether this experiment was identified by MS/MS or only by matching between runs.
Identification type 3_2	Indicates whether this experiment was identified by MS/MS or only by matching between runs.
Identification type 3_3	Indicates whether this experiment was identified by MS/MS or only by matching between runs.
Identification type 3_4	Indicates whether this experiment was identified by MS/MS or only by matching between runs.
Identification type 3_5	Indicates whether this experiment was identified by MS/MS or only by matching between runs.
Identification type 5_1	Indicates whether this experiment was identified by MS/MS or only by matching between runs.
Identification type 5_2	Indicates whether this experiment was identified by MS/MS or only by matching between runs.
Identification type 5_3	Indicates whether this experiment was identified by MS/MS or only by matching between runs.
Identification type 5_4	Indicates whether this experiment was identified by MS/MS or only by matching between runs.
Identification type 5_5	Indicates whether this experiment was identified by MS/MS or only by matching between runs.
Identification type 6_1	Indicates whether this experiment was identified by MS/MS or only by matching between runs.
Identification type 6_2	Indicates whether this experiment was identified by MS/MS or only by matching between runs.
Identification type 6_3	Indicates whether this experiment was identified by MS/MS or only by matching between runs.
Identification type 6_4	Indicates whether this experiment was identified by MS/MS or only by matching between runs.
Identification type 6_5	Indicates whether this experiment was identified by MS/MS or only by matching between runs.
Identification type 6_6	Indicates whether this experiment was identified by MS/MS or only by matching between runs.
Sequence coverage 0_1 [%]	Percentage of the sequence that is covered by the identified peptides in this sample of the longest protein sequence contained within the group.
Sequence coverage 0_2 [%]	Percentage of the sequence that is covered by the identified peptides in this sample of the longest protein sequence contained within the group.
Sequence coverage 0_3 [%]	Percentage of the sequence that is covered by the identified peptides in this sample of the longest protein sequence contained within the group.
Sequence coverage 0_4 [%]	Percentage of the sequence that is covered by the identified peptides in this sample of the longest protein sequence contained within the group.
Sequence coverage 1_1 [%]	Percentage of the sequence that is covered by the identified peptides in this sample of the longest protein sequence contained within the group.
Sequence coverage 1_2 [%]	Percentage of the sequence that is covered by the identified peptides in this sample of the longest protein sequence contained within the group.
Sequence coverage 1_3 [%]	Percentage of the sequence that is covered by the identified peptides in this sample of the longest protein sequence contained within the group.
Sequence coverage 1_4 [%]	Percentage of the sequence that is covered by the identified peptides in this sample of the longest protein sequence contained within the group.
Sequence coverage 2_1 [%]	Percentage of the sequence that is covered by the identified peptides in this sample of the longest protein sequence contained within the group.
Sequence coverage 2_2 [%]	Percentage of the sequence that is covered by the identified peptides in this sample of the longest protein sequence contained within the group.
Sequence coverage 2_3 [%]	Percentage of the sequence that is covered by the identified peptides in this sample of the longest protein sequence contained within the group.
Sequence coverage 2_4 [%]	Percentage of the sequence that is covered by the identified peptides in this sample of the longest protein sequence contained within the group.
Sequence coverage 2_5 [%]	Percentage of the sequence that is covered by the identified peptides in this sample of the longest protein sequence contained within the group.
Sequence coverage 2_6 [%]	Percentage of the sequence that is covered by the identified peptides in this sample of the longest protein sequence contained within the group.
Sequence coverage 2_7 [%]	Percentage of the sequence that is covered by the identified peptides in this sample of the longest protein sequence contained within the group.
Sequence coverage 3_1 [%]	Percentage of the sequence that is covered by the identified peptides in this sample of the longest protein sequence contained within the group.
Sequence coverage 3_2 [%]	Percentage of the sequence that is covered by the identified peptides in this sample of the longest protein sequence contained within the group.
Sequence coverage 3_3 [%]	Percentage of the sequence that is covered by the identified peptides in this sample of the longest protein sequence contained within the group.
Sequence coverage 3_4 [%]	Percentage of the sequence that is covered by the identified peptides in this sample of the longest protein sequence contained within the group.
Sequence coverage 3_5 [%]	Percentage of the sequence that is covered by the identified peptides in this sample of the longest protein sequence contained within the group.
Sequence coverage 5_1 [%]	Percentage of the sequence that is covered by the identified peptides in this sample of the longest protein sequence contained within the group.
Sequence coverage 5_2 [%]	Percentage of the sequence that is covered by the identified peptides in this sample of the longest protein sequence contained within the group.
Sequence coverage 5_3 [%]	Percentage of the sequence that is covered by the identified peptides in this sample of the longest protein sequence contained within the group.
Sequence coverage 5_4 [%]	Percentage of the sequence that is covered by the identified peptides in this sample of the longest protein sequence contained within the group.
Sequence coverage 5_5 [%]	Percentage of the sequence that is covered by the identified peptides in this sample of the longest protein sequence contained within the group.
Sequence coverage 6_1 [%]	Percentage of the sequence that is covered by the identified peptides in this sample of the longest protein sequence contained within the group.
Sequence coverage 6_2 [%]	Percentage of the sequence that is covered by the identified peptides in this sample of the longest protein sequence contained within the group.
Sequence coverage 6_3 [%]	Percentage of the sequence that is covered by the identified peptides in this sample of the longest protein sequence contained within the group.
Sequence coverage 6_4 [%]	Percentage of the sequence that is covered by the identified peptides in this sample of the longest protein sequence contained within the group.
Sequence coverage 6_5 [%]	Percentage of the sequence that is covered by the identified peptides in this sample of the longest protein sequence contained within the group.
Sequence coverage 6_6 [%]	Percentage of the sequence that is covered by the identified peptides in this sample of the longest protein sequence contained within the group.
Intensity	Summed up eXtracted Ion Current (XIC) of all isotopic clusters associated with the identified AA sequence. In case of a labeled experiment this is the total intensity of all the isotopic patterns in the label cluster.
Intensity 0_1	Summed up eXtracted Ion Current (XIC) of all isotopic clusters associated with the identified AA sequence. In case of a labeled experiment this is the total intensity of all the isotopic patterns in the label cluster.
Intensity 0_2	Summed up eXtracted Ion Current (XIC) of all isotopic clusters associated with the identified AA sequence. In case of a labeled experiment this is the total intensity of all the isotopic patterns in the label cluster.
Intensity 0_3	Summed up eXtracted Ion Current (XIC) of all isotopic clusters associated with the identified AA sequence. In case of a labeled experiment this is the total intensity of all the isotopic patterns in the label cluster.
Intensity 0_4	Summed up eXtracted Ion Current (XIC) of all isotopic clusters associated with the identified AA sequence. In case of a labeled experiment this is the total intensity of all the isotopic patterns in the label cluster.
Intensity 1_1	Summed up eXtracted Ion Current (XIC) of all isotopic clusters associated with the identified AA sequence. In case of a labeled experiment this is the total intensity of all the isotopic patterns in the label cluster.
Intensity 1_2	Summed up eXtracted Ion Current (XIC) of all isotopic clusters associated with the identified AA sequence. In case of a labeled experiment this is the total intensity of all the isotopic patterns in the label cluster.
Intensity 1_3	Summed up eXtracted Ion Current (XIC) of all isotopic clusters associated with the identified AA sequence. In case of a labeled experiment this is the total intensity of all the isotopic patterns in the label cluster.
Intensity 1_4	Summed up eXtracted Ion Current (XIC) of all isotopic clusters associated with the identified AA sequence. In case of a labeled experiment this is the total intensity of all the isotopic patterns in the label cluster.
Intensity 2_1	Summed up eXtracted Ion Current (XIC) of all isotopic clusters associated with the identified AA sequence. In case of a labeled experiment this is the total intensity of all the isotopic patterns in the label cluster.
Intensity 2_2	Summed up eXtracted Ion Current (XIC) of all isotopic clusters associated with the identified AA sequence. In case of a labeled experiment this is the total intensity of all the isotopic patterns in the label cluster.
Intensity 2_3	Summed up eXtracted Ion Current (XIC) of all isotopic clusters associated with the identified AA sequence. In case of a labeled experiment this is the total intensity of all the isotopic patterns in the label cluster.
Intensity 2_4	Summed up eXtracted Ion Current (XIC) of all isotopic clusters associated with the identified AA sequence. In case of a labeled experiment this is the total intensity of all the isotopic patterns in the label cluster.
Intensity 2_5	Summed up eXtracted Ion Current (XIC) of all isotopic clusters associated with the identified AA sequence. In case of a labeled experiment this is the total intensity of all the isotopic patterns in the label cluster.
Intensity 2_6	Summed up eXtracted Ion Current (XIC) of all isotopic clusters associated with the identified AA sequence. In case of a labeled experiment this is the total intensity of all the isotopic patterns in the label cluster.
Intensity 2_7	Summed up eXtracted Ion Current (XIC) of all isotopic clusters associated with the identified AA sequence. In case of a labeled experiment this is the total intensity of all the isotopic patterns in the label cluster.
Intensity 3_1	Summed up eXtracted Ion Current (XIC) of all isotopic clusters associated with the identified AA sequence. In case of a labeled experiment this is the total intensity of all the isotopic patterns in the label cluster.
Intensity 3_2	Summed up eXtracted Ion Current (XIC) of all isotopic clusters associated with the identified AA sequence. In case of a labeled experiment this is the total intensity of all the isotopic patterns in the label cluster.
Intensity 3_3	Summed up eXtracted Ion Current (XIC) of all isotopic clusters associated with the identified AA sequence. In case of a labeled experiment this is the total intensity of all the isotopic patterns in the label cluster.
Intensity 3_4	Summed up eXtracted Ion Current (XIC) of all isotopic clusters associated with the identified AA sequence. In case of a labeled experiment this is the total intensity of all the isotopic patterns in the label cluster.
Intensity 3_5	Summed up eXtracted Ion Current (XIC) of all isotopic clusters associated with the identified AA sequence. In case of a labeled experiment this is the total intensity of all the isotopic patterns in the label cluster.
Intensity 5_1	Summed up eXtracted Ion Current (XIC) of all isotopic clusters associated with the identified AA sequence. In case of a labeled experiment this is the total intensity of all the isotopic patterns in the label cluster.
Intensity 5_2	Summed up eXtracted Ion Current (XIC) of all isotopic clusters associated with the identified AA sequence. In case of a labeled experiment this is the total intensity of all the isotopic patterns in the label cluster.
Intensity 5_3	Summed up eXtracted Ion Current (XIC) of all isotopic clusters associated with the identified AA sequence. In case of a labeled experiment this is the total intensity of all the isotopic patterns in the label cluster.
Intensity 5_4	Summed up eXtracted Ion Current (XIC) of all isotopic clusters associated with the identified AA sequence. In case of a labeled experiment this is the total intensity of all the isotopic patterns in the label cluster.
Intensity 5_5	Summed up eXtracted Ion Current (XIC) of all isotopic clusters associated with the identified AA sequence. In case of a labeled experiment this is the total intensity of all the isotopic patterns in the label cluster.
Intensity 6_1	Summed up eXtracted Ion Current (XIC) of all isotopic clusters associated with the identified AA sequence. In case of a labeled experiment this is the total intensity of all the isotopic patterns in the label cluster.
Intensity 6_2	Summed up eXtracted Ion Current (XIC) of all isotopic clusters associated with the identified AA sequence. In case of a labeled experiment this is the total intensity of all the isotopic patterns in the label cluster.
Intensity 6_3	Summed up eXtracted Ion Current (XIC) of all isotopic clusters associated with the identified AA sequence. In case of a labeled experiment this is the total intensity of all the isotopic patterns in the label cluster.
Intensity 6_4	Summed up eXtracted Ion Current (XIC) of all isotopic clusters associated with the identified AA sequence. In case of a labeled experiment this is the total intensity of all the isotopic patterns in the label cluster.
Intensity 6_5	Summed up eXtracted Ion Current (XIC) of all isotopic clusters associated with the identified AA sequence. In case of a labeled experiment this is the total intensity of all the isotopic patterns in the label cluster.
Intensity 6_6	Summed up eXtracted Ion Current (XIC) of all isotopic clusters associated with the identified AA sequence. In case of a labeled experiment this is the total intensity of all the isotopic patterns in the label cluster.
Only identified by site	When marked with '+', this particular protein group was identified only by a modification site.
Reverse	When marked with '+', this particular protein group contains no protein, made up of at least 50% of the peptides of the leading protein, with a peptide derived from the reversed part of the decoy database. These should be removed for further data analysis. The 50% rule is in place to prevent spurious protein hits to erroneously flag the protein group as reverse
Potential contaminant	When marked with '+', this particular protein group was found to be a commonly occurring contaminant. These should be removed for further data analysis.
id	A unique (consecutive) identifier for each row in the proteinGroups table, which is used to cross-link the information in this file with the information stored in the other files.
Peptide IDs	Identifier(s) of the associated peptide sequence(s) summary, which can be found in the file 'peptides.txt'.
Peptide is razor	Indicates for each peptide ID if it is a razor or group unique peptide (true) or a non unique non razor peptide (false).
Best MS/MS	The identifier of the best (in terms of quality) MS/MS scans identifying the peptides of this protein, referenced against the msms table.
GlyGly (K) site IDs	Identifier(s) for site(s) associated with the protein group, which show(s) evidence of the modification, referenced against the appropriate modification site file.
Oxidation (M) site IDs	Identifier(s) for site(s) associated with the protein group, which show(s) evidence of the modification, referenced against the appropriate modification site file.
Phospho (STY) site IDs	Identifier(s) for site(s) associated with the protein group, which show(s) evidence of the modification, referenced against the appropriate modification site file.
GlyGly (K) site positions	Positions of the sites in the leading protein of this group.
Oxidation (M) site positions	Positions of the sites in the leading protein of this group.
Phospho (STY) site positions	Positions of the sites in the leading protein of this group.

## Sheet: All Proteins
Protein IDs	Majority protein IDs	Peptide counts (all)	Peptide counts (razor+unique)	Peptide counts (unique)	Protein names	Gene names	Fasta headers	Number of proteins	Peptides	Razor + unique peptides	Unique peptides	Peptides 0_1	Peptides 0_2	Peptides 0_3	Peptides 0_4	Peptides 1_1	Peptides 1_2	Peptides 1_3	Peptides 1_4	Peptides 2_1	Peptides 2_2	Peptides 2_3	Peptides 2_4	Peptides 2_5	Peptides 2_6	Peptides 2_7	Peptides 3_1	Peptides 3_2	Peptides 3_3	Peptides 3_4	Peptides 3_5	Peptides 5_1	Peptides 5_2	Peptides 5_3	Peptides 5_4	Peptides 5_5	Peptides 6_1	Peptides 6_2	Peptides 6_3	Peptides 6_4	Peptides 6_5	Peptides 6_6	Razor + unique peptides 0_1	Razor + unique peptides 0_2	Razor + unique peptides 0_3	Razor + unique peptides 0_4	Razor + unique peptides 1_1	Razor + unique peptides 1_2	Razor + unique peptides 1_3
A0A0B7P3V8;Q6Q5P6;P47023	A0A0B7P3V8	3;1;1	1;0;0	1;0;0		YPL060C-A		3	3	1	1	1	1	2	1	0	0	1	0	0	0	0	1	1	2	0	1	1	0	0	0	2	1	0	0	0	2	2	1	1	0	0	0	0	0	0	0	0	0
CON__ENSEMBL:ENSBTAP00000016285	CON__ENSEMBL:ENSBTAP00000016285	1	1	1				1	1	1	1	1	1	1	1	1	0	1	0	1	1	1	0	0	0	0	1	1	1	0	0	1	1	1	0	0	0	1	1	0	0	0	1	1	1	1	1	0	1
CON__H-INV:HIT000292931;CON__P05787	CON__H-INV:HIT000292931;CON__P05787	1;1	1;1	1;1			;	2	1	1	1	0	0	0	0	0	0	0	0	1	1	1	1	0	0	0	1	1	1	1	0	0	1	1	1	1	1	1	1	1	0	1	0	0	0	0	0	0	0
CON__P00711	CON__P00711	1	1	1				1	1	1	1	0	0	0	0	0	0	0	0	0	0	0	0	0	0	0	0	0	0	0	1	0	0	0	0	1	0	0	0	0	0	1	0	0	0	0	0	0	0
CON__P02584	CON__P02584	1	1	1				1	1	1	1	0	0	0	0	0	0	0	0	0	0	0	0	0	0	0	0	0	0	0	0	0	0	0	0	0	0	0	0	0	1	0	0	0	0	0	0	0	0
CON__P02769	CON__P02769	8	8	7				1	8	8	7	0	0	2	1	0	0	0	0	0	0	0	0	0	6	4	0	0	0	0	1	0	0	0	0	3	0	0	0	0	0	0	0	0	2	1	0	0	0
CON__P0C1U8	CON__P0C1U8	10	10	10				1	10	10	10	3	3	7	7	5	1	7	4	3	3	3	1	0	0	4	4	4	3	2	0	4	3	5	3	0	3	4	3	5	0	0	3	3	7	7	5	1	7
CON__P15636	CON__P15636	5	5	5				1	5	5	5	4	4	4	4	4	4	4	4	4	4	4	3	1	2	1	4	4	4	3	1	4	4	4	4	1	4	4	4	4	1	1	4	4	4	4	4	4	4
O13297	O13297	7	7	7	mRNA-capping enzyme subunit beta	CET1		1	7	7	7	1	2	2	1	1	1	2	3	1	1	2	2	2	5	4	1	1	1	3	1	1	1	1	1	1	2	1	1	3	1	1	1	2	2	1	1	1	2
O13329	O13329	8	8	8	DNA replication fork-blocking protein FOB1	FOB1		1	8	8	8	7	8	7	7	7	6	6	6	6	7	4	5	4	3	7	6	3	3	5	2	3	4	3	3	0	5	5	3	1	1	1	7	8	7	7	7	6	6
O13516;P05755	O13516;P05755	6;5	6;5	6;5	40S ribosomal protein S9-A;40S ribosomal protein S9-B	RPS9A;RPS9B	;	2	6	6	6	1	2	1	2	2	1	2	2	2	1	1	2	1	2	4	1	1	1	3	1	1	1	1	4	1	1	2	1	1	0	1	1	2	1	2	2	1	2
Q99231;Q92393;Q12316;Q12088;Q04670;Q03855;Q03619;P0C2I2;Q12193;P0C2J0;O13535;Q07793;Q99337;Q12414;Q12273;Q12269;Q12141;Q04711;Q03612;Q03434;P47100;P47098;P0C2J1;P0C2I9;P0C2I6;P0C2I3;Q12441;Q12217;Q03856;P0CX69;P0CX68;P0CX67;P0CX66;P0CX65;P0CX60;P0CX59;P0C2I4;P0C2I5;Q92392;Q6Q5H1;Q12485;Q12470;Q12085;Q04706;P47099;P0CX76;P0CX75;P0CX74;P0CX73;P0CX72;P0CX71;P0CX70;P0CX58;P0CX57;P0C2I8;O74302;Q12112;…	Q99231;Q92393;Q12316;Q12088;Q04670;Q03855;Q03619;P0C2I2;Q12193;P0C2J0;O13535;Q07793;Q99337;Q12414;Q12273;Q12269;Q12141;Q04711;Q03612;Q03434;P47100;P47098;P0C2J1;P0C2I9;P0C2I6;P0C2I3;Q12441;Q12217;Q03856;P0CX69;P0CX68;P0CX67;P0CX66;P0CX65;P0CX60;P0CX59;P0C2I4;P0C2I5	5;5;5;5;5;5;5;5;5;5;5;4;4;4;4;4;4;4;4;4;4;4;4;4;4;4;3;3;3;3;3;3;3;3;3;3;3;3;2;2;2;2;2;2;2;2;2;2;2;2;2;2;2;2;2;2;2;1	4;4;4;4;4;4;4;4;4;4;4;3;3;3;3;3;3;3;3;3;3;3;3;3;3;3;3;3;3;3;3;3;3;3;3;3;3;2;2;2;2;2;2;2;2;2;2;2;2;2;2;2;2;2;2;2;1;0	3;3;3;3;3;3;3;3;3;3;3;2;2;2;2;2;2;2;2;2;2;2;2;2;2;2;3;3;3;3;3;3;3;3;3;3;3;2;2;2;2;2;2;2;2;2;2;2;2;2;2;2;2;2;2;2;0;0	Transposon Ty1-DR3 Gag-Pol polyprotein;Capsid protein;Ty1 protease;Integrase;Reverse transcriptase/ribonuclease H;Transposon Ty1-OR Gag-Pol polyprotein;Capsid protein;Ty1 protease;Integrase;Reverse transcriptase/ribonuclease H;Transposon Ty1-GR3 Gag-Pol polyprotein;Capsid protein;Ty1 protease;Integrase;Reverse transcriptase/ribonuclease H;Transposon Ty1-LR1 Gag-Pol polyprotein;Capsid protein;Ty1 …	TY1B-DR3;TY1B-OR;TY1B-GR3;TY1B-LR1;TY1B-MR2;TY1B-DR1;TY1B-ER2;TY1B-DR5;TY1B-BR;TY1B-PR2;TY1B-H;TY1B-DR4;TY1B-NL2;TY1B-PL;TY1B-OL;TY1B-GR2;TY1B-GR1;TY1B-ML1;TY1B-ER1;TY1B-ML2;TY1B-JR2;TY1B-JR1;TY1B-PR3;TY1B-PR1;TY1B-LR3;TY1B-DR6;TY1A-DR3;TY1A-BR;TY1A-DR1;TY1A-MR2;TY1A-LR1;TY1A-GR3;TY1A-ER2;TY1A-DR5;TY1A-PR2;TY1A-OR;TY1A-H;TY1B-LR2	;;;;;;;;;;;;;;;;;;;;;;;;;;;;;;;;;;;;;	58	5	4	3	0	2	3	4	0	1	4	3	0	0	1	1	1	1	0	0	0	0	2	0	0	0	0	2	1	0	0	1	1	0	0	0	2	2	3	0	1	4
O14455;P05745	O14455;P05745	5;3	5;3	5;3	60S ribosomal protein L36-B;60S ribosomal protein L36-A	RPL36B;RPL36A	;	2	5	5	5	2	0	2	2	0	0	0	2	2	0	0	2	0	2	4	2	0	0	2	1	1	1	1	1	2	2	0	0	1	0	0	2	0	2	2	0	0	0
O14467	O14467	8	8	8	Multiprotein-bridging factor 1	MBF1		1	8	8	8	2	3	6	5	5	3	3	4	4	6	3	4	3	0	5	7	7	3	7	1	5	5	8	5	2	6	6	7	7	1	3	2	3	6	5	5	3	3
O43137	O43137	4	4	4	Uncharacterized protein YBR085C-A	YBR085C-A		1	4	4	4	0	0	1	1	0	0	1	1	0	0	0	1	0	1	1	0	1	0	2	0	0	0	0	0	0	0	0	0	1	0	0	0	0	1	1	0	0	1
O94742	O94742	2	2	2	26S proteasome complex subunit SEM1	SEM1		1	2	2	2	1	0	0	0	0	0	0	1	0	0	0	1	0	0	2	1	1	0	2	0	0	0	0	1	0	0	0	1	0	0	0	1	0	0	0	0	0	0
P00044	P00044	6	6	6	Cytochrome c iso-1	CYC1		1	6	6	6	1	0	2	3	2	0	3	2	1	0	0	2	0	1	5	1	0	0	2	0	1	0	1	0	2	1	0	0	0	0	0	1	0	2	3	2	0	3
P00045	P00045	1	1	1	Cytochrome c iso-2	CYC7		1	1	1	1	0	0	0	0	0	0	0	0	0	0	0	0	0	0	1	0	0	0	0	0	0	0	0	0	0	0	0	0	0	0	0	0	0	0	0	0	0	0
P00127	P00127	1	1	1	Cytochrome b-c1 complex subunit 6	QCR6		1	1	1	1	0	0	0	0	0	1	1	0	0	1	1	0	0	0	0	0	1	1	0	0	1	1	0	0	0	0	0	1	0	0	0	0	0	0	0	0	1	1
P00128	P00128	1	1	1	Cytochrome b-c1 complex subunit 7	QCR7		1	1	1	1	0	0	0	0	0	0	1	0	0	0	1	0	0	1	0	0	0	0	0	0	0	1	0	0	1	0	0	1	0	0	0	0	0	0	0	0	0	1
P00175	P00175	2	2	2	Cytochrome b2, mitochondrial	CYB2		1	2	2	2	0	0	0	0	0	0	1	0	0	0	1	1	0	0	1	1	1	0	0	0	0	1	1	1	1	0	1	0	0	0	1	0	0	0	0	0	0	1
P00330	P00330	41	41	24	Alcohol dehydrogenase 1	ADH1		1	41	41	24	20	16	17	19	26	25	31	25	23	24	27	17	17	18	18	18	21	20	27	11	19	19	22	18	13	18	21	24	21	7	10	20	16	17	19	26	25	31
P00331	P00331	31	17	16	Alcohol dehydrogenase 2	ADH2		1	31	17	16	12	10	11	14	18	15	18	17	16	14	16	11	5	11	13	11	14	12	17	5	9	10	11	11	9	10	12	12	15	4	4	4	5	5	7	11	9	9
P00358	P00358	29	3	0	Glyceraldehyde-3-phosphate dehydrogenase 2	TDH2		1	29	3	0	13	11	14	14	13	9	14	14	12	11	12	11	14	17	13	12	12	9	15	9	10	13	12	13	8	12	12	11	13	2	10	1	0	0	0	0	0	0
P00359	P00359	34	34	8	Glyceraldehyde-3-phosphate dehydrogenase 3	TDH3		1	34	34	8	13	12	15	17	14	10	18	17	13	13	14	12	16	18	15	13	14	11	16	11	11	15	12	16	11	13	14	13	14	2	11	13	12	15	17	14	10	18
P00360	P00360	13	1	1	Glyceraldehyde-3-phosphate dehydrogenase 1	TDH1		1	13	1	1	7	5	6	8	8	5	7	8	6	6	6	7	7	8	8	6	7	6	9	4	6	6	7	6	4	6	6	6	6	2	6	0	0	0	1	0	0	0
P00410	P00410	1	1	1	Cytochrome c oxidase subunit 2	COX2		1	1	1	1	0	1	0	0	0	0	1	0	1	1	0	0	0	0	0	0	1	0	0	0	0	0	0	0	0	0	0	0	0	0	0	0	1	0	0	0	0	1
P00445	P00445	8	8	8	Superoxide dismutase [Cu-Zn]	SOD1		1	8	8	8	6	4	5	5	7	7	7	6	6	8	7	5	6	3	5	6	8	5	5	5	7	6	7	4	6	6	7	6	5	3	5	6	4	5	5	7	7	7
P00447	P00447	4	4	4	Superoxide dismutase [Mn], mitochondrial	SOD2		1	4	4	4	0	1	0	2	2	2	2	3	2	2	3	2	0	1	2	2	2	2	2	1	2	2	2	1	1	2	2	3	2	0	1	0	1	0	2	2	2	2
P00549	P00549	12	12	12	Pyruvate kinase 1	CDC19		1	12	12	12	4	3	2	3	4	7	9	4	6	7	8	2	3	7	5	2	4	7	3	4	5	8	2	2	6	2	3	6	1	0	6	4	3	2	3	4	7	9
P00560	P00560	38	38	38	Phosphoglycerate kinase	PGK1		1	38	38	38	14	15	12	11	12	10	13	13	13	13	14	11	11	22	13	6	10	10	20	4	8	10	9	12	7	9	10	11	14	0	6	14	15	12	11	12	10	13
P00724	P00724	2	2	2	Invertase 2	SUC2		1	2	2	2	0	0	0	0	0	1	1	0	1	1	0	0	0	2	0	0	0	1	0	0	1	1	0	0	0	0	0	0	0	0	1	0	0	0	0	0	1	1
P00729	P00729	4	4	4	Carboxypeptidase Y	PRC1		1	4	4	4	0	0	0	1	2	2	2	3	2	2	2	1	0	2	0	2	2	2	1	1	2	2	2	2	1	1	2	2	1	0	1	0	0	0	1	2	2	2
P00812	P00812	7	7	7	Arginase	CAR1		1	7	7	7	1	0	0	0	1	1	3	1	3	2	2	0	0	3	1	1	3	3	1	1	2	2	3	3	2	1	3	2	0	0	2	1	0	0	0	1	1	3
P00815	P00815	1	1	1	Histidine biosynthesis trifunctional protein;Phosphoribosyl-AMP cyclohydrolase;Phosphoribosyl-ATP pyrophosphohydrolase;Histidinol dehydrogenase	HIS4		1	1	1	1	0	0	0	1	1	1	1	1	1	1	1	1	0	0	1	1	1	1	1	0	1	1	1	1	0	1	1	1	1	0	0	0	0	0	1	1	1	1
P00817	P00817	17	17	17	Inorganic pyrophosphatase	IPP1		1	17	17	17	3	4	5	3	8	7	7	4	11	6	7	3	4	7	5	4	6	8	6	3	7	7	7	6	6	4	8	8	3	0	5	3	4	5	3	8	7	7
P00890;P08679	P00890	10;1	10;1	10;1	Citrate synthase, mitochondrial	CIT1		2	10	10	10	2	2	2	2	2	1	1	2	2	2	2	3	2	4	4	2	2	1	1	0	1	1	2	2	0	1	2	1	1	0	0	2	2	2	2	2	1	1
P00924	P00924	21	6	6	Enolase 1	ENO1		1	21	6	6	3	2	3	3	6	5	12	5	11	9	12	4	2	8	9	2	3	6	6	2	4	10	3	3	5	2	3	7	3	0	2	2	1	2	1	3	3	3
P00925	P00925	29	29	14	Enolase 2	ENO2		1	29	29	14	1	3	3	2	6	5	11	8	11	10	13	4	0	13	9	1	4	6	5	2	5	10	4	3	7	2	4	7	3	0	5	1	3	3	2	6	5	11
P00931	P00931	2	2	2	Tryptophan synthase	TRP5		1	2	2	2	0	0	2	1	1	2	1	2	0	0	0	0	1	1	0	1	1	1	1	1	1	1	2	1	0	1	1	2	2	0	1	0	0	2	1	1	2	1
P00942	P00942	14	14	14	Triosephosphate isomerase	TPI1		1	14	14	14	0	0	2	0	2	3	7	3	5	6	8	0	1	10	4	1	4	3	1	2	4	5	2	0	5	2	4	5	0	0	4	0	0	2	0	2	3	7
P00950	P00950	9	9	9	Phosphoglycerate mutase 1	GPM1		1	9	9	9	4	4	5	5	5	6	4	6	4	5	5	5	2	5	2	2	4	3	6	0	4	3	3	5	3	4	2	3	6	2	1	4	4	5	5	5	6	4
P01094	P01094	3	3	3	Protease A inhibitor 3	PAI3		1	3	3	3	1	0	1	0	1	0	1	0	1	1	1	0	1	1	2	1	1	1	3	2	0	1	0	1	0	0	1	0	1	1	0	1	0	1	0	1	0	1
P01097	P01097	2	2	2	ATPase inhibitor, mitochondrial	INH1		1	2	2	2	2	1	2	2	2	2	2	2	2	2	0	2	1	0	0	2	1	0	1	0	1	1	1	2	0	1	1	2	2	0	0	2	1	2	2	2	2	2
P01098	P01098	1	1	1	ATPase-stabilizing factor 9 kDa, mitochondrial	STF1		1	1	1	1	1	1	0	1	1	1	0	0	1	0	0	0	0	0	1	0	0	0	1	0	1	0	0	0	0	0	0	0	1	0	0	1	1	0	1	1	1	0
P02293	P02293	15	2	2	Histone H2B.1	HTB1		1	15	2	2	7	8	7	9	10	11	11	10	11	10	12	10	6	5	7	12	10	11	10	8	10	12	11	10	7	11	11	11	10	5	6	1	1	1	0	1	1	1
P02294	P02294	15	15	2	Histone H2B.2	HTB2		1	15	15	2	7	8	7	10	10	11	11	11	11	10	12	12	7	5	8	12	10	11	11	8	11	12	11	11	7	11	11	11	11	6	6	7	8	7	10	10	11	11
P02309	P02309	6	6	6	Histone H4	HHF1		1	6	6	6	4	4	4	2	4	4	4	2	4	4	4	2	2	4	1	4	4	4	2	4	4	4	4	2	4	4	4	4	2	2	4	4	4	4	2	4	4	4
P02381	P02381	1	1	1	Ribosomal protein VAR1, mitochondrial	VAR1		1	1	1	1	0	0	0	0	0	0	0	0	0	0	0	0	0	1	0	0	0	0	0	0	0	0	0	0	0	0	1	0	0	0	0	0	0	0	0	0	0	0
P02406	P02406	26	26	26	60S ribosomal protein L28	RPL28		1	26	26	26	17	18	19	17	18	17	18	17	19	18	17	16	14	18	13	16	18	15	16	13	18	17	17	16	16	17	18	16	18	13	14	17	18	19	17	18	17	18
;118940;118941;118942;118943;118944;118945;118946;118947;118948;118949;118950;118951;118952;118953;118954;118955;118956;118957;118958;118959;118960;118961;118962;118963;118964;118965;118966;118967;118968;118969;118970;118971;118972;118973;118974;118975;118976;118977;118978;118979;118980;118981;118982;118983;118984;118985;118986;118987;118988;118989;118990;118991;118992;118993;118994;118995;118996…
9;123620;123621;123622;123623;123624;123625;123626;123627;123628;123629;123630;123631;123632;123633;123634;123635;123636;123637;123638;123639;123640;123641;123642;123643;123644;123645;123646;123647;123648;123649;123650;123651;123652;123653;123654;123655;123656;123657;123658;123659;123660;123661;123662;123663;123664;123665;123666;123667;123668;123669;123670;123671;123672;123673;123674;123675;12367…
99;128300;128301;128302;128303;128304;128305;128306;128307;128308;128309;128310;128311;128312;128313;128314;128315;128316;128317;128318;128319;128320;128321;128322;128323;128324;128325;128326;128327;128328;128329;128330;128331;128332;128333;128334;128335;128336;128337;128338;128339;128340;128341;128342;128343;128344;128345;128346;128347;128348;128349;128350;128351;128352;128353;128354;128355;1283…
350;135351;135352;135353;135354;135355;135356;135357;135358;135359;135360;135361;135362;135363;135364;135365;135366;135367;135368;135369;135370;135371;135372;135373;135374;135375;135376;135377;135378;135379;135380;135381;135382;135383;135384;135385;135386;135387;135388;135389;135390;135391;135392;135393;135394;135395;135396;135397;135398;135399;135400;135401;135402;135403;135404;135405;135406;135…
5869;395870;395871;395872;395873;395874;395875;395876;395877;395878;395879;395880;395881;395882;395883;395884;395885;395886;395887;395888;395889;395890;395891;395892;395893;395894;395895;395896;395897;395898;395899;395900;395901;395902;395903;395904;395905;395906;395907;395908;395909;395910;395911;395912;395913;395914;395915;395916;395917;395918;395919;395920;395921;395922;395923;395924;395925;39…	21897;21981;34223;55344;55796;92474;93333;120409;131327;134898;136378;154894;157690;158030;188042;217024;217264;217401;217490;244201;252439;273662;311704;362340;395826;396123	157;158;159;160;161;162;163;164;165	23;24;25		55;86;92;96;111;115;126;132;137	34;45;58
P14127;P02407	P14127;P02407	14;14	14;14	14;14	40S ribosomal protein S17-B;40S ribosomal protein S17-A	RPS17B;RPS17A	;	2	14	14	14	7	7	6	8	8	5	8	7	8	5	4	10	4	3	4	5	7	3	10	3	5	5	5	8	4	6	6	6	6	1	2	7	7	6	8	8	5	8
P02557	P02557	5	5	5	Tubulin beta chain	TUB2		1	5	5	5	0	0	0	1	1	1	2	2	1	1	1	1	0	1	0	1	0	2	1	0	2	4	1	1	0	2	2	2	2	0	2	0	0	0	1	1	1	2
P02829	P02829	13	4	4	ATP-dependent molecular chaperone HSP82	HSP82		1	13	4	4	3	2	5	4	3	1	2	4	4	3	2	3	1	7	4	6	4	4	6	1	3	4	5	5	2	5	7	5	4	0	1	2	2	2	2	2	0	1
P02992	P02992	7	7	7	Elongation factor Tu, mitochondrial	TUF1		1	7	7	7	4	4	4	5	4	5	5	4	5	5	5	2	2	3	3	3	4	5	5	1	5	4	4	3	3	4	4	4	2	0	3	4	4	4	5	4	5	5
P02994	P02994	37	37	37	Elongation factor 1-alpha	TEF1		1	37	37	37	16	16	18	19	21	23	21	19	23	23	17	13	11	12	15	17	20	17	21	9	17	18	17	17	6	17	22	17	18	7	10	16	16	18	19	21	23	21
P03069	P03069	3	3	3	General control protein GCN4	GCN4		1	3	3	3	1	1	3	1	1	1	1	0	1	1	1	0	1	1	1	0	1	1	2	1	1	1	0	1	0	0	0	0	0	0	1	1	1	3	1	1	1	1
P03870	P03870	9	9	9	Site-specific recombinase Flp	FLP1		1	9	9	9	5	5	5	5	5	5	5	4	5	5	5	6	2	3	5	7	5	5	6	2	5	5	5	6	2	7	6	7	5	1	3	5	5	5	5	5	5	5
P03871	P03871	4	4	4	Partitioning protein REP1	REP1		1	4	4	4	0	1	1	0	0	0	0	0	0	0	0	0	0	3	0	1	1	0	1	0	0	0	0	0	0	1	1	0	0	0	0	0	1	1	0	0	0	0
P03872	P03872	13	13	13	Partitioning protein REP2	REP2		1	13	13	13	6	5	7	2	7	4	7	4	6	8	5	3	5	9	7	7	8	5	7	4	6	5	6	7	4	7	7	6	5	0	4	6	5	7	2	7	4	7
P03962	P03962	8	8	8	Orotidine 5-phosphate decarboxylase	URA3		1	8	8	8	1	0	0	0	1	0	1	1	2	0	2	0	1	3	4	0	0	0	1	0	1	0	2	0	3	0	0	1	1	0	0	1	0	0	0	1	0	1
P04037	P04037	14	14	14	Cytochrome c oxidase subunit 4, mitochondrial	COX4		1	14	14	14	4	0	3	4	6	5	8	5	2	4	4	2	4	2	2	2	2	1	6	2	3	2	6	2	3	1	1	1	4	1	1	4	0	3	4	6	5	8
P04046	P04046	2	2	2	Amidophosphoribosyltransferase	ADE4		1	2	2	2	1	1	1	1	1	0	0	0	1	0	0	0	0	1	0	0	0	0	0	0	0	1	0	0	0	0	0	0	1	0	0	1	1	1	1	1	0	0
P04050	P04050	1	1	1	DNA-directed RNA polymerase II subunit RPB1	RPO21		1	1	1	1	1	1	1	0	0	0	0	0	1	1	0	0	0	0	1	1	0	0	1	0	1	1	0	0	0	1	1	1	0	0	0	1	1	1	0	0	0	0
P04076	P04076	1	1	1	Argininosuccinate lyase	ARG4		1	1	1	1	1	1	1	1	0	1	0	0	0	0	0	1	0	0	1	0	0	0	0	0	0	0	0	0	0	0	1	0	1	1	0	1	1	1	1	0	1	0
P04147	P04147	2	2	2	Polyadenylate-binding protein, cytoplasmic and nuclear	PAB1		1	2	2	2	0	0	0	0	0	0	0	1	0	0	0	0	0	1	1	0	0	0	1	0	0	0	0	0	1	0	0	0	0	0	0	0	0	0	0	0	0	0
P04386	P04386	5	5	5	Regulatory protein GAL4	GAL4		1	5	5	5	1	1	1	1	2	2	1	1	1	2	0	1	0	3	1	2	1	0	1	0	0	0	1	1	0	3	2	2	1	0	0	1	1	1	1	2	2	1
P04449	P04449	14	14	4	60S ribosomal protein L24-A	RPL24A		1	14	14	4	6	5	7	8	7	5	6	8	8	3	3	4	5	7	9	8	6	5	9	3	5	4	5	7	5	8	4	2	6	2	4	6	5	7	8	7	5	6
P04456	P04456	12	12	12	60S ribosomal protein L25	RPL25		1	12	12	12	9	7	8	10	9	8	7	9	7	8	7	10	6	5	11	8	6	8	10	6	8	7	7	10	7	5	7	8	10	4	4	9	7	8	10	9	8	7
P04710	P04710	1	1	1	ADP,ATP carrier protein 1	AAC1		1	1	1	1	0	0	0	0	0	0	0	0	0	0	1	0	0	0	0	1	1	0	0	0	0	0	0	0	0	0	1	1	0	0	0	0	0	0	0	0	0	0
P04786	P04786	9	9	9	DNA topoisomerase 1	TOP1		1	9	9	9	5	4	4	3	4	4	3	3	4	3	0	1	4	6	4	4	4	2	3	2	1	3	3	2	1	3	3	1	1	0	2	5	4	4	3	4	4	3
P04802	P04802	6	6	6	Aspartate--tRNA ligase, cytoplasmic	DPS1		1	6	6	6	6	5	5	3	5	6	6	3	5	4	5	3	1	0	0	5	4	2	3	1	4	5	4	3	1	4	4	4	3	0	2	6	5	5	3	5	6	6
P04803	P04803	2	2	2	Tryptophan--tRNA ligase, mitochondrial	MSW1		1	2	2	2	0	0	0	0	0	1	0	0	0	0	1	0	0	0	0	0	0	1	0	0	0	0	0	0	1	0	0	1	0	0	0	0	0	0	0	0	1	0
P04806;P04807	P04806	7;2	7;2	7;2	Hexokinase-1	HXK1		2	7	7	7	2	1	3	4	1	1	2	3	2	3	2	3	3	1	2	2	3	2	4	0	2	3	1	3	0	1	1	2	3	0	0	2	1	3	4	1	1	2
P04840	P04840	8	8	8	Mitochondrial outer membrane protein porin 1	POR1		1	8	8	8	0	0	1	0	1	1	4	0	2	2	3	0	0	6	2	1	1	3	0	2	3	2	1	1	3	1	2	3	0	0	1	0	0	1	0	1	1	4
P04911	P04911	7	7	2	Histone H2A.1	HTA1		1	7	7	2	4	4	4	5	4	3	3	5	4	4	4	5	5	3	2	4	4	4	5	3	6	5	4	5	4	5	5	5	5	0	3	4	4	4	5	4	3	3
P04912	P04912	7	2	2	Histone H2A.2	HTA2		1	7	2	2	4	4	4	4	4	3	3	5	4	4	4	5	5	1	2	4	4	4	5	3	6	5	4	4	4	5	5	5	5	0	3	2	2	2	1	2	2	2
P05150	P05150	1	1	1	Ornithine carbamoyltransferase	ARG3		1	1	1	1	0	0	0	0	1	1	1	1	0	1	1	0	0	1	0	0	0	1	0	0	1	1	0	0	1	1	0	0	0	0	1	0	0	0	0	1	1	1
P05319	P05319	1	1	1	60S acidic ribosomal protein P2-alpha	RPP2A		1	1	1	1	1	1	1	0	1	1	1	1	1	0	0	0	0	1	0	0	0	0	0	0	0	0	0	0	1	0	0	0	1	0	0	1	1	1	0	1	1	1
P05373	P05373	5	5	5	Delta-aminolevulinic acid dehydratase	HEM2		1	5	5	5	0	0	0	0	2	2	2	3	1	2	2	0	1	2	1	1	1	2	2	1	1	1	1	0	2	1	1	1	2	1	0	0	0	0	0	2	2	2
P05694	P05694	2	2	2	5-methyltetrahydropteroyltriglutamate--homocysteine methyltransferase	MET6		1	2	2	2	0	0	0	0	0	0	1	0	0	1	1	0	0	0	0	0	0	1	0	0	1	0	0	0	2	0	0	0	0	0	1	0	0	0	0	0	0	1
P05737	P05737	14	14	2	60S ribosomal protein L7-A	RPL7A		1	14	14	2	2	4	7	6	4	4	4	7	2	4	4	4	1	7	5	3	4	3	8	5	6	2	2	7	3	3	3	4	4	0	3	2	4	7	6	4	4	4
P05738	P05738	18	18	3	60S ribosomal protein L9-A	RPL9A		1	18	18	3	8	6	8	5	8	8	7	7	12	7	5	5	3	9	7	6	6	7	9	3	8	5	6	9	3	5	9	7	7	1	2	8	6	8	5	8	8	7
P05739	P05739	2	1	1	60S ribosomal protein L6-B	RPL6B		1	2	1	1	0	0	0	1	0	0	0	1	1	0	0	1	1	0	1	1	0	0	1	0	0	1	0	1	2	1	1	1	1	0	0	0	0	0	1	0	0	0
P46990;P05740	P46990;P05740	7;7	7;7	7;7	60S ribosomal protein L17-B;60S ribosomal protein L17-A	RPL17B;RPL17A	;	2	7	7	7	1	2	0	2	2	2	1	2	3	1	2	0	0	5	2	2	1	2	4	0	1	2	1	2	1	2	1	1	2	0	0	1	2	0	2	2	2	1
P05744	P05744	7	7	1	60S ribosomal protein L33-A	RPL33A		1	7	7	1	3	5	5	5	5	3	4	4	4	3	5	5	1	2	3	2	2	2	4	1	2	3	1	4	2	3	3	2	3	0	0	3	5	5	5	5	3	4
P05747	P05747	7	7	7	60S ribosomal protein L29	RPL29		1	7	7	7	5	3	4	3	6	5	5	4	5	6	6	4	1	0	2	5	5	5	4	3	5	5	5	4	5	5	5	5	4	1	4	5	3	4	3	6	5	5
P05748;P54780	P05748;P54780	11;9	11;9	11;9	60S ribosomal protein L15-A;60S ribosomal protein L15-B	RPL15A;RPL15B	;	2	11	11	11	2	4	5	4	6	5	6	5	6	5	4	4	4	7	3	4	5	4	6	4	5	4	4	4	6	4	4	4	6	0	5	2	4	5	4	6	5	6
P05749;P56628	P05749;P56628	4;2	4;2	4;2	60S ribosomal protein L22-A;60S ribosomal protein L22-B	RPL22A;RPL22B	;	2	4	4	4	1	1	1	1	0	1	1	1	1	1	0	1	0	3	1	1	0	0	2	0	0	0	1	2	0	0	1	0	1	1	1	1	1	1	1	0	1	1
P05750	P05750	9	9	9	40S ribosomal protein S3	RPS3		1	9	9	9	3	3	2	3	5	4	4	2	4	5	5	1	2	3	2	4	4	5	3	2	5	7	2	3	3	4	5	4	2	0	3	3	3	2	3	5	4	4
P05756	P05756	8	8	8	40S ribosomal protein S13	RPS13		1	8	8	8	3	3	2	0	0	0	1	1	0	1	0	2	1	4	2	1	1	1	4	0	2	1	1	1	0	0	1	0	1	0	1	3	3	2	0	0	0	1
P05759;P0CG63	P05759	30;13	30;13	17;0	Ubiquitin-40S ribosomal protein S31;Ubiquitin;40S ribosomal protein S31	RPS31		2	30	30	17	19	15	18	18	18	19	21	18	20	19	18	19	13	13	21	15	17	16	22	11	17	15	14	18	10	17	16	13	20	5	9	19	15	18	18	18	19	21
P06100	P06100	1	1	1	General negative regulator of transcription subunit 2	CDC36		1	1	1	1	0	0	0	0	0	0	0	0	0	0	0	0	0	1	0	0	0	0	1	0	0	0	0	0	0	1	0	0	1	0	0	0	0	0	0	0	0	0
P06105	P06105	2	2	2	Protein SCP160	SCP160		1	2	2	2	0	0	0	0	0	0	0	0	0	0	0	0	0	2	0	0	0	0	0	0	0	0	0	0	0	0	0	0	0	0	0	0	0	0	0	0	0	0
P06106	P06106	29	29	29	Protein MET17;O-acetylhomoserine sulfhydrylase;O-acetylserine sulfhydrylase	MET17		1	29	29	29	19	22	20	22	20	20	23	22	15	19	16	17	11	8	4	15	19	13	17	9	13	16	15	22	7	14	16	13	20	8	8	19	22	20	22	20	20	23
P06168	P06168	2	2	2	Ketol-acid reductoisomerase, mitochondrial	ILV5		1	2	2	2	0	0	0	0	1	1	1	1	1	1	2	0	0	1	0	0	1	1	0	1	1	1	0	1	1	1	1	1	0	0	1	0	0	0	0	1	1	1
P06169;P26263	P06169	18;1	18;1	17;0	Pyruvate decarboxylase isozyme 1	PDC1		2	18	18	17	4	4	6	9	4	5	7	3	4	4	5	3	4	7	6	3	2	4	6	2	3	5	4	4	4	5	5	5	5	0	2	4	4	6	9	4	5	7
P06208	P06208	1	1	1	2-isopropylmalate synthase	LEU4		1	1	1	1	1	1	0	0	1	1	1	0	1	1	1	0	0	0	0	1	1	1	0	0	1	1	1	0	0	0	1	1	0	0	0	1	1	0	0	1	1	1
P06367;P39516	P06367;P39516	4;3	4;3	4;3	40S ribosomal protein S14-A;40S ribosomal protein S14-B	RPS14A;RPS14B	;	2	4	4	4	0	3	2	1	1	2	1	1	2	0	0	0	1	3	2	1	1	0	3	1	1	0	1	2	1	1	1	0	2	0	0	0	3	2	1	1	2	1
P06633	P06633	11	11	11	Imidazoleglycerol-phosphate dehydratase	HIS3		1	11	11	11	10	6	4	5	9	5	6	5	10	7	6	4	1	0	1	7	6	5	6	2	9	6	6	6	3	7	7	5	5	1	1	10	6	4	5	9	5	6
P06700	P06700	6	6	6	NAD-dependent histone deacetylase SIR2	SIR2		1	6	6	6	3	2	5	1	2	2	2	2	2	1	1	1	1	2	1	1	1	1	2	1	2	1	0	0	0	2	0	0	2	0	1	3	2	5	1	2	2	2
P06701	P06701	8	8	8	Regulatory protein SIR3	SIR3		1	8	8	8	1	2	3	3	3	4	2	3	3	3	2	4	2	6	4	4	2	1	2	1	1	3	1	2	0	4	4	3	1	0	0	1	2	3	3	3	4	2
P06738	P06738	2	2	2	Glycogen phosphorylase	GPH1		1	2	2	2	0	0	0	1	0	0	0	1	0	0	0	0	0	1	0	0	0	0	1	0	0	0	0	1	0	0	0	0	1	0	0	0	0	0	1	0	0	0
P06773	P06773	1	1	1	Deoxycytidylate deaminase	DCD1		1	1	1	1	0	0	0	1	1	1	0	1	0	0	0	0	1	0	0	0	0	0	1	0	0	0	0	1	0	1	0	0	1	0	1	0	0	0	1	1	1	0
P06776	P06776	12	12	12	3,5-cyclic-nucleotide phosphodiesterase 2	PDE2		1	12	12	12	10	10	8	3	6	10	6	1	8	8	4	5	4	2	1	7	7	3	0	4	5	5	5	1	3	6	6	5	5	0	4	10	10	8	3	6	10	6
P06777	P06777	1	1	1	DNA repair protein RAD1	RAD1		1	1	1	1	0	0	1	0	0	0	0	0	1	0	0	0	0	0	1	0	0	0	1	0	0	0	0	0	0	0	0	0	0	0	0	0	0	1	0	0	0	0
P06778	P06778	14	14	14	DNA repair and recombination protein RAD52	RAD52		1	14	14	14	1	1	1	1	1	1	1	1	3	1	2	2	1	4	5	10	5	4	8	3	7	9	8	8	2	12	8	10	7	1	4	1	1	1	1	1	1	1
P06780	P06780	2	2	2	GTP-binding protein RHO1	RHO1		1	2	2	2	0	0	0	1	1	1	1	1	1	1	1	0	1	1	1	1	0	1	1	1	1	1	0	0	2	0	1	1	0	0	1	0	0	0	1	1	1	1
P06782	P06782	42	42	42	Carbon catabolite-derepressing protein kinase	SNF1		1	42	42	42	25	25	30	31	17	20	27	22	18	19	23	21	12	17	14	19	17	19	22	7	15	18	19	21	8	17	19	19	23	6	9	25	25	30	31	17	20	27
P06786	P06786	11	11	11	DNA topoisomerase 2	TOP2		1	11	11	11	4	3	3	5	4	5	4	5	5	5	4	5	4	9	6	6	5	4	5	1	5	5	4	5	3	6	6	4	4	1	5	4	3	3	5	4	5	4
P06787	P06787	1	1	1	Calmodulin	CMD1		1	1	1	1	0	0	0	0	0	0	0	0	0	0	0	0	0	1	0	0	0	0	0	0	0	0	0	0	0	0	0	0	0	0	0	0	0	0	0	0	0	0
P07149	P07149	1	1	1	Fatty acid synthase subunit beta;3-hydroxyacyl-[acyl-carrier-protein] dehydratase;Enoyl-[acyl-carrier-protein] reductase [NADH];[Acyl-carrier-protein] acetyltransferase;[Acyl-carrier-protein] malonyltransferase;S-acyl fatty acid synthase thioesterase	FAS1		1	1	1	1	0	0	0	0	0	0	0	0	0	0	0	0	1	0	0	0	0	0	0	0	0	0	0	0	0	0	0	0	0	0	0	0	0	0	0	0	0	0
P07170	P07170	5	4	4	Adenylate kinase	ADK1		1	5	4	4	1	1	3	2	1	2	2	3	2	2	2	3	1	1	1	1	3	2	2	0	2	2	1	2	1	1	1	2	1	0	0	1	0	3	2	1	2	2
P07244	P07244	1	1	1	Bifunctional purine biosynthetic protein ADE5,7;Phosphoribosylamine--glycine ligase;Phosphoribosylformylglycinamidine cyclo-ligase	ADE5,7		1	1	1	1	0	0	0	0	1	1	1	0	1	1	0	1	0	0	0	1	1	1	0	0	1	1	1	0	0	0	0	0	0	0	0	0	0	0	0	1	1	1
P07245	P07245	1	1	1	C-1-tetrahydrofolate synthase, cytoplasmic;Methylenetetrahydrofolate dehydrogenase;Methenyltetrahydrofolate cyclohydrolase;Formyltetrahydrofolate synthetase	ADE3		1	1	1	1	0	0	0	0	0	0	0	1	0	0	0	1	0	0	0	0	0	0	0	0	0	0	0	0	0	0	0	0	0	0	0	0	0	0	0	0	0	0
P07246	P07246	10	5	4	Alcohol dehydrogenase 3, mitochondrial	ADH3		1	10	5	4	3	2	2	2	5	4	8	4	6	6	7	2	0	0	4	3	5	2	3	1	3	7	6	3	2	4	4	4	2	0	1	2	1	1	1	3	1	3
P07251	P07251	8	8	8	ATP synthase subunit alpha, mitochondrial	ATP1		1	8	8	8	1	1	1	1	2	1	5	1	5	5	4	0	0	6	2	1	1	3	0	1	4	5	1	0	4	1	1	3	0	0	2	1	1	1	1	2	1	5
P07256	P07256	1	1	1	Cytochrome b-c1 complex subunit 1, mitochondrial	COR1		1	1	1	1	0	0	0	0	0	0	0	0	1	1	1	0	0	1	0	0	1	1	0	0	1	1	0	0	1	0	0	1	0	0	1	0	0	0	0	0	0	0
P07260	P07260	2	2	2	Eukaryotic translation initiation factor 4E	CDC33		1	2	2	2	2	2	1	1	2	2	1	2	2	2	2	1	2	1	1	2	2	2	2	2	2	2	2	2	2	1	2	1	2	0	1	2	2	1	1	2	2	1
P07261	P07261	4	4	4	Glycolytic genes transcriptional activator GCR1	GCR1		1	4	4	4	2	2	2	2	1	0	0	1	2	0	0	0	0	3	2	1	0	0	1	0	0	0	0	0	0	0	0	0	0	0	0	2	2	2	2	1	0	0
P07267	P07267	2	2	2	Saccharopepsin	PEP4		1	2	2	2	0	0	0	0	0	1	0	0	0	0	1	0	0	1	0	0	0	0	0	0	0	0	0	0	1	0	0	1	0	0	0	0	0	0	0	0	1	0
P07269	P07269	2	2	2	Regulatory protein PHO2	PHO2		1	2	2	2	1	1	1	0	1	1	1	0	1	1	1	0	1	0	1	1	1	0	0	1	1	1	1	0	1	1	1	1	0	0	1	1	1	1	0	1	1	1
P07271	P07271	4	4	4	ATP-dependent DNA helicase PIF1	PIF1		1	4	4	4	0	0	0	1	1	1	1	1	1	0	1	1	1	0	2	4	2	2	3	2	2	2	3	1	0	4	2	2	1	0	1	0	0	0	1	1	1	1
P07273	P07273	2	2	2	Transcription elongation factor S-II	DST1		1	2	2	2	0	1	0	0	0	0	0	0	0	0	0	1	0	2	1	0	0	0	0	1	0	0	0	0	0	0	0	0	1	1	0	0	1	0	0	0	0	0
P07275	P07275	1	1	1	Delta-1-pyrroline-5-carboxylate dehydrogenase, mitochondrial	PUT2		1	1	1	1	0	0	0	0	0	0	0	0	0	0	0	0	0	1	0	0	0	0	0	0	0	0	0	0	1	0	0	0	0	0	1	0	0	0	0	0	0	0
P07281;P07280	P07281;P07280	7;7	7;7	7;7	40S ribosomal protein S19-B;40S ribosomal protein S19-A	RPS19B;RPS19A	;	2	7	7	7	4	0	4	3	4	3	2	2	3	1	0	3	1	3	3	3	4	3	6	3	5	3	3	5	1	3	0	1	0	1	1	4	0	4	3	4	3	2
P07283	P07283	2	2	2	Phosphomannomutase	SEC53		1	2	2	2	0	0	2	0	2	2	2	0	2	2	2	0	0	1	0	0	1	1	0	0	2	1	1	0	1	1	1	1	0	0	1	0	0	2	0	2	2	2
P07285	P07285	2	2	2	Anthranilate phosphoribosyltransferase	TRP4		1	2	2	2	2	2	2	1	2	2	2	1	2	2	1	1	2	2	0	2	2	2	1	1	2	2	2	1	1	2	2	2	1	1	1	2	2	2	1	2	2	2
P07342	P07342	2	2	2	Acetolactate synthase catalytic subunit, mitochondrial	ILV2		1	2	2	2	1	1	1	1	1	2	1	1	1	1	1	1	1	1	0	1	1	1	1	1	1	1	1	1	1	1	0	1	1	1	1	1	1	1	1	1	2	1
P07991	P07991	38	38	38	Ornithine aminotransferase	CAR2		1	38	38	38	26	23	29	30	28	28	30	31	28	27	24	28	16	14	7	29	28	29	34	13	25	30	26	31	11	29	26	27	31	17	14	26	23	29	30	28	28	30
116066;116067;116068;116069;116070;116071;116072;116073;116074;116075;116076;116077;116078;116079;116080;116081;116082;116083;116084;116085;116086;116087;116088;116089;116090;116091;116092;116093;116094;116095;116096;116097;116098;116099;116100;116101;116102;116103;116104;116105;116106;116107;116108;116109;116110;116111;116112;116113;116114;116115;116116;116117;116118;116119;116120;116121;116122;…
;244618;244619;244620;244621;244622;244623;244624;244625;244626;244627;244628;244629;244630;244631;244632;244633;244634;244635;244636;244637;244638;244639;244640;244641;244642;244643;244644;244645;244646;244647;244648;244649;244650;244651;244652;244653;244654;244655;244656;244657;244658;244659;244660;244661;244662;244663;244664;244665;244666;244667;244668;244669;244670;244671;244672;244673;244674…	2854;4428;4432;7530;11249;16993;17245;33065;33070;60106;69914;74415;82845;89984;115831;116057;116362;157551;157587;158956;158990;189385;190449;196106;201179;218507;241224;241405;244374;249884;286221;298712;298984;312635;352079;379259;380498;399967	396	68;69;70;71;72		44	107;127;291;357;382
P08067	P08067	4	4	4	Cytochrome b-c1 complex subunit Rieske, mitochondrial	RIP1		1	4	4	4	1	1	2	1	3	3	2	3	2	2	2	1	2	2	0	2	2	2	1	2	2	2	2	1	2	2	2	2	3	1	1	1	1	2	1	3	3	2
P08417	P08417	6	6	6	Fumarate hydratase, mitochondrial	FUM1		1	6	6	6	1	1	1	0	2	2	2	0	2	2	2	0	1	3	1	0	1	1	0	0	1	2	1	0	1	0	1	1	0	0	0	1	1	1	0	2	2	2
P08431	P08431	14	14	14	Galactose-1-phosphate uridylyltransferase	GAL7		1	14	14	14	0	0	1	0	0	0	0	0	0	0	0	0	0	0	0	0	0	0	0	0	0	0	0	2	0	5	5	4	11	7	3	0	0	1	0	0	0	0
P08524	P08524	2	2	2	Farnesyl pyrophosphate synthase	ERG20		1	2	2	2	0	0	0	1	1	1	1	1	1	1	1	1	0	1	0	0	1	0	1	0	1	0	0	1	0	0	1	0	1	0	0	0	0	0	1	1	1	1
P08566	P08566	3	3	3	Pentafunctional AROM polypeptide;3-dehydroquinate synthase;3-phosphoshikimate 1-carboxyvinyltransferase;Shikimate kinase;3-dehydroquinate dehydratase;Shikimate dehydrogenase	ARO1		1	3	3	3	1	1	1	1	1	1	1	1	1	1	1	1	1	1	0	1	1	1	1	1	1	1	1	2	1	1	1	1	1	0	1	1	1	1	1	1	1	1
P08678	P08678	12	12	12	Adenylate cyclase	CYR1		1	12	12	12	0	2	3	5	1	3	3	4	2	2	2	5	6	8	7	2	2	2	4	2	2	1	2	3	3	1	2	2	3	4	3	0	2	3	5	1	3	3
P09201	P09201	5	5	5	Fructose-1,6-bisphosphatase	FBP1		1	5	5	5	0	0	0	0	2	0	3	0	1	1	4	0	0	2	0	0	0	0	0	0	1	1	1	0	3	0	1	1	0	0	1	0	0	0	0	2	0	3
P09232	P09232	14	14	14	Cerevisin	PRB1		1	14	14	14	2	2	5	2	4	4	6	7	4	6	6	4	2	7	2	6	6	6	2	3	6	6	4	5	5	3	6	6	4	3	5	2	2	5	2	4	4	6
P09436	P09436	2	2	2	Isoleucine--tRNA ligase, cytoplasmic	ILS1		1	2	2	2	1	0	0	1	0	0	0	1	0	0	0	0	0	0	0	0	0	0	0	0	0	0	0	1	0	0	0	0	1	0	0	1	0	0	1	0	0	0
P09457	P09457	5	5	5	ATP synthase subunit 5, mitochondrial	ATP5		1	5	5	5	0	0	0	0	0	0	1	0	1	1	1	0	0	3	1	0	0	1	0	0	2	1	0	1	1	1	0	1	0	0	0	0	0	0	0	0	0	1
P09620	P09620	1	1	1	Pheromone-processing carboxypeptidase KEX1	KEX1		1	1	1	1	1	1	1	1	1	1	1	1	1	1	1	1	0	0	0	1	1	0	1	0	1	1	1	1	0	1	1	0	1	0	0	1	1	1	1	1	1	1
P09624	P09624	24	24	24	Dihydrolipoyl dehydrogenase, mitochondrial	LPD1		1	24	24	24	17	11	14	6	17	16	16	9	14	16	14	9	10	7	3	16	13	12	15	11	14	15	11	15	8	12	12	11	16	4	10	17	11	14	6	17	16	16
P09733;P09734	P09733	3;1	3;1	3;1	Tubulin alpha-1 chain	TUB1		2	3	3	3	0	0	0	0	0	0	0	0	0	0	0	0	0	0	0	1	0	1	1	0	0	1	1	1	0	2	0	2	1	0	0	0	0	0	0	0	0	0
P09938	P09938	5	5	5	Ribonucleoside-diphosphate reductase small chain 1	RNR2		1	5	5	5	0	0	1	1	1	1	1	1	0	1	1	1	0	2	2	1	0	0	4	0	1	1	0	2	0	1	0	1	2	0	1	0	0	1	1	1	1	1
P0C0T4	P0C0T4	9	1	1	40S ribosomal protein S25-B	RPS25B		1	9	1	1	5	4	4	6	6	6	5	5	6	5	4	3	5	5	6	5	4	7	6	4	6	3	6	3	7	4	6	3	5	1	3	1	0	1	1	1	1	1
Q3E754;P0C0V8	Q3E754;P0C0V8	6;6	6;6	6;6	40S ribosomal protein S21-B;40S ribosomal protein S21-A	RPS21B;RPS21A	;	2	6	6	6	1	1	3	3	3	2	1	2	3	4	2	2	2	2	3	3	4	3	3	1	1	2	2	4	3	3	3	3	2	0	1	1	1	3	3	3	2	1
P0C0X0	P0C0X0	2	2	1	40S ribosomal protein S28-B	RPS28B		1	2	2	1	1	1	1	1	1	1	1	1	1	1	1	1	1	1	2	1	1	1	1	1	1	1	1	1	1	1	1	1	1	1	1	1	1	1	1	1	1	1
P0C2H6;P0C2H7	P0C2H6;P0C2H7	13;10	13;10	13;10	60S ribosomal protein L27-A;60S ribosomal protein L27-B	RPL27A;RPL27B	;	2	13	13	13	9	8	8	7	9	8	9	7	8	9	8	7	5	7	7	7	8	7	8	6	9	7	7	9	7	8	7	8	9	3	5	9	8	8	7	9	8	9
P0C2H8;P0C2H9	P0C2H8;P0C2H9	8;7	8;7	8;7	60S ribosomal protein L31-A;60S ribosomal protein L31-B	RPL31A;RPL31B	;	2	8	8	8	5	3	3	4	5	2	3	5	6	3	2	5	1	3	3	2	2	2	5	2	4	3	4	5	3	5	2	2	3	1	1	5	3	3	4	5	2	3
Q12501;Q12113;Q07791;Q03494;P25384;P0C2J3;Q12491;Q12472;P0CX64;P0CX63;Q99303;Q12439;Q12392;Q12293;Q12260;Q03483;P25383;P0C2J4;P0CX62;P0CX61	Q12501;Q12113;Q07791;Q03494;P25384;P0C2J3;Q12491;Q12472;P0CX64;P0CX63;Q99303;Q12439;Q12392;Q12293;Q12260;Q03483;P25383;P0C2J4;P0CX62;P0CX61	9;9;9;9;9;9;8;8;8;8;7;7;7;7;7;7;7;7;6;6	9;9;9;9;9;9;8;8;8;8;7;7;7;7;7;7;7;7;6;6	8;8;8;8;8;8;7;7;7;7;7;7;7;7;7;7;7;7;6;6	Transposon Ty2-OR2 Gag-Pol polyprotein;Capsid protein;Ty2 protease;Integrase;Reverse transcriptase/ribonuclease H;Transposon Ty2-OR1 Gag-Pol polyprotein;Capsid protein;Ty2 protease;Integrase;Reverse transcriptase/ribonuclease H;Transposon Ty2-DR3 Gag-Pol polyprotein;Capsid protein;Ty2 protease;Integrase;Reverse transcriptase/ribonuclease H;Transposon Ty2-DR2 Gag-Pol polyprotein;Capsid protein;Ty2…	TY2B-OR2;TY2B-OR1;TY2B-DR3;TY2B-DR2;TY2B-C;TY2B-LR1;TY2B-B;TY2B-DR1;TY2B-GR2;TY2B-F;TY2A-DR3;TY2A-OR1;TY2A-DR1;TY2A-OR2;TY2A-B;TY2A-DR2;TY2A-C;TY2A-LR1;TY2A-GR2;TY2A-F	;;;;;;;;;;;;;;;;;;;	20	9	9	8	5	4	7	5	5	5	6	4	6	5	5	3	1	1	0	5	3	5	3	2	3	4	4	3	2	3	4	5	4	0	2	5	4	7	5	5	5	6
P0C2J7;P47024	P0C2J7;P47024	5;5	5;5	3;3	Transposon Ty4-H Gag-Pol polyprotein;Capsid protein;Ty4 protease;Integrase;Reverse transcriptase/ribonuclease H;Transposon Ty4-J Gag-Pol polyprotein;Capsid protein;Ty4 protease;Integrase;Reverse transcriptase/ribonuclease H	TY4B-H;TY4B-J	;	2	5	5	3	2	1	2	2	0	0	2	0	1	1	0	2	1	2	1	2	2	2	2	1	3	1	1	2	1	3	4	2	2	0	1	2	1	2	2	0	0	2
P0CE41	P0CE41	3	3	3	Heme-responsive zinc finger transcription factor HAP1	HAP1		1	3	3	3	2	2	2	2	2	2	2	2	3	2	1	1	2	0	2	3	2	2	1	3	3	3	3	2	2	3	3	3	2	0	3	2	2	2	2	2	2	2
P0CH09;P0CH08	P0CH09;P0CH08	19;19	6;6	6;6	Ubiquitin-60S ribosomal protein L40;Ubiquitin;60S ribosomal protein L40	RPL40B;RPL40A	;	2	19	6	6	11	9	11	13	9	12	11	11	10	11	10	11	5	8	12	7	10	9	14	5	9	8	7	12	5	8	11	8	12	2	5	2	1	2	4	1	2	1
P0CT04	P0CT04	12	12	12	Protease B inhibitor 2	PBI2		1	12	12	12	9	4	10	7	10	9	8	7	7	8	6	7	10	4	7	6	6	7	10	5	4	7	5	7	5	3	4	6	6	1	4	9	4	10	7	10	9	8
P0CX24;P0CX23	P0CX24;P0CX23	14;14	14;14	14;14	60S ribosomal protein L20-B;60S ribosomal protein L20-A	RPL20B;RPL20A	;	2	14	14	14	8	8	8	9	9	8	9	9	7	10	10	7	4	6	10	10	9	8	10	5	9	9	7	9	7	10	8	8	8	2	6	8	8	8	9	9	8	9
P0CX26;P0CX25	P0CX26;P0CX25	2;2	2;2	2;2	60S ribosomal protein L43-B;60S ribosomal protein L43-A	RPL43B;RPL43A	;	2	2	2	2	1	0	1	0	2	2	2	2	2	2	2	2	2	1	1	2	2	2	2	2	2	2	2	2	2	2	2	2	2	2	2	1	0	1	0	2	2	2
P0CX28;P0CX27	P0CX28;P0CX27	9;9	9;9	9;9	60S ribosomal protein L42-B;60S ribosomal protein L42-A	RPL42B;RPL42A	;	2	9	9	9	5	3	5	6	5	7	4	3	5	6	7	4	2	1	5	5	6	4	3	4	7	3	6	3	4	5	5	5	5	1	3	5	3	5	6	5	7	4
P0CX30;P0CX29	P0CX30;P0CX29	9;9	9;9	9;9	40S ribosomal protein S23-B;40S ribosomal protein S23-A	RPS23B;RPS23A	;	2	9	9	9	0	0	1	3	1	1	1	3	1	2	1	1	0	7	4	1	1	1	3	1	1	1	1	2	2	2	1	1	1	0	0	0	0	1	3	1	1	1
P0CX32;P0CX31	P0CX32;P0CX31	7;7	7;7	7;7	40S ribosomal protein S24-B;40S ribosomal protein S24-A	RPS24B;RPS24A	;	2	7	7	7	4	3	3	3	4	3	1	3	3	2	3	0	0	4	2	3	3	1	5	2	2	3	3	0	1	4	4	1	1	0	1	4	3	3	3	4	3	1
P0CX34;P0CX33	P0CX34;P0CX33	5;5	5;5	5;5	40S ribosomal protein S30-B;40S ribosomal protein S30-A	RPS30B;RPS30A	;	2	5	5	5	0	0	1	3	2	1	1	3	1	0	1	3	1	2	2	2	1	1	3	3	2	1	2	2	1	1	1	1	3	1	1	0	0	1	3	2	1	1
P0CX36;P0CX35	P0CX36;P0CX35	18;18	18;18	18;18	40S ribosomal protein S4-B;40S ribosomal protein S4-A	RPS4B;RPS4A	;	2	18	18	18	10	9	13	8	10	10	11	10	10	9	11	7	7	8	9	10	10	10	13	5	9	10	9	12	7	9	10	8	8	1	5	10	9	13	8	10	10	11
P0CX38;P0CX37	P0CX38;P0CX37	6;6	6;6	6;6	40S ribosomal protein S6-B;40S ribosomal protein S6-A	RPS6B;RPS6A	;	2	6	6	6	0	0	0	0	2	2	2	1	1	2	2	1	0	4	1	0	0	2	0	0	1	1	0	0	2	0	2	2	0	0	1	0	0	0	0	2	2	2
P0CX40;P0CX39	P0CX40;P0CX39	16;16	16;16	16;16	40S ribosomal protein S8-B;40S ribosomal protein S8-A	RPS8B;RPS8A	;	2	16	16	16	5	8	6	8	7	8	9	8	6	9	9	6	3	6	6	6	8	7	7	4	7	6	4	7	5	7	6	8	7	2	4	5	8	6	8	7	8	9
P0CX42;P0CX41	P0CX42;P0CX41	4;4	4;4	4;4	60S ribosomal protein L23-B;60S ribosomal protein L23-A	RPL23B;RPL23A	;	2	4	4	4	2	2	1	2	2	2	1	2	2	1	1	1	2	1	1	2	2	2	3	1	3	1	2	2	1	2	1	1	3	0	1	2	2	1	2	2	2	1
P0CX44;P0CX43	P0CX44;P0CX43	7;7	7;7	7;7	60S ribosomal protein L1-B;60S ribosomal protein L1-A	RPL1B;RPL1A	;	2	7	7	7	3	1	2	2	2	0	0	3	3	1	2	3	2	5	2	0	0	1	5	0	3	1	1	3	2	2	1	0	0	0	2	3	1	2	2	2	0	0
P0CX46;P0CX45	P0CX46;P0CX45	24;24	24;24	24;24	60S ribosomal protein L2-B;60S ribosomal protein L2-A	RPL2B;RPL2A	;	2	24	24	24	16	17	20	17	15	17	20	18	16	17	18	12	11	4	6	13	16	16	17	10	15	12	14	17	9	14	15	14	18	10	9	16	17	20	17	15	17	20
434;330435;330436;330437;330438;330439;330440;330441;330442;330443;330444;330445;330446;330447;330448;330449;330450;330451;330452;330453;330454;330455;330456;330457;330458;330459;330460;330461;330462;330463;330464;330465;330466;330467;330468;330469;330470;330471;330472;330473;330474;330475;330476;330477;330478;330479;330480;330481;330482;330483;330484;330485;330486;330487;330488;330489;330490;330…	4718;24141;24800;48187;73041;94511;95590;97414;97610;150549;150551;171076;211335;211626;246973;254770;330661;332746;333247;364716;383956;397929;398306;398734	498;499	92		92;93	204
P0CX48;P0CX47	P0CX48;P0CX47	17;17	17;17	17;17	40S ribosomal protein S11-B;40S ribosomal protein S11-A	RPS11B;RPS11A	;	2	17	17	17	5	6	7	13	9	9	10	11	9	9	10	9	6	11	13	8	9	8	11	9	9	9	8	12	8	8	9	6	7	2	8	5	6	7	13	9	9	10
P0CX50;P0CX49	P0CX50;P0CX49	13;13	13;13	13;13	60S ribosomal protein L18-B;60S ribosomal protein L18-A	RPL18B;RPL18A	;	2	13	13	13	4	3	5	6	9	4	8	5	7	7	8	4	4	6	5	6	5	9	6	2	6	6	7	6	4	5	6	7	6	1	4	4	3	5	6	9	4	8
P0CX52;P0CX51	P0CX52;P0CX51	11;11	11;11	11;11	40S ribosomal protein S16-B;40S ribosomal protein S16-A	RPS16B;RPS16A	;	2	11	11	11	4	2	4	7	2	4	2	5	5	3	4	6	3	4	5	4	2	2	6	1	3	3	3	5	4	4	3	5	6	0	2	4	2	4	7	2	4	2
P0CX54;P0CX53	P0CX54;P0CX53	9;9	9;9	9;9	60S ribosomal protein L12-B;60S ribosomal protein L12-A	RPL12B;RPL12A	;	2	9	9	9	4	1	4	3	4	2	2	3	5	1	3	2	2	3	5	2	3	4	4	3	2	1	4	5	3	3	3	3	2	1	3	4	1	4	3	4	2	2
P0CX56;P0CX55	P0CX56;P0CX55	14;14	14;14	14;14	40S ribosomal protein S18-B;40S ribosomal protein S18-A	RPS18B;RPS18A	;	2	14	14	14	4	6	3	4	6	6	7	6	8	8	7	2	4	10	3	4	8	7	6	3	7	6	4	6	5	3	3	5	4	0	2	4	6	3	4	6	6	7
P0CX81;P0CX80	P0CX81;P0CX80	4;4	4;4	4;4	Copper metallothionein 1-2;Copper metallothionein 1-1	CUP1-2;CUP1-1	;	2	4	4	4	0	0	0	0	0	1	0	1	2	1	2	2	0	0	1	2	0	0	3	1	1	2	2	3	0	2	2	1	3	0	1	0	0	0	0	0	1	0
P0CX83;P0CX82	P0CX83;P0CX82	9;9	9;9	9;9	60S ribosomal protein L19-B;60S ribosomal protein L19-A	RPL19B;RPL19A	;	2	9	9	9	3	3	3	3	3	3	1	3	3	3	3	3	2	2	4	3	4	3	5	2	3	2	1	3	3	4	2	2	3	0	2	3	3	3	3	3	3	1
P0CX85;P0CX84	P0CX85;P0CX84	13;13	13;13	13;13	60S ribosomal protein L35-B;60S ribosomal protein L35-A	RPL35B;RPL35A	;	2	13	13	13	7	5	4	8	7	4	6	7	5	7	7	8	4	6	9	6	5	5	10	4	4	2	5	8	5	6	5	5	4	3	3	7	5	4	8	7	4	6
P0CY07;P0CY06	P0CY07;P0CY06	1;1	1;1	1;1	Silenced mating-type protein ALPHA1;Mating-type protein ALPHA1	HMLALPHA1;MATALPHA1	;	2	1	1	1	0	0	0	0	0	1	0	1	0	0	0	1	1	0	0	0	0	1	1	1	0	1	0	1	0	0	0	1	0	0	0	0	0	0	0	0	1	0
P10080	P10080	5	5	5	Single-stranded nucleic acid-binding protein	SBP1		1	5	5	5	0	0	0	2	1	0	0	1	0	0	1	1	1	2	2	1	0	0	2	1	2	1	1	1	0	1	2	1	2	0	0	0	0	0	2	1	0	0
P10081	P10081	7	7	7	ATP-dependent RNA helicase eIF4A	TIF1		1	7	7	7	0	0	0	1	1	1	1	3	1	1	3	3	0	2	2	1	1	0	3	0	1	1	1	3	1	1	1	1	1	0	2	0	0	0	1	1	1	1
P10363	P10363	4	4	4	DNA primase small subunit	PRI1		1	4	4	4	2	1	1	2	3	2	2	2	3	2	2	1	1	2	1	2	1	0	3	0	2	0	0	1	0	2	0	0	1	0	0	2	1	1	2	3	2	2
P10591;P09435	P10591	14;3	14;3	2;0	Heat shock protein SSA1	SSA1		2	14	14	2	2	3	2	4	3	5	5	2	3	3	4	2	0	6	4	1	5	4	5	1	6	4	2	5	2	4	7	5	3	0	2	2	3	2	4	3	5	5
P10592	P10592	14	2	2	Heat shock protein SSA2	SSA2		1	14	2	2	1	2	1	3	3	4	5	1	2	2	4	3	0	6	3	0	4	4	3	1	6	4	2	3	2	3	5	4	2	0	2	0	1	0	1	0	0	0
P10622	P10622	2	2	2	60S acidic ribosomal protein P1-beta	RPP1B		1	2	2	2	2	2	2	2	2	2	2	0	1	1	2	1	1	1	2	0	0	0	2	1	0	1	0	1	1	0	0	0	1	0	0	2	2	2	2	2	2	2
P10659	P10659	3	3	1	S-adenosylmethionine synthase 1	SAM1		1	3	3	1	0	0	0	0	1	1	2	0	1	2	2	0	0	1	0	0	2	2	0	2	2	2	1	0	2	0	1	2	0	0	2	0	0	0	0	1	1	2
P10664;P49626	P10664;P49626	9;8	9;8	9;8	60S ribosomal protein L4-A;60S ribosomal protein L4-B	RPL4A;RPL4B	;	2	9	9	9	4	2	4	3	3	4	5	4	5	4	5	2	1	6	4	3	5	3	5	2	4	4	2	2	3	4	4	4	2	2	3	4	2	4	3	3	4	5
P10869	P10869	1	1	1	Aspartokinase	HOM3		1	1	1	1	0	0	0	0	0	0	0	0	0	0	0	0	0	1	0	0	0	0	0	0	0	0	0	0	0	0	0	0	0	0	0	0	0	0	0	0	0	0
P10962	P10962	1	1	1	Protein MAK16	MAK16		1	1	1	1	1	0	0	0	0	0	0	0	0	0	0	0	0	1	0	0	0	0	0	0	0	0	0	0	0	0	0	0	0	0	0	1	0	0	0	0	0	0
P10963;REV__Q12532	P10963	41;1	41;1	41;1	Phosphoenolpyruvate carboxykinase [ATP]	PCK1		2	41	41	41	17	6	17	21	15	19	20	19	15	17	11	16	11	20	11	12	16	9	24	8	8	14	13	20	7	9	13	9	24	5	6	17	6	17	21	15	19	20
P10964	P10964	2	2	2	DNA-directed RNA polymerase I subunit RPA190	RPA190		1	2	2	2	0	0	0	0	1	0	0	0	1	0	0	1	0	1	0	0	0	0	0	0	0	0	0	0	0	1	0	0	0	0	0	0	0	0	0	1	0	0
P19146;P11076	P19146;P11076	1;1	1;1	1;1	ADP-ribosylation factor 2;ADP-ribosylation factor 1	ARF2;ARF1	;	2	1	1	1	0	0	0	1	0	1	0	1	1	0	1	1	0	0	0	0	0	0	1	0	0	1	0	1	0	0	0	0	1	0	0	0	0	0	1	0	1	0
P11154;P32327	P11154	10;4	10;4	10;4	Pyruvate carboxylase 1	PYC1		2	10	10	10	2	2	4	2	3	4	3	5	3	3	1	1	1	0	0	6	3	1	3	4	3	4	6	6	2	4	6	4	5	0	3	2	2	4	2	3	4	3
P11353	P11353	5	5	5	Oxygen-dependent coproporphyrinogen-III oxidase	HEM13		1	5	5	5	2	2	3	3	5	4	5	3	3	4	4	1	1	1	0	4	4	3	1	0	5	4	4	2	0	3	4	2	4	0	0	2	2	3	3	5	4	5
P11412	P11412	2	2	2	Glucose-6-phosphate 1-dehydrogenase	ZWF1		1	2	2	2	1	1	1	1	1	1	1	1	1	1	1	1	1	1	1	0	1	0	1	0	0	1	0	1	1	0	1	0	0	0	1	1	1	1	1	1	1	1
P11433	P11433	2	2	2	Cell division control protein 24	CDC24		1	2	2	2	0	1	1	1	1	1	1	1	1	1	1	0	2	1	0	1	1	1	1	1	1	1	0	1	1	1	1	1	1	0	1	0	1	1	1	1	1	1
P40150;P11484	P40150;P11484	13;13	13;13	13;13	Heat shock protein SSB2;Heat shock protein SSB1	SSB2;SSB1	;	2	13	13	13	1	1	2	1	0	1	3	1	1	1	2	1	1	8	2	2	1	1	3	0	0	1	0	2	1	0	1	2	0	0	0	1	1	2	1	0	1	3
P11491	P11491	7	7	7	Repressible alkaline phosphatase;Soluble alkaline phosphatase	PHO8		1	7	7	7	2	0	1	2	5	3	2	2	4	2	1	1	0	0	1	2	3	1	3	0	3	3	1	4	1	4	1	2	5	0	1	2	0	1	2	5	3	2
P11632	P11632	1	1	1	Non-histone chromosomal protein 6A	NHP6A		1	1	1	1	0	0	0	0	0	0	0	0	0	0	0	0	0	0	0	0	0	0	1	0	0	0	0	0	0	0	0	0	1	0	0	0	0	0	0	0	0	0
P11745	P11745	1	1	1	Ran GTPase-activating protein 1	RNA1		1	1	1	1	0	0	0	0	1	1	1	0	1	1	1	0	0	1	0	0	1	1	0	1	1	1	1	1	1	0	1	1	0	0	1	0	0	0	0	1	1	1
P11792	P11792	18	18	18	Serine/threonine-protein kinase SCH9	SCH9		1	18	18	18	6	9	9	11	4	5	5	4	4	5	5	3	4	5	6	3	4	3	4	1	3	3	4	8	1	2	4	2	9	0	1	6	9	9	11	4	5	5
P11938	P11938	10	10	10	DNA-binding protein RAP1	RAP1		1	10	10	10	1	2	2	1	2	2	3	2	1	1	1	1	0	4	4	5	1	2	2	0	3	3	2	1	1	3	2	5	2	0	0	1	2	2	1	2	2	3
P11978	P11978	41	41	41	Regulatory protein SIR4	SIR4		1	41	41	41	5	9	17	7	11	13	10	9	14	11	8	7	7	22	19	14	7	4	4	6	14	10	13	6	5	18	17	17	6	1	6	5	9	17	7	11	13	10
P11986	P11986	1	1	1	Inositol-3-phosphate synthase	INO1		1	1	1	1	0	0	0	0	1	1	1	0	1	1	1	0	0	0	0	1	1	1	0	0	1	1	1	0	0	1	1	1	0	0	0	0	0	0	0	1	1	1
P12383	P12383	4	4	4	Transcription factor PDR1	PDR1		1	4	4	4	3	3	2	1	2	1	2	2	2	2	2	3	1	1	2	3	2	1	3	1	3	2	1	1	0	2	2	2	1	0	0	3	3	2	1	2	1	2
P12612	P12612	1	1	1	T-complex protein 1 subunit alpha	TCP1		1	1	1	1	0	0	0	0	0	0	0	0	0	0	0	0	0	1	0	0	0	0	0	0	0	0	0	0	0	0	0	0	0	0	0	0	0	0	0	0	0	0
P12709	P12709	6	6	6	Glucose-6-phosphate isomerase	PGI1		1	6	6	6	2	2	3	3	2	2	2	3	2	2	2	2	1	3	3	2	1	2	3	1	1	1	2	4	1	2	2	1	2	1	1	2	2	3	3	2	2	2
P12887	P12887	1	1	1	Uracil-DNA glycosylase	UNG1		1	1	1	1	0	0	0	0	0	0	0	0	0	0	0	0	0	1	0	0	0	0	0	0	0	0	0	0	0	0	0	0	0	0	0	0	0	0	0	0	0	0
P12954	P12954	7	7	7	ATP-dependent DNA helicase SRS2	SRS2		1	7	7	7	0	0	0	0	4	4	3	1	4	4	4	2	4	5	5	5	4	4	4	3	4	4	4	3	2	4	5	4	2	1	2	0	0	0	0	4	4	3
P12962	P12962	9	9	9	Cap-associated protein CAF20	CAF20		1	9	9	9	5	7	6	9	4	6	6	8	6	6	4	7	2	3	3	4	3	4	7	1	5	5	2	8	2	3	3	3	7	2	1	5	7	6	9	4	6	6
P13099	P13099	2	2	2	DNA topoisomerase 3	TOP3		1	2	2	2	0	0	0	0	0	0	0	0	0	0	0	1	1	0	1	2	0	0	2	0	0	1	1	2	0	2	2	1	2	1	1	0	0	0	0	0	0	0
P13186	P13186	5	5	2	Serine/threonine-protein kinase KIN2	KIN2		1	5	5	2	0	0	0	1	1	1	0	1	1	1	0	1	1	1	0	2	1	0	1	1	1	1	0	2	2	2	1	1	2	0	0	0	0	0	1	1	1	0
P13382	P13382	2	2	2	DNA polymerase alpha catalytic subunit A	POL1		1	2	2	2	0	0	0	0	2	1	0	2	0	0	0	0	1	0	2	0	0	0	2	0	0	0	0	0	0	0	0	0	0	0	0	0	0	0	0	2	1	0
P13393	P13393	12	12	12	TATA-box-binding protein	SPT15		1	12	12	12	7	8	10	9	7	6	7	8	8	7	5	7	2	3	6	8	8	4	8	0	3	6	9	7	0	8	3	5	5	0	0	7	8	10	9	7	6	7
P13574	P13574	1	1	1	Protein STE12	STE12		1	1	1	1	1	1	1	1	0	0	0	0	0	0	0	0	0	0	1	0	0	0	0	0	0	0	0	0	0	0	0	0	0	0	0	1	1	1	1	0	0	0
P13663	P13663	1	1	1	Aspartate-semialdehyde dehydrogenase	HOM2		1	1	1	1	0	0	0	0	0	0	1	0	1	1	1	0	0	0	0	0	1	1	0	0	1	0	0	0	0	0	0	1	0	0	0	0	0	0	0	0	0	1
P13711	P13711	2	2	2	Acyl-coenzyme A oxidase	POX1		1	2	2	2	0	0	0	1	0	0	0	1	0	1	0	0	0	0	0	0	0	0	1	0	0	1	0	1	1	0	2	0	1	0	2	0	0	0	1	0	0	0
P13902	P13902	3	3	3	Protein INO4	INO4		1	3	3	3	1	1	0	0	0	0	0	0	0	0	1	0	0	1	2	0	1	0	0	0	0	1	0	0	0	1	0	0	1	0	0	1	1	0	0	0	0	0
P14020	P14020	1	1	1	Dolichol-phosphate mannosyltransferase	DPM1		1	1	1	1	0	0	0	0	0	0	0	0	0	0	0	0	1	0	0	0	0	0	0	0	0	0	0	0	0	0	0	0	0	0	0	0	0	0	0	0	0	0
P14064	P14064	1	1	1	Transcriptional activator HAP4	HAP4		1	1	1	1	0	0	0	0	0	0	0	0	0	0	0	0	0	1	0	0	0	0	0	0	0	0	0	0	0	0	0	0	0	0	0	0	0	0	0	0	0	0
P14120	P14120	9	9	9	60S ribosomal protein L30	RPL30		1	9	9	9	6	5	3	4	3	3	2	6	5	2	4	5	3	3	8	5	3	3	5	2	5	2	3	3	5	4	2	2	4	2	2	6	5	3	4	3	3	2
P14126	P14126	42	42	42	60S ribosomal protein L3	RPL3		1	42	42	42	27	26	30	25	19	22	25	22	14	18	15	19	23	18	24	17	21	15	22	10	14	16	16	20	13	17	13	12	26	14	11	27	26	30	25	19	22	25
75;386576;386577;386578;386579;386580;386581;386582;386583;386584;386585;386586;386587;386588;386589;386590;386591;386592;386593;386594;386595;386596;386597;386598;386599;386600;386601;386602;386603;386604;386605;386606;386607;386608;386609;386610;386611;386612;386613;386614;386615;386616;386617;386618;386619;386620;386621;386622;386623;386624;386625;386626;386627;386628;386629;386630;386631;3866…	5667;5678;7217;15680;15686;31352;60180;74844;74886;74887;81450;91230;91239;99790;100145;156871;170856;171054;183159;187052;222705;227288;251471;263763;291411;298030;323001;323471;323715;344004;344015;344030;344043;355424;359025;381399;385898;385900;386484;386497;389244;391184	654;655;656;657;658;659	103;104;105;106		66;357;367;376;384;385	53;214;308;380
P14164	P14164	40	40	40	ARS-binding factor 1	ABF1		1	40	40	40	21	21	28	26	20	16	21	20	21	23	24	19	13	9	21	21	21	18	25	12	23	21	20	25	11	22	22	25	24	10	13	21	21	28	26	20	16	21
P14291	P14291	35	35	35	Protein RED1	RED1		1	35	35	35	0	0	0	0	14	21	14	6	16	18	11	16	19	17	15	31	18	10	15	17	13	22	20	12	9	19	19	23	10	3	7	0	0	0	0	14	21	14
P14306	P14306	1	1	1	Carboxypeptidase Y inhibitor	TFS1		1	1	1	1	0	0	0	0	0	0	0	0	0	0	0	0	0	1	0	0	0	0	0	0	0	0	0	0	1	0	0	0	0	0	0	0	0	0	0	0	0	0
P14540	P14540	34	34	34	Fructose-bisphosphate aldolase	FBA1		1	34	34	34	15	12	16	14	21	17	16	21	20	18	16	12	14	17	8	15	18	12	20	8	11	14	15	16	8	13	12	11	18	6	8	15	12	16	14	21	17	16
P14742	P14742	9	9	9	Glutamine--fructose-6-phosphate aminotransferase [isomerizing]	GFA1		1	9	9	9	2	3	2	3	3	3	4	4	1	2	1	0	3	2	2	4	2	1	3	1	2	3	4	6	0	4	4	4	3	2	1	2	3	2	3	3	3	4
P14832	P14832	14	14	12	Peptidyl-prolyl cis-trans isomerase	CPR1		1	14	14	12	6	6	8	6	8	4	6	9	7	8	8	8	4	7	8	6	8	6	9	3	6	7	7	10	7	5	7	6	7	4	6	6	6	8	6	8	4	6
P14904	P14904	3	3	3	Vacuolar aminopeptidase 1	APE1		1	3	3	3	0	0	0	1	0	0	0	1	0	0	0	0	0	2	0	0	0	0	1	0	0	0	0	1	1	0	0	0	1	0	0	0	0	0	1	0	0	0
P14922	P14922	3	3	3	General transcriptional corepressor CYC8	CYC8		1	3	3	3	0	1	2	2	1	0	1	2	2	0	1	1	0	2	2	1	1	0	3	0	2	1	0	1	0	1	1	0	1	0	0	0	1	2	2	1	0	1
P15019	P15019	2	2	2	Transaldolase	TAL1		1	2	2	2	0	0	0	0	0	0	0	0	0	0	0	1	0	1	0	0	0	0	2	0	0	0	0	1	0	0	0	0	1	0	0	0	0	0	0	0	0	0
P15108	P15108	14	14	5	ATP-dependent molecular chaperone HSC82	HSC82		1	14	14	5	3	2	7	5	3	3	3	5	6	5	3	5	2	8	6	5	5	4	6	4	4	5	6	7	3	6	7	6	6	0	2	3	2	7	5	3	3	3
P15180	P15180	3	3	3	Lysine--tRNA ligase, cytoplasmic	KRS1		1	3	3	3	0	1	1	2	1	0	1	3	1	2	1	2	0	0	1	1	1	0	2	0	1	0	0	2	0	0	1	0	2	0	0	0	1	1	2	1	0	1
P15202	P15202	8	8	8	Peroxisomal catalase A	CTA1		1	8	8	8	2	2	3	3	4	4	4	6	4	3	2	5	3	0	3	5	5	3	7	2	5	5	5	6	2	5	5	5	5	1	2	2	2	3	3	4	4	4
P15274	P15274	30	30	30	AMP deaminase	AMD1		1	30	30	30	20	22	18	23	9	11	7	12	12	12	7	13	6	8	3	10	7	4	14	4	7	14	9	17	3	10	13	7	15	2	5	20	22	18	23	9	11	7
P15424	P15424	1	1	1	ATP-dependent RNA helicase MSS116, mitochondrial	MSS116		1	1	1	1	0	0	0	0	0	0	0	0	0	0	0	0	0	1	0	0	0	0	0	0	0	0	0	0	0	0	0	0	0	0	0	0	0	0	0	0	0	0
P15436	P15436	2	2	1	DNA polymerase delta catalytic subunit	POL3		1	2	2	1	1	1	0	1	1	0	1	0	1	1	0	0	0	0	0	0	1	1	1	0	1	1	0	1	0	0	0	1	0	0	0	1	1	0	1	1	0	1
P15454	P15454	1	1	1	Guanylate kinase	GUK1		1	1	1	1	0	0	0	0	0	0	0	0	0	0	0	0	0	0	0	0	0	0	1	0	0	0	0	0	0	0	0	0	0	0	0	0	0	0	0	0	0	0
P15496	P15496	1	1	1	Isopentenyl-diphosphate Delta-isomerase	IDI1		1	1	1	1	0	0	0	0	0	0	0	0	0	0	0	0	0	0	0	0	0	0	0	0	1	0	0	0	1	0	0	0	0	0	1	0	0	0	0	0	0	0
P15624	P15624	1	1	1	Phenylalanine--tRNA ligase beta subunit	FRS1		1	1	1	1	0	0	0	0	0	0	0	0	1	1	0	1	0	0	0	1	1	1	1	0	1	0	1	1	0	1	1	0	0	0	1	0	0	0	0	0	0	0
P15703	P15703	3	3	3	Glucan 1,3-beta-glucosidase	BGL2		1	3	3	3	1	0	0	1	1	2	2	2	2	3	3	0	0	0	1	2	2	2	1	0	1	3	1	1	0	1	2	3	0	0	0	1	0	0	1	1	2	2
P15705	P15705	1	1	1	Heat shock protein STI1	STI1		1	1	1	1	0	0	0	0	0	0	1	0	0	1	1	0	0	1	0	0	0	1	0	0	1	1	0	0	1	0	1	1	0	0	0	0	0	0	0	0	0	1
P15731	P15731	2	1	1	Ubiquitin-conjugating enzyme E2 4	UBC4		1	2	1	1	1	1	1	1	0	0	0	1	0	1	0	1	0	0	1	0	0	0	2	0	0	0	0	1	0	0	0	0	1	0	0	0	1	0	0	0	0	0
P15732	P15732	2	2	1	Ubiquitin-conjugating enzyme E2-16 kDa	UBC5		1	2	2	1	1	0	1	1	0	0	0	1	0	2	0	1	0	0	1	0	0	1	1	0	1	1	0	1	1	0	0	1	1	0	0	1	0	1	1	0	0	0
P15807	P15807	1	1	1	Siroheme biosynthesis protein MET8;Precorrin-2 dehydrogenase;Sirohydrochlorin ferrochelatase	MET8		1	1	1	1	0	0	0	0	0	0	0	0	0	0	0	0	0	0	0	1	1	0	0	1	1	0	1	1	0	1	1	0	0	0	0	0	0	0	0	0	0	0
P15873	P15873	16	16	16	Proliferating cell nuclear antigen	POL30		1	16	16	16	5	6	8	6	9	11	10	9	9	13	9	8	4	4	7	11	9	11	9	5	8	9	8	8	4	7	9	7	6	3	3	5	6	8	6	9	11	10
78;166979;166980;166981;166982;166983;166984;166985;166986;166987;166988;166989;166990;166991;166992;166993;166994;166995;166996;166997;166998;166999;167000;167001;167002;167003;167004;167005;167006;167007;167008;167009;167010;167011;167012;167013;167014;167015;167016;167017;167018;167019;167020;167021;167022;167023;167024;167025;167026;167027;167028;167029;167030;167031;167032;167033;167034;1670…	31233;65633;65635;66270;95360;155451;162346;163319;165312;204335;204799;204991;209394;289641;334632;400734	745;746;747;748	116;117	198;199	127;164;168;183	119;161	163;166
P15891	P15891	3	3	3	Actin-binding protein	ABP1		1	3	3	3	0	0	1	1	0	0	0	0	0	0	0	1	0	2	1	1	0	0	2	0	1	0	0	1	0	1	0	1	0	0	0	0	0	1	1	0	0	0
P16370	P16370	1	1	1	DNA-directed RNA polymerase II subunit RPB3	RPB3		1	1	1	1	0	0	0	0	0	0	0	0	0	0	0	0	0	0	1	0	0	0	0	0	0	0	0	0	0	0	0	0	0	0	0	0	0	0	0	0	0	0
P16387	P16387	2	2	2	Pyruvate dehydrogenase E1 component subunit alpha, mitochondrial	PDA1		1	2	2	2	0	0	0	0	0	0	1	0	0	0	0	0	0	2	0	0	0	0	0	0	0	0	0	0	0	0	0	0	0	0	0	0	0	0	0	0	0	1
P16467	P16467	3	2	2	Pyruvate decarboxylase isozyme 2	PDC5		1	3	2	2	0	0	0	1	1	0	0	1	1	0	1	1	0	1	1	0	0	1	1	0	0	0	0	1	0	0	0	0	1	0	0	0	0	0	1	1	0	0
P16521	P16521	2	2	2	Elongation factor 3A	YEF3		1	2	2	2	0	0	0	0	0	0	0	0	0	0	0	0	0	2	0	0	0	0	0	0	0	0	0	0	0	0	0	0	0	0	0	0	0	0	0	0	0	0
P16649	P16649	11	11	11	General transcriptional corepressor TUP1	TUP1		1	11	11	11	6	7	7	5	7	4	5	2	6	3	5	3	3	4	6	3	6	5	9	2	6	1	3	4	0	6	5	4	5	0	1	6	7	7	5	7	4	5
P16861	P16861	1	1	1	ATP-dependent 6-phosphofructokinase subunit alpha	PFK1		1	1	1	1	0	0	0	0	1	1	1	0	1	1	0	0	0	1	0	0	1	0	0	0	1	1	1	0	1	1	1	1	0	0	1	0	0	0	0	1	1	1
P16862	P16862	1	1	1	ATP-dependent 6-phosphofructokinase subunit beta	PFK2		1	1	1	1	0	0	0	1	0	0	0	1	0	0	0	1	0	0	0	0	0	0	1	0	0	0	0	1	0	0	0	0	0	0	0	0	0	0	1	0	0	0
P16965	P16965	5	5	5	ATPase-stabilizing factor 15 kDa protein	STF2		1	5	5	5	3	2	3	2	2	3	2	2	3	1	2	2	1	0	4	3	2	2	2	2	2	2	1	1	1	1	1	1	1	0	0	3	2	3	2	2	3	2
P17076;P29453	P17076;P29453	16;14	16;14	16;14	60S ribosomal protein L8-A;60S ribosomal protein L8-B	RPL8A;RPL8B	;	2	16	16	16	5	5	6	6	6	6	4	6	6	7	5	3	5	7	9	4	4	4	7	3	5	5	3	5	5	6	4	3	6	2	2	5	5	6	6	6	6	4
P17106	P17106	7	7	7	Centromere-binding protein 1	CBF1		1	7	7	7	3	3	5	4	3	2	4	3	3	4	3	3	1	3	5	2	3	2	3	1	2	3	1	3	0	1	2	3	2	0	1	3	3	5	4	3	2	4
P17157	P17157	7	7	7	Cyclin-dependent protein kinase PHO85	PHO85		1	7	7	7	3	3	4	0	4	3	3	2	2	2	2	4	2	2	1	4	3	2	4	2	3	1	3	6	2	4	2	1	4	2	2	3	3	4	0	4	3	3
P17255	P17255	1	1	1	V-type proton ATPase catalytic subunit A;Endonuclease PI-SceI	VMA1		1	1	1	1	0	0	0	0	0	0	0	0	0	0	0	0	0	0	1	0	0	0	0	0	0	1	0	0	1	0	1	1	0	0	1	0	0	0	0	0	0	0
P17505	P17505	4	4	4	Malate dehydrogenase, mitochondrial	MDH1		1	4	4	4	1	0	1	1	1	1	2	1	3	2	2	1	0	1	1	1	1	2	0	1	2	1	2	1	1	0	0	2	1	0	1	1	0	1	1	1	1	2
P17536	P17536	2	2	2	Tropomyosin-1	TPM1		1	2	2	2	1	1	1	2	2	1	2	1	1	1	2	2	1	1	1	2	1	1	2	0	0	1	1	1	1	2	2	1	2	0	2	1	1	1	2	2	1	2
P17709	P17709	7	7	7	Glucokinase-1	GLK1		1	7	7	7	1	0	1	2	3	2	3	3	3	2	2	1	2	2	0	2	3	2	3	1	3	4	3	2	3	1	3	2	2	1	2	1	0	1	2	3	2	3
P17891	P17891	6	6	6	Clathrin light chain	CLC1		1	6	6	6	1	0	1	1	1	0	1	2	2	0	1	1	0	0	2	0	0	1	5	0	2	1	1	1	0	2	0	1	0	0	0	1	0	1	1	1	0	1
P17967	P17967	3	3	3	Protein disulfide-isomerase	PDI1		1	3	3	3	0	0	0	0	0	0	1	0	1	0	1	0	0	1	1	0	0	1	0	1	1	1	1	0	1	1	1	1	0	0	0	0	0	0	0	0	0	1
P18239;P18238	P18239	16;1	16;1	16;1	ADP,ATP carrier protein 2	PET9		2	16	16	16	6	8	8	6	9	10	9	5	9	7	7	3	5	10	3	8	9	6	7	5	7	6	7	4	7	7	7	5	4	3	3	6	8	8	6	9	10	9
P18412	P18412	14	14	14	Ty transcription activator TEC1	TEC1		1	14	14	14	13	12	12	8	3	2	1	3	4	4	1	1	0	1	6	1	1	1	2	0	1	1	1	1	0	1	0	1	1	0	0	13	12	12	8	3	2	1
P18544	P18544	2	2	2	Acetylornithine aminotransferase, mitochondrial	ARG8		1	2	2	2	0	0	0	0	1	1	1	0	1	1	1	0	0	1	1	0	1	1	0	0	0	1	0	0	0	0	0	0	0	0	0	0	0	0	0	1	1	1
P18562	P18562	2	2	2	Uracil phosphoribosyltransferase	FUR1		1	2	2	2	0	0	0	0	0	0	0	0	0	0	0	0	0	2	0	0	0	0	0	0	0	0	0	0	0	0	0	0	0	0	0	0	0	0	0	0	0	0
P18961;P12688	P18961	23;2	23;2	23;2	Serine/threonine-protein kinase YPK2/YKR2	YPK2		2	23	23	23	11	14	17	17	8	10	11	6	6	8	9	8	6	8	5	6	8	9	8	5	5	6	8	7	4	5	11	9	4	0	6	11	14	17	17	8	10	11
P19097	P19097	6	6	6	Fatty acid synthase subunit alpha;Acyl carrier;3-oxoacyl-[acyl-carrier-protein] reductase;3-oxoacyl-[acyl-carrier-protein] synthase	FAS2		1	6	6	6	0	1	0	2	2	1	1	3	1	1	2	1	0	3	1	2	2	1	1	0	2	1	1	2	1	1	2	0	3	0	1	0	1	0	2	2	1	1
P19263	P19263	1	1	1	Mediator of RNA polymerase II transcription subunit 14	RGR1		1	1	1	1	1	1	1	1	0	0	0	0	1	0	0	1	1	0	1	0	0	0	1	0	0	0	0	0	0	1	0	0	1	0	0	1	1	1	1	0	0	0
P19414	P19414	4	4	4	Aconitate hydratase, mitochondrial	ACO1		1	4	4	4	0	0	0	0	2	1	2	1	2	3	1	0	0	1	0	0	1	1	0	0	2	2	1	1	0	0	1	1	0	0	0	0	0	0	0	2	1	2
P19658	P19658	2	2	2	Exocyst complex component EXO70	EXO70		1	2	2	2	0	0	0	0	0	0	0	0	0	0	0	0	0	1	0	0	0	0	1	0	0	0	0	1	0	0	0	0	0	0	0	0	0	0	0	0	0	0
P19659	P19659	3	3	3	Mediator of RNA polymerase II transcription subunit 15	GAL11		1	3	3	3	2	2	1	1	1	1	1	1	1	1	1	0	2	1	2	0	1	1	2	0	1	1	1	0	0	1	1	1	2	0	0	2	2	1	1	1	1	1
P19812	P19812	1	1	1	E3 ubiquitin-protein ligase UBR1	UBR1		1	1	1	1	0	0	0	0	0	1	0	0	0	1	0	0	0	0	0	0	0	1	0	0	0	0	0	0	0	0	1	0	0	0	0	0	0	0	0	0	1	0
P20050	P20050	23	23	23	Meiosis-specific protein HOP1	HOP1		1	23	23	23	0	0	0	3	16	16	12	11	18	15	12	13	10	10	16	17	15	13	8	8	10	14	14	9	6	16	13	13	10	1	5	0	0	0	3	16	16	12
P20433	P20433	1	1	1	DNA-directed RNA polymerase II subunit RPB4	RPB4		1	1	1	1	1	1	1	1	0	1	1	0	1	0	0	1	0	0	0	1	1	0	1	0	1	1	0	1	0	1	0	0	0	0	0	1	1	1	1	0	1	1
P20434	P20434	2	2	2	DNA-directed RNA polymerases I, II, and III subunit RPABC1	RPB5		1	2	2	2	1	0	0	1	0	0	0	2	0	1	0	1	0	0	0	0	0	0	2	0	0	0	0	2	0	0	0	0	2	0	0	1	0	0	1	0	0	0
P20435	P20435	5	5	5	DNA-directed RNA polymerases I, II, and III subunit RPABC2	RPO26		1	5	5	5	3	3	4	3	3	3	3	4	2	2	4	3	0	0	3	3	2	2	4	0	3	3	3	1	0	2	1	3	1	0	0	3	3	4	3	3	3	3
P20457	P20457	1	1	1	DNA primase large subunit	PRI2		1	1	1	1	0	0	0	0	1	0	0	0	0	0	0	0	0	0	1	0	0	0	0	0	0	0	0	0	0	0	0	0	0	0	0	0	0	0	0	1	0	0
P20484	P20484	1	1	1	Protein MAK11	MAK11		1	1	1	1	0	0	0	1	0	0	1	0	0	0	0	0	0	0	0	0	0	0	1	0	0	1	0	1	0	0	0	0	0	0	0	0	0	0	1	0	0	1
P20486	P20486	5	5	5	Cyclin-dependent kinases regulatory subunit	CKS1		1	5	5	5	3	4	2	1	3	4	2	1	0	1	0	1	1	0	0	4	3	0	1	1	0	2	2	2	0	4	3	1	4	1	0	3	4	2	1	3	4	2
P20967	P20967	11	11	11	2-oxoglutarate dehydrogenase, mitochondrial	KGD1		1	11	11	11	3	4	4	3	4	5	8	2	4	5	4	3	6	5	1	4	3	4	3	2	3	4	2	3	2	3	5	3	3	2	3	3	4	4	3	4	5	8
P21147	P21147	2	2	2	Acyl-CoA desaturase 1	OLE1		1	2	2	2	0	0	1	1	0	0	2	0	0	0	0	0	0	2	0	0	0	0	0	0	0	0	0	0	0	0	0	0	0	0	0	0	0	1	1	0	0	2
P21242	P21242	1	1	1	Probable proteasome subunit alpha type-7	PRE10		1	1	1	1	0	0	0	0	0	0	1	0	1	1	1	0	0	0	0	1	1	1	0	1	1	1	1	0	1	1	1	1	0	0	1	0	0	0	0	0	0	1
P21243	P21243	1	1	1	Proteasome subunit alpha type-1	SCL1		1	1	1	1	0	0	0	0	0	0	0	0	0	0	0	0	0	1	0	0	0	0	0	0	0	0	0	0	0	0	0	0	0	0	0	0	0	0	0	0	0	0
P21268	P21268	2	2	2	Cyclin-dependent kinase inhibitor FAR1	FAR1		1	2	2	2	0	1	1	1	1	1	1	1	1	1	1	1	1	1	0	1	1	1	1	0	1	1	1	1	0	1	1	1	1	0	0	0	1	1	1	1	1	1
P21304	P21304	1	1	1	Periodic tryptophan protein 1	PWP1		1	1	1	1	0	0	0	0	0	0	0	0	0	0	0	0	0	0	0	0	0	1	0	0	0	0	0	0	0	1	0	0	1	0	0	0	0	0	0	0	0	0
P21306	P21306	1	1	1	ATP synthase subunit epsilon, mitochondrial	ATP15		1	1	1	1	0	0	0	0	0	0	0	0	0	0	0	0	0	1	0	0	0	0	0	0	0	0	0	0	1	0	0	0	0	0	0	0	0	0	0	0	0	0
P21524	P21524	4	4	4	Ribonucleoside-diphosphate reductase large chain 1	RNR1		1	4	4	4	1	2	1	3	3	3	3	3	3	3	2	1	2	2	2	3	3	2	1	2	2	3	2	1	2	3	3	2	1	0	2	1	2	1	3	3	3	3
P21538	P21538	10	10	10	DNA-binding protein REB1	REB1		1	10	10	10	4	4	4	2	1	2	2	3	2	1	2	3	3	8	6	3	1	2	5	0	4	2	2	3	0	4	5	3	3	0	0	4	4	4	2	1	2	2
P21560	P21560	1	1	1	Protein CBP3, mitochondrial	CBP3		1	1	1	1	0	0	1	1	0	1	0	0	1	1	1	0	0	1	1	0	0	0	0	1	0	0	0	0	0	0	0	0	0	0	0	0	0	1	1	0	1	0
P21651	P21651	17	17	17	Recombination protein 107	REC107		1	17	17	17	0	0	0	1	8	6	8	9	11	12	9	11	8	9	10	8	6	4	9	3	4	5	4	6	1	5	5	4	3	1	1	0	0	0	1	8	6	8
P21691	P21691	2	2	2	Regulatory protein SIR1	SIR1		1	2	2	2	1	1	1	1	1	1	1	1	1	1	1	0	0	0	1	2	1	0	1	0	1	2	1	1	0	2	2	2	1	0	0	1	1	1	1	1	1	1
P21801	P21801	3	3	3	Succinate dehydrogenase [ubiquinone] iron-sulfur subunit, mitochondrial	SDH2		1	3	3	3	1	1	1	1	2	2	1	2	2	2	2	1	1	0	1	2	2	2	1	0	2	2	2	1	0	2	1	2	1	0	0	1	1	1	1	2	2	1
P21954	P21954	3	3	3	Isocitrate dehydrogenase [NADP], mitochondrial	IDP1		1	3	3	3	0	0	0	0	1	0	2	0	0	1	2	0	0	1	0	0	0	1	0	0	0	2	0	0	0	0	0	0	0	0	1	0	0	0	0	1	0	2
P22082	P22082	1	1	1	Transcription regulatory protein SNF2	SNF2		1	1	1	1	0	0	0	0	0	0	0	0	0	0	0	0	0	1	0	0	0	0	0	0	0	0	0	0	0	0	0	0	0	0	0	0	0	0	0	0	0	0
P22133	P22133	15	15	15	Malate dehydrogenase, cytoplasmic	MDH2		1	15	15	15	4	6	4	6	4	6	5	9	6	7	6	4	6	6	2	7	7	2	8	2	5	6	6	6	2	6	6	4	8	5	2	4	6	4	6	4	6	5
P22134	P22134	1	1	1	DNA-3-methyladenine glycosylase	MAG1		1	1	1	1	0	0	0	1	0	0	0	1	1	1	0	1	1	0	1	1	0	0	1	1	1	1	1	1	1	1	1	1	1	0	1	0	0	0	1	0	0	0
P22138	P22138	2	2	2	DNA-directed RNA polymerase I subunit RPA135	RPA135		1	2	2	2	1	2	1	0	1	1	0	0	0	0	0	0	0	0	0	0	0	0	0	0	0	0	0	0	0	0	0	0	0	0	0	1	2	1	0	1	1	0
P22141	P22141	2	2	2	Proteasome subunit beta type-4	PRE1		1	2	2	2	0	0	0	0	0	0	0	0	0	0	0	0	0	0	0	0	0	0	0	0	1	1	0	0	1	0	0	2	0	0	1	0	0	0	0	0	0	0
P22147	P22147	1	1	1	5-3 exoribonuclease 1	XRN1		1	1	1	1	0	0	0	1	0	0	0	1	0	0	0	1	0	0	0	0	0	0	1	0	0	0	0	0	0	0	0	0	1	0	0	0	0	0	1	0	0	0
P22148	P22148	4	4	4	Protein MSN1	MSN1		1	4	4	4	2	2	2	2	2	2	1	2	2	1	1	1	1	2	0	0	1	0	2	0	0	0	1	1	0	0	0	0	1	0	0	2	2	2	2	2	2	1
P22149	P22149	3	3	3	Iron-regulated transcriptional activator AFT1	AFT1		1	3	3	3	1	0	0	1	0	0	1	1	0	0	0	1	0	2	0	0	0	0	1	0	0	0	0	1	0	0	0	0	1	0	0	1	0	0	1	0	0	1
P22202	P22202	6	1	1	Heat shock protein SSA4	SSA4		1	6	1	1	1	0	0	1	2	3	3	1	1	2	2	1	0	3	1	0	3	3	2	0	4	3	1	2	0	1	4	4	2	0	1	0	0	0	0	0	0	0
P22211	P22211	8	8	8	Nitrogen permease reactivator protein	NPR1		1	8	8	8	1	2	4	4	2	2	2	1	1	1	1	1	3	0	0	1	2	2	1	0	3	1	3	3	0	2	3	2	3	0	0	1	2	4	4	2	2	2
P22217	P22217	5	5	5	Thioredoxin-1	TRX1		1	5	5	5	4	2	3	2	2	1	1	3	1	2	1	3	1	2	0	0	2	1	3	1	2	3	1	3	1	2	1	1	2	0	1	4	2	3	2	2	1	1
P22276	P22276	1	1	1	DNA-directed RNA polymerase III subunit RPC2	RET1		1	1	1	1	0	0	0	0	0	0	0	0	0	0	0	0	0	1	0	0	0	0	0	0	0	0	0	0	0	0	0	0	0	0	0	0	0	0	0	0	0	0
P22336	P22336	5	5	5	Replication factor A protein 1	RFA1		1	5	5	5	0	0	0	0	0	0	0	1	1	1	1	1	1	1	4	4	2	2	3	1	2	3	3	5	1	5	3	4	1	0	1	0	0	0	0	0	0	0
P22434	P22434	2	2	2	3,5-cyclic-nucleotide phosphodiesterase 1	PDE1		1	2	2	2	0	0	0	0	0	0	0	1	0	0	0	1	0	0	0	0	0	0	1	0	0	0	0	1	0	0	0	0	2	0	0	0	0	0	0	0	0	0
P22438	P22438	1	1	1	Methionine--tRNA ligase, mitochondrial	MSM1		1	1	1	1	0	0	0	1	0	0	1	1	0	1	0	0	0	0	0	0	0	0	1	0	0	0	0	1	0	0	0	0	0	0	0	0	0	0	1	0	0	1
P22579	P22579	2	2	2	Transcriptional regulatory protein SIN3	SIN3		1	2	2	2	0	0	1	0	0	0	0	0	0	0	0	0	0	1	0	0	0	0	0	0	0	0	0	0	0	1	1	0	0	0	0	0	0	1	0	0	0	0
P22696	P22696	6	6	6	Peptidyl-prolyl cis-trans isomerase ESS1	ESS1		1	6	6	6	2	2	1	2	1	1	3	2	1	1	1	1	4	2	1	1	1	1	3	1	1	1	1	3	1	1	1	2	4	0	1	2	2	1	2	1	1	3
P22768	P22768	2	2	2	Argininosuccinate synthase	ARG1		1	2	2	2	0	0	0	0	1	1	1	0	1	0	1	0	0	1	0	0	0	1	0	0	0	0	0	0	0	0	0	0	0	0	0	0	0	0	0	1	1	1
P22803	P22803	5	5	5	Thioredoxin-2	TRX2		1	5	5	5	1	0	1	1	0	1	1	1	2	0	0	1	2	0	1	0	0	0	4	0	0	1	1	2	0	1	1	0	0	0	0	1	0	1	1	0	1	1
P22855	P22855	6	6	6	Alpha-mannosidase	AMS1		1	6	6	6	0	1	0	2	1	2	3	3	2	2	2	1	1	4	0	2	2	2	2	0	2	3	2	3	1	2	3	3	3	0	1	0	1	0	2	1	2	3
P22943	P22943	17	17	17	12 kDa heat shock protein	HSP12		1	17	17	17	14	14	15	14	12	13	12	14	14	15	11	12	12	8	15	14	15	14	16	13	14	12	15	14	7	13	14	12	14	6	10	14	14	15	14	12	13	12
P23180	P23180	1	1	1	Probable oxidoreductase AIM17	AIM17		1	1	1	1	0	0	0	0	0	0	1	1	0	1	0	0	0	0	0	0	0	0	0	0	0	1	0	1	0	0	0	1	0	0	0	0	0	0	0	0	0	1
P23248	P23248	20	20	11	40S ribosomal protein S1-B	RPS1B		1	20	20	11	12	11	12	10	10	9	9	11	13	7	8	11	7	7	12	12	9	10	13	5	10	9	11	10	8	11	7	9	9	1	4	12	11	12	10	10	9	9
P23254	P23254	2	2	2	Transketolase 1	TKL1		1	2	2	2	0	0	0	0	0	0	1	0	0	0	0	0	0	2	0	0	0	0	0	0	0	0	0	0	0	0	0	0	0	0	0	0	0	0	0	0	0	1
P23287;P14747	P23287;P14747	2;1	2;1	2;1	Serine/threonine-protein phosphatase 2B catalytic subunit A1;Serine/threonine-protein phosphatase 2B catalytic subunit A2	CNA1;CMP2	;	2	2	2	2	0	1	0	1	0	1	1	2	0	0	0	1	1	0	0	0	0	1	0	0	0	0	0	1	0	0	0	0	2	0	0	0	1	0	1	0	1	1
P23292;P23291	P23292	13;3	13;3	13;3	Casein kinase I homolog 2	YCK2		2	13	13	13	7	7	8	10	6	7	10	4	6	6	7	2	0	3	5	6	8	5	4	2	6	7	8	4	2	8	10	10	6	1	5	7	7	8	10	6	7	10
P23301;P19211	P23301	18;3	18;3	18;3	Eukaryotic translation initiation factor 5A-1	HYP2		2	18	18	18	9	6	7	7	9	8	10	8	9	9	10	7	6	11	8	7	7	8	10	6	9	7	9	7	8	8	8	9	9	4	5	9	6	7	7	9	8	10
P23337	P23337	8	6	6	Glycogen [starch] synthase isoform 1	GSY1		1	8	6	6	6	6	6	6	4	7	4	3	5	4	3	5	3	2	2	6	6	5	4	4	4	6	5	5	4	6	5	4	6	2	4	4	4	4	4	2	5	3
P23493	P23493	1	1	1	Mitochondrial biogenesis regulation protein 1	MBR1		1	1	1	1	1	1	1	1	0	0	0	1	1	0	0	0	0	0	1	1	0	0	1	0	1	0	0	1	0	1	0	0	1	0	0	1	1	1	1	0	0	0
P23542	P23542	4	4	4	Aspartate aminotransferase, cytoplasmic	AAT2		1	4	4	4	0	0	0	0	0	2	2	0	0	2	0	0	0	1	0	0	1	1	0	1	2	2	0	0	1	0	2	2	0	0	0	0	0	0	0	0	2	2
P23641	P23641	3	3	3	Mitochondrial phosphate carrier protein;Mitochondrial phosphate carrier protein, N-terminally processed	MIR1		1	3	3	3	0	0	0	0	1	1	3	1	1	1	1	0	0	3	1	0	1	1	2	1	0	2	0	2	1	0	1	0	1	0	0	0	0	0	0	1	1	3
P23724	P23724	2	2	2	Proteasome subunit beta type-6	PRE7		1	2	2	2	0	1	1	0	0	1	2	0	0	2	1	0	0	1	0	0	1	1	0	1	2	2	1	0	2	0	1	1	0	0	2	0	1	1	0	0	1	2
P23776	P23776	1	1	1	Glucan 1,3-beta-glucosidase I/II	EXG1		1	1	1	1	0	0	0	0	1	1	1	1	0	1	0	0	0	0	0	1	1	0	1	0	0	1	1	1	0	0	0	0	1	0	0	0	0	0	0	1	1	1
P24000	P24000	13	3	3	60S ribosomal protein L24-B	RPL24B		1	13	3	3	6	6	7	8	6	7	5	8	7	2	3	4	4	6	9	7	5	4	8	3	5	4	5	6	6	8	5	3	5	1	4	2	1	2	2	0	2	0
P24004	P24004	2	2	2	Peroxisomal ATPase PEX1	PEX1		1	2	2	2	0	0	1	1	1	1	1	1	1	1	1	2	1	0	0	1	1	1	1	1	1	1	1	2	0	1	1	1	2	0	1	0	0	1	1	1	1	1
P24276	P24276	5	5	5	Protein SSD1	SSD1		1	5	5	5	0	0	0	1	1	0	3	2	3	1	2	0	1	0	1	3	3	1	1	2	5	4	4	4	2	3	3	4	4	1	2	0	0	0	1	1	0	3
P24309	P24309	3	3	3	Lariat debranching enzyme	DBR1		1	3	3	3	1	2	1	2	1	2	2	2	2	2	2	2	0	1	0	2	1	2	2	1	2	2	1	2	2	2	2	1	2	0	1	1	2	1	2	1	2	2
P24384	P24384	3	3	3	Pre-mRNA-splicing factor ATP-dependent RNA helicase PRP22	PRP22		1	3	3	3	0	0	2	0	0	0	0	0	0	1	0	0	0	3	1	1	0	0	0	0	0	0	0	0	0	0	0	0	0	0	0	0	0	2	0	0	0	0
P24583	P24583	4	4	4	Protein kinase C-like 1	PKC1		1	4	4	4	0	0	0	0	0	0	0	0	0	0	0	1	2	2	0	1	1	0	1	1	1	1	2	2	0	1	3	3	2	1	1	0	0	0	0	0	0	0
P24719	P24719	5	5	5	Meiosis-specific serine/threonine-protein kinase MEK1	MEK1		1	5	5	5	0	0	0	0	0	2	0	1	2	2	2	3	2	1	2	3	2	2	4	3	3	2	3	3	1	2	2	3	3	0	0	0	0	0	0	0	2	0
P25042	P25042	1	1	1	Repressor ROX1	ROX1		1	1	1	1	0	0	0	1	0	0	0	1	0	0	0	0	0	1	0	0	0	0	0	0	0	0	0	0	0	0	0	0	0	0	0	0	0	0	1	0	0	0
P25043	P25043	2	2	2	Proteasome subunit beta type-2	PUP1		1	2	2	2	0	0	0	1	1	0	1	2	0	1	0	0	0	0	0	1	1	1	1	0	0	1	1	1	0	1	1	1	2	0	0	0	0	0	1	1	0	1
P25044	P25044	5	5	5	Tyrosine-protein phosphatase 1	PTP1		1	5	5	5	2	2	2	2	2	2	2	4	2	2	2	1	2	1	0	2	2	2	3	1	2	2	2	4	1	2	2	2	3	1	1	2	2	2	2	2	2	2
P25087	P25087	5	5	5	Sterol 24-C-methyltransferase	ERG6		1	5	5	5	0	0	2	0	3	3	3	1	3	2	2	0	0	1	0	2	3	3	1	0	3	4	3	1	0	3	3	3	2	0	0	0	0	2	0	3	3	3
P25338	P25338	1	1	1	Uncharacterized endoplasmic reticulum membrane protein YGL010W			1	1	1	1	0	0	0	0	0	0	0	0	0	0	0	0	0	0	0	0	0	0	0	0	0	0	0	0	0	0	0	0	1	0	0	0	0	0	0	0	0	0
P25339	P25339	2	2	2	Pumilio homology domain family member 4	PUF4		1	2	2	2	0	0	0	0	0	0	0	0	0	0	0	0	1	0	0	0	0	0	0	0	0	0	0	2	0	0	0	0	2	0	1	0	0	0	0	0	0	0
P25348	P25348	1	1	1	54S ribosomal protein L32, mitochondrial	MRPL32		1	1	1	1	0	0	0	0	0	0	0	0	0	0	0	0	0	1	0	0	0	0	0	0	0	0	0	0	0	0	0	0	0	0	0	0	0	0	0	0	0	0
P25349	P25349	2	2	2	Flavoprotein-like protein YCP4	YCP4		1	2	2	2	0	0	0	0	1	1	2	1	0	1	2	0	0	1	0	0	1	1	0	1	0	1	0	1	1	0	1	2	1	0	1	0	0	0	0	1	1	2
P25357	P25357	2	2	2	Probable DNA-binding protein SNT1	SNT1		1	2	2	2	1	0	1	0	0	1	0	1	0	0	1	1	1	1	0	1	0	0	1	0	1	0	0	0	0	0	1	1	1	0	0	1	0	1	0	0	1	0
P25364	P25364	2	2	2	Forkhead transcription factor HCM1	HCM1		1	2	2	2	1	0	0	0	1	1	1	1	1	1	1	1	0	1	0	1	1	1	1	0	1	1	1	1	0	1	1	1	1	0	0	1	0	0	0	1	1	1
P25367	P25367	2	2	2	[PIN+] prion protein RNQ1	RNQ1		1	2	2	2	1	1	1	1	0	0	0	0	1	0	0	0	0	1	0	1	0	0	0	0	0	0	0	0	0	0	0	0	1	0	0	1	1	1	1	0	0	0
P25373	P25373	1	1	1	Glutaredoxin-1	GRX1		1	1	1	1	1	0	1	0	1	1	0	1	1	0	0	0	0	0	1	0	0	1	1	0	0	1	1	1	0	1	0	0	0	0	0	1	0	1	0	1	1	0
P25375	P25375	3	3	3	Saccharolysin	PRD1		1	3	3	3	0	0	0	1	0	0	0	2	0	0	0	0	0	2	0	0	0	0	2	0	0	0	0	2	2	0	0	0	2	0	0	0	0	0	1	0	0	0
P25382	P25382	2	2	2	Ribosome assembly protein 4	RSA4		1	2	2	2	0	0	0	1	0	0	0	1	0	1	0	1	1	0	0	0	0	0	1	0	0	0	0	1	0	0	0	0	2	0	0	0	0	0	1	0	0	0
P25441	P25441	9	9	9	DNA-directed RNA polymerase III subunit RPC4	RPC53		1	9	9	9	3	3	4	3	3	4	2	5	5	3	4	4	3	4	3	4	3	5	5	2	4	4	6	6	2	6	2	5	5	1	2	3	3	4	3	3	4	2
P25443	P25443	11	11	11	40S ribosomal protein S2	RPS2		1	11	11	11	0	0	0	0	0	1	1	0	1	1	1	0	0	7	2	0	0	0	1	0	3	1	0	0	1	0	0	0	0	0	1	0	0	0	0	0	1	1
P25451	P25451	1	1	1	Proteasome subunit beta type-3	PUP3		1	1	1	1	0	0	0	0	0	0	0	0	1	0	0	0	0	0	0	0	0	0	0	0	1	0	0	0	1	0	0	0	0	0	1	0	0	0	0	0	0	0
P25453	P25453	7	7	7	Meiotic recombination protein DMC1	DMC1		1	7	7	7	0	1	1	0	1	1	1	1	2	1	1	2	1	2	2	1	1	2	4	1	1	2	1	5	1	2	2	1	3	1	1	0	1	1	0	1	1	1
P25454	P25454	1	1	1	DNA repair protein RAD51	RAD51		1	1	1	1	0	0	0	0	0	0	0	0	0	0	0	0	0	0	1	0	0	0	1	0	0	0	0	1	0	1	0	0	1	0	0	0	0	0	0	0	0	0
P25502	P25502	1	1	1	Proline utilization trans-activator	PUT3		1	1	1	1	0	0	0	0	0	0	0	0	0	0	0	0	0	0	1	1	0	0	1	0	0	0	0	0	0	1	0	1	0	0	0	0	0	0	0	0	0	0
P25567	P25567	29	29	29	RNA-binding protein SRO9	SRO9		1	29	29	29	17	17	19	18	14	15	19	13	16	15	14	11	10	12	14	10	16	15	10	6	13	13	12	10	9	11	13	14	9	3	6	17	17	19	18	14	15	19
P25569	P25569	1	1	1	Glucose-induced degradation protein 7	GID7		1	1	1	1	0	0	0	0	0	0	0	0	0	0	1	0	0	0	1	0	0	1	1	0	0	0	1	0	0	0	0	1	0	0	0	0	0	0	0	0	0	0
P25578	P25578	1	1	1	CDP-diacylglycerol--glycerol-3-phosphate 3-phosphatidyltransferase	PGS1		1	1	1	1	0	0	0	0	0	0	0	0	0	0	0	0	0	0	0	1	0	0	0	1	0	1	1	0	0	0	0	1	0	0	1	0	0	0	0	0	0	0
P25579	P25579	1	1	1	Laminarase-resistance protein LRE1	LRE1		1	1	1	1	0	0	0	0	0	0	0	0	0	0	0	0	0	0	0	0	0	0	1	0	0	0	0	1	0	0	0	0	0	0	0	0	0	0	0	0	0	0
P25588	P25588	3	3	3	Mediator of replication checkpoint protein 1	MRC1		1	3	3	3	0	0	0	0	0	0	0	0	0	0	0	0	0	2	1	0	0	0	0	0	0	0	0	0	0	0	0	0	0	0	0	0	0	0	0	0	0	0
P25605	P25605	19	19	19	Acetolactate synthase small subunit, mitochondrial	ILV6		1	19	19	19	12	12	12	13	9	11	13	12	8	12	9	8	4	2	2	7	9	6	11	2	10	7	9	12	3	9	6	5	12	1	2	12	12	12	13	9	11	13
P25611	P25611	2	2	2	Regulator of drug sensitivity 1	RDS1		1	2	2	2	0	1	2	2	0	0	0	0	1	0	0	0	1	0	0	2	0	0	0	0	0	0	1	0	0	2	1	0	1	0	0	0	1	2	2	0	0	0
P25617	P25617	4	4	4	Uncharacterized protein YCR016W			1	4	4	4	1	2	1	1	1	2	1	0	1	2	0	0	1	2	1	1	0	0	1	0	1	1	0	0	0	2	1	0	0	0	0	1	2	1	1	1	2	1
P25651	P25651	5	5	5	Monopolin complex subunit CSM1	CSM1		1	5	5	5	4	4	3	3	5	4	4	4	5	5	4	4	3	2	4	2	3	2	3	1	2	3	1	4	1	3	1	2	2	0	2	4	4	3	3	5	4	4
P25694	P25694	3	3	3	Cell division control protein 48	CDC48		1	3	3	3	2	3	2	2	3	2	3	2	2	2	1	1	1	1	2	1	1	2	2	1	1	1	1	1	2	2	1	2	2	0	1	2	3	2	2	3	2	3
P25719	P25719	2	1	1	Peptidyl-prolyl cis-trans isomerase C, mitochondrial	CPR3		1	2	1	1	0	1	0	0	1	0	1	0	1	1	1	0	1	2	1	0	2	1	0	0	1	0	0	0	2	0	1	0	0	0	1	0	0	0	0	1	0	1
P25847	P25847	4	4	4	DNA mismatch repair protein MSH2	MSH2		1	4	4	4	0	0	1	1	0	1	0	0	0	1	0	0	0	0	0	3	0	0	0	0	0	0	1	0	0	1	1	0	2	0	0	0	0	1	1	0	1	0
P26321	P26321	11	11	11	60S ribosomal protein L5	RPL5		1	11	11	11	4	4	4	4	5	3	4	6	5	4	4	4	2	5	3	5	6	4	10	3	5	5	5	6	4	5	5	4	6	0	4	4	4	4	4	5	3	4
P26343	P26343	2	2	2	Nitrogen regulatory protein DAL80	DAL80		1	2	2	2	0	1	1	0	0	0	0	1	1	0	0	0	0	1	1	0	0	0	1	0	0	0	0	0	0	0	0	0	0	0	0	0	1	1	0	0	0	0
P26570	P26570	5	5	5	Serine/threonine-protein phosphatase PP-Z1	PPZ1		1	5	5	5	2	2	1	3	1	1	2	2	1	2	2	1	0	0	0	1	2	2	3	0	1	1	1	4	0	1	1	1	2	0	0	2	2	1	3	1	1	2
P26637	P26637	1	1	1	Leucine--tRNA ligase, cytoplasmic	CDC60		1	1	1	1	0	0	0	0	0	0	0	0	1	1	0	0	0	0	0	0	1	0	0	1	0	1	0	1	0	1	0	0	1	0	1	0	0	0	0	0	0	0
P26783	P26783	6	6	6	40S ribosomal protein S5	RPS5		1	6	6	6	1	1	1	2	1	1	1	0	0	1	0	0	0	3	3	1	0	0	2	0	1	0	1	0	0	2	0	0	0	0	0	1	1	1	2	1	1	1
P26784	P26784	8	4	4	60S ribosomal protein L16-A	RPL16A		1	8	4	4	5	5	4	7	5	4	4	5	5	1	3	6	4	3	6	3	3	3	5	3	5	2	3	5	3	3	3	4	2	0	2	3	3	2	4	3	3	3
P26785	P26785	12	12	8	60S ribosomal protein L16-B	RPL16B		1	12	12	8	6	7	7	9	7	5	4	8	6	4	4	7	5	6	7	4	4	4	8	4	5	3	4	8	4	4	3	3	6	0	3	6	7	7	9	7	5	4
P26786	P26786	22	22	10	40S ribosomal protein S7-A	RPS7A		1	22	22	10	9	6	7	9	8	7	7	9	12	8	5	4	7	15	11	9	6	7	11	7	8	5	9	9	8	9	8	5	7	1	2	9	6	7	9	8	7	7
P26798	P26798	2	2	2	Protein INO2	INO2		1	2	2	2	0	1	1	2	0	0	0	0	0	0	0	1	0	1	0	0	0	0	0	0	0	0	0	1	0	0	0	0	0	0	0	0	1	1	2	0	0	0
P27472	P27472	23	23	21	Glycogen [starch] synthase isoform 2	GSY2		1	23	23	21	13	12	16	19	10	12	12	14	11	10	10	13	8	6	6	9	10	6	16	6	7	7	6	12	5	9	11	5	14	6	6	13	12	16	19	10	12	12
P27514	P27514	1	1	1	Low-affinity phosphate transporter PHO91	PHO91		1	1	1	1	0	0	0	0	0	0	0	0	0	0	0	0	0	0	0	0	0	0	0	0	0	0	0	0	0	0	0	0	1	0	0	0	0	0	0	0	0	0
P27614	P27614	22	22	22	Carboxypeptidase S	CPS1		1	22	22	22	17	15	16	19	10	11	16	15	16	11	9	12	6	5	3	15	12	8	12	4	17	9	12	14	4	11	10	8	13	5	3	17	15	16	19	10	11	16
P27616	P27616	4	4	4	Phosphoribosylaminoimidazole-succinocarboxamide synthase	ADE1		1	4	4	4	3	3	3	3	3	3	3	3	3	2	3	2	1	2	1	2	3	3	3	1	3	2	2	2	1	3	2	3	2	1	1	3	3	3	3	3	3	3
P27692	P27692	3	3	3	Transcription elongation factor SPT5	SPT5		1	3	3	3	1	1	1	0	1	1	1	0	1	1	1	1	1	2	0	1	0	1	1	0	0	1	1	1	0	2	1	1	1	0	0	1	1	1	0	1	1	1
P27705	P27705	2	2	2	Regulatory protein MIG1	MIG1		1	2	2	2	0	1	0	1	0	0	0	1	0	0	1	0	0	1	0	0	0	0	0	0	0	0	0	1	0	0	0	0	1	0	0	0	1	0	1	0	0	0
P28000	P28000	2	2	2	DNA-directed RNA polymerases I and III subunit RPAC2	RPC19		1	2	2	2	1	1	1	1	1	1	1	1	1	1	1	2	2	1	2	1	1	1	2	1	1	1	1	2	1	1	1	1	2	0	1	1	1	1	1	1	1	1
P28003	P28003	1	1	1	SWIRM domain-containing protein FUN19	FUN19		1	1	1	1	1	0	1	1	0	0	0	0	0	1	0	0	0	1	0	0	0	0	0	0	0	0	0	0	0	0	0	0	0	0	0	1	0	1	1	0	0	0
P28004	P28004	11	11	11	Pre-mRNA-processing protein 45	PRP45		1	11	11	11	5	7	7	9	5	5	5	8	6	6	4	7	4	2	9	9	5	3	10	4	6	8	6	7	1	7	6	5	6	3	2	5	7	7	9	5	5	5
P28007	P28007	1	1	1	H/ACA ribonucleoprotein complex subunit 1	GAR1		1	1	1	1	1	1	1	1	1	1	1	1	1	1	1	0	0	0	0	1	1	1	1	0	1	1	1	0	0	1	1	1	0	0	0	1	1	1	1	1	1	1
P28240	P28240	14	14	14	Isocitrate lyase	ICL1		1	14	14	14	2	1	0	1	2	5	8	2	4	3	3	1	0	4	3	0	1	3	4	0	2	5	1	2	1	0	3	2	2	0	0	2	1	0	1	2	5	8
P28241	P28241	6	6	6	Isocitrate dehydrogenase [NAD] subunit 2, mitochondrial	IDH2		1	6	6	6	1	0	3	1	2	2	2	3	2	2	3	1	0	3	2	2	2	2	1	2	2	3	2	1	2	1	2	2	1	0	2	1	0	3	1	2	2	2
P28274	P28274	4	4	3	CTP synthase 1	URA7		1	4	4	3	1	0	1	2	2	2	2	2	1	2	1	2	0	3	0	2	1	1	2	0	1	1	1	2	0	1	2	1	2	0	0	1	0	1	2	2	2	2
P28321	P28321	2	2	2	Monoglyceride lipase	YJU3		1	2	2	2	0	0	0	0	2	1	2	0	2	2	2	0	0	0	0	0	1	1	0	0	2	0	0	0	0	0	0	2	0	0	0	0	0	0	0	2	1	2
P28707	P28707	2	2	2	Co-chaperone protein SBA1	SBA1		1	2	2	2	1	0	1	1	0	0	0	1	1	1	0	2	1	1	1	1	1	1	2	1	1	1	1	1	1	1	1	1	1	1	1	1	0	1	1	0	0	0
P28834	P28834	2	2	2	Isocitrate dehydrogenase [NAD] subunit 1, mitochondrial	IDH1		1	2	2	2	0	0	0	1	0	1	0	0	1	0	0	1	0	1	1	0	0	1	0	0	0	0	0	0	1	0	0	1	0	0	0	0	0	0	1	0	1	0
P29056	P29056	6	6	6	Transcription factor IIIB 70 kDa subunit	BRF1		1	6	6	6	2	3	4	5	2	2	1	3	3	2	2	2	3	4	2	1	1	0	5	0	1	1	1	1	0	2	1	1	1	0	0	2	3	4	5	2	2	1
P29295	P29295	6	6	6	Casein kinase I homolog HRR25	HRR25		1	6	6	6	1	1	1	3	1	1	1	2	2	1	1	2	2	2	0	1	1	2	3	0	2	1	2	2	0	1	3	3	4	0	2	1	1	1	3	1	1	1
P29311	P29311	7	1	1	Protein BMH1	BMH1		1	7	1	1	0	1	1	1	0	2	2	2	1	1	2	1	0	4	1	1	2	2	1	0	2	2	2	1	0	1	1	2	1	0	0	0	0	0	0	0	0	0
P29547	P29547	2	1	1	Elongation factor 1-gamma 1	CAM1		1	2	1	1	0	0	0	0	0	1	2	0	1	1	0	0	0	0	0	0	0	0	0	0	0	1	1	0	0	0	0	0	0	0	0	0	0	0	0	0	0	1
P30619	P30619	3	3	3	Protein transport protein SEC1	SEC1		1	3	3	3	1	1	1	1	1	1	0	1	1	1	0	1	2	2	0	1	1	0	1	1	1	0	0	1	1	1	0	0	1	0	1	1	1	1	1	1	1	0
P30656	P30656	2	2	2	Proteasome subunit beta type-5	PRE2		1	2	2	2	1	1	1	1	1	1	1	1	1	1	1	0	1	1	1	1	2	2	0	1	1	1	1	1	1	1	1	2	1	0	1	1	1	1	1	1	1	1
P30822	P30822	1	1	1	Exportin-1	CRM1		1	1	1	1	0	0	0	1	0	0	0	1	0	0	0	1	0	0	0	0	0	0	1	0	0	0	0	1	0	0	0	0	1	0	0	0	0	0	1	0	0	0
P30902	P30902	2	2	2	ATP synthase subunit d, mitochondrial	ATP7		1	2	2	2	0	0	1	0	0	1	0	1	1	0	0	1	0	1	1	1	0	0	0	0	0	0	1	0	0	0	0	0	1	0	0	0	0	1	0	0	1	0
P30952	P30952	9	9	8	Malate synthase 1, glyoxysomal	MLS1		1	9	9	8	5	4	6	5	4	3	4	2	4	3	4	2	3	4	2	4	3	4	3	2	4	4	4	4	2	3	3	3	3	1	2	5	4	6	5	4	3	4
P31111	P31111	26	26	26	Synaptonemal complex protein ZIP1	ZIP1		1	26	26	26	1	0	0	0	0	1	0	0	2	1	1	6	8	6	10	22	12	6	12	9	9	15	16	16	5	23	15	15	12	1	7	1	0	0	0	0	1	0
P31244	P31244	4	4	4	DNA repair protein RAD16	RAD16		1	4	4	4	2	2	2	0	1	0	1	1	2	2	2	0	0	2	2	2	0	2	0	0	0	1	0	0	0	2	1	1	0	0	0	2	2	2	0	1	0	1
P31334	P31334	2	2	2	54S ribosomal protein L9, mitochondrial	MRPL9		1	2	2	2	0	0	0	0	0	1	1	0	1	1	1	0	0	1	0	0	0	0	0	0	0	0	0	0	0	0	0	0	0	0	0	0	0	0	0	0	1	1
P31376	P31376	8	8	8	SWR1-complex protein 3	SWC3		1	8	8	8	5	4	4	5	4	4	4	4	5	4	4	4	2	3	5	4	4	4	4	2	3	5	4	4	2	5	3	5	4	1	2	5	4	4	5	4	4	4
P31378	P31378	7	7	7	Endonuclease III homolog 1	NTG1		1	7	7	7	2	2	2	4	1	3	1	3	1	1	1	2	2	4	5	2	1	1	3	1	1	1	0	3	1	1	1	1	2	0	1	2	2	2	4	1	3	1
P31384	P31384	3	3	3	Glucose-repressible alcohol dehydrogenase transcriptional effector	CCR4		1	3	3	3	0	0	0	0	0	1	0	1	0	0	0	1	1	2	0	1	1	0	1	0	1	1	1	1	0	1	1	0	1	1	0	0	0	0	0	0	1	0
P31385	P31385	6	6	6	Transcriptional regulatory protein DEP1	DEP1		1	6	6	6	1	2	3	2	1	1	1	1	2	2	2	1	2	2	3	1	1	1	4	0	1	1	1	2	0	1	1	1	3	0	0	1	2	3	2	1	1	1
P31539	P31539	2	2	2	Heat shock protein 104	HSP104		1	2	2	2	0	0	0	0	0	0	0	0	0	0	0	0	0	1	0	0	1	0	0	1	0	0	0	0	1	0	0	0	0	0	1	0	0	0	0	0	0	0
P31787	P31787	2	2	2	Acyl-CoA-binding protein	ACB1		1	2	2	2	0	0	0	1	0	0	0	1	0	0	0	2	0	0	0	0	0	0	2	0	0	0	0	1	0	0	0	0	2	0	0	0	0	0	1	0	0	0
P32074	P32074	1	1	1	Coatomer subunit gamma	SEC21		1	1	1	1	0	1	1	1	1	1	1	0	1	1	1	0	0	0	0	1	1	1	0	0	1	1	1	1	0	1	1	1	0	0	0	0	1	1	1	1	1	1
P32179	P32179	1	1	1	3(2),5-bisphosphate nucleotidase	MET22		1	1	1	1	0	0	0	0	1	1	0	0	1	1	0	0	0	0	0	1	1	1	0	0	1	1	0	0	0	1	0	0	0	0	0	0	0	0	0	1	1	0
P32190	P32190	1	1	1	Glycerol kinase	GUT1		1	1	1	1	0	0	0	0	0	0	1	0	0	1	0	0	0	0	0	0	0	1	0	0	0	0	0	0	0	0	1	1	0	0	0	0	0	0	0	0	0	1
P32191	P32191	3	3	3	Glycerol-3-phosphate dehydrogenase, mitochondrial	GUT2		1	3	3	3	1	0	0	1	2	2	2	1	3	3	2	0	2	1	0	2	0	2	1	0	1	2	2	1	2	1	2	1	0	0	2	1	0	0	1	2	2	2
P32264	P32264	1	1	1	Glutamate 5-kinase	PRO1		1	1	1	1	0	0	0	0	0	0	0	0	0	0	0	0	0	1	0	0	0	0	1	0	0	0	0	0	0	0	0	0	0	0	0	0	0	0	0	0	0	0
P32288	P32288	2	2	2	Glutamine synthetase	GLN1		1	2	2	2	0	0	0	0	0	0	1	1	0	0	0	0	0	1	0	0	0	0	1	0	0	0	0	0	0	0	0	0	0	0	0	0	0	0	0	0	0	1
P32316;P40008	P32316	35;1	35;1	35;1	Acetyl-CoA hydrolase	ACH1		2	35	35	35	23	19	23	17	21	22	25	15	23	24	19	13	10	10	11	18	19	17	16	8	20	20	20	15	7	19	19	19	21	6	11	23	19	23	17	21	22	25
P32317	P32317	6	6	6	Protein AFG1	AFG1		1	6	6	6	1	3	2	2	2	2	3	3	0	4	3	1	2	3	0	1	2	2	2	2	2	1	0	3	0	0	0	1	3	0	1	1	3	2	2	2	2	3
P32324	P32324	10	10	10	Elongation factor 2	EFT1		1	10	10	10	2	3	2	2	3	3	4	2	3	5	4	2	2	3	4	2	2	4	4	1	3	4	2	2	2	3	5	4	2	0	3	2	3	2	2	3	3	4
P32325	P32325	1	1	1	DDK kinase regulatory subunit DBF4	DBF4		1	1	1	1	0	0	0	0	0	0	0	0	0	0	0	0	0	0	0	0	0	0	0	0	0	0	0	0	0	1	0	0	0	0	0	0	0	0	0	0	0	0
P32330	P32330	2	2	2	2-deoxy-glucose resistant protein 2	DGR2		1	2	2	2	1	0	1	0	0	0	0	0	1	0	0	0	0	1	0	0	0	0	0	1	0	0	0	0	1	0	0	0	1	0	0	1	0	1	0	0	0	0
P32333	P32333	5	5	5	TATA-binding protein-associated factor MOT1	MOT1		1	5	5	5	1	2	1	0	2	2	2	1	4	3	2	2	1	2	3	2	3	2	2	1	3	2	1	3	1	3	4	3	3	0	1	1	2	1	0	2	2	2
P32340	P32340	3	3	3	Rotenone-insensitive NADH-ubiquinone oxidoreductase, mitochondrial	NDI1		1	3	3	3	0	1	1	1	1	1	1	0	1	0	1	0	1	2	0	0	0	1	0	0	1	1	1	1	0	1	0	1	0	0	0	0	1	1	1	1	1	1
P32349	P32349	2	2	2	DNA-directed RNA polymerase III subunit RPC3	RPC82		1	2	2	2	1	1	1	1	1	2	1	1	1	1	1	1	1	1	0	1	1	0	2	1	0	1	1	1	1	1	1	1	1	0	1	1	1	1	1	1	2	1
P32351	P32351	1	1	1	Sugar utilization regulatory protein IMP2	IMP2		1	1	1	1	1	1	1	0	1	1	0	0	1	1	0	1	0	0	0	1	0	0	1	0	1	1	0	1	0	1	1	1	1	0	0	1	1	1	0	1	1	0
P32361	P32361	1	1	1	Serine/threonine-protein kinase/endoribonuclease IRE1;Serine/threonine-protein kinase;Endoribonuclease	IRE1		1	1	1	1	0	0	1	0	0	0	0	0	0	0	0	0	0	0	0	0	0	0	0	0	0	0	1	0	0	1	0	1	0	0	0	0	0	1	0	0	0	0
P32368	P32368	5	5	5	Phosphoinositide phosphatase SAC1	SAC1		1	5	5	5	1	0	0	2	0	0	0	0	0	0	0	0	2	4	0	0	0	0	0	0	0	0	0	0	0	0	0	0	0	0	0	1	0	0	2	0	0	0
P32375	P32375	1	1	1	Allantoinase	DAL1		1	1	1	1	0	0	0	0	0	0	0	0	0	0	0	0	0	1	0	0	0	0	0	0	0	0	0	0	0	0	0	0	0	0	0	0	0	0	0	0	0	0
P32385	P32385	2	2	2	Ribonucleoprotein 1	RNP1		1	2	2	2	0	0	0	0	0	0	0	0	0	0	0	0	0	0	0	0	0	0	2	0	0	0	0	1	0	0	0	0	0	0	0	0	0	0	0	0	0	0
P32387	P32387	1	1	1	54S ribosomal protein L41, mitochondrial	MRP20		1	1	1	1	0	0	0	0	0	0	1	0	0	0	0	0	0	0	0	0	0	0	0	0	1	0	0	0	1	0	0	0	0	0	1	0	0	0	0	0	0	1
P32389	P32389	3	3	3	Transcriptional activator of sulfur metabolism MET4	MET4		1	3	3	3	0	0	0	0	0	0	0	0	0	0	0	0	0	2	2	0	0	0	0	0	0	0	0	0	0	0	0	0	0	0	0	0	0	0	0	0	0	0
P32419	P32419	3	3	3	Malate dehydrogenase, peroxisomal	MDH3		1	3	3	3	0	0	0	0	0	0	1	0	0	0	1	0	0	0	0	1	0	2	0	0	1	1	1	0	1	0	0	1	0	0	1	0	0	0	0	0	0	1
P32432	P32432	3	3	3	Transcription factor SFP1	SFP1		1	3	3	3	1	1	2	2	1	0	1	3	0	0	1	1	0	1	0	0	0	0	2	0	0	0	0	0	0	0	0	1	1	0	1	1	1	2	2	1	0	1
P32445	P32445	1	1	1	Single-stranded DNA-binding protein RIM1, mitochondrial	RIM1		1	1	1	1	1	1	1	1	0	1	0	0	1	1	0	0	0	0	0	0	0	0	0	0	0	0	0	0	1	0	0	0	0	0	0	1	1	1	1	0	1	0
P32448	P32448	26	26	26	Anti-silencing protein 2	ASF2		1	26	26	26	5	8	13	11	17	17	18	19	13	17	12	12	11	7	15	7	7	5	13	1	4	6	10	8	0	11	7	7	8	2	1	5	8	13	11	17	17	18
P32449	P32449	4	4	4	Phospho-2-dehydro-3-deoxyheptonate aldolase, tyrosine-inhibited	ARO4		1	4	4	4	3	3	3	1	3	3	4	2	3	3	4	1	2	1	2	3	3	2	2	2	3	2	2	2	2	2	3	2	2	1	2	3	3	3	1	3	3	4
P32452	P32452	1	1	1	Putative prephenate dehydratase	PHA2		1	1	1	1	0	0	0	0	0	0	0	1	0	0	0	0	0	0	0	0	0	0	1	0	0	0	0	1	0	0	0	0	0	0	0	0	0	0	0	0	0	0
P32457	P32457	18	18	18	Cell division control protein 3	CDC3		1	18	18	18	11	11	12	11	11	8	13	12	12	10	12	12	3	6	11	11	10	10	12	2	10	12	9	12	4	13	10	12	11	2	4	11	11	12	11	11	8	13
P32471	P32471	9	9	9	Elongation factor 1-beta	EFB1		1	9	9	9	4	0	2	4	1	4	3	3	3	4	3	3	2	5	2	2	2	5	3	1	6	3	1	2	4	2	2	4	2	2	0	4	0	2	4	1	4	3
P32473	P32473	1	1	1	Pyruvate dehydrogenase E1 component subunit beta, mitochondrial	PDB1		1	1	1	1	0	0	0	0	0	0	1	0	1	0	1	0	0	0	0	0	0	1	0	0	1	1	0	0	0	0	0	1	0	0	0	0	0	0	0	0	0	1
P32480	P32480	4	4	4	Protein HIR2	HIR2		1	4	4	4	2	2	2	2	2	3	1	1	3	3	1	2	2	2	4	1	2	0	1	0	1	2	0	2	0	2	2	1	2	0	1	2	2	2	2	2	3	1
P32481	P32481	3	3	3	Eukaryotic translation initiation factor 2 subunit gamma	GCD11		1	3	3	3	0	0	0	0	1	0	1	0	1	1	1	0	0	1	0	0	0	1	0	0	2	1	0	0	0	0	0	0	0	0	0	0	0	0	0	1	0	1
P32485	P32485	5	5	5	Mitogen-activated protein kinase HOG1	HOG1		1	5	5	5	3	3	1	3	3	3	3	2	3	3	1	2	0	2	0	2	3	2	3	1	2	2	2	4	0	2	1	1	4	1	1	3	3	1	3	3	3	3
P32494	P32494	2	2	2	Chromatin-remodeling complexes subunit NGG1	NGG1		1	2	2	2	1	0	1	0	0	0	0	0	0	0	0	0	0	1	1	0	0	0	1	0	0	0	0	0	0	0	0	0	0	0	0	1	0	1	0	0	0	0
P32496	P32496	1	1	1	26S proteasome regulatory subunit RPN12	RPN12		1	1	1	1	0	0	0	0	0	0	1	0	1	1	1	0	0	1	0	0	0	0	0	0	1	1	1	0	1	1	0	1	0	0	1	0	0	0	0	0	0	1
P32497	P32497	1	1	1	Eukaryotic translation initiation factor 3 subunit C	NIP1		1	1	1	1	0	0	0	0	0	0	0	0	0	0	0	0	0	1	0	0	0	0	0	0	0	0	0	0	0	0	0	0	0	0	0	0	0	0	0	0	0	0
P32499	P32499	3	3	3	Nucleoporin NUP2	NUP2		1	3	3	3	0	0	0	0	0	0	1	1	0	0	0	0	0	1	0	0	0	0	2	0	1	0	0	1	0	0	0	0	1	0	0	0	0	0	0	0	0	1
P32504	P32504	3	3	3	Centromere DNA-binding protein complex CBF3 subunit A	CBF2		1	3	3	3	1	1	2	1	1	1	1	1	1	1	1	0	0	0	1	1	1	1	0	0	0	1	0	0	0	1	1	1	1	0	0	1	1	2	1	1	1	1
P32529	P32529	5	5	5	DNA-directed RNA polymerase I subunit RPA12	RPA12		1	5	5	5	0	2	2	3	0	1	0	1	0	0	0	1	0	1	3	0	1	0	1	0	0	0	0	3	0	2	0	0	1	0	0	0	2	2	3	0	1	0
P32561	P32561	2	2	2	Histone deacetylase RPD3	RPD3		1	2	2	2	0	1	0	0	0	1	0	1	1	1	1	0	1	0	0	0	1	0	2	1	0	1	1	2	1	0	1	1	2	0	1	0	1	0	0	0	1	0
P32562	P32562	2	2	2	Cell cycle serine/threonine-protein kinase CDC5/MSD2	CDC5		1	2	2	2	0	0	0	0	0	0	0	0	0	0	0	0	0	0	0	0	0	0	0	0	0	0	0	0	0	1	1	0	0	0	0	0	0	0	0	0	0	0
P32565	P32565	5	5	5	26S proteasome regulatory subunit RPN2	RPN2		1	5	5	5	1	1	1	0	1	1	1	0	1	2	1	0	0	1	1	2	1	1	0	0	2	2	3	2	0	1	1	1	0	0	0	1	1	1	0	1	1	1
P32566	P32566	6	6	6	Cell wall assembly regulator SMI1	SMI1		1	6	6	6	3	3	4	4	2	3	3	3	2	2	2	4	1	2	4	2	2	2	4	1	3	3	1	3	2	2	2	3	2	0	2	3	3	4	4	2	3	3
P32578	P32578	2	2	2	SNF1 protein kinase subunit beta-1	SIP1		1	2	2	2	0	0	0	0	0	0	0	0	0	0	0	0	0	1	1	0	0	0	0	0	0	0	0	0	0	0	0	0	0	0	0	0	0	0	0	0	0	0
P32581	P32581	3	3	3	Meiosis induction protein kinase IME2/SME1	IME2		1	3	3	3	0	0	0	0	0	0	1	1	1	3	2	1	1	0	0	3	3	1	1	1	1	1	3	2	1	3	3	3	2	0	2	0	0	0	0	0	0	1
P32582	P32582	1	1	1	Cystathionine beta-synthase	CYS4		1	1	1	1	0	0	0	0	0	0	0	0	0	0	0	0	0	0	0	0	0	1	0	0	0	0	0	0	0	0	0	0	0	0	0	0	0	0	0	0	0	0
P32583	P32583	5	5	5	Suppressor protein SRP40	SRP40		1	5	5	5	1	4	3	3	1	1	0	3	3	1	1	2	3	1	3	3	2	1	2	0	1	2	1	3	1	4	2	0	2	0	2	1	4	3	3	1	1	0
P32589	P32589	2	1	1	Heat shock protein homolog SSE1	SSE1		1	2	1	1	0	0	0	0	0	0	0	0	0	0	0	0	0	1	0	0	0	0	0	0	0	0	0	0	1	0	0	0	0	0	1	0	0	0	0	0	0	0
P32590	P32590	3	3	2	Heat shock protein homolog SSE2	SSE2		1	3	3	2	0	0	0	1	0	0	0	0	0	1	0	0	0	1	1	1	1	0	1	0	1	1	1	1	1	1	1	1	1	0	2	0	0	0	1	0	0	0
P32591	P32591	3	3	3	SWI/SNF complex subunit SWI3	SWI3		1	3	3	3	2	2	3	2	3	3	2	3	3	3	2	1	2	0	2	3	2	3	2	2	3	3	3	1	0	2	3	3	2	0	1	2	2	3	2	3	3	2
P32597	P32597	9	9	9	Nuclear protein STH1/NPS1	STH1		1	9	9	9	4	4	3	2	4	3	2	1	3	3	3	1	3	6	2	1	1	1	1	3	1	2	1	2	1	2	2	1	2	0	0	4	4	3	2	4	3	2
P32598	P32598	3	3	3	Serine/threonine-protein phosphatase PP1-2	GLC7		1	3	3	3	0	1	1	0	0	1	0	1	0	1	1	1	0	0	1	2	1	0	2	0	2	1	2	1	0	0	2	0	1	0	0	0	1	1	0	0	1	0
P32599	P32599	1	1	1	Fimbrin	SAC6		1	1	1	1	0	0	0	0	0	0	0	0	0	0	0	0	0	0	1	0	0	0	0	0	0	0	0	0	0	0	0	0	0	0	0	0	0	0	0	0	0	0
P32603	P32603	1	1	1	Sporulation-specific glucan 1,3-beta-glucosidase	SPR1		1	1	1	1	0	0	0	0	0	0	0	0	0	0	0	0	0	0	0	0	0	0	0	0	0	0	0	0	0	0	0	0	1	0	0	0	0	0	0	0	0	0
P32606	P32606	2	2	2	Putative mitochondrial translation system component PET127	PET127		1	2	2	2	1	0	1	0	0	0	0	0	0	0	0	0	0	1	0	1	1	0	0	0	0	1	0	0	0	0	1	1	0	0	0	1	0	1	0	0	0	0
P32611	P32611	2	2	2	54S ribosomal protein RML2, mitochondrial	RML2		1	2	2	2	2	2	2	2	2	2	2	2	2	2	2	1	0	0	0	2	2	2	2	0	2	2	2	2	0	2	2	2	2	0	0	2	2	2	2	2	2	2
P32621	P32621	2	2	2	Guanosine-diphosphatase	GDA1		1	2	2	2	0	0	0	0	0	0	0	0	0	0	0	0	0	1	1	1	1	0	0	0	1	1	1	0	0	1	0	1	0	0	0	0	0	0	0	0	0	0
P32639	P32639	1	1	1	Pre-mRNA-splicing helicase BRR2	BRR2		1	1	1	1	0	0	0	0	0	0	0	0	0	0	0	0	0	1	0	0	0	0	0	0	0	0	0	0	0	0	0	0	0	0	0	0	0	0	0	0	0	0
P32657	P32657	4	4	4	Chromo domain-containing protein 1	CHD1		1	4	4	4	1	1	2	1	1	1	1	1	1	1	1	1	0	1	0	1	1	1	1	0	1	1	2	1	0	2	1	1	1	0	0	1	1	2	1	1	1	1
P32771	P32771	2	2	2	S-(hydroxymethyl)glutathione dehydrogenase	SFA1		1	2	2	2	0	0	0	0	0	0	0	0	0	0	0	0	0	0	0	0	0	0	0	0	1	0	0	1	0	0	0	1	0	0	0	0	0	0	0	0	0	0
P32773	P32773	11	11	11	Transcription initiation factor IIA large subunit	TOA1		1	11	11	11	9	9	8	9	6	7	7	5	8	7	8	5	4	4	6	5	6	6	9	2	8	7	5	8	2	5	6	7	8	0	3	9	9	8	9	6	7	7
P32775	P32775	12	12	12	1,4-alpha-glucan-branching enzyme	GLC3		1	12	12	12	8	7	9	6	8	8	7	6	10	7	6	4	6	4	1	10	5	6	7	3	8	7	7	7	3	9	5	5	10	3	5	8	7	9	6	8	8	7
P32796	P32796	2	2	2	Carnitine O-acetyltransferase, mitochondrial	CAT2		1	2	2	2	0	1	0	0	1	1	1	0	0	1	2	0	0	1	0	0	0	1	0	1	2	1	2	0	1	1	0	1	0	0	1	0	1	0	0	1	1	1
P32805	P32805	10	10	10	Zinc finger protein FZF1	FZF1		1	10	10	10	6	5	5	7	4	4	3	7	4	5	4	6	5	2	2	3	4	2	7	3	4	4	2	6	2	4	5	3	5	2	3	6	5	5	7	4	4	3
P32832	P32832	3	3	3	Chromatin structure-remodeling complex subunit RSC7	NPL6		1	3	3	3	3	2	2	0	1	1	1	0	2	1	2	0	1	1	2	2	1	0	2	1	0	1	1	0	0	1	1	0	1	0	1	3	2	2	0	1	1	1
P32833	P32833	3	3	3	Origin recognition complex subunit 2	ORC2		1	3	3	3	1	0	1	1	0	1	0	0	1	1	1	1	1	1	3	1	0	0	0	1	1	0	1	1	1	0	0	0	0	0	0	1	0	1	1	0	1	0
P32835;P32836	P32835;P32836	6;6	6;6	6;6	GTP-binding nuclear protein GSP1/CNR1;GTP-binding nuclear protein GSP2/CNR2	GSP1;GSP2	;	2	6	6	6	0	1	1	1	1	0	0	1	1	0	0	2	0	1	1	0	0	0	3	0	1	0	1	1	1	0	0	2	1	0	2	0	1	1	1	1	0	0
P32841	P32841	1	1	1	Meiotic recombination protein REC114	REC114		1	1	1	1	0	0	0	0	0	0	0	0	1	1	0	0	0	0	0	0	0	0	0	0	0	0	0	0	0	0	0	0	0	0	0	0	0	0	0	0	0	0
P32849	P32849	2	2	2	DNA repair protein RAD5	RAD5		1	2	2	2	0	0	0	0	1	1	1	1	0	0	1	0	0	2	1	0	0	0	2	0	0	0	0	0	0	0	0	0	0	0	0	0	0	0	0	1	1	1
P32861	P32861	5	5	5	UTP--glucose-1-phosphate uridylyltransferase	UGP1		1	5	5	5	0	0	1	0	4	3	4	1	3	3	3	0	0	2	0	1	4	4	2	1	4	3	4	1	1	1	2	2	0	0	1	0	0	1	0	4	3	4
P32891	P32891	4	4	4	D-lactate dehydrogenase [cytochrome] 1, mitochondrial	DLD1		1	4	4	4	0	0	0	1	2	2	2	1	1	2	2	1	0	3	0	1	2	1	1	0	1	0	0	0	1	0	0	0	0	0	0	0	0	0	1	2	2	2
P32892	P32892	2	2	2	ATP-dependent RNA helicase DRS1	DRS1		1	2	2	2	1	1	1	1	1	2	2	1	2	1	1	2	1	1	2	2	1	1	2	1	2	2	1	1	1	1	2	2	1	0	1	1	1	1	1	1	2	2
P32895	P32895	1	1	1	Ribose-phosphate pyrophosphokinase 1	PRS1		1	1	1	1	0	0	0	0	1	1	1	1	0	1	1	0	0	0	1	0	0	1	1	0	0	0	1	0	0	0	1	1	0	0	0	0	0	0	0	1	1	1
P32896	P32896	3	3	3	Protein PDC2	PDC2		1	3	3	3	1	1	1	1	1	1	1	1	1	1	1	1	1	1	1	1	1	1	1	0	1	1	1	2	0	1	1	1	1	0	1	1	1	1	1	1	1	1
P32897	P32897	1	1	1	Mitochondrial import inner membrane translocase subunit TIM23	TIM23		1	1	1	1	0	0	0	0	0	0	0	0	0	0	0	0	0	1	0	0	0	0	0	0	0	0	0	0	0	0	0	0	0	0	0	0	0	0	0	0	0	0
P32898	P32898	1	1	1	Mitochondrial presequence protease	CYM1		1	1	1	1	1	1	1	0	1	1	1	0	1	1	1	0	1	1	0	1	0	0	0	0	0	0	0	0	1	0	0	0	0	0	1	1	1	1	0	1	1	1
P46654;P32905	P46654;P32905	2;2	2;2	2;2	40S ribosomal protein S0-B;40S ribosomal protein S0-A	RPS0B;RPS0A	;	2	2	2	2	0	0	0	0	1	1	0	1	1	0	0	0	0	1	0	0	1	0	0	0	0	1	0	0	1	0	0	0	0	0	0	0	0	0	0	1	1	0
P32908	P32908	21	21	21	Structural maintenance of chromosomes protein 1	SMC1		1	21	21	21	0	0	0	1	2	6	3	7	9	7	1	12	12	7	16	13	7	5	6	6	5	10	10	11	4	12	12	7	8	2	7	0	0	0	1	2	6	3
P32911	P32911	2	2	2	Eukaryotic translation initiation factor eIF-1	SUI1		1	2	2	2	0	0	0	0	0	0	0	0	0	0	0	0	0	1	0	0	0	0	1	0	0	0	0	0	0	0	0	0	0	0	0	0	0	0	0	0	0	0
P33122	P33122	19	19	19	Serine-rich protein TYE7	TYE7		1	19	19	19	16	17	15	16	12	12	8	8	7	4	2	4	2	4	8	1	2	1	5	0	2	3	1	2	0	1	0	2	0	0	0	16	17	15	16	12	12	8
P33201	P33201	2	2	2	Ribosome assembly factor MRT4	MRT4		1	2	2	2	0	0	0	0	0	0	0	0	0	0	0	0	1	1	1	0	0	0	0	0	0	0	0	0	0	0	0	0	1	0	1	0	0	0	0	0	0	0
P33202	P33202	2	2	2	Ubiquitin fusion degradation protein 4	UFD4		1	2	2	2	0	0	0	0	0	0	0	0	0	0	0	0	0	1	0	0	0	0	0	0	1	0	0	0	0	0	0	0	0	0	0	0	0	0	0	0	0	0
P33298	P33298	2	2	2	26S protease regulatory subunit 6B homolog	RPT3		1	2	2	2	0	0	0	0	0	0	0	0	0	0	0	0	0	1	1	1	0	1	0	0	1	1	1	0	0	1	1	1	1	0	0	0	0	0	0	0	0	0
P33303	P33303	8	8	8	Succinate/fumarate mitochondrial transporter	SFC1		1	8	8	8	0	1	2	0	4	4	5	2	4	4	4	0	1	7	0	2	2	3	1	4	5	5	4	1	4	2	4	4	1	0	4	0	1	2	0	4	4	5
P33307	P33307	1	1	1	Importin alpha re-exporter	CSE1		1	1	1	1	0	0	0	0	0	0	0	0	0	0	0	0	0	0	0	1	0	0	0	0	0	0	1	0	0	1	1	1	0	0	0	0	0	0	0	0	0	0
P33322	P33322	6	6	6	H/ACA ribonucleoprotein complex subunit 4	CBF5		1	6	6	6	5	5	3	4	4	4	2	3	3	3	3	2	1	2	4	3	4	3	4	0	1	4	2	3	0	3	4	2	4	1	0	5	5	3	4	4	4	2
P33327	P33327	1	1	1	NAD-specific glutamate dehydrogenase	GDH2		1	1	1	1	1	0	1	1	0	0	0	0	0	0	0	1	0	0	0	0	0	0	1	0	0	0	0	0	0	0	0	0	1	0	0	1	0	1	1	0	0	0
P33330	P33330	3	3	3	Phosphoserine aminotransferase	SER1		1	3	3	3	0	0	0	0	1	1	1	0	1	1	1	0	0	3	0	0	0	1	0	1	1	1	1	0	1	0	1	1	0	0	1	0	0	0	0	1	1	1
P33416	P33416	1	1	1	Heat shock protein 78, mitochondrial	HSP78		1	1	1	1	0	0	0	0	0	0	0	0	1	1	1	1	0	0	1	1	1	1	1	0	1	1	1	1	0	1	1	1	1	0	0	0	0	0	0	0	0	0
P33417	P33417	6	6	6	Intrastrand cross-link recognition protein	IXR1		1	6	6	6	1	1	1	1	0	0	0	2	1	0	1	1	1	1	2	1	1	1	1	0	2	1	1	1	0	1	1	1	2	0	0	1	1	1	1	0	0	0
P33442	P33442	18	9	9	40S ribosomal protein S1-A	RPS1A		1	18	9	9	12	10	11	9	10	11	10	9	11	8	9	10	5	9	10	10	9	9	11	4	10	10	10	9	7	9	7	8	7	2	4	7	6	7	7	6	7	6
P33748	P33748	3	3	3	Zinc finger protein MSN2	MSN2		1	3	3	3	0	0	0	0	0	0	1	1	1	2	1	0	1	3	1	1	0	1	0	1	1	1	0	1	1	1	1	1	1	0	2	0	0	0	0	0	0	1
P33749	P33749	2	2	2	Zinc finger protein MSN4	MSN4		1	2	2	2	1	0	1	1	1	2	2	1	1	1	1	1	2	1	2	0	1	0	0	0	1	2	1	1	1	0	1	0	1	1	0	1	0	1	1	1	2	2
P33755	P33755	4	4	4	Nuclear protein localization protein 4	NPL4		1	4	4	4	0	0	0	0	0	0	0	0	0	0	0	1	0	1	0	0	0	0	0	0	0	0	0	3	0	0	0	0	2	0	0	0	0	0	0	0	0	0
P33892	P33892	1	1	1	Translational activator GCN1	GCN1		1	1	1	1	1	1	1	1	1	0	1	1	1	1	1	1	0	0	1	1	1	0	1	0	1	1	0	1	0	1	1	1	1	0	0	1	1	1	1	1	0	1
P33893	P33893	3	3	3	Glutamyl-tRNA(Gln) amidotransferase subunit B, mitochondrial	PET112		1	3	3	3	2	2	2	2	1	1	1	1	1	1	2	0	0	0	0	1	1	0	0	0	0	0	0	1	0	0	0	0	0	0	0	2	2	2	2	1	1	1
P34087	P34087	1	1	1	DNA-directed RNA polymerase II subunit RPB7	RPB7		1	1	1	1	0	0	0	0	0	0	0	0	1	0	0	0	0	0	0	0	0	0	0	0	1	0	0	0	1	0	0	0	0	0	1	0	0	0	0	0	0	0
P34110	P34110	1	1	1	Vacuolar protein sorting-associated protein 35	VPS35		1	1	1	1	0	0	0	0	0	0	0	0	0	0	0	0	1	0	0	0	0	0	0	0	0	0	0	0	0	0	0	0	1	0	0	0	0	0	0	0	0	0
P34111	P34111	3	3	3	Transcription factor tau 138 kDa subunit	TFC3		1	3	3	3	3	1	3	1	2	3	2	1	3	1	2	2	2	1	3	3	2	1	2	2	1	2	3	1	1	3	3	3	1	1	2	3	1	3	1	2	3	2
P34163	P34163	2	2	2	Sterol esterase TGL1	TGL1		1	2	2	2	0	0	0	0	0	0	0	0	0	0	0	0	0	0	0	0	0	0	0	0	0	0	0	1	0	0	0	0	2	0	0	0	0	0	0	0	0	0
P34216	P34216	4	4	4	EH domain-containing and endocytosis protein 1	EDE1		1	4	4	4	0	0	0	0	0	0	0	0	0	0	0	0	0	1	2	1	0	0	1	0	1	0	1	4	0	1	1	1	0	0	1	0	0	0	0	0	0	0
P34219	P34219	4	4	4	Transcriptional regulatory protein TOD6	TOD6		1	4	4	4	2	4	4	3	2	4	3	0	2	1	2	0	1	1	2	2	4	1	0	1	1	2	0	2	1	2	4	3	2	1	3	2	4	4	3	2	4	3
P34226	P34226	1	1	1	Protein SKT5	SKT5		1	1	1	1	0	0	0	0	0	0	0	1	0	0	0	1	0	0	1	0	0	0	1	0	0	0	0	1	0	1	0	0	1	0	0	0	0	0	0	0	0	0
P34227	P34227	4	4	4	Mitochondrial peroxiredoxin PRX1	PRX1		1	4	4	4	1	1	1	1	2	2	2	2	2	2	2	2	0	2	1	2	2	2	2	0	2	1	2	2	0	2	2	2	1	0	0	1	1	1	1	2	2	2
P34228	P34228	9	9	9	Putative transcription factor SEF1	SEF1		1	9	9	9	4	3	6	3	4	3	4	3	5	6	1	2	3	4	5	5	4	3	6	4	6	3	6	3	3	5	4	5	2	0	3	4	3	6	3	4	3	4
P34240	P34240	2	2	2	Zinc-regulated transporter 3	ZRT3		1	2	2	2	0	0	0	0	0	0	0	0	0	0	0	0	0	0	0	0	0	0	0	0	0	0	0	2	0	0	0	0	0	0	0	0	0	0	0	0	0	0
P34243	P34243	2	2	2	DNA polymerase alpha-associated DNA helicase A	HCS1		1	2	2	2	0	0	0	1	0	0	0	1	0	0	0	0	0	1	0	0	0	0	1	0	0	0	0	1	0	0	0	0	0	0	0	0	0	0	1	0	0	0
P34247	P34247	1	1	1	U3 small nucleolar RNA-associated protein 11	UTP11		1	1	1	1	1	1	1	1	1	1	1	1	1	1	1	0	0	0	0	1	0	1	1	0	1	0	1	1	0	1	0	0	1	0	0	1	1	1	1	1	1	1
P34730	P34730	7	7	1	Protein BMH2	BMH2		1	7	7	1	1	2	2	2	0	2	2	2	1	1	3	1	1	3	2	1	2	3	1	1	3	2	3	2	0	1	1	3	1	0	1	1	2	2	2	0	2	2
P34756	P34756	6	6	6	1-phosphatidylinositol 3-phosphate 5-kinase FAB1	FAB1		1	6	6	6	4	4	5	2	4	4	5	1	5	4	4	0	1	4	2	5	5	4	3	4	5	4	5	3	3	5	4	5	4	2	4	4	4	5	2	4	4	5
P34760	P34760	13	13	13	Peroxiredoxin TSA1	TSA1		1	13	13	13	6	4	5	4	7	6	10	7	9	6	9	5	4	6	4	9	5	4	9	4	8	5	8	7	4	7	5	6	5	2	4	6	4	5	4	7	6	10
P34909	P34909	8	8	8	General negative regulator of transcription subunit 4	MOT2		1	8	8	8	5	5	4	6	3	3	4	6	3	4	5	4	3	2	2	3	4	4	5	3	4	4	4	5	3	3	4	3	5	3	3	5	5	4	6	3	3	4
P35176	P35176	5	5	5	Peptidyl-prolyl cis-trans isomerase D	CPR5		1	5	5	5	1	1	2	3	2	2	3	2	2	2	1	2	1	3	1	2	2	2	3	1	3	2	2	3	2	1	2	1	3	0	1	1	1	2	3	2	2	3
P35177	P35177	3	3	3	Transcriptional activator SPT7	SPT7		1	3	3	3	2	2	2	1	2	1	0	1	1	2	2	0	0	2	1	1	0	1	0	0	1	1	1	0	0	1	1	2	1	0	0	2	2	2	1	2	1	0
P35187	P35187	9	9	9	ATP-dependent helicase SGS1	SGS1		1	9	9	9	0	0	0	0	0	0	0	0	1	2	1	0	1	3	2	6	3	2	3	2	2	4	3	6	1	5	3	4	4	1	1	0	0	0	0	0	0	0
P35189	P35189	2	2	2	Transcription initiation factor TFIID subunit 14	TAF14		1	2	2	2	1	1	1	2	1	1	1	2	1	1	1	2	1	1	1	1	1	1	1	1	1	1	1	2	1	1	1	1	2	1	1	1	1	1	2	1	1	1
P35194	P35194	3	3	3	U3 small nucleolar RNA-associated protein 20	UTP20		1	3	3	3	1	1	1	1	1	1	1	1	1	1	1	1	0	1	1	1	1	2	1	1	2	1	1	1	1	2	1	2	2	0	1	1	1	1	1	1	1	1
P35201	P35201	2	2	2	Protein MIF2	MIF2		1	2	2	2	0	0	0	0	0	0	0	0	1	0	0	1	0	1	0	1	0	0	2	0	0	0	0	0	0	0	0	0	1	0	0	0	0	0	0	0	0	0
P35691	P35691	5	5	5	Translationally-controlled tumor protein homolog	TMA19		1	5	5	5	4	2	4	3	2	2	2	4	3	2	1	3	3	3	3	2	2	0	4	0	2	1	2	3	0	1	2	2	4	1	0	4	2	4	3	2	2	2
P35719	P35719	7	7	7	Uncharacterized protein MRP8	MRP8		1	7	7	7	4	2	2	2	1	2	2	2	2	1	2	2	1	2	1	2	4	1	4	2	1	3	2	2	2	4	2	3	3	1	1	4	2	2	2	1	2	2
P35732	P35732	3	3	3	RNA polymerase II degradation factor 1	DEF1		1	3	3	3	2	1	1	2	1	1	0	1	3	2	2	1	2	2	1	2	0	0	1	1	3	1	1	2	2	2	2	2	3	1	1	2	1	1	2	1	1	0
P35817	P35817	3	3	3	Bromodomain-containing factor 1	BDF1		1	3	3	3	3	3	3	3	2	2	2	2	2	2	2	2	2	1	2	3	1	2	3	1	2	1	2	2	1	2	2	2	1	0	2	3	3	3	3	2	2	2
P35845	P35845	2	2	2	Oxysterol-binding protein homolog 1	SWH1		1	2	2	2	0	0	0	0	0	0	0	0	0	0	0	0	0	2	0	0	0	0	0	0	0	0	0	0	0	0	0	0	0	0	0	0	0	0	0	0	0	0
P38711;P35997	P38711;P35997	5;5	5;5	5;5	40S ribosomal protein S27-B;40S ribosomal protein S27-A	RPS27B;RPS27A	;	2	5	5	5	4	4	4	4	5	5	5	5	4	5	5	5	4	4	5	4	5	4	3	5	5	4	4	4	4	4	5	5	5	3	3	4	4	4	4	5	5	5
P36004	P36004	4	4	4	Probable serine/threonine-protein kinase KKQ8	KKQ8		1	4	4	4	1	2	2	3	0	0	1	2	1	1	0	2	2	2	0	2	1	0	2	1	1	0	0	3	0	3	1	0	3	1	2	1	2	2	3	0	0	1
P36006;Q04439	P36006	7;2	7;2	7;2	Myosin-3	MYO3		2	7	7	7	0	0	0	0	0	0	1	0	0	0	0	0	0	5	1	1	0	0	0	1	0	0	0	1	0	0	0	1	2	0	1	0	0	0	0	0	0	1
P36008	P36008	5	5	4	Elongation factor 1-gamma 2	TEF4		1	5	5	4	1	0	0	2	1	2	2	1	2	2	1	1	0	2	1	0	0	1	1	1	1	2	2	2	1	0	0	0	0	0	1	1	0	0	2	1	2	2
P36010	P36010	1	1	1	Nucleoside diphosphate kinase	YNK1		1	1	1	1	0	0	0	0	0	0	0	0	0	0	0	0	0	1	0	0	0	0	0	0	0	0	0	0	0	0	0	0	0	0	0	0	0	0	0	0	0	0
P36012	P36012	1	1	1	Histone H3-like centromeric protein CSE4	CSE4		1	1	1	1	1	1	1	0	0	0	1	0	1	0	0	0	0	0	0	0	0	0	0	0	0	0	0	0	0	0	0	0	0	0	0	1	1	1	0	0	0	1
P36015	P36015	1	1	1	Synaptobrevin homolog YKT6	YKT6		1	1	1	1	0	0	0	0	0	0	0	0	0	0	0	0	0	0	0	0	0	0	0	0	1	0	0	0	1	0	0	1	0	0	1	0	0	0	0	0	0	0
P36026	P36026	8	8	8	Ubiquitin carboxyl-terminal hydrolase 11	UBP11		1	8	8	8	1	1	1	2	1	1	1	0	1	1	1	1	0	3	0	2	2	1	1	2	1	2	2	2	1	3	3	1	1	0	2	1	1	1	2	1	1	1
P36046	P36046	1	1	1	Mitochondrial intermembrane space import and assembly protein 40	MIA40		1	1	1	1	0	1	1	1	1	1	1	1	1	1	1	1	1	0	1	1	1	1	1	1	1	1	1	1	1	0	1	1	1	0	0	0	1	1	1	1	1	1
P36047	P36047	1	1	1	Protein phosphatase 1 regulatory subunit SDS22	SDS22		1	1	1	1	0	0	0	0	0	0	0	0	0	0	0	0	0	1	0	0	0	0	0	0	0	0	0	0	0	0	0	0	0	0	0	0	0	0	0	0	0	0
P36049	P36049	2	2	2	rRNA-processing protein EBP2	EBP2		1	2	2	2	1	1	1	1	1	0	1	0	1	1	0	0	0	0	2	1	1	0	1	0	1	1	0	1	0	1	1	0	0	0	1	1	1	1	1	1	0	1
P36059	P36059	1	1	1	ATP-dependent (S)-NAD(P)H-hydrate dehydratase			1	1	1	1	0	0	0	0	1	0	0	0	0	0	0	0	0	0	0	0	0	1	0	0	0	0	0	0	0	0	0	1	0	0	0	0	0	0	0	1	0	0
P36060	P36060	7	7	7	NADH-cytochrome b5 reductase 2;NADH-cytochrome b5 reductase p34 form;NADH-cytochrome b5 reductase p32 form	MCR1		1	7	7	7	2	3	2	3	3	3	4	2	3	3	2	1	0	4	3	2	4	3	2	1	4	2	3	0	2	2	4	2	1	0	2	2	3	2	3	3	3	4
P36069	P36069	3	3	3	Probable phosphomutase PMU1	PMU1		1	3	3	3	3	3	3	2	2	3	3	2	3	2	2	2	2	0	0	2	3	1	2	3	3	2	2	2	2	2	2	2	2	1	3	3	3	3	2	2	3	3
P36078	P36078	5	5	5	Helper of Tim protein 13	HOT13		1	5	5	5	3	2	2	3	2	2	3	4	3	2	2	2	0	0	1	2	2	2	3	2	2	2	1	3	2	2	2	1	4	0	2	3	2	2	3	2	2	3
P36080	P36080	1	1	1	Ribosomal RNA-processing protein 14	RRP14		1	1	1	1	0	0	0	0	0	0	0	0	0	0	0	0	0	0	0	0	0	0	0	0	0	0	1	0	0	0	0	0	0	0	0	0	0	0	0	0	0	0
P36081	P36081	2	2	2	Uncharacterized protein YKL077W	YKL077W		1	2	2	2	0	0	0	1	0	0	0	0	1	0	1	0	0	1	1	0	0	1	0	0	0	1	0	0	2	0	0	0	0	0	1	0	0	0	1	0	0	0
P36093	P36093	1	1	1	Putative transcription factor PHD1	PHD1		1	1	1	1	0	1	1	1	0	1	1	1	1	0	1	0	0	0	0	1	1	1	1	0	1	0	0	0	0	0	1	1	1	0	0	0	1	1	1	0	1	1
P36094	P36094	1	1	1	Spindle pole body component SPC42	SPC42		1	1	1	1	0	0	0	0	0	0	0	0	1	0	0	0	0	0	0	0	0	0	0	0	0	0	0	0	0	0	0	1	1	0	0	0	0	0	0	0	0	0
P36100	P36100	1	1	1	Transcription initiation factor IIE subunit alpha	TFA1		1	1	1	1	1	1	1	0	1	1	1	1	1	1	1	0	0	1	0	1	1	1	1	1	1	1	1	0	1	1	1	1	0	0	1	1	1	1	0	1	1	1
P38754;P36105	P38754;P36105	6;6	6;6	6;6	60S ribosomal protein L14-B;60S ribosomal protein L14-A	RPL14B;RPL14A	;	2	6	6	6	0	0	1	2	2	1	3	4	2	1	2	1	0	3	4	0	1	1	2	0	2	1	0	2	2	1	1	2	1	0	0	0	0	1	2	2	1	3
P36114	P36114	3	3	3	Mitochondrial outer membrane protein YKR018C	YKR018C		1	3	3	3	0	0	0	1	0	0	0	0	0	0	0	2	0	0	0	0	0	0	0	0	0	1	1	3	0	1	1	0	2	0	0	0	0	0	1	0	0	0
P36126	P36126	10	10	10	Phospholipase D1	SPO14		1	10	10	10	1	1	1	3	0	2	1	1	0	1	2	2	3	3	1	3	4	1	1	2	4	4	2	2	1	3	4	4	4	0	1	1	1	1	3	0	2	1
P36139	P36139	8	8	8	Protein PET10	PET10		1	8	8	8	2	4	4	3	2	3	1	4	3	2	2	3	2	5	2	2	3	2	6	2	6	4	3	5	1	4	4	3	5	0	3	2	4	4	3	2	3	1
P36145	P36145	6	6	6	Transcription initiation factor IIE subunit beta	TFA2		1	6	6	6	1	2	1	1	1	2	1	1	1	2	1	1	1	2	3	2	2	2	3	1	2	1	2	2	1	2	2	2	2	1	1	1	2	1	1	1	2	1
P36155	P36155	3	3	3	Uncharacterized protein YKR075C	YKR075C		1	3	3	3	0	0	1	2	0	0	0	0	0	0	0	0	0	0	0	0	0	0	0	0	0	0	0	0	0	0	0	0	0	0	0	0	0	1	2	0	0	0
P36156	P36156	9	9	9	Glutathione S-transferase omega-like 2	ECM4		1	9	9	9	6	6	7	6	7	6	8	5	6	6	7	4	4	0	1	6	6	5	5	3	6	5	5	6	1	6	5	6	5	3	3	6	6	7	6	7	6	8
P36157	P36157	2	2	2	Putative transcriptional activator MSA2	MSA2		1	2	2	2	1	1	1	1	1	1	2	1	1	0	2	1	1	1	0	1	1	1	1	0	1	1	0	1	1	1	0	1	1	0	1	1	1	1	1	1	1	2
P36159	P36159	2	2	2	Ribonuclease Z	TRZ1		1	2	2	2	0	0	0	0	0	1	0	0	0	0	0	0	1	0	0	2	0	0	0	0	1	0	0	1	0	1	1	0	2	0	0	0	0	0	0	0	1	0
P36421	P36421	2	2	2	Tyrosine--tRNA ligase, cytoplasmic	TYS1		1	2	2	2	0	0	0	2	0	0	0	2	0	0	0	2	0	1	0	0	0	0	1	0	0	0	0	1	0	0	0	0	0	0	0	0	0	0	2	0	0	0
P37263	P37263	1	1	1	UPF0743 protein YCR087C-A			1	1	1	1	0	0	1	0	0	0	0	0	1	0	0	0	0	0	1	1	0	0	0	0	0	0	0	0	0	0	1	0	0	0	0	0	0	1	0	0	0	0
P37291	P37291	32	32	32	Serine hydroxymethyltransferase, cytosolic	SHM2		1	32	32	32	21	16	24	22	19	19	23	19	16	17	14	12	17	8	12	16	16	11	18	12	15	14	14	17	9	13	13	10	22	11	9	21	16	24	22	19	19	23
P37292	P37292	3	3	3	Serine hydroxymethyltransferase, mitochondrial	SHM1		1	3	3	3	1	1	1	1	1	1	2	2	1	1	2	1	1	1	0	0	1	2	1	0	1	0	0	2	1	1	1	1	1	0	1	1	1	1	1	1	1	2
P38009;P54113	P38009	4;1	4;1	4;1	Bifunctional purine biosynthesis protein ADE17;Phosphoribosylaminoimidazolecarboxamide formyltransferase;IMP cyclohydrolase	ADE17		2	4	4	4	0	0	0	0	1	1	2	1	1	1	2	0	0	1	0	0	1	0	0	0	1	2	0	0	2	0	0	2	0	0	0	0	0	0	0	1	1	2
P38011	P38011	19	19	19	Guanine nucleotide-binding protein subunit beta-like protein	ASC1		1	19	19	19	2	1	3	4	5	4	7	5	8	5	5	3	2	8	4	2	3	3	4	2	3	4	2	3	5	2	3	3	5	0	2	2	1	3	4	5	4	7
P38013	P38013	3	3	3	Peroxiredoxin type-2	AHP1		1	3	3	3	2	1	1	1	1	0	1	2	0	2	1	0	0	0	0	0	0	0	1	0	1	0	0	2	0	0	0	0	1	1	0	2	1	1	1	1	0	1
P38041	P38041	11	11	11	Protein BOB1	BOI1		1	11	11	11	1	6	4	4	2	3	3	3	1	1	3	2	2	7	1	2	3	3	3	2	2	0	1	3	2	0	3	1	2	0	2	1	6	4	4	2	3	3
P38061	P38061	23	23	23	60S ribosomal protein L32	RPL32		1	23	23	23	13	11	12	9	14	12	15	14	13	12	14	11	9	10	9	8	13	15	14	9	12	12	12	13	9	9	9	13	17	4	9	13	11	12	9	14	12	15
P38071	P38071	3	3	3	Enoyl-[acyl-carrier protein] reductase [NADPH, B-specific], mitochondrial	ETR1		1	3	3	3	0	0	0	0	1	2	2	1	2	2	2	1	0	0	0	1	2	2	1	0	2	2	1	0	0	1	2	2	0	0	0	0	0	0	0	1	2	2
P38077	P38077	3	3	3	ATP synthase subunit gamma, mitochondrial	ATP3		1	3	3	3	1	1	1	1	1	1	1	1	1	1	2	1	1	0	0	1	1	1	1	1	1	1	1	1	2	1	1	1	1	1	1	1	1	1	1	1	1	1
P38081	P38081	1	1	1	Uncharacterized glycosyl hydrolase YBR056W			1	1	1	1	0	0	0	0	0	0	1	1	1	1	0	0	0	0	0	0	0	1	1	1	0	1	1	1	0	1	0	1	0	0	0	0	0	0	0	0	0	1
P38082	P38082	2	2	2	Probable transcriptional regulator NRG2	NRG2		1	2	2	2	1	0	2	0	0	0	0	0	0	0	0	0	0	0	0	0	0	0	0	0	0	0	0	0	0	0	0	0	0	0	0	1	0	2	0	0	0	0
P38089	P38089	1	1	1	Protein phosphatase 2C homolog 4	PTC4		1	1	1	1	0	0	0	1	1	1	1	1	0	0	0	0	0	0	0	1	1	0	1	0	0	0	1	1	0	1	0	0	0	0	0	0	0	0	1	1	1	1
P38111	P38111	2	2	2	Serine/threonine-protein kinase MEC1	MEC1		1	2	2	2	1	0	1	1	1	0	1	1	1	1	1	1	1	1	1	1	1	0	1	1	1	1	1	1	1	1	0	1	1	0	1	1	0	1	1	1	0	1
P38115	P38115	7	7	7	D-arabinose dehydrogenase [NAD(P)+] heavy chain	ARA1		1	7	7	7	1	1	1	2	3	1	5	2	4	4	2	1	1	1	1	1	3	2	2	0	3	1	0	2	1	3	0	0	0	0	1	1	1	1	2	3	1	5
P38121	P38121	3	3	3	DNA polymerase alpha subunit B	POL12		1	3	3	3	1	1	1	1	2	2	1	1	1	2	2	2	1	2	1	1	1	1	2	0	1	1	1	1	0	1	1	1	1	0	0	1	1	1	1	2	2	1
P38126	P38126	2	2	2	Pachytene checkpoint protein 2	PCH2		1	2	2	2	0	0	0	0	0	0	0	0	1	0	0	0	0	1	0	0	0	0	1	0	0	0	0	0	0	0	0	0	1	0	0	0	0	0	0	0	0	0
P38137	P38137	2	2	2	Peroxisomal-coenzyme A synthetase	PCS60		1	2	2	2	0	0	0	0	2	1	2	1	1	2	1	1	0	1	0	1	1	2	1	0	2	1	1	1	1	1	1	2	0	0	0	0	0	0	0	2	1	2
P38144	P38144	6	6	6	ISWI chromatin-remodeling complex ATPase ISW1	ISW1		1	6	6	6	1	2	1	2	1	1	1	1	1	1	0	1	1	3	0	1	0	0	2	0	0	0	1	0	0	1	2	3	1	0	0	1	2	1	2	1	1	1
P38151	P38151	1	1	1	PAB1-binding protein 2	PBP2		1	1	1	1	0	0	0	0	0	0	0	0	0	0	0	0	0	0	0	1	0	0	1	0	1	1	1	1	0	1	0	0	1	0	0	0	0	0	0	0	0	0
P38170	P38170	19	19	19	Condensin complex subunit 2	BRN1		1	19	19	19	8	7	9	6	7	6	6	4	5	9	7	6	6	8	10	11	8	7	6	2	9	10	9	7	3	9	9	7	6	0	2	8	7	9	6	7	6	6
P38172	P38172	3	3	3	Uncharacterized protein YBL095W, mitochondrial			1	3	3	3	1	0	0	0	2	2	2	2	2	1	1	1	0	1	1	2	2	1	2	0	1	0	2	3	0	2	2	0	2	1	0	1	0	0	0	2	2	2
P38177	P38177	2	2	2	Uncharacterized protein YBL086C			1	2	2	2	2	2	2	2	1	2	2	2	2	1	2	2	1	0	0	1	1	1	2	1	2	2	2	2	1	1	1	1	2	0	1	2	2	2	2	1	2	2
P38182	P38182	3	3	3	Autophagy-related protein 8	ATG8		1	3	3	3	0	1	0	0	0	1	1	0	1	1	2	0	0	2	0	2	2	1	2	1	3	2	1	2	1	1	2	3	1	0	2	0	1	0	0	0	1	1
P38199	P38199	3	3	2	Heterogeneous nuclear rnp K-like protein 2	HEK2		1	3	3	2	0	0	0	0	0	0	1	1	0	0	0	0	0	0	0	0	0	1	0	0	1	0	0	0	0	0	0	2	0	0	0	0	0	0	0	0	0	1
P38204	P38204	2	2	2	RNA polymerase I-specific transcription initiation factor RRN10	RRN10		1	2	2	2	1	2	2	2	1	2	2	1	2	2	2	1	1	1	0	2	2	0	1	1	0	1	1	1	0	0	1	0	0	0	0	1	2	2	2	1	2	2
P38210	P38210	3	3	3	Chromatin structure-remodeling complex protein RSC14	LDB7		1	3	3	3	2	1	2	2	2	2	1	2	2	2	2	1	2	1	2	1	3	2	3	2	1	1	2	3	1	1	2	2	3	1	1	2	1	2	2	2	2	1
P38219	P38219	1	1	1	Obg-like ATPase 1	OLA1		1	1	1	1	0	0	0	0	0	0	0	0	0	0	0	0	0	0	0	1	0	0	0	1	0	0	1	0	0	1	1	0	0	0	0	0	0	0	0	0	0	0
P38230	P38230	3	3	3	Probable quinone oxidoreductase	ZTA1		1	3	3	3	1	1	1	1	2	1	1	1	1	1	1	1	0	1	1	0	0	1	1	0	1	0	0	0	1	0	0	0	0	0	1	1	1	1	1	2	1	1
P38250	P38250	8	8	8	Increased sodium tolerance protein 2	IST2		1	8	8	8	0	0	3	0	1	1	5	0	0	1	1	0	2	4	6	2	2	4	0	4	2	2	1	2	3	1	3	4	2	1	4	0	0	3	0	1	1	5
P38256	P38256	1	1	1	Uncharacterized protein YBR096W			1	1	1	1	0	0	0	1	0	0	0	0	0	0	0	1	0	0	0	0	0	0	0	0	0	0	0	1	0	0	0	0	0	0	0	0	0	0	1	0	0	0
P38271	P38271	19	19	19	Protein OPY1	OPY1		1	19	19	19	11	13	17	11	11	13	13	9	10	11	13	11	6	8	7	10	10	9	11	7	11	9	11	11	5	11	12	10	12	4	8	11	13	17	11	11	13	13
P38276	P38276	2	2	2	UPF0303 protein YBR137W			1	2	2	2	1	1	1	1	2	0	2	0	1	1	2	1	0	1	1	1	1	1	1	0	1	1	1	1	1	1	1	0	1	0	0	1	1	1	1	2	0	2
P38283	P38283	6	6	6	Inner centromere protein-related protein SLI15	SLI15		1	6	6	6	4	3	5	4	3	2	3	2	2	0	2	0	1	3	2	1	0	0	2	1	1	2	1	1	0	2	1	3	1	0	1	4	3	5	4	3	2	3
P38286	P38286	2	2	2	Very-long-chain 3-oxoacyl-CoA reductase	IFA38		1	2	2	2	0	1	0	0	0	0	0	0	0	0	0	1	0	2	1	0	0	0	0	0	0	0	0	0	0	1	0	0	1	0	0	0	1	0	0	0	0	0
P38289	P38289	2	2	2	Exonuclease V, mitochondrial	EXO5		1	2	2	2	0	0	1	0	0	0	0	0	1	0	0	0	0	1	0	0	0	0	0	0	0	0	0	0	0	0	0	0	0	0	0	0	0	1	0	0	0	0
P38314	P38314	3	3	3	Protein SDS24	SDS24		1	3	3	3	0	0	0	1	1	0	3	1	2	2	0	0	1	2	0	0	1	1	0	1	1	1	0	0	1	0	1	1	1	0	1	0	0	0	1	1	0	3
P38321	P38321	15	15	15	Uncharacterized protein YBR225W			1	15	15	15	4	5	6	8	4	4	4	5	4	3	4	4	6	2	3	3	5	5	4	5	5	5	6	6	2	4	6	5	6	3	5	4	5	6	8	4	4	4
P38325	P38325	5	5	5	Mitochondrial outer membrane protein OM14	OM14		1	5	5	5	2	3	2	1	3	4	4	4	2	3	2	2	3	2	0	2	4	2	3	2	3	2	2	2	2	2	2	2	3	3	1	2	3	2	1	3	4	4
P38326	P38326	1	1	1	SWR1-complex protein 5	SWC5		1	1	1	1	0	0	0	0	0	0	1	0	1	0	0	0	1	0	1	0	0	0	1	0	0	0	0	0	0	0	1	1	1	0	0	0	0	0	0	0	0	1
P38330	P38330	3	3	3	Protein RMD9-like, mitochondrial			1	3	3	3	1	1	1	2	0	0	0	1	1	1	0	0	1	0	0	0	0	0	1	0	1	0	1	1	0	1	1	0	1	0	0	1	1	1	2	0	0	0
P38338	P38338	1	1	1	Uncharacterized protein YBR259W			1	1	1	1	0	0	0	0	0	0	0	0	0	0	0	0	0	0	0	1	0	1	0	0	1	1	1	0	0	1	0	1	0	0	0	0	0	0	0	0	0	0
P38351	P38351	6	6	6	RNA polymerase II-associated protein 1	PAF1		1	6	6	6	3	3	4	4	3	3	4	4	4	3	4	4	3	4	3	2	4	4	4	4	3	2	2	4	2	2	4	4	4	0	4	3	3	4	4	3	3	4
P38430	P38430	2	2	2	Uncharacterized deoxyribonuclease YMR262W			1	2	2	2	1	0	1	0	1	1	1	1	1	0	0	2	1	0	0	1	1	1	1	1	1	1	1	1	1	1	1	1	1	1	1	1	0	1	0	1	1	1
P38431	P38431	2	2	2	Eukaryotic translation initiation factor 5	TIF5		1	2	2	2	0	0	0	1	0	0	0	0	0	0	0	0	0	2	0	0	0	0	1	0	0	0	0	1	0	0	0	0	0	0	0	0	0	0	1	0	0	0
P38439	P38439	2	2	2	RNA polymerase-associated protein LEO1	LEO1		1	2	2	2	1	1	1	0	0	0	0	0	1	1	0	0	0	0	2	0	0	0	0	0	0	0	0	0	0	1	0	0	0	0	0	1	1	1	0	0	0	0
P38523	P38523	2	2	2	GrpE protein homolog, mitochondrial	MGE1		1	2	2	2	1	1	1	1	1	1	1	1	1	1	1	1	1	2	1	1	1	1	1	1	1	1	1	1	1	1	1	1	0	0	0	1	1	1	1	1	1	1
P38625	P38625	3	3	3	GMP synthase [glutamine-hydrolyzing]	GUA1		1	3	3	3	0	0	0	0	0	0	0	0	0	0	0	0	0	1	1	0	0	0	0	0	0	1	0	0	0	0	0	0	0	0	0	0	0	0	0	0	0	0
P38627	P38627	3	2	2	CTP synthase 2	URA8		1	3	2	2	1	0	2	2	2	1	2	2	1	1	2	2	1	2	0	2	2	2	2	0	3	2	1	2	0	2	1	2	3	1	0	0	0	1	1	1	0	1
P38630	P38630	2	2	2	Replication factor C subunit 1	RFC1		1	2	2	2	1	1	1	0	1	1	1	2	0	0	1	2	2	1	1	1	1	0	1	0	1	1	0	1	0	1	1	1	1	0	1	1	1	1	0	1	1	1
P38635	P38635	13	13	13	Histidinol-phosphatase	HIS2		1	13	13	13	6	6	9	8	2	2	2	7	1	2	2	4	5	0	1	3	3	1	6	2	2	1	3	5	1	3	2	1	7	3	2	6	6	9	8	2	2	2
P38636	P38636	1	1	1	Metal homeostasis factor ATX1	ATX1		1	1	1	1	0	0	0	1	0	0	0	1	0	0	0	0	0	1	1	0	0	0	1	0	0	0	0	1	0	0	0	0	1	0	0	0	0	0	1	0	0	0
P38688	P38688	2	2	2	Signal recognition particle subunit SRP72	SRP72		1	2	2	2	0	0	0	1	0	0	0	0	0	0	0	0	0	1	0	0	0	0	0	0	0	0	0	0	0	0	0	0	0	0	0	0	0	0	1	0	0	0
P38701	P38701	7	7	7	40S ribosomal protein S20	RPS20		1	7	7	7	4	4	4	5	4	6	4	2	5	3	3	2	3	4	6	4	3	3	4	3	4	2	3	5	5	3	3	4	5	1	4	4	4	4	5	4	6	4
P38707	P38707	3	3	3	Asparagine--tRNA ligase, cytoplasmic	DED81		1	3	3	3	0	0	0	1	0	1	1	1	1	1	1	0	0	1	0	0	1	1	1	0	1	1	1	1	0	0	0	1	1	0	0	0	0	0	1	0	1	1
P38713	P38713	9	9	9	Oxysterol-binding protein homolog 3	OSH3		1	9	9	9	2	2	4	4	1	2	2	3	1	2	2	2	1	2	4	4	2	0	3	1	2	0	3	5	1	2	3	1	6	0	1	2	2	4	4	1	2	2
P38715	P38715	3	3	3	NADPH-dependent aldose reductase GRE3	GRE3		1	3	3	3	0	0	0	0	2	2	2	1	1	1	1	0	0	1	0	0	1	2	2	1	2	1	2	1	0	0	1	1	1	0	0	0	0	0	0	2	2	2
P38720	P38720	1	1	1	6-phosphogluconate dehydrogenase, decarboxylating 1	GND1		1	1	1	1	0	0	0	0	0	0	0	0	0	0	0	0	0	1	0	0	0	0	0	0	0	0	0	0	0	0	0	0	0	0	0	0	0	0	0	0	0	0
P38741	P38741	33	33	33	Meiotic activator RIM4	RIM4		1	33	33	33	6	8	8	11	23	20	23	17	23	22	23	18	17	7	12	21	21	24	20	12	22	24	22	23	11	19	25	23	28	14	15	6	8	8	11	23	20	23
P38742	P38742	5	5	5	Nitrogen permease regulator 3	NPR3		1	5	5	5	1	1	2	2	1	1	0	1	1	2	0	1	0	1	0	3	2	1	0	0	1	1	1	2	0	3	2	2	3	1	2	1	1	2	2	1	1	0
P38744	P38744	7	7	7	Putative pterin-4-alpha-carbinolamine dehydratase	YHL018W		1	7	7	7	4	3	6	5	2	5	4	4	3	2	4	3	3	3	2	3	3	1	2	4	4	2	2	3	3	3	3	1	5	1	2	4	3	6	5	2	5	4
P38755	P38755	2	2	2	Oxysterol-binding protein homolog 7	OSH7		1	2	2	2	0	0	0	0	0	0	2	0	0	1	1	0	0	1	0	0	0	0	0	0	1	0	0	0	0	0	1	0	0	0	0	0	0	0	0	0	0	2
P38758	P38758	2	2	2	Putative oxidoreductase TDA3	TDA3		1	2	2	2	1	0	1	0	1	1	1	0	1	1	1	0	0	1	0	0	1	1	0	0	0	0	0	0	0	0	0	0	0	0	0	1	0	1	0	1	1	1
P38764	P38764	5	5	5	26S proteasome regulatory subunit RPN1	RPN1		1	5	5	5	0	0	0	1	0	0	0	1	0	0	0	1	0	0	1	1	1	0	1	0	2	3	2	1	0	2	1	1	1	0	1	0	0	0	1	0	0	0
P38791	P38791	1	1	1	Deoxyhypusine synthase	DYS1		1	1	1	1	0	0	0	0	1	0	0	0	0	0	0	0	0	1	0	0	0	0	0	0	1	1	0	0	0	0	0	0	0	0	0	0	0	0	0	1	0	0
P38793	P38793	5	5	5	tRNA (guanine(37)-N1)-methyltransferase	TRM5		1	5	5	5	4	4	4	2	3	3	2	1	4	2	1	1	2	1	0	2	3	1	0	1	2	2	2	1	0	2	2	0	2	0	1	4	4	4	2	3	3	2
P38804	P38804	1	1	1	Restriction of telomere capping protein 3	RTC3		1	1	1	1	0	0	0	0	0	0	0	0	0	0	0	0	0	1	1	0	0	0	0	0	0	0	0	0	0	0	0	0	0	0	0	0	0	0	0	0	0	0
P38809;Q05518	P38809	15;1	15;1	15;1	Uncharacterized protein YHR097C	YHR097C		2	15	15	15	5	5	9	13	6	4	12	11	4	4	6	7	6	7	9	5	7	8	9	4	4	5	5	6	4	5	5	8	7	3	5	5	5	9	13	6	4	12
P38811	P38811	5	5	5	Transcription-associated protein 1	TRA1		1	5	5	5	2	1	1	2	1	2	2	0	1	1	1	0	1	3	0	2	1	1	0	0	1	1	1	0	0	1	2	1	1	0	1	2	1	1	2	1	2	2
P38816	P38816	2	2	1	Thioredoxin reductase 2, mitochondrial	TRR2		1	2	2	1	0	0	1	0	1	0	0	1	0	0	0	0	0	1	1	1	0	0	1	0	1	1	1	1	0	1	1	0	1	1	0	0	0	1	0	1	0	0
P38817	P38817	3	3	3	ADP-ribosylation factor-binding protein GGA2	GGA2		1	3	3	3	2	3	1	1	1	2	1	1	2	1	1	1	0	1	0	2	2	1	1	0	2	0	2	1	0	1	0	0	0	0	0	2	3	1	1	1	2	1
P38821	P38821	4	4	4	Aspartyl aminopeptidase 4	APE4		1	4	4	4	0	1	2	0	1	3	2	0	1	0	1	0	0	1	0	0	0	0	0	0	1	1	0	1	0	0	0	0	0	0	0	0	1	2	0	1	3	2
P38827	P38827	3	3	3	Histone-lysine N-methyltransferase, H3 lysine-4 specific	SET1		1	3	3	3	0	0	1	1	0	0	0	1	0	0	0	2	0	1	2	1	0	0	3	0	1	0	2	2	1	1	2	2	1	0	1	0	0	1	1	0	0	0
P38836	P38836	7	7	7	Putative metallocarboxypeptidase ECM14	ECM14		1	7	7	7	5	5	4	4	4	5	5	4	5	6	5	4	4	2	3	7	6	2	4	3	5	4	5	4	2	6	5	5	5	3	4	5	5	4	4	4	5	5
P38840	P38840	2	2	2	Aromatic amino acid aminotransferase 2	ARO9		1	2	2	2	0	0	0	1	0	0	1	1	1	1	0	1	1	2	0	0	0	1	1	0	1	1	0	1	1	0	1	1	1	0	1	0	0	0	1	0	0	1
P38862	P38862	1	1	1	Ubiquitin-like modifier-activating enzyme ATG7	ATG7		1	1	1	1	0	1	0	0	1	1	0	0	0	0	1	0	0	0	1	1	1	0	1	0	1	0	1	1	0	1	0	1	0	0	0	0	1	0	0	1	1	0
P38871	P38871	2	2	2	Sporulation-specific protein 1	SSP1		1	2	2	2	0	0	0	1	0	0	0	1	0	0	0	1	0	0	0	0	0	0	1	1	0	0	0	1	1	2	2	2	2	0	0	0	0	0	1	0	0	0
P38879	P38879	7	7	7	Nascent polypeptide-associated complex subunit alpha	EGD2		1	7	7	7	4	1	3	4	3	1	2	3	2	2	2	2	0	2	4	1	1	1	6	1	0	0	2	5	0	0	2	1	4	0	1	4	1	3	4	3	1	2
P38884	P38884	1	1	1	Altered inheritance of mitochondria protein 18, mitochondrial	AIM18		1	1	1	1	1	1	1	1	1	1	1	1	1	1	1	1	1	1	1	1	1	1	1	1	1	1	1	1	1	1	1	1	1	0	1	1	1	1	1	1	1	1
P38886	P38886	1	1	1	26S proteasome regulatory subunit RPN10	RPN10		1	1	1	1	0	0	0	0	0	0	0	0	0	0	1	0	0	0	0	0	0	0	0	0	1	0	0	0	1	1	1	1	0	0	0	0	0	0	0	0	0	0
P38887	P38887	16	16	16	Uncharacterized protein YHR202W	YHR202W		1	16	16	16	1	1	1	2	2	4	6	6	7	6	4	5	2	2	0	10	7	4	9	4	9	10	8	12	1	9	11	7	13	2	3	1	1	1	2	2	4	6
P38890	P38890	4	4	4	Putative protein lysine methyltransferase SET5	SET5		1	4	4	4	0	0	1	2	0	0	0	2	0	0	0	1	1	0	0	0	0	0	1	0	0	0	0	4	0	0	0	0	4	0	0	0	0	1	2	0	0	0
P38891	P38891	1	1	1	Branched-chain-amino-acid aminotransferase, mitochondrial	BAT1		1	1	1	1	1	0	0	0	0	0	1	0	1	1	1	0	0	0	0	0	0	0	0	0	0	1	0	0	0	0	0	0	0	0	0	1	0	0	0	0	0	1
P38904	P38904	14	14	14	Protein SPP41	SPP41		1	14	14	14	5	3	6	3	4	3	4	4	7	6	3	2	3	7	8	6	3	2	3	1	5	3	3	3	1	7	2	4	2	0	1	5	3	6	3	4	3	4
P38910	P38910	3	3	3	10 kDa heat shock protein, mitochondrial	HSP10		1	3	3	3	3	2	3	2	1	2	1	3	2	1	1	2	0	0	2	1	1	1	1	0	0	0	1	1	1	0	2	1	1	0	0	3	2	3	2	1	2	1
P38911	P38911	1	1	1	FK506-binding nuclear protein	FPR3		1	1	1	1	1	1	1	0	1	1	1	0	1	1	1	0	1	0	1	1	1	1	0	1	1	1	1	1	0	1	1	1	0	0	1	1	1	1	0	1	1	1
P38912	P38912	2	2	2	Eukaryotic translation initiation factor 1A	TIF11		1	2	2	2	1	0	0	0	0	1	0	0	0	0	0	0	0	1	1	1	0	0	1	0	0	0	0	0	0	0	1	1	1	0	0	1	0	0	0	0	1	0
P38934	P38934	4	4	4	Nuclear segregation protein BFR1	BFR1		1	4	4	4	0	0	0	1	0	0	0	2	0	0	0	1	1	0	2	0	0	0	2	0	0	0	0	3	0	0	0	0	2	0	0	0	0	0	1	0	0	0
P38970	P38970	7	7	7	Serine/threonine-protein kinase HAL5	HAL5		1	7	7	7	3	2	2	7	1	1	1	3	1	1	0	5	1	1	0	1	0	0	5	1	0	0	0	5	0	1	0	0	3	0	1	3	2	2	7	1	1	1
P38989	P38989	5	5	5	Structural maintenance of chromosomes protein 2	SMC2		1	5	5	5	1	1	1	1	1	0	1	1	0	0	0	2	1	1	1	3	0	0	2	0	0	0	1	2	0	2	2	2	3	0	0	1	1	1	1	1	0	1
P38991	P38991	1	1	1	Spindle assembly checkpoint kinase	IPL1		1	1	1	1	0	0	1	0	0	0	0	0	0	1	0	0	0	1	0	0	0	0	0	1	0	0	0	0	0	0	0	0	0	0	0	0	0	1	0	0	0	0
P38993	P38993	5	5	5	Iron transport multicopper oxidase FET3	FET3		1	5	5	5	2	4	4	4	2	4	3	3	2	3	3	3	1	1	0	2	3	2	2	2	2	3	1	3	2	2	3	2	3	0	2	2	4	4	4	2	4	3
P38994	P38994	13	13	13	Probable phosphatidylinositol 4-phosphate 5-kinase MSS4	MSS4		1	13	13	13	5	6	5	7	6	7	7	4	7	10	10	3	8	6	3	8	8	6	7	5	7	7	7	9	3	8	10	9	9	1	6	5	6	5	7	6	7	7
P38998	P38998	1	1	1	Saccharopine dehydrogenase [NAD(+), L-lysine-forming]	LYS1		1	1	1	1	1	1	0	1	1	1	1	1	1	1	0	0	0	0	0	0	0	0	0	0	0	1	0	0	0	0	0	0	0	0	0	1	1	0	1	1	1	1
P38999	P38999	1	1	1	Saccharopine dehydrogenase [NADP(+), L-glutamate-forming]	LYS9		1	1	1	1	0	0	0	0	0	0	0	0	0	0	0	0	0	1	0	0	0	0	0	0	0	0	0	0	0	0	0	0	0	0	0	0	0	0	0	0	0	0
P39001	P39001	4	4	4	Transcriptional regulatory protein UME6	UME6		1	4	4	4	2	2	2	1	2	2	2	2	2	2	2	1	1	2	3	2	2	2	3	1	2	1	2	2	1	1	2	2	0	0	1	2	2	2	1	2	2	2
P39006	P39006	2	2	2	Phosphatidylserine decarboxylase proenzyme 1, mitochondrial;Phosphatidylserine decarboxylase 1 beta chain;Phosphatidylserine decarboxylase 1 alpha chain	PSD1		1	2	2	2	1	0	1	0	1	1	1	0	0	1	0	0	0	2	0	1	0	0	0	0	1	0	1	0	0	1	0	1	0	0	0	1	0	1	0	1	1	1
P39015	P39015	6	6	6	Suppressor protein STM1	STM1		1	6	6	6	1	1	1	2	1	1	0	1	1	1	1	1	2	3	1	2	1	1	5	1	1	1	2	3	1	1	1	1	2	1	1	1	1	1	2	1	1	0
P39016	P39016	4	4	4	Suppressor protein MPT5	MPT5		1	4	4	4	1	1	1	1	1	1	2	1	1	1	1	1	2	4	1	2	2	1	0	1	3	2	3	2	1	3	3	3	2	0	2	1	1	1	1	1	1	2
P39073	P39073	5	5	5	Meiotic mRNA stability protein kinase SSN3	SSN3		1	5	5	5	2	2	2	4	2	2	1	2	2	2	1	1	1	2	0	2	1	1	1	2	2	1	1	2	2	1	2	1	2	1	2	2	2	2	4	2	2	1
P39081	P39081	1	1	1	Protein PCF11	PCF11		1	1	1	1	0	0	0	0	0	0	0	0	0	0	0	0	0	0	1	0	0	0	1	0	0	0	0	0	0	0	0	0	1	0	0	0	0	0	0	0	0	0
P39083	P39083	2	2	2	Rho-type GTPase-activating protein 1	RGA1		1	2	2	2	0	0	0	0	0	0	0	0	0	1	0	0	0	0	0	0	1	0	1	1	1	0	0	1	1	1	0	1	0	0	0	0	0	0	0	0	0	0
P39106	P39106	1	1	1	Alpha-1,3-mannosyltransferase MNN1	MNN1		1	1	1	1	0	0	0	1	0	0	0	1	0	0	0	1	0	0	0	0	0	0	1	0	0	0	0	1	0	0	0	0	1	0	0	0	0	0	1	0	0	0
P39107	P39107	1	1	1	Mannan polymerase complexes subunit MNN9	MNN9		1	1	1	1	0	0	0	0	0	0	0	1	0	0	0	1	0	0	0	0	0	0	1	0	0	0	0	1	0	0	0	0	0	0	0	0	0	0	0	0	0	0
P39113	P39113	2	2	2	Regulatory protein CAT8	CAT8		1	2	2	2	1	0	1	1	1	1	1	1	1	0	0	1	0	1	2	1	0	0	2	0	1	0	1	0	0	2	1	1	1	0	1	1	0	1	1	1	1	1
P39518	P39518	2	2	2	Long-chain-fatty-acid--CoA ligase 2	FAA2		1	2	2	2	0	0	0	0	0	0	0	0	0	0	0	0	0	2	0	0	0	0	0	0	0	0	0	0	0	0	0	0	0	0	0	0	0	0	0	0	0	0
P39521	P39521	8	8	8	Pre-rRNA-processing protein FHL1	FHL1		1	8	8	8	7	1	4	2	3	1	2	1	5	1	2	1	3	3	3	4	3	3	4	0	4	3	3	2	0	4	3	3	1	0	1	7	1	4	2	3	1	2
P39522	P39522	2	2	2	Dihydroxy-acid dehydratase, mitochondrial	ILV3		1	2	2	2	0	0	0	0	0	0	0	0	0	0	0	0	0	2	0	0	0	0	0	0	0	0	0	0	0	0	0	0	0	0	0	0	0	0	0	0	0	0
P39676	P39676	4	4	4	Flavohemoprotein	YHB1		1	4	4	4	1	0	0	1	2	2	3	2	1	1	1	2	1	2	0	1	0	0	2	0	0	0	0	2	0	0	1	0	1	0	0	1	0	0	1	2	2	3
P39705	P39705	10	10	10	Nucleoporin NUP60	NUP60		1	10	10	10	2	3	4	4	5	2	1	4	2	0	0	4	3	2	6	4	2	1	6	1	1	3	3	5	0	0	1	1	4	0	1	2	3	4	4	5	2	1
P39708;P07262	P39708;P07262	2;1	2;1	2;1	NADP-specific glutamate dehydrogenase 2;NADP-specific glutamate dehydrogenase 1	GDH3;GDH1	;	2	2	2	2	0	0	0	0	1	1	1	0	1	1	1	0	0	0	0	0	1	1	1	0	1	1	1	0	1	0	1	1	0	0	1	0	0	0	0	1	1	1
P39713	P39713	3	3	3	Probable diacetyl reductase [(R)-acetoin forming] 2	BDH2		1	3	3	3	2	1	1	1	0	1	0	1	1	0	0	0	1	0	0	0	0	0	1	1	1	0	0	1	1	0	0	0	1	0	1	2	1	1	1	0	1	0
P39714	P39714	9	9	9	(R,R)-butanediol dehydrogenase	BDH1		1	9	9	9	4	3	3	3	4	5	4	4	3	3	1	3	4	1	1	3	3	1	7	2	4	1	2	3	0	2	1	0	5	2	0	4	3	3	3	4	5	4
P39715	P39715	2	2	2	Shuttling pre-60S factor ECM1	ECM1		1	2	2	2	0	0	0	0	0	0	0	0	0	0	0	0	0	1	1	0	0	0	0	0	0	0	0	0	0	0	0	0	0	0	0	0	0	0	0	0	0	0
P39720	P39720	4	4	4	Oleate-activated transcription factor 1	OAF1		1	4	4	4	1	1	1	0	1	1	0	0	2	1	0	2	1	0	2	2	1	0	2	0	2	2	1	1	0	2	2	1	2	0	0	1	1	1	0	1	1	0
P39721	P39721	1	1	1	Protein AIM2	AIM2		1	1	1	1	0	1	0	0	0	0	1	0	0	1	0	1	0	0	0	0	1	0	1	0	1	0	0	1	0	1	1	1	1	0	0	0	1	0	0	0	0	1
P39727	P39727	12	12	12	ER-derived vesicles protein ERV46	ERV46		1	12	12	12	10	9	10	8	5	8	7	5	6	5	7	3	7	6	2	7	7	5	5	4	5	6	6	5	4	6	5	4	7	4	4	10	9	10	8	5	8	7
P39734	P39734	1	1	1	Protein HPH2	FRT2		1	1	1	1	0	0	0	0	0	0	0	0	0	0	0	0	0	0	1	0	0	0	0	0	0	0	0	1	1	0	0	0	0	0	1	0	0	0	0	0	0	0
P39744	P39744	2	2	2	Nucleolar complex protein 2	NOC2		1	2	2	2	0	0	0	0	0	0	0	0	0	0	0	0	1	1	1	0	0	0	0	0	0	0	1	0	1	0	0	0	0	0	0	0	0	0	0	0	0	0
P39875	P39875	2	2	2	Exodeoxyribonuclease 1	EXO1		1	2	2	2	0	0	0	0	0	0	0	0	0	0	0	0	0	0	0	0	0	0	0	0	0	0	0	0	0	0	0	0	2	0	0	0	0	0	0	0	0	0
P39929	P39929	1	1	1	Vacuolar-sorting protein SNF7	SNF7		1	1	1	1	0	0	0	0	0	0	0	0	0	0	0	0	0	0	0	0	0	0	1	0	0	0	0	0	0	0	0	0	0	0	0	0	0	0	0	0	0	0
P39931	P39931	10	10	10	Protein SSP120	SSP120		1	10	10	10	7	6	5	3	8	6	7	4	7	7	5	3	2	1	0	7	4	5	6	2	7	7	4	5	2	7	5	6	7	2	2	7	6	5	3	8	6	7
P39933	P39933	10	10	10	Transcription factor IIIA	PZF1		1	10	10	10	3	4	5	5	4	4	4	4	4	4	5	4	4	8	2	5	5	4	5	3	5	5	3	7	2	5	6	4	7	1	5	3	4	5	5	4	4	4
P39935	P39935	1	1	1	Eukaryotic initiation factor 4F subunit p150	TIF4631		1	1	1	1	0	0	1	1	0	0	0	0	0	0	0	0	1	0	1	1	0	1	0	0	1	0	0	1	1	1	1	1	1	0	0	0	0	1	1	0	0	0
P39938;P39939	P39938;P39939	4;3	4;3	4;3	40S ribosomal protein S26-A;40S ribosomal protein S26-B	RPS26A;RPS26B	;	2	4	4	4	0	0	1	3	0	1	1	2	0	1	1	2	1	1	1	0	1	1	3	1	0	0	0	1	1	0	0	0	1	0	1	0	0	1	3	0	1	1
P39954	P39954	11	11	11	Adenosylhomocysteinase	SAH1		1	11	11	11	2	3	2	3	4	6	9	5	5	6	5	1	3	4	2	5	6	5	4	3	5	5	5	4	2	3	5	5	6	0	4	2	3	2	3	4	6	9
P39956	P39956	2	2	2	DNA damage-responsive transcriptional repressor RPH1	RPH1		1	2	2	2	1	1	1	1	1	1	1	1	1	1	1	1	1	2	1	1	1	1	1	1	1	1	1	1	1	1	1	1	1	1	1	1	1	1	1	1	1	1
P39958	P39958	1	1	1	Rab GDP-dissociation inhibitor	GDI1		1	1	1	1	0	0	0	0	0	1	1	0	0	0	1	0	0	0	0	0	0	0	0	0	0	0	0	0	0	0	0	0	0	0	0	0	0	0	0	0	1	1
P39960	P39960	11	11	11	GTPase-activating protein BEM2/IPL2	BEM2		1	11	11	11	1	0	1	1	0	1	0	0	0	0	0	1	3	5	1	0	0	0	1	0	0	0	1	3	0	0	1	0	3	0	0	1	0	1	1	0	1	0
P39967	P39967	4	4	4	Ubiquitin carboxyl-terminal hydrolase 9	UBP9		1	4	4	4	1	2	2	3	0	0	0	1	0	0	0	2	1	0	0	1	1	0	1	0	0	1	1	2	0	1	1	0	1	0	0	1	2	2	3	0	0	0
P39968	P39968	2	2	2	Vacuolar protein 8	VAC8		1	2	2	2	0	0	0	1	0	0	0	0	0	0	0	0	1	0	0	0	0	0	0	0	0	0	0	0	0	0	0	0	1	0	0	0	0	0	1	0	0	0
P39976	P39976	10	10	10	D-lactate dehydrogenase [cytochrome] 3	DLD3		1	10	10	10	6	5	5	4	9	6	8	5	1	3	6	1	3	2	0	2	1	0	4	1	0	2	1	3	0	1	1	0	2	0	0	6	5	5	4	9	6	8
P39997	P39997	1	1	1	Ectonucleotide pyrophosphatase/phosphodiesterase 2;Alkaline phosphodiesterase 1;Nucleotide pyrophosphatase	NPP2		1	1	1	1	0	0	0	0	0	0	0	0	0	0	0	0	0	0	0	0	0	0	0	0	0	0	0	0	0	1	0	0	0	0	0	0	0	0	0	0	0	0
P40002	P40002	3	3	3	Transcriptional regulator MIT1	MIT1		1	3	3	3	1	1	2	1	1	1	1	0	0	1	3	1	0	0	1	0	0	1	1	0	0	2	0	0	0	0	0	0	0	0	0	1	1	2	1	1	1	1
P40017	P40017	15	15	15	Carnitine O-acetyltransferase YAT2	YAT2		1	15	15	15	3	3	7	5	3	4	7	6	4	5	3	3	6	2	1	6	6	3	7	5	4	5	7	8	2	4	7	5	9	0	4	3	3	7	5	3	4	7
P40020	P40020	3	3	3	Factor interacting with REF2	FIR1		1	3	3	3	0	0	0	0	0	0	0	1	1	0	0	0	1	2	1	1	0	0	1	0	0	0	1	0	0	0	1	0	1	0	0	0	0	0	0	0	0	0
P40021	P40021	1	1	1	Zinc-regulated protein 8	ZRG8		1	1	1	1	0	0	0	0	0	0	0	0	0	0	0	0	0	1	0	0	0	0	0	0	0	0	0	0	0	0	0	0	0	0	0	0	0	0	0	0	0	0
P40024	P40024	3	3	3	ABC transporter ATP-binding protein ARB1	ARB1		1	3	3	3	0	0	0	0	0	1	1	0	0	2	0	0	0	1	0	0	1	1	0	0	1	1	0	0	0	0	0	1	0	0	0	0	0	0	0	0	1	1
P40029	P40029	1	1	1	Peptide methionine sulfoxide reductase	MXR1		1	1	1	1	0	0	0	0	1	0	0	1	1	0	1	0	1	1	0	0	0	0	1	1	1	0	0	0	1	0	0	0	0	0	1	0	0	0	0	1	0	0
P40036	P40036	2	2	2	GLC7-interacting protein 2	GIP2		1	2	2	2	0	0	0	1	0	0	0	0	0	0	0	1	0	0	1	1	0	0	1	0	0	0	0	1	0	0	1	1	1	0	0	0	0	0	1	0	0	0
P40040	P40040	1	1	1	Protein THO1	THO1		1	1	1	1	0	0	0	0	0	0	0	0	0	0	0	0	0	1	0	0	0	0	1	0	0	0	0	0	0	0	0	0	0	0	0	0	0	0	0	0	0	0
P40043	P40043	27	27	27	Respiratory growth induced protein 1	RGI1		1	27	27	27	23	20	24	25	21	19	24	20	21	20	22	18	10	6	13	17	20	21	20	11	15	20	19	19	10	17	18	20	21	8	10	23	20	24	25	21	19	24
148273;148274;148275;148276;148277;148278;148279;148280;148281;148282;148283;148284;148285;148286;148287;148288;148289;148290;148291;148292;148293;148294;148295;148296;148297;148298;148299;148300;148301;148302;148303;148304;148305;148306;148307;148308;148309;148310;148311;148312;148313;148314;148315;148316;148317;148318;148319;148320;148321;148322;148323;148324;148325;148326;148327;148328;148329;…
;360371;360372;360373;360374;360375;360376;360377;360378;360379;360380;360381;360382;360383;360384;360385;360386;360387;360388;360389;360390;360391;360392;360393;360394;360395;360396;360397;360398;360399;360400;360401;360402;360403;360404;360405;360406;360407;360408;360409;360410;360411;360412;360413;360414;360415;360416;360417;360418;360419;360420;360421;360422;360423;360424;360425;360426;360427…	30608;33769;35784;57045;67598;146552;147729;159055;161137;161179;161424;175436;207509;207575;245420;290459;294517;313635;316091;317297;317550;360227;360341;378742;394820;394893;394904	1443;1444	268		10;68	148
P40052	P40052	1	1	1	Uncharacterized protein YER079W	YER079W		1	1	1	1	0	0	0	1	0	0	0	1	0	0	0	1	0	1	1	0	0	0	1	0	0	0	0	1	0	0	0	0	1	0	0	0	0	0	1	0	0	0
P40055	P40055	4	4	4	U3 small nucleolar RNA-associated protein 7	UTP7		1	4	4	4	2	2	2	1	2	1	2	1	1	2	1	2	2	1	2	1	1	1	1	1	1	1	1	1	1	2	1	1	2	0	1	2	2	2	1	2	1	2
P40059	P40059	3	3	3	Transcriptional regulatory protein DOT6	DOT6		1	3	3	3	1	1	3	2	2	2	2	1	3	1	2	2	0	2	0	0	0	1	2	0	1	1	1	3	1	1	2	3	3	0	3	1	1	3	2	2	2	2
P40060	P40060	2	2	2	Ino eighty subunit 5	IES5		1	2	2	2	0	0	0	0	0	0	0	0	0	0	1	0	0	1	0	1	1	0	0	0	0	0	0	0	0	0	1	0	0	0	0	0	0	0	0	0	0	0
P40065	P40065	3	3	3	Monopolin complex subunit MAM1	MAM1		1	3	3	3	1	0	0	0	1	1	0	0	1	1	1	0	0	1	1	1	1	1	3	0	1	1	1	2	0	3	3	3	3	1	1	1	0	0	0	1	1	0
P40069	P40069	2	2	2	Importin subunit beta-4	KAP123		1	2	2	2	0	0	0	0	0	0	0	0	0	0	0	0	0	1	1	0	1	1	0	0	1	1	1	0	1	1	1	1	0	0	0	0	0	0	0	0	0	0
P40075	P40075	2	2	2	Vesicle-associated membrane protein-associated protein SCS2	SCS2		1	2	2	2	2	2	2	2	2	2	2	2	2	2	2	2	1	1	2	2	2	2	2	1	2	2	2	2	1	2	2	2	2	1	1	2	2	2	2	2	2	2
P40078	P40078	2	2	2	Ribosome biogenesis protein NSA2	NSA2		1	2	2	2	0	0	0	0	0	0	1	0	1	0	0	0	0	1	0	0	0	1	0	0	1	1	0	0	0	0	0	0	0	0	0	0	0	0	0	0	0	1
P40079	P40079	1	1	1	U3 small nucleolar ribonucleoprotein protein LCP5	LCP5		1	1	1	1	0	0	0	0	1	1	1	0	1	0	0	0	0	0	0	0	0	0	0	0	1	0	0	0	0	0	1	0	0	0	0	0	0	0	0	1	1	1
P40096	P40096	1	1	1	Negative cofactor 2 complex subunit alpha	BUR6		1	1	1	1	1	0	1	0	1	0	0	0	1	1	1	0	0	0	0	1	0	1	0	0	1	1	1	0	0	1	0	1	0	0	0	1	0	1	0	1	0	0
P40099	P40099	3	3	3	5-formyltetrahydrofolate cyclo-ligase	FAU1		1	3	3	3	2	3	3	2	1	1	2	2	1	2	1	2	1	0	0	0	1	0	2	0	0	0	0	2	0	0	1	0	2	1	0	2	3	3	2	1	1	2
P40151	P40151	2	2	2	DNA-dependent ATPase MGS1	MGS1		1	2	2	2	0	0	0	0	0	0	0	1	0	0	0	1	2	1	1	0	0	0	2	0	1	0	1	0	0	1	0	0	0	0	0	0	0	0	0	0	0	0
P40154	P40154	1	1	1	Ino eighty subunit 2	IES2		1	1	1	1	0	0	0	0	0	0	0	0	0	0	0	0	0	1	0	0	0	0	0	0	0	0	0	0	0	0	0	0	0	0	0	0	0	0	0	0	0	0
P40165	P40165	1	1	1	NAD(P)H-hydrate epimerase			1	1	1	1	0	0	0	0	0	0	0	0	0	0	0	0	0	1	0	0	0	0	0	0	0	0	0	0	0	0	0	0	0	0	0	0	0	0	0	0	0	0
P40185	P40185	4	4	4	Protein MMF1, mitochondrial	MMF1		1	4	4	4	0	0	0	0	1	2	2	0	1	2	2	0	0	2	1	1	1	1	0	1	2	1	0	0	1	0	0	1	0	0	1	0	0	0	0	1	2	2
P40187	P40187	7	7	7	GSY2-interacting protein PIG2	PIG2		1	7	7	7	5	6	6	7	4	4	4	5	4	4	5	3	2	1	0	0	1	1	4	0	0	2	0	3	0	0	0	0	2	0	1	5	6	6	7	4	4	4
P40188	P40188	26	26	26	Respiratory growth induced protein 2	RGI2		1	26	26	26	21	15	21	16	15	16	17	12	13	12	17	13	7	7	10	10	15	12	15	6	9	8	13	13	6	9	8	9	12	2	5	21	15	21	16	15	16	17
P40208	P40208	1	1	1	Glucose-induced degradation protein 8	GID8		1	1	1	1	0	0	0	0	0	0	0	0	0	0	0	0	1	0	0	0	0	0	0	0	0	0	0	1	0	0	0	0	0	0	0	0	0	0	0	0	0	0
P40212;Q12690	P40212;Q12690	4;2	4;2	4;2	60S ribosomal protein L13-B;60S ribosomal protein L13-A	RPL13B;RPL13A	;	2	4	4	4	0	0	0	3	1	0	0	1	0	0	0	2	1	2	4	1	0	0	2	0	1	0	1	0	1	1	0	0	1	0	0	0	0	0	3	1	0	0
P40217	P40217	1	1	1	Eukaryotic translation initiation factor 3 subunit I	TIF34		1	1	1	1	0	0	0	0	0	0	0	0	0	0	0	0	0	1	0	1	0	0	0	0	0	0	0	0	0	0	0	0	0	0	0	0	0	0	0	0	0	0
P40218	P40218	1	1	1	Uncharacterized protein YMR147W			1	1	1	1	0	0	0	0	0	0	0	1	1	0	0	0	0	0	1	0	0	0	1	0	1	0	0	0	0	1	1	1	0	0	0	0	0	0	0	0	0	0
P40302	P40302	4	4	4	Proteasome subunit alpha type-6	PRE5		1	4	4	4	0	1	1	0	0	0	1	0	1	0	0	0	0	2	0	1	0	0	2	0	1	1	2	2	0	1	2	1	1	0	0	0	1	1	0	0	0	1
P40303	P40303	1	1	1	Proteasome subunit alpha type-4	PRE6		1	1	1	1	0	0	0	0	0	0	0	0	0	0	1	0	0	1	0	0	0	0	0	0	0	0	0	0	0	0	0	0	0	0	0	0	0	0	0	0	0	0
P40339	P40339	1	1	1	Replication factor C subunit 4	RFC4		1	1	1	1	0	0	0	0	0	0	0	1	0	0	0	0	0	1	0	0	0	0	1	0	0	0	0	0	0	0	0	0	0	0	0	0	0	0	0	0	0	0
P40340	P40340	2	2	2	Tat-binding homolog 7	YTA7		1	2	2	2	0	0	0	0	0	0	0	0	0	0	0	0	0	1	1	0	0	0	0	0	0	0	0	0	0	0	0	0	0	0	0	0	0	0	0	0	0	0
P40343	P40343	1	1	1	Vacuolar protein sorting-associated protein 27	VPS27		1	1	1	1	0	0	0	0	0	0	0	0	0	0	0	0	0	0	0	0	0	0	0	0	0	0	0	0	0	1	1	0	1	0	0	0	0	0	0	0	0	0
P40345	P40345	3	3	3	Phospholipid:diacylglycerol acyltransferase	LRO1		1	3	3	3	1	1	1	1	0	0	0	0	0	0	0	0	1	2	0	1	0	0	0	0	0	1	0	2	0	1	0	0	0	0	1	1	1	1	1	0	0	0
P40347	P40347	1	1	1	Low molecular weight phosphotyrosine protein phosphatase	LTP1		1	1	1	1	0	0	0	0	0	0	0	0	0	0	0	0	0	0	0	0	0	0	0	0	0	0	0	0	1	0	0	0	0	0	0	0	0	0	0	0	0	0
P40353	P40353	1	1	1	Alcohol O-acetyltransferase 1	ATF1		1	1	1	1	0	0	0	0	0	0	0	0	0	0	0	0	0	0	0	0	0	0	1	0	1	0	0	1	0	0	1	1	1	0	1	0	0	0	0	0	0	0
P40360	P40360	2	2	2	Amino-acid acetyltransferase, mitochondrial	ARG2		1	2	2	2	1	1	0	0	0	1	1	0	1	1	0	0	0	0	0	0	0	0	0	0	0	0	0	0	0	0	0	0	0	0	0	1	1	0	0	0	1	1
P40363	P40363	5	5	5	S-formylglutathione hydrolase			1	5	5	5	2	1	2	2	3	2	3	3	2	2	2	3	3	2	2	2	2	2	3	4	3	2	3	4	4	2	3	2	3	2	4	2	1	2	2	3	2	3
P40364	P40364	2	2	2	Mitochondrial peculiar membrane protein 1	MPM1		1	2	2	2	0	0	0	1	0	0	0	1	0	0	0	1	0	0	1	0	0	0	1	0	0	0	0	1	1	0	0	0	0	0	0	0	0	0	1	0	0	0
P40395	P40395	3	3	3	Guanine nucleotide exchange factor subunit RIC1	RIC1		1	3	3	3	0	0	0	1	0	0	0	1	0	0	0	0	0	2	0	0	0	0	1	0	0	0	0	1	0	0	0	0	1	0	0	0	0	0	1	0	0	0
P40414	P40414	9	9	9	Tropomyosin-2	TPM2		1	9	9	9	0	1	0	0	0	0	0	1	1	2	3	2	3	1	6	8	7	6	9	6	6	7	8	7	4	8	8	7	5	2	4	0	1	0	0	0	0	0
P40453	P40453	1	1	1	Ubiquitin carboxyl-terminal hydrolase 7	UBP7		1	1	1	1	0	0	0	0	0	0	0	0	0	0	0	0	0	1	0	0	0	0	0	0	0	0	0	0	0	0	0	0	0	0	0	0	0	0	0	0	0	0
P40454	P40454	7	7	7	Serine/threonine-protein phosphatase 2A activator 1	RRD1		1	7	7	7	5	5	5	5	4	4	4	3	4	5	6	3	3	2	1	3	4	3	4	1	2	4	3	4	0	5	4	4	4	0	1	5	5	5	5	4	4	4
P40457	P40457	3	3	3	Protein MLP2	MLP2		1	3	3	3	0	0	0	1	0	0	0	0	0	0	0	0	1	2	0	1	1	0	0	0	0	0	0	1	0	0	0	0	1	0	0	0	0	0	1	0	0	0
P40462	P40462	1	1	1	Protein TMA108	TMA108		1	1	1	1	1	1	0	0	1	1	0	0	0	0	0	0	0	0	0	1	0	0	0	0	0	0	0	0	0	1	1	0	0	0	1	1	1	0	0	1	1	0
P40466	P40466	1	1	1	Fork head protein homolog 1	FKH1		1	1	1	1	1	0	1	0	0	0	0	1	0	0	0	0	0	0	1	0	0	0	0	0	0	0	0	0	0	0	0	0	0	0	0	1	0	1	0	0	0	0
P40467	P40467	1	1	1	Activator of stress genes 1	ASG1		1	1	1	1	1	1	0	0	1	0	1	0	1	0	0	0	0	0	1	1	1	1	1	0	1	1	0	1	0	1	1	1	1	0	0	1	1	0	0	1	0	1
P40473	P40473	5	5	5	Transcriptional activator POG1	POG1		1	5	5	5	3	2	2	2	2	2	1	2	2	2	2	2	1	1	1	2	2	1	3	0	1	2	2	2	0	2	1	2	2	0	1	3	2	2	2	2	2	1
P40477	P40477	1	1	1	Nucleoporin NUP159	NUP159		1	1	1	1	0	0	0	0	0	0	0	0	0	0	0	0	0	1	0	0	0	0	0	0	0	0	0	0	0	0	0	0	0	0	0	0	0	0	0	0	0	0
P40489	P40489	1	1	1	Transcriptional repressor XBP1	XBP1		1	1	1	1	1	0	0	0	0	0	0	0	0	0	0	0	0	0	1	0	0	0	0	0	0	0	0	0	0	0	0	0	0	0	0	1	0	0	0	0	0	0
P40492	P40492	3	3	3	Protein FYV10	FYV10		1	3	3	3	1	1	1	2	2	1	2	1	1	1	2	2	1	1	0	1	1	1	2	1	1	1	2	2	1	1	1	1	1	0	1	1	1	1	2	2	1	2
P40495	P40495	1	1	1	Homoisocitrate dehydrogenase, mitochondrial	LYS12		1	1	1	1	0	0	0	1	1	1	1	1	1	1	1	0	0	0	0	0	0	0	0	0	0	1	0	0	0	0	0	0	0	0	0	0	0	0	1	1	1	1
P40506	P40506	4	4	4	Phosphopantothenate--cysteine ligase CAB2	CAB2		1	4	4	4	0	1	1	1	1	2	3	1	0	2	0	0	0	0	1	1	2	0	1	0	1	2	0	1	1	1	2	0	1	0	1	0	1	1	1	1	2	3
P40509	P40509	1	1	1	Coatomer subunit epsilon	SEC28		1	1	1	1	0	0	0	0	0	1	1	0	0	1	0	0	0	0	0	0	0	0	0	0	1	0	0	0	1	0	0	0	0	0	0	0	0	0	0	0	1	1
P40511	P40511	4	4	4	Sporulation-specific protein 22	SPO22		1	4	4	4	0	0	0	0	0	0	0	0	0	0	0	0	0	1	0	3	1	1	0	0	1	2	1	2	0	3	1	1	1	0	0	0	0	0	0	0	0	0
P40522	P40522	1	1	1	Transcription factor VHR1	VHR1		1	1	1	1	1	1	1	1	1	1	1	1	1	1	1	1	1	1	1	1	1	0	1	0	1	0	0	1	0	1	1	1	0	1	0	1	1	1	1	1	1	1
P40525	P40525	7	7	3	60S ribosomal protein L34-B	RPL34B		1	7	7	3	2	2	2	2	2	2	5	3	3	3	6	3	3	3	4	2	3	4	2	1	4	3	2	2	5	2	4	2	4	1	1	2	2	2	2	2	2	5
P40531	P40531	1	1	1	Protein GVP36	GVP36		1	1	1	1	0	0	0	0	0	0	0	0	0	0	0	0	0	0	1	0	0	0	0	0	0	0	0	0	0	0	0	0	0	0	0	0	0	0	0	0	0	0
P40535	P40535	3	3	3	ATF/CREB activator 2	CST6		1	3	3	3	2	1	0	0	0	0	0	0	0	1	0	0	0	2	0	0	0	0	0	0	1	0	0	1	0	0	0	0	0	0	0	2	1	0	0	0	0	0
P40541	P40541	5	5	5	Cohesin subunit SCC3	IRR1		1	5	5	5	0	0	0	0	0	0	0	1	1	2	0	2	2	1	1	3	1	0	3	1	0	0	1	2	0	3	2	1	1	0	1	0	0	0	0	0	0	0
P40553	P40553	4	4	4	Peroxiredoxin DOT5	DOT5		1	4	4	4	1	1	2	1	0	2	2	2	2	1	2	1	0	2	2	2	2	1	1	0	2	2	1	2	0	2	2	2	1	0	1	1	1	2	1	0	2	2
P40561	P40561	1	1	1	RNA-binding protein SGN1	SGN1		1	1	1	1	0	0	1	0	0	0	0	1	1	0	0	0	0	0	1	0	1	0	1	0	0	0	0	0	0	0	1	0	0	0	0	0	0	1	0	0	0	0
P40573	P40573	4	4	4	Transcriptional activator of sulfur metabolism MET28	MET28		1	4	4	4	4	2	4	3	4	1	4	2	4	4	3	2	1	1	3	3	2	3	2	1	2	4	3	2	1	3	1	2	2	1	1	4	2	4	3	4	1	4
P40581;P38143	P40581	3;1	3;1	3;1	Peroxiredoxin HYR1	HYR1		2	3	3	3	0	0	0	0	1	1	1	2	1	1	1	0	0	1	2	0	0	1	0	1	1	1	1	0	1	0	1	1	0	0	1	0	0	0	0	1	1	1
P40693	P40693	2	2	2	Ribosome biogenesis protein RLP7	RLP7		1	2	2	2	1	0	1	1	1	1	1	1	1	1	1	1	0	1	1	1	0	1	1	0	1	1	1	1	0	1	1	1	1	0	0	1	0	1	1	1	1	1
P40892	P40892	1	1	1	Putative acetyltransferase YJL218W			1	1	1	1	1	1	1	1	1	0	1	1	1	1	1	1	0	0	1	1	1	0	0	0	0	1	1	0	0	1	1	1	0	0	0	1	1	1	1	1	0	1
P40917	P40917	1	1	1	AP-1-like transcription factor YAP4	CIN5		1	1	1	1	1	0	0	0	0	0	0	0	0	0	0	0	0	0	0	0	0	0	0	0	0	0	0	0	0	0	0	0	0	0	0	1	0	0	0	0	0	0
P40962	P40962	3	3	3	Zinc finger protein RTS2	RTS2		1	3	3	3	0	0	0	0	1	1	0	1	1	0	0	1	1	1	2	1	0	1	1	1	1	1	0	2	1	1	1	1	2	0	1	0	0	0	0	1	1	0
P40965	P40965	7	7	7	MutS protein homolog 4	MSH4		1	7	7	7	0	0	0	0	0	0	0	0	0	0	0	1	0	0	0	6	1	0	2	1	0	2	2	2	0	5	2	1	2	0	0	0	0	0	0	0	0	0
P40968	P40968	2	2	2	Pre-mRNA-processing factor 17	CDC40		1	2	2	2	0	0	1	0	0	0	0	2	0	1	0	1	0	0	0	1	1	0	2	0	0	1	1	2	0	1	1	0	1	0	0	0	0	1	0	0	0	0
P41056	P41056	7	1	1	60S ribosomal protein L33-B	RPL33B		1	7	1	1	2	4	5	5	4	3	3	3	3	2	4	5	0	2	3	1	2	3	4	1	1	3	0	4	2	2	2	1	3	0	0	0	0	1	1	0	1	0
P41057	P41057	5	5	5	40S ribosomal protein S29-A	RPS29A		1	5	5	5	1	2	3	3	3	3	2	4	1	0	2	3	2	2	1	2	2	0	4	2	0	0	2	4	0	3	1	0	3	1	0	1	2	3	3	3	3	2
P41058	P41058	5	5	5	40S ribosomal protein S29-B	RPS29B		1	5	5	5	2	3	3	2	1	4	1	5	1	3	2	4	3	0	1	4	4	1	5	3	1	0	1	5	0	3	3	2	5	2	0	2	3	3	2	1	4	1
P41277	P41277	3	3	3	Glycerol-1-phosphate phosphohydrolase 1	GPP1		1	3	3	3	0	0	0	1	1	1	2	1	0	1	0	1	0	1	0	0	0	0	1	0	0	0	0	0	0	0	0	0	1	0	0	0	0	0	1	1	1	2
P41318	P41318	1	1	1	Target of rapamycin complex subunit LST8	LST8		1	1	1	1	1	0	0	1	0	1	1	1	0	0	0	1	1	1	0	0	0	0	1	1	0	0	0	1	0	0	1	0	1	0	0	1	0	0	1	0	1	1
P41338	P41338	6	6	6	Acetyl-CoA acetyltransferase	ERG10		1	6	6	6	0	0	0	1	0	1	1	1	2	2	2	1	0	2	2	1	0	2	2	0	2	2	1	2	0	1	1	2	1	0	0	0	0	0	1	0	1	1
P41696	P41696	4	4	4	Asparagine-rich zinc finger protein AZF1	AZF1		1	4	4	4	2	1	2	1	1	1	1	1	1	1	1	1	1	0	3	1	1	1	1	1	1	1	1	1	0	2	1	2	0	0	1	2	1	2	1	1	1	1
P41697	P41697	1	1	1	Bud site selection protein 6	BUD6		1	1	1	1	0	0	0	0	0	0	0	0	1	0	0	0	0	0	0	1	0	0	1	0	0	0	1	1	0	1	1	1	1	0	0	0	0	0	0	0	0	0
P41735	P41735	10	10	10	5-demethoxyubiquinone hydroxylase, mitochondrial	CAT5		1	10	10	10	9	7	6	4	7	6	6	3	5	5	4	4	4	2	0	3	4	5	4	2	3	4	4	3	1	3	5	2	4	1	2	9	7	6	4	7	6	6
P41805	P41805	12	12	12	60S ribosomal protein L10	RPL10		1	12	12	12	3	2	0	4	3	3	2	5	3	4	2	3	4	6	4	5	4	2	5	1	4	5	2	4	4	6	3	3	3	0	2	3	2	0	4	3	3	2
P41807	P41807	1	1	1	V-type proton ATPase subunit H	VMA13		1	1	1	1	1	1	1	1	0	0	0	0	1	0	0	1	1	1	0	1	0	0	1	1	1	0	0	1	1	0	0	0	0	0	1	1	1	1	1	0	0	0
P41810	P41810	1	1	1	Coatomer subunit beta	SEC26		1	1	1	1	0	0	0	1	0	0	0	0	0	0	0	0	0	0	0	0	0	0	0	0	0	1	0	1	0	0	1	0	1	0	0	0	0	0	1	0	0	0
P41818	P41818	3	3	3	Protein GLC8	GLC8		1	3	3	3	2	2	2	1	1	1	1	1	1	1	2	1	1	1	3	1	1	1	2	1	1	1	2	0	1	2	1	1	2	0	1	2	2	2	1	1	1	1
P41833	P41833	7	7	7	N6-adenosine-methyltransferase IME4	IME4		1	7	7	7	0	0	0	0	0	1	0	3	0	5	1	1	1	2	0	1	1	1	1	0	0	3	1	6	2	0	3	2	4	0	3	0	0	0	0	0	1	0
P41895	P41895	6	6	6	Transcription initiation factor IIF subunit alpha	TFG1		1	6	6	6	3	4	3	3	3	3	3	3	3	2	3	1	3	3	5	3	3	3	3	2	3	3	2	2	3	3	3	2	3	0	2	3	4	3	3	3	3	3
P41903	P41903	31	31	31	Peroxisomal acyl-coenzyme A thioester hydrolase 1	TES1		1	31	31	31	15	17	23	21	14	15	23	18	13	15	18	16	13	16	11	11	14	17	21	12	15	13	13	19	11	14	14	14	21	12	13	15	17	23	21	14	15	23
P41911	P41911	28	28	27	Glycerol-3-phosphate dehydrogenase [NAD(+)] 2, mitochondrial	GPD2		1	28	28	27	21	23	25	23	19	20	25	21	18	15	16	19	13	9	7	16	16	9	22	11	10	11	16	20	7	16	14	11	23	10	7	21	23	25	23	19	20	25
558;383559;383560;383561;383562;383563;383564;383565;383566;383567;383568;383569;383570;383571;383572;383573;383574;383575;383576;383577;383578;383579;383580;383581;383582;383583;383584;383585;383586;383587;383588;383589;383590;383591;383592;383593;383594;383595;383596;383597;383598;383599;383600;383601;383602;383603;383604;383605;383606;383607;383608;383609;383610;383611;383612;383613;383614;383…	27950;47428;49436;60272;60316;71195;76949;89309;98472;98525;151157;194715;194729;196204;201562;214845;242824;242845;248187;272365;343329;358291;359668;362748;363752;379935;383700;396731		285;286;287			119;307;331
P41920	P41920	7	7	7	Ran-specific GTPase-activating protein 1	YRB1		1	7	7	7	2	1	2	1	2	0	2	4	2	2	1	3	2	1	2	1	1	2	7	0	2	2	2	4	0	1	4	3	4	0	0	2	1	2	1	2	0	2
P41921	P41921	4	4	4	Glutathione reductase	GLR1		1	4	4	4	0	0	0	0	1	1	1	2	1	1	0	0	0	1	0	0	1	1	1	1	0	2	0	1	1	1	1	0	1	0	2	0	0	0	0	1	1	1
P41939	P41939	7	7	7	Isocitrate dehydrogenase [NADP] cytoplasmic	IDP2		1	7	7	7	0	0	0	0	0	1	2	1	2	2	2	0	2	4	0	0	1	2	1	0	2	2	0	0	4	0	0	2	0	0	3	0	0	0	0	0	1	2
P41940	P41940	1	1	1	Mannose-1-phosphate guanyltransferase	PSA1		1	1	1	1	1	1	1	0	1	0	0	0	1	1	0	0	0	0	1	0	0	0	1	0	0	0	0	0	0	0	0	0	0	0	0	1	1	1	0	1	0	0
P42073	P42073	3	3	3	RNA end formation protein 2	REF2		1	3	3	3	0	0	0	0	0	0	0	0	0	0	0	0	0	3	0	0	0	0	0	0	0	0	0	0	0	0	0	0	0	0	0	0	0	0	0	0	0	0
P42839	P42839	4	4	4	Low affinity vacuolar monovalent cation/H(+) antiporter	VNX1		1	4	4	4	0	0	0	1	0	0	1	1	0	0	0	1	1	0	2	1	1	0	1	0	1	0	1	1	1	1	2	0	2	0	1	0	0	0	1	0	0	1
P42844	P42844	8	8	8	Mitochondrial protein import protein ZIM17	ZIM17		1	8	8	8	4	5	8	4	5	5	7	4	5	5	6	1	4	1	2	4	5	5	3	4	4	5	5	4	4	4	5	4	4	5	2	4	5	8	4	5	5	7
P42846	P42846	8	8	8	Protein KRI1	KRI1		1	8	8	8	2	1	1	1	1	1	1	1	2	0	0	2	1	3	3	2	0	0	1	1	1	2	1	1	1	2	1	2	1	0	1	2	1	1	1	1	1	1
P42938	P42938	1	1	1	Probable ATP-dependent kinase TDA10	TDA10		1	1	1	1	0	0	0	0	0	0	0	0	0	0	0	0	0	1	0	0	0	0	0	0	0	0	0	0	0	0	0	0	0	0	0	0	0	0	0	0	0	0
P42944	P42944	2	2	2	Protein GZF3	GZF3		1	2	2	2	2	1	1	1	1	1	1	1	1	1	0	1	0	0	1	1	1	1	1	0	1	1	1	1	0	1	1	1	0	0	0	2	1	1	1	1	1	1
P42949	P42949	1	1	1	Mitochondrial import inner membrane translocase subunit TIM16	PAM16		1	1	1	1	0	0	0	0	0	0	0	0	0	0	0	0	0	1	0	0	0	0	0	0	0	0	0	0	1	0	0	0	0	0	0	0	0	0	0	0	0	0
P43122	P43122	1	1	1	tRNA N6-adenosine threonylcarbamoyltransferase, mitochondrial	QRI7		1	1	1	1	1	1	0	0	0	0	0	0	1	0	1	0	0	0	0	0	0	0	0	0	0	0	0	0	0	0	0	0	0	0	0	1	1	0	0	0	0	0
P43124	P43124	4	4	4	Non-structural maintenance of chromosome element 4	NSE4		1	4	4	4	0	0	1	1	2	1	3	2	2	2	0	1	2	2	3	3	3	0	2	1	2	3	3	2	1	3	3	3	0	0	1	0	0	1	1	2	1	3
P43553	P43553	1	1	1	Magnesium transporter ALR2	ALR2		1	1	1	1	0	0	0	0	0	0	0	1	1	1	0	0	0	0	0	0	0	0	0	0	1	0	0	0	0	0	0	1	1	0	0	0	0	0	0	0	0	0
P43554	P43554	2	2	2	SWI/SNF global transcription activator complex subunit SWP82	SWP82		1	2	2	2	1	1	1	1	1	1	1	0	1	1	1	0	1	2	1	1	1	1	1	1	1	0	0	0	0	1	1	1	0	0	0	1	1	1	1	1	1	1
P43561	P43561	11	11	11	Iron transport multicopper oxidase FET5	FET5		1	11	11	11	8	8	8	8	3	3	6	3	5	5	4	5	4	1	0	7	4	1	6	3	4	6	4	7	3	6	7	6	10	4	5	8	8	8	8	3	3	6
P43563	P43563	2	2	2	CBK1 kinase activator protein MOB2	MOB2		1	2	2	2	1	1	1	1	0	1	1	0	0	0	0	0	0	1	0	0	0	0	0	0	0	0	0	0	0	0	0	0	0	0	0	1	1	1	1	0	1	1
P43567	P43567	8	8	8	Alanine--glyoxylate aminotransferase 1	AGX1		1	8	8	8	1	1	3	2	3	5	6	1	2	6	4	0	2	2	1	3	5	4	2	2	3	3	2	1	3	2	3	2	3	1	3	1	1	3	2	3	5	6
P43574	P43574	1	1	1	Transcriptional regulatory protein GAT1	GAT1		1	1	1	1	0	0	0	0	0	0	0	0	0	0	0	0	0	1	0	0	0	0	0	0	0	0	0	0	0	0	0	0	0	0	0	0	0	0	0	0	0	0
P43579	P43579	1	1	1	Ino eighty subunit 1	IES1		1	1	1	1	0	0	0	0	0	0	0	1	0	0	0	0	0	0	1	0	0	1	0	0	0	0	0	0	0	0	0	0	0	0	1	0	0	0	0	0	0	0
P43588	P43588	3	3	3	Ubiquitin carboxyl-terminal hydrolase RPN11	RPN11		1	3	3	3	1	0	1	1	1	1	1	1	1	1	2	0	1	0	0	1	1	1	1	1	1	1	1	1	1	0	1	1	1	0	1	1	0	1	1	1	1	1
P43589	P43589	6	6	6	Pre-mRNA-splicing factor SAD1	SAD1		1	6	6	6	3	3	2	4	1	1	1	2	1	2	0	1	1	0	0	1	1	0	3	2	2	0	0	4	1	1	0	0	6	0	2	3	3	2	4	1	1	1
P43590	P43590	5	5	5	Uncharacterized peptidase YFR006W	YFR006W		1	5	5	5	0	0	0	2	1	1	0	3	1	0	0	3	2	1	0	1	0	0	4	0	0	0	0	4	0	0	0	0	3	1	2	0	0	0	2	1	1	0
P43593	P43593	2	2	2	Ubiquitin carboxyl-terminal hydrolase 6	UBP6		1	2	2	2	0	1	1	1	1	1	1	1	0	0	1	1	0	1	1	1	1	1	1	0	1	1	0	1	1	0	1	0	1	0	1	0	1	1	1	1	1	1
P43596	P43596	2	2	2	ISWI one complex protein 3	IOC3		1	2	2	2	0	0	0	0	0	0	0	0	0	0	0	0	0	2	0	0	0	0	0	0	0	0	0	0	0	0	0	0	0	0	0	0	0	0	0	0	0	0
P43597	P43597	4	4	4	Uncharacterized protein YFR016C	YFR016C		1	4	4	4	0	1	1	1	1	0	1	1	2	1	1	1	0	1	1	2	1	1	1	0	2	1	1	3	0	2	1	2	3	0	1	0	1	1	1	1	0	1
P43609	P43609	7	7	7	Chromatin structure-remodeling complex protein RSC8	RSC8		1	7	7	7	4	5	4	6	4	4	3	5	3	4	2	5	1	1	6	4	4	3	6	1	4	3	2	5	1	4	3	2	5	1	1	4	5	4	6	4	4	3
P43616	P43616	2	2	2	Cys-Gly metallodipeptidase DUG1	DUG1		1	2	2	2	0	0	0	0	0	0	0	0	0	0	0	1	1	1	1	0	0	0	1	0	0	0	0	0	0	0	0	0	0	0	0	0	0	0	0	0	0	0
P43634	P43634	2	2	2	Activatory protein CHA4	CHA4		1	2	2	2	1	0	2	0	1	1	0	0	1	0	0	0	0	0	1	1	0	0	0	0	0	1	0	0	0	1	0	0	0	0	0	1	0	2	0	1	1	0
P43638	P43638	6	6	6	MAP-homologous protein 1	MHP1		1	6	6	6	2	2	5	4	1	2	2	3	3	2	1	1	2	3	3	2	3	2	2	2	2	3	2	2	1	1	3	3	2	0	1	2	2	5	4	1	2	2
P45976	P45976	1	1	1	Pre-mRNA polyadenylation factor FIP1	FIP1		1	1	1	1	0	0	1	0	1	0	0	0	1	0	1	0	0	0	0	0	1	0	1	0	0	0	1	0	0	1	0	0	0	0	0	0	0	1	0	1	0	0
P45978	P45978	1	1	1	Protein SCD6	SCD6		1	1	1	1	0	0	0	1	0	0	0	1	0	0	0	0	0	0	0	0	0	0	1	0	0	0	0	1	0	0	0	0	1	0	0	0	0	0	1	0	0	0
P46367	P46367	10	10	10	Potassium-activated aldehyde dehydrogenase, mitochondrial	ALD4		1	10	10	10	0	1	1	2	2	2	3	1	3	3	3	1	0	7	4	0	1	0	0	1	1	3	0	1	1	1	2	2	0	0	0	0	1	1	2	2	2	3
P46655	P46655	3	3	3	Glutamate--tRNA ligase, cytoplasmic	GUS1		1	3	3	3	0	1	0	1	1	0	1	1	1	1	2	0	1	0	0	0	2	2	1	1	1	1	0	1	1	0	0	3	2	0	1	0	1	0	1	1	0	1
P46669	P46669	5	5	5	DNA-directed RNA polymerase I subunit RPA43	RPA43		1	5	5	5	1	1	1	3	0	0	0	0	0	0	0	1	1	2	1	0	0	0	2	0	0	0	0	0	1	0	0	0	0	0	0	1	1	1	3	0	0	0
P46672	P46672	1	1	1	tRNA-aminoacylation cofactor ARC1	ARC1		1	1	1	1	0	0	0	0	1	1	1	0	1	0	1	0	0	0	0	1	1	0	0	0	1	1	0	0	0	0	0	0	0	0	0	0	0	0	0	1	1	1
P46675	P46675	3	3	3	Protein STU2	STU2		1	3	3	3	0	0	1	1	1	1	1	0	0	1	0	0	1	2	2	2	1	0	0	0	0	0	0	0	0	0	1	0	1	0	0	0	0	1	1	1	1	1
P46676	P46676	7	7	7	Suppressor of mar1-1 protein	SUM1		1	7	7	7	6	3	5	3	3	3	2	2	2	2	2	2	2	3	6	3	2	3	2	0	3	2	3	2	1	3	2	2	1	0	1	6	3	5	3	3	3	2
P46677	P46677	3	3	3	Transcription initiation factor TFIID subunit 1	TAF1		1	3	3	3	2	0	1	2	0	1	0	0	1	0	2	2	0	1	0	2	1	1	1	0	0	0	1	1	0	2	1	1	1	0	1	2	0	1	2	0	1	0
P46678	P46678	11	11	11	Transcription factor TFIIIB component B	BDP1		1	11	11	11	6	5	9	8	7	8	7	4	5	5	6	4	6	7	7	5	1	2	6	2	5	2	6	2	2	7	5	8	1	1	3	6	5	9	8	7	8	7
P46680	P46680	1	1	1	Actin-interacting protein 1	AIP1		1	1	1	1	0	0	0	0	0	0	0	0	0	0	0	0	0	1	0	0	0	0	0	0	0	0	0	0	0	0	0	0	0	0	0	0	0	0	0	0	0	0
P46784	P46784	10	10	2	40S ribosomal protein S10-B	RPS10B		1	10	10	2	6	5	5	6	5	5	5	7	5	4	5	7	2	7	7	5	5	5	7	2	5	5	5	5	3	4	4	3	6	2	2	6	5	5	6	5	5	5
P46946	P46946	1	1	1	DNA endonuclease SAE2	SAE2		1	1	1	1	1	0	1	0	0	1	0	1	0	0	0	0	0	0	0	0	0	0	0	0	0	0	0	0	0	0	0	0	0	0	0	1	0	1	0	0	1	0
P46954	P46954	1	1	1	Protein SIP4	SIP4		1	1	1	1	0	0	0	0	1	1	1	0	0	1	0	0	0	0	0	0	1	1	1	0	0	0	0	0	0	0	0	0	0	0	0	0	0	0	0	1	1	1
P46959	P46959	1	1	1	tRNA (adenine(58)-N(1))-methyltransferase catalytic subunit TRM61	GCD14		1	1	1	1	0	0	0	0	0	0	0	0	0	0	0	0	0	0	0	0	0	0	0	0	0	0	0	0	0	0	0	0	1	0	0	0	0	0	0	0	0	0
P46969	P46969	1	1	1	Ribulose-phosphate 3-epimerase	RPE1		1	1	1	1	0	0	0	0	1	1	1	1	1	1	1	0	0	0	0	1	1	1	0	0	0	1	0	1	0	1	1	1	0	0	0	0	0	0	0	1	1	1
P47005	P47005	1	1	1	F-box protein DAS1	DAS1		1	1	1	1	0	0	0	0	0	0	0	0	0	0	0	0	0	0	0	0	0	0	1	0	0	0	0	1	0	0	0	0	1	0	0	0	0	0	0	0	0	0
P47006	P47006	7	7	7	DNA-directed RNA polymerase I subunit RPA34	RPA34		1	7	7	7	3	5	5	3	4	3	2	2	4	3	1	1	1	2	4	2	3	1	4	0	2	3	1	3	1	2	3	1	4	0	0	3	5	5	3	4	3	2
P47008	P47008	1	1	1	Phosphatidylinositol transfer protein SFH5	SFH5		1	1	1	1	0	0	0	0	0	0	0	0	0	0	1	0	0	0	0	0	0	0	0	0	0	0	0	0	0	0	0	0	0	0	0	0	0	0	0	0	0	0
P47027	P47027	2	2	2	DNA replication regulator DPB11	DPB11		1	2	2	2	1	1	0	0	1	2	1	0	1	2	1	1	1	0	2	2	2	2	1	1	2	2	1	1	0	2	2	1	1	0	1	1	1	0	0	1	2	1
P47029	P47029	7	7	7	Arrestin-related trafficking adapter 3	ALY2		1	7	7	7	1	3	4	4	2	4	2	3	3	2	2	0	1	1	0	2	2	1	2	1	3	2	3	3	1	3	1	3	2	0	1	1	3	4	4	2	4	2
P47030;P36115	P47030	3;1	3;1	3;1	Protein TAX4	TAX4		2	3	3	3	2	2	2	3	2	2	2	2	2	2	2	1	2	2	0	2	2	2	1	2	2	1	2	2	2	2	2	2	2	2	2	2	2	2	3	2	2	2
P47035	P47035	21	21	21	Nucleolar protein NET1	NET1		1	21	21	21	3	2	4	7	3	4	3	3	4	3	2	4	5	10	12	5	3	2	4	2	3	3	3	2	1	5	1	6	2	0	2	3	2	4	7	3	4	3
P47037	P47037	19	19	19	Structural maintenance of chromosomes protein 3	SMC3		1	19	19	19	0	0	0	1	5	5	3	3	7	6	4	9	6	8	13	15	7	8	7	5	4	11	12	6	3	12	11	9	9	2	5	0	0	0	1	5	5	3
P47079	P47079	1	1	1	T-complex protein 1 subunit theta	CCT8		1	1	1	1	0	0	0	0	0	0	0	0	0	0	0	0	0	0	0	0	0	1	0	0	0	1	0	0	0	0	0	1	0	0	0	0	0	0	0	0	0	0
P47085	P47085	3	3	3	MEMO1 family protein YJR008W			1	3	3	3	1	1	1	1	1	1	2	2	1	1	1	1	2	2	0	1	1	1	2	1	1	1	1	1	1	1	1	1	3	0	1	1	1	1	1	1	1	2
P47089	P47089	2	2	2	Translation machinery-associated protein 22	TMA22		1	2	2	2	0	1	0	0	0	1	0	0	0	0	0	0	0	1	1	1	1	0	0	0	0	0	1	0	0	1	1	0	0	0	0	0	1	0	0	0	1	0
P47093	P47093	1	1	1	U6 snRNA-associated Sm-like protein LSm8	LSM8		1	1	1	1	0	0	0	0	0	0	0	0	0	0	0	0	0	1	0	0	0	0	0	0	0	0	0	0	0	0	0	0	0	0	0	0	0	0	0	0	0	0
P47104	P47104	1	1	1	Regulator of V-ATPase in vacuolar membrane protein 1	RAV1		1	1	1	1	0	0	0	0	0	0	0	0	0	0	0	0	0	0	0	1	0	0	0	0	0	0	0	0	0	0	0	0	1	0	0	0	0	0	0	0	0	0
P47110	P47110	1	1	1	DNA polymerase delta subunit 3	POL32		1	1	1	1	0	0	0	0	0	1	0	0	0	0	1	0	0	0	0	0	0	0	0	0	0	0	0	0	0	0	0	0	0	0	0	0	0	0	0	0	1	0
P47116	P47116	1	1	1	Serine/threonine-protein kinase PTK2/STK2	PTK2		1	1	1	1	1	1	0	0	1	0	0	0	1	0	0	0	1	1	0	1	0	0	1	0	0	0	0	0	0	0	0	0	1	0	0	1	1	0	0	1	0	0
P47124	P47124	1	1	1	Putative glycosyltransferase HOC1	HOC1		1	1	1	1	0	0	0	0	0	1	0	0	0	0	0	0	1	1	0	0	0	0	0	0	0	0	0	0	0	0	0	0	0	0	0	0	0	0	0	0	1	0
P47128	P47128	8	8	8	Chromatin modification-related protein EAF6	EAF6		1	8	8	8	3	3	3	5	3	3	4	4	3	3	4	4	2	4	5	2	3	4	4	3	4	3	3	4	3	2	3	3	5	1	3	3	3	3	5	3	3	4
P47134	P47134	10	10	10	Protein BIR1	BIR1		1	10	10	10	7	3	8	7	4	4	4	3	3	1	2	1	3	4	4	1	1	0	3	1	2	1	1	1	1	1	2	1	2	0	0	7	3	8	7	4	4	4
P47136	P47136	2	2	2	Bud site selection protein 4	BUD4		1	2	2	2	0	0	0	1	0	0	0	1	0	0	0	0	0	0	1	0	0	0	1	0	0	0	0	0	0	0	0	0	0	0	0	0	0	0	1	0	0	0
P47143	P47143	3	3	3	Adenosine kinase	ADO1		1	3	3	3	0	0	1	1	1	1	2	1	1	1	1	0	0	2	1	0	1	1	1	0	1	1	0	1	1	1	1	1	1	0	1	0	0	1	1	1	1	2
P47165	P47165	2	2	2	Xanthine phosphoribosyltransferase 1	XPT1		1	2	2	2	0	0	0	0	1	1	1	1	1	1	1	0	0	1	0	1	1	1	0	0	1	1	1	0	0	0	1	1	0	0	0	0	0	0	0	1	1	1
P47176	P47176	1	1	1	Branched-chain-amino-acid aminotransferase, cytosolic	BAT2		1	1	1	1	0	0	0	0	1	1	0	0	1	0	0	0	0	0	0	0	0	0	0	0	0	1	1	0	0	0	0	0	0	0	0	0	0	0	0	1	1	0
P48015	P48015	2	2	2	Aminomethyltransferase, mitochondrial	GCV1		1	2	2	2	0	0	0	0	2	2	2	1	2	2	2	0	0	1	0	1	1	2	0	1	2	2	2	1	2	2	1	2	1	0	2	0	0	0	0	2	2	2
P48164	P48164	17	5	5	40S ribosomal protein S7-B	RPS7B		1	17	5	5	8	6	7	7	6	6	7	5	10	7	6	4	6	11	10	6	6	6	9	6	7	6	7	6	7	9	7	4	6	1	2	3	2	2	1	2	2	2
P48231	P48231	2	2	2	Tricalbin-2	TCB2		1	2	2	2	0	0	0	0	0	0	0	0	0	0	0	0	0	2	0	0	0	0	0	0	0	0	0	0	0	0	0	0	0	0	0	0	0	0	0	0	0	0
P48237	P48237	2	2	2	Mitochondrial group I intron splicing factor CCM1	CCM1		1	2	2	2	0	1	1	0	0	0	1	1	1	1	1	0	0	0	0	1	2	2	0	0	1	2	0	1	1	1	2	1	0	0	0	0	1	1	0	0	0	1
P48412	P48412	1	1	1	Nonsense-mediated mRNA decay protein 3	UPF3		1	1	1	1	0	0	1	1	0	0	0	0	0	0	0	0	0	0	1	0	0	0	0	1	0	0	0	0	1	0	1	1	1	0	1	0	0	1	1	0	0	0
P48524	P48524	2	2	2	Ubiquitin ligase-binding protein BUL1	BUL1		1	2	2	2	0	0	0	2	0	0	0	0	0	0	0	1	0	0	0	0	0	0	0	0	0	0	0	1	0	0	0	0	1	0	0	0	0	0	2	0	0	0
P48526	P48526	4	4	4	Isoleucine--tRNA ligase, mitochondrial	ISM1		1	4	4	4	2	4	2	1	2	2	1	1	1	1	0	1	2	0	0	2	0	0	1	0	0	1	0	1	0	0	0	0	1	0	0	2	4	2	1	2	2	1
P48570;Q12122	P48570;Q12122	3;3	3;3	3;3	Homocitrate synthase, cytosolic isozyme;Homocitrate synthase, mitochondrial	LYS20;LYS21	;	2	3	3	3	0	0	1	0	0	0	2	0	0	2	2	0	0	1	0	0	0	0	1	0	1	1	0	0	0	0	0	1	1	0	0	0	0	1	0	0	0	2
P48581	P48581	2	2	2	DNA damage checkpoint control protein RAD17	RAD17		1	2	2	2	0	0	0	0	0	0	0	0	1	1	0	0	1	1	0	1	1	1	1	1	0	1	1	1	0	1	1	1	1	0	1	0	0	0	0	0	0	0
P48589	P48589	9	9	9	40S ribosomal protein S12	RPS12		1	9	9	9	2	0	0	3	2	0	1	5	2	0	1	4	3	1	4	1	1	0	4	2	2	2	1	5	4	1	2	1	5	1	0	2	0	0	3	2	0	1
P48836	P48836	1	1	1	V-type proton ATPase subunit G	VMA10		1	1	1	1	1	1	0	0	1	0	0	0	0	1	0	1	1	0	1	0	0	1	1	0	1	0	1	1	1	1	0	1	0	0	0	1	1	0	0	1	0	0
P49017	P49017	2	2	2	2-methoxy-6-polyprenyl-1,4-benzoquinol methylase, mitochondrial	COQ5		1	2	2	2	0	0	0	0	0	0	0	0	0	1	0	0	0	0	0	1	1	1	0	1	1	1	1	1	1	1	1	1	1	0	1	0	0	0	0	0	0	0
P49089	P49089	30	15	16	Asparagine synthetase [glutamine-hydrolyzing] 1	ASN1		1	30	15	16	22	20	26	19	11	8	10	10	8	5	2	9	4	7	2	8	6	2	11	0	5	6	4	13	0	7	4	3	13	4	0	10	9	15	7	2	1	3
P49090	P49090	38	38	24	Asparagine synthetase [glutamine-hydrolyzing] 2	ASN2		1	38	38	24	29	26	28	31	16	14	14	15	13	9	7	16	12	6	3	17	11	4	18	4	10	10	8	21	2	13	9	5	22	6	4	29	26	28	31	16	14	14
P49095	P49095	21	21	21	Glycine dehydrogenase (decarboxylating), mitochondrial	GCV2		1	21	21	21	6	12	11	10	9	7	6	8	8	6	4	7	5	4	6	9	10	6	8	2	6	8	7	13	1	10	10	8	12	7	4	6	12	11	10	9	7	6
P49166	P49166	9	9	4	60S ribosomal protein L37-A	RPL37A		1	9	9	4	5	5	5	5	4	5	4	6	5	4	3	6	5	3	3	5	6	3	6	3	5	4	5	5	4	4	5	5	5	5	3	5	5	5	5	4	5	4
P49167	P49167	10	10	10	60S ribosomal protein L38	RPL38		1	10	10	10	4	4	4	5	5	4	3	6	5	3	3	5	1	5	3	5	4	3	8	1	4	2	4	6	1	3	4	2	3	0	1	4	4	4	5	5	4	3
P49334	P49334	2	2	2	Mitochondrial import receptor subunit TOM22	TOM22		1	2	2	2	0	0	0	1	0	0	0	1	0	0	0	1	0	1	0	0	0	0	1	0	0	0	0	0	2	0	0	0	0	0	0	0	0	0	1	0	0	0
P49723	P49723	2	2	2	Ribonucleoside-diphosphate reductase small chain 2	RNR4		1	2	2	2	0	0	0	0	0	0	0	2	0	0	0	0	1	0	1	0	0	0	2	0	0	0	0	2	0	0	0	0	0	1	0	0	0	0	0	0	0	0
P50089	P50089	22	22	22	Uncharacterized protein YGR237C			1	22	22	22	6	7	6	10	6	6	6	9	5	5	6	9	4	12	5	6	6	5	10	5	6	7	5	10	4	5	6	8	8	6	5	6	7	6	10	6	6	6
P50102	P50102	7	7	7	Ubiquitin carboxyl-terminal hydrolase 8	UBP8		1	7	7	7	5	3	3	2	2	2	2	3	2	2	2	3	1	1	0	3	2	1	3	1	2	2	2	4	0	2	2	2	2	0	1	5	3	3	2	2	2	2
P50105	P50105	1	1	1	Transcription initiation factor TFIID subunit 4	TAF4		1	1	1	1	0	0	1	0	1	0	0	1	0	1	1	1	0	1	1	1	0	0	1	1	0	1	1	1	1	1	0	1	1	0	1	0	0	1	0	1	0	0
P50106	P50106	1	1	1	DNA-directed RNA polymerase I subunit RPA14	RPA14		1	1	1	1	1	1	1	1	1	1	1	0	1	1	1	0	0	1	1	1	1	0	1	0	1	1	1	0	1	1	1	1	0	0	0	1	1	1	1	1	1	1
P50107	P50107	7	7	7	Lactoylglutathione lyase	GLO1		1	7	7	7	4	3	3	1	5	4	5	2	4	4	3	2	4	2	0	4	4	3	3	4	3	4	4	2	2	3	4	3	3	2	2	4	3	3	1	5	4	5
P50109	P50109	10	10	10	Protein PSP2	PSP2		1	10	10	10	1	1	3	4	1	2	5	2	2	3	4	2	2	7	6	3	3	3	1	1	3	4	3	3	3	3	4	3	4	2	1	1	1	3	4	1	2	5
P50111	P50111	5	5	5	Protein ZDS1	ZDS1		1	5	5	5	1	1	1	2	1	1	1	1	2	0	1	2	2	3	2	2	2	1	1	2	2	1	2	2	2	2	2	2	2	0	2	1	1	1	2	1	1	1
P50263	P50263	4	4	4	Protein SIP18	SIP18		1	4	4	4	3	1	3	2	2	2	2	1	2	3	0	2	1	3	3	1	0	1	3	1	0	1	1	0	0	1	1	0	1	0	1	3	1	3	2	2	2	2
P50623	P50623	22	22	22	SUMO-conjugating enzyme UBC9	UBC9		1	22	22	22	16	14	13	18	10	10	10	17	12	10	8	16	13	15	12	11	11	8	19	8	10	13	11	18	4	14	13	9	17	8	9	16	14	13	18	10	10	10
2324;372325;372326;372327;372328;372329;372330;372331;372332;372333;372334;372335;372336;372337;372338;372339;372340;372341;372342;372343;372344;372345;372346;372347;372348;372349;372350;372351;372352;372353;372354;372355;372356;372357;372358;372359;372360;372361;372362;372363;372364;372365;372366;372367;372368;372369;372370;372371;372372;372373;372374;372375;372376;372377;372378;372379;372380;37…	2443;33588;33615;46450;47216;63436;63469;170972;170992;170994;185505;185567;246976;246984;246985;304281;365380;365406;369217;370727;385786;385795	1687;1688;1689;1690;1691;1692;1693;1694;1695;1696;1697;1698;1699;1700;1701	334		14;15;27;30;31;40;48;71;74;76;141;146;147;153;157	36
P50947	P50947	4	4	4	Transcriptional regulatory protein PHO23	PHO23		1	4	4	4	4	3	4	4	2	3	2	3	2	2	2	2	0	0	1	2	2	1	4	0	1	1	1	2	0	2	1	1	3	0	0	4	3	4	4	2	3	2
P51401	P51401	16	1	1	60S ribosomal protein L9-B	RPL9B		1	16	1	1	7	6	6	5	8	8	7	7	11	7	5	5	3	8	7	6	6	7	9	3	8	5	6	9	3	5	9	7	6	1	2	0	0	0	0	0	0	0
P51402	P51402	7	2	2	60S ribosomal protein L37-B	RPL37B		1	7	2	2	3	5	3	5	4	5	4	6	3	4	3	6	4	3	1	4	5	3	6	3	3	2	4	5	3	2	4	3	5	5	3	1	2	1	2	2	2	2
P51862	P51862	13	13	13	RHO1 GDP-GTP exchange protein 2	ROM2		1	13	13	13	1	1	2	2	0	1	0	2	1	1	0	2	2	10	3	1	1	1	1	1	1	1	0	2	1	0	0	0	2	0	1	1	1	2	2	0	1	0
P51979	P51979	10	10	10	ATP-dependent DNA helicase MER3	HFM1		1	10	10	10	0	0	0	0	0	0	1	0	1	0	1	0	1	0	1	10	6	1	3	3	6	9	8	4	0	9	7	8	3	0	2	0	0	0	0	0	0	1
P52488	P52488	37	37	37	Ubiquitin-activating enzyme E1-like	UBA2		1	37	37	37	10	7	11	16	6	4	4	13	10	3	4	8	5	28	22	9	5	5	18	4	10	9	8	16	3	12	9	9	15	7	5	10	7	11	16	6	4	4
P52868	P52868	1	1	1	Pre-mRNA-splicing factor CWC23	CWC23		1	1	1	1	0	0	0	0	1	0	0	0	0	0	0	0	0	0	0	0	0	0	0	0	0	0	0	0	0	0	0	0	1	0	0	0	0	0	0	1	0	0
P52893	P52893	1	1	1	Probable alanine aminotransferase, mitochondrial	ALT1		1	1	1	1	0	0	1	0	0	0	0	0	0	0	0	0	0	0	0	0	0	0	0	0	0	0	0	0	0	0	0	0	0	0	0	0	0	1	0	0	0	0
P52910	P52910	13	13	13	Acetyl-coenzyme A synthetase 2	ACS2		1	13	13	13	10	9	10	7	4	6	8	6	4	4	4	4	6	1	3	3	4	3	3	2	4	4	2	4	2	3	3	2	4	0	1	10	9	10	7	4	6	8
P53044	P53044	3	3	3	Ubiquitin fusion degradation protein 1	UFD1		1	3	3	3	0	0	0	0	0	1	0	1	1	1	0	1	1	0	2	3	0	2	2	1	2	3	2	2	1	3	2	1	2	0	1	0	0	0	0	0	1	0
P53045	P53045	4	4	4	Methylsterol monooxygenase	ERG25		1	4	4	4	1	1	2	3	0	0	0	0	0	0	1	0	0	1	0	0	0	0	0	1	0	0	0	0	1	0	0	0	0	0	0	1	1	2	3	0	0	0
P53050	P53050	1	1	1	Protein MGA1	MGA1		1	1	1	1	0	0	0	1	0	0	0	1	0	0	0	0	1	0	0	0	0	0	1	0	0	0	0	0	0	0	0	0	0	0	0	0	0	0	1	0	0	0
P53061	P53061	4	4	4	Protein ZIP2	ZIP2		1	4	4	4	0	0	0	0	0	0	0	0	1	0	0	0	0	0	1	4	0	0	0	2	0	0	1	3	0	3	3	0	1	0	0	0	0	0	0	0	0	0
P53064	P53064	3	3	3	RNA polymerase-associated protein RTF1	RTF1		1	3	3	3	2	2	2	2	2	1	1	2	1	2	1	1	1	2	3	1	2	1	2	2	2	2	2	3	1	1	2	1	1	2	1	2	2	2	2	2	1	1
P53072	P53072	1	1	1	tRNA acetyltransferase TAN1	TAN1		1	1	1	1	1	0	0	1	1	0	1	1	1	0	0	1	0	1	1	1	1	0	1	1	0	0	1	1	0	1	1	1	1	0	0	1	0	0	1	1	0	1
P53075	P53075	1	1	1	Outer spore wall assembly protein SHE10	SHE10		1	1	1	1	0	0	0	0	0	0	0	0	0	0	0	0	0	1	0	0	0	0	0	0	0	0	0	0	0	0	0	0	0	0	0	0	0	0	0	0	0	0
P53081	P53081	2	2	2	NGG1-interacting factor 3	NIF3		1	2	2	2	0	0	0	0	1	1	1	0	1	1	1	0	0	1	0	1	1	0	0	0	1	1	1	0	1	0	1	1	0	0	1	0	0	0	0	1	1	1
P53090	P53090	1	1	1	Aromatic/aminoadipate aminotransferase 1	ARO8		1	1	1	1	0	0	0	0	0	0	0	0	1	0	1	0	0	1	0	0	0	1	0	0	0	0	0	0	1	0	0	0	1	0	0	0	0	0	0	0	0	0
P53096	P53096	1	1	1	Probable histone deacetylase HOS2	HOS2		1	1	1	1	1	1	1	0	0	1	1	0	1	1	1	0	0	0	0	0	0	1	0	0	1	0	0	0	0	0	1	1	0	0	0	1	1	1	0	0	1	1
P53100	P53100	1	1	1	Putative 2-hydroxyacid dehydrogenase YGL185C			1	1	1	1	0	0	0	0	0	0	0	0	0	0	0	0	0	0	0	0	0	0	0	0	0	0	0	1	0	0	0	0	0	0	0	0	0	0	0	0	0	0
P53102	P53102	3	3	3	Meiotic nuclear division protein 1	MND1		1	3	3	3	0	0	0	0	0	0	0	0	0	0	0	0	0	2	0	0	0	0	0	0	0	0	0	0	0	1	0	1	0	0	0	0	0	0	0	0	0	0
P53115	P53115	3	3	3	Putative DNA helicase INO80	INO80		1	3	3	3	0	0	0	0	0	0	0	0	0	0	0	0	1	2	2	0	0	0	1	1	0	0	0	0	0	0	1	0	0	0	0	0	0	0	0	0	0	0
P53133	P53133	1	1	1	Uncharacterized protein YGL117W	YGL117W		1	1	1	1	0	0	0	0	0	0	0	0	0	0	0	0	0	0	0	0	0	0	1	0	0	0	0	0	0	0	0	0	0	0	0	0	0	0	0	0	0	0
P53157	P53157	1	1	1	Mitochondrial pyruvate carrier 1	MPC1		1	1	1	1	0	0	0	0	0	0	0	0	0	0	0	0	0	0	0	0	0	0	0	0	0	0	0	0	1	0	0	0	0	0	0	0	0	0	0	0	0	0
P53172	P53172	2	2	2	Protein SDS23	SDS23		1	2	2	2	1	2	1	0	1	1	2	0	2	1	2	0	0	1	0	1	1	1	0	1	1	2	1	0	0	1	1	2	0	0	0	1	2	1	0	1	1	2
P53184	P53184	16	16	16	Nicotinamidase	PNC1		1	16	16	16	11	9	11	9	12	11	13	12	10	7	9	8	5	5	2	8	10	9	11	6	12	6	10	11	4	9	7	6	13	5	5	11	9	11	9	12	11	13
P53187	P53187	1	1	1	Homologous-pairing protein 2	HOP2		1	1	1	1	0	0	0	0	0	0	0	1	0	0	0	0	0	0	1	0	1	0	1	1	0	0	1	1	0	0	0	0	1	0	1	0	0	0	0	0	0	0
P53199	P53199	2	2	2	Sterol-4-alpha-carboxylate 3-dehydrogenase, decarboxylating	ERG26		1	2	2	2	0	0	0	0	0	0	1	0	0	0	0	0	0	1	0	0	0	1	0	0	0	0	0	0	0	0	1	0	0	0	0	0	0	0	0	0	0	1
P53201	P53201	2	2	2	SWR1-complex protein 4	SWC4		1	2	2	2	0	0	0	0	0	0	0	0	0	0	0	0	0	2	0	0	0	0	0	0	0	0	0	1	0	0	0	0	0	0	0	0	0	0	0	0	0	0
P53207	P53207	2	2	2	U1 small nuclear ribonucleoprotein component SNU71	SNU71		1	2	2	2	0	0	0	0	0	0	0	0	1	0	0	1	0	1	2	0	0	0	2	0	0	0	0	0	0	0	0	1	2	0	0	0	0	0	0	0	0	0
P53219	P53219	1	1	1	Abhydrolase domain-containing protein IMO32	IMO32		1	1	1	1	0	0	0	0	0	0	1	0	0	0	0	0	0	0	0	0	0	0	0	0	0	0	0	0	0	0	0	0	0	0	0	0	0	0	0	0	0	1
P53221;P05743	P53221;P05743	11;9	11;9	11;9	60S ribosomal protein L26-B;60S ribosomal protein L26-A	RPL26B;RPL26A	;	2	11	11	11	4	1	1	2	4	1	1	7	3	1	1	2	0	3	9	1	1	2	8	1	1	1	3	5	1	1	2	2	3	1	1	4	1	1	2	4	1	1
P53227	P53227	1	1	1	Uncharacterized protein YGR042W	YGR042W		1	1	1	1	1	0	1	1	0	0	0	0	0	0	0	0	0	1	1	0	0	0	0	0	0	0	0	0	0	0	0	0	0	1	0	1	0	1	1	0	0	0
P53228	P53228	1	1	1	Transaldolase NQM1	NQM1		1	1	1	1	0	0	0	0	1	1	0	0	1	0	0	0	0	1	0	1	0	0	1	0	0	0	0	0	0	1	1	0	0	0	0	0	0	0	0	1	1	0
P53236	P53236	2	2	2	Chromatin structure-remodeling complex subunit RSC1	RSC1		1	2	2	2	0	1	1	1	0	0	0	2	1	0	0	1	1	1	2	1	2	0	2	0	0	1	0	1	0	1	0	0	1	0	0	0	1	1	1	0	0	0
P53252	P53252	4	4	4	Sphingolipid long chain base-responsive protein PIL1	PIL1		1	4	4	4	2	1	1	1	1	0	0	0	2	0	0	0	1	3	2	2	0	0	2	2	2	0	1	0	0	1	2	0	0	0	0	2	1	1	1	1	0	0
P53261	P53261	2	2	2	Pescadillo homolog	NOP7		1	2	2	2	2	2	1	1	0	1	0	0	0	0	0	0	0	1	0	0	0	0	1	0	0	0	0	0	0	0	0	0	0	0	0	2	2	1	1	0	1	0
P53264	P53264	4	4	4	Cardiolipin-specific deacylase 1, mitochondrial	CLD1		1	4	4	4	0	0	0	0	1	1	2	0	1	1	0	0	1	3	0	1	1	1	2	1	1	1	1	1	0	1	1	1	2	0	2	0	0	0	0	1	1	2
P53274	P53274	5	5	5	Uncharacterized protein YGR126W			1	5	5	5	0	0	0	2	0	0	0	2	0	0	1	2	3	0	1	0	0	0	1	0	0	0	0	2	1	0	0	0	1	0	0	0	0	0	2	0	0	0
P53276	P53276	2	2	2	U3 small nucleolar RNA-associated protein 8	UTP8		1	2	2	2	1	1	1	0	0	1	0	0	0	0	0	1	1	0	0	0	0	0	0	0	0	0	1	1	0	0	0	1	1	0	0	1	1	1	0	0	1	0
P53297	P53297	26	26	26	PAB1-binding protein 1	PBP1		1	26	26	26	16	19	21	23	13	12	18	18	12	13	16	13	7	12	15	9	14	15	15	5	8	13	10	13	7	8	7	12	11	3	6	16	19	21	23	13	12	18
P53303	P53303	1	1	1	Zinc finger protein ZPR1	ZPR1		1	1	1	1	1	1	1	1	0	0	0	1	0	0	0	1	0	0	1	1	0	0	1	0	1	1	1	1	0	1	1	0	1	0	0	1	1	1	1	0	0	0
P53311	P53311	1	1	1	Mitochondrial pyruvate carrier 3	MPC3		1	1	1	1	0	0	0	0	0	0	0	0	0	0	0	0	0	1	0	0	0	0	0	0	0	0	0	0	0	0	0	0	0	0	0	0	0	0	0	0	0	0
P53312	P53312	2	2	2	Succinyl-CoA ligase [ADP-forming] subunit beta, mitochondrial	LSC2		1	2	2	2	0	0	0	1	0	0	2	1	0	2	2	0	0	1	0	0	0	1	0	0	1	1	0	1	1	0	0	2	0	0	1	0	0	0	1	0	0	2
P53316	P53316	2	2	2	Uncharacterized RNA-binding protein YGR250C	YGR250C		1	2	2	2	0	0	0	0	0	0	1	0	0	1	0	0	0	0	0	0	0	0	0	0	2	1	0	0	0	0	1	1	0	0	0	0	0	0	0	0	0	1
P53320	P53320	2	2	2	Mitochondrial carrier protein MTM1	MTM1		1	2	2	2	0	0	0	0	1	1	0	1	1	1	1	1	0	0	0	1	0	0	1	0	1	1	0	0	0	1	0	0	0	0	0	0	0	0	0	1	1	0
P53326	P53326	21	21	21	Uncharacterized protein YGR266W	YGR266W		1	21	21	21	14	14	18	15	9	12	10	11	9	8	7	11	5	7	0	10	9	6	13	6	7	9	8	14	4	9	12	7	15	4	6	14	14	18	15	9	12	10
P53330	P53330	1	1	1	Regulator of Ty1 transposition protein 102	RTT102		1	1	1	1	0	0	0	0	1	0	0	0	0	0	0	0	1	0	1	0	0	1	1	0	0	0	0	0	0	0	0	0	0	0	0	0	0	0	0	1	0	0
P53332	P53332	7	7	7	Phosphopantetheine adenylyltransferase	CAB4		1	7	7	7	3	2	5	2	3	3	4	2	4	3	3	1	3	0	1	4	2	1	1	3	4	1	2	2	1	4	2	1	3	1	3	3	2	5	2	3	3	4
P53397	P53397	1	1	1	N-glycosylase/DNA lyase;8-oxoguanine DNA glycosylase;DNA-(apurinic or apyrimidinic site) lyase	OGG1		1	1	1	1	0	0	0	0	0	1	0	0	0	1	0	0	0	1	0	0	0	0	1	0	0	0	1	0	0	1	0	0	0	0	0	0	0	0	0	0	1	0
P53551	P53551	18	18	18	Histone H1	HHO1		1	18	18	18	2	3	3	3	4	4	3	4	6	4	3	4	6	7	9	7	6	4	11	5	6	5	7	9	2	7	8	5	6	0	3	2	3	3	3	4	4	3
P53598	P53598	2	2	2	Succinyl-CoA ligase [ADP-forming] subunit alpha, mitochondrial	LSC1		1	2	2	2	0	0	0	0	0	0	0	0	0	0	1	0	0	2	0	0	0	0	0	0	0	0	0	0	0	0	0	0	0	0	0	0	0	0	0	0	0	0
P53615	P53615	6	6	6	Carbonic anhydrase	NCE103		1	6	6	6	0	0	0	0	3	4	5	3	1	4	3	0	2	1	2	1	0	1	1	1	0	0	0	1	0	0	0	0	1	0	0	0	0	0	0	3	4	5
P53622	P53622	21	21	21	Coatomer subunit alpha	COP1		1	21	21	21	8	8	10	14	7	4	6	7	8	6	5	6	7	9	2	5	5	2	4	5	8	6	4	12	4	4	7	4	10	0	5	8	8	10	14	7	4	6
P53628	P53628	3	3	3	Transcription regulatory protein SNF12	SNF12		1	3	3	3	0	0	0	1	0	0	0	1	1	0	0	0	1	3	1	1	1	0	1	0	1	0	0	0	0	0	0	0	1	0	0	0	0	0	1	0	0	0
P53685	P53685	2	2	2	NAD-dependent protein deacetylase HST1	HST1		1	2	2	2	2	2	2	1	1	2	0	0	1	0	0	0	0	1	1	0	0	0	1	0	0	0	0	0	0	0	0	0	0	0	0	2	2	2	1	1	2	0
P53691	P53691	2	1	1	Peptidyl-prolyl cis-trans isomerase CPR6	CPR6		1	2	1	1	1	0	1	1	2	2	1	2	2	2	2	0	0	0	1	2	2	2	1	1	2	2	2	2	1	2	2	2	0	0	1	0	0	0	0	1	1	1
P53720	P53720	3	3	3	tRNA-dihydrouridine(20) synthase [NAD(P)+]	SMM1		1	3	3	3	0	0	0	0	0	1	0	1	1	0	0	0	1	2	0	0	0	0	1	0	1	0	0	1	0	0	0	0	1	0	0	0	0	0	0	0	1	0
P53731	P53731	5	5	5	Actin-related protein 2/3 complex subunit 2	ARC35		1	5	5	5	2	3	2	5	3	4	4	5	2	4	3	4	2	1	1	3	4	2	4	2	3	2	4	4	1	2	3	2	5	0	0	2	3	2	5	3	4	4
P53739;P25341	P53739	8;1	8;1	8;1	Flippase kinase 1	FPK1		2	8	8	8	4	3	6	5	2	2	0	2	1	0	0	0	0	0	0	1	2	0	1	0	0	0	2	0	0	1	0	0	3	0	0	4	3	6	5	2	2	0
P53830	P53830	1	1	1	Cold sensitive U2 snRNA suppressor 2	CUS2		1	1	1	1	0	0	0	0	0	0	0	1	0	0	0	0	0	0	1	0	0	0	1	0	0	0	0	1	0	0	0	0	0	0	0	0	0	0	0	0	0	0
P53849	P53849	4	4	4	Zinc finger protein GIS2	GIS2		1	4	4	4	3	3	3	3	3	2	2	4	3	1	1	3	1	1	2	3	2	3	4	1	3	2	3	4	0	2	2	3	3	1	1	3	3	3	3	3	2	2
P53852	P53852	1	1	1	Cysteine--tRNA ligase			1	1	1	1	0	0	0	1	0	0	0	0	0	0	0	0	0	0	0	0	0	0	0	0	0	0	0	0	0	0	0	0	1	0	0	0	0	0	1	0	0	0
P53853	P53853	2	2	2	Vacuolar protein sorting-associated protein 75	VPS75		1	2	2	2	0	0	0	0	0	0	0	0	0	0	0	0	0	1	1	0	0	0	1	0	0	0	0	0	0	0	0	0	0	0	0	0	0	0	0	0	0	0
P53860	P53860	3	3	3	Phosphatidylinositol transfer protein PDR16	PDR16		1	3	3	3	0	0	0	0	1	1	1	0	1	0	1	0	0	1	1	0	0	0	0	0	0	1	0	1	0	2	1	0	0	0	0	0	0	0	0	1	1	1
P53885	P53885	4	4	4	Signal transduction protein MDG1	MDG1		1	4	4	4	2	1	2	3	2	1	2	3	2	2	2	2	1	2	2	2	2	2	3	1	2	1	2	3	1	3	2	2	3	1	1	2	1	2	3	2	1	2
P53889	P53889	2	2	2	Uncharacterized mitochondrial hydrolase FMP41	FMP41		1	2	2	2	0	0	0	0	1	2	2	0	1	2	2	1	1	1	0	2	2	1	0	1	2	1	1	0	1	0	1	0	0	0	1	0	0	0	0	1	2	2
P53911	P53911	5	5	5	Chromatin modification-related protein EAF7	EAF7		1	5	5	5	3	2	3	2	2	3	1	2	3	2	3	1	1	4	2	2	2	4	3	2	3	2	3	2	1	2	3	3	2	0	3	3	2	3	2	2	3	1
P53912	P53912	2	2	2	Uncharacterized protein YNL134C			1	2	2	2	0	0	0	0	0	0	1	0	0	0	0	0	0	1	0	0	0	1	0	0	0	0	1	0	0	0	0	0	0	0	0	0	0	0	0	0	0	1
P53921	P53921	1	1	1	Putative mitochondrial ribosomal protein YNL122C			1	1	1	1	1	1	1	0	1	1	1	1	1	1	1	0	0	0	0	0	0	1	1	0	1	0	0	0	0	0	1	1	1	1	0	1	1	1	0	1	1	1
P53924	P53924	2	2	2	E3 ubiquitin-protein ligase DMA2	DMA2		1	2	2	2	1	1	1	1	1	1	1	1	1	1	1	1	1	0	0	1	1	1	1	1	1	1	1	1	1	1	1	1	1	2	1	1	1	1	1	1	1	1
P53925	P53925	3	3	3	Uncharacterized vacuolar membrane protein YNL115C			1	3	3	3	0	0	0	0	0	0	1	0	0	0	0	0	0	1	0	1	0	1	1	0	1	1	0	0	0	1	0	2	0	0	0	0	0	0	0	0	0	1
P53930	P53930	2	2	2	Protein AF-9 homolog	YAF9		1	2	2	2	1	1	1	1	1	1	1	1	1	1	1	1	1	0	1	1	1	1	1	0	1	1	1	1	0	1	0	1	0	0	0	1	1	1	1	1	1	1
P53935	P53935	4	4	4	Stress response protein NST1	NST1		1	4	4	4	1	1	0	2	1	2	2	2	1	2	1	1	1	3	3	2	2	1	1	1	2	1	2	3	1	1	2	2	3	0	2	1	1	0	2	1	2	2
P53941	P53941	2	2	2	U3 small nucleolar ribonucleoprotein protein IMP4	IMP4		1	2	2	2	0	0	0	1	0	0	0	0	0	0	0	0	0	0	0	0	0	0	0	0	0	0	0	0	0	0	0	0	1	0	0	0	0	0	1	0	0	0
P53946	P53946	3	3	3	Actin-related protein 5	ARP5		1	3	3	3	0	0	0	0	0	0	1	1	1	1	0	0	1	2	1	0	0	1	1	0	1	1	1	1	1	0	1	0	1	0	1	0	0	0	0	0	0	1
P53950	P53950	2	2	2	Vacuolar segregation protein 7	VAC7		1	2	2	2	0	1	0	0	0	1	0	0	0	0	0	0	0	0	0	0	0	0	0	0	0	0	0	0	0	1	1	1	0	0	0	0	1	0	0	0	1	0
P53958	P53958	2	2	2	Protein BOP3	BOP3		1	2	2	2	0	1	1	2	0	0	0	0	1	0	0	0	0	0	0	0	0	0	0	0	0	0	0	0	0	0	0	0	0	0	0	0	1	1	2	0	0	0
P53962	P53962	2	2	2	Uncharacterized WD repeat-containing protein YNL035C			1	2	2	2	0	0	1	0	0	0	1	1	0	0	0	0	0	0	0	1	1	0	1	0	0	0	1	1	0	0	1	0	1	0	0	0	0	1	0	0	0	1
P53968	P53968	8	8	8	Transcriptional regulator CRZ1	CRZ1		1	8	8	8	5	4	6	5	6	4	3	4	6	3	3	5	1	3	6	6	5	3	5	2	4	6	4	4	1	6	5	4	5	1	2	5	4	6	5	6	4	3
P53969	P53969	4	4	4	Sorting assembly machinery 50 kDa subunit	SAM50		1	4	4	4	1	0	0	2	0	0	0	2	0	0	0	0	2	1	0	0	0	0	2	0	0	0	0	3	1	0	0	0	3	0	0	1	0	0	2	0	0	0
P53973	P53973	1	1	1	Histone deacetylase HDA1	HDA1		1	1	1	1	1	1	1	1	1	1	1	1	1	1	1	1	1	1	1	1	1	1	1	1	1	1	1	1	1	1	1	1	1	1	1	1	1	1	1	1	1	1
P54000	P54000	2	2	2	RNA polymerase II transcriptional coactivator SUB1	SUB1		1	2	2	2	1	1	1	1	1	1	1	1	1	1	1	1	1	1	2	1	1	1	1	1	1	1	1	1	0	1	1	1	1	1	0	1	1	1	1	1	1	1
P54115	P54115	4	4	4	Magnesium-activated aldehyde dehydrogenase, cytosolic	ALD6		1	4	4	4	1	0	2	1	0	0	0	0	0	0	0	0	0	2	1	0	0	0	2	0	0	0	0	0	0	0	0	0	0	0	0	1	0	2	1	0	0	0
P54783	P54783	1	1	1	D-arabinono-1,4-lactone oxidase	ALO1		1	1	1	1	0	0	0	1	1	1	1	1	1	1	1	0	0	0	0	1	1	0	1	0	1	1	1	1	0	1	1	0	1	0	0	0	0	0	1	1	1	1
P54784	P54784	18	18	18	Origin recognition complex subunit 1	ORC1		1	18	18	18	0	1	2	1	5	6	3	3	6	4	2	3	5	4	8	12	6	1	2	2	3	5	9	4	1	13	11	11	4	1	2	0	1	2	1	5	6	3
P54785	P54785	7	7	7	Transcriptional activator/repressor MOT3	MOT3		1	7	7	7	5	5	5	5	5	5	5	5	5	5	5	4	4	4	5	4	5	5	5	3	5	5	4	4	3	4	5	5	5	2	3	5	5	5	5	5	5	5
P54790	P54790	1	1	1	Origin recognition complex subunit 3	ORC3		1	1	1	1	1	0	0	0	0	0	0	0	0	0	0	0	0	1	0	0	0	0	0	0	0	0	0	0	0	0	0	0	0	0	0	1	0	0	0	0	0	0
P54791	P54791	3	3	3	Origin recognition complex subunit 4	ORC4		1	3	3	3	1	1	1	1	1	1	1	2	1	1	1	0	0	1	2	1	1	1	1	0	0	1	0	0	0	1	0	1	0	0	0	1	1	1	1	1	1	1
P54838	P54838	1	1	1	Dihydroxyacetone kinase 1	DAK1		1	1	1	1	0	0	0	0	0	0	0	0	0	0	0	0	0	0	0	0	0	1	0	0	0	0	0	0	0	0	0	1	0	0	0	0	0	0	0	0	0	0
P54839	P54839	10	10	10	Hydroxymethylglutaryl-CoA synthase	ERG13		1	10	10	10	1	0	1	2	1	1	3	2	0	0	1	0	2	4	3	0	2	1	5	0	0	1	0	3	1	0	1	2	3	0	3	1	0	1	2	1	1	3
P54858	P54858	1	1	1	Protein DOS2	DOS2		1	1	1	1	0	0	0	0	0	0	0	0	0	0	0	0	0	1	0	0	0	0	0	0	0	0	0	0	0	0	0	0	0	0	0	0	0	0	0	0	0	0
P60010	P60010	14	14	14	Actin	ACT1		1	14	14	14	1	0	2	2	2	5	6	3	2	4	2	1	1	7	4	3	2	2	5	2	4	4	2	3	2	2	3	2	2	0	2	1	0	2	2	2	5	6
P61830	P61830	11	11	11	Histone H3	HHT1		1	11	11	11	8	8	9	6	8	7	8	8	8	9	9	7	3	0	5	8	9	7	9	6	8	8	9	8	5	9	8	9	7	3	6	8	8	9	6	8	7	8
P69771	P69771	1	1	1	Vacuolar protein-sorting-associated protein 46	DID2		1	1	1	1	1	1	1	1	1	1	1	1	1	0	0	1	1	1	1	1	1	0	1	1	1	1	1	1	1	1	1	1	1	0	1	1	1	1	1	1	1	1
P69850	P69850	1	1	1	DASH complex subunit DAD3	DAD3		1	1	1	1	0	0	0	0	0	0	0	0	0	1	0	0	0	0	0	0	0	0	0	0	0	0	0	0	0	0	0	0	0	0	0	0	0	0	0	0	0	0
P80210	P80210	2	2	2	Adenylosuccinate synthetase	ADE12		1	2	2	2	0	0	0	0	0	0	0	1	0	0	0	0	0	2	0	0	0	0	1	0	0	0	0	0	0	0	0	0	0	0	0	0	0	0	0	0	0	0
P80235	P80235	6	6	6	Putative mitochondrial carnitine O-acetyltransferase	YAT1		1	6	6	6	3	1	4	3	4	5	5	4	1	4	3	1	1	0	0	4	3	1	3	2	2	3	1	5	0	2	2	3	2	0	3	3	1	4	3	4	5	5
P81451	P81451	2	2	2	ATP synthase subunit K, mitochondrial	ATP19		1	2	2	2	0	0	0	1	0	0	0	1	0	0	0	0	0	0	1	1	0	0	1	0	0	1	1	0	1	1	0	0	0	0	0	0	0	0	1	0	0	0
P87262	P87262	6	2	2	60S ribosomal protein L34-A	RPL34A		1	6	2	2	2	2	2	2	2	2	4	2	3	3	4	2	3	2	4	2	3	4	2	1	4	2	2	1	5	2	4	2	3	1	1	1	1	1	1	1	1	1
P89102	P89102	1	1	1	Exocyst complex component SEC5	SEC5		1	1	1	1	1	1	0	1	1	1	1	1	1	1	1	1	1	0	0	1	1	1	1	1	1	1	1	1	1	1	1	1	1	1	1	1	1	0	1	1	1	1
P89105	P89105	3	3	3	RNA polymerase-associated protein CTR9	CTR9		1	3	3	3	1	1	0	1	1	1	0	0	0	0	0	0	1	0	1	1	0	0	0	0	0	0	0	1	0	0	0	0	1	0	0	1	1	0	1	1	1	0
Q00055	Q00055	8	7	7	Glycerol-3-phosphate dehydrogenase [NAD(+)] 1	GPD1		1	8	7	7	2	2	2	2	6	5	6	4	6	5	3	2	4	3	2	5	6	5	5	2	6	5	5	4	2	5	6	6	5	3	4	1	1	1	1	5	4	5
Q00402	Q00402	10	10	10	Nuclear migration protein NUM1	NUM1		1	10	10	10	5	5	5	3	5	6	6	3	7	6	7	3	1	3	4	7	6	6	4	3	7	5	7	4	2	7	7	4	5	1	2	5	5	5	3	5	6	6
Q00684	Q00684	2	2	2	Tyrosine-protein phosphatase CDC14	CDC14		1	2	2	2	1	0	0	0	0	0	0	0	0	0	0	0	0	1	1	0	0	0	0	0	0	0	0	0	0	0	0	0	0	0	0	1	0	0	0	0	0	0
Q00711;P47052	Q00711	39;6	39;6	39;6	Succinate dehydrogenase [ubiquinone] flavoprotein subunit, mitochondrial	SDH1		2	39	39	39	25	17	29	23	23	25	30	27	20	20	15	18	13	9	6	19	17	13	28	9	17	14	17	22	3	18	15	11	26	6	6	25	17	29	23	23	25	30
Q00764	Q00764	10	10	10	Alpha,alpha-trehalose-phosphate synthase [UDP-forming] 56 kDa subunit	TPS1		1	10	10	10	4	3	4	3	4	4	6	4	5	6	3	3	2	3	1	4	3	2	5	2	3	4	4	4	2	4	4	2	4	2	2	4	3	4	3	4	4	6
Q01080	Q01080	6	6	6	DNA-directed RNA polymerase I subunit RPA49	RPA49		1	6	6	6	0	1	2	1	0	1	0	0	1	0	0	0	0	4	2	0	1	0	1	0	0	1	0	1	0	0	0	0	0	1	0	0	1	2	1	0	1	0
Q01448;P03876	Q01448	23;1	23;1	23;1	Histone promoter control protein 2	HPC2		2	23	23	23	7	4	6	2	9	6	6	5	5	4	5	2	5	13	12	6	4	3	6	4	5	5	4	2	2	6	5	7	3	1	2	7	4	6	2	9	6	6
Q01477	Q01477	11	11	11	Ubiquitin carboxyl-terminal hydrolase 3	UBP3		1	11	11	11	3	5	5	7	4	3	3	6	3	4	3	4	5	6	5	4	5	3	4	3	3	4	3	6	4	3	5	5	4	1	3	3	5	5	7	4	3	3
Q01519	Q01519	3	3	3	Cytochrome c oxidase subunit 6B	COX12		1	3	3	3	1	1	0	0	1	1	1	1	2	1	1	0	0	0	1	0	1	1	1	0	1	1	1	0	1	1	1	1	0	0	0	1	1	0	0	1	1	1
Q01560	Q01560	17	17	17	Nucleolar protein 3	NPL3		1	17	17	17	10	11	9	7	12	7	11	4	11	9	9	4	3	0	2	10	11	7	8	2	13	12	8	11	2	11	11	9	10	3	2	10	11	9	7	12	7	11
Q01574	Q01574	25	25	25	Acetyl-coenzyme A synthetase 1	ACS1		1	25	25	25	1	3	7	4	9	8	12	9	9	10	10	6	8	16	10	9	9	8	12	8	10	9	13	11	5	12	14	8	9	5	10	1	3	7	4	9	8	12
Q01722	Q01722	4	4	4	Glycolytic genes transcriptional activator GCR2	GCR2		1	4	4	4	2	3	4	2	2	1	0	1	0	0	1	0	0	0	2	0	0	0	0	0	0	0	0	0	0	1	1	0	0	0	0	2	3	4	2	2	1	0
Q01855	Q01855	4	4	4	40S ribosomal protein S15	RPS15		1	4	4	4	1	2	1	1	1	2	2	2	3	2	2	2	1	2	1	3	2	1	2	0	2	2	2	1	1	1	2	2	1	1	1	1	2	1	1	1	2	2
Q02100	Q02100	5	5	5	CRE-binding bZIP protein SKO1	SKO1		1	5	5	5	4	2	1	1	3	2	1	2	4	2	2	2	2	2	3	3	2	4	3	1	4	3	1	2	1	3	1	4	1	0	0	4	2	1	1	3	2	1
Q02206	Q02206	2	2	2	Chromatin structure-remodeling complex subunit RSC4	RSC4		1	2	2	2	0	0	1	0	0	0	0	0	1	0	1	0	0	0	0	2	0	1	0	0	0	0	1	0	0	0	0	0	0	0	0	0	0	1	0	0	0	0
Q02207	Q02207	2	2	2	Peroxisomal hydratase-dehydrogenase-epimerase;2-enoyl-CoA hydratase;(3R)-3-hydroxyacyl-CoA dehydrogenase	FOX2		1	2	2	2	0	0	0	0	0	0	0	0	0	0	0	0	0	1	0	0	0	0	0	0	0	0	0	0	0	0	0	1	0	0	1	0	0	0	0	0	0	0
Q02208	Q02208	20	20	20	Topoisomerase 1-associated factor 2	TOF2		1	20	20	20	5	7	10	8	7	6	5	5	6	8	7	6	12	11	13	8	7	5	4	6	6	9	4	3	3	8	5	8	3	0	1	5	7	10	8	7	6	5
Q02209	Q02209	2	2	2	Uncharacterized protein YKR011C			1	2	2	2	1	1	2	0	2	1	1	0	1	1	1	0	1	1	2	2	2	0	2	1	0	0	0	1	0	2	1	1	1	0	1	1	1	2	0	2	1	1
Q02326	Q02326	4	4	3	60S ribosomal protein L6-A	RPL6A		1	4	4	3	1	0	1	1	0	1	1	0	1	1	0	1	1	1	3	2	1	1	2	1	1	1	1	1	3	2	1	1	0	0	1	1	0	1	1	0	1	1
Q02457	Q02457	5	5	5	Protein TBF1	TBF1		1	5	5	5	0	0	0	0	0	0	0	0	0	0	0	0	1	5	1	0	0	0	0	1	0	0	0	0	0	0	0	0	0	0	0	0	0	0	0	0	0	0
Q02486	Q02486	7	7	7	ARS-binding factor 2, mitochondrial	ABF2		1	7	7	7	4	2	3	3	1	3	5	3	6	3	2	4	2	0	2	2	3	3	2	4	3	1	3	4	4	3	5	3	5	1	1	4	2	3	3	1	3	5
Q02642	Q02642	7	7	7	Nascent polypeptide-associated complex subunit beta-1	EGD1		1	7	7	7	5	3	5	5	5	5	4	5	5	5	5	5	2	2	4	5	4	3	6	4	5	4	6	5	4	5	5	3	6	0	3	5	3	5	5	5	5	4
Q02647	Q02647	1	1	1	Dynein light chain 1, cytoplasmic	DYN2		1	1	1	1	1	0	1	0	0	1	0	1	1	0	1	1	0	0	0	1	0	0	0	0	0	0	0	0	0	0	1	0	0	0	0	1	0	1	0	0	1	0
Q02724	Q02724	42	42	42	Ubiquitin-like-specific protease 1	ULP1		1	42	42	42	18	22	31	24	16	19	11	22	18	17	13	24	22	13	22	23	23	11	33	11	14	19	22	31	8	18	23	18	25	11	15	18	22	31	24	16	19	11
Q02753	Q02753	19	19	2	60S ribosomal protein L21-A	RPL21A		1	19	19	2	9	7	8	9	11	10	12	11	10	9	10	8	7	14	11	12	8	12	8	9	11	9	9	9	9	8	10	7	7	1	8	9	7	8	9	11	10	12
Q02775	Q02775	1	1	1	Pre-mRNA-splicing factor SLU7	SLU7		1	1	1	1	0	0	0	0	0	0	0	0	1	0	0	0	0	1	1	0	0	0	1	0	0	0	0	0	0	0	0	0	1	0	0	0	0	0	0	0	0	0
Q02793	Q02793	3	3	3	Antiviral protein SKI8	SKI8		1	3	3	3	0	0	0	0	0	0	0	1	0	0	0	1	0	0	0	0	0	0	1	0	0	0	0	1	0	0	0	0	3	1	0	0	0	0	0	0	0	0
Q02821	Q02821	1	1	1	Importin subunit alpha	SRP1		1	1	1	1	1	1	1	0	0	0	0	1	0	0	0	0	1	0	0	1	0	0	0	1	0	1	0	0	0	0	0	0	1	0	0	1	1	1	0	0	0	0
Q02883	Q02883	2	2	2	N-acyl-phosphatidylethanolamine-hydrolyzing phospholipase D, mitochondrial	FMP30		1	2	2	2	0	0	1	2	0	0	0	1	0	0	0	2	1	0	0	0	0	0	1	1	0	1	0	1	0	0	0	0	1	0	0	0	0	1	2	0	0	0
Q02884	Q02884	1	1	1	Elongator complex protein 4	ELP4		1	1	1	1	1	1	1	1	1	1	1	1	1	1	1	1	1	0	0	1	1	1	1	1	1	1	1	1	0	1	1	1	1	0	1	1	1	1	1	1	1	1
Q02933	Q02933	1	1	1	Ribonuclease T2-like	RNY1		1	1	1	1	0	0	0	0	1	0	1	0	1	0	0	0	0	1	0	1	1	0	0	1	1	1	0	0	1	0	1	1	0	0	1	0	0	0	0	1	0	1
Q02950	Q02950	1	1	1	37S ribosomal protein MRP51, mitochondrial	MRP51		1	1	1	1	0	0	0	0	0	0	0	0	0	0	0	0	0	1	0	0	0	0	0	0	0	0	0	0	0	0	0	0	0	0	0	0	0	0	0	0	0	0
Q02959	Q02959	7	7	7	Histone deacetylase HOS3	HOS3		1	7	7	7	3	5	4	4	2	2	1	3	3	1	1	1	2	2	0	1	2	1	3	1	1	1	2	4	1	2	2	1	2	0	1	3	5	4	4	2	2	1
Q02961	Q02961	1	1	1	Putative 2-hydroxyacid dehydrogenase YPL113C	YPL113C		1	1	1	1	0	0	0	0	0	0	0	0	0	0	0	0	0	1	0	0	0	0	0	0	0	0	0	0	0	0	0	0	0	0	0	0	0	0	0	0	0	0
Q02979	Q02979	5	5	5	Glycerophosphodiester phosphodiesterase GDE1	GDE1		1	5	5	5	3	4	3	2	3	4	2	1	3	2	0	0	1	0	0	3	3	1	0	1	3	3	3	2	1	3	2	2	3	0	2	3	4	3	2	3	4	2
Q03012	Q03012	8	8	8	COMPASS component SPP1	SPP1		1	8	8	8	0	1	0	1	2	2	2	3	4	5	4	5	6	5	3	4	2	2	5	2	2	3	3	3	1	3	3	2	2	1	0	0	1	0	1	2	2	2
Q03028	Q03028	2	2	2	Mitochondrial 2-oxodicarboxylate carrier 1	ODC1		1	2	2	2	0	0	0	0	0	0	0	0	0	0	0	0	0	2	0	0	0	0	0	0	0	0	0	0	0	0	0	0	0	0	0	0	0	0	0	0	0	0
Q03048	Q03048	5	5	5	Cofilin	COF1		1	5	5	5	0	0	0	0	0	0	1	0	2	2	2	0	0	5	0	0	1	1	0	1	1	2	0	0	2	0	1	2	0	0	1	0	0	0	0	0	0	1
Q03175	Q03175	1	1	1	Dehydrodolichyl diphosphate syntase complex subunit SRT1	SRT1		1	1	1	1	0	0	0	0	0	0	0	0	0	0	0	0	0	0	0	0	0	0	0	0	0	0	0	1	0	0	0	0	0	0	0	0	0	0	0	0	0	0
Q03177	Q03177	4	4	4	WD repeat-containing protein YMR102C			1	4	4	4	1	3	2	3	1	0	2	2	1	1	1	2	2	3	0	1	1	0	2	1	3	1	1	3	1	1	1	1	2	0	1	1	3	2	3	1	0	2
Q03201	Q03201	1	1	1	37S ribosomal protein S10, mitochondrial	RSM10		1	1	1	1	0	0	0	0	1	0	1	0	1	1	1	0	0	0	0	0	0	1	0	0	1	0	0	0	0	1	0	0	0	0	0	0	0	0	0	1	0	1
Q03262	Q03262	6	6	6	Phosphoribomutase	PRM15		1	6	6	6	5	4	4	5	2	3	2	2	3	3	1	2	2	0	1	3	2	1	3	1	2	3	2	5	1	2	3	1	4	1	2	5	4	4	5	2	3	2
Q03280	Q03280	2	2	2	E3 ubiquitin-protein ligase TOM1	TOM1		1	2	2	2	0	0	0	1	0	0	0	1	0	0	0	1	0	1	0	0	0	0	1	0	0	0	1	2	0	0	1	0	2	0	0	0	0	0	1	0	0	0
Q03323	Q03323	3	3	3	COMPASS component SDC1	SDC1		1	3	3	3	2	2	2	2	2	2	2	2	2	2	2	2	1	1	2	2	2	2	3	2	2	3	2	2	1	3	2	2	2	0	1	2	2	2	2	2	2	2
Q03330	Q03330	5	5	5	Histone acetyltransferase GCN5	GCN5		1	5	5	5	5	4	5	4	4	4	3	4	4	4	3	3	3	3	3	3	3	3	3	1	2	3	3	3	2	3	3	1	4	0	1	5	4	5	4	4	4	3
Q03361	Q03361	11	11	11	Uncharacterized protein JIP4	JIP4		1	11	11	11	3	1	3	4	4	2	3	2	3	2	4	3	4	7	3	1	2	2	4	2	3	2	2	3	3	2	3	1	2	1	2	3	1	3	4	4	2	3
Q03373	Q03373	1	1	1	Down-regulator of invasive growth 2	DIG2		1	1	1	1	0	0	0	1	0	0	0	1	0	0	0	1	0	1	1	0	0	0	1	0	0	0	0	0	0	0	0	0	0	0	0	0	0	0	1	0	0	0
Q03388	Q03388	6	6	6	Vacuolar protein sorting-associated protein 72	VPS72		1	6	6	6	4	6	5	3	4	3	4	3	5	5	4	2	2	2	4	4	5	4	3	1	4	4	4	1	0	5	4	4	3	0	2	4	6	5	3	4	3	4
Q03390	Q03390	1	1	1	Vacuolar protein-sorting-associated protein 60	VPS60		1	1	1	1	0	0	0	1	0	0	0	1	0	0	0	0	0	0	1	0	0	0	0	0	0	0	0	0	0	0	0	0	0	0	0	0	0	0	1	0	0	0
Q03435	Q03435	9	9	9	Non-histone protein 10	NHP10		1	9	9	9	5	5	6	5	6	6	6	4	6	6	6	3	5	5	7	5	5	5	6	5	6	6	6	3	4	6	5	6	4	1	5	5	5	6	5	6	6	6
Q03532	Q03532	2	2	2	ATP-dependent RNA helicase HAS1	HAS1		1	2	2	2	0	0	0	0	0	0	0	0	0	0	0	1	0	1	0	0	0	0	0	0	0	0	0	0	0	0	0	0	0	0	0	0	0	0	0	0	0	0
Q03630	Q03630	1	1	1	Trafficking protein particle complex subunit BET5	BET5		1	1	1	1	0	0	0	0	0	0	0	0	1	1	0	0	1	0	0	1	0	0	0	1	0	1	0	0	0	1	1	1	0	0	1	0	0	0	0	0	0	0
Q03653	Q03653	4	4	4	Protein EFR3	EFR3		1	4	4	4	0	0	0	1	0	0	0	0	0	0	0	1	0	2	0	1	0	0	1	0	0	0	0	1	0	0	1	0	0	0	0	0	0	0	1	0	0	0
Q03661	Q03661	11	11	11	Silent chromatin protein ESC1	ESC1		1	11	11	11	3	2	4	1	5	3	4	5	7	4	4	4	5	3	7	8	8	4	7	3	7	8	6	8	2	8	8	8	8	1	3	3	2	4	1	5	3	4
Q03690	Q03690	4	4	4	Clustered mitochondria protein 1	CLU1		1	4	4	4	1	1	1	2	0	2	1	1	2	2	2	2	1	2	1	2	3	1	1	2	2	2	2	2	2	2	2	2	2	0	2	1	1	1	2	0	2	1
Q03695	Q03695	1	1	1	Uncharacterized protein YMR206W			1	1	1	1	1	1	1	1	1	1	1	0	0	0	1	0	0	0	0	0	0	0	0	0	1	0	1	0	1	0	0	0	0	0	0	1	1	1	1	1	1	1
Q03735	Q03735	1	1	1	RNA-binding protein NAB6	NAB6		1	1	1	1	1	0	1	1	1	0	0	1	1	1	1	0	0	0	1	1	1	1	1	0	1	1	1	1	0	1	1	1	1	0	0	1	0	1	1	1	0	0
Q03750	Q03750	2	2	2	Transcription initiation factor TFIID subunit 8	TAF8		1	2	2	2	2	2	2	1	2	2	2	1	2	2	2	1	0	0	1	2	2	2	2	0	2	2	2	1	0	2	2	2	1	0	0	2	2	2	1	2	2	2
Q03761	Q03761	2	2	2	Transcription initiation factor TFIID subunit 12	TAF12		1	2	2	2	2	0	2	0	1	1	0	0	1	0	0	0	0	0	0	1	0	0	2	0	2	1	0	1	0	2	1	1	1	0	0	2	0	2	0	1	1	0
Q03772	Q03772	4	4	4	Pre-mRNA-splicing factor CWC15	CWC15		1	4	4	4	0	3	2	0	2	1	1	0	1	3	1	0	1	0	0	2	2	2	1	2	2	2	2	1	1	2	2	3	1	0	1	0	3	2	0	2	1	1
Q03774	Q03774	2	2	2	tRNA (guanine-N(7)-)-methyltransferase non-catalytic subunit TRM82	TRM82		1	2	2	2	2	0	1	2	1	2	0	1	1	1	1	1	2	0	0	1	1	1	1	0	1	0	1	2	0	0	0	0	1	0	0	2	0	1	2	1	2	0
Q03785	Q03785	1	1	1	Serine/threonine-protein kinase VHS1	VHS1		1	1	1	1	0	0	0	1	0	0	0	1	0	0	0	0	0	0	0	0	0	0	1	1	0	0	0	0	1	0	0	0	1	0	1	0	0	0	1	0	0	0
Q03829	Q03829	1	1	1	Uncharacterized mitochondrial carrier YMR166C			1	1	1	1	0	0	0	0	0	0	0	0	0	0	0	0	1	0	0	0	0	0	0	0	0	0	0	0	0	0	0	0	0	0	0	0	0	0	0	0	0	0
Q03834	Q03834	1	1	1	DNA mismatch repair protein MSH6	MSH6		1	1	1	1	1	1	1	1	1	1	1	1	1	1	1	1	1	1	1	1	1	1	1	1	1	1	1	1	1	1	1	1	1	0	1	1	1	1	1	1	1	1
Q03835	Q03835	1	1	1	Monothiol glutaredoxin-3	GRX3		1	1	1	1	0	0	0	0	0	0	0	1	0	0	0	0	0	1	0	0	0	0	0	0	1	0	0	0	1	0	0	0	0	0	0	0	0	0	0	0	0	0
Q03898	Q03898	3	3	3	Filament protein FIN1	FIN1		1	3	3	3	0	0	1	1	1	1	1	1	1	0	0	1	2	2	1	1	1	0	2	0	1	1	1	1	0	1	1	1	2	0	1	0	0	1	1	1	1	1
Q03937	Q03937	7	7	7	Meiosis-specific protein HED1	HED1		1	7	7	7	1	0	1	0	0	1	0	1	0	0	0	1	1	3	1	1	1	0	4	0	0	1	1	2	0	1	1	0	2	1	1	1	0	1	0	0	1	0
Q03940	Q03940	1	1	1	RuvB-like protein 1	RVB1		1	1	1	1	1	0	0	0	0	0	0	0	1	0	0	0	0	0	0	0	0	0	0	0	0	0	0	0	0	0	0	0	0	0	0	1	0	0	0	0	0	0
Q03973	Q03973	14	14	14	High mobility group protein 1	HMO1		1	14	14	14	9	8	10	6	6	7	5	5	6	6	6	4	3	7	7	3	4	4	3	3	3	5	3	3	3	4	5	4	4	2	3	9	8	10	6	6	7	5
Q03981	Q03981	1	1	1	COP9 signalosome complex subunit 9	CSN9		1	1	1	1	0	0	0	1	0	0	0	1	0	0	0	1	0	0	0	0	0	0	1	0	0	0	0	1	0	0	0	0	1	0	0	0	0	0	1	0	0	0
Q04002	Q04002	2	2	2	Sister chromatid cohesion protein 2	SCC2		1	2	2	2	0	0	0	0	0	0	1	0	0	0	0	0	1	1	0	1	0	1	1	0	0	1	0	0	1	1	0	1	2	0	0	0	0	0	0	0	0	1
Q04031	Q04031	2	2	2	Ribosomal RNA-processing protein 17	RRP17		1	2	2	2	2	1	1	1	1	0	0	2	2	0	0	1	0	0	1	1	0	1	1	0	1	0	1	0	0	1	0	1	0	0	0	2	1	1	1	1	0	0
Q04062	Q04062	1	1	1	26S proteasome regulatory subunit RPN9	RPN9		1	1	1	1	0	0	0	1	0	0	0	1	0	0	0	1	0	0	0	0	0	0	1	0	1	0	0	1	0	0	0	0	1	0	0	0	0	0	1	0	0	0
Q04087	Q04087	21	21	21	Monopolin complex subunit LRS4	LRS4		1	21	21	21	10	14	13	7	12	9	8	9	11	11	9	9	10	9	12	10	9	8	8	7	6	8	5	7	2	9	2	6	4	1	2	10	14	13	7	12	9	8
Q04110	Q04110	41	41	41	Protein ECM11	ECM11		1	41	41	41	1	3	3	2	2	3	3	3	11	12	12	17	13	12	24	34	27	30	24	20	29	33	30	23	14	31	31	29	21	9	16	1	3	3	2	2	3	3
;346120;346121;346122;346123;346124;346125;346126;346127;346128;346129;346130;346131;346132;346133;346134;346135;346136;346137;346138;346139;346140;346141;346142;346143;346144;346145;346146;346147;346148;346149;346150;346151;346152;346153;346154;346155;346156;346157;346158;346159;346160;346161;346162;346163;346164;346165;346166;346167;346168;346169;346170;346171;346172;346173;346174;346175;346176…
9;350800;350801;350802;350803;350804;350805;350806;350807;350808;350809;350810;350811;350812;350813;350814;350815;350816;350817;350818;350819;350820;350821;350822;350823;350824;350825;350826;350827;350828;350829;350830;350831;350832;350833;350834;350835;350836;350837;350838;350839;350840;350841;350842;350843;350844;350845;350846;350847;350848;350849;350850;350851;350852;350853;350854;350855;35085…	1771;28585;29278;48460;50844;54691;54966;90243;110686;138158;138246;151519;155816;155820;171174;173338;176278;176485;187912;213035;226359;255826;294745;294806;314444;314591;315517;315620;324159;325745;325746;325776;331732;345839;346796;350685;351678;367813;367839;383033;396200	2055;2056;2057;2058;2059;2060;2061;2062;2063;2064;2065;2066;2067;2068;2069;2070;2071;2072;2073;2074;2075	389;390	127;128;129;130;131;132;133;134;135;136;238;239;240;241;242;243;244;283;284	5;20;25;31;51;55;60;88;101;115;116;127;138;143;144;146;160;173;175;196;292	1;210	2;6;9;10;13;15;16;19;22;24;111;130;134;159;162;168;169;170;176
Q04119	Q04119	2	2	2	Endopolyphosphatase	PPN1		1	2	2	2	0	0	1	0	1	1	1	0	1	1	1	0	0	2	0	1	1	1	0	1	1	1	1	0	1	1	1	1	0	0	1	0	0	1	0	1	1	1
Q04120	Q04120	1	1	1	Peroxiredoxin TSA2	TSA2		1	1	1	1	0	0	0	0	1	0	1	0	1	1	1	0	0	0	0	1	1	1	0	0	1	1	1	0	0	0	1	1	0	0	0	0	0	0	0	1	0	1
Q04195	Q04195	5	5	5	E3 SUMO-protein ligase SIZ1	SIZ1		1	5	5	5	2	2	2	1	2	2	1	3	1	0	1	2	1	2	1	3	1	1	4	0	2	1	1	3	0	2	1	1	3	0	0	2	2	2	1	2	2	1
Q04235	Q04235	1	1	1	tRNA wybutosine-synthesizing protein 2	TRM12		1	1	1	1	0	0	0	1	0	0	0	0	0	0	0	0	0	0	0	0	0	0	0	0	0	0	0	1	0	0	0	0	0	0	0	0	0	0	1	0	0	0
Q04264	Q04264	5	5	5	Sister chromatid cohesion protein PDS5	PDS5		1	5	5	5	1	0	0	1	1	1	1	1	2	1	1	3	2	2	3	2	2	0	2	1	0	2	3	1	1	1	1	1	1	0	1	1	0	0	1	1	1	1
Q04299	Q04299	7	7	7	Probable ADP-ribose 1-phosphate phosphatase YML087W			1	7	7	7	4	4	7	5	1	3	3	4	3	3	2	3	1	1	0	3	1	2	2	0	2	2	3	3	0	4	1	2	4	0	1	4	4	7	5	1	3	3
Q04344	Q04344	12	12	12	Hit family protein 1	HNT1		1	12	12	12	10	9	9	9	7	7	9	8	7	8	9	4	5	2	0	9	8	8	7	5	9	9	9	8	5	10	9	9	8	4	5	10	9	9	9	7	7	9
Q04371	Q04371	2	2	2	Protein-glutamate O-methyltransferase			1	2	2	2	0	0	1	0	1	0	0	0	1	1	0	1	1	1	0	1	1	0	1	1	0	1	1	0	1	1	1	0	1	0	1	0	0	1	0	1	0	0
Q04399	Q04399	4	4	4	Putative multicopper oxidase GMC1	GMC1		1	4	4	4	0	0	0	0	0	0	0	2	0	0	0	1	0	1	0	0	0	0	1	1	0	0	0	2	0	1	1	0	0	0	0	0	0	0	0	0	0	0
Q04409	Q04409	2	2	2	Putative glucokinase-2	EMI2		1	2	2	2	0	0	0	1	0	0	1	2	2	1	2	0	0	0	0	0	0	1	1	0	0	1	0	0	0	1	0	1	1	0	0	0	0	0	1	0	0	1
Q04412	Q04412	7	7	7	ADP-ribosylation factor GTPase-activating protein effector protein 1	AGE1		1	7	7	7	2	2	1	3	0	0	1	0	2	1	1	0	1	2	3	0	0	0	0	0	0	1	1	1	0	1	0	0	0	0	0	2	2	1	3	0	0	1
Q04418	Q04418	2	2	2	RNA polymerase II-associated protein RBA50	RBA50		1	2	2	2	1	0	1	2	0	1	0	2	1	0	0	0	0	1	1	1	1	1	1	0	1	1	1	0	0	0	0	1	2	0	0	1	0	1	2	0	1	0
Q04437	Q04437	1	1	1	ATP-dependent DNA helicase II subunit 2	YKU80		1	1	1	1	0	0	0	0	0	0	0	1	0	0	0	1	0	1	0	0	0	0	1	0	0	0	0	1	0	0	0	0	0	0	0	0	0	0	0	0	0	0
Q04438	Q04438	6	6	6	Stationary phase protein 4	SPG4		1	6	6	6	2	1	1	2	1	1	1	3	1	1	1	0	1	0	2	2	1	2	6	0	0	0	0	1	0	0	0	1	0	0	0	2	1	1	2	1	1	1
Q04461	Q04461	4	4	4	Uncharacterized protein YMR111C			1	4	4	4	2	2	2	2	2	2	2	2	2	2	2	2	1	3	1	2	2	2	2	1	2	2	2	2	1	2	2	2	2	0	1	2	2	2	2	2	2	2
Q04511	Q04511	1	1	1	Ubiquitin ligase complex F-box protein UFO1	UFO1		1	1	1	1	0	0	1	0	0	0	0	0	0	0	0	0	0	0	0	0	0	0	0	0	0	0	0	0	0	0	0	0	0	0	0	0	0	1	0	0	0	0
Q04603	Q04603	1	1	1	DNA polymerase epsilon subunit D	DPB4		1	1	1	1	0	0	0	0	0	0	0	0	0	0	0	1	0	0	1	0	0	0	1	0	0	0	0	0	0	0	0	0	0	0	0	0	0	0	0	0	0	0
Q04636	Q04636	4	4	4	FACT complex subunit POB3	POB3		1	4	4	4	4	4	4	3	4	4	4	4	4	4	3	3	4	3	3	4	3	4	4	4	4	4	4	4	3	3	4	4	3	0	3	4	4	4	3	4	4	4
Q04689	Q04689	11	11	11	Altered inheritance of mitochondria protein 32	AIM32		1	11	11	11	7	8	10	10	7	6	8	8	6	5	7	7	2	4	0	6	7	5	8	1	4	5	5	7	1	5	4	5	7	2	1	7	8	10	10	7	6	8
Q04792	Q04792	10	10	10	Glutamate decarboxylase	GAD1		1	10	10	10	3	5	6	6	1	3	3	4	2	1	1	3	3	0	1	5	2	0	2	1	0	1	2	2	0	3	2	0	3	0	2	3	5	6	6	1	3	3
Q04869	Q04869	1	1	1	Uncharacterized protein YMR315W			1	1	1	1	0	0	0	0	0	0	1	0	0	0	0	0	0	0	0	0	0	0	0	0	0	0	0	0	0	0	0	0	0	0	0	0	0	0	0	0	0	1
Q04947	Q04947	1	1	1	Reticulon-like protein 1	RTN1		1	1	1	1	0	0	0	0	0	0	0	0	0	0	0	0	1	0	1	1	1	0	1	0	0	0	0	0	0	0	1	0	1	0	0	0	0	0	0	0	0	0
Q04958	Q04958	3	3	3	Lysophospholipase NTE1	NTE1		1	3	3	3	0	0	0	0	0	0	0	0	1	0	0	0	0	2	0	0	0	0	0	0	0	0	0	0	0	0	0	0	0	0	0	0	0	0	0	0	0	0
Q04964	Q04964	4	4	4	Ribonucleotide reductase inhibitor protein SML1	SML1		1	4	4	4	1	1	1	0	0	0	0	0	1	0	0	0	0	0	1	0	1	0	4	0	1	1	1	0	0	1	0	0	0	0	0	1	1	1	0	0	0	0
Q05016	Q05016	2	2	2	Uncharacterized oxidoreductase YMR226C			1	2	2	2	0	0	0	1	0	0	1	1	1	1	1	0	0	0	1	0	0	1	0	0	1	1	0	0	0	0	1	1	0	0	0	0	0	0	1	0	0	1
Q05021	Q05021	2	2	2	Transcription initiation factor TFIID subunit 7	TAF7		1	2	2	2	2	1	1	2	1	1	2	2	2	1	1	1	2	1	2	1	1	1	2	1	1	2	1	2	2	2	2	2	2	0	1	2	1	1	2	1	1	2
Q05024	Q05024	10	10	10	Protein TRI1	TRI1		1	10	10	10	7	5	4	4	4	3	4	4	5	4	5	5	5	4	5	8	7	5	5	3	8	8	6	5	3	9	7	7	7	1	3	7	5	4	4	4	3	4
Q05043	Q05043	6	6	6	Respiration factor 1	RSF1		1	6	6	6	5	1	1	1	2	1	2	1	3	1	1	2	1	1	3	2	3	1	4	0	4	1	1	1	0	2	2	1	1	0	1	5	1	1	1	2	1	2
Q05050	Q05050	2	2	2	Eisosome protein 1	EIS1		1	2	2	2	0	0	0	0	0	0	0	1	1	0	0	2	0	1	2	0	1	0	1	0	0	0	0	2	1	1	0	0	2	0	0	0	0	0	0	0	0	0
Q05471	Q05471	4	4	4	Helicase SWR1	SWR1		1	4	4	4	0	0	0	0	0	0	0	0	0	0	0	0	0	2	1	0	0	0	0	0	0	0	0	1	0	0	0	0	1	0	0	0	0	0	0	0	0	0
Q05506	Q05506	1	1	1	Arginine--tRNA ligase, cytoplasmic			1	1	1	1	0	0	0	0	0	1	1	0	1	0	0	0	0	0	0	0	0	0	0	0	1	1	0	0	1	0	0	0	0	0	0	0	0	0	0	0	1	1
Q05543	Q05543	1	1	1	Regulator of Ty1 transposition protein 103	RTT103		1	1	1	1	0	0	0	0	0	0	0	0	0	0	0	0	0	1	0	0	0	0	0	0	0	0	0	0	0	0	0	0	1	0	0	0	0	0	0	0	0	0
Q05549	Q05549	3	3	3	Putative ATP-dependent helicase HRQ1	HRQ1		1	3	3	3	2	0	1	2	2	1	1	2	2	1	3	2	1	1	2	2	2	2	2	2	2	3	2	2	1	2	2	1	2	0	1	2	0	1	2	2	1	1
Q05580;P53823;P43544	Q05580	10;1;1	10;1;1	10;1;1	E3 ubiquitin-protein ligase HEL2	HEL2		3	10	10	10	5	6	6	7	2	4	2	2	2	1	4	2	3	1	1	3	2	1	3	2	1	1	1	4	0	2	1	1	3	1	2	5	6	6	7	2	4	2
Q05610	Q05610	1	1	1	Donuts protein 1	DON1		1	1	1	1	0	0	0	0	0	0	0	0	0	0	0	1	0	0	1	0	0	0	1	0	0	0	0	1	0	0	0	0	1	0	0	0	0	0	0	0	0	0
Q05775	Q05775	3	3	3	Eukaryotic translation initiation factor 3 subunit J	HCR1		1	3	3	3	1	1	1	1	1	1	1	1	1	1	1	1	1	1	2	1	1	1	2	0	1	1	1	1	1	1	1	1	1	0	1	1	1	1	1	1	1	1
Q05854	Q05854	1	1	1	Uncharacterized transcriptional regulatory protein YLR278C			1	1	1	1	0	1	0	1	1	0	0	1	1	1	1	1	0	0	1	1	0	0	0	0	0	0	1	0	0	0	0	0	0	0	0	0	1	0	1	1	0	0
Q05900	Q05900	8	8	8	U1 small nuclear ribonucleoprotein C	YHC1		1	8	8	8	3	3	4	5	3	3	4	7	2	3	3	2	3	4	3	2	3	2	4	3	3	3	3	5	3	2	3	2	6	2	3	3	3	4	5	3	3	4
Q05911	Q05911	3	3	3	Adenylosuccinate lyase	ADE13		1	3	3	3	1	0	1	1	1	2	1	1	1	1	2	2	1	0	0	1	1	1	2	0	1	1	1	1	1	1	1	1	1	0	0	1	0	1	1	1	2	1
Q05937	Q05937	1	1	1	Zinc finger protein STP3	STP3		1	1	1	1	0	0	0	0	0	0	0	0	0	0	0	0	0	1	0	0	0	0	0	0	0	0	0	0	0	0	0	0	0	0	0	0	0	0	0	0	0	0
Q06001	Q06001	1	1	1	Factor arrest protein 10	FAR10		1	1	1	1	0	0	0	0	1	1	1	0	1	1	1	0	0	0	0	1	1	1	1	0	1	1	1	0	0	1	1	1	0	0	1	0	0	0	0	1	1	1
Q06010	Q06010	6	6	6	A-factor-processing enzyme	STE23		1	6	6	6	2	3	2	1	2	2	1	1	1	2	1	1	0	1	1	1	2	2	1	1	2	1	2	2	1	1	2	1	2	0	1	2	3	2	1	2	2	1
Q06032	Q06032	17	17	17	Chromosome stability protein 9	CST9		1	17	17	17	0	0	0	1	3	5	3	5	7	7	8	7	5	5	8	13	10	9	11	6	10	12	14	11	5	11	10	9	6	2	4	0	0	0	1	3	5	3
Q06106	Q06106	1	1	1	Multiple RNA-binding domain-containing protein 1	MRD1		1	1	1	1	0	0	0	0	0	0	0	0	0	0	0	0	0	1	0	0	0	0	0	0	0	0	0	0	0	0	0	0	0	0	0	0	0	0	0	0	0	0
Q06137	Q06137	2	2	2	Putative 6-phosphofructo-2-kinase/fructose-2,6-bisphosphatase YLR345W;6-phosphofructo-2-kinase;Fructose-2,6-bisphosphatase	YLR345W		1	2	2	2	0	0	0	1	0	0	0	1	0	0	0	0	1	1	0	0	0	0	0	0	0	0	0	1	0	0	0	0	1	0	0	0	0	0	1	0	0	0
Q06151	Q06151	11	10	10	m7GpppX diphosphatase	DCS1		1	11	10	10	5	4	8	7	5	7	7	5	5	5	6	4	4	4	1	4	7	4	5	4	5	3	6	4	3	4	6	2	8	2	2	5	4	7	6	5	7	7
Q06156	Q06156	4	4	4	Condensin complex subunit 1	YCS4		1	4	4	4	2	1	2	2	2	1	1	2	2	2	1	3	2	1	3	2	3	1	1	0	1	3	2	2	0	3	2	1	1	0	0	2	1	2	2	2	1	1
Q06164	Q06164	1	1	1	E3 ubiquitin-protein ligase substrate receptor MMS22	MMS22		1	1	1	1	0	1	0	0	0	0	0	1	0	0	0	0	0	0	0	0	0	1	0	0	1	0	0	0	1	1	0	0	0	0	0	0	1	0	0	0	0	0
Q06177	Q06177	3	3	3	Translation machinery-associated protein 10	TMA10		1	3	3	3	1	1	1	3	0	1	0	2	1	0	0	1	0	2	0	0	0	0	2	0	1	1	0	1	1	0	0	1	1	0	0	1	1	1	3	0	1	0
Q06178;P53204	Q06178	23;7	23;7	23;7	Nicotinamide/nicotinic acid mononucleotide adenylyltransferase 1	NMA1		2	23	23	23	8	12	13	17	6	8	11	11	4	8	8	6	1	5	8	3	10	6	5	1	4	4	5	11	1	4	6	6	7	1	2	8	12	13	17	6	8	11
Q06188	Q06188	4	4	4	PWWP domain-containing protein YLR455W	YLR455W		1	4	4	4	3	2	3	4	4	3	3	3	2	2	3	4	3	3	4	3	3	2	4	3	2	3	2	3	2	4	3	3	4	1	3	3	2	3	4	4	3	3
Q06201	Q06201	6	6	6	Grand meiotic recombination cluster protein 2	GMC2		1	6	6	6	0	0	0	0	0	0	0	0	1	2	1	3	2	2	1	6	3	5	6	4	3	5	5	6	2	6	4	4	3	2	2	0	0	0	0	0	0	0
Q06252	Q06252	3	3	3	Uncharacterized protein YLR179C			1	3	3	3	0	0	0	0	0	0	1	0	0	0	1	1	0	2	1	0	0	0	1	0	1	1	0	0	1	0	0	0	0	0	0	0	0	0	0	0	0	1
Q06263	Q06263	1	1	1	Vacuolar protein sorting-associated protein VTA1	VTA1		1	1	1	1	1	0	1	1	1	0	1	1	1	0	1	1	1	0	1	1	1	0	1	0	0	0	1	1	1	1	0	1	1	0	0	1	0	1	1	1	0	1
Q06266	Q06266	1	1	1	Protein TOS4	TOS4		1	1	1	1	0	0	0	0	0	1	0	0	0	0	0	0	0	0	0	0	0	0	1	0	0	0	0	0	0	0	0	0	0	0	0	0	0	0	0	0	1	0
Q06340	Q06340	1	1	1	Protein ESC2	ESC2		1	1	1	1	0	0	0	0	0	0	0	0	0	0	0	0	0	0	1	0	0	0	0	0	0	0	1	0	0	0	0	0	0	0	0	0	0	0	0	0	0	0
Q06344	Q06344	4	4	4	Pre-rRNA-processing protein ESF1	ESF1		1	4	4	4	2	0	1	2	1	0	1	1	0	1	1	1	0	2	2	1	0	2	1	0	1	0	1	0	0	1	1	0	0	0	0	2	0	1	2	1	0	1
Q06405	Q06405	7	7	7	ATP synthase subunit f, mitochondrial	ATP17		1	7	7	7	2	3	3	2	3	4	3	3	3	4	4	2	3	3	2	2	3	4	3	1	4	3	3	3	2	1	3	3	4	2	0	2	3	3	2	3	4	3
Q06436	Q06436	2	2	2	RING-finger protein MAG2	MAG2		1	2	2	2	1	1	1	2	0	1	1	2	1	0	0	2	2	1	1	1	1	0	2	2	1	1	1	2	0	1	1	1	2	0	1	1	1	1	2	0	1	1
Q06479	Q06479	3	3	3	F-box protein YLR352W	YLR352W		1	3	3	3	1	1	1	2	0	1	0	2	0	1	0	3	1	1	0	0	0	0	2	1	0	1	0	2	0	0	1	0	1	0	0	1	1	1	2	0	1	0
Q06488	Q06488	7	7	7	Chromatin structure-remodeling complex subunit RSC2	RSC2		1	7	7	7	2	3	3	2	3	2	3	3	2	3	2	1	1	3	4	2	2	3	2	1	2	3	1	2	1	2	2	3	2	0	1	2	3	3	2	3	2	3
Q06497	Q06497	3	3	3	Peroxisomal adenine nucleotide transporter 1	ANT1		1	3	3	3	1	1	0	1	1	2	1	1	0	1	1	1	0	0	0	1	2	2	0	1	2	1	2	0	1	1	1	2	2	0	0	1	1	0	1	1	2	1
Q06505	Q06505	2	2	2	Transcription factor SPN1	SPN1		1	2	2	2	1	0	0	0	0	1	0	1	0	1	0	0	0	2	1	0	0	0	0	0	0	0	1	1	0	0	0	0	0	0	1	1	0	0	0	0	1	0
Q06506	Q06506	2	2	2	Ribosomal RNA-processing protein 9	RRP9		1	2	2	2	0	0	1	0	0	0	0	0	0	0	0	0	0	1	0	0	0	0	0	0	0	0	0	0	0	0	0	0	0	0	0	0	0	1	0	0	0	0
Q06511	Q06511	1	1	1	Ribosomal RNA-processing protein 15	RRP15		1	1	1	1	1	1	1	1	1	1	1	1	1	1	1	1	1	1	1	1	1	1	1	1	1	1	1	1	1	1	1	1	1	1	1	1	1	1	1	1	1	1
Q06512	Q06512	1	1	1	Nucleolar complex protein 4	NOC4		1	1	1	1	0	0	0	0	1	0	0	0	0	0	0	0	0	0	0	0	0	0	0	0	0	0	0	0	0	0	0	0	0	0	0	0	0	0	0	1	0	0
Q06524	Q06524	1	1	1	Protein SUE1, mitochondrial	SUE1		1	1	1	1	0	0	1	0	0	0	1	0	0	0	0	0	0	0	0	1	0	0	0	0	0	1	0	0	0	0	0	0	0	0	0	0	0	1	0	0	0	1
Q06554	Q06554	1	1	1	Uncharacterized ATP-dependent helicase IRC20	IRC20		1	1	1	1	0	0	0	0	0	0	0	0	0	0	0	0	1	0	0	0	0	0	0	0	0	0	0	0	0	0	0	0	0	0	0	0	0	0	0	0	0	0
Q06604	Q06604	2	2	2	Protein BSP1	BSP1		1	2	2	2	1	0	0	1	0	0	0	1	1	0	0	0	1	0	0	0	0	0	2	0	1	0	0	1	0	0	0	0	1	0	0	1	0	0	1	0	0	0
Q06616	Q06616	2	2	2	Nuclear envelope protein YPR174C	YPR174C		1	2	2	2	1	1	1	1	1	1	1	1	2	1	1	2	1	1	2	1	1	1	1	1	1	1	2	0	1	1	1	1	0	0	1	1	1	1	1	1	1	1
Q06624	Q06624	7	7	7	DNA damage tolerance protein RHC31	AOS1		1	7	7	7	2	2	2	3	2	2	2	3	2	2	2	3	2	3	4	2	2	2	3	2	2	2	2	3	2	3	2	3	3	2	2	2	2	2	3	2	2	2
Q06625	Q06625	4	4	4	Glycogen debranching enzyme;4-alpha-glucanotransferase;Amylo-alpha-1,6-glucosidase	GDB1		1	4	4	4	1	1	1	1	1	1	1	1	1	1	1	1	3	2	1	1	1	1	1	1	1	1	1	1	0	1	1	0	2	2	2	1	1	1	1	1	1	1
Q06629	Q06629	1	1	1	HDA1 complex subunit 2	HDA2		1	1	1	1	0	0	0	0	0	0	0	0	0	0	0	0	0	0	0	0	0	0	0	0	0	0	1	0	0	0	0	0	0	0	0	0	0	0	0	0	0	0
Q06680	Q06680	2	2	2	Condensin complex subunit 3	YCG1		1	2	2	2	0	0	0	0	0	0	0	0	0	0	0	0	0	2	0	0	0	0	0	0	0	0	0	0	0	0	1	0	0	0	0	0	0	0	0	0	0	0
Q06683	Q06683	3	3	3	Putative ATP-dependent helicase IRC3	IRC3		1	3	3	3	0	1	0	0	0	0	0	0	1	1	1	0	1	1	1	1	1	1	1	2	1	1	1	0	1	1	1	1	0	0	2	0	1	0	0	0	0	0
Q06703	Q06703	3	3	3	Chitin deacetylase 2	CDA2		1	3	3	3	0	0	0	0	0	0	0	0	0	0	1	0	0	0	0	1	0	0	0	0	0	0	1	1	0	1	1	1	3	2	1	0	0	0	0	0	0	0
Q06705	Q06705	3	3	3	Phosphatidylinositol transfer protein CSR1	CSR1		1	3	3	3	2	1	1	2	2	1	2	2	2	1	1	1	1	0	0	0	1	0	2	1	1	0	1	2	1	0	1	0	1	0	0	2	1	1	2	2	1	2
Q06706	Q06706	1	1	1	Elongator complex protein 1	IKI3		1	1	1	1	0	0	0	0	1	0	0	0	0	0	0	0	0	0	1	1	0	0	0	0	0	0	0	1	0	0	0	0	0	1	0	0	0	0	0	1	0	0
Q07349	Q07349	1	1	1	Uncharacterized protein YDL027C			1	1	1	1	0	0	0	0	0	0	0	0	0	0	0	0	0	0	0	0	0	0	0	0	0	0	0	0	0	1	0	0	0	0	0	0	0	0	0	0	0	0
Q07351	Q07351	2	2	2	Zinc finger protein STP4	STP4		1	2	2	2	0	1	2	1	1	1	0	0	0	0	0	0	0	0	0	0	0	0	0	0	0	0	0	0	0	0	0	0	0	0	0	0	1	2	1	1	1	0
Q07381	Q07381	3	3	3	Ribosome biogenesis protein TSR1	TSR1		1	3	3	3	0	1	1	2	0	0	0	0	0	0	0	0	2	0	0	0	0	0	0	0	0	0	0	0	0	0	0	0	1	0	0	0	1	1	2	0	0	0
Q07478	Q07478	6	6	6	ATP-dependent RNA helicase SUB2	SUB2		1	6	6	6	0	0	1	1	1	1	2	2	2	2	2	1	0	2	3	0	2	1	2	0	2	2	1	2	2	0	2	2	1	0	1	0	0	1	1	1	1	2
Q07505	Q07505	3	3	3	Putative carboxymethylenebutenolidase	YDL086W		1	3	3	3	0	0	0	0	0	0	0	0	0	0	0	0	0	3	0	0	0	0	0	0	0	0	0	0	0	0	0	0	0	0	0	0	0	0	0	0	0	0
Q07532	Q07532	1	1	1	RNA polymerase II nuclear localization protein IWR1	IWR1		1	1	1	1	0	0	0	0	0	0	0	0	0	0	0	0	0	1	0	0	0	0	0	0	0	0	0	0	0	0	0	0	0	0	0	0	0	0	0	0	0	0
Q07551	Q07551	1	1	1	NADPH-dependent alpha-keto amide reductase			1	1	1	1	0	0	0	0	0	0	1	0	0	0	0	0	0	0	0	0	0	0	0	0	0	0	0	0	0	0	0	0	0	0	0	0	0	0	0	0	0	1
Q07653	Q07653	52	52	52	Protein HBT1	HBT1		1	52	52	52	27	22	31	32	33	32	42	28	28	28	33	27	33	28	40	28	30	28	28	20	17	29	26	33	18	19	27	28	32	16	21	27	22	31	32	33	32	42
27675;327676;327677;327678;327679;327680;327681;327682;327683;327684;327685;327686;327687;327688;327689;327690;327691;327692;327693;327694;327695;327696;327697;327698;327699;327700;327701;327702;327703;327704;327705;327706;327707;327708;327709;327710;327711;327712;327713;327714;327715;327716;327717;327718;327719;327720;327721;327722;327723;327724;327725;327726;327727;327728;327729;327730;327731;3…	1854;2023;20295;28151;32343;32545;32554;38023;38042;47511;59777;62826;62837;99074;108935;156062;226921;227396;233327;233363;233401;235904;240957;248622;249690;264446;264461;289481;289545;290134;293155;293460;294654;301554;305401;306302;309472;313475;318907;320367;328061;335162;335252;338650;342183;342878;342958;342980;362606;368214;368215;382391		415;416;417;418;419;420;421	160;161;162;254		315;341;408;507;521;760;960	44;251;956;1034
Q07655;P34761	Q07655	9;1	9;1	9;1	Protein WHI4	WHI4		2	9	9	9	4	4	6	7	3	4	3	5	4	3	3	2	3	1	3	4	4	2	5	2	2	3	3	5	2	3	2	3	4	1	2	4	4	6	7	3	4	3
Q07657	Q07657	7	7	7	Seventh homolog of septin 1	SHS1		1	7	7	7	5	7	5	6	3	4	4	6	3	3	3	5	0	0	7	5	4	2	6	1	5	3	2	5	1	5	3	2	5	1	0	5	7	5	6	3	4	4
Q07716	Q07716	1	1	1	Altered inheritance of mitochondria protein 6	AIM6		1	1	1	1	1	0	1	0	1	1	1	1	1	1	1	1	0	0	0	1	1	1	1	1	1	1	1	1	1	0	1	1	1	0	1	1	0	1	0	1	1	1
Q07807	Q07807	7	7	7	mRNA-binding protein PUF3	PUF3		1	7	7	7	5	6	6	5	3	5	4	4	5	5	3	3	4	2	1	5	5	2	3	3	4	4	3	4	3	5	5	2	5	2	4	5	6	6	5	3	5	4
Q07825	Q07825	3	3	3	Putative Xaa-Pro aminopeptidase FRA1	FRA1		1	3	3	3	2	2	2	1	2	2	2	1	2	2	1	0	1	1	0	2	2	2	1	1	2	2	2	2	1	1	2	2	2	0	1	2	2	2	1	2	2	2
Q07830	Q07830	1	1	1	GPI ethanolamine phosphate transferase 3	GPI13		1	1	1	1	0	0	0	0	0	0	0	0	0	1	0	0	0	0	0	0	0	0	0	0	0	0	0	0	0	0	0	0	0	0	0	0	0	0	0	0	0	0
Q07938	Q07938	4	4	4	S-methyl-5-thioadenosine phosphorylase	MEU1		1	4	4	4	2	3	2	2	2	3	3	3	2	3	2	1	0	0	0	1	2	2	2	0	0	2	3	3	0	1	2	1	2	0	0	2	3	2	2	2	3	3
Q07979	Q07979	5	5	5	Chromatin structure-remodeling complex protein RSC58	RSC58		1	5	5	5	3	2	3	4	4	3	3	3	4	3	4	4	3	4	3	4	3	3	4	3	4	2	3	3	2	3	3	3	4	1	3	3	2	3	4	4	3	3
Q08001	Q08001	1	1	1	Uncharacterized protein YLR072W	YLR072W		1	1	1	1	0	0	1	1	0	0	0	1	0	0	0	0	0	0	0	0	0	0	1	0	0	0	0	1	0	0	0	0	0	0	0	0	0	1	1	0	0	0
Q08179	Q08179	1	1	1	Mitochondrial distribution and morphology protein 38	MDM38		1	1	1	1	1	1	1	1	0	0	0	0	1	0	0	0	1	0	0	0	0	0	1	0	0	0	0	0	0	0	0	0	0	0	0	1	1	1	1	0	0	0
Q08204	Q08204	4	4	4	Structural maintenance of chromosomes protein 5	SMC5		1	4	4	4	1	1	1	1	0	1	1	1	1	1	1	1	1	1	3	2	2	1	1	1	1	1	2	1	1	3	2	2	1	1	2	1	1	1	1	0	1	1
Q08208	Q08208	7	7	7	Nucleolar protein 12	NOP12		1	7	7	7	4	2	1	2	0	0	0	0	1	0	0	1	2	5	0	0	1	0	3	0	0	2	1	0	1	0	1	0	2	0	0	4	2	1	2	0	0	0
Q08218	Q08218	2	2	2	Outer spore wall protein LDS2	LDS2		1	2	2	2	0	0	0	0	0	0	0	0	0	0	0	0	0	0	0	0	0	0	0	0	0	0	0	1	0	0	1	0	2	0	1	0	0	0	0	0	0	0
Q08225	Q08225	4	4	4	Probable dipeptidyl peptidase 3			1	4	4	4	1	0	1	1	0	0	0	2	1	0	0	0	1	1	2	2	1	0	0	1	2	2	1	1	1	1	0	1	3	0	1	1	0	1	1	0	0	0
Q08229	Q08229	1	1	1	Protein NBA1	NBA1		1	1	1	1	1	0	1	0	1	0	1	0	1	0	0	0	0	0	0	0	0	0	0	0	0	0	0	0	0	0	0	0	0	0	0	1	0	1	0	1	0	1
Q08245	Q08245	29	29	29	Protein ZEO1	ZEO1		1	29	29	29	22	19	19	22	20	18	16	26	20	18	18	22	14	12	24	17	21	16	25	12	20	17	16	25	15	17	19	19	21	10	13	22	19	19	22	20	18	16
Q08285	Q08285	1	1	1	Exosome complex component RRP40	RRP40		1	1	1	1	1	1	1	1	1	1	1	1	1	1	1	1	1	1	1	1	1	1	1	1	1	1	1	1	1	1	1	1	1	0	1	1	1	1	1	1	1	1
Q08412	Q08412	2	2	2	Ubiquitin-binding protein CUE5	CUE5		1	2	2	2	0	0	0	1	0	0	0	0	0	0	0	1	0	0	1	0	0	0	2	0	0	0	0	0	0	0	0	0	0	0	0	0	0	0	1	0	0	0
Q08465	Q08465	2	2	2	Protein YNG1	YNG1		1	2	2	2	0	1	2	1	1	2	0	1	2	0	0	0	1	1	1	1	0	0	1	0	0	0	0	1	0	0	0	2	0	0	0	0	1	2	1	1	2	0
Q08484	Q08484	3	3	3	GTPase-activating protein GYP1	GYP1		1	3	3	3	1	1	1	0	1	1	1	0	1	1	1	0	1	2	1	1	0	0	1	0	0	0	0	0	0	0	0	1	0	1	0	1	1	1	0	1	1	1
Q08490	Q08490	1	1	1	Shugoshin	SGO1		1	1	1	1	0	0	0	0	0	0	0	1	0	0	0	0	0	0	1	1	0	1	1	0	1	0	0	1	0	1	1	1	0	0	0	0	0	0	0	0	0	0
Q08561	Q08561	8	8	8	Ino eighty subunit 4	IES4		1	8	8	8	2	3	4	1	2	3	3	2	3	3	4	2	2	4	5	3	2	2	2	2	2	3	2	1	2	3	2	2	3	0	2	2	3	4	1	2	3	3
Q08562	Q08562	6	6	5	ATP-dependent helicase ULS1	ULS1		1	6	6	5	0	1	0	0	0	0	0	1	0	0	1	1	0	4	4	1	1	0	1	1	0	1	0	0	1	1	0	1	1	0	0	0	1	0	0	0	0	0
Q08581	Q08581	2	2	2	Kinetochore protein SLK19	SLK19		1	2	2	2	0	0	0	0	0	0	0	0	0	0	0	0	0	2	0	0	0	0	1	0	0	0	0	0	0	1	0	1	0	0	0	0	0	0	0	0	0	0
Q08689	Q08689	1	1	1	N-terminal acetyltransferase A complex subunit NAT5	NAT5		1	1	1	1	0	0	0	0	1	1	1	0	1	1	0	0	1	1	0	1	1	0	0	1	1	0	1	0	1	1	0	1	1	0	1	0	0	0	0	1	1	1
Q08692	Q08692	2	2	2	Outer spore wall protein 1	OSW1		1	2	2	2	0	0	0	0	0	0	0	0	0	0	0	0	0	0	0	0	0	0	0	0	0	0	0	0	0	0	1	1	2	0	0	0	0	0	0	0	0	0
Q08702	Q08702	6	6	6	Aprataxin-like protein	HNT3		1	6	6	6	1	2	3	3	2	2	3	4	1	2	2	4	2	1	0	2	2	2	5	2	1	2	1	4	3	1	2	2	3	1	1	1	2	3	3	2	2	3
Q08732	Q08732	33	33	33	Serine/threonine-protein kinase HRK1	HRK1		1	33	33	33	18	20	23	19	12	15	18	10	12	12	14	7	10	13	14	13	17	12	10	7	13	11	14	14	5	13	16	14	11	5	6	18	20	23	19	12	15	18
Q08745	Q08745	10	2	2	40S ribosomal protein S10-A	RPS10A		1	10	2	2	6	6	5	6	6	5	6	7	5	4	6	7	3	6	7	6	6	5	7	2	6	5	6	5	3	5	4	4	7	2	2	0	1	0	0	1	0	1
Q08747	Q08747	8	8	8	Upstream activation factor subunit UAF30	UAF30		1	8	8	8	3	3	5	4	3	2	3	2	3	4	2	5	2	1	6	3	2	1	1	1	2	4	3	1	0	3	3	3	2	0	0	3	3	5	4	3	2	3
Q08816	Q08816	1	1	1	Uncharacterized protein YOR352W	YOR352W		1	1	1	1	0	1	1	0	1	1	1	0	1	1	1	0	1	0	0	0	0	0	1	1	1	0	0	0	1	0	0	0	1	0	1	0	1	1	0	1	1	1
Q08831	Q08831	6	6	6	Protein VTS1	VTS1		1	6	6	6	3	2	1	2	2	2	2	2	1	2	2	0	2	4	3	1	1	1	1	1	1	2	1	1	2	1	1	1	0	0	1	3	2	1	2	2	2	2
Q08923	Q08923	1	1	1	Histone deacetylase complex subunit CTI6	CTI6		1	1	1	1	1	0	1	0	0	0	0	0	0	0	0	0	0	0	1	0	0	0	1	0	0	0	0	0	0	0	0	0	0	0	0	1	0	1	0	0	0	0
Q08949	Q08949	1	1	1	DNA damage checkpoint protein 1	DDC1		1	1	1	1	0	0	0	0	0	0	0	0	1	1	1	1	1	1	1	1	1	0	1	1	1	1	1	0	0	1	1	1	0	1	1	0	0	0	0	0	0	0
Q08951	Q08951	2	2	2	AP-3 complex subunit delta	APL5		1	2	2	2	0	0	0	1	0	0	0	0	1	0	0	0	0	1	1	0	0	0	0	1	1	0	0	0	0	0	1	1	0	0	0	0	0	0	1	0	0	0
Q08957	Q08957	3	3	3	Iron-regulated transcriptional activator AFT2	AFT2		1	3	3	3	3	2	2	2	3	3	2	2	3	3	2	2	0	0	2	2	2	2	2	1	2	2	1	1	0	2	2	2	1	0	1	3	2	2	2	3	3	2
Q08962	Q08962	1	1	1	60S ribosome subunit biogenesis protein NIP7	NIP7		1	1	1	1	0	0	0	0	1	1	1	0	1	1	1	0	0	1	0	0	1	1	0	0	1	0	0	0	0	0	1	1	0	0	0	0	0	0	0	1	1	1
Q08970	Q08970	4	4	4	Mitochondrial metal transporter 2	MMT2		1	4	4	4	3	2	4	1	1	3	2	1	2	1	1	1	0	1	0	0	0	0	1	0	0	0	0	0	0	0	0	1	1	0	0	3	2	4	1	1	3	2
Q08971	Q08971	1	1	1	Protein PBDC1 homolog	YPL225W		1	1	1	1	0	0	0	0	0	0	0	1	0	0	0	0	0	0	0	0	0	0	1	0	0	0	0	1	0	0	0	0	0	0	0	0	0	0	0	0	0	0
Q08977	Q08977	2	2	2	UPF0662 protein YPL260W	YPL260W		1	2	2	2	0	0	0	0	0	0	0	1	0	0	0	0	1	0	0	0	0	0	0	0	1	0	0	0	1	0	0	0	0	0	1	0	0	0	0	0	0	0
Q12012	Q12012	2	2	2	Uncharacterized protein YOR289W	YOR289W		1	2	2	2	0	0	0	0	2	2	2	0	2	2	1	0	0	1	0	1	2	1	0	1	1	2	1	0	1	2	2	1	0	1	1	0	0	0	0	2	2	2
Q12020	Q12020	1	1	1	Protein SRL2	SRL2		1	1	1	1	1	1	0	0	1	0	0	0	1	1	0	0	0	1	0	0	0	0	1	0	0	0	0	0	0	1	0	1	0	0	0	1	1	0	0	1	0	0
Q12040	Q12040	2	2	2	Broad-specificity phosphatase YOR283W	YOR283W		1	2	2	2	0	0	0	0	2	1	2	0	2	2	1	0	0	0	0	1	0	1	0	0	1	0	0	0	0	0	0	0	0	0	1	0	0	0	0	2	1	2
Q12044	Q12044	1	1	1	Regulator of calcineurin 2	RCN2		1	1	1	1	0	0	0	0	0	0	0	1	0	0	0	1	0	1	1	0	0	0	1	0	0	0	0	1	0	0	0	0	1	0	0	0	0	0	0	0	0	0
Q12050	Q12050	2	2	2	Telomere length regulation protein ELG1	ELG1		1	2	2	2	0	0	0	0	0	0	0	0	0	0	0	0	0	2	0	0	0	0	0	0	0	0	0	0	0	0	0	0	0	0	0	0	0	0	0	0	0	0
Q12056	Q12056	1	1	1	Iron sulfur cluster assembly protein 2, mitochondrial	ISU2		1	1	1	1	1	1	1	1	1	1	1	1	1	1	1	1	1	1	0	1	1	1	1	0	1	1	1	0	0	1	1	1	1	0	0	1	1	1	1	1	1	1
Q12063	Q12063	1	1	1	Dehydrodolichyl diphosphate syntase complex subunit NUS1	NUS1		1	1	1	1	0	0	1	1	0	0	1	1	0	0	0	0	0	0	0	1	1	1	1	0	1	1	1	1	0	1	1	1	1	0	0	0	0	1	1	0	0	1
Q12080	Q12080	4	4	4	Ribosome biogenesis protein NOP53	NOP53		1	4	4	4	0	0	0	0	0	0	0	0	0	0	0	0	0	4	0	0	0	0	1	0	0	0	0	0	0	0	0	0	0	0	0	0	0	0	0	0	0	0
Q12098	Q12098	2	2	2	Structure-specific endonuclease subunit SLX4	SLX4		1	2	2	2	0	0	0	0	0	0	0	0	0	0	0	0	0	2	1	0	0	0	0	0	0	0	0	0	0	0	0	0	0	0	0	0	0	0	0	0	0	0
Q12100	Q12100	17	17	17	Probable serine/threonine-protein kinase RTK1	RTK1		1	17	17	17	6	8	10	10	4	5	5	2	4	8	3	2	7	8	9	4	5	4	4	4	4	3	3	5	3	6	4	4	4	1	2	6	8	10	10	4	5	5
Q12123	Q12123	19	19	18	Inactive diphosphatase DCS2	DCS2		1	19	19	18	8	9	15	11	13	9	14	9	10	12	12	10	10	4	2	11	10	11	8	8	10	10	11	9	7	10	11	9	10	7	8	8	9	15	11	13	9	14
Q12128	Q12128	10	10	10	Rho-GTPase-activating protein BAG7	BAG7		1	10	10	10	3	1	2	2	1	2	3	2	1	1	5	2	1	6	3	1	1	1	1	2	0	1	1	1	0	1	2	1	0	0	1	3	1	2	2	1	2	3
Q12132	Q12132	3	3	3	Nutrient and stress factor 1	USV1		1	3	3	3	0	0	0	0	0	0	0	0	0	0	0	0	0	2	2	0	0	0	0	0	0	0	0	0	0	0	1	0	1	0	1	0	0	0	0	0	0	0
Q12134	Q12134	2	2	2	Protein HUA2	HUA2		1	2	2	2	0	1	0	1	0	0	0	1	0	0	0	1	2	0	1	0	0	0	1	0	0	0	0	0	0	0	0	0	1	0	0	0	1	0	1	0	0	0
Q12139	Q12139	1	1	1	Zinc finger protein YPR022C	YPR022C		1	1	1	1	1	0	1	0	0	0	0	0	1	0	1	0	0	1	1	1	0	0	0	1	1	0	1	0	0	1	0	1	0	0	1	1	0	1	0	0	0	0
Q12156	Q12156	2	2	2	Protein AIM7	AIM7		1	2	2	2	0	0	0	0	0	0	0	0	0	0	0	1	0	1	1	0	0	0	1	0	0	0	0	1	0	0	0	0	0	0	0	0	0	0	0	0	0	0
Q12157	Q12157	1	1	1	Anaphase-promoting complex subunit 11	APC11		1	1	1	1	1	1	1	1	1	1	1	1	1	1	1	1	1	1	1	1	1	1	1	1	1	1	1	1	1	1	1	1	1	1	1	1	1	1	1	1	1	1
Q12159	Q12159	5	5	5	RNA annealing protein YRA1	YRA1		1	5	5	5	1	2	1	2	2	1	1	2	2	0	0	1	1	3	3	2	1	0	3	0	1	1	2	1	1	2	2	1	2	0	0	1	2	1	2	2	1	1
Q12166	Q12166	1	1	1	2-isopropylmalate synthase 2, mitochondrial	LEU9		1	1	1	1	0	0	0	0	1	1	1	0	1	1	0	0	0	0	0	0	0	0	0	0	1	0	0	0	0	0	1	0	0	0	0	0	0	0	0	1	1	1
Q12175	Q12175	4	4	4	MutS protein homolog 5	MSH5		1	4	4	4	0	0	0	0	0	0	0	0	0	0	0	0	0	0	0	3	1	1	1	0	1	1	2	2	0	2	2	1	0	0	0	0	0	0	0	0	0	0
Q12184	Q12184	1	1	1	Adrenodoxin homolog, mitochondrial	YAH1		1	1	1	1	0	1	1	1	1	1	0	1	0	0	0	1	1	0	0	1	1	0	1	0	0	0	0	1	0	1	0	0	1	0	0	0	1	1	1	1	1	0
Q12188	Q12188	20	20	20	Meiotic recombination protein REC8	REC8		1	20	20	20	0	0	0	0	8	9	7	7	8	8	5	8	9	13	11	13	10	8	9	7	6	8	9	8	1	10	7	9	7	2	4	0	0	0	0	8	9	7
Q12202	Q12202	1	1	1	Outer spore wall protein 2	OSW2		1	1	1	1	0	0	0	0	0	0	0	0	0	0	0	0	0	0	0	0	1	0	0	0	0	0	0	1	0	0	1	1	1	1	1	0	0	0	0	0	0	0
Q12207	Q12207	1	1	1	Non-classical export protein 2	NCE102		1	1	1	1	0	0	0	0	0	0	0	0	0	0	0	0	0	1	0	0	0	0	0	0	0	0	0	0	0	0	0	0	0	0	0	0	0	0	0	0	0	0
Q12213	Q12213	13	1	1	60S ribosomal protein L7-B	RPL7B		1	13	1	1	2	3	5	4	3	2	3	5	2	3	3	4	1	8	4	2	3	2	7	4	4	2	2	5	2	3	3	3	3	0	2	0	0	0	0	0	0	0
Q12216	Q12216	6	6	6	E3 SUMO-protein ligase SIZ2	NFI1		1	6	6	6	1	2	1	2	3	3	1	3	1	2	3	3	2	2	2	3	2	2	5	0	2	3	2	2	0	3	3	2	3	0	0	1	2	1	2	3	3	1
Q12223	Q12223	9	9	9	DNA repair protein RAD59	RAD59		1	9	9	9	0	0	0	0	1	1	0	1	4	3	3	3	3	3	0	8	5	6	7	3	5	7	7	6	3	8	6	8	4	3	4	0	0	0	0	1	1	0
Q12230	Q12230	4	4	4	Sphingolipid long chain base-responsive protein LSP1	LSP1		1	4	4	4	2	1	2	3	2	1	1	0	2	1	2	1	0	0	3	2	2	1	3	1	2	1	2	2	2	2	2	2	2	0	0	2	1	2	3	2	1	1
Q12233	Q12233	1	1	1	ATP synthase subunit g, mitochondrial	ATP20		1	1	1	1	1	1	0	0	1	1	1	1	1	1	1	1	1	1	0	1	1	1	0	1	1	1	1	1	1	1	1	1	1	0	1	1	1	0	0	1	1	1
Q12234	Q12234	1	1	1	GRIP domain-containing protein RUD3	RUD3		1	1	1	1	0	0	0	0	0	0	0	0	0	0	0	0	0	1	0	0	0	0	0	0	0	0	0	0	0	0	0	0	0	0	0	0	0	0	0	0	0	0
Q12244	Q12244	1	1	1	Uncharacterized transcriptional regulatory protein YLL054C			1	1	1	1	1	1	1	1	1	1	1	1	1	1	1	1	1	1	1	1	1	1	1	0	1	1	1	1	0	1	1	1	1	0	0	1	1	1	1	1	1	1
Q12247	Q12247	1	1	1	rRNA-processing protein FYV7	FYV7		1	1	1	1	1	1	1	0	1	1	1	0	1	1	1	0	0	0	1	1	1	1	0	0	1	0	0	0	0	1	1	1	0	0	0	1	1	1	0	1	1	1
Q12250	Q12250	6	6	6	26S proteasome regulatory subunit RPN5	RPN5		1	6	6	6	0	1	1	2	0	0	0	2	2	0	0	2	3	2	4	2	0	1	3	2	2	2	2	2	1	2	2	2	2	0	1	0	1	1	2	0	0	0
Q12267	Q12267	15	15	15	Structural maintenance of chromosomes protein 4	SMC4		1	15	15	15	5	5	3	2	5	3	2	2	7	6	1	3	4	10	7	6	7	4	3	4	6	7	7	4	4	6	6	6	4	2	4	5	5	3	2	5	3	2
Q12272	Q12272	3	3	3	tRNA 2-phosphotransferase	TPT1		1	3	3	3	2	2	2	3	2	2	2	3	2	2	2	3	2	1	0	2	2	2	2	2	2	2	2	3	1	2	2	2	2	1	2	2	2	2	3	2	2	2
Q12283	Q12283	1	1	1	Malonyl CoA-acyl carrier protein transacylase, mitochondrial	MCT1		1	1	1	1	0	0	0	0	0	1	1	0	0	1	0	0	0	0	0	0	0	1	0	0	0	1	1	0	0	0	0	0	0	0	1	0	0	0	0	0	1	1
Q12289	Q12289	2	2	2	Mitochondrial carnitine carrier	CRC1		1	2	2	2	0	0	0	0	0	0	1	0	1	0	1	0	0	0	0	0	0	1	0	0	2	1	0	0	0	0	0	2	0	0	0	0	0	0	0	0	0	1
Q12296	Q12296	2	2	2	Protein MAM3	MAM3		1	2	2	2	0	2	1	1	0	1	0	1	0	0	0	1	1	1	0	1	1	0	1	0	2	1	2	1	1	2	1	0	1	0	0	0	2	1	1	0	1	0
Q12305	Q12305	3	3	3	Thiosulfate sulfurtransferase RDL1, mitochondrial	RDL1		1	3	3	3	0	0	0	0	0	0	1	1	0	0	1	1	0	1	0	0	0	0	1	0	0	0	0	1	0	0	0	0	0	0	0	0	0	0	0	0	0	1
Q12306;REV__Q12092	Q12306	29;1	29;1	28;1	Ubiquitin-like protein SMT3	SMT3		2	29	29	28	21	22	25	22	22	22	22	24	22	22	22	21	10	9	18	22	23	23	22	10	22	22	24	23	10	21	24	22	22	5	10	21	22	25	22	22	22	22
718;277719;277720;277721;277722;277723;277724;277725;277726;277727;277728;277729;277730;277731;277732;277733;277734;277735;277736;277737;277738;277739;277740;277741;277742;277743;277744;277745;277746;277747;277748;277749;277750;277751;277752;277753;277754;277755;277756;277757;277758;277759;277760;277761;277762;277763;277764;277765;277766;277767;277768;277769;277770;277771;277772;277773;277774;277…
2398;282399;282400;282401;282402;282403;282404;282405;282406;282407;282408;282409;282410;282411;282412;282413;282414;282415;282416;282417;282418;282419;282420;282421;282422;282423;282424;282425;282426;282427;282428;282429;282430;282431;282432;282433;282434;282435;282436;282437;282438;282439;282440;282441;282442;282443;282444;282445;282446;282447;282448;282449;282450;282451;282452;282453;282454;28…
40366;340367;340368;340369;340370;340371;340372;340373;340374;340375;340376;340377;340378;340379;340380;340381;340382;340383;340384;340385;340386;340387;340388;340389;340390;340391;340392;340393;340394;340395;340396;340397;340398;340399;340400;340401;340402;340403;340404;340405;340406;340407;340408;340409;340410;340411;340412;340413;340414;340415;340416;340417;340418;340419;340420;340421;340422;3…	3487;12733;14488;50042;50048;50052;183252;183634;183766;221184;262648;276196;276345;277853;282335;285672;321088;321390;339600;341069;341876;366344;366759;375994;376093;376221;380528;380848;380879	2327;2328;2329;2330;2331;2332;2333;2334;2335	440;441;442	174;175	11;15;19;27;38;40;41;54;58	49;60;83	2;4
Q12311	Q12311	1	1	1	NuA3 HAT complex component NTO1	NTO1		1	1	1	1	0	0	1	0	0	0	0	0	0	0	0	0	1	0	0	0	0	0	0	0	0	0	0	0	0	0	0	0	0	0	0	0	0	1	0	0	0	0
Q12314	Q12314	1	1	1	Protein arginine N-methyltransferase SFM1	SFM1		1	1	1	1	0	0	0	0	1	1	1	1	1	1	1	1	1	0	0	1	1	0	0	1	1	1	1	1	1	1	1	1	0	0	1	0	0	0	0	1	1	1
Q12320	Q12320	3	3	3	Hydroxyacylglutathione hydrolase, mitochondrial	GLO4		1	3	3	3	0	0	1	1	0	0	0	1	0	0	0	1	0	0	0	1	1	0	1	0	0	0	0	2	0	1	0	0	2	1	0	0	0	1	1	0	0	0
Q12321	Q12321	1	1	1	Mediator of RNA polymerase II transcription subunit 1	MED1		1	1	1	1	0	0	0	0	0	0	0	0	0	0	0	0	0	0	1	0	0	0	0	0	0	0	0	0	0	0	0	0	0	0	0	0	0	0	0	0	0	0
Q12329	Q12329	20	20	20	Heat shock protein 42	HSP42		1	20	20	20	6	7	11	9	8	8	14	12	7	8	10	7	5	1	4	7	9	10	9	2	8	10	8	13	4	11	15	15	12	3	4	6	7	11	9	8	8	14
Q12335	Q12335	5	5	5	Protoplast secreted protein 2	PST2		1	5	5	5	0	0	1	0	1	1	3	2	3	2	2	2	0	2	0	0	2	2	1	1	2	2	2	3	1	2	2	2	1	0	1	0	0	1	0	1	1	3
Q12354	Q12354	3	3	3	Acyl-protein thioesterase 1			1	3	3	3	2	2	2	1	2	2	2	1	2	2	1	1	1	1	2	1	1	2	2	1	1	1	1	2	2	1	2	1	2	0	1	2	2	2	1	2	2	2
Q12363	Q12363	1	1	1	Transcriptional modulator WTM1	WTM1		1	1	1	1	0	0	0	0	1	0	0	1	1	0	1	1	0	1	1	0	0	0	1	0	1	0	0	1	0	1	0	1	1	1	0	0	0	0	0	1	0	0
Q12366	Q12366	2	2	2	Non-disjunction protein 1	NDJ1		1	2	2	2	0	0	0	0	2	2	1	1	1	2	1	1	1	1	1	2	2	2	1	1	1	1	2	1	1	2	2	2	1	1	1	0	0	0	0	2	2	1
Q12393	Q12393	7	7	7	Genetic interactor of prohibitin 5, mitochondrial	GEP5		1	7	7	7	4	3	6	5	2	3	4	4	4	3	4	3	2	3	1	2	3	3	4	1	2	2	2	4	0	2	1	3	2	0	0	4	3	6	5	2	3	4
Q12398	Q12398	1	1	1	Probable transcription factor HMS1	HMS1		1	1	1	1	0	0	0	1	0	0	0	0	0	0	0	0	0	1	1	1	0	0	1	0	1	1	0	1	1	1	1	1	1	1	1	0	0	0	1	0	0	0
Q12405	Q12405	2	2	2	Peroxisomal membrane protein LPX1	LPX1		1	2	2	2	0	1	1	1	0	1	1	1	0	0	0	1	0	0	0	0	1	0	1	0	0	0	0	1	0	0	1	0	2	1	0	0	1	1	1	0	1	1
Q12406	Q12406	1	1	1	Actin-related protein 7	ARP7		1	1	1	1	0	0	0	0	0	0	0	0	0	0	0	0	0	1	0	0	0	0	0	0	0	0	0	0	0	0	0	0	0	0	0	0	0	0	0	0	0	0
Q12417	Q12417	2	2	2	Pre-mRNA-splicing factor PRP46	PRP46		1	2	2	2	0	0	0	0	0	0	0	0	0	0	0	0	0	1	0	0	0	0	0	0	0	1	0	0	0	0	0	0	0	0	0	0	0	0	0	0	0	0
Q12427	Q12427	12	12	12	Protein STB3	STB3		1	12	12	12	6	5	3	4	5	4	6	5	7	6	7	4	3	6	5	6	5	7	6	1	9	8	5	6	3	8	7	8	6	1	6	6	5	3	4	5	4	6
Q12428	Q12428	3	3	3	Probable 2-methylcitrate dehydratase	PDH1		1	3	3	3	0	0	0	0	0	0	1	0	0	1	1	0	0	1	0	0	0	1	1	0	1	1	0	0	1	1	2	1	0	0	2	0	0	0	0	0	0	1
Q12429	Q12429	3	3	3	Diphthine--ammonia ligase	DPH6		1	3	3	3	0	0	0	1	0	0	1	0	0	0	0	0	0	0	0	0	0	0	0	0	1	0	0	0	0	0	0	0	0	0	0	0	0	0	1	0	0	1
Q12433	Q12433	8	8	8	Protein AHC1	AHC1		1	8	8	8	4	5	4	4	5	4	4	4	4	4	4	4	3	4	2	5	4	4	4	4	5	5	5	4	2	4	5	5	5	3	4	4	5	4	4	5	4	4
Q12447	Q12447	5	5	5	Polyamine N-acetyltransferase 1	PAA1		1	5	5	5	2	2	2	4	1	2	2	3	1	1	0	3	1	1	4	3	2	0	3	1	1	1	2	3	2	2	3	2	1	0	0	2	2	2	4	1	2	2
Q12449	Q12449	3	3	3	Hsp90 co-chaperone AHA1	AHA1		1	3	3	3	1	0	2	0	1	0	0	2	0	0	0	3	1	1	2	1	1	0	3	1	0	0	1	3	0	1	2	0	1	0	0	1	0	2	0	1	0	0
Q12457	Q12457	9	9	9	RNA polymerase I termination factor	NSI1		1	9	9	9	3	3	3	3	2	2	2	0	2	1	0	2	4	7	3	3	2	1	3	1	1	1	3	1	0	2	2	1	1	0	0	3	3	3	3	2	2	2
Q12458	Q12458	1	1	1	Putative reductase 1	YPR1		1	1	1	1	0	0	0	0	0	0	0	0	0	0	0	0	0	1	0	0	0	0	0	0	0	0	0	0	0	0	0	0	0	0	0	0	0	0	0	0	0	0
Q12460	Q12460	6	6	6	Nucleolar protein 56	NOP56		1	6	6	6	3	3	3	4	2	2	1	2	2	1	1	4	1	3	2	2	2	0	3	2	1	2	0	3	1	2	2	2	3	0	1	3	3	3	4	2	2	1
Q12461	Q12461	2	2	2	Serine/threonine-protein phosphatase 2A activator 2	RRD2		1	2	2	2	1	0	0	0	0	0	0	0	0	1	1	0	0	0	0	0	1	0	0	0	0	0	0	0	0	0	0	0	0	0	0	1	0	0	0	0	0	0
Q12464	Q12464	1	1	1	RuvB-like protein 2	RVB2		1	1	1	1	1	0	0	1	1	1	1	1	1	1	1	1	1	1	1	0	1	1	1	1	1	0	1	1	0	1	1	1	0	0	1	1	0	0	1	1	1	1
Q12480	Q12480	1	1	1	Probable electron transfer flavoprotein subunit alpha, mitochondrial	AIM45		1	1	1	1	0	0	0	0	0	0	0	0	0	0	0	0	0	1	0	0	0	0	0	0	0	0	0	0	0	0	0	0	0	0	0	0	0	0	0	0	0	0
Q12488	Q12488	1	1	1	DNA replication complex GINS protein PSF1	PSF1		1	1	1	1	0	0	0	0	0	0	0	0	0	0	0	0	0	1	0	0	0	0	0	0	0	0	0	0	0	0	0	0	0	0	0	0	0	0	0	0	0	0
Q12493	Q12493	1	1	1	Central kinetochore subunit NKP1	NKP1		1	1	1	1	1	1	1	1	0	0	0	0	0	0	0	0	0	0	0	0	0	0	0	0	0	0	0	0	0	0	0	0	0	0	0	1	1	1	1	0	0	0
Q12494	Q12494	6	6	6	Inositol hexakisphosphate kinase 1	KCS1		1	6	6	6	2	2	2	0	1	1	2	2	1	1	1	2	2	1	0	2	2	1	2	1	2	2	2	3	1	2	2	2	2	1	1	2	2	2	0	1	1	2
Q12499	Q12499	3	3	3	Nucleolar protein 58	NOP58		1	3	3	3	1	1	1	1	0	0	0	0	0	0	0	0	0	2	1	0	0	0	0	0	0	0	0	0	0	0	0	0	0	0	0	1	1	1	1	0	0	0
Q12510	Q12510	6	6	6	DNA damage-binding protein CMR1	CMR1		1	6	6	6	3	3	3	4	4	5	4	4	5	4	5	4	2	4	4	4	4	5	5	3	5	3	4	5	3	5	4	4	4	0	2	3	3	3	4	4	5	4
Q12512	Q12512	1	1	1	Protein ZPS1	ZPS1		1	1	1	1	0	0	0	0	0	0	0	1	0	0	0	0	0	0	0	0	0	0	0	0	0	0	0	1	0	0	0	0	0	0	0	0	0	0	0	0	0	0
Q12513	Q12513	2	2	2	Translation machinery-associated protein 17	TMA17		1	2	2	2	1	2	1	1	1	1	1	1	1	1	1	2	0	0	1	1	1	1	2	0	1	1	2	1	0	1	1	1	2	0	0	1	2	1	1	1	1	1
Q12672	Q12672	18	1	1	60S ribosomal protein L21-B	RPL21B		1	18	1	1	9	7	8	9	11	10	12	11	10	9	10	8	7	13	11	12	8	12	8	9	11	9	9	9	9	8	10	7	7	1	8	1	1	1	1	1	1	1
Q12680	Q12680	3	3	3	Glutamate synthase [NADH]	GLT1		1	3	3	3	0	0	0	1	0	0	0	1	0	0	0	1	1	1	0	0	0	0	1	0	0	0	0	1	0	0	0	0	0	0	0	0	0	0	1	0	0	0
Q12692	Q12692	3	3	3	Histone H2A.Z	HTZ1		1	3	3	3	1	0	1	1	1	1	1	1	1	1	1	1	1	2	2	1	1	1	1	1	1	1	1	1	1	1	1	1	1	1	1	1	0	1	1	1	1	1
Q12749	Q12749	5	5	5	Structural maintenance of chromosomes protein 6	SMC6		1	5	5	5	0	0	0	0	1	2	0	2	0	1	0	2	2	2	1	4	0	1	2	2	2	3	4	3	1	4	3	3	2	0	2	0	0	0	0	1	2	0
Q3E705	Q3E705	1	1	1	rRNA-processing protein EFG1	EFG1		1	1	1	1	0	0	0	0	0	0	0	0	0	0	0	0	1	0	0	0	0	0	0	0	0	0	0	0	0	0	0	0	0	0	0	0	0	0	0	0	0	0
Q3E757;P0C0W9	Q3E757;P0C0W9	9;8	9;8	9;8	60S ribosomal protein L11-B;60S ribosomal protein L11-A	RPL11B;RPL11A	;	2	9	9	9	5	4	4	4	5	5	6	4	5	5	5	0	4	4	4	5	4	5	4	4	5	5	4	4	5	4	5	5	5	0	5	5	4	4	4	5	5	6
Q3E764	Q3E764	3	3	3	Translation machinery-associated protein 7	TMA7		1	3	3	3	0	0	2	1	0	0	0	2	0	0	0	1	0	0	2	0	0	0	2	0	0	0	0	1	0	0	0	0	0	0	0	0	0	2	1	0	0	0
Q3E792	Q3E792	9	9	1	40S ribosomal protein S25-A	RPS25A		1	9	9	1	5	5	4	6	6	6	5	5	6	5	5	4	5	6	6	5	4	7	6	4	6	2	6	4	7	4	6	3	5	1	3	5	5	4	6	6	6	5
Q3E7X9	Q3E7X9	2	1	1	40S ribosomal protein S28-A	RPS28A		1	2	1	1	1	1	1	1	1	1	1	1	1	1	1	1	1	1	2	1	1	1	1	1	1	1	1	1	1	1	1	1	1	0	1	1	1	1	1	1	1	1
Q3E7Y3;P0C0W1	Q3E7Y3;P0C0W1	10;9	10;9	10;9	40S ribosomal protein S22-B;40S ribosomal protein S22-A	RPS22B;RPS22A	;	2	10	10	10	1	0	1	0	1	0	5	0	2	3	6	1	1	7	2	1	1	3	1	1	4	3	1	1	3	1	3	4	0	0	2	1	0	1	0	1	0	5
Q3E7Y6	Q3E7Y6	1	1	1	N-terminal-borealin-like protein	NBL1		1	1	1	1	1	1	1	1	0	0	0	1	0	0	0	0	0	0	1	0	0	0	0	0	0	0	0	0	0	0	0	0	0	0	0	1	1	1	1	0	0	0
Q3E833	Q3E833	1	1	1	EKC/KEOPS complex subunit PCC1	PCC1		1	1	1	1	0	0	1	1	1	0	0	1	1	0	0	1	0	0	0	1	0	0	1	0	0	1	1	1	0	0	0	1	1	0	0	0	0	1	1	1	0	0
Q3E835	Q3E835	1	1	1	MHF histone-fold complex subunit 1	MHF1		1	1	1	1	0	0	0	0	0	0	0	1	1	0	0	1	0	0	0	0	0	0	1	0	0	0	1	0	0	1	0	0	1	0	0	0	0	0	0	0	0	0
Q3E841	Q3E841	3	3	3	Uncharacterized protein YNR034W-A	YNR034W-A		1	3	3	3	0	0	1	1	0	0	0	2	0	0	0	1	0	2	1	0	0	0	2	0	0	0	0	0	0	0	0	0	0	0	0	0	0	1	1	0	0	0
Q92317	Q92317	1	1	1	Negative cofactor 2 complex subunit beta	NCB2		1	1	1	1	1	1	1	1	1	1	1	1	1	1	1	1	0	0	1	1	1	1	1	0	1	1	1	1	0	1	1	1	1	0	0	1	1	1	1	1	1	1
Q99190	Q99190	3	3	3	Very-long-chain enoyl-CoA reductase	TSC13		1	3	3	3	0	0	0	1	0	1	0	2	1	1	0	0	1	2	0	1	0	0	1	0	1	1	1	0	0	1	0	0	1	0	0	0	0	0	1	0	1	0
Q99216	Q99216	1	1	1	Pre-rRNA-processing protein PNO1	PNO1		1	1	1	1	0	0	0	1	0	0	0	0	0	0	0	0	0	0	1	0	0	0	1	0	0	0	0	0	0	0	0	0	1	0	0	0	0	0	1	0	0	0
Q99247	Q99247	10	10	10	Uncharacterized WD repeat-containing protein YOL087C			1	10	10	10	3	5	7	6	1	3	3	2	2	3	0	4	2	7	3	4	4	1	3	2	1	3	3	6	1	4	5	3	4	0	3	3	5	7	6	1	3	3
Q99288	Q99288	1	1	1	Broad-range acid phosphatase DET1	DET1		1	1	1	1	1	1	1	0	0	1	1	0	0	0	0	0	0	0	0	0	0	1	0	0	0	0	0	0	0	0	0	1	0	0	0	1	1	1	0	0	1	1
Q99383	Q99383	2	2	2	Nuclear polyadenylated RNA-binding protein 4	HRP1		1	2	2	2	0	0	0	0	0	0	0	2	0	0	0	1	0	2	0	0	0	0	2	0	0	0	0	0	0	0	0	0	0	0	0	0	0	0	0	0	0	0
Q9P305	Q9P305	1	1	1	mRNA stability protein IGO2	IGO2		1	1	1	1	0	0	0	0	0	0	0	0	0	0	0	0	0	0	0	0	0	0	1	0	0	0	0	0	0	0	0	0	0	0	0	0	0	0	0	0	0	0
REV__P02992	REV__P02992	1	1	1				1	1	1	1	1	0	0	0	1	1	1	0	1	1	1	0	0	1	0	1	1	1	0	1	1	1	1	0	1	1	1	1	0	0	0	1	0	0	0	1	1	1
REV__P20459	REV__P20459	1	1	1				1	1	1	1	0	0	0	0	0	0	0	0	0	0	0	0	0	0	0	0	0	1	0	0	1	0	1	0	0	1	0	1	0	0	0	0	0	0	0	0	0	0
REV__P32377	REV__P32377	1	1	1				1	1	1	1	0	0	0	0	0	0	0	0	1	0	0	0	0	0	0	0	0	0	0	0	0	0	0	0	0	0	0	0	0	0	0	0	0	0	0	0	0	0
REV__P32389	REV__P32389	1	1	1				1	1	1	1	0	0	0	0	1	1	1	1	1	1	1	1	1	0	0	1	1	1	1	1	1	1	1	1	0	1	1	1	0	0	1	0	0	0	0	1	1	1
REV__P32493	REV__P32493	1	1	1				1	1	1	1	0	1	1	1	1	1	0	0	1	1	1	0	0	0	1	1	1	1	1	0	0	1	1	0	0	0	1	1	1	0	1	0	1	1	1	1	1	0
REV__P32568	REV__P32568	1	1	1				1	1	1	1	0	0	0	0	1	0	0	0	1	1	1	0	0	0	1	0	1	0	1	0	1	1	0	0	0	0	0	0	0	0	0	0	0	0	0	1	0	0
REV__P32603	REV__P32603	1	1	1				1	1	1	1	0	1	0	0	0	0	1	0	0	0	0	0	0	0	0	1	1	0	0	0	0	0	0	0	0	0	0	0	0	0	0	0	1	0	0	0	0	1
REV__P32892	REV__P32892	1	1	1				1	1	1	1	1	1	1	1	1	1	1	1	1	1	1	1	0	0	1	1	1	1	1	0	1	1	1	1	0	1	1	1	1	0	0	1	1	1	1	1	1	1
REV__P34230	REV__P34230	1	1	1				1	1	1	1	0	1	0	1	1	1	0	1	0	1	0	1	0	0	0	0	0	1	1	0	1	1	0	0	0	1	0	1	0	0	1	0	1	0	1	1	1	0
REV__P34756	REV__P34756	1	1	1				1	1	1	1	0	0	0	0	0	0	0	0	0	0	0	0	0	1	0	0	0	0	0	0	0	0	0	0	0	0	0	0	0	0	0	0	0	0	0	0	0	0
REV__P37267	REV__P37267	1	1	1				1	1	1	1	1	0	1	1	1	0	1	0	1	1	1	1	1	0	0	0	1	1	1	1	0	1	0	1	0	0	1	1	0	0	0	1	0	1	1	1	0	1
REV__P38321	REV__P38321	1	1	1				1	1	1	1	1	1	1	0	1	1	0	0	1	0	0	0	0	0	0	1	0	0	0	0	1	1	1	0	0	1	1	1	0	0	0	1	1	1	0	1	1	0
REV__P39967	REV__P39967	1	1	1				1	1	1	1	0	0	0	0	0	0	0	0	0	0	0	0	0	1	0	0	0	0	0	0	0	0	0	0	0	0	0	0	0	0	0	0	0	0	0	0	0	0
REV__P47159	REV__P47159	1	1	1				1	1	1	1	0	0	0	1	0	0	0	0	0	0	0	0	0	0	0	0	0	0	1	0	0	0	0	1	0	0	0	0	0	0	0	0	0	0	1	0	0	0
REV__P50875	REV__P50875	1	1	1				1	1	1	1	0	0	0	0	0	0	0	1	0	0	0	0	0	0	0	0	0	0	1	0	0	0	0	0	0	0	0	0	0	0	0	0	0	0	0	0	0	0
REV__P51534	REV__P51534	2	2	2				1	2	2	2	0	0	0	1	0	0	0	1	0	0	0	1	0	0	1	0	0	0	0	0	0	0	0	1	0	0	0	0	0	0	0	0	0	0	1	0	0	0
REV__P53598	REV__P53598	1	1	1				1	1	1	1	1	0	0	1	1	0	1	1	1	1	0	1	0	0	0	1	0	1	1	1	0	1	1	1	0	1	0	0	1	0	1	1	0	0	1	1	0	1
REV__Q02785	REV__Q02785	1	1	1				1	1	1	1	0	0	0	0	0	0	0	0	0	0	0	0	0	0	0	1	1	1	1	0	1	1	1	0	0	1	1	1	0	0	0	0	0	0	0	0	0	0
REV__Q03263	REV__Q03263	1	1	1				1	1	1	1	0	0	0	0	1	1	1	0	1	1	1	0	1	0	0	1	1	1	1	1	1	1	1	0	1	1	1	1	0	0	0	0	0	0	0	1	1	1
REV__Q04052	REV__Q04052	1	1	1				1	1	1	1	0	0	0	0	0	0	0	0	1	1	0	0	0	0	0	1	0	0	0	0	0	0	0	0	0	0	0	0	0	0	1	0	0	0	0	0	0	0
REV__Q04600	REV__Q04600	1	1	1				1	1	1	1	0	0	0	0	0	0	0	1	0	0	0	0	1	0	1	0	0	0	1	1	0	0	0	1	1	0	0	0	0	0	0	0	0	0	0	0	0	0
REV__Q08984	REV__Q08984	1	1	1				1	1	1	1	0	0	0	0	0	0	1	0	0	0	1	0	0	0	1	0	0	0	0	0	0	0	0	0	0	0	0	0	0	0	0	0	0	0	0	0	0	1
REV__Q12051	REV__Q12051	1	1	1				1	1	1	1	0	0	0	1	0	0	0	0	0	0	0	0	0	0	0	0	0	0	1	0	0	0	0	1	0	0	0	0	0	0	0	0	0	0	1	0	0	0
REV__Q12083	REV__Q12083	1	1	1				1	1	1	1	0	1	0	0	0	0	0	0	0	0	0	0	0	0	0	0	0	0	0	0	0	0	0	1	0	0	1	0	1	0	0	0	1	0	0	0	0	0
REV__Q12089	REV__Q12089	3	3	3				1	3	3	3	0	0	1	1	0	1	0	1	0	1	1	0	0	1	0	0	1	0	0	0	1	0	0	1	0	0	0	0	2	0	0	0	0	1	1	0	1	0
REV__Q12150	REV__Q12150	2	2	2				1	2	2	2	1	0	1	0	1	1	0	2	1	1	1	1	0	0	1	1	1	1	2	1	1	0	1	1	1	1	1	1	0	0	1	1	0	1	0	1	1	0
REV__Q12306	REV__Q12306	2	1	1				1	2	1	1	2	2	1	1	2	1	2	2	2	1	2	1	0	0	1	1	2	1	2	0	1	1	2	2	0	2	1	2	1	0	0	1	1	0	0	1	0	1
[truncated: 236 more columns]

## Sheet: SUMO targets
LFQ intensity 0_1	LFQ intensity 0_2	LFQ intensity 0_3	LFQ intensity 0_4	LFQ intensity 1_1	LFQ intensity 1_2	LFQ intensity 1_3	LFQ intensity 1_4	LFQ intensity 2_1	LFQ intensity 2_2	LFQ intensity 2_3	LFQ intensity 2_4	LFQ intensity 2_5	LFQ intensity 2_6	LFQ intensity 2_7	LFQ intensity 3_1	LFQ intensity 3_2	LFQ intensity 3_3	LFQ intensity 3_4	LFQ intensity 3_5	LFQ intensity 5_1	LFQ intensity 5_2	LFQ intensity 5_3	LFQ intensity 5_4	LFQ intensity 5_5	LFQ intensity 6_1	LFQ intensity 6_2	LFQ intensity 6_3	LFQ intensity 6_4	LFQ intensity 6_5	LFQ intensity 6_6	C: Only identified by site	C: Reverse	C: Potential contaminant	C: GlyGly (K) site IDs	C: Oxidation (M) site IDs	C: Phospho (STY) site IDs	N: Peptides	N: Razor + unique peptides	N: Unique peptides	N: Sequence coverage [%]	N: Unique + razor sequence coverage [%]	N: Unique sequence coverage [%]	N: Mol. weight [kDa]	N: Q-value	N: Score	N: Intensity	N: MS/MS count	N: Sequence length	T: Protein IDs
58294000	24921000	70179000	11666000	29408000	25882000	34937000	24587000	45341000	22400000	39917000	14681000	27379000	31171000	68191000	42641000	19585000	33865000	73174000	31593000	55360000	34796000	22393000	19504000	14288000	57882000	28274000	53168000	15515000	14766000	43973000				1;2;3;4			7	7	7	12.2	12.2	12.2	61.849	0	130.14	2847100000	812	549	O13297
10397000	18580000	17744000	6723900	14220000	15262000	7063900	8415800	15027000	11949000	8959100	9214000	19848000	9584000	19854000	8838600	11495000	6196700	6312800	6235100	3860000	9884900	7133600	1678200	0	7744700	7656000	5009200	0	0	0				10;11;12;5;6;7;8;9	3;4	2	8	8	8	17.8	17.8	17.8	65.318	0	57.823	804480000	437	566	O13329
5469900	16049000	0	18857000	3232000	0	3205300	3056100	3188600	3056200	1608500	6716200	0	0	3793400	3987900	0	0	15205000	3545500	1734900	3170000	0	4582600	0	0	4061100	2251000	2541500	0	2092200				13;14;15			6	6	6	52.3	52.3	52.3	22.443	0	6.7795	477680000	88	197	O13516;P05755
1637600	0	1691600	816290	0	0	0	1205600	875760	0	0	1037000	0	2136300	10252000	0	0	0	1334400	0	0	0	0	0	0	818570	0	0	0	0	0				16;17;18;19	5		5	5	5	40	40	40	11.135	0	24.428	80650000	23	100	O14455;P05745
1535400	2182500	3223800	1695900	2371800	2575500	2152300	891650	3037200	2554900	1762700	2751100	2374500	0	1444300	5889100	5116400	2986200	5050200	2786000	4815800	4789200	9162000	7921500	2817900	9260800	8959600	9906300	4236900	0	3461500				20;21;22;23;24;25;26			8	8	8	38.4	38.4	38.4	16.403	0	14.644	282750000	108	151	O14467
0	0	0	0	0	0	0	0	0	0	0	0	0	1859600	0	0	0	0	0	0	0	0	0	0	0	0	0	0	0	0	0				27;28;29			4	4	4	38.8	38.8	38.8	9.4044	0	6.9056	46397000	12	85	O43137
0	0	0	0	0	0	0	0	0	0	0	0	0	0	1366700	0	0	0	2057200	0	0	0	0	0	0	0	0	0	0	0	0				30;31;32			2	2	2	31.5	31.5	31.5	10.386	0	23.02	16305000	13	89	O94742
3332400	0	6606200	1335600	0	0	5477400	1466300	0	0	0	1597200	0	0	5260200	0	0	0	1904500	0	0	0	0	0	0	0	0	0	0	0	0				33;34;35;36	6		6	6	6	51.4	51.4	51.4	12.182	0	7.4995	121340000	29	109	P00044
42879000	34984000	43832000	82097000	147730000	173840000	281090000	161980000	138120000	166530000	192880000	76566000	78173000	116140000	87124000	81168000	136000000	144980000	106330000	178330000	81990000	131070000	85252000	64426000	298720000	53313000	80632000	96556000	100050000	72972000	134680000				37;38;39;40;41;42;43;44;45;46;47;48	10;11;12;8;9		41	41	24	77.6	77.6	54.3	36.849	0	323.31	10308000000	3865	348	P00330
8720300	5270700	10652000	2974700	8542000	12256000	20682000	5663000	7843400	11599000	13839000	4579000	3895100	4149300	5396200	5877000	12042000	8981100	8808100	10550000	3282900	15398000	7321500	3289600	16336000	5615700	8376000	6579200	6131100	10432000	0				37;44;45;49;50;51;52;53;54;55	10;13;14	3	31	17	16	73.6	50.6	46.8	36.731	0	59.583	708080000	410	348	P00331
0	0	0	0	0	0	0	0	0	0	0	0	0	14473000	0	0	0	0	0	0	0	0	0	0	0	0	0	0	0	0	0				56;57;58;59;60;61;62;63;64;65;66;67;68;69	15		29	3	0	65.4	9.6	0	35.846	0	4.6002	60598000	9	332	P00358
157880000	123290000	155400000	102100000	124230000	114440000	101300000	106710000	146320000	125570000	132840000	138810000	137670000	67603000	169510000	218270000	144880000	143610000	111100000	117950000	139930000	202340000	196890000	158680000	158190000	187960000	147100000	153210000	131950000	209960000	114500000				56;57;58;60;61;62;63;66;67;68;69;70;71;72;73	15;16		34	34	8	84.9	84.9	33.4	35.746	0	323.31	11357000000	2522	332	P00359
0	0	0	0	0	0	0	0	0	0	0	0	0	0	0	0	0	0	586840	0	0	0	0	0	0	0	0	0	0	0	0	+			56;57;58;59;64;65	15		13	1	1	40.4	5.1	5.1	35.75	1	-2	5483200	1	332	P00360
29377000	43679000	39348000	25239000	67993000	81609000	92582000	23480000	65901000	94464000	84927000	18209000	27863000	10680000	16235000	58336000	116690000	67375000	18761000	73104000	66082000	107970000	56184000	28185000	117110000	68969000	79414000	63772000	29955000	28525000	75434000				74;75	17		8	8	8	49.4	49.4	49.4	15.854	0	235.19	5367600000	1509	154	P00445
0	0	0	2524700	5431400	4113500	7506100	1429900	4785000	5606200	7826700	3950600	0	0	2126200	1510400	2476300	4718200	2921200	0	7040400	3081500	2312400	2070700	0	1342100	2816200	3836000	2982000	0	0				76			4	4	4	23.2	23.2	23.2	25.774	0	98.991	213320000	240	233	P00447
8256600	5940900	4316300	10807000	29384000	29639000	56559000	16016000	33760000	31216000	53565000	3139200	7039400	43270000	10035000	7735600	13549000	32538000	9126800	14451000	19861000	33948000	7498400	4237100	51849000	2739500	13203000	16424000	0	0	48163000				77;78			12	12	12	34.4	34.4	34.4	54.544	0	191.86	1624000000	646	500	P00549
36387000	26521000	32805000	38994000	37118000	30132000	54857000	54048000	57298000	47319000	76100000	39473000	23378000	55875000	42813000	9763500	29042000	61171000	87270000	28878000	53084000	40183000	20675000	29368000	201760000	11761000	20605000	46688000	25173000	0	128360000				79;80;81;82;83;84;85;86;87;88;89;90;91;92;93;94;95	18		38	38	38	82.9	82.9	82.9	44.738	0	323.31	4015100000	1817	416	P00560
0	0	0	0	0	0	4477000	0	2748000	0	8117700	0	0	6062200	0	0	5065300	7506100	0	0	10927000	6481100	2950700	0	0	0	3820900	6935100	0	0	0				96;97			7	7	7	28.2	28.2	28.2	35.662	0	125.53	195370000	99	333	P00812
0	0	0	0	0	0	0	0	0	0	0	0	0	0	13860000	0	0	0	0	0	0	0	0	0	0	0	0	0	0	0	0	+			98			1	1	1	1.1	1.1	1.1	87.72	1	-2	307640000	13	799	P00815
1552300	2571600	5509400	1563200	14632000	6573000	15420000	9878400	13413000	11476000	11996000	5450900	6692300	9965700	5242800	1541200	3908400	8347400	4271000	2762400	20591000	2886200	3660300	4666000	19646000	3647000	3985700	5868400	3390200	0	8919200				100;101;102;103;99			17	17	17	76	76	76	32.299	0	109.04	523350000	329	287	P00817
2045300	1829900	2910500	0	1444700	0	0	0	1926800	868090	1460300	0	0	0	0	1179900	1500400	0	0	0	0	0	1852300	0	0	0	0	0	0	0	0				104;105;106;107;108			10	10	10	21.5	21.5	21.5	53.359	0	65.177	89493000	83	479	P00890;P08679
6969000	0	8910100	0	9070300	4248600	12437000	9825200	8015200	10733000	15734000	10400000	5833100	2878500	0	0	0	11085000	9215000	0	0	7707000	0	5388100	16559000	0	0	4786500	0	0	0				109;110;111;112;113;114	19		21	6	6	62.5	16.5	16.5	46.816	0	139.96	424430000	184	437	P00924
0	6178300	6095800	6087000	7717300	4397800	14134000	5088100	14088000	10259000	21794000	7094200	0	18830000	6252200	0	3320600	10946000	11813000	2089200	8334500	7871300	4704100	4642200	12377000	1493700	3988700	8373100	3919400	0	7758800				109;110;113;115;116;117;118;119	19;20;21		29	29	14	80.3	80.3	37.5	46.914	0	323.31	561980000	360	437	P00925
0	0	0	0	5244200	3594400	14746000	4149600	10598000	9384100	18670000	0	0	9982200	7083700	0	6833100	13318000	0	9369000	14503000	16624000	6877000	0	43307000	3104400	4701900	13514000	0	0	20139000				120;121			14	14	14	82.7	82.7	82.7	26.795	0	289.62	539820000	311	248	P00942
14370000	10291000	18007000	7308600	12329000	8252500	12567000	11548000	14299000	6986400	22939000	13234000	10742000	7858100	13481000	8925400	7626000	23842000	27739000	0	10778000	11449000	12320000	7190700	15147000	7088200	8813800	11896000	5621900	0	0				122;123;124;125;126;127			9	9	9	45.7	45.7	45.7	27.608	0	227.72	1129200000	386	247	P00950
0	0	0	0	0	0	0	0	0	0	0	0	0	0	2041600	0	0	0	1782400	0	0	0	0	0	0	0	0	0	0	0	0				128;129;130;131			3	3	3	50	50	50	7.7074	0	8.2736	31436000	44	68	P01094
0	0	3152800	807840	1116400	1418600	1435900	1909200	1650600	1696000	0	980890	1105800	0	0	1254000	0	0	0	0	0	0	1746900	731590	0	0	1273400	1300000	926620	0	0				132			2	2	2	22.4	22.4	22.4	9.87	0.0079576	1.5415	84563000	10	85	P01097
0	0	0	0	0	0	0	0	0	0	0	0	0	0	1795200	0	0	0	0	0	0	0	0	0	0	0	0	0	0	0	0				133			1	1	1	14	14	14	10.062	0	3.2072	16077000	5	86	P01098
0	0	0	0	0	0	0	0	0	0	0	0	0	652440	0	0	0	0	0	0	0	0	0	0	0	0	0	0	0	0	0				134;135;136;137;138;139;140;141;142;143;144;145		185;4	15	2	2	74.8	13.7	13.7	14.252	0	6.0902	203960000	61	131	P02293
105810000	146040000	166200000	100530000	361620000	443680000	474180000	449500000	606420000	612320000	685880000	630550000	329570000	409420000	801770000	1099000000	738190000	861980000	583220000	485080000	543250000	990320000	1081300000	449220000	367950000	1290000000	1087400000	1140500000	380790000	504780000	500750000				134;135;138;139;140;141;144;146;147;148;149		185;4	15	15	2	74.8	74.8	17.6	14.237	0	323.31	43020000000	4439	131	P02294
23006000	34050000	26161000	118690000	43060000	52016000	46489000	82040000	42234000	59062000	54243000	121280000	163460000	119980000	16298000	24231000	63581000	40375000	78253000	44960000	45430000	26497000	47821000	128150000	53265000	29453000	49829000	68226000	221130000	150870000	84229000				150;151;152;153;154			6	6	6	67	67	67	11.368	0	193.78	5929900000	1272	103	P02309
0	0	0	0	0	0	0	0	0	0	0	0	0	5762500	0	0	0	0	0	0	0	0	0	0	0	0	0	0	0	0	0	+			155;156	22		1	1	1	3.5	3.5	3.5	47.123	1	-2	12574000	1	398	P02381
4049400000	4146000000	4654500000	3640500000	3591200000	4057500000	6159800000	3163900000	2972400000	3847800000	4592000000	2239900000	1512400000	7050300000	2606100000	2617800000	3972900000	5110000000	1833500000	3235100000	3522000000	6141400000	3917300000	1794100000	6113800000	2892500000	3330000000	5307000000	2213700000	1989500000	4918800000				157;158;159;160;161;162;163;164;165	23;24;25		26	26	26	85.9	85.9	85.9	16.721	0	323.31	379390000000	23951	149	P02406
33245000	49625000	34189000	37070000	33299000	33299000	25722000	32612000	22344000	25154000	24439000	39355000	36584000	16421000	3786900	5074200	15454000	32366000	45291000	7168500	21556000	4064900	11389000	25274000	17137000	8679400	17795000	13123000	38848000	23957000	17979000				166;167;168;169;170;171;172;173;174			14	14	14	72.1	72.1	72.1	15.803	0	157.83	2159700000	822	136	P14127;P02407
0	0	0	0	0	0	9547900	0	0	0	0	0	0	0	0	0	0	0	0	0	0	4383000	0	0	0	0	0	0	0	0	2234000				175;176			5	5	5	26.7	26.7	26.7	50.922	0	208.07	132160000	40	457	P02557
1503700	2421900	1801300	5341300	1295800	0	0	3933900	1453600	0	0	0	0	2027800	0	1849600	0	2771700	2462700	0	8287200	4170600	2738100	10226000	4479800	29068000	9878100	25574000	8720200	0	0				177;178;179;180;181;182;183;184;185;186			13	4	4	20.3	4.9	4.9	81.405	0	27.333	320810000	82	709	P02829
126340000	103090000	126220000	70467000	76686000	82923000	57940000	65058000	92392000	68085000	49837000	114540000	119460000	140750000	87074000	107000000	92119000	78121000	130710000	82793000	71346000	106890000	114790000	111020000	44649000	147270000	102320000	94013000	103550000	122500000	90893000				187;188;189;190;191;192;193;194;195;196;197;198	27;28;29;30		37	37	37	75.8	75.8	75.8	50.032	0	323.31	8345200000	2587	458	P02994
9619600	11496000	15682000	9466800	4473400	4836000	0	0	0	0	0	0	0	0	5086300	0	0	0	2224400	0	0	0	0	0	0	0	0	0	0	0	0				199;200			3	3	3	12.1	12.1	12.1	31.31	0	18.865	226510000	142	281	P03069
38255000	53585000	35600000	42556000	31334000	34930000	20955000	50480000	46331000	46715000	30917000	49684000	106390000	148370000	149590000	20550000	24579000	26475000	32424000	9528200	14094000	17357000	27020000	25466000	7400800	16477000	41489000	24781000	67358000	0	15730000				201;202	31		9	9	9	20.1	20.1	20.1	48.619	0	323.31	3866800000	919	423	P03870
0	0	0	0	0	0	0	0	0	0	0	0	0	7941100	0	0	0	0	0	0	0	0	0	0	0	0	0	0	0	0	0				203;204			4	4	4	14.7	14.7	14.7	43.231	0	8.5427	23765000	12	373	P03871
17669000	11416000	22832000	8152700	14234000	13694000	11633000	7731700	12153000	11585000	13298000	8920200	17968000	43313000	58497000	22294000	13189000	11156000	19169000	28830000	11650000	8983700	23209000	6121400	4620200	22612000	30538000	19887000	7760400	0	18362000				205;206;207;208;209;210;211;212;213;214;215;216	32;33		13	13	13	47	47	47	33.196	0	181.59	1518700000	597	296	P03872
0	0	0	0	0	0	0	0	0	0	0	0	0	4761600	0	0	0	0	0	0	0	0	0	0	0	0	0	0	0	0	0				217			8	8	8	48.7	48.7	48.7	29.239	0	11.44	39401000	20	267	P03962
2780900	0	3149800	4143400	14294000	9844200	23753000	3649900	0	6307800	6207300	6785700	7229200	1128400	671860	4499200	3214900	0	2134400	3183400	3578500	1178600	9014400	2149400	7388500	0	0	0	3021300	0	0				218;219;220			14	14	14	76.8	76.8	76.8	17.142	0	132.84	377040000	135	155	P04037
0	0	0	0	0	0	0	0	0	0	0	0	0	8937500	0	0	0	0	0	0	0	0	0	0	0	0	0	0	0	0	0				221			2	2	2	7.3	7.3	7.3	56.719	0	5.2507	37570000	4	510	P04046
0	0	0	0	0	0	0	0	0	0	0	0	0	0	3548100	0	0	0	0	0	0	0	0	0	0	0	0	0	0	0	0				222			1	1	1	0.8	0.8	0.8	191.61	0	2.7483	37693000	13	1733	P04050
0	0	0	0	0	0	0	0	0	0	0	0	0	0	3291000	0	0	0	0	0	0	0	0	0	0	0	0	0	0	0	0				223;224			1	1	1	2.2	2.2	2.2	51.989	0	2.8608	50843000	19	463	P04076
0	0	0	0	0	0	0	0	0	0	0	0	0	3246500	0	0	0	0	0	0	0	0	0	0	0	0	0	0	0	0	0				225			2	2	2	5	5	5	64.343	0.0056818	2.0014	20029000	6	577	P04147
0	0	0	0	0	0	0	0	0	0	0	0	0	12686000	0	20409000	0	0	0	0	0	0	0	0	0	8985200	10966000	11559000	0	0	0				226;227	34;35	5;6;7	5	5	5	8.2	8.2	8.2	99.402	0	290.57	189900000	78	881	P04386
9893300	9077700	11063000	7132300	7731800	8226900	7588100	9250800	11504000	6451500	7076500	7492600	7585700	11278000	25226000	11346000	8407100	9742300	15606000	1859500	9379600	10700000	9297700	9134800	13474000	13054000	8554700	5486800	5346700	12197000	7093500				228;229;230;231;232;233;234;235;236;237	36		14	14	4	76.1	76.1	22.6	17.613	0	65.071	811390000	418	155	P04449
41189000	51250000	40546000	39462000	48092000	44977000	38564000	20862000	36525000	43407000	38600000	25857000	21342000	30284000	17671000	17750000	33201000	29662000	35412000	30729000	32163000	23510000	23638000	26601000	45072000	15355000	23499000	19834000	25469000	26343000	51082000				238;239;240;241;242;243;244;245;246;247;248;249	37;38		12	12	12	65.5	65.5	65.5	15.757	0	135.44	2738900000	1335	142	P04456
18102000	11816000	12968000	9812200	5864900	5005000	3019500	2786300	7109700	5508700	0	0	23998000	19414000	13406000	2770800	3687400	0	1350900	5056500	0	2837200	5795600	0	0	4368200	3070000	0	0	0	0				250;251;252;253;254;255;256;257	39		9	9	9	11.8	11.8	11.8	89.994	0	51.521	474120000	95	769	P04786
1839600	0	2232400	2055900	0	0	3676000	1033300	3502600	3321300	5592200	2188800	1474600	0	2269600	0	1511100	5592000	10834000	0	3203100	3585800	0	1879000	0	0	0	2731600	1598300	0	0				258;259;260;261			7	7	7	20.8	20.8	20.8	53.738	0	42.454	199920000	92	485	P04806;P04807
16170000	33550000	30193000	16135000	91495000	103270000	88416000	232830000	119530000	113030000	155320000	398300000	50988000	67922000	258510000	210980000	183940000	182470000	258000000	100000000	145310000	251270000	211820000	217520000	56153000	237920000	190750000	357610000	228710000	0	100330000				262;263;264;265;266;267;268;269		186;8	7	7	2	60.6	60.6	8.3	13.989	0	192.39	12397000000	1115	132	P04911
48213000	73143000	72734000	0	125860000	137550000	117960000	39703000	205120000	259470000	211310000	51308000	67363000	0	10221000	275810000	253160000	257340000	30540000	154550000	180840000	351170000	334670000	0	25932000	303560000	301930000	373810000	19100000	0	166340000				262;263;265;266;267;268;270;271		9	7	2	2	60.6	8.3	8.3	13.989	0	120.17	9799100000	313	132	P04912
0	0	0	0	0	0	0	0	0	0	0	0	0	811220	0	0	0	0	0	0	0	0	0	0	0	0	0	0	0	0	0				272			1	1	1	19.8	19.8	19.8	10.746	0	8.4652	28213000	14	106	P05319
2844800	2088000	3440800	3990800	2322700	2082200	2229400	3432500	1224200	3863300	2482000	2869700	0	3990600	6196100	2974600	1797000	3410500	9340800	2624000	4343400	3366500	1942700	2810700	8530200	3541800	2157200	5085100	3048700	0	2928000				273;274;275;276;277;278;279;280;281;282;283;284			14	14	2	66.8	66.8	8.6	27.638	0	24.784	282040000	282	244	P05737
13420000	8691100	15375000	4907200	12565000	8337700	13498000	10581000	15514000	15520000	24944000	10587000	6147000	23596000	20052000	13029000	13227000	18482000	24835000	10430000	15400000	17319000	9253200	7373700	62082000	19724000	13432000	13561000	6857100	0	30103000				285;286;287;288;289;290;291;292;293;294;295	42		18	18	3	69.1	69.1	13.6	21.569	0	151.77	1217500000	526	191	P05738
0	0	0	0	0	0	0	0	0	0	0	0	0	0	1845800	0	0	0	0	0	0	0	0	0	0	0	0	0	0	0	0				296			2	1	1	11.9	6.2	6.2	19.986	0	3.3834	55254000	11	176	P05739
0	2219600	0	2061800	0	3375500	0	3318600	2625700	0	4260900	0	0	6320000	4279600	0	0	2547600	2542000	0	0	2596400	0	2516100	0	3747800	0	0	2148400	0	0				297;298;299;300;301;302			7	7	7	47.3	47.3	47.3	20.551	0	20.126	167160000	50	184	P46990;P05740
5734300	6657400	7581400	8510500	11348000	8249500	8013200	5137500	7119800	7638400	8077900	5160500	0	0	14656000	0	3378900	14486000	4332800	0	13000000	25366000	0	4076000	11336000	4683600	3834300	0	3026100	0	0				303;304;305;306			7	7	1	71	71	25.2	12.154	0	109.55	546220000	179	107	P05744
10389000	33026000	18408000	7968000	11794000	25936000	29266000	19836000	13265000	21222000	33089000	13342000	0	0	5744000	9545700	30694000	27529000	43775000	8853400	22925000	9389400	28484000	20333000	15456000	8977100	15945000	23859000	10765000	0	11607000				307;308			7	7	7	67.8	67.8	67.8	6.6687	0	72.034	1359300000	993	59	P05747
44959000	11775000	13944000	12067000	27558000	41366000	63486000	20695000	38960000	75280000	61867000	12501000	18457000	109980000	44134000	76634000	26842000	42172000	11603000	34306000	102200000	138220000	50972000	15238000	127750000	43815000	73086000	85070000	10882000	0	235360000				309;310;311;312;313			11	11	11	71.1	71.1	71.1	24.422	0	30.971	4514700000	458	204	P05748;P54780
3185400	11380000	3140100	15271000	7325100	11450000	9551200	10388000	15614000	11897000	14894000	0	25230000	19889000	0	1746500	5423300	12231000	6888900	4035800	18593000	3865700	4996200	6948700	28918000	4173600	7755000	6738700	18310000	0	26161000				314;315		10	9	9	9	61.7	61.7	61.7	26.502	0	211.55	833260000	176	240	P05750
9724100	3219900	0	0	0	0	0	0	0	0	0	0	0	9172200	0	0	0	0	9285400	0	2627300	0	0	0	0	0	0	0	0	0	0				316;317;318;319;320;321			8	8	8	49.7	49.7	49.7	17.029	0	35.66	151380000	33	151	P05756
41674000	38874000	51414000	28519000	52092000	62760000	54316000	46442000	59940000	51295000	45900000	44084000	52200000	56392000	53454000	73854000	54755000	52114000	51214000	49742000	51874000	68531000	73886000	41066000	74360000	57902000	56466000	65111000	31498000	52356000	44645000				322;323;324;325;326;327;328;329;330;331;332;333;334	43		30	30	17	86.8	86.8	47.4	17.216	0	297.45	4381800000	1751	152	P05759;P0CG63
0	0	0	0	0	0	0	0	0	0	0	0	0	1485500	0	0	0	0	0	0	0	0	0	0	0	0	0	0	0	0	0				335			1	1	1	5.8	5.8	5.8	22.362	0	3.0078	7998600	5	191	P06100
0	0	0	0	0	0	0	0	0	0	0	0	0	319220	0	0	0	0	0	0	0	0	0	0	0	0	0	0	0	0	0	+			336			2	2	2	2.3	2.3	2.3	134.81	1	-2	691590	2	1222	P06105
12637000	6968600	13019000	5162700	3624000	6272000	3460100	4478800	7394700	4597200	2683300	3859600	4506800	14416000	9797400	6971400	5261800	7483000	9924000	4717800	3550200	7248000	10595000	4219000	2356900	8766300	6079700	3051500	3534500	0	0				337;338;339;340;341;342;343;344;345;346;347	45		18	18	17	33	33	30.6	61.495	0	92.13	507550000	278	563	P06169;P26263
0	1842600	3203500	0	0	0	0	0	2605000	0	0	0	0	3418300	5788300	0	0	0	4169200	0	0	0	0	3230100	11463000	0	0	0	3350100	0	0				348;349;350	47		4	4	4	51.8	51.8	51.8	14.536	0	62.667	165050000	53	137	P06367;P39516
2527800	4283200	7623700	1526300	4052000	4308100	3577900	2563500	2522100	0	0	0	0	0	2540400	0	0	0	0	0	1034200	0	0	0	0	1774700	0	0	0	0	0				351;352;353			6	6	6	15.7	15.7	15.7	63.261	0	21.755	130520000	75	562	P06700
0	5192200	14845000	5473600	13092000	17849000	14362000	8707500	10213000	13489000	9357600	5184600	6882300	7539200	12320000	5474400	3919400	3065300	2163600	0	3272100	2240900	0	2352200	0	7200700	5303300	4438600	0	0	0				354;355;356;357;358	49		8	8	8	7.9	7.9	7.9	111.36	0	99.797	480850000	147	978	P06701
0	0	0	0	0	0	0	0	0	0	0	0	0	1206900	0	0	0	0	0	0	0	0	0	0	0	0	0	0	0	0	0				359;360			2	2	2	2.7	2.7	2.7	103.27	0	2.9961	17261000	7	902	P06738
0	0	0	0	0	0	0	0	0	0	0	0	0	0	3068400	0	0	0	0	0	0	0	0	0	0	0	0	0	0	0	0	+			361			1	1	1	2	2	2	126.37	1	-2	16481000	1	1100	P06777
0	0	0	0	0	0	3357500	1509300	15262000	17479000	16262000	18112000	19239000	28604000	37521000	202180000	66166000	71494000	26479000	90194000	40921000	157430000	94252000	54830000	27672000	265850000	215740000	199290000	51237000	53486000	102650000				362;363;364;365;366;367;368;369;370			14	14	14	26.5	26.5	26.5	52.403	0	289.57	3978300000	902	471	P06778
19498000	26936000	21620000	18446000	63394000	79723000	45906000	50982000	74561000	60791000	52016000	103770000	70906000	130560000	157850000	116850000	64996000	51196000	64494000	103600000	36946000	168900000	66075000	42919000	61064000	77590000	62368000	87664000	22774000	0	78093000				371;372;373;374;375;376		11;12;13;14;15;187;188;189;190	11	11	11	6.8	6.8	6.8	164.21	0	323.31	5282500000	1195	1428	P06786
0	0	0	0	0	0	0	0	0	0	0	0	0	959660	0	0	0	0	0	0	0	0	0	0	0	0	0	0	0	0	0	+			377			1	1	1	11.6	11.6	11.6	16.135	1	-2	2435600	4	147	P06787
0	0	0	0	4053900	4760200	11903000	3420600	8073400	7991600	27234000	0	0	0	0	2822900	4628400	12798000	0	0	9949100	10110000	4602200	0	0	2468900	0	11158000	0	0	0				378	62		5	4	4	30.6	30.6	30.6	24.254	0	11.99	467130000	187	222	P07170
0	0	0	0	0	0	0	0	0	0	0	0	0	0	0	0	0	0	0	0	0	0	104190	0	0	0	0	0	0	0	0				379	63	191	1	1	1	2.4	2.4	2.4	86.067	0.009434	1.3914	12379000	2	802	P07244
12212000	0	7080900	0	27820000	0	111260000	45354000	63551000	49756000	89827000	24003000	0	0	7791200	21718000	38215000	65716000	0	0	24130000	57198000	22041000	17639000	0	11673000	31251000	16035000	0	0	0				380			10	5	4	28.3	16.3	13.9	40.369	0	9.139	2227000000	476	375	P07246
6746900	2305200	0	0	1202500	1455600	0	1004800	1939400	1248500	1351700	0	2064700	0	0	1398600	2482000	1396200	1202200	1707100	1428500	1833900	1465400	999360	3736800	0	4286500	0	1217800	0	0				381;382			2	2	2	10.8	10.8	10.8	24.254	0	19.438	126190000	48	213	P07260
2259600	2560700	4230600	1328300	0	0	0	0	0	0	0	0	0	0	1930700	0	0	0	0	0	0	0	0	0	0	0	0	0	0	0	0				383;384			4	4	4	7	7	7	87.728	0	6.7489	46637000	18	785	P07261
0	0	0	0	0	0	0	0	0	0	0	0	0	0	1761100	18317000	1980900	2516300	1471400	2963400	2665600	3521000	3493500	0	0	20047000	3173500	10921000	0	0	0				385;386;387;388			4	4	4	3.6	3.6	3.6	97.681	0	5.5162	156650000	62	859	P07271
0	0	0	0	0	0	0	0	0	0	0	0	0	1363100	0	0	0	0	0	0	0	0	0	0	0	0	0	0	0	0	0				389	66		2	2	2	7.8	7.8	7.8	34.843	0	5.234	17909000	7	309	P07273
1826000	0	2355400	1161200	2726000	2531700	1501200	0	3921200	0	0	3384500	0	5163800	6061600	2056600	2756400	3419600	5872000	2047500	2467300	2533300	2425500	2831800	0	2873700	0	0	0	0	0				390;391;392;393;394;395			7	7	7	54.9	54.9	54.9	15.891	0	18.976	182720000	72	144	P07281;P07280
512590000	471140000	758500000	1625400000	887310000	1028800000	902300000	1982100000	1138400000	1020000000	1074000000	2736000000	2813500000	389220000	28199000	707600000	1455500000	814730000	2180300000	981540000	789010000	945090000	846460000	4084100000	546350000	787980000	1095900000	725260000	3517700000	3045200000	1019600000				396	68;69;70;71;72		38	38	38	92	92	92	46.085	0	323.31	150890000000	14284	424	P07991
41702000	49653000	68201000	7871600	67640000	60666000	42167000	0	52366000	46061000	48454000	0	0	0	0	93264000	100230000	67935000	0	0	58843000	112180000	0	0	0	133310000	87858000	85305000	0	0	0				397;398		16	3	3	3	2.7	2.7	2.7	174.75	0.0020141	2.4606	3063500000	150	1588	P08566
45613000	41405000	138200000	103300000	126910000	130060000	173730000	176290000	108100000	202350000	372950000	140640000	131020000	474540000	22373000	157060000	178460000	227710000	67992000	216750000	226480000	206460000	111810000	235110000	372340000	167760000	113180000	144370000	126890000	115460000	223290000				399			14	14	14	32.6	32.6	32.6	69.621	0	323.31	12402000000	1644	635	P09232
0	0	0	0	0	0	0	0	0	0	0	0	0	0	0	0	0	0	0	0	0	0	0	0	0	0	0	524630	0	0	0				400;401			3	3	3	10.7	10.7	10.7	49.799	0	15.628	30744000	11	447	P09733;P09734
0	0	0	0	0	0	0	0	0	0	0	0	0	580750	2013600	0	0	0	4817700	0	0	0	0	1047600	0	0	0	0	660900	0	0				402;403			5	5	5	17.8	17.8	17.8	46.147	0	5.4341	52737000	16	399	P09938
0	0	0	0	0	0	0	0	0	0	0	0	0	0	2329900	0	0	0	0	0	0	0	0	0	0	0	0	0	0	0	0				404;405;406;407;408;409;410;411	82		9	1	1	70.4	13	13	12.009	0	3.4098	24122000	4	108	P0C0T4
0	0	3023800	2850400	0	2326500	0	3369800	3009600	3530200	4917200	3076900	1781700	1798300	2305700	2997300	2550000	2992100	8562500	0	0	4702600	4127000	4873200	6126000	1879600	1343700	1961100	0	0	0				412;413;414;415	83		6	6	6	48.3	48.3	48.3	9.7597	0	33.159	252680000	87	87	Q3E754;P0C0V8
0	0	0	0	0	0	0	0	0	0	0	0	0	4340200	0	0	0	0	0	0	0	0	0	0	0	0	0	0	0	0	0				416;417;418	84		2	2	1	20.9	20.9	16.4	7.5647	0	30.717	457520000	300	67	P0C0X0
25332000	34015000	21552000	12103000	29748000	27887000	23071000	11368000	24476000	24826000	26183000	12624000	9296700	18077000	16341000	30270000	24990000	26036000	11593000	18640000	30592000	31898000	26838000	8072900	29287000	28120000	24491000	23152000	8759300	11604000	21007000				419;420;421;422;423			13	13	13	79.4	79.4	79.4	15.531	0	58.388	1571100000	1119	136	P0C2H6;P0C2H7
1659200	1318500	1665700	2725600	1894900	3711800	2725000	3135400	4224700	1165100	1475600	2991100	0	0	8686300	2143000	1906200	3897000	8349800	3343600	5649400	2478700	4171500	3913000	5919400	3998900	1846800	1340000	2367500	0	0				424;425;426;427;428			8	8	8	77	77	77	12.953	0	23.104	347410000	132	113	P0C2H8;P0C2H9
39433000	31957000	33921000	144820000	28557000	15415000	30847000	149560000	22564000	15396000	23420000	6971000	0	0	0	13401000	11295000	10036000	11067000	16615000	6876800	5293800	11986000	12533000	24573000	4377000	5627400	4179700	6230500	0	9602600				429;430	85;86		9	9	8	7.3	7.3	5.7	202.13	0	323.31	3052000000	727	1770	Q12501;Q12113;Q07791;Q03494;P25384;P0C2J3;Q12491;Q12472;P0CX64;P0CX63;Q99303;Q12439;Q12392;Q12293;Q12260;Q03483;P25383;P0C2J4;P0CX62;P0CX61
15848000	15018000	13484000	5488600	8565800	8168100	2837700	552010	16388000	10064000	0	0	13174000	0	17216000	11339000	6659500	3974000	0	8319000	5108400	17357000	6484500	1424900	4093700	12943000	12127000	9317900	2135400	0	6593700				431;432;433		19;20	3	3	3	1.8	1.8	1.8	166.11	0	24.906	549450000	250	1502	P0CE41
6756100	0	3217400	2751900	4726700	2511900	2196200	3700600	5354400	0	2419700	4997600	3064100	14461000	21114000	0	6035200	3283500	6955900	0	0	0	0	4537900	0	0	4990400	3951000	2480800	0	1473600				325;326;329;330;331;332;434;435;436	43		19	6	6	80.5	33.6	33.6	14.554	0	10.305	340240000	118	128	P0CH09;P0CH08
17885000	6952200	26919000	15116000	15965000	15676000	13017000	15412000	17080000	10259000	11819000	12162000	12930000	7871600	8853800	10309000	18189000	17050000	30390000	9373000	11493000	16534000	14172000	7216300	10158000	9976600	8398500	13207000	5495400	0	9188500				437;438;439;440;441;442;443;444;445			12	12	12	92	92	92	8.5897	0	64.378	1126600000	711	75	P0CT04
56343000	61048000	48934000	43369000	57874000	57156000	51872000	39603000	46769000	47477000	51560000	40976000	26433000	46159000	36047000	48780000	59481000	63742000	45206000	43865000	51837000	54934000	47803000	27440000	48698000	50690000	45220000	42294000	26956000	30241000	45761000				446;447;448;449;450;451;452;453	87		14	14	14	64	64	64	20.437	0	57.142	3703800000	2004	172	P0CX24;P0CX23
6346000	2900800	6535600	1116400	6902100	6063900	7726500	3007500	6737100	6629000	6875700	2856100	5561600	0	9180700	7826300	4892700	5095800	7759600	6203400	7697900	9001300	7432500	2642700	17054000	7498600	7930200	6622800	2521500	0	6331300				454;455;456;457			9	9	9	37.7	37.7	37.7	12.211	0	19.1	417730000	217	106	P0CX28;P0CX27
0	0	0	2133700	0	0	0	2519700	0	1782100	0	0	0	29990000	4584100	0	0	0	7921900	0	0	0	0	3643200	8141300	1140700	0	0	0	0	0				458;459;460;461;462;463			9	9	9	62.1	62.1	62.1	16.038	0	18.224	164490000	63	145	P0CX30;P0CX29
4705900	3719000	3316600	1754800	4075800	3137900	0	5251200	3659900	3417200	4022100	0	0	6817100	3905500	3019700	7776600	0	4743000	2442700	3077700	4652100	5651000	0	0	2665000	2724600	0	0	0	0				464;465;466;467;468;469			7	7	7	60.7	60.7	60.7	15.329	0	16.633	232570000	95	135	P0CX32;P0CX31
0	0	0	665810	1055600	0	0	2615200	0	0	0	3643800	0	0	954880	1027500	0	0	5917600	1932100	1395100	0	1571200	1179100	0	0	0	0	1993400	0	0				470;471;472	89		5	5	5	63.5	63.5	63.5	7.1184	0	5.5276	134940000	30	63	P0CX34;P0CX33
34918000	24959000	42475000	49058000	63170000	64252000	100470000	52999000	66427000	78200000	75574000	48336000	55192000	56531000	65378000	53899000	76466000	173770000	39842000	114580000	108200000	115840000	106650000	36884000	85763000	45460000	71776000	130720000	22182000	0	92455000				473;474;475;476;477;478;479;480;481	90		18	18	18	80.1	80.1	80.1	29.41	0	135.97	5188400000	1582	261	P0CX36;P0CX35
0	0	0	0	0	0	0	0	0	0	0	0	0	1741800	0	0	0	0	0	0	0	0	0	0	0	0	0	0	0	0	0				482;483;484;485			6	6	6	43.6	43.6	43.6	26.996	0	21.442	27997000	32	236	P0CX38;P0CX37
352320000	454300000	363650000	885850000	266720000	336550000	259210000	234820000	308090000	356710000	373480000	111160000	270610000	103790000	328730000	310220000	366520000	336340000	92696000	223290000	294010000	415760000	238960000	212200000	540640000	376090000	487650000	417800000	294210000	9136600	333760000				486;487;488;489;490			16	16	16	79.5	79.5	79.5	22.489	0	193.87	23099000000	1407	200	P0CX40;P0CX39
2480100	2647900	0	1347900	8606500	3113800	8761600	3378700	18146000	15816000	5470800	0	3073300	0	0	2388100	3457800	5786500	2600400	0	14132000	1898600	4010100	4541500	0	1607800	1453900	2304800	4395700	0	1425100				491;492;493	91		4	4	4	57.7	57.7	57.7	14.473	0	145.97	472190000	515	137	P0CX42;P0CX41
2279700	0	0	0	0	0	0	2009900	2387500	0	3597600	0	1595400	2600500	1896700	0	0	0	1216400	0	2708500	0	0	1059900	1555200	1521600	0	0	0	0	1133800				494;495;496;497			7	7	7	49.3	49.3	49.3	24.485	0	25.4	85896000	35	217	P0CX44;P0CX43
271860000	490980000	483970000	168370000	303230000	380000000	646610000	314660000	186670000	345960000	495810000	177470000	676030000	47585000	14556000	208610000	326200000	369500000	122810000	278840000	261980000	306710000	335550000	190210000	412890000	171440000	223190000	199150000	271750000	319770000	145010000				498;499	92		24	24	24	91.7	91.7	91.7	27.408	0	323.31	25044000000	8323	254	P0CX46;P0CX45
38182000	38299000	39464000	32064000	41785000	36810000	44435000	39054000	45343000	43516000	42237000	19171000	29294000	41825000	36370000	25855000	41622000	33703000	31600000	56003000	38291000	33118000	33895000	16461000	90692000	27218000	33526000	35405000	20143000	24536000	55747000				500;501;502;503;504;505;506			17	17	17	95.5	95.5	95.5	17.749	0	300.84	3136100000	967	156	P0CX48;P0CX47
16813000	7015400	9375900	19924000	13199000	14869000	22316000	16739000	16276000	14883000	17331000	15969000	8910000	28297000	28933000	3688400	10139000	12727000	13743000	7249300	15533000	16787000	5162300	12285000	19676000	3029600	5631300	13240000	15872000	0	14505000				507;508;509;510			13	13	13	75.3	75.3	75.3	20.563	0	113.82	1136800000	408	186	P0CX50;P0CX49
3820600	0	3198500	2168300	2876200	2059300	2593500	1534300	5484700	2426100	1803000	5163200	1595600	1930500	7743400	3941100	0	0	4861200	0	3199400	4411700	7172900	2327900	7178300	5336800	2557000	3195800	1248300	0	2291700				511;512;513;514;515;516;517;518;519;520			11	11	11	90.2	90.2	90.2	15.847	0	30.978	274200000	135	143	P0CX52;P0CX51
4773400	0	5143500	2394600	3812200	2586500	3306700	3150500	3579000	0	2058900	3331800	2564300	0	5611000	3065400	2781100	3435300	3744600	3845100	3332300	0	4416600	2500700	5342600	4630300	2924200	2766600	2332400	0	2773000				521;522;523;524;525			9	9	9	54.5	54.5	54.5	17.822	0	33.106	275840000	228	165	P0CX54;P0CX53
10131000	4279800	5026400	12906000	9277300	8117300	16984000	4268500	8529900	17221000	25581000	8036300	8340600	31279000	11494000	3383600	7760000	22027000	14399000	6364800	17648000	9538800	4631600	7437600	19104000	5069400	14040000	8343100	9374400	0	7466700				526;527;528;529;530			14	14	14	89.7	89.7	89.7	17.037	0	157.39	797620000	330	146	P0CX56;P0CX55
0	0	0	0	0	0	0	0	0	0	0	0	0	0	0	0	0	0	7649300	0	0	0	0	3170900	0	0	0	0	2180100	0	0				531;532;533			4	4	4	52.5	52.5	52.5	6.6504	0	133.46	109320000	64	61	P0CX81;P0CX80
7049500	8762900	10452000	7287000	8684600	8748400	0	6615700	11832000	9638700	6166700	7529800	5017400	0	23506000	16132000	10642000	12990000	10797000	9615400	12090000	25811000	18654000	4292900	30859000	27529000	38729000	48712000	3571400	0	9959800				534;535;536;537;538;539;540;541;542			9	9	9	50.3	50.3	50.3	21.704	0	20.804	983510000	244	189	P0CX83;P0CX82
23066000	21051000	16844000	21371000	20660000	18541000	16778000	21617000	17010000	15827000	14701000	23613000	9170500	14250000	30372000	14691000	23008000	24575000	22297000	18013000	16184000	14625000	25225000	14471000	25760000	16736000	22405000	13920000	15544000	22729000	20043000				543;544;545;546;547;548;549;550;551;552;553;554			13	13	13	82.5	82.5	82.5	13.909	0	97.406	1636800000	721	120	P0CX85;P0CX84
0	0	0	0	0	1096900	0	0	0	0	0	0	0	0	0	0	0	0	0	0	0	0	0	0	0	0	0	0	0	0	0				555		21	1	1	1	8.6	8.6	8.6	20.413	0.0093379	1.3499	22330000	7	175	P0CY07;P0CY06
0	0	0	0	0	0	0	0	0	0	0	0	0	2167300	0	0	0	0	0	0	0	0	0	0	0	0	0	0	4972900	0	0				556;557;558			5	5	5	23.1	23.1	23.1	32.989	0	23.139	82004000	24	294	P10080
0	0	0	0	0	0	0	0	0	0	2737700	0	0	0	0	0	0	0	4975500	0	0	0	0	0	0	0	0	0	0	0	0				559;560	93;94		7	7	7	23.5	23.5	23.5	44.697	0	16.665	376790000	44	395	P10081
0	0	0	0	8864000	8908000	6143300	8088100	3933900	0	3956500	0	0	0	0	0	0	0	7998700	0	0	0	0	0	0	0	0	0	0	0	0				561			4	4	4	10.5	10.5	10.5	47.69	0	18.427	189150000	97	409	P10363
2798700	4260500	4406900	3158800	0	3604700	2811400	2141200	2323300	4468900	3941200	3092000	0	3295500	1998600	0	2886400	2653200	2966400	0	3799900	3828900	0	3310100	0	4674100	3018000	2654600	0	0	0				562;563;564;565			14	14	2	27.4	27.4	3.6	69.656	0	161.82	202510000	104	642	P10591;P09435
0	0	0	0	0	0	0	0	0	0	0	1032400	0	0	0	0	0	0	0	0	0	0	0	0	0	0	0	0	0	0	0				562;563;565;566			14	2	2	27.9	3.9	3.9	69.469	0	30.529	17750000	5	639	P10592
5016600	2593400	3934200	1159800	1758000	0	1193900	0	0	0	1548300	0	0	0	1029400	0	0	0	540760	0	0	0	0	0	0	0	0	0	0	0	0				567			2	2	2	8.5	8.5	8.5	10.667	0.0056497	1.9579	63664000	54	106	P10622
55480000	58299000	38574000	104060000	48856000	58237000	30897000	83411000	32944000	36655000	31461000	115360000	0	70740000	4398500	8460500	23863000	18383000	64068000	17378000	24884000	17764000	15211000	57508000	91563000	14271000	19525000	11038000	69225000	81107000	75552000				568;569;570;571			9	9	9	44.8	44.8	44.8	39.092	0	198	3950100000	927	362	P10664;P49626
0	0	0	0	0	0	0	0	0	0	0	0	0	959020	0	0	0	0	0	0	0	0	0	0	0	0	0	0	0	0	0				572			1	1	1	7.5	7.5	7.5	35.695	0	14.064	6926900	5	306	P10962
24474000	8272300	23019000	45774000	34314000	49494000	64093000	129640000	30062000	36161000	42916000	75362000	73642000	75816000	32004000	31098000	30320000	28263000	61011000	32778000	22149000	21688000	19481000	54234000	48720000	13037000	29272000	21961000	68391000	39538000	24730000				573;574;575;576;577;578;579;580;581;582;583;584;585	95;96;97		41	41	41	84.2	84.2	84.2	60.983	0	323.31	4647900000	1534	549	P10963;REV__Q12532
0	0	0	0	0	0	0	0	0	0	0	0	0	0	0	0	0	0	0	0	0	0	0	2651800	0	0	0	0	0	0	0				586			2	2	2	7.1	7.1	7.1	57.521	0	21.199	174920000	42	505	P11412
0	0	0	0	0	0	0	0	0	0	3972600	0	0	3568900	0	0	0	0	0	0	0	0	0	0	0	0	0	0	0	0	0				587;588;589;590;591			13	13	13	30.5	30.5	30.5	66.594	0	109.59	54392000	25	613	P40150;P11484
3692400	0	0	2103800	2708400	1753500	1456200	3614300	4213700	3744700	0	0	0	0	0	9871800	3778500	0	6418500	0	12077000	4401400	0	42772000	0	6734600	0	3779700	32774000	0	0				592			7	7	7	18.7	18.7	18.7	63.003	0	54.152	683430000	40	566	P11491
0	0	0	0	0	0	0	0	0	0	0	0	0	0	0	0	0	0	0	0	0	0	0	0	0	0	0	0	591590	0	0				593;594			1	1	1	21.5	21.5	21.5	10.802	0	3.2713	6928200	1	93	P11632
7693600	6759200	13083000	1834000	9717300	18110000	9267900	5395800	30055000	16709000	16109000	7028100	0	0	53018000	71184000	14046000	22091000	18160000	0	35149000	43349000	62210000	0	0	104930000	43071000	78686000	5864600	0	0				595;596;597;598;599;600			10	10	10	18.4	18.4	18.4	92.412	0	66.204	1633500000	330	827	P11938
18899000	31902000	76082000	18069000	56477000	68033000	47829000	37091000	70708000	46474000	23869000	24578000	78463000	158440000	248990000	136920000	33999000	20185000	14076000	76764000	104040000	74349000	90593000	16407000	46800000	218880000	158450000	225770000	22406000	48623000	36990000				601;602;603;604;605;606;607;608;609;610;611;612;613;614;615;616;617;618;619;620;621;622;623;624;625;626;627;628;629	100;101;99	195;196;25;26;266;27	41	41	41	31.8	31.8	31.8	152.06	0	239.51	7862000000	863	1358	P11978
9657600	7905300	10808000	0	6146100	0	0	3261300	10024000	5770100	7342000	4059000	0	0	11478000	12056000	4889100	0	11354000	0	4665700	4784200	0	0	0	7212000	8290200	5681100	0	0	0				630			4	4	4	3.7	3.7	3.7	121.79	0	131.03	410780000	79	1068	P12383
8012100	6672400	7251100	4601800	5904600	5306300	4946100	3153200	3894000	4236300	5809800	3549300	4131000	3866600	12388000	4836100	0	4858500	2255800	0	0	0	4625700	1975800	5459600	3258600	3211400	0	1967700	0	4830200				631			6	6	6	16.4	16.4	16.4	61.298	0	20.844	349340000	191	554	P12709
0	0	0	0	0	0	0	0	0	0	0	0	0	3674100	0	0	0	0	0	0	0	0	0	0	0	0	0	0	0	0	0				632			1	1	1	5.3	5.3	5.3	40.471	0	5.8292	7897100	5	359	P12887
0	0	0	0	6957600	9439600	5167300	0	26523000	19102000	10910000	13526000	24443000	20129000	28087000	70506000	39911000	30160000	17771000	69532000	30528000	26376000	32324000	15845000	15408000	41999000	27681000	26424000	19196000	0	26589000				633;634;635;636	102	28;29;30	7	7	7	5.6	5.6	5.6	134.3	0	203.59	1528100000	587	1174	P12954
0	0	0	0	0	0	0	0	0	0	0	0	0	0	0	5100700	0	0	2151000	0	0	0	0	3925000	0	4695600	3126100	0	2708100	0	0				637;638			2	2	2	4.9	4.9	4.9	74.37	0	6.3891	85799000	31	656	P13099
0	0	0	0	0	0	0	960400	0	0	0	0	0	0	4027900	0	0	0	0	0	0	0	0	0	0	0	0	0	0	0	0				639			2	2	2	0.8	0.8	0.8	166.81	0	3.1959	20055000	8	1468	P13382
19849000	28070000	30648000	12649000	12268000	11377000	13040000	16008000	15115000	13129000	13043000	16539000	8501000	0	19988000	13238000	13936000	10483000	14154000	0	5934700	10503000	11920000	4695400	0	12116000	12705000	11183000	4812700	0	0				640;641;642;643;644;645			12	12	12	38.8	38.8	38.8	27.003	0	117.61	1102000000	489	240	P13393
0	0	0	0	0	0	0	0	0	0	0	0	0	0	397110	0	0	0	0	0	0	0	0	0	0	0	0	0	0	0	0				646			1	1	1	2.2	2.2	2.2	77.866	0.0072464	1.6825	8297700	2	688	P13574
0	0	0	0	0	0	0	0	0	0	0	0	0	886540	0	0	0	0	0	0	0	0	0	0	0	0	0	0	0	0	0				647			3	3	3	15.2	15.2	15.2	17.378	0	2.9324	108320000	4	151	P13902
0	0	0	0	0	0	0	0	0	0	0	0	0	406180	0	0	0	0	0	0	0	0	0	0	0	0	0	0	0	0	0				648			1	1	1	3.6	3.6	3.6	62.411	0.0093141	1.3425	1370800	1	554	P14064
5657600	7538300	6806500	4001100	7368000	4448000	3288900	3373800	4505900	3837000	3624500	5128800	4200300	2592800	20044000	8422400	5468400	4177700	3781500	5434300	5459900	6452500	7617700	3111300	11962000	9709400	7750700	7768400	5830000	8701000	8065900				649;650;651;652;653			9	9	9	72.4	72.4	72.4	11.415	0	64.309	502860000	229	105	P14120
899380000	1386400000	1349800000	738250000	346360000	725430000	502440000	631720000	210080000	396020000	361200000	544530000	1514600000	1289300000	491280000	738670000	505850000	345570000	523560000	769330000	300350000	254460000	302160000	701970000	433430000	470340000	260400000	233480000	930010000	800390000	305530000				654;655;656;657;658;659	103;104;105;106		42	42	42	75.7	75.7	75.7	43.757	0	323.31	62999000000	9345	387	P14126
232430000	239990000	222600000	193050000	185630000	184270000	192400000	129650000	266940000	230320000	246560000	152720000	215780000	232160000	246660000	312940000	194400000	242300000	197490000	429950000	314480000	390250000	256770000	251820000	460920000	284170000	241200000	329620000	264220000	318880000	468400000				660;661;662;663;664;665;666;667;668;669;670;671	107;108	197;34	40	40	40	40.8	40.8	40.8	81.752	0	323.31	21384000000	4676	731	P14164
0	0	0	0	36086000	56090000	28190000	11278000	48791000	39626000	22819000	40215000	76115000	89814000	49979000	204780000	71822000	57758000	30212000	104840000	58104000	79641000	117530000	63191000	19908000	98561000	62071000	74655000	20218000	5217500	22738000				672;673;674;675;676;677;678;679;680;681;682;683;684;685;686;687;688;689;690;691;692;693;694;695;696;697;698;699;700;701		35	35	35	35	35.1	35.1	35.1	95.537	0	323.31	3635800000	1276	827	P14291
80145000	50525000	50363000	66337000	79248000	65698000	107450000	91328000	78585000	64432000	91616000	67027000	72732000	62883000	79802000	43253000	42873000	66995000	85514000	52635000	46804000	41934000	35959000	59676000	93285000	33814000	33204000	43302000	63147000	68388000	50579000				702;703;704;705;706;707;708;709;710;711;712;713;714;715;716;717;718;719	109;110;111		34	34	34	81.3	81.3	81.3	39.62	0	323.31	5912400000	1967	359	P14540
16499000	21465000	25196000	13391000	16449000	19182000	16543000	14095000	18643000	17301000	16518000	16054000	11210000	11180000	7036300	13609000	20049000	17930000	22386000	17001000	12665000	21426000	16550000	13954000	14800000	15170000	11125000	15967000	11910000	10318000	13270000				720;721;722;723;724;725;726;727			14	14	12	65.4	65.4	65.4	17.39	0	197.48	1421800000	975	162	P14832
0	0	1280000	704240	0	0	0	1366200	2301500	0	0	0	0	1981600	11616000	0	0	0	8893800	0	3668200	0	0	0	0	0	0	0	0	0	0				728;729;730	113		3	3	3	5.7	5.7	5.7	107.2	0	15.919	135520000	30	966	P14922
0	0	0	0	0	0	0	0	0	0	0	0	0	0	0	0	0	0	3948400	0	0	0	0	0	0	0	0	0	0	0	0				731;732;733			2	2	2	12.8	12.8	12.8	37.036	0	6.7278	30979000	7	335	P15019
9981400	11606000	11661000	17152000	6175800	8442300	8513500	5071300	9185000	7444000	12054000	7578200	10421000	7502800	10076000	14985000	9469800	12903000	17215000	9782400	13894000	20706000	11312000	15191000	12464000	26957000	31142000	25153000	12141000	0	11208000				177;182;183;184;185;186;734;735;736;737;738			14	14	5	22	22	6.5	80.899	0	145.14	997620000	395	705	P15108
0	0	0	0	0	0	0	2597700	0	3214300	0	0	0	0	0	0	0	0	0	0	0	0	0	0	0	0	0	0	1625700	0	0				739			3	3	3	9.1	9.1	9.1	67.958	0	26.1	114020000	23	591	P15180
0	0	0	0	0	0	0	0	0	0	0	0	0	0	0	0	0	0	582910	0	0	0	0	0	0	0	0	0	0	0	0				740			2	2	1	2.4	2.4	1.8	124.62	0	3.4805	116140000	3	1097	P15436
0	0	0	0	0	0	0	0	0	0	0	0	0	0	0	0	0	0	603140	0	0	0	0	0	0	0	0	0	0	0	0				741			1	1	1	6.4	6.4	6.4	20.637	0.0072661	1.7056	3546900	1	187	P15454
0	0	0	0	0	0	0	0	0	0	0	0	0	0	0	0	0	0	0	0	0	0	0	0	0	10650000	0	0	0	0	0	+			742		267	1	1	1	2.2	2.2	2.2	67.364	1	-2	117140000	5	595	P15624
0	0	0	0	0	0	0	0	0	0	0	0	0	0	0	0	0	0	377490	0	0	0	0	0	0	0	0	0	0	0	0	+			743;744			2	1	1	12.8	7.4	7.4	16.456	1	-2	2869800	2	148	P15731
0	0	0	0	0	0	0	0	0	0	0	0	0	0	0	0	0	0	0	0	941720	0	0	0	0	0	0	0	0	0	0				744			2	2	1	17.6	17.6	12.2	16.28	0	7.9493	30095000	18	148	P15732
51848000	224300000	219080000	1164500000	7212900000	4772200000	2032900000	9573700000	2562200000	3834400000	1701300000	12551000000	4975600000	5891200000	38824000	1699600000	2101400000	3009600000	9219300000	816160000	946800000	1449600000	1477000000	6626200000	359480000	1094000000	884650000	1010200000	4175500000	2381600000	577540000				745;746;747;748	116;117	198;199	16	16	16	63.2	63.2	63.2	28.916	0	323.31	396930000000	8655	258	P15873
0	0	0	0	0	0	0	0	0	0	0	0	0	556260	0	0	0	0	0	0	0	0	0	0	0	0	0	0	0	0	0				749;750;751			3	3	3	7.8	7.8	7.8	65.575	0	4.8008	21410000	10	592	P15891
0	0	0	0	0	0	0	0	0	0	0	0	0	0	515430	0	0	0	0	0	0	0	0	0	0	0	0	0	0	0	0	+			752			1	1	1	3.5	3.5	3.5	35.297	1	-2	1355700	2	318	P16370
4218900	6543400	7256900	1682300	3468500	2764000	4716500	1893900	4381400	2568800	5806700	1852300	3500900	4241100	11624000	3469500	2992900	5733500	6800200	3438100	9899700	0	4091900	2160300	0	5326600	4929900	6275600	2169700	0	0				753;754;755;756;757;758;759;760			11	11	11	19.9	19.9	19.9	78.307	0	45.363	334040000	160	713	P16649
7114900	2878100	7925700	5089900	0	2616300	2251700	4050900	3211000	0	1625900	3825800	0	0	2184000	1303300	1918500	0	2854700	1440800	0	0	0	0	0	0	0	0	0	0	0				761;762;763			5	5	5	45.2	45.2	45.2	9.6144	0	23.26	174380000	46	84	P16965
51730000	64079000	65284000	69735000	44224000	40846000	30199000	59557000	34765000	29176000	25023000	88780000	47252000	17877000	11384000	34201000	38140000	25793000	57992000	53464000	30306000	24000000	30586000	59786000	40562000	37819000	32269000	22653000	54191000	36338000	34862000				764;765;766;767;768;769;770;771;772;773;774;775;776	118		16	16	16	57	57	57	28.124	0	97.726	3917600000	1055	256	P17076;P29453
8120200	6763500	9162900	0	5509500	6929100	4748900	4652100	5523500	7187600	10769000	3662500	0	5766300	11608000	8962500	3763000	0	7991400	0	7531400	8554000	0	3270400	0	0	5548200	8214100	3951500	0	0				777;778;779;780;781;782;783			7	7	7	31.6	31.6	31.6	39.387	0	74.54	417610000	83	351	P17106
0	0	0	0	0	0	0	0	0	0	0	0	0	355090	0	0	0	0	0	0	0	0	0	0	0	0	0	0	0	0	0				784			2	2	2	6	6	6	23.54	0.0072529	1.7008	65399000	5	199	P17536
0	0	0	0	0	0	0	1871300	1346900	0	0	0	0	0	1314100	0	0	0	4732200	0	0	0	0	1792700	0	1368800	0	0	0	0	0				785;786			6	6	6	18.9	18.9	18.9	26.531	0	20.667	69809000	27	233	P17891
53216000	83081000	44758000	79919000	122610000	133240000	137600000	67034000	182400000	187940000	140780000	46311000	93602000	66992000	16761000	59253000	67451000	113040000	241220000	158620000	101440000	95166000	83719000	221980000	176310000	52126000	78736000	81575000	99850000	21552000	231710000				787	122;123;124		16	16	16	55	55	55	34.426	0	323.31	11786000000	2109	318	P18239;P18238
145630000	75266000	104720000	24919000	2081400	1085600	845470	2156900	1658700	1609500	853870	0	0	0	6479300	0	0	0	1249600	0	576370	0	0	0	0	0	0	0	0	0	0				788;789;790;791;792;793;794;795;796;797;798			14	14	14	23.9	23.9	23.9	55.157	0	128.07	1105400000	316	486	P18412
0	0	0	1840600	0	0	0	1473700	0	0	0	0	0	0	0	0	0	0	0	0	0	0	0	0	0	0	0	0	0	0	0				799			6	6	6	4.7	4.7	4.7	206.94	0	7.9443	83243000	36	1887	P19097
2084000	3643200	0	0	0	0	0	0	0	0	0	0	0	0	0	0	0	0	0	0	0	0	0	0	0	0	0	0	0	0	0				800;801			1	1	1	1.8	1.8	1.8	123.36	0	3.9498	24879000	7	1082	P19263
0	0	0	0	0	0	0	0	0	0	0	0	0	0	0	0	0	0	0	0	0	0	0	276950000	0	0	0	0	0	0	0				802;803;804;805			2	2	2	5.8	5.8	5.8	71.293	0.0056657	1.9753	2188300000	3	623	P19658
7548700	12395000	7444100	3944900	2373300	2981900	2686300	0	6085600	4253200	4477500	0	1673700	1426400	9404300	0	0	0	5515500	0	4727600	3307700	0	0	0	0	0	1822100	1295200	0	0				806;807;808	126	36	3	3	3	3.3	3.3	3.3	120.31	0	34.604	306950000	126	1081	P19659
0	0	0	0	0	0	0	0	0	0	0	0	0	0	0	0	0	0	0	0	0	0	0	0	0	0	480790	0	0	0	0	+			809;810	127		1	1	1	1.4	1.4	1.4	224.84	1	-2	12648000	1	1950	P19812
0	0	0	2939400	113990000	185210000	103790000	49999000	112590000	155750000	95990000	116260000	200510000	119380000	232180000	298300000	91828000	95210000	52299000	109170000	41690000	197820000	137120000	31367000	24995000	168700000	81475000	84547000	15067000	0	34552000				811;812;813;814;815;816;817;818;819;820;821;822;823;824;825		37	23	23	23	34.7	34.7	34.7	68.875	0	323.31	7447200000	1689	605	P20050
0	0	0	0	0	0	0	0	0	0	0	0	0	0	0	0	0	0	0	0	0	0	0	0	0	472310	0	0	0	0	0				826			1	1	1	4.5	4.5	4.5	25.414	0.0055866	1.8612	11073000	22	221	P20433
0	0	0	0	0	0	0	0	0	0	0	0	0	0	0	0	0	0	0	0	0	0	0	0	0	0	0	0	419770	0	0	+			827			2	2	2	12.1	12.1	12.1	25.079	1	-2	10017000	2	215	P20434
5514100	6357700	12012000	3865100	5594600	4143000	4716800	3394500	4734300	2433600	6604500	2059100	0	0	1621900	2335900	2289300	3865100	2693100	0	2052600	3981400	3199900	0	0	2507800	0	3668900	0	0	0				828;829		38	5	5	5	32.9	32.9	32.9	17.91	0	276.67	247660000	132	155	P20435
0	0	0	0	0	0	0	0	0	0	0	0	0	0	1911100	0	0	0	0	0	0	0	0	0	0	0	0	0	0	0	0				830			1	1	1	2.3	2.3	2.3	62.262	0.0079017	1.4953	7647000	4	528	P20457
0	0	0	0	0	0	0	0	0	0	0	0	0	0	0	0	0	0	0	0	0	0	0	0	0	0	0	0	2100300	0	0	+			831;832;833			1	1	1	2.8	2.8	2.8	63.803	1	-2	17702000	4	576	P21304
10913000	8043300	9410800	7566400	0	3513400	4029100	5456900	8811900	3794100	3764500	6140200	7449400	7905800	51771000	11420000	0	3527200	6394500	0	10156000	4126700	3357000	3680100	0	8481100	10369000	6495000	4220000	0	0				834;835;836;837;838;839;840	131;132;133		10	10	10	22.2	22.2	22.2	91.873	0	323.31	620680000	264	810	P21538
0	0	0	0	0	0	0	0	0	0	0	0	0	0	2213400	0	0	0	0	0	0	0	0	0	0	0	0	0	0	0	0	+			841			1	1	1	3	3	3	39.083	1	-2	14884000	7	335	P21560
0	0	0	0	16372000	12463000	11411000	15621000	44432000	55744000	46547000	36036000	55661000	21719000	83927000	31897000	18532000	9854800	18348000	15811000	3381400	19665000	29548000	5690800	0	14773000	5821100	4698800	2870300	0	0				842;843;844;845;846;847;848;849;850;851;852;853;854	134;135		17	17	17	44.3	44.3	44.3	35.683	0	227.56	1581000000	528	314	P21651
0	0	4974200	0	0	0	0	0	0	0	0	0	0	0	5395200	5301700	0	0	0	0	0	3412300	0	0	0	9223500	3638200	3624100	0	0	0				855;856			2	2	2	4.3	4.3	4.3	76.932	0	11.34	151410000	41	654	P21691
0	0	0	0	0	0	0	0	0	0	0	0	0	9836500	0	0	0	0	0	0	0	0	0	0	0	0	0	0	0	0	0				857			1	1	1	1.3	1.3	1.3	194.05	0	16.277	20599000	6	1703	P22082
18457000	16462000	8358700	25398000	45403000	43219000	46777000	40835000	12853000	23664000	35812000	19594000	15254000	8198100	0	16616000	38379000	35087000	28022000	0	23545000	18759000	23355000	34243000	17538000	21929000	18111000	15681000	30196000	28436000	8782200				858;859	136		15	15	15	56.5	56.5	56.5	40.73	0	323.31	1854900000	360	377	P22133
0	0	0	0	0	0	0	0	0	0	0	0	0	0	0	6944600	0	0	3191900	0	0	3032900	0	3631200	0	7592700	0	0	0	0	0				860			1	1	1	3.4	3.4	3.4	34.333	0	3.5416	125560000	83	296	P22134
0	1786400	0	0	0	0	0	0	0	0	0	0	0	0	0	0	0	0	0	0	0	0	0	0	0	0	0	0	0	0	0				861			2	2	2	3	3	3	135.74	0	5.3131	14509000	11	1203	P22138
14291000	5824000	3493200	0	3120600	2383600	0	0	3245200	0	0	0	0	0	0	0	0	0	0	0	0	0	0	0	0	0	0	0	0	0	0				862;863;864;865;866		39	4	4	4	20.4	20.4	20.4	43.06	0	102.44	230550000	126	382	P22148
0	0	0	0	0	0	0	0	0	0	0	0	0	0	0	0	0	0	0	0	0	0	0	0	0	0	0	0	0	0	0	+			562;563			6	1	1	13.9	3	3	69.65	1	-2	0	1	642	P22202
3485600	4239700	2206000	2620200	4140700	0	0	4454100	0	6855700	0	3854400	0	1347000	0	0	0	0	4717700	0	1938600	994300	0	2732000	0	819230	0	0	8846000	0	0				867;868;869;870			5	5	5	65	65	65	11.235	0	108.41	197110000	89	103	P22217
0	0	0	0	0	0	0	0	0	0	0	0	0	879940	0	0	0	0	0	0	0	0	0	0	0	0	0	0	0	0	0				871			1	1	1	1.4	1.4	1.4	129.46	0.0093537	1.3619	2674800	2	1149	P22276
0	0	0	0	0	0	0	0	0	0	0	6608900	0	3374600	6393500	43384000	12460000	18014000	30775000	42576000	15299000	18012000	29467000	33872000	9557400	36034000	23971000	26586000	17357000	0	17955000				872;873;874;875;876	138;139		5	5	5	13.4	13.4	13.4	70.347	0	129.05	1243200000	594	621	P22336
0	0	0	0	0	0	0	0	0	0	0	0	0	0	0	0	0	0	0	0	0	0	0	0	0	0	652200	0	0	0	0				877;878			2	2	2	3.6	3.6	3.6	174.84	0	2.6301	17307000	5	1536	P22579
15803000	15196000	0	37228000	0	0	15539000	16297000	0	0	0	0	18135000	0	0	0	0	0	17511000	0	0	0	0	7947100	0	0	0	11844000	31963000	0	0				879			6	6	6	42.4	42.4	42.4	19.404	0	19.799	1850400000	440	170	P22696
0	0	0	0	0	0	0	0	2884500	0	0	0	0	0	0	0	0	0	13932000	0	0	0	0	2029200	0	0	0	0	0	0	0				880;881;882;883	140		5	5	5	66.3	66.3	66.3	11.204	0	57.316	145420000	17	104	P22803
116270000	120790000	91036000	36185000	91816000	64976000	70816000	56425000	102730000	85236000	70514000	86983000	72570000	27753000	69634000	105390000	157400000	94012000	181740000	91780000	74457000	79101000	121730000	65012000	35496000	85786000	109260000	72190000	32471000	31197000	59607000				884;885;886;887;888;889;890;891;892;893;894;895;896;897	141		17	17	17	99.1	99.1	99.1	11.693	0	323.31	6862100000	3819	109	P22943
29703000	36380000	36890000	46120000	27082000	24382000	18186000	35297000	28806000	21640000	24223000	33412000	33123000	88159000	60279000	24779000	14882000	21433000	37936000	21895000	30350000	17686000	20853000	27969000	74460000	25736000	22739000	19407000	18247000	0	20699000				898;899;900;901;902;903;904;905;906;907			20	20	11	52.5	52.5	21.6	28.812	0	307.91	2568800000	701	255	P23248
104230000	82706000	134330000	60900000	106020000	104670000	80197000	113940000	147240000	98717000	83891000	63467000	102040000	51055000	112810000	125190000	141930000	123280000	141340000	124690000	116940000	115330000	100700000	109060000	72576000	126370000	122870000	115130000	82938000	84623000	112330000				908;909;910;911;912;913;914;915	144;145;146;147;148	200;40	18	18	18	90.4	90.4	90.4	17.114	0	323.31	8041700000	2471	157	P23301;P19211
6176200	10378000	5753700	6995800	4866200	6720000	4359500	0	4573300	4959600	3673000	12377000	0	0	0	9692900	8229400	3219700	7102300	4410000	3979400	4976800	5294800	2476400	3441300	10522000	11716000	3559500	11801000	0	2719600				916	149		8	6	6	16.4	11.6	11.6	80.509	0	21.24	470210000	185	708	P23337
0	0	0	0	0	0	0	0	0	0	0	0	0	0	851990	0	0	0	0	0	0	0	0	0	0	0	0	0	0	0	0				917			1	1	1	3.8	3.8	3.8	36.934	0	5.2461	17488000	17	339	P23493
2429700	0	2500400	2908200	0	1758200	0	3670500	0	0	0	3696200	0	1007000	4596400	0	0	0	6331100	0	0	0	0	3030400	8180600	8461100	2442400	0	2170900	0	0				229;230;231;232;233;235;236;237;918;919	150		13	3	3	68.4	14.8	14.8	17.547	0	31.293	189450000	76	155	P24000
0	0	2206300	0	0	0	0	0	0	0	0	0	0	1082900	0	0	0	0	0	0	0	0	0	0	0	0	0	0	0	0	0				920	152		3	3	3	3	3	3	130.01	0	10.494	20203000	9	1145	P24384
0	0	0	0	0	1577300	0	0	3889100	4147500	1535400	2258100	0	0	0	4288000	2723000	2009500	2949000	2483200	2643100	1579300	4382600	3844200	0	5170600	4767400	2941800	3098600	0	0				921;922;923			5	5	5	16.3	16.3	16.3	56.849	0	91.765	165530000	157	497	P24719
0	0	0	0	0	0	0	0	0	0	0	0	0	0	0	0	0	0	738730	0	0	0	0	0	0	0	0	0	0	0	0				924;925;926;927;928			2	2	2	2.9	2.9	2.9	138.4	0	3.2814	53926000	2	1226	P25357
0	0	0	0	0	0	0	0	0	0	0	0	0	0	0	0	0	0	0	0	0	0	0	0	0	0	0	4092900	0	0	0				929		41	2	2	2	6	6	6	63.646	0.0079929	1.5647	794070000	151	564	P25364
0	0	0	0	0	0	0	0	0	0	0	0	0	7544900	0	0	0	0	0	0	0	0	0	0	0	0	0	0	0	0	0				930			2	2	2	10.6	10.6	10.6	42.579	0	19.586	61889000	7	405	P25367
0	0	0	0	0	0	0	0	0	0	0	0	0	0	0	0	0	0	0	0	0	0	0	0	0	371090	0	0	0	0	0				931	155		1	1	1	10	10	10	12.38	0.002008	2.4451	37981000	8	110	P25373
32682000	29854000	62374000	92114000	63912000	163770000	108110000	34129000	61157000	54245000	88043000	28211000	49815000	40610000	159880000	126650000	53036000	86075000	164820000	132050000	69698000	114130000	73331000	33273000	77141000	141620000	109230000	186750000	46022000	0	94497000				932;933;934;935		201;202;42;43;44;45;46	9	9	9	28.7	28.7	28.7	46.667	0	118.21	7458900000	1514	422	P25441
0	0	0	0	0	0	0	0	0	0	0	0	0	5031100	0	0	0	0	0	0	0	0	0	0	0	0	0	0	0	0	0				936;937;938			11	11	11	78.7	78.7	78.7	27.449	0	14.344	39191000	27	254	P25443
0	0	0	0	1414600	1701600	0	863660	3699900	0	0	3905000	6571800	7318600	15223000	238810000	7283900	0	48119000	0	19235000	0	0	53891000	0	178410000	8913900	0	28099000	6979700	0				939;940;941;942;943;944			7	7	7	28.7	28.7	28.7	36.612	0	35.577	1879800000	130	334	P25453
0	0	0	0	0	0	0	0	0	0	0	0	0	0	0	0	0	0	0	0	0	0	0	0	0	0	0	0	244190	0	0				945			1	1	1	3	3	3	42.963	0	3.882	3899900	6	400	P25454
0	0	0	0	0	0	0	0	0	0	0	0	0	0	0	0	0	0	0	0	0	0	0	0	0	0	0	650900	0	0	0				946			1	1	1	1.1	1.1	1.1	111.41	0	3.421	7403600	2	979	P25502
0	0	0	0	0	0	0	0	0	0	0	0	0	0	0	0	0	0	0	0	0	0	0	0	0	0	0	33075000	0	0	0	+			947;948		268	1	1	1	1.6	1.6	1.6	84.516	1	-2	384470000	6	745	P25569
0	0	0	0	0	0	0	0	0	0	0	0	0	0	0	0	0	0	0	0	0	0	0	281520	0	0	0	0	0	0	0				949			1	1	1	4.1	4.1	4.1	64.791	0.0019589	2.2708	2231000	2	583	P25579
0	0	0	0	0	0	0	0	0	0	0	0	0	5095900	0	0	0	0	0	0	0	0	0	0	0	0	0	0	0	0	0	+			950			3	3	3	5.7	5.7	5.7	124.32	1	-2	11863000	2	1096	P25588
0	0	1506400	570400	0	0	0	0	0	0	0	0	0	0	0	0	0	0	0	0	0	0	0	0	0	1556100	0	0	0	0	0				951			2	2	2	2	2	2	95.689	0	4.5905	25016000	5	832	P25611
0	0	0	0	0	0	0	0	0	0	0	0	0	1914200	0	0	0	0	0	0	0	0	0	0	0	0	0	0	0	0	0				952			4	4	4	16.6	16.6	16.6	33.593	0	17.047	39281000	18	290	P25617
6052900	7796000	7481000	6003000	13189000	9192200	6942100	8955900	8424800	6991200	7358300	8246600	7842600	5270100	13803000	3208500	5632600	4236500	3174600	0	5131700	5421000	0	2222500	0	5071800	0	2453300	1968200	0	2822500				953;954;955			5	5	5	26.3	26.3	26.3	21.751	0	68.126	442460000	206	190	P25651
0	14936000	13461000	3363800	5386600	8494500	6088200	2281500	0	6065000	4567200	0	0	0	7904400	0	0	7876300	3288200	0	0	0	0	4258400	7638000	13933000	0	21296000	13791000	0	10978000				956;957	163		3	3	3	4.4	4.4	4.4	91.995	0	100.2	593780000	145	835	P25694
6676400	5157900	8364200	10927000	8433900	7970900	12076000	6448200	14147000	13023000	18712000	5531400	5489800	6821700	16662000	15741000	11213000	18934000	16015000	10742000	25121000	15901000	26263000	8517200	32993000	19710000	12181000	14903000	6306100	0	23190000				958;959;960;961			11	11	11	52.2	52.2	52.2	33.714	0	37.016	998530000	515	297	P26321
0	0	0	0	0	0	0	0	0	0	0	0	0	823200	0	0	0	0	0	0	0	0	0	0	0	0	0	0	0	0	0				962			2	2	2	14.1	14.1	14.1	30.166	0.0057526	2.0884	11384000	4	269	P26343
0	0	0	0	0	0	0	0	0	0	0	0	0	0	0	0	0	0	0	0	0	0	0	0	0	0	0	0	0	0	14495000				963;964;965;966;967;968		48	1	1	1	1.5	1.5	1.5	124.14	0.0079717	1.5581	231210000	11	1090	P26637
0	0	0	1130500	0	0	0	0	0	0	0	0	0	0	8459400	0	0	0	2385300	0	0	0	0	0	0	1714400	0	0	0	0	0				969;970			6	6	6	33.3	33.3	33.3	25.038	0	36.726	74498000	22	225	P26783
3536500	2385100	0	980720	3618300	652050	2454100	2038800	2366000	0	932800	1974200	614650	0	2463200	2117900	2435200	2044000	1786100	1313600	2558700	0	0	0	621120	2725900	3081100	2096200	0	0	1546300				971;972;973;974;975;976;977			8	4	4	34.2	20.1	20.1	22.201	0	9.6853	136560000	123	199	P26784
17111000	16592000	17698000	15022000	14898000	16385000	13906000	14140000	13906000	13483000	11530000	16139000	11085000	10282000	8844500	6659400	21777000	24148000	10022000	13326000	11520000	22296000	19447000	9952900	13206000	12889000	20448000	14151000	9074700	0	13936000				977;978;979;980;981;982;983;984;985;986			12	12	8	46.5	46.5	39.9	22.249	0	52.013	1158100000	486	198	P26785
19425000	18073000	16810000	10279000	15509000	14657000	14072000	9661600	21912000	12662000	13617000	13258000	11722000	19421000	24456000	20660000	15904000	15488000	23914000	18199000	20717000	20106000	21680000	16019000	23558000	27590000	18528000	16507000	12242000	0	10344000				987;988;989;990;991;992;993;994;995;996;997;998			22	22	10	61.6	61.6	37.9	21.622	0	56.561	1355500000	447	190	P26786
5436300	7431700	8268000	4211200	9469200	28542000	5662700	4056000	5990400	7818200	5651700	8924100	0	6962200	0	3892300	2467400	4233000	4982300	0	2924500	3173900	4641600	3134800	0	1959500	2821800	2298800	4157000	0	0				1000;999			4	4	4	16.3	16.3	16.3	34.603	0	91.133	412480000	98	306	P27616
0	0	0	0	0	0	0	0	0	0	0	0	0	2695400	0	0	0	0	0	0	0	0	0	0	0	0	0	0	0	0	0				1001;1002			3	3	3	8	8	8	115.65	0	121.27	96751000	58	1063	P27692
1393900	2676100	0	0	0	2262100	0	0	0	0	0	1909700	1431100	0	2157000	0	0	0	1566500	1132600	0	3036300	0	1313100	0	2185300	2690000	0	602470	0	0				1003			2	2	2	13.4	13.4	13.4	16.151	0	5.9017	95959000	39	142	P28000
0	0	0	0	0	0	0	0	0	0	0	0	0	523730	0	0	0	0	0	0	0	0	0	0	0	0	0	0	0	0	0				1004			1	1	1	5.1	5.1	5.1	47.068	0	3.0702	20244000	3	413	P28003
42004000	52714000	76769000	36109000	28889000	34856000	19600000	26699000	41467000	39765000	19630000	29112000	28248000	20973000	104670000	88010000	22037000	44793000	66758000	45629000	52148000	74843000	71840000	33345000	0	50772000	21277000	47140000	21784000	36303000	21989000				1005;1006;1007;1008;1009;1010;1011	166;167		11	11	11	20.3	20.3	20.3	42.482	0	232.76	3347800000	1170	379	P28004
0	0	0	0	0	0	0	0	0	0	0	0	0	0	0	0	0	0	0	0	0	0	0	0	0	0	0	517930	0	0	0	+			1012			1	1	1	3.9	3.9	3.9	21.48	1	-2	41634000	4	205	P28007
0	0	0	0	11454000	6206700	6947800	0	7018500	10114000	5974300	0	0	5825100	4409500	0	0	0	0	0	0	5340500	0	0	0	0	3070600	0	0	0	0				1013;1014;1015	168;169;170;171		14	14	14	39	39	39	62.408	0	34.752	257950000	87	557	P28240
0	0	0	0	0	0	0	2476600	0	0	0	2284700	0	0	4407500	0	0	0	8576300	0	0	2161000	0	4751300	0	3917300	0	0	2846800	0	0				1016;1017			2	2	2	12.5	12.5	12.5	24.081	0	5.8817	186300000	123	216	P28707
1545100	1823900	4775800	3816700	1080900	1027100	0	2247700	1168300	1441400	1358400	3792300	2400400	2303500	0	0	0	0	1267500	0	0	0	0	0	0	0	0	0	0	0	0				1018;1019;1020;1021			6	6	6	13.1	13.1	13.1	66.906	0	70.921	118290000	37	596	P29056
0	0	0	0	0	0	0	0	0	0	0	0	0	0	0	0	0	0	0	0	0	0	0	0	0	0	0	0	0	0	0	+			1022;1023			7	1	1	39.3	4.9	4.9	30.091	1	-2	0	1	267	P29311
0	0	0	0	0	0	0	0	0	0	0	0	0	0	0	0	3578800	3054900	0	0	0	0	0	0	0	0	0	8969300	0	0	0				1024			2	2	2	12.9	12.9	12.9	31.636	0	28.151	197470000	134	287	P30656
0	0	0	0	0	0	0	0	0	0	0	0	0	0	416940	0	0	0	0	0	0	0	0	0	0	0	0	0	0	0	0	+			1025			2	2	2	5.7	5.7	5.7	19.809	1	-2	4202100	2	174	P30902
1847900	3046400	6531000	10000000	15898000	20718000	34824000	9495800	17230000	23713000	26113000	42837000	24698000	104910000	2782100	19799000	22932000	40332000	3465200	7867700	28454000	75993000	42311000	8826500	24360000	17402000	28587000	45993000	14086000	0	12114000				1026;1027;1028;1029			9	9	8	26	26	24	62.79	0	323.31	1775900000	571	554	P30952
0	0	0	0	0	0	0	0	1567200	1393900	0	8651200	13499000	4820100	5648900	312950000	59761000	62575000	34378000	107110000	38596000	143330000	163330000	44599000	9730600	318420000	106890000	140210000	16136000	0	31529000				1030;1031;1032;1033;1034;1035;1036;1037;1038;1039;1040;1041;1042;1043;1044;1045;1046;1047;1048;1049;1050;1051;1052	173	49;50;51;52	26	26	26	30.2	30.2	30.2	100.03	0	323.31	3313000000	578	875	P31111
3055300	3239300	3916000	0	0	0	0	0	2803300	2484700	2225300	0	0	0	2005500	2858300	0	2130600	0	0	0	0	0	0	0	2624000	0	0	0	0	0				1053;1054		204;53;54	4	4	4	7.8	7.8	7.8	91.429	0	13.131	84309000	25	790	P31244
107480000	70065000	65572000	21739000	34262000	25322000	29423000	21116000	32558000	33277000	26609000	19294000	24605000	47001000	96259000	42995000	39491000	33194000	17762000	36624000	26057000	47440000	33240000	15287000	12311000	46223000	52717000	61785000	9308700	11292000	32390000				1055;1056;1057;1058			8	8	8	11	11	11	72.514	0	182.71	2927600000	883	625	P31376
4606300	3430700	3424100	2231700	2562900	2026500	0	2118900	3795400	0	0	2515800	3395400	2541400	5091100	3783700	3251800	0	6076000	3562500	3345400	0	0	2431000	0	4612300	0	0	2800700	0	0				1059;1060;1061;1062			7	7	7	17.5	17.5	17.5	45.576	0	49.169	206390000	142	399	P31378
0	2330100	5628400	2695900	0	0	0	0	1926700	1527300	2079300	0	1889000	0	2296400	0	0	0	4918200	0	0	0	0	2682500	0	0	0	0	2540000	0	0				1063;1064;1065;1066;1067;1068;1069			6	6	6	17.8	17.8	17.8	46.977	0	43.131	152090000	80	405	P31385
0	0	0	0	0	0	0	0	0	0	0	929300	0	0	0	0	0	0	3499500	0	0	0	0	960570	0	0	0	0	982960	0	0				1070;1071;1072			2	2	2	40.2	40.2	40.2	10.061	0	8.0521	32639000	9	87	P31787
0	0	0	0	0	0	0	0	0	0	0	0	0	0	0	0	0	0	0	0	0	0	0	0	0	0	0	4860700	0	0	0				1073			1	1	1	0.8	0.8	0.8	79.823	0.0019724	2.3189	52179000	0	709	P32190
0	0	0	0	0	0	0	0	0	0	0	0	0	0	0	0	0	0	118770	0	0	0	0	0	0	0	0	0	0	0	0	+			1074			1	1	1	5.4	5.4	5.4	47.162	1	-2	1350700	1	428	P32264
8708900	12993000	11336000	9027300	11708000	11203000	16100000	9480000	9491200	10522000	7177300	9609100	5809900	48222000	21611000	12341000	13570000	12303000	6209000	0	8815300	8559900	11133000	9251800	14200000	11278000	17438000	9634000	6367100	0	22684000				1075;1076	181		10	10	10	17.5	17.5	17.5	93.288	0	54.715	991980000	569	842	P32324
0	0	0	0	0	0	0	0	0	0	0	0	0	0	0	0	0	0	0	0	0	0	0	0	0	1027300	0	0	0	0	0	+			1077			1	1	1	1.8	1.8	1.8	80.689	1	-2	1888900	1	704	P32325
0	1062400	0	0	1177100	5534600	1706600	0	6653900	1596200	16287000	1084300	0	9475900	19428000	10612000	2902000	2856000	3773300	0	8478700	7626400	0	3143300	0	12415000	12116000	10401000	3110400	0	0				1078;1079;1080	183		5	5	5	3.7	3.7	3.7	209.97	0	107.98	396910000	105	1867	P32333
0	0	0	0	0	14610000	0	0	0	0	0	0	0	0	0	0	0	0	6415300	0	0	0	0	0	0	0	0	0	0	0	0				1081;1082			2	2	2	2.9	2.9	2.9	74.016	0	9.5678	267820000	69	654	P32349
0	0	0	0	0	0	0	0	0	0	0	0	0	0	0	0	0	0	0	0	0	0	0	0	0	0	0	0	7799800	0	0				1083;1084	184		1	1	1	9.5	9.5	9.5	39.07	0	26.933	197810000	38	346	P32351
0	0	0	0	0	0	0	0	0	0	0	0	0	0	0	0	0	0	0	0	0	0	0	0	0	0	0	8473900	0	0	0				1085;1086		271;55;56;57	1	1	1	2.8	2.8	2.8	126.97	0.0071301	1.5862	66995000	2	1115	P32361
0	0	0	0	0	0	0	0	0	0	0	0	0	0	0	0	0	0	0	0	0	0	0	250120	0	0	0	0	0	0	0				1087;1088			2	2	2	9.6	9.6	9.6	28.861	0	6.9711	2622800	2	249	P32385
0	0	0	0	0	0	0	0	0	0	0	0	0	2924300	0	0	0	0	0	0	0	0	0	0	0	0	0	0	0	0	0				1089;1090;1091	187		3	3	3	5.4	5.4	5.4	74.372	0	4.4554	10330000	5	672	P32389
0	0	0	0	0	0	0	0	356110	0	0	0	0	0	0	0	0	0	0	0	0	0	0	0	0	0	0	0	0	0	0	+			1092			1	1	1	11.1	11.1	11.1	15.386	1	-2	7661100	4	135	P32445
3462900	10998000	16584000	11523000	21942000	48589000	24625000	33074000	15251000	18821000	15199000	24458000	18018000	12709000	43458000	18749000	17494000	3187100	16137000	0	5646300	6916300	13307000	16252000	0	19042000	19206000	8830900	15867000	6005200	0				1093;1094;1095;1096;1097;1098;1099;1100;1101;1102;1103;1104;1105;1106	188		26	26	26	32.4	32.4	32.4	59.347	0	176.59	1312200000	503	525	P32448
100540000	199240000	107530000	165420000	62731000	40482000	62689000	168400000	59373000	52685000	84917000	136160000	10663000	37131000	92022000	138830000	50219000	90699000	204550000	35389000	112210000	100450000	89056000	107670000	141200000	145030000	83129000	158110000	88713000	18113000	32214000				1107;1108;1109;1110;1111;1112;1113;1114	189;190	58;59	18	18	18	20.8	20.8	20.8	60.054	0	323.31	10603000000	2189	520	P32457
12620000	0	10692000	18445000	0	7292700	14081000	10625000	12499000	14750000	25568000	20188000	11440000	9532400	19169000	21047000	11581000	21084000	19360000	0	14868000	12977000	0	9701600	14250000	15054000	5760900	16127000	12621000	0	0				1115;1116;1117;1118			9	9	9	52.4	52.4	52.4	22.627	0	68.193	841970000	116	206	P32471
24222000	15148000	22454000	13263000	38049000	16784000	10552000	15818000	16109000	15119000	0	30072000	19017000	11816000	2599700	0	5584200	0	0	0	0	3034900	0	0	0	3505600	16600000	0	0	0	0				1119;1120;1121	191		4	4	4	6.1	6.1	6.1	98.444	0	101.91	797530000	275	875	P32480
0	0	0	0	0	0	0	0	0	0	0	0	0	1065800	0	0	0	0	0	0	0	0	0	0	0	0	0	0	0	0	0				1122;1123			2	2	2	4.4	4.4	4.4	79.281	0.0019743	2.3248	17944000	3	702	P32494
0	0	0	0	0	0	0	0	0	0	0	0	0	0	0	0	0	0	1310500	0	0	0	0	0	0	0	0	0	0	0	0				1124;1125			3	3	3	5.4	5.4	5.4	77.88	0	4.4349	19525000	4	720	P32499
0	0	3711900	0	0	0	0	0	0	0	0	0	0	0	0	0	0	0	0	0	0	0	0	0	0	0	0	0	0	0	0				1126;1127			3	3	3	5.8	5.8	5.8	111.92	0	9.5542	55941000	25	956	P32504
0	1638900	5329300	2695100	0	0	0	0	0	0	0	0	0	0	1057800	0	0	0	0	0	0	0	0	1029500	0	0	0	0	0	0	0				1128;1129;1130			5	5	5	40	40	40	13.66	0	9.1052	44272000	36	125	P32529
3616600	4750600	5482600	3454700	2363800	2129700	2210500	3447000	2940100	2287600	4330900	2482000	0	2520800	3975600	5146500	1993500	2782300	5174600	0	4008100	2950200	0	1776300	4023800	2466600	3138500	2802800	2119200	0	2796200				1131;1132			6	6	6	8.7	8.7	8.7	57.079	0	42.015	247570000	110	505	P32566
0	0	0	0	0	0	0	0	0	0	0	0	0	0	0	0	0	110440000	0	0	0	0	0	0	0	0	0	0	0	0	0				1133;1134			1	1	1	3.9	3.9	3.9	56.021	0.0094421	1.392	172080000	2	507	P32582
0	11160000	8693100	9677100	0	0	0	3033900	0	0	0	7035300	7996700	0	8501100	7919000	4343000	0	2487000	0	0	8362700	0	2811900	0	7864700	4267700	0	3105900	0	0				1135;1136;1137			5	5	5	7.1	7.1	7.1	41.015	0	4.2927	339620000	39	406	P32583
0	0	0	0	0	0	0	0	0	0	0	0	0	0	0	0	0	0	0	0	0	0	0	0	0	0	389370	0	0	0	0				1138	192		3	3	2	7.4	7.4	4.6	77.62	0	21.009	29823000	38	693	P32590
6293300	3714900	5018400	3207000	5245800	3975900	6816100	952720	7943600	4898400	6016700	0	5525200	0	4508400	4771800	6896500	6949600	0	6570100	3855400	5623900	5738100	0	0	6069700	4247500	9100200	615540	0	0				1139;1140		60	3	3	3	5.6	5.6	5.6	92.925	0	12.244	298860000	85	825	P32591
6689000	7172100	4385300	4680400	6010300	3892900	3937800	0	6555400	10337000	1134700	0	5539400	0	4738000	15417000	0	0	0	4883600	0	0	0	0	0	10429000	0	9175300	3421000	0	0				1141;1142;1143;1144;1145		61	9	9	9	7.5	7.5	7.5	156.74	0	65.318	340040000	127	1359	P32597
0	0	0	0	0	0	0	0	0	0	0	0	0	0	0	1411300	0	0	0	0	2067700	0	2203100	0	0	0	1829300	0	0	0	0				1146			3	3	3	14.1	14.1	14.1	35.907	0	3.1194	43818000	12	312	P32598
0	0	0	0	0	0	0	0	0	0	0	0	0	0	0	0	0	0	0	0	0	0	0	0	0	0	0	3989000	0	0	0				1147			2	2	2	6.8	6.8	6.8	56.821	0.0078125	1.45	58350000	8	518	P32621
0	0	0	0	0	0	0	0	0	0	0	0	0	137490	0	0	0	0	0	0	0	0	0	0	0	0	0	0	0	0	0	+			1148;1149		272	1	1	1	0.8	0.8	0.8	246.18	1	-2	490960	0	2163	P32639
0	0	0	0	0	0	0	0	0	0	0	0	0	0	0	0	0	0	0	0	0	0	0	0	0	6357600	0	0	0	0	0				1150;1151;1152;1153		205	4	4	4	3.3	3.3	3.3	168.24	0.002006	2.4415	98171000	5	1468	P32657
0	0	0	0	0	0	0	0	0	0	0	0	0	0	0	0	0	0	0	0	0	0	0	0	0	0	0	1154000	0	0	0				1154			2	2	2	4.9	4.9	4.9	41.042	0.0056604	1.9731	167830000	2	386	P32771
310510000	227440000	312930000	95707000	122550000	88636000	95864000	49889000	149010000	127350000	113990000	52383000	55829000	41865000	180230000	130270000	73300000	85531000	92121000	13505000	97341000	134180000	72579000	36484000	13782000	112780000	70214000	147530000	30362000	0	17861000				1155;1156;1157			11	11	11	23.8	23.8	23.8	32.201	0	323.31	8323400000	687	286	P32773
6170700	10418000	7443200	5616200	6098800	6783200	3080300	2247400	3789000	5301800	4818000	6892100	10730000	0	0	3640600	6118900	0	14419000	3331300	3046200	17609000	5268400	12637000	2329100	6885300	5678200	5394600	4840700	0	4344300				1158			10	10	10	40.5	40.5	40.5	33.994	0	48.404	734900000	162	299	P32805
1536500	0	0	0	0	0	0	0	0	0	0	0	0	0	4233100	1296900	0	0	1526800	0	0	0	0	0	0	0	0	0	0	0	0				1159;1160			3	3	3	4.8	4.8	4.8	49.65	0	4.1832	67925000	22	435	P32832
1863800	0	3317700	0	0	1897000	0	0	0	0	0	0	0	0	4796100	0	0	0	0	0	0	0	0	0	0	0	0	0	0	0	0				1161;1162			3	3	3	2.3	2.3	2.3	71.237	0	7.8039	51049000	20	620	P32833
0	0	0	0	0	0	0	0	0	0	0	527300	0	0	0	0	0	0	1193300	0	0	0	0	0	0	0	0	679060	0	0	537380				1163;1164;1165;1166			6	6	6	31.1	31.1	31.1	24.81	0	9.5644	21966000	19	219	P32835;P32836
0	0	0	0	0	0	0	0	0	0	0	0	0	0	0	0	0	0	0	0	0	0	0	0	0	0	0	0	0	0	0				1167			1	1	1	2.6	2.6	2.6	48.706	0.0064279	1.7722	0	3	428	P32841
0	0	0	0	0	0	0	2249000	0	0	0	0	0	1913300	0	0	0	0	7450700	0	0	0	0	0	0	0	0	0	0	0	0				1168;1169;1170			2	2	2	2.6	2.6	2.6	134	0	101.57	53378000	27	1169	P32849
0	0	0	0	0	0	0	0	0	0	0	0	0	0	4072400	6887100	0	0	1940200	0	0	0	0	0	0	0	0	0	0	0	0				1171			2	2	2	2.4	2.4	2.4	84.842	0.006422	1.7704	119430000	6	752	P32892
0	0	0	0	0	8178200	0	0	0	8366900	0	0	0	0	0	16968000	6375300	0	0	0	10431000	16455000	10702000	0	0	10847000	0	0	0	0	0				1172;1173;1174;1175		62;63	3	3	3	3.2	3.2	3.2	103.94	0	12.031	834660000	58	925	P32896
0	0	0	0	2949400	3323500	1546800	1099100	3652700	3969900	0	6173100	12010000	7281600	9528000	27459000	5609200	4308100	970740	8466500	4280100	21114000	16199000	7763400	2414400	36336000	24965000	14794000	10413000	10160000	15106000				1176;1177;1178;1179;1180;1181;1182;1183;1184;1185;1186;1187;1188;1189;1190;1191	197		21	21	21	17.6	17.6	17.6	141.28	0	91.104	611910000	282	1225	P32908
0	0	0	0	0	0	0	0	0	0	0	0	0	1610200	0	0	0	0	0	0	0	0	0	0	0	0	0	0	0	0	0				1192;1193;1194			2	2	2	27.8	27.8	27.8	12.312	0	3.2795	5593300	1	108	P32911
271910000	566120000	214510000	440020000	82201000	149400000	24458000	43758000	18780000	9231000	6205000	5912900	720320	18188000	49098000	0	1288100	0	7319100	0	2944000	9073100	0	1900500	0	0	0	773220	0	0	0				1195;1196;1197;1198;1199;1200	198	206;207;64;65;66;67;68;69	19	19	19	48.1	48.1	48.1	32.689	0	323.31	6295600000	950	291	P33122
0	0	0	0	0	0	0	0	0	0	0	0	0	0	0	0	0	0	0	0	0	0	0	0	0	0	0	0	0	0	528770				1201			2	2	2	14.8	14.8	14.8	27.058	0.0094259	1.3855	5957300	2	236	P33201
0	0	0	0	0	0	0	0	0	0	0	0	0	11200000	0	0	0	0	0	0	0	0	0	0	0	0	0	0	0	0	0	+			1202;1203;1204			2	2	2	2.7	2.7	2.7	167.84	1	-2	26031000	2	1483	P33202
0	0	0	0	0	0	0	0	0	0	0	0	0	150570	0	0	0	0	0	0	0	0	0	0	0	0	0	0	0	0	0				1205			2	2	2	6.1	6.1	6.1	47.893	0	3.3328	16017000	2	428	P33298
0	0	0	0	0	0	0	0	0	0	0	0	0	0	0	0	0	0	0	0	0	0	0	0	0	0	0	2782900	0	0	0				1206	200	208	1	1	1	1.5	1.5	1.5	109.35	0.0079787	1.5612	14485000	3	960	P33307
58493000	33570000	20994000	21941000	12160000	9849200	2838500	5562400	6014500	10121000	4897400	8453600	0	4303000	9875500	5058800	9261900	5767100	7346000	0	0	9119800	4995100	3591800	0	7891900	7327600	5201700	11366000	0	0				1207;1208		209	6	6	6	8.3	8.3	8.3	54.704	0	116.55	805800000	149	483	P33322
0	0	0	0	0	0	0	0	0	0	0	0	0	0	0	0	0	0	0	0	0	0	0	0	0	0	0	0	29652000	0	0				1209;1210;1211		210;70	1	1	1	2.3	2.3	2.3	124.33	0	4.26	453400000	4	1092	P33327
0	0	1311600	0	0	0	0	1241100	1519600	0	0	0	0	0	3892300	0	0	1805500	1670100	0	0	0	0	0	0	0	2238200	2378500	0	0	0				1212	201;202;203;204		6	6	6	10.6	10.6	10.6	67.855	0	22.252	87860000	34	597	P33417
24850000	37788000	33364000	44333000	22565000	22117000	14221000	29880000	23704000	17594000	18107000	31496000	17788000	44808000	34736000	18030000	16789000	13657000	30949000	18030000	21202000	13237000	15430000	22239000	84282000	26656000	19969000	21268000	18303000	12897000	23922000				1213;1214;1215;1216;1217;1218;898;900			18	9	9	52.2	23.9	23.9	28.743	0	97.336	2193500000	618	255	P33442
4298500	4525900	7051300	2523600	5426500	4764900	6578800	0	6107100	3731100	7587000	2018700	6969600	5394100	11880000	15706000	4381500	7776500	5435400	7915800	7993800	9100200	9595800	2386600	2985300	20155000	10886000	13752000	3590400	0	7608800				1219			3	3	3	3.3	3.3	3.3	132.11	0	33.77	465330000	291	1160	P34111
0	0	0	0	0	0	0	0	0	0	0	0	0	0	0	0	0	0	0	0	0	0	0	8452600	0	0	0	0	0	0	0				1220;1221;1222			4	4	4	6.8	6.8	6.8	150.78	0	17.444	58187000	15	1381	P34216
0	0	0	0	0	0	0	0	0	0	0	0	0	0	24559000	0	0	0	0	0	0	0	0	0	0	0	0	0	0	0	0				1223		211;212;73	1	1	1	1.9	1.9	1.9	77.066	0.0057582	2.0967	116390000	1	696	P34226
0	0	0	0	0	0	0	0	0	0	0	0	0	4468800	0	0	0	0	0	0	0	0	0	0	0	0	0	0	0	0	0				1224;1225			4	4	4	16.1	16.1	16.1	29.495	0	21.575	153410000	131	261	P34227
15060000	13946000	21824000	3581000	19326000	21565000	17257000	4047100	36030000	26183000	17976000	3812300	24542000	9713200	30548000	69250000	33886000	33382000	6930100	25951000	34549000	29375000	22229000	3644500	7611300	49352000	38657000	45353000	3657100	0	7617300				1226;1227;1228;1229;1230	205;206	74	9	9	9	12.2	12.2	12.2	127.99	0	323.31	1680600000	771	1148	P34228
0	1822500	3120200	741370	0	1530600	1738400	0	0	0	1845900	0	0	0	889220	0	2657700	2419100	0	0	3129100	0	3890700	1403300	0	0	0	0	1474000	0	0				1022;1023;1231			7	7	1	39.6	39.6	5.9	31.061	0	11.085	151340000	78	273	P34730
24659000	28036000	22715000	20436000	24617000	22832000	22442000	20350000	24688000	29298000	27071000	30095000	17628000	13033000	22962000	33318000	40642000	24670000	46030000	15523000	43202000	43557000	33237000	38795000	19048000	36942000	32641000	27582000	36478000	34314000	33505000				1232;1233;1234;1235;1236			13	13	13	68.9	68.9	68.9	21.589	0	323.31	2525100000	952	196	P34760
0	0	7523700	1360700	3934800	0	0	3733700	5780300	0	0	2428500	0	0	0	0	0	0	2022800	0	7393600	1461200	0	1348200	0	0	0	0	1913300	0	0				1237;1238;1239	208;209		5	5	5	42.7	42.7	42.7	25.326	0	121.68	281910000	116	225	P35176
3952100	1475500	4430200	624790	2167000	0	0	0	2343500	1576900	2227900	0	0	0	0	0	0	0	0	0	0	0	0	0	0	0	0	1241100	0	0	0				1240;1241			3	3	3	4.6	4.6	4.6	152.62	0	41.419	122690000	50	1332	P35177
0	0	0	0	0	0	0	0	0	2973800	0	0	0	0	2578100	12072000	9340000	12255000	3557600	10182000	12928000	8711100	13520000	12033000	0	15612000	14715000	12548000	8620300	0	0				1242;1243;1244;1245;1246;1247			9	9	9	8.6	8.6	8.6	163.84	0	323.31	472190000	195	1447	P35187
21427000	37447000	0	23966000	0	0	17772000	23927000	31623000	0	16459000	17635000	0	9554000	61073000	13882000	0	0	20586000	16751000	0	0	13394000	7880900	23849000	0	0	0	5820700	0	21549000				1248;1249;1250			2	2	2	11.9	11.9	11.9	27.44	0	87.218	1785000000	281	244	P35189
0	0	0	0	0	0	0	0	0	0	0	0	0	2403300	0	0	0	0	0	0	0	0	0	0	0	0	0	0	0	0	0				1251			2	2	2	5.1	5.1	5.1	62.472	0	3.1954	19805000	5	549	P35201
3514000	0	4244200	3185000	0	2308800	2596600	3849500	2464300	0	0	3384100	2859700	2390800	3062800	2614400	3597700	0	6302300	0	0	0	4953600	2147100	0	3365900	0	3917800	3220000	0	0				1252;1253;1254			5	5	5	13.8	13.8	13.8	18.741	0	10.477	221900000	138	167	P35691
330800000	282270000	301390000	176290000	336830000	398970000	286600000	188610000	420040000	478340000	365980000	281300000	499600000	33766000	430760000	585210000	488160000	440160000	214350000	608060000	365790000	606990000	721380000	317180000	616740000	617960000	1053700000	670420000	633830000	0	804460000				1255;1256;1257;1258;1259;1260			7	7	7	33.3	33.3	33.3	25.097	0	63.949	32283000000	1082	219	P35719
2522500	0	0	6108000	0	0	0	1619800	3114800	2311100	2254600	1751900	2422800	1566500	9487600	2750100	0	0	2272900	0	2773300	0	0	3692700	8235100	4413300	0	3377600	5920800	0	1765900				1261;1262;1263			3	3	3	8.7	8.7	8.7	83.972	0	288.04	210860000	129	738	P35732
10606000	8639800	7034100	2431300	3465000	4859100	3796000	2378800	6640300	5206800	8000800	2505500	2442500	0	2954900	6717200	0	4947300	6475500	0	4139800	0	4278700	2720100	0	8224200	6699500	10469000	0	0	2937900				1264;1265			3	3	3	3.9	3.9	3.9	76.977	0	29.755	341310000	168	686	P35817
11109000	8083500	11033000	9115800	11384000	10113000	6152300	13912000	11547000	9328700	7474600	8159600	8221600	8264000	4225500	8266700	10591000	13359000	17524000	11872000	9503000	4679300	12131000	16877000	7575100	5490400	9727000	7696800	9719200	18280000	5535700				1266;1267;1268;1269;1270			5	5	5	57.3	57.3	57.3	8.8653	0	43.812	824390000	518	82	P38711;P35997
0	0	0	0	1089400	511720	777230	0	954210	411140	1145500	0	0	0	0	0	0	1101200	0	0	979010	542210	662790	0	1201100	0	0	0	0	0	0				1271	172;211		5	5	4	24.8	24.8	19.2	46.52	0	155.96	69091000	97	412	P36008
0	0	0	0	0	0	0	0	0	0	0	0	0	1414100	0	0	0	0	0	0	0	0	0	0	0	0	0	0	0	0	0	+			1272			1	1	1	19.6	19.6	19.6	17.166	1	-2	3944900	1	153	P36010
0	0	0	0	0	0	0	0	371200	0	0	0	0	0	0	0	0	0	0	0	0	0	0	0	0	0	0	0	0	0	0				1273			1	1	1	6.1	6.1	6.1	26.841	0.0056075	1.8995	7392500	1	229	P36012
0	0	0	1225100	795100	0	0	0	762860	0	0	0	0	0	505540	1099100	0	0	688220	0	0	0	0	0	14700000	0	0	0	0	0	0				1274;1275			1	1	1	4.5	4.5	4.5	44.536	0	44.358	82647000	26	403	P36046
0	0	0	0	0	0	0	0	0	0	0	0	0	11048000	0	0	0	0	0	0	0	0	0	0	0	0	0	0	0	0	0				1276			1	1	1	10.4	10.4	10.4	38.887	0.0019822	2.3517	38335000	3	338	P36047
0	0	0	0	0	0	0	0	0	0	0	0	0	0	5176600	0	0	0	0	0	0	0	0	0	0	0	0	0	0	0	0				1277;1278;1279			2	2	2	8.4	8.4	8.4	49.734	0	2.5503	27776000	3	427	P36049
4167200	1334900	2638400	4687400	6583100	2485400	4978600	4016800	10066000	6353900	7932400	0	0	1957900	2831200	880510	3628100	10290000	1666800	0	9685600	3459700	5014500	0	5346700	1750600	3630300	8382700	0	0	2872600				1280			7	7	7	36.8	36.8	36.8	34.137	0	131.28	282830000	127	302	P36060
0	0	0	0	0	0	4437500	1451900	2396700	0	6125400	0	0	0	0	1005200	0	2570800	3976500	0	1563100	0	0	0	0	0	0	0	0	0	0				1281			1	1	1	3.8	3.8	3.8	40.646	0	7.2715	75635000	42	366	P36093
0	0	0	0	0	0	0	0	0	0	0	0	0	0	0	0	0	0	0	0	0	0	0	0	0	0	0	0	934110	0	0				1282			1	1	1	5.8	5.8	5.8	42.271	0.0038685	2.1493	4516500	3	363	P36094
0	0	0	0	0	0	0	0	0	0	0	0	0	1577100	0	0	0	0	0	0	0	0	0	0	0	0	0	0	0	0	0				1283			1	1	1	3.5	3.5	3.5	54.741	0	10.788	77106000	77	482	P36100
0	0	0	4074500	2340700	0	6280500	2268100	2624400	0	4666900	0	0	8046600	8394500	0	0	0	4278500	0	2924700	0	0	3416800	4537700	0	0	1931200	0	0	0				1284;1285;1286;1287;1288	215		6	6	6	34.1	34.1	34.1	15.153	0	13.12	172530000	73	138	P38754;P36105
1676800	1516700	4335600	995450	1216800	3041600	0	1485300	3654900	2477400	2252600	2482300	4727800	654670	4847500	4297900	2642400	2393400	3249200	3769600	3905800	3432400	8714100	5356000	0	7637200	7298600	6496900	2250000	0	4358600				1289;1290;1291;1292;1293;1294;1295;1296			8	8	8	33.2	33.2	33.2	31.246	0	15.338	272110000	101	283	P36139
11849000	8555100	15676000	6583700	12291000	11496000	13872000	18604000	16150000	8931400	18529000	14036000	11306000	0	102740000	27008000	7919900	11757000	41388000	0	16002000	11587000	22467000	15919000	11741000	32802000	19206000	26062000	16631000	18100000	16981000				1297;1298;1299;1300;1301;1302	216		6	6	6	18.6	18.6	18.6	36.985	0	13.832	1548800000	493	328	P36145
0	0	0	3139300	0	0	0	0	0	0	0	0	0	0	0	0	0	0	2076200	0	0	0	0	0	0	0	0	0	0	0	0				1303			2	2	2	3.3	3.3	3.3	44.019	0	11.04	43458000	12	394	P36421
0	0	0	0	0	0	0	0	0	0	0	0	0	0	513570	0	0	0	0	0	0	0	0	0	0	0	0	0	0	0	0	+			1304			1	1	1	9.2	9.2	9.2	17.738	1	-2	5276300	2	153	P37263
302400000	177070000	198890000	203950000	292160000	236130000	396380000	308280000	195750000	233400000	131670000	150430000	296180000	134390000	33431000	166100000	190660000	107460000	148510000	181980000	163020000	123250000	138780000	208710000	88733000	133920000	111420000	71284000	229870000	274910000	126500000				1305;1306	218;219;220;221;222		32	32	32	77.8	77.8	77.8	52.218	0	323.31	18762000000	2543	469	P37291
0	0	744740	11560000	7981000	4665000	7787900	22876000	11711000	3024600	7827600	5312900	4254200	12642000	5412000	1697900	3151100	4265600	5433300	3566300	8400900	3203300	1306100	2842300	6672600	0	1478100	2882300	10406000	0	4121300				1307;1308;1309;1310;1311;1312			19	19	19	77.4	77.4	77.4	34.805	0	278.61	535600000	238	319	P38011
0	0	0	0	0	0	0	0	0	1146400	0	0	0	0	0	0	0	0	0	0	0	0	0	0	0	0	0	0	0	0	0				1313			3	3	3	23.9	23.9	23.9	19.114	0	36.571	37361000	15	176	P38013
281990000	530710000	417070000	60074000	273010000	463590000	645310000	170600000	251420000	491600000	786300000	65364000	221480000	206590000	76259000	229670000	341200000	641060000	187250000	528070000	421360000	433990000	435160000	133930000	640660000	169140000	246630000	355600000	350770000	310630000	176470000				1314;1315;1316;1317;1318;1319;1320;1321;1322			23	23	23	97.7	97.7	97.7	14.771	0	307.41	25244000000	3742	130	P38061
0	0	1003600	0	0	0	0	0	0	0	0	0	0	0	0	0	0	0	0	0	0	0	0	0	0	0	0	0	0	0	0				1323			2	2	2	10	10	10	25.009	0	11.726	5284800	3	220	P38082
0	0	0	0	0	0	0	0	0	0	0	0	0	0	0	0	0	0	0	0	4205600	0	0	0	0	0	0	0	0	0	0				1324			2	2	2	1.1	1.1	1.1	273.34	0.0078603	1.4703	113820000	0	2368	P38111
0	0	0	950230	0	0	2452100	5960900	1839000	1904100	1875500	0	0	3253000	0	0	896690	0	2316900	0	1582600	0	0	2152500	1632200	0	0	0	0	0	455150				1325			7	7	7	23.8	23.8	23.8	38.883	0	77.158	134540000	75	344	P38115
0	0	0	0	3128600	3683300	0	0	0	2145100	2980100	2585800	0	0	0	0	0	0	3028700	0	0	0	0	0	0	0	0	0	0	0	0				1326			3	3	3	6	6	6	78.773	0	12.045	119510000	19	705	P38121
0	0	0	0	0	0	0	0	0	0	0	0	0	0	0	0	0	0	0	0	0	0	0	0	0	0	0	0	854310	0	0				1327			2	2	2	5	5	5	63.46	0.0057034	2.0327	9597900	2	564	P38126
0	0	187400	656820	452080	0	290190	0	216130	372430	0	0	8171700	6578800	0	0	0	0	970520	0	0	0	0	0	0	181780	0	442820	3159800	0	0				1328;1329;1330	224;225		6	6	6	6.7	6.7	6.7	131.1	0	24.997	84981000	30	1129	P38144
28006000	30557000	23517000	12873000	28771000	20114000	21390000	10162000	59748000	40782000	31118000	25430000	46699000	68076000	46759000	126930000	64625000	49047000	20060000	102250000	51979000	107490000	92621000	59954000	24901000	103630000	60737000	69746000	22557000	0	65140000				1331;1332;1333;1334;1335;1336;1337;1338;1339;1340			19	19	19	18	18	18	86.215	0	186.37	3575200000	1169	754	P38170
0	0	0	0	0	0	0	0	0	0	0	0	0	6484800	0	4049500	1426300	0	8939500	0	1716300	0	0	8213300	0	0	2295000	3019000	0	0	0				1341;1342			3	3	3	26.5	26.5	26.5	13.627	0	7.5095	165720000	42	117	P38182
0	0	0	22294000	0	0	3242600	0	0	0	3008300	0	0	0	0	5153200	0	0	0	0	0	0	0	0	0	0	0	0	0	0	0				1343	226		2	2	2	20.7	20.7	20.7	16.505	0	73.99	204000000	61	145	P38204
5379500	0	3458300	1275800	3416600	4196900	0	1839400	4017200	6348800	6828800	2915600	2430500	0	2882100	0	3240100	4693200	3503900	0	0	0	4677900	3153900	0	0	4384500	3587700	2653800	0	0				1344			3	3	3	28.3	28.3	28.3	19.792	0	26.859	285840000	418	180	P38210
0	0	0	0	0	0	0	0	0	0	0	0	0	0	0	0	0	0	0	0	0	0	6057500	0	0	0	0	0	0	0	0				1345	227		1	1	1	3.6	3.6	3.6	44.174	0.0094502	1.3926	125540000	2	394	P38219
0	0	0	0	0	0	0	0	0	0	12259000	0	0	0	0	0	0	0	0	0	0	0	0	0	0	0	0	0	0	0	0				1346		218;273;274;77;78;79	2	2	2	30.2	30.2	30.2	20.454	0	3.2453	963450000	15	179	P38276
7016200	2653800	34193000	5845500	5076600	3244800	3500500	1767700	1404500	0	1674000	0	0	1734700	5589400	0	0	0	2366100	0	0	3280700	0	0	0	3282900	0	7055700	0	0	0				1347;1348;1349;1350;1351	230;231		6	6	6	11.9	11.9	11.9	79.185	0	233.14	284710000	158	698	P38283
21259000	4700100	27538000	0	45597000	18105000	20895000	119720000	35551000	10495000	19298000	13343000	33935000	12092000	0	84478000	23161000	15767000	61727000	18663000	24916000	16416000	70456000	29255000	27101000	53210000	10534000	20670000	112910000	57735000	0				1352;1353			5	5	5	55.2	55.2	55.2	14.609	0	323.31	2897600000	339	134	P38325
0	0	0	0	0	0	0	0	0	0	0	0	0	0	1173900	0	0	0	0	0	0	0	0	0	0	0	0	0	0	0	0	+			1354			1	1	1	3.3	3.3	3.3	34.343	1	-2	7143400	4	303	P38326
8762800	9650500	12730000	4326900	7343000	10570000	13368000	6445400	12169000	9309000	15978000	4851600	4379500	3920300	6254100	7180000	4398300	8075600	12960000	7342900	12307000	9142800	5084100	3532100	3680300	12393000	6124700	8844700	3465700	0	5922700				1355;1356;1357;1358		220;81;82	6	6	6	14.4	14.4	14.4	51.8	0	254.76	667130000	233	445	P38351
0	0	0	0	0	0	0	0	0	0	0	0	0	14173000	0	0	0	0	0	0	0	0	0	0	0	0	0	0	0	0	0				1359			2	2	2	10.6	10.6	10.6	45.261	0	39.231	43808000	4	405	P38431
0	0	0	0	0	0	0	0	0	0	0	0	0	0	539640	0	0	0	0	0	0	0	0	0	0	0	0	0	0	0	0				1360		83	2	2	2	3.4	3.4	3.4	53.919	0.0020161	2.464	9020600	3	464	P38439
0	0	0	0	0	0	0	0	0	0	0	0	0	1508300	0	0	0	0	0	0	0	0	0	0	0	0	0	0	0	0	0				1361			2	2	2	10.1	10.1	10.1	26.066	0	57.991	241380000	132	228	P38523
93143000	67973000	68447000	0	17990000	14987000	0	0	0	0	29857000	0	0	0	0	0	0	0	0	0	0	0	0	0	0	29656000	0	30563000	0	0	0				1362;1363			2	2	2	3	3	3	94.902	0	7.3793	1236100000	38	861	P38630
0	0	0	0	0	0	0	0	0	0	0	0	0	0	0	0	0	0	1785900	0	0	0	0	0	0	0	0	0	0	0	0				1364			1	1	1	15.1	15.1	15.1	8.2206	0.0072137	1.6472	22506000	2	73	P38636
15849000	19690000	16209000	9688500	14726000	15937000	11038000	9034300	15672000	14883000	13184000	8480200	8819500	10218000	20208000	18778000	21959000	19911000	7935200	18071000	15783000	27236000	24938000	6922800	27186000	22249000	21697000	15640000	8336400	0	11796000				1365;1366;1367;1368;1369;1370;1371			7	7	7	49.6	49.6	49.6	13.907	0	166.97	1072900000	325	121	P38701
0	0	0	0	0	0	0	0	0	0	0	0	0	890450	0	0	0	0	0	0	0	0	0	0	0	0	0	0	0	0	0				1372			3	3	3	7.4	7.4	7.4	62.206	0	2.9094	40060000	32	554	P38707
21370000	16884000	33585000	40021000	136450000	165920000	183000000	139420000	191680000	212730000	184920000	172690000	221550000	32236000	20328000	250960000	241630000	202580000	182400000	218490000	236620000	555720000	223630000	282280000	231260000	201900000	269280000	271800000	338090000	274330000	502620000				1373;1374;1375	234;235;236;237		33	33	33	45.7	45.7	45.7	80.108	0	323.31	18429000000	2913	713	P38741
0	0	0	0	0	0	0	0	0	0	0	0	0	0	749320	0	0	0	0	0	0	0	0	0	0	0	0	0	0	0	0				1376			1	1	1	8.1	8.1	8.1	12.009	0.0072398	1.6775	2257600	2	111	P38804
68613000	61864000	62818000	58713000	54951000	44141000	52512000	35934000	36586000	62766000	62644000	58376000	45458000	31717000	47904000	46123000	80130000	52529000	34421000	44449000	55659000	70952000	63120000	26462000	61057000	70387000	52059000	65309000	33532000	45478000	50103000				1377;1378	241	221;84	15	15	15	53.3	53.3	53.3	40.662	0	323.31	4415700000	1356	366	P38809;Q05518
0	0	0	0	0	0	0	0	0	0	0	0	0	251820	0	0	0	0	0	0	0	0	0	0	0	0	0	0	0	0	0				1379			2	2	1	9.4	9.4	3.2	37.087	0	4.7711	30838000	27	342	P38816
0	0	0	0	0	0	0	0	0	0	0	1878700	0	0	1328200	0	0	0	1975300	0	0	0	1753600	1922400	0	0	3637100	3913100	0	0	0				1380			3	3	3	3.1	3.1	3.1	123.91	0	12.304	88921000	45	1080	P38827
0	0	0	0	0	0	0	0	0	0	0	0	0	0	0	0	0	0	0	0	0	0	0	0	0	0	0	1074400	0	0	0				1381			1	1	1	1.6	1.6	1.6	71.427	0.0072267	1.6766	23743000	6	630	P38862
0	0	0	0	0	0	0	0	0	0	0	0	0	0	0	0	0	0	2894900	0	0	0	0	0	0	7634500	8672900	9252000	13432000	0	0				1382;1383			2	2	2	4.2	4.2	4.2	65.815	0	4.39	120280000	17	571	P38871
3125700	0	3698100	2787700	1340500	0	1091900	3245200	2300000	0	2333700	8196200	0	1550300	2912000	0	0	0	18786000	0	0	0	4595200	9331400	0	0	4782600	0	4337300	0	0				1384;1385;1386;1387;1388			7	7	7	52.3	52.3	52.3	18.709	0	42.709	313280000	52	174	P38879
48063000	49192000	43159000	18316000	28848000	27859000	18520000	19094000	38197000	47632000	21083000	13628000	30551000	25225000	146200000	44426000	22062000	27479000	25040000	25641000	48371000	18158000	29740000	9659000	0	48282000	24519000	57885000	0	0	0				1389;1390;1391;1392;1393;1394	248	222;223;85;86	14	14	14	14.5	14.5	14.5	161.6	0	197.27	2575200000	428	1435	P38904
1696300	1387400	4439200	996460	0	1599600	0	1258300	1547100	0	0	1148400	0	0	1204000	0	0	0	0	0	0	0	0	0	0	0	1209600	0	0	0	0				1395;1396;1397			3	3	3	24.5	24.5	24.5	11.372	0	4.3361	62958000	15	106	P38910
0	0	1064200	0	715250	968570	0	0	0	0	0	0	640500	0	0	1606800	1140600	0	0	0	0	1573900	0	407460	0	2040000	1584000	1406400	0	0	867040				1398			1	1	1	2.4	2.4	2.4	46.553	0.0078878	1.4827	43065000	33	411	P38911
0	0	0	0	0	0	0	0	0	0	0	0	0	0	0	0	0	0	0	0	0	0	0	0	0	0	0	0	734660	0	0				1399			2	2	2	15	15	15	17.435	0	3.746	42253000	6	153	P38912
0	0	0	0	0	0	0	0	0	0	0	0	0	0	1473300	0	0	0	0	0	0	0	0	0	0	0	0	0	0	0	0				1400;1401	249		4	4	4	8.1	8.1	8.1	54.639	0	2.9075	44782000	3	470	P38934
0	0	0	0	0	0	0	0	0	0	0	0	0	0	0	0	0	0	0	0	0	0	0	2901300	0	0	0	0	4820000	0	0				1402;1403;1404	251		5	5	5	4.9	4.9	4.9	133.93	0	8.018	74513000	13	1170	P38989
0	0	0	0	0	0	0	0	0	0	0	0	0	1171500	0	0	0	0	0	0	0	0	0	0	0	0	0	0	0	0	0				1405			1	1	1	3.5	3.5	3.5	42.945	0.0079156	1.4982	5694300	2	367	P38991
4812900	5776600	5163500	3015300	3482400	2832000	3113100	3108700	5141000	3301500	3581400	3746500	3146800	4452000	21230000	5142500	2584000	3291400	5065800	6689600	6134900	4648300	3738000	2579000	0	4081200	3400600	4028600	0	0	0				1406		87	4	4	4	7.2	7.2	7.2	91.123	0	19.137	329400000	139	836	P39001
0	0	0	1829700	0	0	0	0	0	0	0	0	0	1898200	3300800	3381800	0	0	5094200	0	0	0	3711300	2037200	0	0	0	0	1142100	0	0				1407;1408;1409;1410;1411;1412			6	6	6	27.5	27.5	27.5	29.995	0	43.529	112800000	82	273	P39015
0	0	0	0	0	0	0	0	0	0	0	0	0	0	542100	0	0	0	0	0	0	0	0	0	0	0	0	0	0	0	0	+			1413			1	1	1	1.4	1.4	1.4	71.897	1	-2	4934200	5	626	P39081
0	0	0	0	0	0	0	0	0	0	0	0	0	0	6087600	0	0	0	4670200	0	0	0	0	0	0	6524300	0	0	0	0	0				1414;1415	256		2	2	2	2	2	2	160.48	0	7.7638	129730000	35	1433	P39113
8906200	0	5709900	0	8307600	0	0	0	10775000	0	13545000	0	11996000	31617000	20015000	5074200	4371200	8090100	20264000	0	13630000	6893700	5227500	8674100	0	6823800	4244300	13037000	0	0	0				1416;1417;1418;1419;1420			8	8	8	9.8	9.8	9.8	103.5	0	255.94	699230000	169	936	P39521
2326100	2777200	3962700	1968000	2538000	1773300	0	1716300	3390900	0	0	2605700	2536200	0	5846100	5612700	0	0	4515700	0	0	6120900	1618900	3720100	0	0	0	0	1638300	0	0				1421;1422;1423;1424;1425;1426			10	10	10	21.2	21.2	21.2	59.039	0	21.708	197420000	56	539	P39705
0	0	0	0	0	0	0	0	0	0	0	0	0	0	0	0	0	0	0	0	2262100	0	0	0	0	0	0	0	0	0	0				1427;1428			2	2	2	7.2	7.2	7.2	49.627	0	23.916	67783000	83	457	P39708;P07262
0	0	0	0	0	0	0	0	0	0	0	0	0	294720	0	0	0	0	0	0	0	0	0	0	0	0	0	0	0	0	0				1429			2	2	2	18.9	18.9	18.9	23.891	0.0078397	1.467	3216800	1	212	P39715
0	0	0	0	0	0	0	0	2149600	0	0	1408300	0	0	0	1262100	0	0	0	0	1415200	1059500	0	0	0	2047900	1208300	0	1466500	0	0				1430;1431	258		4	4	4	4	4	4	118.89	0	28.101	67102000	41	1047	P39720
0	0	0	0	0	0	0	0	0	0	0	0	0	0	901610	0	0	0	0	0	0	0	0	0	0	0	0	0	0	0	0	+			1432			2	2	2	3	3	3	81.6	1	-2	3682800	2	710	P39744
0	0	0	0	0	0	0	0	0	0	0	0	0	0	0	0	0	0	0	0	0	0	0	0	0	0	0	0	0	0	0				1433			1	1	1	5.8	5.8	5.8	26.987	0	31.028	0	1	240	P39929
0	0	0	719630	0	0	0	0	0	0	0	0	0	0	0	1309900	0	0	0	0	0	0	0	0	720610	0	1259800	1494400	0	0	0				1434			1	1	1	1.1	1.1	1.1	107.1	0.0038873	2.1978	23081000	26	952	P39935
2226300	3304000	14076000	2633300	13512000	27902000	24871000	5702400	8978300	22711000	13613000	0	3913800	4743000	0	4797700	19970000	10205000	1838200	11453000	11176000	10473000	7247700	2776900	15425000	3779500	11388000	9646400	7719300	0	26547000				1435;1436	263		11	11	11	31.6	31.6	31.6	49.125	0	96.202	741700000	609	449	P39954
7737200	4223500	9119500	0	9494600	6190800	7187800	0	10921000	7458400	10892000	2723400	3177400	4029400	26092000	22603000	5454500	7755500	7600700	5492900	12769000	10784000	7072300	2448300	0	18808000	11293000	15730000	2236400	0	0				1437;1438		224;89	2	2	2	4.6	4.6	4.6	90.21	0	56.692	561910000	293	796	P39956
0	0	0	0	0	0	0	0	0	0	0	0	0	0	0	0	0	0	0	0	0	0	0	0	0	0	0	0	0	0	0	+			1439	265	279	1	1	1	2	2	2	57.354	1	-2	0	1	493	P39997
0	0	0	0	0	0	0	0	0	0	0	0	0	0	0	0	0	0	0	0	0	0	0	0	0	0	0	0	519080	0	0	+			1440			3	3	3	4.8	4.8	4.8	98.811	1	-2	9990700	2	876	P40020
0	0	0	0	0	0	0	0	0	0	0	0	0	0	0	0	0	0	1550100	0	0	0	0	0	0	0	0	0	0	0	0				1441			2	2	2	2.7	2.7	2.7	62.318	0.005597	1.8781	21729000	4	548	P40036
0	0	0	0	0	0	0	0	0	0	0	0	0	682970	0	0	0	0	0	0	0	0	0	0	0	0	0	0	0	0	0	+			1442			1	1	1	6.4	6.4	6.4	24.137	1	-2	1684100	2	218	P40040
549360000	558430000	725800000	1007300000	379240000	378580000	498060000	418900000	321320000	353790000	384670000	476930000	375860000	225050000	83248000	239180000	348540000	285720000	411580000	278420000	159860000	298620000	223560000	487370000	266660000	223900000	229680000	268780000	387810000	304950000	261440000				1443;1444	268		27	27	27	86.3	86.3	86.3	18.989	0	323.31	38362000000	10311	161	P40043
0	0	0	0	0	0	0	0	0	0	0	0	0	0	3333700	0	0	0	0	0	0	0	0	0	0	0	0	0	0	0	0				1445			1	1	1	7.1	7.1	7.1	23.197	0	2.5541	39957000	12	210	P40052
9684700	10061000	16505000	15509000	6380700	0	0	2234600	0	3167000	0	6420600	5975800	0	5202000	0	4666400	0	4413600	0	0	0	0	3385100	0	0	0	10393000	3745600	0	0				1446			4	4	4	9	9	9	62.316	0	17.555	396330000	75	554	P40055
0	0	0	0	0	0	0	0	0	0	0	0	0	828100	0	0	0	0	0	0	0	0	0	0	0	0	0	0	0	0	0				1447			2	2	2	23.2	23.2	23.2	14.312	0.0038573	2.138	22485000	4	125	P40060
0	0	0	0	0	0	0	0	1935700	0	0	0	0	0	0	17323000	0	0	26563000	0	0	0	0	5457300	0	123480000	93877000	83039000	170770000	0	0				1448		93	3	3	3	8.6	8.6	8.6	35.752	0	77.126	1767400000	205	302	P40065
6442200	5368400	7942000	3227500	5296800	4592800	4570000	4863700	15728000	4979000	5109900	8861700	0	0	19865000	30791000	23233000	9964900	10092000	15608000	32165000	9006500	21638000	25449000	8563000	47635000	38615000	35608000	33450000	0	8157200				1449;1450			2	2	2	6.6	6.6	6.6	26.925	0	17.716	1170900000	343	244	P40075
0	0	0	0	0	0	0	0	0	0	0	0	0	0	0	0	0	0	0	0	0	0	0	0	0	0	3519400	0	0	0	0	+			1451			1	1	1	1.7	1.7	1.7	40.794	1	-2	59975000	10	357	P40079
0	0	0	0	0	0	0	0	0	0	0	0	0	0	0	0	0	0	0	0	0	0	0	0	0	529880	0	0	0	0	0				1452			1	1	1	11.3	11.3	11.3	15.516	0.001998	2.4316	14575000	23	142	P40096
0	0	0	0	0	0	0	0	0	0	0	0	1726100	0	0	0	0	0	4420000	0	0	0	0	0	0	0	0	0	0	0	0				1453;1454			2	2	2	3.9	3.9	3.9	66.543	0	7.3786	49226000	11	587	P40151
0	0	0	0	0	0	0	0	0	0	0	0	0	409440	0	0	0	0	0	0	0	0	0	0	0	0	0	0	0	0	0				1455			1	1	1	4.1	4.1	4.1	36.153	0.0019608	2.2892	1100100	1	320	P40154
312610000	184360000	148820000	124640000	53915000	83339000	79884000	33544000	43899000	70420000	72017000	88523000	33548000	6961600	11689000	50002000	93067000	42787000	32791000	84074000	32642000	46533000	51272000	60857000	39590000	44789000	38520000	34193000	25557000	5663500	33548000				1456;1457;1458;1459	269		26	26	26	85.4	85.4	85.4	19.229	0	323.31	5873300000	2278	164	P40188
0	0	0	736220	0	0	0	0	0	0	0	518880	0	0	5216500	0	0	0	674920	0	0	0	0	0	0	0	0	0	0	0	0				1460;1461			4	4	4	18.1	18.1	18.1	22.525	0	3.4128	33772000	15	199	P40212;Q12690
0	0	0	0	0	0	0	0	0	0	0	0	0	0	0	0	0	0	0	0	0	0	0	0	0	0	0	0	0	0	0	+			1462;1463;1464;1465			1	1	1	5.5	5.5	5.5	38.755	1	-2	0	2	347	P40217
0	0	0	0	0	0	0	0	0	0	0	0	0	0	602870	0	0	0	0	0	0	0	0	0	0	0	0	0	0	0	0				1466			1	1	1	7.6	7.6	7.6	25.915	0.0019802	2.3412	11722000	10	223	P40218
0	0	0	0	0	0	0	0	0	0	0	0	0	0	0	0	0	0	0	0	0	0	569640	0	0	0	538190	0	0	0	0				1467			4	4	4	41	41	41	25.604	0	79.53	27365000	35	234	P40302
0	0	0	0	0	0	0	0	0	0	0	0	0	2278100	0	0	0	0	0	0	0	0	0	0	0	0	0	0	0	0	0				1468			1	1	1	3.7	3.7	3.7	36.149	0.0020222	2.5032	19022000	9	323	P40339
0	0	0	0	0	0	0	0	0	0	0	0	0	4705800	0	0	0	0	0	0	0	0	0	0	0	0	0	0	0	0	0				1469			2	2	2	1.7	1.7	1.7	157.41	0	5.844	20487000	3	1379	P40340
0	0	0	0	0	0	0	0	0	0	0	0	0	0	0	0	0	0	0	0	0	0	0	0	0	0	0	0	652040	0	0	+			1470			1	1	1	4	4	4	70.973	1	-2	4067500	2	622	P40343
0	0	0	0	0	0	0	0	0	0	0	0	0	0	0	0	0	0	0	0	0	0	0	0	3878000	0	0	0	0	0	0				1471			2	2	2	10.3	10.3	10.3	28.47	0	28.052	179110000	6	252	P40364
0	0	0	0	0	0	0	0	0	927120	2465200	1975900	3725100	0	4278700	25659000	17877000	15017000	12627000	24460000	11673000	28447000	31225000	30245000	12046000	34722000	29681000	27081000	13775000	6269600	20078000				1472;1473;1474;1475;1476;1477;1478			9	9	9	50.9	50.9	50.9	19.093	0	181.82	773970000	439	161	P40414
0	0	0	0	0	0	0	0	0	0	0	0	0	0	0	0	0	0	0	0	0	0	0	0	0	0	0	0	1784700	0	0				1479			3	3	3	2.7	2.7	2.7	195.14	0.0056711	1.9776	20065000	4	1679	P40457
1245300	0	0	0	0	0	0	0	0	0	0	0	0	0	0	0	0	0	0	0	0	0	0	0	0	0	0	0	0	0	0				1480			1	1	1	2.5	2.5	2.5	53.489	0.0064103	1.751	6613900	4	484	P40466
0	0	0	0	0	0	0	0	0	0	0	0	0	0	6644300	0	0	0	0	0	0	0	0	0	0	0	0	0	0	0	0				1481			1	1	1	0.8	0.8	0.8	108.78	0.0057252	2.0515	75588000	14	964	P40467
6225900	3594900	4220100	5884300	3878400	4170200	1710600	8090100	4380400	3397300	1620500	6510000	0	0	0	4100600	3471200	0	4586000	0	2973800	1933200	2357200	4039500	0	3297700	2804600	2270300	3095100	0	715370				1482;1483;1484			5	5	5	16.2	16.2	16.2	39.498	0	54.71	328480000	156	351	P40473
0	0	0	0	0	0	0	0	0	0	0	0	0	3143900	0	0	0	0	0	0	0	0	0	0	0	0	0	0	0	0	0				1485			1	1	1	0.5	0.5	0.5	158.91	0	12.805	9420000	1	1460	P40477
0	0	0	0	0	0	0	0	0	0	0	0	0	0	251210	0	0	0	0	0	0	0	0	0	0	0	0	0	0	0	0				1486			1	1	1	1.9	1.9	1.9	72.687	0.0019881	2.4056	5151000	3	647	P40489
0	0	0	0	0	0	0	0	0	0	0	0	0	0	0	0	0	0	0	0	703460	0	0	0	0	0	0	0	0	0	0				1487	274		4	4	4	21.1	21.1	21.1	41.866	0	45.816	46184000	10	365	P40506
0	0	0	0	0	0	0	0	0	0	0	0	0	0	0	34067000	0	0	0	0	0	0	0	0	0	0	0	0	0	0	0				1488;1489			4	4	4	4.8	4.8	4.8	112.43	0	3.2475	163630000	10	975	P40511
34725000	36404000	6379400	6682000	2166700	2388400	0	1795200	3522000	0	0	0	0	6134500	15395000	899800	0	0	1308800	0	0	0	0	0	0	1185100	0	0	0	0	0				1490;1491			1	1	1	1.6	1.6	1.6	71.42	0	73.297	336940000	97	640	P40522
11678000	9463600	6389000	22829000	8472900	8842600	13544000	19010000	8939000	7489400	13817000	19386000	9760500	13300000	8499600	31773000	13364000	13172000	38759000	19469000	16544000	23278000	19382000	62958000	11950000	7265700	9985300	9772500	34123000	0	12433000				1492;1493;1494			7	7	3	46.3	46.3	14	13.641	0	47.469	1371800000	244	121	P40525
0	0	0	0	0	0	0	0	0	0	0	0	0	0	663620	0	0	0	0	0	0	0	0	0	0	0	0	0	0	0	0	+			1495;1496			1	1	1	3.7	3.7	3.7	36.67	1	-2	1805800	2	326	P40531
0	0	0	0	0	0	0	0	0	0	0	0	0	8232400	0	0	0	0	0	0	0	0	0	0	0	0	0	0	0	0	0				1497;1498		226;94;95	3	3	3	13.1	13.1	13.1	65.263	0	4.1662	38446000	7	587	P40535
0	0	0	0	0	0	0	0	0	0	0	0	0	0	0	4413900	0	0	630760	0	0	0	0	0	0	1699800	0	0	0	0	0				1499;1500;1501			5	5	5	4	4	4	133.01	0	7.281	50651000	13	1150	P40541
0	0	1336000	0	0	0	1705200	1398800	1493800	0	2014800	0	0	0	2432700	2160100	1244700	0	1696200	0	1538000	2123100	0	1082900	0	3565400	2084400	2410000	0	0	0				1502;1503			4	4	4	22.8	22.8	22.8	24.119	0	12.823	98799000	46	215	P40553
0	0	0	0	0	0	0	0	0	0	0	0	0	0	1465300	0	0	0	0	0	0	0	0	0	0	0	0	0	0	0	0				1504			1	1	1	4.4	4.4	4.4	28.954	0	2.7998	9049500	1	250	P40561
158490000	32990000	84420000	10283000	89649000	71701000	45997000	31684000	101490000	105550000	50548000	19490000	26583000	55312000	89396000	71510000	57671000	62520000	40874000	0	64778000	83722000	61546000	27662000	0	72247000	42734000	52298000	14261000	0	52797000				1505			4	4	4	12.8	12.8	12.8	21.589	0	323.31	4275500000	695	187	P40573
0	0	0	0	0	0	0	0	0	0	0	0	0	0	2660300	0	0	0	0	0	0	0	0	0	0	0	0	0	0	0	0				1506			3	3	3	22.1	22.1	22.1	18.641	0	4.2733	53001000	51	163	P40581;P38143
0	0	0	0	0	0	0	0	0	0	0	0	0	1454300	0	0	0	0	0	0	0	0	0	0	0	0	0	0	0	0	0				1507			2	2	2	8.7	8.7	8.7	36.559	0.0020182	2.4879	97980000	17	322	P40693
0	0	0	0	0	0	0	0	0	0	0	0	0	0	563410	0	0	0	0	0	0	0	0	0	0	0	0	0	0	0	0				1508			1	1	1	6.1	6.1	6.1	21.479	0.0020202	2.5005	20435000	9	196	P40892
1440900	0	0	0	0	0	0	0	0	0	0	0	0	0	0	0	0	0	0	0	0	0	0	0	0	0	0	0	0	0	0	+			1509			1	1	1	8.8	8.8	8.8	32.975	1	-2	3625000	2	295	P40917
0	0	0	0	0	0	0	0	0	0	0	0	0	9208200	0	0	0	0	0	0	0	0	0	0	0	0	0	0	0	0	0				1510	275		3	3	3	12.9	12.9	12.9	27.053	0	6.9879	151160000	65	232	P40962
0	0	0	0	0	0	0	0	0	0	0	0	0	0	0	10864000	0	0	447830	0	0	1053700	1197500	548020	0	2495600	940740	0	333820	0	0				1511;1512;1513;1514			7	7	7	9.1	9.1	9.1	99.224	0	12.699	39362000	16	878	P40965
0	0	0	0	0	0	0	9082700	0	0	0	0	0	0	0	0	0	0	5098900	0	0	0	0	4283600	0	0	0	0	0	0	0				1515			2	2	2	9.9	9.9	9.9	52.047	0	65.397	123590000	19	455	P40968
0	0	0	0	0	0	0	0	0	0	0	0	0	3793100	0	0	0	0	0	0	0	0	0	0	0	0	0	0	0	0	0				1516;303;304;305			7	1	1	71	25.2	25.2	12.168	0	46.375	65058000	16	107	P41056
0	3290100	3912100	1663300	2252800	5267100	1981500	3448200	0	0	2973200	2985200	6418000	0	0	2879600	2925700	0	3375000	3956000	0	0	2118000	3244600	0	1902900	0	0	3872700	0	0				1517			5	5	5	98.2	98.2	98.2	6.6606	0	6.7037	235420000	107	56	P41057
0	2255200	4669700	2574000	0	7401700	0	6870500	0	726220	2590000	7367100	10897000	0	0	3335100	4431100	0	9110000	2038400	0	0	0	7899800	0	3083700	1353800	1946800	13616000	6745200	0				1518			5	5	5	98.2	98.2	98.2	6.7276	0	22.858	424570000	185	56	P41058
7565700	2385800	6956800	1087700	3243500	1966800	1937400	3698600	7126000	0	4663700	3352200	2864400	0	29968000	6767100	0	0	12525000	3247600	4818700	0	3412900	3345100	0	7128100	2518100	5638000	0	0	3321400				1519;1520;1521	276;277		4	4	4	7.3	7.3	7.3	101.17	0	35.315	429550000	220	914	P41696
0	0	0	0	0	0	0	0	0	0	0	0	0	0	0	0	0	0	0	0	0	0	0	0	0	2003800	0	0	3777000	0	0				1522			1	1	1	1.4	1.4	1.4	88.816	0	3.0658	34460000	6	788	P41697
0	0	0	2323000	3269500	9695100	2609000	2595300	13224000	6497300	0	0	7160300	108100000	11031000	7107300	4059200	1425600	13186000	0	3789400	7305900	0	6116500	11694000	11807000	3561700	14640000	3772600	0	6462300				1523;1524;1525;1526			12	12	12	86.9	86.9	86.9	25.361	0	40.342	948800000	59	221	P41805
1686400	1367100	1503100	1408800	0	0	0	1462300	1590600	0	1459100	0	1199500	0	1762400	0	0	0	6041700	1458200	0	0	1754400	0	0	2624500	0	2838200	1284800	0	0				1527;1528	278		3	3	3	14	14	14	26.649	0	13.268	112530000	18	229	P41818
29618000	35756000	26782000	9568600	10960000	16891000	7870600	5698700	18081000	20754000	16920000	0	12626000	6671300	3977800	7295400	13012000	9744000	8453600	15857000	17581000	12858000	9321200	6856500	12084000	12608000	24289000	24352000	9437800	0	24044000				1529;1530;1531;1532	279	227;96	6	6	6	9.4	9.4	9.4	82.193	0	141.42	1024700000	621	735	P41895
1538900	0	1798500	0	0	0	3354900	2362700	0	0	0	1666500	1745500	0	4165200	0	0	0	5873000	0	0	2946100	0	4253700	0	0	1886800	0	2282900	0	0				1533;1534;1535;1536;1537;1538;1539;1540	288		7	7	7	43.3	43.3	43.3	22.953	0	20.041	154480000	66	201	P41920
0	0	0	0	0	0	574930	0	560470	359690	1028900	0	0	0	0	0	0	846740	6086100	0	1142900	504230	0	0	682550	0	0	543420	0	0	425730				1541;1542;1543			7	7	7	29.6	29.6	29.6	46.562	0	27.124	118270000	55	412	P41939
0	0	0	0	0	0	0	0	0	0	0	0	0	0	1148900	0	0	0	0	0	0	0	0	0	0	0	0	0	0	0	0				1544			1	1	1	3.9	3.9	3.9	39.565	0	2.6823	11668000	10	361	P41940
0	0	0	0	0	0	0	0	0	0	0	0	0	1111500	0	0	0	0	0	0	0	0	0	0	0	0	0	0	0	0	0				1545			3	3	3	7.1	7.1	7.1	59.818	0.0055762	1.8565	2726000	5	533	P42073
0	0	0	0	0	0	0	0	55689000	0	0	79862000	0	0	0	79996000	0	0	0	0	0	65238000	0	0	0	0	0	0	0	0	0				1546;1547;1548		97	8	8	8	16.2	16.2	16.2	68.653	0	6.1222	3054800000	55	591	P42846
48530000	24586000	26997000	855190	7973100	2133900	2257800	691680	11552000	2586200	0	1068300	0	0	6163100	6844400	1661000	1912500	1640800	0	1536200	0	0	0	0	0	0	0	0	0	0				1549;1550			2	2	2	4.4	4.4	4.4	60.519	0	5.7662	422440000	105	551	P42944
0	0	0	0	3158900	0	2564800	2107700	2166300	2497400	0	0	3293200	4234500	2278400	11910000	3666300	0	525570	0	5250800	6496200	17976000	1240500	0	12716000	8985300	19260000	0	0	0				1551;1552;1553		100;101;228;229;230;98;99	4	4	4	12.7	12.7	12.7	46.12	0	38.625	245570000	113	402	P43124
0	0	0	0	0	0	0	0	0	0	0	0	0	0	0	0	0	0	0	0	0	0	0	0	0	0	0	0	1441000	0	0				1554;1555;1556	293;294;295		1	1	1	4	4	4	96.683	0.0055814	1.8579	16550000	2	858	P43553
0	0	3232400	0	0	0	1738200	0	0	0	0	0	0	0	2144200	4781400	0	0	0	0	0	0	0	0	0	5158100	4846100	0	0	0	0				1557	296		2	2	2	4	4	4	70.275	0	3.08	96423000	19	623	P43554
0	0	0	0	0	0	0	0	0	0	0	0	0	1348100	0	0	0	0	0	0	0	0	0	0	0	0	0	0	0	0	0				1558			1	1	1	3.5	3.5	3.5	56.327	0	4.8124	3423000	3	510	P43574
0	0	0	0	0	0	0	0	0	0	0	0	0	0	4806300	0	0	0	0	0	0	0	0	0	0	0	0	0	0	0	0				1559			1	1	1	1.3	1.3	1.3	78.752	0.0079365	1.5283	15424000	4	692	P43579
0	0	0	3613900	0	0	0	4983100	0	0	0	5236700	3779100	0	0	0	0	0	3210900	0	0	0	0	6239900	0	0	0	0	8378900	0	3788600				1560			5	5	5	14.6	14.6	14.6	61.753	0	12.915	177540000	76	535	P43590
0	0	0	0	0	0	0	0	0	0	0	0	0	365790	0	0	0	0	0	0	0	0	0	0	0	0	0	0	0	0	0				1561		102	2	2	2	6.1	6.1	6.1	90.896	0.003861	2.1467	1306100	3	787	P43596
0	0	0	0	0	0	0	0	2189600	0	0	0	0	0	0	4713200	0	0	0	0	4783000	0	0	2701100	0	5592400	0	7085800	3357100	0	0				1562;1563;1564			4	4	4	3.8	3.8	3.8	137.7	0	12.313	119980000	30	1233	P43597
15787000	22016000	15872000	8874500	12799000	12297000	11768000	10943000	17968000	16147000	13570000	14512000	0	0	25435000	32067000	15440000	12282000	15132000	19882000	15776000	28120000	29209000	15004000	8642500	30036000	21067000	22715000	11376000	0	17020000				1565;1566;1567;1568			7	7	7	5.2	5.2	5.2	63.167	0	61.173	1292200000	334	557	P43609
0	0	0	0	0	0	0	0	0	0	0	0	0	0	0	0	0	0	352780	0	0	0	0	0	0	0	0	0	0	0	0				1569			2	2	2	4.2	4.2	4.2	52.871	0	4.2755	8958400	2	481	P43616
0	0	1611900	0	0	0	0	0	0	0	0	0	0	0	0	0	0	0	0	0	0	0	0	0	0	0	0	0	0	0	0				1570			2	2	2	5.9	5.9	5.9	74.392	0	2.6892	14534000	3	648	P43634
0	0	0	0	0	0	0	0	0	0	0	0	0	0	0	0	0	0	0	0	0	0	0	0	0	715500	0	0	0	0	0				1571;1572			1	1	1	6.7	6.7	6.7	35.777	0.0093857	1.376	10003000	1	327	P45976
0	0	0	0	0	0	0	0	0	0	0	0	0	0	0	0	0	0	0	0	0	0	0	0	0	0	0	0	270210	0	0	+			1573			1	1	1	4.6	4.6	4.6	39.189	1	-2	7137100	1	349	P45978
0	0	0	0	2997300	2378800	2197900	0	2676500	4457100	4051000	0	0	6238900	1510200	0	0	0	0	0	0	1808500	0	0	0	0	0	0	0	0	0				1574	300		10	10	10	26.4	26.4	26.4	56.723	0	30.9	76879000	40	519	P46367
0	0	0	0	908400	0	780110	4713400	1010000	0	0	0	14220000	0	0	0	0	1232800	0	0	881210	0	0	0	603290	0	0	0	0	0	779020				1575;1576;1577			3	3	3	6.4	6.4	6.4	80.842	0	4.4316	302690000	24	708	P46655
0	0	0	0	0	0	0	0	0	0	0	0	0	916540	0	0	0	0	0	0	0	0	0	0	0	0	0	0	0	0	0				1578;1579			5	5	5	14.1	14.1	14.1	36.224	0	7.1376	17687000	7	326	P46669
0	0	0	0	0	0	0	0	0	0	0	0	0	0	11764000	0	0	0	0	0	0	0	0	0	0	0	0	0	0	0	0				1580			3	3	3	4.6	4.6	4.6	100.92	0.0056338	1.9354	113000000	4	888	P46675
144100000	85515000	154100000	52479000	56162000	40073000	41634000	60177000	66122000	38776000	26349000	54938000	77899000	95130000	47073000	33575000	42125000	28519000	36648000	0	35074000	38359000	6215400	14385000	20351000	20499000	8836900	12514000	11306000	0	21017000				1581;1582;1583			7	7	7	9.6	9.6	9.6	118.2	0	115.51	3721700000	947	1062	P46676
0	0	0	0	0	0	0	0	0	0	0	0	0	3957700	0	0	0	0	0	0	0	0	0	0	0	0	0	0	0	0	0				1584		105;280;281	3	3	3	5.2	5.2	5.2	120.69	0	5.9081	239930000	14	1066	P46677
4824600	8650800	13261000	9010100	4473100	12095000	7323900	4163400	5396300	7413300	7133600	2416900	7139200	9400400	7695600	13938000	3931800	4851900	7768800	3647200	5949300	5585500	7254600	2268400	2518100	9041600	11723000	15182000	3042600	0	4957600				1585;1586;1587;1588;1589;1590;1591;1592	301	106	11	11	11	15.5	15.5	15.5	67.687	0	40.488	552680000	221	594	P46678
39304000	38876000	38880000	26521000	32425000	32974000	27450000	17980000	36649000	29403000	26544000	17570000	21610000	17896000	31509000	33151000	33641000	35884000	16832000	32387000	32059000	38128000	40483000	17732000	63108000	29280000	37085000	28528000	16575000	38268000	38214000				1593;1594;1595;1596;1597;1598;1599;1600	302;303		10	10	2	53.3	53.3	22.9	12.738	0	186.96	2469600000	833	105	P46784
0	0	0	0	0	0	0	785200	0	0	0	0	0	0	0	0	0	0	0	0	0	0	0	0	0	0	0	0	0	0	0				1601;1602			1	1	1	9.3	9.3	9.3	40.097	0	39.096	5479600	5	345	P46946
14721000	16320000	13867000	16602000	8355500	9409900	3872100	3598700	8880700	6395700	0	0	0	3809200	5102400	4479100	2287500	0	5205900	0	4282000	2823300	0	2302400	0	1818200	2747300	0	4920300	0	0				1603;1604;1605;1606			7	7	7	35.6	35.6	35.6	26.875	0	73.558	411860000	130	233	P47006
0	0	0	0	0	788660	0	0	0	1960000	0	0	0	0	1921300	7946500	1869400	2209700	0	0	2553300	4685700	0	0	0	11319000	6514600	0	0	0	0				1607;1608			2	2	2	2.4	2.4	2.4	87.24	0	3.3107	116620000	41	764	P47027
5097100	7822200	9243200	4870400	3233900	3351400	3514800	6593500	8200900	4905700	3024700	2210300	12465000	9446700	30355000	8984700	3936900	10264000	2304600	0	5594700	16668000	13394000	2602800	0	12016000	0	15769000	917970	0	5484200				1609;1610;1611;1612;1613;1614;1615;1616;1617;1618;1619;1620;1621;1622;1623;1624	307;308		21	21	21	24.9	24.9	24.9	128.53	0	62.004	472340000	129	1189	P47035
0	0	0	0	4527200	8532800	1925300	10843000	5425700	7867300	6020200	12586000	19681000	17661000	15283000	57344000	10950000	12518000	3576600	28554000	12741000	32306000	44294000	26105000	13227000	59519000	40895000	30882000	26112000	45500000	30556000				1625;1626;1627;1628;1629;1630;1631;1632;1633;1634;1635;1636;1637;1638			19	19	19	15.1	15.1	15.1	141.33	0	111.17	1343000000	431	1230	P47037
0	0	0	0	0	0	0	0	0	0	0	0	0	535700	0	0	0	0	0	0	0	0	0	0	0	0	0	0	0	0	0				1639			2	2	2	5.6	5.6	5.6	22.495	0	3.6167	9265900	6	198	P47089
0	0	0	0	0	0	0	0	0	0	0	0	0	0	0	0	0	0	0	0	0	0	0	0	0	0	0	0	0	0	0	+			1640	309		1	1	1	15.6	15.6	15.6	12.385	1	-2	0	1	109	P47093
0	0	0	0	0	0	0	0	0	0	534750	0	0	0	0	0	0	0	0	0	0	0	0	0	0	0	0	0	0	0	0				1641			1	1	1	6	6	6	40.309	0	4.8026	2804000	3	350	P47110
7670400	9424000	10284000	4258700	10495000	9798800	12010000	4216300	8581600	12725000	13870000	4589500	6702900	12478000	6509900	9105300	10010000	15765000	3137800	13091000	12518000	15237000	11268000	3191200	18511000	5729400	16906000	11937000	9430800	0	20625000				1642			8	8	8	84.1	84.1	84.1	12.895	0	216.77	859720000	790	113	P47128
8910400	3802300	72782000	9499800	6268300	3562800	5432700	1685700	2462200	0	3325500	0	2028700	1631700	18442000	0	0	0	1394500	0	3336800	0	0	0	0	0	2230100	0	891830	0	0				1643;1644;1645;1646;1647;1648		107	10	10	10	10.9	10.9	10.9	108.67	0	219.96	463260000	54	954	P47134
0	0	0	0	0	0	0	0	0	0	0	0	0	0	21608000	0	0	0	0	0	0	0	0	0	0	0	0	0	0	0	0				1649			2	2	2	1.8	1.8	1.8	164.48	0	3.9766	81562000	2	1447	P47136
0	0	0	0	0	0	0	0	0	0	0	0	0	5672800	0	0	0	0	0	0	0	0	0	0	0	0	0	0	0	0	0				1650			3	3	3	18.8	18.8	18.8	36.372	0	18.949	39517000	36	340	P47143
2401700	3540000	3044200	0	3144000	2750300	2503900	0	0	2732000	2884700	0	3037500	0	4999700	3119300	2956600	2626300	1973000	0	2151700	3509100	2749000	1975100	0	3037000	3460600	3620200	0	0	0				1651;1652;1653;1654;992;993;995;996;997			17	5	5	50	21.6	21.6	21.634	0	8.0417	173880000	134	190	P48164
0	0	0	0	0	0	0	0	0	0	0	0	0	0	0	0	14787000	13162000	0	0	0	33831000	0	0	0	0	12204000	0	0	0	0				1655			2	2	2	3.1	3.1	3.1	101.42	0.0077453	1.4069	433450000	9	864	P48237
0	0	0	0	0	0	0	0	0	0	0	0	0	0	0	0	0	0	0	0	0	0	0	0	0	0	0	0	0	0	343880	+			1656			1	1	1	2.3	2.3	2.3	44.924	1	-2	8490300	4	387	P48412
0	0	0	0	0	0	0	0	0	0	0	0	0	0	0	0	0	0	0	0	0	0	0	0	0	0	0	1742900	0	0	0				1657			2	2	2	5.2	5.2	5.2	45.579	0	11.854	44681000	24	401	P48581
4506400	0	0	2035400	2252300	0	0	4323800	4175000	0	0	4488200	3212300	0	5444800	0	0	0	7404900	0	3501300	0	0	3404500	0	0	0	0	2455400	0	0				1658;1659;1660;1661;1662;1663			9	9	9	53.8	53.8	53.8	15.471	0	41.334	239450000	77	143	P48589
0	0	0	0	0	0	0	0	0	0	0	0	0	0	0	0	0	0	0	0	0	0	0	0	0	897210	0	0	0	0	0				1664			1	1	1	13.2	13.2	13.2	12.713	0.0057143	2.0498	20243000	4	114	P48836
0	0	0	0	0	0	0	0	0	0	0	0	0	0	0	0	0	0	0	0	0	0	0	0	0	0	0	0	353860	0	0				1665;1666;1667		108;231	2	2	2	10.1	10.1	10.1	34.684	0.0038647	2.1485	52407000	54	307	P49017
5273400	2528600	2792900	2590500	5401700	4226300	3665900	7405000	6707500	4218400	5856000	6737200	0	4513900	5388100	8055400	5692200	5221100	12634000	0	5011900	2972200	14313000	5715100	0	4851900	3529900	3075500	4421400	0	0				1668;1669;1670;1671;1672;1673;1674			10	10	10	82.1	82.1	82.1	8.8264	0	33.209	439690000	151	78	P49167
0	0	0	0	0	0	0	0	0	0	0	0	0	4482700	0	0	0	0	0	0	0	0	0	0	0	0	0	0	0	0	0				1675			2	2	2	32.2	32.2	32.2	16.79	0	30.808	44771000	9	152	P49334
0	0	0	0	0	0	0	635350	0	0	0	0	0	0	0	0	0	0	1172400	0	0	0	0	965900	0	0	0	0	0	0	0				1676			2	2	2	7.5	7.5	7.5	40.054	0.0019569	2.265	20078000	8	345	P49723
289170000	293220000	276570000	534870000	212510000	302440000	313650000	387610000	351710000	341340000	349140000	576340000	704330000	991270000	439650000	294640000	431260000	443090000	293080000	254610000	582660000	227220000	333200000	671030000	227460000	338580000	383640000	476910000	620910000	793490000	483250000				1677;1678;1679	327;328	109	22	22	22	39.2	39.2	39.2	89.24	0	323.31	59539000000	2603	785	P50089
0	0	0	0	1421000	0	0	2081300	0	0	0	1704300	0	1351200	4804800	0	0	0	4220900	0	0	0	0	0	0	0	0	0	0	0	0				1680		110	1	1	1	4.6	4.6	4.6	42.336	0	3.2444	74861000	25	388	P50105
0	0	0	0	0	0	0	0	0	0	0	0	0	0	518140	0	0	0	0	0	0	0	0	0	0	0	0	0	0	0	0				1681;1682			1	1	1	15.3	15.3	15.3	14.585	0	6.5756	93674000	95	137	P50106
0	0	0	4596300	0	0	0	2702400	0	0	0	2216300	8461700	0	0	3771600	2306400	0	1668300	2279500	0	0	2332400	6930700	0	4686000	3234700	0	7600000	0	3899400				1683	331		5	5	5	12.6	12.6	12.6	103.36	0	48.057	366440000	170	915	P50111
4084700	2537100	5248300	1195400	2347500	0	1409400	0	2029400	1502200	0	1872200	0	0	1142700	2167400	0	2068700	6772600	0	0	2053600	0	0	0	0	1303400	0	0	0	1555700				1684;1685;1686	332;333		4	4	4	57	57	57	8.8738	0	13.092	146230000	69	79	P50263
11981000000	12046000000	13723000000	21261000000	8495600000	6909600000	5085400000	17900000000	9677200000	7603900000	6524400000	18847000000	10139000000	15109000000	32337000000	13165000000	10247000000	8564400000	16765000000	9671600000	8978000000	15870000000	9830000000	10045000000	9760500000	13603000000	7977100000	10610000000	14120000000	17684000000	10875000000				1687;1688;1689;1690;1691;1692;1693;1694;1695;1696;1697;1698;1699;1700;1701	334		22	22	22	97.5	97.5	97.5	17.911	0	323.31	893270000000	5578	157	P50623
13957000	5239600	11136000	9543400	5634200	5663800	3152900	5801700	5017200	1913200	2601100	7971200	0	0	0	3405400	2294600	0	5720800	0	0	0	3415700	2415700	0	6481000	0	0	3538900	0	0				1702;1703;1704;1705			4	4	4	15.8	15.8	15.8	37.024	0	21.761	393860000	193	330	P50947
0	0	0	0	0	0	0	0	0	0	0	0	0	0	0	0	0	0	396470	0	0	0	0	0	0	0	0	0	0	0	0	+			1706;1707;1708;285;286;287;288;289;293;294;295	42		16	1	1	69.1	7.3	7.3	21.657	1	-2	2331500	1	191	P51401
0	0	0	0	0	0	0	0	0	0	0	0	0	0	0	81376000	10753000	0	741130	18597000	16492000	22421000	22708000	1653600	0	63207000	24004000	27491000	854200	0	2445100				1709;1710;1711;1712;1713;1714;1715;1716;1717;1718;1719			10	10	10	11.1	11.1	11.1	135.07	0	323.31	598560000	318	1187	P51979
35171000	35609000	33808000	80300000	32434000	26978000	65799000	94904000	39364000	15008000	70074000	132540000	70067000	1323800000	813050000	122120000	29052000	66096000	213620000	31696000	53474000	55336000	69148000	154590000	12668000	250550000	106770000	129210000	180970000	157820000	120450000				1720;1721;1722;1723;1724;1725;1726;1727;1728;1729;1730;1731;1732;1733;1734;1735;1736;1737;1738;1739;1740;1741;1742;1743;1744;1745;1746	335;336;337;338	232	37	37	37	60.8	60.8	60.8	71.258	0	323.31	12653000000	1424	636	P52488
0	0	0	0	0	0	0	0	0	0	0	0	0	0	0	0	0	0	2301600	0	0	0	0	2613800	0	8031900	0	0	2181500	0	0				1747;1748			3	3	3	13.3	13.3	13.3	39.81	0	5.1598	116190000	11	361	P53044
0	0	0	0	0	0	0	0	0	0	0	0	0	0	0	10976000	0	0	0	6626400	0	0	0	7022900	0	11570000	3871700	0	0	0	0				1749;1750;1751;1752	342		4	4	4	8.7	8.7	8.7	82.815	0	28.628	106890000	52	704	P53061
6632700	9016000	9117900	1568700	2179700	0	1748000	0	2201700	6012100	2178600	0	7876900	3366400	6175100	0	3327600	0	951720	2038200	4872600	2112300	2739600	1355400	1726500	3781800	5260000	0	1390400	7059400	0				1753;1754;1755;1756;1757;1758	343		3	3	3	8.2	8.2	8.2	65.868	0	8.6664	298340000	69	558	P53064
0	0	0	1536500	0	0	0	0	0	0	0	0	0	0	6052600	0	0	0	4644600	0	0	0	0	1326900	0	0	0	0	1313500	0	0				1759;1760			1	1	1	3.5	3.5	3.5	33.55	0	3.2077	73564000	21	289	P53072
0	0	0	0	0	0	0	0	0	0	0	0	0	47671000	0	0	0	0	0	0	0	0	0	0	0	0	0	0	0	0	0				1761			3	3	3	20.1	20.1	20.1	26.083	0.0019666	2.3116	100200000	4	219	P53102
0	0	0	0	0	0	0	0	0	0	0	0	0	0	2218200	0	0	0	0	0	0	0	0	0	0	0	0	0	0	0	0				1762;1763;1764			3	3	3	2.8	2.8	2.8	171.45	0	8.1382	12434000	8	1489	P53115
0	0	0	0	0	0	0	0	0	0	0	0	0	0	0	0	0	0	0	0	0	0	0	0	0	0	0	0	710120	0	0				1765			1	1	1	4.7	4.7	4.7	24.478	0.002924	2.2497	13725000	4	214	P53187
0	0	0	0	0	0	0	0	0	0	0	0	0	2284500	0	0	0	0	0	0	0	0	0	0	0	0	0	0	0	0	0				1766			2	2	2	5.3	5.3	5.3	55.212	0	5.4948	8709400	4	476	P53201
0	0	0	0	0	0	0	0	0	0	0	0	0	0	2211900	0	0	0	2683000	0	0	0	0	0	0	0	0	0	1067400	0	0				1767			2	2	2	3.2	3.2	3.2	71.382	0	3.955	26350000	9	620	P53207
3171700	0	0	0	3016700	0	0	2043200	2647100	0	0	1204300	0	3321800	14658000	0	0	1957000	3608500	0	0	0	7156600	1672400	0	0	2127000	2312500	1399700	0	0				1768;1769;1770;1771;1772;1773;1774			11	11	11	86.6	86.6	86.6	14.235	0	15.187	191110000	85	127	P53221;P05743
0	0	0	0	0	0	0	0	0	0	0	0	0	0	453430	0	0	0	0	0	0	0	0	0	0	0	0	0	0	0	0				1775			1	1	1	4.1	4.1	4.1	31.025	0.0078671	1.4708	6579800	1	271	P53227
0	0	0	0	0	0	0	0	0	0	0	0	0	1736000	0	0	0	0	0	0	0	0	0	0	0	0	0	0	0	0	0				1776;1777			1	1	1	6.3	6.3	6.3	37.253	0	9.1407	26460000	18	333	P53228
0	0	0	0	0	0	0	1391600	0	0	0	0	0	0	3492300	0	1944900	0	1555100	0	0	0	0	0	0	0	0	0	0	0	0				1778;1779	346;347		2	2	2	3.6	3.6	3.6	106.67	0	7.0037	66532000	22	928	P53236
0	0	0	0	0	0	0	0	0	0	0	0	0	0	7047300	0	0	0	2408800	0	0	0	0	0	0	0	0	0	0	0	0				1780;1781			4	4	4	24.2	24.2	24.2	38.349	0	7.9001	58284000	16	339	P53252
1288400	1771100	0	0	0	0	0	0	0	0	0	0	0	0	0	0	0	0	0	0	0	0	0	0	0	0	0	0	0	0	0				1782			2	2	2	3.5	3.5	3.5	69.876	0	9.8639	18145000	10	605	P53261
0	2051500	0	0	0	0	0	0	0	0	0	0	0	0	0	0	0	0	0	0	0	0	0	0	0	0	0	0	0	0	0				1783			2	2	2	6.5	6.5	6.5	80.19	0	32.342	30247000	18	713	P53276
0	0	0	0	0	0	0	0	0	0	0	0	0	0	7376500	0	0	0	0	0	0	0	0	0	0	0	0	0	0	0	0				1784			1	1	1	2.9	2.9	2.9	55.071	0	118.85	77852000	30	486	P53303
0	0	0	0	0	0	0	0	0	0	0	0	0	0	0	0	0	0	103580	0	0	0	0	0	0	0	0	0	0	0	0	+			1785			1	1	1	8.3	8.3	8.3	17.794	1	-2	3358800	1	157	P53330
0	0	0	0	0	0	0	0	0	0	0	0	0	1379100	0	0	0	0	0	0	0	0	0	0	0	0	0	0	0	0	0				1786			1	1	1	2.9	2.9	2.9	42.781	0	2.9822	7908200	6	376	P53397
8506500	5885600	2993900	2918600	5611600	4449500	5776200	2854000	12497000	8088600	8268400	3620200	5578700	1933100	16646000	26479000	27320000	10522000	17629000	10850000	10560000	17742000	11661000	5572800	2637400	23861000	26491000	27438000	6180500	0	5090100				1787;1788;1789;1790;1791;1792;1793;1794;1795;1796;1797;1798;1799;1800	354;355	113	18	18	18	57.8	57.8	57.8	27.803	0	42.894	754070000	241	258	P53551
0	0	0	0	0	0	0	0	0	0	0	0	0	0	15616000	0	0	0	4035400	0	0	0	0	0	0	0	0	0	0	0	0				1801		233	3	3	3	6.7	6.7	6.7	63.87	0	2.902	80690000	17	566	P53628
5421800	5093100	6957100	0	0	0	0	0	0	0	0	0	0	0	0	0	0	0	0	0	0	0	0	0	0	0	0	0	0	0	0				1802			2	2	2	5.2	5.2	5.2	57.701	0	151.83	62613000	43	503	P53685
0	0	0	0	0	0	0	0	0	0	0	0	0	0	0	0	0	0	0	0	0	0	0	0	0	0	0	1005700	0	0	0				1803			2	1	1	6.5	3.5	3.5	42.071	0	7.6839	23230000	10	371	P53691
0	0	0	0	0	0	0	0	0	0	0	0	0	0	0	0	0	0	775020	0	0	0	0	0	0	0	0	0	0	0	0				1804			1	1	1	7	7	7	32.284	0.0064397	1.7849	8960300	2	285	P53830
3897400	1677000	3717300	1330900	1456200	1271800	746570	1105000	1554400	0	0	1577000	0	0	456660	2055400	2312000	1354900	6249800	0	1711500	1798000	3052000	3321900	0	3653100	3085200	2179700	1524100	0	0				1805;1806;1807			4	4	4	27.5	27.5	27.5	17.103	0	10.51	156880000	79	153	P53849
6235100	0	6155300	5697800	6244500	0	3274000	5799200	9228600	4762200	4219200	9055400	0	5970200	22732000	0	8476500	0	19772000	0	11488000	0	0	16536000	0	15006000	16884000	16110000	15427000	0	0				1808;1809;1810			4	4	4	12.3	12.3	12.3	40.278	0	42.479	654350000	141	366	P53885
12662000	8191200	7807500	3507500	3519700	5581600	0	1855600	8029000	7159700	6976600	0	0	2436800	13229000	12872000	4754400	6683400	4779800	10897000	6069100	14213000	11690000	1521600	0	14009000	8205200	10155000	2617300	0	7046100				1811;1812;1813			5	5	5	13.6	13.6	13.6	49.391	0	43.327	433990000	92	425	P53911
0	0	0	0	0	0	0	0	0	0	0	0	0	0	724950	0	0	0	0	0	0	0	0	0	0	0	0	0	0	0	0				1814			2	2	2	5.8	5.8	5.8	25.981	0.0056391	1.9361	44545000	2	226	P53930
0	0	0	364910	0	0	0	0	0	0	0	0	0	0	0	0	0	0	0	0	0	0	0	0	0	0	0	0	0	0	0	+			1815			2	2	2	7.2	7.2	7.2	33.482	1	-2	2286300	2	290	P53941
0	0	0	0	0	0	0	0	0	0	0	0	0	0	0	0	0	0	0	0	0	0	0	0	0	0	0	503580	0	0	0	+			1816;1817;1818			2	2	2	5	5	5	128.14	1	-2	3538200	2	1165	P53950
0	0	0	5799700	0	0	0	0	0	0	0	0	0	0	0	0	0	0	0	0	0	0	0	0	0	0	0	0	0	0	0				1819		114;115;116;234;235	2	2	2	16.7	16.7	16.7	43.748	0	2.831	42070000	2	396	P53958
69852000	62251000	48992000	62092000	56893000	39334000	17773000	62809000	59292000	44123000	35388000	108110000	17389000	28437000	84350000	35872000	29757000	21171000	97859000	37879000	30219000	46224000	22545000	59490000	40754000	39625000	21905000	38931000	33120000	0	37189000				1820;1821			8	8	8	12.4	12.4	12.4	76.3	0	323.31	3985600000	953	678	P53968
0	0	0	0	0	0	0	0	0	0	0	0	0	13337000	0	0	0	0	0	0	0	0	0	0	0	0	0	0	0	0	0				1822;1823	358;359		1	1	1	1.1	1.1	1.1	80.069	0	6.5483	1068200000	491	706	P53973
0	0	0	0	0	0	0	0	0	0	0	0	0	5818500	0	0	0	0	0	0	0	0	0	0	0	0	0	0	0	0	0				1824;1825			2	2	2	5.8	5.8	5.8	33.102	0	18.684	575860000	149	292	P54000
0	0	1309900	0	6062100	16625000	3971600	1378800	11263000	11028000	1337800	4928600	16575000	13627000	12896000	43234000	9370900	0	1253200	10186000	4813100	2807300	14615000	1420200	0	52144000	35305000	28691000	2406800	0	4545300				1826;1827;1828;1829;1830;1831;1832;1833;1834;1835;1836;1837			18	18	18	21.8	21.8	21.8	104.4	0	154.61	726440000	311	914	P54784
61515000	79763000	116370000	64058000	48557000	61604000	80204000	33210000	50264000	56932000	83520000	35349000	54593000	1668100000	144400000	51733000	61861000	48042000	62563000	68851000	60157000	84783000	21779000	43584000	89316000	39429000	64044000	87105000	34925000	7686200	122590000				1838;1839;1840			7	7	7	14.1	14.1	14.1	54.381	0	42.241	8344000000	588	490	P54785
0	0	0	0	0	0	0	0	0	0	0	0	0	346860	0	0	0	0	0	0	0	0	0	0	0	0	0	0	0	0	0				1841			1	1	1	7	7	7	72.076	0	18.319	4144700	3	616	P54790
1986800	2456400	2793300	0	0	0	0	0	0	0	0	0	0	0	0	0	0	0	0	0	0	0	0	0	0	0	0	0	0	0	0				1842;1843			3	3	3	11.5	11.5	11.5	60.705	0	7.491	43913000	9	529	P54791
0	0	0	962050	0	0	0	0	0	0	0	0	1010400	0	936960	0	1732700	0	3535600	0	0	0	0	1075300	0	0	0	0	1469000	0	0				1844			10	10	10	28.9	28.9	28.9	55.013	0	18.724	88387000	23	491	P54839
0	0	2386600	0	0	4271900	4979000	2975900	3061000	5790000	6365200	0	0	0	6098100	1064600	4148900	0	2454900	1773700	4021100	3413500	2043800	5485900	5904600	4273900	2645100	2494400	2237300	0	5610700				1845;1846;1847;1848	360;361;362		14	14	14	69.1	69.1	69.1	41.689	0	91.622	325700000	138	375	P60010
48239000	48772000	74759000	38257000	66065000	77428000	74761000	70923000	93240000	80735000	68751000	67215000	31723000	0	47358000	157560000	79771000	84890000	61114000	66726000	96846000	159610000	145710000	53332000	43144000	164550000	116460000	165220000	43081000	61356000	57771000				1849;1850;1851;1852;1853;1854;1855;1856;1857;1858;1859			11	11	11	68.4	68.4	68.4	15.356	0	68.235	6202800000	1569	136	P61830
0	0	0	1635500	0	0	0	1696300	1521400	0	0	1765400	1597000	0	2508100	0	1364200	0	7243500	0	0	1584200	0	1197500	0	0	0	0	1070700	0	0				1860			1	1	1	3.9	3.9	3.9	23.091	0.0079858	1.5637	107030000	34	204	P69771
0	0	0	0	0	0	0	0	0	415490	0	0	0	0	0	0	0	0	0	0	0	0	0	0	0	0	0	0	0	0	0	+			1861			1	1	1	18.1	18.1	18.1	10.848	1	-2	798900	1	94	P69850
0	0	0	0	0	0	0	0	0	0	0	0	0	0	0	0	0	0	0	0	0	0	0	0	0	750190	0	0	0	0	0				1862			2	2	2	55.9	55.9	55.9	7.5337	0	6.7444	10780000	5	68	P81451
7949000	9862300	6149200	23713000	6609600	7744400	6620600	13561000	7169300	6713700	5591600	20201000	0	9009700	0	0	1933800	0	4582200	0	0	0	0	7179900	0	0	0	0	0	0	0				1493;1494;1863			6	2	2	45.5	13.2	13.2	13.639	0	33.478	449190000	214	121	P87262
0	0	0	0	0	0	0	0	0	0	0	0	0	0	0	0	0	0	0	0	0	0	0	0	0	0	0	0	4589600	0	0				1864			1	1	1	0.9	0.9	0.9	112.12	0.0019861	2.4047	354820000	85	971	P89102
0	0	0	0	0	0	0	0	0	0	0	0	0	0	0	0	0	0	0	0	0	0	0	0	0	0	0	0	341770	0	0				1865;1866			3	3	3	4.3	4.3	4.3	124.71	0.0056232	1.9177	12070000	4	1077	P89105
0	0	0	0	0	0	0	0	0	0	0	0	0	1108600	0	0	0	0	0	0	0	0	0	0	0	0	0	0	0	0	0				1867			2	2	2	4	4	4	61.906	0.0078329	1.4602	6370900	4	551	Q00684
0	0	2158600	0	0	0	0	0	0	0	0	0	0	0	1513800	0	0	0	0	0	0	0	0	0	0	0	0	0	0	0	0				1868;1869;1870;1871			6	6	6	15.7	15.7	15.7	46.65	0	12.832	39276000	21	415	Q01080
236660000	103020000	191140000	33421000	210900000	113460000	161240000	89579000	221530000	164870000	226700000	112910000	88949000	100610000	511250000	234660000	140500000	284610000	135530000	47814000	208660000	438350000	279330000	41825000	13149000	273660000	198600000	393580000	37937000	0	20891000				1872;1873;1874;1875;1876;1877;1878;1879;1880;1881;1882;1883;1884;1885;1886;1887	366;367	120;121;122;123;124	23	23	23	49.9	49.9	49.9	67.775	0	323.31	15156000000	1515	625	Q01448;P03876
0	0	0	0	0	0	0	0	2234200	0	0	0	0	0	0	0	0	0	0	0	0	0	0	0	0	0	0	0	0	0	0				1888			3	3	3	33.7	33.7	33.7	9.7878	0	6.5062	88756000	8	83	Q01519
0	11010000	13494000	11721000	20531000	29093000	18405000	18697000	22344000	26430000	20381000	41936000	18633000	20166000	9654200	67123000	54847000	34360000	18731000	37798000	27788000	93680000	71959000	37994000	12509000	97492000	94968000	61597000	28577000	29803000	45590000				1889;1890;1891;1892;1893;1894	369		25	25	25	46.7	46.7	46.7	79.14	0	187.58	2492200000	640	713	Q01574
0	3707300	3617200	4095800	0	0	0	0	0	0	0	0	0	0	0	0	0	0	0	0	0	0	0	0	0	0	0	0	0	0	0				1895;1896;1897			4	4	4	13.9	13.9	13.9	58.061	0	58.079	76214000	10	534	Q01722
0	6772400	0	0	0	7133900	4562400	9128100	9390100	5847700	5539600	7450700	0	0	0	13648000	6370200	0	20022000	0	6918500	6811700	7948200	0	0	0	7407100	7788800	0	0	0				1898;1899;1900;1901;1902			4	4	4	40.8	40.8	40.8	16.002	0	35.199	580880000	204	142	Q01855
42208000	25027000	0	0	18011000	14297000	0	14232000	21963000	22787000	16386000	0	19164000	0	42817000	40445000	15447000	18496000	20991000	0	22010000	35364000	0	0	0	51444000	0	37754000	0	0	0				1903;1904;1905;1906			5	5	5	9.3	9.3	9.3	70.191	0	13.717	1501100000	189	647	Q02100
0	0	0	0	0	0	0	0	0	0	0	0	0	0	0	332000	0	0	0	0	0	0	0	0	0	0	0	0	0	0	0				1907			2	2	2	5.1	5.1	5.1	72.29	0	9.7888	2803600	7	625	Q02206
3608400	9867900	10421000	4182600	7957200	7602800	7150700	5660200	13520000	10490000	3960900	6150800	18949000	41122000	59191000	25482000	7908100	7335700	4169700	7457900	8216300	13977000	3011200	309480	967820	11284000	5885800	9403400	872050	0	0				1908;1909;1910;1911;1912;1913;1914;1915;1916;1917;1918;1919;1920;1921;1922	370;371		20	20	20	29.3	29.3	29.3	86.365	0	79.085	807600000	388	771	Q02208
0	0	0	0	0	1843600	0	0	3503300	0	0	0	0	0	1150900	4004300	0	0	0	0	0	0	0	0	0	0	0	2670500	0	0	0				1923			2	2	2	5.9	5.9	5.9	41.299	0	4.275	130410000	12	353	Q02209
0	0	0	0	0	0	0	0	0	0	0	0	0	0	2060500	2827300	0	0	1081600	0	0	0	0	0	27348000	5946200	0	0	0	0	0				1924;1925;1926;1927			4	4	3	21	21	15.3	19.961	0	7.8647	138470000	39	176	Q02326
0	0	0	0	0	0	0	0	0	0	0	0	0	4658200	19034000	0	0	0	0	0	0	0	0	0	0	0	0	0	0	0	0				1928;1929;1930;1931;1932			5	5	5	10	10	10	62.823	0	10.754	63714000	21	562	Q02457
2012800	0	3198700	2458900	0	2829600	1422800	2238600	2153400	1657600	0	3621500	1993900	0	1208000	0	0	2266600	0	2596900	0	0	2509500	3210800	1650000	2476600	2991000	2353800	1989700	0	0				1933;1934;1935;1936;1937;1938			7	7	7	30.1	30.1	30.1	21.561	0	9.5324	136060000	51	183	Q02486
5632000	3310000	7389200	2539500	5126900	5177500	3957600	3096500	5867300	4053200	4728400	3599300	4319800	0	4971000	7565000	6878400	9232900	6170300	5460800	4138100	7222700	9612200	2684000	4214500	9651300	8558600	7807600	3302400	0	3299600				1939;1940;1941;1942;1943			7	7	7	35.7	35.7	35.7	17.02	0	9.8408	401310000	203	157	Q02642
0	0	560400	0	0	0	0	0	0	0	0	0	0	0	0	0	0	0	0	0	0	0	0	0	0	0	0	0	0	0	0				1944			1	1	1	12	12	12	10.441	0	3.0436	5506500	8	92	Q02647
59155000	90248000	107850000	68748000	48881000	91447000	31215000	34547000	42930000	52165000	29971000	65879000	87515000	40482000	73273000	120650000	71996000	41381000	110770000	77497000	41008000	93310000	94752000	100760000	30782000	98411000	103800000	79726000	61566000	95092000	76289000				1945;1946;1947;1948;1949;1950;1951;1952;1953;1954;1955;1956;1957;1958;1959;1960;1961;1962;1963;1964;1965;1966;1967;1968;1969;1970;1971;1972;1973;1974	372;373		42	42	42	51	51	51	72.377	0	172.25	6188400000	2326	621	Q02724
41785000	33907000	31321000	24508000	81247000	77782000	101160000	38955000	84405000	146120000	115890000	32450000	37639000	31064000	66525000	77213000	91437000	126380000	44263000	110890000	169980000	141620000	87636000	49040000	214460000	71222000	90459000	141030000	35385000	0	153490000				1975;1976;1977;1978;1979;1980;1981	374		19	19	2	83.8	83.8	8.8	18.242	0	118.94	5490800000	1462	160	Q02753
0	0	0	0	0	0	0	0	0	0	0	0	0	0	6002600	0	0	0	0	0	0	0	0	0	0	0	0	0	0	0	0				1982	375		1	1	1	2.6	2.6	2.6	44.636	0.0063927	1.7344	29404000	8	382	Q02775
0	0	0	0	0	0	0	0	0	0	0	0	0	0	0	0	0	0	0	0	0	0	0	0	0	0	0	0	984190	0	0				1983;1984			1	1	1	2.4	2.4	2.4	60.441	0.0064338	1.7733	30940000	7	542	Q02821
0	0	0	2760500	43038000	44881000	25475000	66236000	86384000	77028000	57350000	212470000	148430000	82466000	114530000	15962000	32215000	17008000	51114000	3709700	15143000	11433000	9578400	32950000	0	14047000	14218000	8460600	18031000	0	0				1985;1986;1987;1988;1989;1990;1991			8	8	8	26.3	26.3	26.3	41.468	0	323.31	3777800000	436	353	Q03012
0	0	0	0	0	0	0	0	2034800	3154000	3859800	0	0	5981900	0	0	0	0	0	0	0	2944200	0	0	0	0	0	1957600	0	0	0				1992;1993;1994			5	5	5	39.2	39.2	39.2	15.901	0	17.1	57831000	33	143	Q03048
8810500	5807400	10278000	3666300	10627000	12055000	9398900	7349400	14800000	12200000	15826000	5087300	0	0	28265000	12446000	9442700	18498000	19401000	7043700	17753000	11638000	14143000	6793400	0	17944000	10067000	19558000	5354100	0	0				1995			3	3	3	16.6	16.6	16.6	19.446	0	282.17	858290000	306	175	Q03323
27636000	26467000	21251000	20094000	12068000	16661000	7916100	7092700	14091000	21338000	10546000	10558000	23420000	9193100	15907000	10795000	10821000	15156000	29014000	25445000	9439500	58283000	13099000	25445000	8058500	35541000	24349000	38186000	14404000	0	15321000				1996;1997			5	5	5	10.9	10.9	10.9	51.069	0	195.39	1504000000	407	439	Q03330
0	0	0	0	0	0	0	0	0	0	0	0	0	0	861270	0	0	0	0	0	0	0	0	0	0	0	0	0	0	0	0	+			1998			1	1	1	3.7	3.7	3.7	36.879	1	-2	7922700	3	323	Q03373
36376000	47860000	24742000	9816700	23669000	10605000	12838000	5891000	20654000	18338000	15028000	4154800	12800000	9836300	37090000	32885000	37919000	15166000	3747400	0	24968000	60518000	25924000	0	0	60495000	31323000	35853000	7297300	0	6144600				1999;2000;2001;2002			6	6	6	9.4	9.4	9.4	90.579	0	265.1	1355600000	409	795	Q03388
0	0	0	0	0	0	0	0	0	0	0	0	0	0	1452300	0	0	0	0	0	0	0	0	0	0	0	0	0	0	0	0	+			2003			1	1	1	4.4	4.4	4.4	25.861	1	-2	4641700	3	229	Q03390
9798700	10277000	14289000	3249100	15342000	18188000	16486000	10052000	16993000	16690000	15702000	11038000	15039000	9457500	29651000	25189000	20555000	15501000	19066000	16388000	9593100	25844000	14060000	7057300	3672600	22692000	20015000	20883000	4194700	8364200	12026000				2004;2005;2006;2007;2008;2009;2010;2011;2012			9	9	9	48.8	48.8	48.8	23.857	0	150.63	1122000000	580	203	Q03435
6629200	5153400	5408500	0	8931600	11499000	6982600	2900800	23545000	14829000	14875000	3410900	16836000	14000000	17967000	69013000	32690000	28211000	19682000	42951000	33980000	50331000	38310000	39624000	24034000	99030000	73305000	102830000	28114000	0	32601000				2013;2014;2015	385		11	11	11	4.3	4.3	4.3	187.14	0	264.47	2092600000	670	1658	Q03661
0	0	0	1009400	0	868170	0	0	1047800	826910	1108900	1102700	0	0	0	1452500	1215700	0	0	1361500	1504200	0	1815600	2384400	2794900	1505000	1488100	1852300	0	0	1852600				2016			4	4	4	3	3	3	145.16	0	8.4912	99628000	39	1277	Q03690
819420	0	1001400	596740	0	0	0	0	1079600	0	0	0	0	0	841410	3378700	0	0	0	0	4484000	0	2875400	0	0	5669000	0	6012700	933490	0	0				2017			1	1	1	0.9	0.9	0.9	126.14	0.0029211	2.2338	78237000	33	1134	Q03735
12526000	6475900	5306000	0	4949000	5855700	6663900	0	9313700	8361600	12206000	2302800	0	0	12740000	17185000	5997000	7615900	7584500	0	14315000	12582000	8033300	923070	0	10770000	7385400	12581000	0	0	0				2018			2	2	2	3.3	3.3	3.3	57.985	0	6.7976	494400000	175	510	Q03750
1861600	0	0	0	0	0	0	0	0	0	0	0	0	0	0	0	0	0	2515600	0	1601000	0	0	0	0	0	0	0	0	0	0				2019			2	2	2	3.7	3.7	3.7	61.072	0	14.889	30469000	22	539	Q03761
0	5685900	9560800	0	0	0	0	0	0	5882600	0	0	0	0	0	9133000	9457600	11633000	0	9896300	8495200	8107200	9343000	0	0	7480200	7982200	8476600	0	0	0				2020		237	4	4	4	22.9	22.9	22.9	19.935	0	4.5705	363690000	73	175	Q03772
0	2563900	0	1275900	33159000	21277000	12027000	12969000	8751200	9508200	4561800	11537000	19057000	7148500	11468000	15009000	14391000	4014200	2354600	0	2110700	6486600	4407200	0	0	7461800	5608600	3054300	1134100	0	2554300				2021			1	1	1	0.8	0.8	0.8	140.08	0	58.621	564380000	326	1242	Q03834
0	0	0	0	0	0	0	3099700	0	0	0	4143000	5734000	6472400	5054100	0	0	0	4351600	0	0	0	0	4097300	0	0	0	0	3234000	0	5725700				2022;2023			3	3	3	16.5	16.5	16.5	33.186	0	60.314	213900000	55	291	Q03898
0	0	0	0	0	0	0	0	0	0	0	0	0	0	0	0	0	0	3524600	0	0	0	0	2462700	0	0	0	0	927990	0	0				2024;2025			7	7	7	32.1	32.1	32.1	18.258	0	6.2639	53948000	16	162	Q03937
1044500	0	0	0	0	0	0	0	0	0	0	0	0	0	0	0	0	0	0	0	0	0	0	0	0	0	0	0	0	0	0				2026			1	1	1	5.2	5.2	5.2	50.452	0	13.323	4061800	3	463	Q03940
261310000	147040000	221360000	71548000	154740000	132870000	105150000	61044000	146970000	97651000	86474000	80815000	94381000	51810000	145790000	136370000	124820000	81812000	35933000	81311000	61001000	135490000	61113000	19093000	52138000	81835000	63176000	80930000	20243000	17452000	55476000				2027;2028;2029;2030;2031;2032;2033;2034;2035			14	14	14	52.8	52.8	52.8	27.544	0	323.31	8167800000	1180	246	Q03973
0	0	0	0	0	0	0	0	0	0	0	0	0	2316200	0	0	0	0	0	0	0	0	0	0	0	0	0	0	0	0	0				2036			2	2	2	3.5	3.5	3.5	171.1	0	36.16	58108000	8	1493	Q04002
0	0	0	0	0	0	0	1517700	2204600	0	0	0	0	0	0	0	0	0	0	0	0	0	0	0	0	0	0	0	0	0	0				2037			2	2	2	9.8	9.8	9.8	27.974	0	41.452	80313000	46	235	Q04031
19463000	39758000	41545000	11957000	34480000	26042000	20434000	18415000	34208000	34610000	23207000	19857000	35718000	22185000	59778000	27377000	21129000	16750000	7974800	5177600	14408000	14665000	12378000	6153400	11735000	25144000	21748000	22251000	10897000	0	23995000				2038;2039;2040;2041;2042;2043;2044;2045;2046;2047;2048;2049;2050;2051;2052;2053;2054	388	125;126	21	21	21	64	64	64	39.354	0	123.35	2304300000	899	347	Q04087
0	18318000	61327000	1508700	77093000	69160000	37444000	28118000	619770000	1418200000	846840000	1554600000	1627500000	446300000	2563700000	28291000000	11304000000	17559000000	9622300000	18257000000	9782700000	21764000000	27207000000	9235400000	2612900000	23363000000	13623000000	18281000000	4425100000	1508400000	7886300000				2055;2056;2057;2058;2059;2060;2061;2062;2063;2064;2065;2066;2067;2068;2069;2070;2071;2072;2073;2074;2075	389;390	127;128;129;130;131;132;133;134;135;136;238;239;240;241;242;243;244;283;284	41	41	41	71.2	71.2	71.2	34.113	0	323.31	597630000000	10972	302	Q04110
2471100	1980400	927930	0	2486100	1531800	0	5277200	0	0	0	5584000	0	0	0	2428200	0	0	13541000	0	1903800	0	0	3803900	0	3869100	0	0	2893900	0	0				2076;2077;2078			5	5	5	10.3	10.3	10.3	100.79	0	138.25	252560000	64	904	Q04195
0	0	0	0	0	0	0	0	5464200	0	0	0	0	0	0	33826000	5928700	0	0	0	0	0	6108500	0	0	0	0	0	0	0	0				2079;2080;2081;2082;2083;2084	391		5	5	5	5.3	5.3	5.3	147.04	0	8.8442	765560000	23	1277	Q04264
38644000	38256000	25248000	12691000	43723000	31779000	34781000	22494000	37157000	31318000	46506000	16941000	23599000	6276600	0	30463000	38087000	27955000	17239000	47509000	48046000	30062000	29483000	25046000	49709000	33419000	33610000	27770000	67182000	59461000	47236000				2085			12	12	12	59.5	59.5	59.5	17.679	0	171.57	2416500000	890	158	Q04344
0	0	0	0	0	0	0	0	0	0	0	0	0	643040	0	0	0	0	0	0	0	0	0	0	0	0	0	0	0	0	0				2086			2	2	2	3.9	3.9	3.9	50.192	0.001994	2.415	47476000	4	439	Q04418
0	0	0	0	0	0	0	0	0	0	0	0	0	199950	0	0	0	0	0	0	0	0	0	0	0	0	0	0	0	0	0				2087			1	1	1	2.1	2.1	2.1	71.24	0.0063752	1.7268	4827700	2	629	Q04437
2141100	0	0	1115400	0	0	0	776990	0	0	0	0	0	0	1385600	1874700	0	2381600	13402000	0	0	0	0	0	0	0	0	0	0	0	0				2088;2089;2090;2091;2092			6	6	6	66.1	66.1	66.1	13.18	0	19.315	126400000	34	115	Q04438
23789000	11196000	20445000	12855000	19414000	10644000	9199200	16344000	20185000	12491000	12993000	7633900	0	0	0	9923500	8853200	9996500	13315000	0	14279000	14301000	12671000	21063000	0	12638000	5834200	12166000	12730000	0	0				2093;2094	394	137	4	4	4	14.1	14.1	14.1	52.37	0	57.861	1014500000	250	462	Q04461
0	0	719490	0	0	0	0	0	0	0	0	0	0	0	0	0	0	0	0	0	0	0	0	0	0	0	0	0	0	0	0				2095;2096;2097	395	138;139;140;141	1	1	1	4.3	4.3	4.3	76.859	0.0094017	1.3787	2530300	1	668	Q04511
0	0	0	0	0	0	0	0	0	0	0	671070	0	0	0	0	0	0	1124200	0	0	0	0	0	0	0	0	0	0	0	0	+			2098			1	1	1	6.6	6.6	6.6	21.997	1	-2	9499200	2	196	Q04603
20941000	18023000	24206000	11552000	14035000	25291000	12861000	4889000	16969000	15415000	12485000	3768000	11014000	14208000	10172000	26713000	16024000	19658000	11582000	26796000	12590000	36173000	18683000	8973300	7121200	26508000	29324000	27697000	6606600	0	22760000				2099;2100	396		4	4	4	5.1	5.1	5.1	62.993	0	151.65	1301200000	756	552	Q04636
0	0	0	0	0	0	0	0	0	0	0	0	0	0	0	0	0	0	0	0	0	0	0	0	0	0	0	0	409250	0	0				2101			1	1	1	3.7	3.7	3.7	32.916	0.0063869	1.7314	8449700	2	295	Q04947
0	0	0	0	0	0	0	0	0	0	0	0	0	0	0	0	0	0	1881500	0	0	0	0	0	0	0	0	0	0	0	0				2102;2103			4	4	4	19.2	19.2	19.2	11.834	0	8.5951	22300000	5	104	Q04964
25415000	0	18418000	6086100	18884000	21514000	13982000	13324000	17672000	0	21010000	5590400	11530000	2331100	21130000	28856000	20315000	0	19383000	18497000	26420000	14118000	25536000	9057300	9902800	38511000	20343000	33884000	3547200	0	16913000				2104;2105;2106			2	2	2	4.2	4.2	4.2	67.555	0	12.225	1544300000	177	590	Q05021
88675000	37985000	52216000	25436000	33747000	41994000	23661000	15803000	48473000	34046000	29456000	25487000	39634000	28575000	16410000	101600000	73189000	52280000	126390000	129790000	66512000	119600000	83944000	132220000	67267000	112270000	93777000	108680000	111480000	0	114090000				2107;2108;2109;2110;2111		142;245	10	10	10	42.9	42.9	42.9	26.47	0	323.31	5063600000	1459	226	Q05024
18512000	0	0	0	5984600	0	8605800	0	8484300	0	0	3947900	0	0	21098000	10794000	3039000	0	4717500	0	14545000	0	0	0	0	9637500	7886000	0	0	0	0				2112;2113;2114;2115;2116	398		6	6	6	23.9	23.9	23.9	43.459	0	154.71	457840000	158	376	Q05043
0	0	0	0	0	0	0	0	0	0	0	0	0	0	3584800	0	0	0	0	0	0	0	0	0	0	0	0	0	0	0	0				2117;2118			2	2	2	2.7	2.7	2.7	93.344	0.0064755	1.8171	25218000	4	843	Q05050
0	0	0	0	0	0	0	0	0	0	0	0	0	5110600	0	0	0	0	0	0	0	0	0	0	0	0	0	0	0	0	0				2119			4	4	4	3.5	3.5	3.5	174.53	0	5.6815	17822000	6	1514	Q05471
0	0	0	0	0	0	0	0	0	0	0	0	0	815970	0	0	0	0	0	0	0	0	0	0	0	0	0	0	0	0	0	+			2120			1	1	1	3.9	3.9	3.9	46.488	1	-2	5543800	2	409	Q05543
0	0	0	0	0	0	0	0	0	0	0	0	0	0	0	2404200	0	0	633140	0	0	0	2562000	0	0	2952400	2406200	0	0	0	0				2121;2122		143	3	3	3	3	3	3	123.55	0	4.1625	96545000	15	1077	Q05549
0	0	0	0	0	0	0	0	0	0	0	0	0	0	2275200	0	0	0	0	0	0	0	0	0	0	0	0	0	0	0	0	+			2123			1	1	1	2.7	2.7	2.7	40.162	1	-2	10264000	5	365	Q05610
0	0	0	1489900	1450400	1307700	608640	1531600	5665300	1576300	1048200	2112500	0	0	13046000	0	2204800	1237900	5614800	0	1241100	2025100	0	0	0	1650900	0	0	0	0	0				2124;2125			3	3	3	8.3	8.3	8.3	29.564	0.0079295	1.5071	169960000	36	265	Q05775
0	0	0	0	0	0	0	0	0	0	0	0	0	0	7243900	0	0	0	0	0	0	0	0	0	0	0	0	0	0	0	0				2126			1	1	1	2.3	2.3	2.3	151.28	0.0020121	2.4546	77132000	11	1341	Q05854
0	0	0	0	0	0	0	0	0	0	0	0	0	1617200	0	0	0	0	0	0	0	0	0	0	0	0	0	0	0	0	0				2127			1	1	1	5.5	5.5	5.5	37.718	0	3.5873	4701700	1	343	Q05937
0	0	0	0	0	140610000	0	0	0	3499700000	0	0	0	0	0	0	0	4022400000	0	0	4888800000	0	5374500000	0	0	0	4884000000	0	0	0	0				2128			6	6	6	9.4	9.4	9.4	117.58	0	10.389	110880000000	134	1027	Q06010
0	0	0	1982800	12355000	19669000	12377000	87292000	103510000	138070000	78207000	233880000	191320000	188720000	353500000	718870000	365640000	439810000	304210000	454890000	302860000	556510000	559400000	409250000	130240000	361840000	226900000	295460000	171590000	185870000	251750000				2129;2130;2131;2132;2133;2134;2135;2136;2137;2138;2139;2140;2141;2142;2143;2144;2145	399	144;145;146;147;148;149;150;151;246;247	17	17	17	46.7	46.7	46.7	53.863	0	323.31	22672000000	3101	482	Q06032
0	0	0	0	0	0	0	0	0	0	0	0	0	2957900	0	0	0	0	0	0	0	0	0	0	0	0	0	0	0	0	0				2146			1	1	1	2.6	2.6	2.6	101.12	0	12.853	6366600	2	887	Q06106
3894900	0	1963600	1805900	3904000	0	0	904810	4617500	1723300	0	3325200	0	0	2560000	15044000	5487700	0	0	0	0	9902300	6142500	1013500	0	6204900	2863300	0	0	0	0				2147;2148;2149;2150	401;402		4	4	4	5.2	5.2	5.2	132.97	0	86.22	276670000	145	1176	Q06156
0	0	0	4507800	0	0	0	1237100	0	0	0	0	0	714190	0	0	0	0	1172400	0	0	0	0	0	0	0	0	0	0	0	0				2151;2152;2153;2154			3	3	3	48.8	48.8	48.8	9.8337	0	6.8922	38737000	21	86	Q06177
13660000	24759000	19772000	26997000	11243000	11894000	11367000	9041000	7084800	12230000	12121000	11125000	1684100	7432100	6502200	12421000	11834000	9498200	8321100	18766000	6094800	6544900	7804400	7334100	12230000	10891000	7248000	5374500	6774800	0	14534000				2155	403		23	23	23	63.1	63.1	63.1	45.859	0	278.14	1030000000	661	401	Q06178;P53204
112450000	105090000	105790000	72026000	49144000	46835000	33350000	33641000	38681000	58353000	32838000	47976000	36194000	9167200	62963000	63717000	66319000	33076000	35443000	51351000	23180000	81134000	41945000	22701000	17105000	71052000	67812000	61477000	21317000	0	38139000				2156;2157		152;153	4	4	4	9.9	9.9	9.9	35.508	0	323.31	3937000000	754	304	Q06188
0	0	0	0	0	0	0	0	0	2753200	0	3008200	4969900	0	0	129700000	14517000	31306000	52940000	58605000	11787000	49439000	62415000	40337000	8674300	63903000	22776000	31615000	12236000	11853000	10702000				2158;2159;2160;2161;2162;2163	404;405	154;155;248	6	6	6	55.3	55.3	55.3	22.365	0	216.4	1696500000	502	188	Q06201
0	0	0	0	0	0	0	0	0	0	0	0	0	1892400	0	0	0	0	0	0	0	0	0	0	0	0	0	0	0	0	0				2164			3	3	3	19.9	19.9	19.9	22.151	0	2.7922	16804000	7	201	Q06252
0	0	0	1822700	0	0	0	1923300	0	0	0	3169700	1248100	0	550050	0	0	0	3845800	0	0	0	0	1880500	0	0	0	0	1705200	0	0				2165;2166			1	1	1	2.4	2.4	2.4	37.315	0	2.6342	83658000	67	330	Q06263
0	0	0	0	0	0	0	0	0	0	0	0	0	0	0	0	0	0	32417	0	0	0	0	0	0	0	0	0	0	0	0	+			2167			1	1	1	2.2	2.2	2.2	55.467	1	-2	963200	1	489	Q06266
0	0	0	0	0	0	0	0	0	0	0	0	0	0	0	0	0	0	0	0	0	0	300980	0	0	0	0	0	0	0	0				2168			1	1	1	2.4	2.4	2.4	52.541	0.0078466	1.469	2215800	2	456	Q06340
0	0	0	0	0	0	0	0	0	0	0	0	0	0	6388700	0	0	0	0	0	0	0	0	0	0	0	0	0	0	0	0				2169			4	4	4	9.1	9.1	9.1	72.409	0	3.461	305800000	14	628	Q06344
5749000	5309800	7137200	2068700	7133600	6549300	9392100	4461400	4682000	8070100	8692000	988630	3651000	0	1881300	3169300	2951400	6180700	1527400	0	6308700	4103200	3356100	1576700	0	0	2781000	5027500	6595800	8347800	0				2170	406		7	7	7	70.3	70.3	70.3	11.312	0	12.361	353200000	134	101	Q06405
10333000	14046000	24035000	3965700	8727300	9280500	6486900	5486600	7998100	9350700	3297500	0	0	0	18304000	11447000	4992000	11275000	14215000	0	6213200	24755000	0	5090100	0	15949000	9975300	23858000	4224600	0	0				2171;2172;2173	407	156;157;249;250;251;252	7	7	7	9.9	9.9	9.9	102.3	0	231.09	1143100000	389	889	Q06488
0	0	0	0	0	0	0	0	0	0	0	0	0	1210900	0	0	0	0	0	0	0	0	0	0	0	0	0	0	0	0	0				2174;2175			2	2	2	8.5	8.5	8.5	46.082	0	4.1717	22181000	3	410	Q06505
0	0	0	0	0	0	0	0	0	0	0	0	0	1867900	0	0	0	0	0	0	0	0	0	0	0	0	0	0	0	0	0				2176			2	2	2	4	4	4	65.053	0	18.16	7815100	5	573	Q06506
0	0	0	0	0	0	0	0	0	0	0	0	0	9066900	0	0	0	0	0	0	0	0	0	0	0	0	0	0	0	0	0				2177;2178			1	1	1	5.6	5.6	5.6	28.212	0	49.275	253320000	220	250	Q06511
0	0	0	0	0	0	0	0	0	0	0	0	0	0	0	0	0	0	1331400	0	0	0	0	0	0	0	0	0	0	0	0				2179;2180			2	2	2	3.6	3.6	3.6	64.665	0	4.5519	48833000	3	576	Q06604
4885900	6111700	0	0	5969800	6018300	5185100	0	5788900	5573200	4594200	0	0	0	13894000	11056000	6304500	4714100	0	0	3431500	4959800	9428400	0	0	7747700	4018200	3286600	0	0	0				2181;2182			2	2	2	8.1	8.1	8.1	25.411	0	8.3296	292820000	158	221	Q06616
75085000	77614000	87857000	104760000	87935000	71669000	56426000	89181000	80570000	64434000	74267000	247560000	51222000	0	876440000	208310000	123310000	112410000	180970000	122660000	124800000	242750000	229110000	137230000	70575000	420580000	296510000	255020000	201920000	255360000	251280000				2183;2184;2185;2186;2187	411;412	158	7	7	7	21	21	21	39.273	0	34.163	17715000000	1976	347	Q06624
0	0	0	0	0	0	0	0	0	0	0	0	0	0	0	0	0	0	0	0	0	0	0	0	0	0	0	0	0	0	0				2188		253;288	1	1	1	2.2	2.2	2.2	77.058	0.0093617	1.3652	0	1	674	Q06629
0	0	0	0	0	0	0	0	0	0	0	0	0	488930	0	0	0	0	0	0	0	0	0	0	0	0	0	0	0	0	0				2189			2	2	2	3.2	3.2	3.2	117.85	0.0064815	1.8268	1690600	2	1035	Q06680
0	0	0	0	0	0	0	0	0	6434300	0	0	0	0	0	33497000	15432000	0	0	28487000	14214000	20946000	33134000	0	0	37032000	14149000	18524000	0	0	26450000				2190;2191;2192	414	159	3	3	3	6.7	6.7	6.7	78.545	0	4.8212	486190000	51	689	Q06683
0	0	0	0	0	0	0	0	0	0	0	0	0	0	4598900	0	0	0	0	0	0	0	0	0	0	0	0	0	0	0	0				2193			1	1	1	0.7	0.7	0.7	152.99	0.0077855	1.4334	15450000	4	1349	Q06706
0	0	0	0	0	0	0	0	0	0	0	0	0	0	0	0	0	0	0	0	0	0	0	0	0	0	0	0	0	0	0	+			2194			1	1	1	3.8	3.8	3.8	48.312	1	-2	0	3	420	Q07349
0	0	0	0	0	0	1376900	0	1486600	0	1365300	0	0	0	0	0	1067300	0	0	0	1289600	1341800	0	0	0	0	1160800	0	0	0	0				2195			6	6	6	16.4	16.4	16.4	50.308	0	23.642	86213000	77	446	Q07478
0	0	0	0	0	0	0	0	0	0	0	0	0	8456800	0	0	0	0	0	0	0	0	0	0	0	0	0	0	0	0	0	+			2196			1	1	1	9.1	9.1	9.1	40.64	1	-2	17177000	2	353	Q07532
10399000	8951900	10443000	14132000	6111600	5335300	8812000	5034700	5420100	6403200	11184000	10931000	8719400	0	4770800	7271400	6135600	9008300	7732600	0	7547100	8277000	5463800	9098900	5466700	3302500	8123600	10134000	6075000	0	0				2197			9	9	9	19	19	19	70.689	0	60.329	743870000	384	649	Q07655;P34761
12678000	29210000	10429000	21831000	8455100	3579400	3360200	21109000	5147000	3034800	3727800	18805000	0	0	22487000	7507900	4158800	1992200	17955000	0	7474600	3135600	2601100	9640500	0	4523300	2770700	2949600	9558000	0	0				2198;2199	422	163;164;255	7	7	7	5.3	5.3	5.3	62.629	0	59.209	862000000	330	551	Q07657
20101000	20346000	18936000	11025000	11697000	15299000	15596000	15536000	14175000	18428000	14826000	2278100	26429000	13453000	31443000	28362000	21110000	20882000	4070900	17422000	11423000	28987000	19433000	6520100	7702300	28067000	19046000	22578000	9698500	0	13336000				2200;2201;2202			5	5	5	11	11	11	57.794	0	209.94	1239800000	675	502	Q07979
0	0	0	0	0	0	0	0	0	0	0	0	0	0	0	0	0	0	0	0	0	0	0	575650	0	0	0	0	0	0	0	+			2203			1	1	1	1.6	1.6	1.6	78.211	1	-2	22090000	1	693	Q08001
0	0	0	1742000	0	0	0	0	0	0	0	0	0	0	0	0	0	0	0	0	0	0	0	0	0	0	0	0	0	0	0				2204			1	1	1	2.4	2.4	2.4	65.004	0.0064516	1.7958	20815000	5	573	Q08179
0	0	0	0	0	16738000	0	21833000	0	12952000	0	40679000	46183000	16465000	15613000	147600000	54002000	0	31796000	99693000	0	45958000	113900000	102110000	0	91727000	111160000	65263000	42143000	0	33425000				2205			4	4	4	3.4	3.4	3.4	126.04	0	323.31	2999400000	235	1093	Q08204
3934600	3086400	0	2523300	0	0	0	0	0	0	0	0	1217800	1761500	0	0	0	0	1875400	0	0	1760900	0	0	0	0	0	0	0	0	0				2206;2207;2208;2209			7	7	7	22.4	22.4	22.4	51.941	0	43.399	60884000	33	459	Q08208
0	0	0	0	0	0	0	0	318570	0	0	0	0	0	0	0	0	0	0	0	0	0	0	0	0	0	0	0	0	0	0	+			2210			1	1	1	2.8	2.8	2.8	55.923	1	-2	2591300	2	501	Q08229
143340000	91415000	144060000	97903000	110560000	104020000	98693000	139860000	176920000	115110000	117610000	141820000	109440000	73918000	124160000	151210000	174960000	174000000	302730000	146050000	127130000	207160000	212400000	172900000	121990000	215150000	187010000	210410000	134370000	129860000	148860000				2211;2212;2213;2214;2215;2216;2217;2218;2219;2220;2221;2222;2223;2224;2225		165;256	29	29	29	90.3	90.3	90.3	12.589	0	323.31	15763000000	4060	113	Q08245
0	0	0	0	0	0	0	0	0	0	0	0	0	0	20129000	0	0	0	0	0	0	0	0	0	0	0	0	0	0	0	0				2226			1	1	1	3.3	3.3	3.3	26.556	0	17.101	404410000	162	240	Q08285
0	0	0	0	0	0	0	0	0	0	0	0	0	0	1109000	0	0	0	0	0	0	0	0	0	0	0	0	0	0	0	0				2227;2228			2	2	2	4.1	4.1	4.1	46.869	0	5.2969	22528000	4	411	Q08412
0	0	4583500	0	0	1676400	0	0	1354400	0	0	0	0	0	0	0	0	0	0	0	0	0	0	0	0	0	0	1078200	0	0	0				2229;2230;2231			2	2	2	7.8	7.8	7.8	25.35	0	14.869	62461000	26	219	Q08465
0	0	0	0	0	0	0	0	0	0	0	0	0	0	2083800	0	0	0	0	0	0	0	0	0	0	0	0	0	0	0	0				2232			1	1	1	3.2	3.2	3.2	66.705	0	4.4962	31543000	8	590	Q08490
6451700	4036600	6311700	0	6780300	8901200	9905700	7511700	9773400	9563600	11188000	5481900	6214300	1511500	12019000	6536400	7030200	6746700	8295200	10921000	8961200	11622000	10248000	0	4662000	7254900	5086700	13073000	2478700	0	7854600				2233;2234;2235;2236;2237;2238;2239			8	8	8	73.3	73.3	73.3	13.092	0	67.016	529730000	314	116	Q08561
0	0	0	0	0	0	0	0	0	0	0	0	0	681390	2832600	0	0	0	0	0	0	0	0	0	0	0	0	0	0	0	0				2240;2241	424;62		6	6	5	4.9	4.9	4.4	184.4	0	5.5695	20374000	9	1619	Q08562
0	0	0	0	0	0	0	0	0	0	0	0	0	1322200	0	0	0	0	0	0	0	0	0	0	0	0	0	0	0	0	0				2242			2	2	2	4.6	4.6	4.6	95.379	0	11.038	19381000	7	821	Q08581
0	0	0	0	0	0	0	0	0	0	0	0	0	1757600	0	0	0	0	0	0	0	0	0	0	0	0	0	0	0	0	0	+			1593;1594;1595;1597;1598;2243			10	2	2	53.3	22.9	22.9	12.739	1	-2	13949000	1	105	Q08745
3327100	2806700	4020700	3594000	2238400	2826700	2054000	3024500	2988200	2602900	2294500	2345400	2970100	0	4110700	4086600	2610700	0	0	0	1397300	2892100	3650500	0	0	3497800	2630800	2201600	955120	0	0				2244;2245;2246;2247;2248;2249;2250	431	168;169	8	8	8	41.2	41.2	41.2	25.967	0	13.763	187220000	156	228	Q08747
0	0	0	0	0	0	0	0	0	0	0	0	0	0	0	0	0	0	180720	0	0	0	0	0	0	0	0	0	0	0	0				2251			1	1	1	2.6	2.6	2.6	57.052	0.0077653	1.4193	6256500	1	506	Q08923
0	0	0	0	0	0	0	0	0	0	0	0	0	1204500	0	0	0	0	0	0	0	0	0	0	0	0	0	0	0	0	0				2252			1	1	1	2.1	2.1	2.1	69.693	0.0019841	2.3749	24523000	3	612	Q08949
0	0	0	0	0	0	0	0	0	0	0	0	0	14785000	0	0	0	0	0	0	0	0	0	0	0	0	0	0	0	0	0				2253			2	2	2	2.8	2.8	2.8	106.92	0.006381	1.7288	59188000	5	932	Q08951
5422700	0	0	2829000	6336800	5413800	5440100	3716800	16323000	12399000	0	5328700	0	0	10311000	0	0	0	3562700	0	0	0	0	0	0	0	0	6940800	0	0	0				2254		171	3	3	3	7	7	7	47.104	0	9.6008	425210000	29	416	Q08957
0	0	0	0	0	0	0	0	0	0	0	0	0	0	0	0	0	0	0	0	0	0	0	615360	0	0	0	0	0	0	0	+			2255			1	1	1	9.6	9.6	9.6	17.445	1	-2	5510100	1	146	Q08971
0	0	0	0	0	0	0	0	0	0	0	0	0	4746600	0	0	0	0	0	0	0	0	0	0	0	0	0	0	0	0	0				2256;2257			1	1	1	6.1	6.1	6.1	45.14	0	16.509	31798000	10	392	Q12020
0	0	0	0	0	0	0	0	0	0	0	0	0	0	0	0	0	0	7168700	0	0	0	0	0	0	0	0	0	0	0	0				2258			1	1	1	6	6	6	29.255	0	8.6551	49903000	6	265	Q12044
0	0	0	0	0	0	0	0	0	0	0	0	0	379100	0	0	0	0	0	0	0	0	0	0	0	0	0	0	0	0	0				2259			2	2	2	3.4	3.4	3.4	91.26	0.0019763	2.3305	822130	1	791	Q12050
0	0	0	0	0	0	0	0	0	0	0	0	0	3098300	0	0	0	0	0	0	0	0	0	0	0	0	0	0	0	0	0	+			2260;2261;2262			1	1	1	5.8	5.8	5.8	16.93	1	-2	626300000	65	156	Q12056
0	0	0	0	0	0	0	0	0	0	0	0	0	2779200	0	0	0	0	0	0	0	0	0	0	0	0	0	0	0	0	0				2263			4	4	4	11.4	11.4	11.4	52.555	0.0071492	1.6065	10548000	4	455	Q12080
0	0	0	0	0	0	0	0	0	0	0	0	0	1965400	0	0	0	0	0	0	0	0	0	0	0	0	0	0	0	0	0				2264;2265			2	2	2	3.7	3.7	3.7	84.361	0	4.3774	7541100	6	748	Q12098
0	0	0	0	0	0	0	0	0	0	0	0	0	0	925360	0	0	0	0	0	0	0	0	0	0	0	0	0	0	0	0				2266;2267			2	2	2	7.8	7.8	7.8	28.414	0	2.7405	16435000	8	243	Q12134
0	0	0	0	0	0	0	0	0	0	0	0	0	0	0	0	0	0	0	0	0	0	0	0	0	0	0	714190	0	0	0				2268			1	1	1	1.1	1.1	1.1	130.12	0.0071685	1.623	10827000	3	1133	Q12139
0	0	0	0	0	0	0	0	0	0	0	0	0	0	2521600	0	0	0	0	0	0	0	0	0	0	0	0	0	0	0	0				2269			2	2	2	17.4	17.4	17.4	17.13	0.0019685	2.3123	28474000	2	149	Q12156
0	0	0	0	0	0	0	1626500	1626300	0	0	0	0	0	7840600	0	0	0	5694300	0	0	0	1652100	1923000	0	0	0	2414400	0	0	0				2270;2271;2272;2273	434		5	5	5	29.6	29.6	29.6	24.955	0	4.5636	127690000	27	226	Q12159
0	0	0	0	0	0	0	0	0	0	0	0	0	0	0	9553800	0	0	0	0	0	2848600	4478900	960670	0	4279900	3312900	2809300	0	0	0				2274;2275	435		4	4	4	6.3	6.3	6.3	102.21	0	37.113	73155000	58	901	Q12175
0	0	0	0	25304000	26740000	23153000	32937000	30790000	26829000	25843000	48380000	46867000	45304000	81597000	81141000	34765000	32715000	34228000	51409000	20321000	36105000	60131000	27636000	0	64613000	44399000	47057000	15416000	0	16810000				2276;2277;2278;2279;2280;2281;2282;2283;2284;2285;2286;2287;2288;2289;2290;2291			20	20	20	35.6	35.6	35.6	77.201	0	134.68	2661500000	770	680	Q12188
0	0	0	0	0	0	0	0	0	0	0	0	0	0	0	0	0	0	0	0	0	0	0	0	0	0	0	0	0	0	0	+			2292;2293;275;276;277;280;281;282;284			13	1	1	60.7	6.6	6.6	27.696	1	-2	0	1	244	Q12213
0	5200800	0	4274500	3850500	2401300	0	3313100	0	5156000	3028700	4101100	4167100	0	7126400	6930900	3774500	8179700	16314000	0	5257300	5528800	5585500	3276700	0	30695000	9820700	18930000	2184900	0	0				2294;2295;2296;2297;2298		172;173	6	6	6	13.2	13.2	13.2	81.177	0	142.44	533350000	146	726	Q12216
0	0	0	0	0	0	0	0	8975100	11076000	6935900	49427000	20742000	23855000	0	16210000	23360000	19827000	45116000	29534000	14146000	9067900	18973000	71190000	22214000	16684000	22916000	27121000	58276000	44092000	47840000				2299;2300;2301;2302;2303			9	9	9	23.1	23.1	23.1	26.63	0	323.31	1931700000	848	238	Q12223
1445200	0	2911900	505250	1319600	0	0	0	2389900	0	0	0	0	0	2257300	2796300	1738400	0	2429800	0	1933400	0	3696600	1422600	0	3245000	2436000	2442200	780110	0	0				2304;2305;2306			4	4	4	13.2	13.2	13.2	38.071	0	14.044	105120000	76	341	Q12230
0	0	0	0	0	0	0	0	0	0	0	0	0	38179000	0	0	0	0	0	0	0	0	0	0	0	0	0	0	0	0	0				2307;2308;2309		259	1	1	1	2.1	2.1	2.1	56.068	0	4.8731	80567000	1	484	Q12234
0	0	0	0	0	0	0	0	0	0	0	0	0	10409000	0	0	0	0	0	0	0	0	0	0	0	0	0	0	0	0	0				2310			1	1	1	1.3	1.3	1.3	97.609	0	3.7396	452100000	328	843	Q12244
0	0	0	0	0	0	437030	0	0	0	0	0	0	0	0	0	0	0	0	0	0	0	0	0	0	0	0	0	0	0	0	+			2311			1	1	1	6	6	6	18.19	1	-2	17189000	5	151	Q12247
0	0	0	0	0	0	0	38800000	0	0	0	53804000	30189000	26052000	0	0	0	0	129900000	0	0	0	63708000	89289000	0	0	0	0	27759000	0	0				2312;2313;2314	436;437		6	6	6	14.4	14.4	14.4	51.768	0	5.4006	2544300000	71	445	Q12250
3471400	5556100	3746000	1353700	2763600	1959900	928760	2302600	5431900	4436300	0	5447700	8344300	3819100	5890700	33242000	9890400	2120400	2695000	10401000	4644800	11886000	17303000	6213200	2374400	36302000	21324000	16902000	6679400	7559400	8223600				2315;2316;2317;2318;2319;2320;2321;2322;2323;2324;2325			15	15	15	14.2	14.2	14.2	162.19	0	115.65	568160000	392	1418	Q12267
0	0	0	0	0	0	0	0	0	0	0	0	0	0	0	0	0	0	0	0	0	0	0	720030	0	0	0	0	0	0	0				2326			3	3	3	22.3	22.3	22.3	15.413	0	4.0713	11061000	8	139	Q12305
1862000000	2628900000	2204700000	1467500000	2761700000	2714100000	1908400000	2890600000	2611600000	2898400000	2337300000	3825300000	3191800000	3205600000	4235100000	6917100000	4196200000	4170800000	3016100000	2272400000	4095100000	7009200000	5909200000	2416100000	4926700000	4573400000	5758900000	5301700000	1909900000	811360000	2884300000				2327;2328;2329;2330;2331;2332;2333;2334;2335	440;441;442	174;175	29	29	28	92.1	92.1	92.1	11.597	0	323.31	350710000000	17569	101	Q12306;REV__Q12092
0	0	0	0	0	0	0	0	0	0	0	0	244120	0	0	0	0	0	0	0	0	0	0	0	0	0	0	0	0	0	0				2336			1	1	1	1.1	1.1	1.1	86.028	0.0071942	1.6278	1222000	3	748	Q12311
0	0	0	0	0	0	0	0	0	0	0	0	0	0	0	0	0	0	0	0	0	0	0	0	0	0	2812300	0	0	0	0				2337			1	1	1	6.1	6.1	6.1	24.743	0	5.5706	109830000	52	213	Q12314
18255000	11938000	18536000	61751000	27800000	16635000	51148000	123470000	29525000	25566000	57340000	73034000	16358000	0	12646000	30033000	34570000	63401000	54422000	2104900	62359000	53419000	61264000	133970000	22570000	44756000	54803000	106920000	95001000	29828000	31144000				2338;2339	445;446		20	20	20	45.9	45.9	45.9	42.816	0	323.31	5039600000	982	375	Q12329
0	0	0	0	676240	185750	683330	0	935590	347130	972240	0	0	0	0	0	179800	1693500	0	0	1120000	487820	163430	21693000	0	0	472100	829480	0	0	0				2340	447		5	5	5	50	50	50	20.965	0	143.12	295510000	108	198	Q12335
3226400	2352900	2608000	0	2411500	2347800	1752200	0	2384700	0	0	0	0	0	1477800	0	0	0	1759500	0	0	0	0	3875100	0	0	4946500	0	6087400	0	0				2341			3	3	3	15.4	15.4	15.4	24.7	0	78.006	174950000	116	227	Q12354
0	0	0	0	0	0	0	4198200	0	0	0	0	0	0	5929200	0	0	0	10835000	0	0	0	0	0	0	0	0	0	0	0	0				2342;2343			1	1	1	3	3	3	48.382	0	15.473	119560000	60	437	Q12363
0	0	0	0	4521600	9787300	6314300	6927700	12389000	16740000	7898300	45793000	46727000	24371000	4083000	24313000	13480000	7777600	8223100	14975000	5140400	5085700	11670000	5892800	0	9336800	8344600	5299500	11314000	10976000	2422800				2344;2345			2	2	2	8.8	8.8	8.8	40.855	0	122.58	856260000	311	352	Q12366
0	0	0	1167900	0	0	0	0	0	0	0	0	0	3208200	9018400	0	0	0	1025200	0	3924500	0	0	3936600	0	4520500	5295900	4909200	11005000	19124000	12368000				2346;2347		176;177	1	1	1	3	3	3	48.87	0	17.054	232790000	117	434	Q12398
0	0	0	0	0	0	0	0	0	0	0	0	0	374560	0	0	0	0	0	0	0	0	0	0	0	0	0	0	0	0	0	+			2348			1	1	1	2.9	2.9	2.9	53.81	1	-2	878170	2	477	Q12406
0	0	0	0	0	0	0	0	0	0	0	0	0	0	0	0	0	0	0	0	0	0	0	0	0	0	0	0	0	0	0	+			2349;2350			2	2	2	6	6	6	50.7	1	-2	0	2	451	Q12417
32832000	20088000	9487900	9370500	13230000	12744000	23742000	22418000	32060000	16978000	45541000	27266000	16103000	38850000	53854000	23058000	12556000	25879000	41503000	0	37276000	20328000	16238000	20669000	13004000	18440000	15658000	36064000	33335000	0	58714000				2351;2352;2353;2354;2355;2356	448;449;450	178;260;261;262	12	12	12	25.7	25.7	25.7	56.263	0	238.23	2772800000	1100	513	Q12427
[truncated: 27 more rows]
[truncated: 41 more columns]

## Sheet: ALL SUMO & Phosphoryalted sites
T: Protein IDs	T: Gene names	M: GlyGly (K) site positions	M: Phospho (STY) site positions	T: Protein names
O13297	CET1	29;196;197;223		mRNA-capping enzyme subunit beta
[truncated: 723 more rows]

## Sheet: Replication
T: Protein IDs	T: Gene names	M: GlyGly (K) site positions	M: Phospho (STY) site positions	T: Protein names
[truncated: 34 more rows]

[truncated: 19 more sheets: >Chromosome axes, >Recombination, DNA Repair, >Synaptonemal Complex, DNA Damage Response, Telomeres, Chromosome segregation, Cell cycle & dvision, Cytoskeleton & spindle, Histones, modifiers, remodelers, Transcription, Ribosome, Translation, >SUMO, ubiquitin & proteasome, Metabolism, Mitochondria, Transport & Trafficking, Chaperones, Other]
